# Supplementary material for: Human cytomegalovirus infection coopts chromatin organization to diminish TEAD1 transcription factor activity
Source: bioRxiv preprint, doi:10.1101/2024.04.12.588762, version 4 (2025-06-02)
Supplement: Supplemental Dataset 2 [file 588762_file18.xlsx]

## Sheet: README
Human cytomegalovirus extensively re-organizes the human genome, diminishing TEAD1 transcription factor activity
This document contains differential chromatin accessibility in Uninfected and HCMV infected cells in HFF and ARPE as measured by DiffBind
Comments, additions, or subtractions should be addressed to the corresponding authors:
Leah Kottyan (Leah.Kottyan@cchmc.org)
Matt Weirauch (Matthew.Weirauch@cchmc.org)
ATAC-seq data were aligned to the hg19 genome. Differential chromaitn accesssibility was measured by DiffBind. HOMER was used to calculate motif enrichment statistics.
sheet name	Link
HFF HCMV vs UI DESeq2 results	Go to sheet
ARPE HCMV vs UI DESeq2 results	Go to sheet
HFF HCMV opened chromatin	Go to sheet
HFF HCMV closed chromatin	Go to sheet
HFF unchanged chromatin	Go to sheet
ARPE HCMV opened chromatin	Go to sheet
ARPE HCMV closed chromatin	Go to sheet
ARPE unchanged chromatin	Go to sheet
HOMER motif analysis Ranks	Go to sheet
HOMER motif analysis-log10pvalues	Go to sheet
HOMER motif analysis % of target sequences	Go to sheet

## Sheet: HFF_HCMV_vs_UI_deseq2
seqnames	start	end	width	strand	Conc	Conc_HCMV	Conc_UI	Log2FoldChange	p.value	FDR	HFF_HCMV_Rep1	HFF_HCMV_Rep2	HFF_UI_Rep1	HFF_UI_Rep2
chr12	132970024	132971104	1081	*	10.5372	11.4977	6.32626	4.9749	1.9121e-66	4.33724e-61	3011.21	2772.03	73.89	86.59
chr16	3221968	3222711	744	*	9.53993	10.5111	4.87945	5.35462	4.8023e-61	5.44656e-56	1412.77	1505.96	35.47	23.4
chr22	39380986	39381576	591	*	9.30833	10.2614	5.34422	4.70974	2.24632e-54	1.69845e-49	1224.21	1230.53	39.9	41.35
chr4	1331058	1331730	673	*	9.40378	10.347	5.7088	4.44931	1.45967e-50	8.27746e-46	1269.17	1335.67	54.68	49.93
chr1	147736912	147737502	591	*	9.10694	10.0534	5.32808	4.52325	6.89725e-50	3.12902e-45	1048.7	1076.53	42.12	38.23
chr5	1950585	1951291	707	*	9.2316	10.1751	5.53	4.45034	2.5795e-49	9.75186e-45	1170.54	1141.69	49.5	42.91
chr8	6506271	6507172	902	*	9.33332	10.2777	5.60917	4.46821	1.02945e-48	3.33588e-44	1163.29	1319.38	53.94	43.69
chr6	39247931	39248731	801	*	9.36336	10.3005	5.81204	4.30637	1.47519e-47	4.18272e-43	1183.6	1338.63	55.41	56.95
chr2	27299202	27299520	319	*	8.43326	9.39229	4.27478	4.84933	3.8018e-47	8.77327e-43	665.77	678.2	19.21	19.5
chr2	65096926	65097337	412	*	9.42229	10.3606	5.8449	4.32963	3.86775e-47	8.77327e-43	1366.36	1263.11	50.98	63.97
chr6	28678204	28678956	753	*	8.78231	9.74158	4.6152	4.84696	5.25252e-46	1.08312e-41	762.96	949.18	30.29	18.72
chrY	17861355	17862332	978	*	9.21209	10.1526	5.58351	4.37147	6.30065e-46	1.19098e-41	1041.45	1234.97	42.85	53.05
chr19	51399787	51400342	556	*	8.67219	9.61673	4.94345	4.45908	2.49027e-45	4.34516e-41	752.8	817.39	29.55	31.99
chr2	29491975	29492702	728	*	8.99009	9.93213	5.32363	4.39901	5.3992e-45	8.7479e-41	957.32	996.57	46.55	33.55
chr1	3233092	3233496	405	*	8.52209	9.49235	3.9073	5.21348	1.56814e-44	2.37136e-40	723.79	716.7	21.43	8.58
chr19	46167795	46168326	532	*	8.80509	9.76008	4.78054	4.71182	3.12499e-44	4.43028e-40	839.83	894.39	35.47	19.5
chr5	180600503	180601297	795	*	10.019	10.9456	6.68457	4.09241	5.07035e-44	6.76537e-40	1930.6	2013.87	87.93	117.8
chr20	37499127	37499837	711	*	8.71392	9.66519	4.80194	4.61203	5.48051e-44	6.90638e-40	807.92	815.91	34.73	21.06
chr8	126510396	126510898	503	*	8.50716	9.45609	4.66159	4.55002	3.01447e-43	3.59882e-39	733.95	670.8	29.55	21.06
chr4	8872900	8874078	1179	*	9.44577	10.3704	6.14939	4.05249	4.74069e-43	5.37668e-39	1212.61	1434.88	70.19	71.77
chr6	28770282	28770849	568	*	8.62229	9.56327	4.98146	4.36934	5.6342e-43	6.08577e-39	722.34	790.74	28.08	35.11
chr6	27258332	27258897	566	*	8.39002	9.33785	4.57479	4.52199	6.20671e-43	6.39943e-39	638.21	655.99	26.6	21.06
chr17	32198138	32199220	1083	*	9.30387	10.25	5.5338	4.48003	1.01848e-42	1.00445e-38	1153.14	1282.36	59.11	33.55
chr6	158441286	158441862	577	*	8.38418	9.34296	4.23438	4.80849	1.62126e-42	1.5323e-38	630.96	667.83	24.38	13.26
chr6	27651942	27652590	649	*	9.566	10.4987	6.10966	4.19889	2.13066e-42	1.9332e-38	1402.62	1491.15	55.41	82.69
chr6	28715442	28715971	530	*	8.60976	9.57544	4.19932	5.02399	4.83665e-42	4.21962e-38	747	778.89	26.6	10.14
chr6	27598451	27599837	1387	*	9.18053	10.103	5.92456	4.01069	5.26287e-42	4.42141e-38	1037.1	1162.42	59.85	61.63
chr19	51412416	51413114	699	*	8.67888	9.61108	5.23366	4.18576	6.61454e-42	5.35851e-38	762.96	801.1	35.47	39.79
chr1	16860724	16862194	1471	*	9.53748	10.4571	6.33248	3.96027	1.5971e-41	1.24922e-37	1377.96	1433.4	89.4	71.77
chr12	44209956	44210500	545	*	8.02998	8.99524	3.63679	5.00334	4.45791e-41	3.37064e-37	478.66	541.97	15.52	9.36
chr21	32930939	32931986	1048	*	10.6195	11.5304	7.55875	3.82259	9.08319e-41	6.64629e-37	2969.14	2946.76	162.55	214.54
chr19	50706515	50707125	611	*	8.83583	9.7668	5.41606	4.15674	1.86172e-40	1.31967e-36	877.54	864.78	35.47	49.93
chr14	21130959	21131822	864	*	9.36423	10.2832	6.1693	3.94745	2.81631e-40	1.93584e-36	1272.08	1220.17	62.8	81.13
chr7	149052047	149053159	1113	*	8.46319	9.39915	4.93764	4.24838	3.32159e-40	2.216e-36	642.57	707.82	33.99	27.3
chr1	48502214	48502835	622	*	8.17345	9.12166	4.34781	4.50505	5.85125e-39	3.79213e-35	541.03	573.06	25.12	15.6
chr2	119671363	119672176	814	*	8.48772	9.42573	4.9162	4.2817	6.04569e-39	3.80931e-35	645.47	730.03	36.2	24.18
chr20	590273	591230	958	*	8.79386	9.7149	5.56294	3.9714	1.30802e-38	8.01889e-35	847.08	833.68	53.2	41.35
chr6	27639815	27640372	558	*	7.90562	8.86263	3.81575	4.73322	2.20472e-38	1.31605e-34	516.37	414.62	12.56	15.6
chr6	29813167	29813556	390	*	7.80706	8.78386	2.83654	5.43615	2.40321e-38	1.39775e-34	403.23	478.29	9.61	4.68
chr7	51293798	51294545	748	*	8.43719	9.38871	4.5177	4.57398	1.86533e-37	1.05779e-33	683.18	657.47	31.77	14.04
chr16	58400018	58400530	513	*	7.83856	8.79102	3.89153	4.60331	2.39009e-37	1.32231e-33	406.14	479.77	13.3	16.38
chr6	446472	447208	737	*	8.31919	9.24831	4.93667	4.10327	2.45865e-37	1.32785e-33	609.2	607.12	34.73	26.52
chr22	48970891	48971635	745	*	9.28622	10.1875	6.36843	3.67168	4.40728e-37	2.3249e-33	1137.18	1194.99	86.45	78.79
chr6	97386680	97387600	921	*	8.20171	9.13839	4.66041	4.24319	4.66117e-37	2.40295e-33	556.99	570.1	30.29	20.28
chr16	3241366	3242178	813	*	9.71633	10.6267	6.66311	3.8005	5.20185e-37	2.62209e-33	1454.84	1707.35	86.45	116.24
chr6	27520649	27521569	921	*	8.82399	9.73758	5.71952	3.84716	5.58024e-37	2.75168e-33	777.46	929.93	54.68	50.71
chr11	61497618	61498305	688	*	8.58721	9.50311	5.44486	3.88198	5.83628e-37	2.8167e-33	703.49	747.8	46.55	40.57
chr15	39889674	39892002	2329	*	10.5309	7.24379	11.4551	-4.01567	6.50541e-37	3.07423e-33	162.45	140.67	2201.08	3413.86
chr12	120449903	120450465	563	*	8.2227	9.15351	4.8062	4.13128	6.95129e-37	3.21789e-33	555.54	583.43	31.77	24.18
chr19	30744330	30744888	559	*	8.07363	9.01273	4.4771	4.28974	1.05719e-36	4.79607e-33	520.72	512.35	26.6	17.94
chr5	42089726	42090710	985	*	8.19556	9.14368	4.37231	4.48567	1.29832e-36	5.77449e-33	500.42	630.81	26.6	14.82
chr1	161427719	161428408	690	*	7.67375	8.65352	2.5074	5.56628	1.51852e-36	6.62399e-33	362.62	442.75	5.91	5.46
chr16	56713789	56714146	358	*	8.15555	9.09212	4.61642	4.23763	1.68275e-36	7.20188e-33	558.44	533.08	29.55	19.5
chr1	17198996	17200292	1297	*	9.37772	10.2736	6.53354	3.59903	2.12884e-36	8.94234e-33	1215.51	1260.15	90.88	94.4
chr10	119496065	119496783	719	*	8.51767	9.43486	5.35365	3.89839	2.96338e-36	1.22216e-32	652.72	731.51	44.33	37.45
chr5	11903385	11904824	1440	*	9.42919	10.3386	6.39046	3.78171	3.08252e-36	1.24859e-32	1209.7	1380.09	96.79	70.99
chr2	135532642	135533162	521	*	7.85158	8.80989	3.71777	4.74228	4.16382e-36	1.65699e-32	414.84	482.74	17.73	8.58
chr10	98849058	98849727	670	*	8.79623	9.73645	5.17331	4.30833	4.34205e-36	1.69812e-32	841.28	864.78	48.77	23.4
chr6	27512842	27513853	1012	*	9.65894	10.5631	6.69975	3.7075	4.98788e-36	1.91764e-32	1393.92	1631.83	90.88	117.02
chr8	22718215	22718548	334	*	8.10886	9.03576	4.76978	4.05636	7.61438e-36	2.87863e-32	504.77	544.93	28.82	25.74
chr15	81200347	81201702	1356	*	9.50366	6.08796	10.4344	-4.1235	1.5664e-35	5.82473e-32	79.78	56.27	1150.41	1617.22
chr19	51111223	51111718	496	*	8.9243	9.83146	5.92019	3.74755	1.94807e-35	7.12712e-32	881.9	940.3	52.46	68.65
chrX	4157878	4159321	1444	*	8.2248	9.16745	4.54334	4.35321	2.36646e-35	8.52042e-32	593.25	556.78	31.03	15.6
chr6	28510295	28511017	723	*	9.85136	10.7466	7.0162	3.58635	2.7165e-35	9.62791e-32	1668.06	1768.06	113.79	145.1
chr18	13615364	13615861	498	*	7.66128	8.61044	3.80939	4.50133	3.97748e-35	1.38802e-31	362.62	419.06	14.78	13.26
chr10	22634059	22634684	626	*	8.49638	9.40581	5.45772	3.77645	4.50988e-35	1.54997e-31	697.68	658.95	46.55	41.35
chr17	11501517	11502448	932	*	8.9883	9.8851	6.13175	3.60437	6.19062e-35	2.09586e-31	909.45	981.76	73.15	67.09
chr12	22174059	22174516	458	*	8.8075	9.70812	5.89849	3.65472	6.85068e-35	2.28521e-31	799.22	873.66	56.89	62.41
chr2	105470274	105470857	584	*	8.31768	9.25057	4.85815	4.15548	7.99616e-35	2.62866e-31	588.9	629.33	36.94	21.06
chr12	6874258	6874699	442	*	8.39093	9.30838	5.22262	3.89721	8.64256e-35	2.80057e-31	615.01	653.03	31.77	42.91
chr7	54614140	54614818	679	*	8.52088	9.42871	5.50674	3.75176	1.07143e-34	3.42302e-31	722.34	655.99	48.03	42.91
chr21	45638197	45638644	448	*	7.7891	8.72336	4.30054	4.18121	1.85828e-34	5.85437e-31	435.15	410.18	20.69	18.72
chr2	104051449	104051880	432	*	7.64142	8.59829	3.55605	4.68851	4.1179e-34	1.27955e-30	322.01	453.12	11.82	11.7
chr5	180490510	180490909	400	*	7.49161	8.44691	3.45704	4.64512	4.18448e-34	1.28266e-30	332.16	365.75	11.82	10.14
chr2	147631352	147632296	945	*	8.61915	9.5191	5.71952	3.64095	5.4724e-34	1.65508e-30	709.29	758.16	54.68	50.71
chr3	195286738	195287294	557	*	8.23611	9.14802	5.15854	3.80792	6.01804e-34	1.79616e-30	549.73	584.91	33.99	37.45
chr2	23514095	23514630	536	*	8.85534	5.13587	9.79951	-4.37746	9.09078e-34	2.67801e-30	36.26	34.06	690.1	1092.19
chr11	2292018	2292594	577	*	8.69008	9.59744	5.68307	3.73943	9.24974e-34	2.68991e-30	758.6	790.74	59.85	42.91
chr19	19716730	19717350	621	*	7.83713	8.76354	4.5074	4.03432	1.28644e-33	3.69372e-30	426.44	442.75	23.64	21.84
chr9	135112990	135113272	283	*	8.26573	9.18092	5.1351	3.85174	1.81304e-33	5.14068e-30	572.94	587.87	40.64	29.65
chr1	2186840	2187855	1016	*	9.70248	10.5852	7.0237	3.42765	1.89391e-33	5.30368e-30	1425.83	1646.63	131.52	128.72
chr6	27473217	27473834	618	*	9.2278	10.1145	6.50153	3.47298	2.31981e-33	6.41712e-30	1045.8	1171.3	93.84	87.37
chr6	58141665	58142782	1118	*	7.88867	8.82048	4.45161	4.12525	2.57449e-33	7.03585e-30	452.55	451.64	26.6	17.16
chr10	1757958	1758523	566	*	7.80905	8.75867	3.94433	4.49072	2.76206e-33	7.45858e-30	424.99	441.27	21.43	9.36
chr8	21544585	21544924	340	*	8.12049	9.03957	4.92407	3.91255	2.8377e-33	7.57268e-30	584.55	467.93	30.29	30.43
chr7	155263908	155264345	438	*	7.45705	8.40976	3.50215	4.5674	4.01268e-33	1.05837e-29	330.71	349.47	13.3	9.36
chr2	241324886	241325572	687	*	8.54787	9.44315	5.71165	3.57649	6.48401e-33	1.69055e-29	696.23	695.97	50.98	53.83
chr2	69327242	69327844	603	*	9.32538	6.07606	10.2475	-3.95764	8.0751e-33	2.08146e-29	62.37	72.56	972.35	1458.85
chr22	48972172	48973016	845	*	8.53901	9.45065	5.46576	3.79504	9.39543e-33	2.39458e-29	632.41	767.05	51.72	36.67
chr18	13288474	13289088	615	*	7.80832	8.74644	4.23438	4.2379	1.45085e-32	3.65665e-29	420.64	438.31	24.38	13.26
chr11	34226432	34227060	629	*	9.15203	10.0403	6.4063	3.4888	1.52612e-32	3.80407e-29	979.08	1126.88	77.58	92.06
chr6	28710391	28710880	490	*	7.45038	8.40122	3.55098	4.51604	1.55118e-32	3.82452e-29	310.4	365.75	13.3	10.14
chr21	45610487	45610882	396	*	8.60611	4.45244	9.565	-4.72428	1.73369e-32	4.22854e-29	30.46	13.33	602.91	911.98
chr6	71108429	71109061	633	*	7.76805	8.71166	4.06255	4.35479	1.81076e-32	4.36954e-29	336.51	501.99	16.26	17.16
chr15	39879442	39879924	483	*	9.2925	6.09085	10.2119	-3.9104	3.31053e-32	7.89545e-29	66.72	69.6	942.79	1429.2
chr1	236182168	236182901	734	*	8.94752	5.57504	9.87613	-4.06344	3.34153e-32	7.89545e-29	43.51	51.83	751.43	1128.07
chr15	39888681	39889245	565	*	8.50834	4.68124	9.45659	-4.45484	3.43073e-32	8.02264e-29	24.66	26.65	554.89	850.34
chr20	48334257	48334633	377	*	8.40369	9.304	5.49893	3.63756	3.58271e-32	8.21687e-29	586	678.2	42.85	47.59
chr3	13891626	13892221	596	*	8.24251	9.15488	5.15771	3.80427	3.58624e-32	8.21687e-29	645.47	494.58	34.73	36.67
chr14	20980403	20981066	664	*	7.88495	8.80497	4.67213	3.92148	3.7362e-32	8.47487e-29	419.19	475.33	22.9	28.08
chr16	49315512	49316509	998	*	10.5579	11.4561	7.68272	3.60928	4.73642e-32	1.05604e-28	2722.56	2896.42	157.38	253.54
chr3	68981183	68982103	921	*	9.2438	10.1255	6.577	3.41072	4.74873e-32	1.05604e-28	1082.06	1152.05	87.19	103.76
chr15	74102020	74102836	817	*	8.84414	9.73436	6.07356	3.50882	4.88106e-32	1.07493e-28	818.07	885.51	74.63	60.07
chr15	89892131	89892790	660	*	8.02366	8.9326	4.99264	3.75285	5.44044e-32	1.1866e-28	498.97	478.29	33.25	30.43
chr7	138437202	138437749	548	*	7.92047	8.84468	4.63211	3.9893	5.62537e-32	1.21525e-28	429.34	490.14	19.95	29.65
chr16	71460005	71461252	1248	*	11.3377	12.2166	8.70303	3.37859	7.4188e-32	1.58756e-28	4640.1	4879.19	343.57	489.92
chr18	47766334	47767024	691	*	7.40373	8.34956	3.64156	4.39426	7.91393e-32	1.67769e-28	314.76	337.62	14.04	10.92
chr15	81244889	81247083	2195	*	11.0915	8.26073	11.9864	-3.56543	8.32028e-32	1.73502e-28	336.51	276.91	3269.48	4845.41
chr8	579164	579683	520	*	7.62396	8.5605	4.08536	4.20184	8.33737e-32	1.73502e-28	359.72	395.37	20.69	13.26
chr13	53420195	53420741	547	*	8.3479	9.27888	4.92789	4.09733	1.08988e-31	2.24745e-28	638.21	604.16	41.38	19.5
chr7	157725083	157725786	704	*	7.66232	8.59637	4.17825	4.15337	1.14689e-31	2.34369e-28	371.32	402.77	22.17	14.04
chr14	21125246	21126063	818	*	8.00209	8.91084	4.9739	3.74722	1.45325e-31	2.94323e-28	490.26	472.37	33.99	28.86
chr19	42959716	42960390	675	*	8.6841	9.59496	5.62313	3.78033	1.51208e-31	3.03528e-28	815.17	731.51	36.94	61.63
chr3	130560114	130560742	629	*	7.64098	8.59699	3.58339	4.63001	1.54883e-31	3.08178e-28	355.37	419.06	17.73	6.24
chr9	130717612	130718381	770	*	9.69826	10.584	6.98335	3.45465	1.6699e-31	3.29379e-28	1476.59	1593.32	106.4	146.66
chr17	72352872	72353657	786	*	8.02635	8.93679	4.97201	3.76976	2.03882e-31	3.98678e-28	504.77	475.33	35.47	27.3
chr19	35953299	35954151	853	*	7.72864	8.66586	4.17496	4.21001	2.27135e-31	4.36881e-28	385.83	426.47	23.64	12.48
chr8	142634950	142635598	649	*	8.57433	9.47346	5.68597	3.61654	2.2727e-31	4.36881e-28	628.06	793.7	56.15	46.81
chr14	65355915	65356257	343	*	7.40913	8.34982	3.77522	4.28394	2.88224e-31	5.49396e-28	308.95	343.54	12.56	14.82
chr5	57962336	57963288	953	*	7.43961	8.3837	3.72229	4.34918	2.93952e-31	5.55645e-28	346.67	321.33	16.26	10.14
chr1	16485484	16485891	408	*	7.63655	8.57669	4.01565	4.26595	3.1545e-31	5.91354e-28	377.13	386.48	21.43	10.92
chr11	113845389	113846305	917	*	8.94151	9.82044	6.30654	3.37472	4.25808e-31	7.91692e-28	908	900.32	84.97	73.33
chr18	35061473	35061826	354	*	7.63244	8.56805	4.1147	4.17662	4.63054e-31	8.53943e-28	382.93	376.12	22.17	12.48
chr1	1981327	1982433	1107	*	9.35998	10.2529	6.55412	3.5369	5.12896e-31	9.38231e-28	1198.1	1242.38	113.05	74.89
chr20	22633394	22634538	1145	*	8.16289	9.06434	5.24227	3.64399	6.32517e-31	1.1478e-27	562.79	507.91	41.38	34.33
chr3	27762673	27764014	1342	*	9.44793	10.3182	6.90814	3.28217	6.75704e-31	1.21643e-27	1248.87	1304.57	113.05	127.16
chr1	48483306	48483817	512	*	8.08008	8.97965	5.18563	3.61981	7.39896e-31	1.32151e-27	507.67	501.99	37.68	35.11
chr7	156802473	156803946	1474	*	9.17924	10.0528	6.60435	3.31592	8.88821e-31	1.5751e-27	1021.14	1103.18	91.62	102.98
chr13	112720961	112721669	709	*	8.0628	8.96681	5.10531	3.67676	9.5148e-31	1.67306e-27	510.57	490.14	38.42	30.43
chr7	157726541	157726956	416	*	7.22525	8.18471	3.05182	4.71564	1.08765e-30	1.89778e-27	284.3	297.64	10.34	6.24
chr6	28784503	28785263	761	*	9.13094	10.0146	6.44047	3.42733	1.17313e-30	2.03131e-27	981.98	1086.9	74.63	99.08
chr14	21121039	21121544	506	*	8.19339	9.08889	5.35437	3.56631	1.27829e-30	2.19664e-27	533.78	555.29	43.59	38.23
chr19	35959600	35959966	367	*	7.55516	8.48366	4.18481	4.04755	1.51974e-30	2.59192e-27	391.63	324.29	19.21	17.16
chr10	112174137	112174815	679	*	8.56843	9.4514	5.88651	3.41742	1.59466e-30	2.69938e-27	668.67	731.51	60.59	57.73
chr12	108522905	108524233	1329	*	9.36614	10.2349	6.84256	3.26422	2.06783e-30	3.47444e-27	1161.84	1248.3	108.61	120.92
chr11	124945718	124946183	466	*	7.76197	8.67517	4.66394	3.80263	2.44394e-30	4.07619e-27	417.74	399.81	28.08	22.62
chr19	38997441	38998239	799	*	9.3127	10.1816	6.78786	3.26479	2.69577e-30	4.46339e-27	1095.12	1227.57	107.87	113.12
chr11	65236380	65236640	261	*	7.63587	8.55361	4.46245	3.87254	2.86042e-30	4.6901e-27	390.18	361.31	20.69	23.4
chr2	11622642	11623708	1067	*	9.63142	10.499	7.12053	3.25121	2.87405e-30	4.6901e-27	1380.86	1513.36	129.3	149.01
chr10	134901208	134902372	1165	*	8.72603	9.60423	6.09928	3.36287	2.92523e-30	4.73952e-27	762.96	793.7	73.15	63.97
chr2	225430039	225430785	747	*	8.43608	4.72311	9.37999	-4.33947	3.38109e-30	5.43926e-27	23.21	29.62	514.99	817.58
chr7	29153172	29153748	577	*	8.78675	9.69258	5.80258	3.70099	3.76476e-30	6.01383e-27	806.47	848.49	40.64	70.99
chr20	62947716	62948804	1089	*	8.68231	9.56056	6.055	3.36317	4.91266e-30	7.79262e-27	716.54	793.7	63.54	69.43
chr17	63384643	63385536	894	*	9.39047	6.29425	10.3036	-3.80029	5.40827e-30	8.51919e-27	71.07	85.89	978.26	1549.34
chr15	81152612	81153433	822	*	8.61074	5.28141	9.53712	-4.00797	6.18251e-30	9.67162e-27	33.36	44.42	605.13	880.77
chr14	21316572	21317268	697	*	8.38578	9.27178	5.66745	3.44855	8.10812e-30	1.25971e-26	575.84	660.43	51.72	49.93
chr1	235242742	235243123	382	*	7.54689	8.46737	4.32586	3.90888	8.56578e-30	1.32176e-26	351.02	356.87	22.17	17.94
chr11	82406613	82407116	504	*	8.58937	9.46983	5.93671	3.38614	1.15816e-29	1.77505e-26	728.14	690.05	55.41	67.09
chr12	110278471	110278870	400	*	8.16357	9.05863	5.3303	3.5559	1.2998e-29	1.97513e-26	481.56	584.91	39.9	40.57
chr4	3642313	3642685	373	*	7.93628	8.83655	5.03212	3.62299	1.30612e-29	1.97513e-26	464.16	450.16	29.55	35.89
chr14	21074473	21074763	291	*	7.61522	8.53158	4.46515	3.84746	1.39482e-29	2.09529e-26	368.42	371.68	19.21	24.96
chr1	209826322	209826688	367	*	7.68294	8.6072	4.39371	3.97275	1.43233e-29	2.13749e-26	375.68	404.25	15.52	26.52
chrX	124338897	124339735	839	*	7.78247	8.68991	4.77413	3.71796	1.49171e-29	2.21154e-26	440.95	385	25.86	28.86
chr1	38995129	38995616	488	*	8.29363	9.17855	5.58841	3.43376	1.92189e-29	2.83081e-26	593.25	565.66	50.98	45.25
chr4	122400570	122401468	899	*	7.94313	8.84202	5.05809	3.60128	2.46238e-29	3.60351e-26	439.5	478.29	36.2	30.43
chr4	3768746	3769165	420	*	7.67783	8.58688	4.64514	3.73735	2.51636e-29	3.6589e-26	401.78	367.23	25.86	24.18
chr14	105977989	105978678	690	*	8.23415	9.14248	5.2123	3.73021	2.81552e-29	4.06782e-26	545.38	584.91	27.34	46.81
chr5	89854122	89854982	861	*	9.1641	10.0279	6.69174	3.20916	2.83703e-29	4.07295e-26	1060.3	1027.66	97.53	109.22
chr1	5855763	5856700	938	*	7.81467	8.72212	4.8062	3.71333	3.06744e-29	4.37604e-26	398.88	445.72	31.77	24.18
chr18	56282909	56283320	412	*	8.29579	9.18043	5.59396	3.43072	3.18624e-29	4.51712e-26	591.8	568.62	44.33	52.27
chr7	127623768	127624403	636	*	7.91694	8.8289	4.83872	3.78047	3.34668e-29	4.71509e-26	411.94	497.54	22.9	34.33
chr1	53961295	53961755	461	*	7.99066	8.88576	5.15688	3.55374	3.74501e-29	5.24374e-26	504.77	441.27	35.47	35.89
chr4	55825577	55826365	789	*	9.29147	6.27917	10.1992	-3.71776	3.9148e-29	5.44784e-26	78.33	77	910.28	1440.91
chr1	60279991	60281168	1178	*	8.74841	9.62238	6.16884	3.31143	4.70861e-29	6.51255e-26	741.2	835.16	77.58	66.31
chr10	43839467	43840019	553	*	7.92805	8.85964	4.49557	4.08484	4.79544e-29	6.59245e-26	395.98	533.08	30.29	14.82
chr20	34730622	34731313	692	*	8.3603	9.24541	5.65279	3.43289	5.49074e-29	7.50283e-26	584.55	629.33	56.15	44.47
chr9	104500080	104501175	1096	*	8.60566	9.47967	6.02573	3.31147	5.57861e-29	7.57725e-26	688.98	738.91	69.45	60.85
chr1	56462994	56463595	602	*	8.04494	3.94313	9.0023	-4.63976	5.94992e-29	8.03349e-26	15.96	14.81	409.33	616.3
chr7	26488800	26489791	992	*	8.38418	9.28746	5.43732	3.65392	7.21531e-29	9.68436e-26	638.21	611.56	54.68	31.99
chr7	98246196	98247109	914	*	9.57069	10.4333	7.11007	3.1959	7.40243e-29	9.87707e-26	1377.96	1387.5	123.39	152.91
chr10	57390615	57391485	871	*	8.84796	9.71573	6.3347	3.24643	7.54677e-29	1.00108e-25	800.67	881.07	84.97	76.45
chr7	149484471	149485068	598	*	7.95343	8.85601	5.01666	3.64813	8.68949e-29	1.14596e-25	507.67	419.06	28.08	36.67
chr14	24075134	24075815	682	*	7.41081	8.34212	3.9842	4.07712	9.44824e-29	1.23882e-25	333.61	315.41	19.95	11.7
chr11	83385505	83385922	418	*	7.23511	8.17418	3.63918	4.22188	9.57655e-29	1.24842e-25	274.14	303.56	14.78	10.14
chr6	27618335	27618901	567	*	7.54698	8.46454	4.37662	3.85445	9.82703e-29	1.27376e-25	346.67	359.83	24.38	17.16
chr2	127937295	127937695	401	*	8.57444	5.07314	9.50929	-4.14418	9.92158e-29	1.27871e-25	37.71	29.62	540.85	916.66
chr12	113568106	113568830	725	*	8.35487	9.24695	5.56041	3.51238	1.06113e-28	1.35987e-25	593.25	621.93	56.15	38.23
chr10	79343237	79343691	455	*	7.31572	8.24163	3.99544	3.98899	1.1156e-28	1.42165e-25	297.35	308	15.52	16.38
chr1	117647535	117648087	553	*	8.24039	4.79945	9.17239	-4.09264	1.15866e-28	1.46827e-25	27.56	28.13	472.14	681.84
chr18	6355797	6356419	623	*	8.54426	9.4388	5.71788	3.54497	1.22711e-28	1.54637e-25	613.56	774.45	42.85	62.41
chr19	16441228	16441858	631	*	9.69149	10.5643	7.12459	3.29821	1.34623e-28	1.68711e-25	1553.47	1474.86	115.26	163.83
chr3	52208954	52209442	489	*	7.91693	8.81778	5.00465	3.61989	1.75943e-28	2.19282e-25	462.7	439.79	37.68	26.52
chr15	74045925	74046410	486	*	7.965	8.88577	4.739	3.89989	1.98918e-28	2.46561e-25	433.7	512.35	35.47	17.94
chr1	160651226	160651688	463	*	7.38502	8.31328	4.01932	4.02188	2.01729e-28	2.48687e-25	310.4	325.77	19.95	12.48
chr7	5686328	5686984	657	*	8.15355	4.68294	9.08696	-4.11653	2.05054e-28	2.51419e-25	21.76	29.62	458.84	628.79
chr9	91360310	91360857	548	*	9.34374	6.40745	10.2463	-3.64293	2.07959e-28	2.53611e-25	95.73	74.04	965.7	1463.53
chr6	26758033	26758763	731	*	9.26208	10.1367	6.67505	3.31672	2.17787e-28	2.64176e-25	1095.12	1156.49	84.23	120.14
chr3	132756929	132757993	1065	*	9.66951	10.5276	7.25341	3.14972	2.46768e-28	2.97737e-25	1438.88	1513.36	137.43	167.73
chr20	1809171	1809446	276	*	7.18774	8.14622	3.04823	4.65401	2.59605e-28	3.11568e-25	237.88	328.73	11.08	5.46
chr12	52609165	52609698	534	*	8.5925	9.47316	5.93768	3.38088	2.82363e-28	3.37098e-25	642.57	778.89	53.94	68.65
chr1	79009468	79010367	900	*	8.4147	4.63811	9.36108	-4.36931	2.84106e-28	3.37403e-25	26.11	23.69	462.53	852.69
chr7	149487150	149487706	557	*	8.36504	9.2679	5.42427	3.64406	2.88965e-28	3.41386e-25	593.25	639.7	54.68	31.21
chr15	100881276	100882553	1278	*	9.92738	10.7774	7.5872	3.07407	2.92075e-28	3.43272e-25	1801.5	1708.83	181.76	202.83
chr18	47720645	47721789	1145	*	8.84679	9.7096	6.38412	3.1942	3.82873e-28	4.47667e-25	787.61	886.99	82.01	85.03
chr1	40154378	40154700	323	*	7.62438	8.53164	4.61884	3.70234	4.13695e-28	4.81225e-25	366.97	373.16	28.08	21.06
chr16	84281440	84281940	501	*	8.24312	9.13001	5.51393	3.45012	4.81796e-28	5.57583e-25	514.92	605.64	39.9	51.49
chr13	27033345	27034023	679	*	7.73172	8.63478	4.78811	3.6461	5.01883e-28	5.77881e-25	364.07	430.91	30.29	24.96
chr5	101631532	101632580	1049	*	8.38051	9.26208	5.715	3.3869	6.10897e-28	6.99851e-25	617.91	610.08	60.59	44.47
chr5	128300606	128301845	1240	*	8.82187	9.69002	6.30465	3.24529	6.28419e-28	7.16306e-25	805.02	847.01	88.66	69.43
chr15	56074939	56075730	792	*	9.06447	6.0608	9.97161	-3.70156	6.32666e-28	7.17542e-25	59.47	74.04	781.72	1226.37
chr6	70861478	70861869	392	*	7.03731	7.99754	2.83654	4.69494	6.65971e-28	7.51557e-25	271.24	239.89	9.61	4.68
chr3	181412715	181414193	1479	*	9.34724	10.2041	6.94343	3.13488	6.7405e-28	7.56908e-25	1121.23	1237.94	132.26	113.9
chr19	6590366	6591242	877	*	8.11264	8.99997	5.37805	3.45154	7.3144e-28	8.17307e-25	530.88	493.1	47.29	35.89
chr6	51972815	51973315	501	*	7.24294	8.17078	3.8855	4.01204	7.55154e-28	8.39668e-25	268.34	308	15.52	14.04
chr4	8912543	8914022	1480	*	9.2918	10.1454	6.91795	3.10512	8.13393e-28	8.99077e-25	1080.61	1184.63	125.61	116.24
chr12	113277100	113277583	484	*	7.6742	8.5796	4.69634	3.67932	8.16511e-28	8.99077e-25	374.23	390.93	21.43	30.43
chr19	10532510	10532928	419	*	8.08527	8.97142	5.36518	3.4376	8.34358e-28	9.11577e-25	498.97	504.95	46.55	35.89
chr20	22679034	22679509	476	*	7.45859	8.36881	4.40767	3.74218	8.359e-28	9.11577e-25	320.56	340.58	22.17	20.28
chr17	42138772	42139285	514	*	8.10543	4.35675	9.05075	-4.33925	9.63861e-28	1.04609e-24	23.21	17.77	410.81	649.85
chr1	17004241	17004919	679	*	8.84455	9.71791	6.27174	3.29928	1.01199e-27	1.09309e-24	749.9	934.38	68.71	85.81
chr6	28663392	28663836	445	*	7.47977	8.40547	4.16354	3.9778	1.22703e-27	1.31909e-24	285.75	392.41	14.78	21.06
chr4	36245480	36246580	1101	*	8.43937	9.35162	5.35649	3.7672	1.24147e-27	1.32832e-24	681.73	624.89	55.41	26.52
chr20	20712301	20713016	716	*	7.79989	8.70316	4.85311	3.64824	1.26211e-27	1.338e-24	359.72	473.85	26.6	31.21
chrX	136647727	136648552	826	*	8.32374	9.21327	5.56174	3.47825	1.26231e-27	1.338e-24	517.82	669.31	40.64	53.83
chr19	46170911	46171553	643	*	9.92716	10.7962	7.40073	3.25398	1.31014e-27	1.38224e-24	1795.7	1760.65	136.69	201.27
chr12	41582073	41582888	816	*	8.13185	9.01164	5.48709	3.3669	1.47456e-27	1.5485e-24	487.36	544.93	42.12	47.59
chr14	94254559	94255796	1238	*	9.20613	10.0748	6.68336	3.24869	1.49738e-27	1.56521e-24	1016.79	1140.2	118.96	86.59
chr2	86026820	86027158	339	*	7.55561	8.47701	4.31841	3.90081	1.80446e-27	1.87756e-24	336.51	376.12	25.86	14.04
chr11	117855259	117855565	307	*	7.01054	7.96564	2.98231	4.55451	1.82823e-27	1.8936e-24	239.33	260.62	10.34	5.46
chr15	81191831	81192936	1106	*	9.16906	6.35782	10.0624	-3.52124	1.99826e-27	2.06031e-24	87.03	77	861.52	1277.08
chr16	30626654	30627040	387	*	8.51715	9.38546	5.99824	3.24575	2.16769e-27	2.22489e-24	686.08	651.55	57.63	70.21
chr20	47847136	47847797	662	*	7.94028	3.80024	8.89878	-4.64635	2.33195e-27	2.3827e-24	13.05	14.81	367.96	586.66
chr1	147825631	147826209	579	*	7.65882	8.57441	4.5216	3.81207	2.48281e-27	2.52546e-24	364.07	398.33	29.55	16.38
chr14	106465373	106466192	820	*	7.24678	8.18096	3.75992	4.11254	2.62919e-27	2.66241e-24	285.75	294.68	17.73	9.36
chr6	27263066	27263469	404	*	7.79226	8.68049	5.04651	3.46025	2.69687e-27	2.71882e-24	414.84	405.74	31.77	34.33
chr4	66535964	66536708	745	*	9.11459	9.9742	6.68371	3.15938	3.00307e-27	3.01411e-24	1025.49	986.2	90.14	115.46
chr6	27569743	27570581	839	*	7.50134	8.42766	4.17331	3.97647	3.13016e-27	3.12783e-24	349.57	339.1	24.38	11.7
chr12	56854921	56855517	597	*	7.71683	8.60999	4.90839	3.51835	3.1848e-27	3.16847e-24	374.23	407.22	28.08	31.99
chr2	22042981	22043479	499	*	8.44011	5.16776	9.36345	-3.9336	3.3091e-27	3.27776e-24	31.91	39.98	507.6	809.78
chr3	9768700	9769145	446	*	7.75756	8.64733	4.99264	3.47598	3.94627e-27	3.8919e-24	385.83	416.1	33.25	30.43
chr5	7714208	7715071	864	*	8.20946	9.08564	5.60557	3.32524	4.87728e-27	4.78925e-24	509.12	577.51	44.33	53.05
chr1	230871215	230871557	343	*	7.08247	8.03584	3.10782	4.50347	4.94607e-27	4.83587e-24	250.93	273.95	12.56	4.68
chr6	18226598	18227233	636	*	8.6982	5.68209	9.60616	-3.70552	5.25639e-27	5.11722e-24	46.42	56.27	614	944.74
chr1	209715774	209716395	622	*	7.89012	8.77518	5.18318	3.42047	5.28349e-27	5.12162e-24	443.85	432.39	39.9	32.77
chr19	50831797	50832969	1173	*	10.1764	11.0412	7.69405	3.20803	5.31302e-27	5.12833e-24	1966.86	2247.83	169.2	244.96
chr18	42148986	42149770	785	*	8.42266	5.43442	9.32877	-3.67999	5.50964e-27	5.29558e-24	42.06	44.42	537.16	748.93
chr11	35547859	35548309	451	*	8.04946	8.93693	5.31325	3.44752	6.36109e-27	6.07407e-24	429.34	550.85	42.85	36.67
chr19	42041536	42042014	479	*	7.08293	8.04049	2.97476	4.60496	6.37316e-27	6.07407e-24	240.78	285.79	11.82	3.9
chr6	26744999	26745412	414	*	7.26271	8.18912	3.93287	3.983	7.20216e-27	6.82987e-24	269.79	313.93	11.82	18.72
chr20	38345561	38345996	436	*	7.28519	8.20627	4.05362	3.89119	7.22639e-27	6.82987e-24	290.1	300.6	19.95	13.26
chr15	81212163	81212855	693	*	8.47073	5.25082	9.39115	-3.88361	7.48487e-27	7.04482e-24	40.61	35.54	511.3	831.62
chr2	242559644	242560298	655	*	8.13343	9.00634	5.56545	3.28842	7.80168e-27	7.31266e-24	526.53	501.99	50.24	44.47
chr11	120754084	120754817	734	*	7.70784	8.60222	4.88349	3.52807	8.10788e-27	7.56839e-24	362.62	414.62	32.51	26.52
chr7	76950501	76951122	622	*	8.50403	4.97467	9.44016	-4.14646	8.37131e-27	7.78226e-24	37.71	25.17	490.61	898.71
chr1	56240115	56241026	912	*	8.77456	5.54873	9.69532	-3.88769	8.78079e-27	8.12962e-24	55.12	38.5	608.83	1049.28
chr2	97207108	97207672	565	*	9.44532	6.36734	10.3573	-3.75749	9.20727e-27	8.48981e-24	105.89	59.23	1021.85	1601.61
chr10	52311831	52312505	675	*	8.57583	5.33695	9.49732	-3.90098	9.30319e-27	8.54353e-24	29.01	51.83	574.84	870.63
chr12	20598571	20599003	433	*	6.96839	7.91956	3.05898	4.4543	1.02256e-26	9.3528e-24	211.77	272.46	8.87	7.8
chr9	140916813	140918417	1605	*	8.70221	9.58453	6.02797	3.38741	1.04498e-26	9.51941e-24	710.74	824.8	79.8	50.71
chr2	107502373	107504295	1923	*	10.0737	10.9111	7.84437	2.95649	1.07116e-26	9.71887e-24	1859.52	1991.66	220.92	238.72
chr2	66218468	66219486	1019	*	7.47401	8.38735	4.37375	3.77377	1.15442e-26	1.04326e-23	336.51	333.18	25.86	15.6
chr1	165414078	165414655	578	*	8.08631	8.9834	5.22581	3.56354	1.21318e-26	1.09201e-23	452.55	559.74	28.82	46.03
chr8	101450102	101450914	813	*	8.84502	9.70525	6.40806	3.16229	1.2453e-26	1.11649e-23	816.62	852.93	73.89	95.96
chr14	77368027	77368367	341	*	8.26134	9.13893	5.64162	3.33825	1.31518e-26	1.17451e-23	536.68	590.83	42.12	57.73
chr10	1540960	1542440	1481	*	10.4214	11.4052	4.94239	5.56588	1.32663e-26	1.18008e-23	2623.93	2800.16	44.33	17.16
chr20	4050380	4050733	354	*	8.00939	8.88775	5.38091	3.34425	1.40976e-26	1.24913e-23	442.4	504.95	44.33	39.01
chr1	84280935	84281418	484	*	8.37566	5.19598	9.29377	-3.84637	1.44713e-26	1.27726e-23	34.81	38.5	488.39	766.87
chr13	44090383	44091051	669	*	8.28207	5.0457	9.20342	-3.89557	1.77119e-26	1.55721e-23	27.56	38.5	469.92	709.14
chr13	27354762	27355305	544	*	7.1137	8.04931	3.59575	4.13111	1.95276e-26	1.71021e-23	298.8	231	14.04	10.14
chr11	113802556	113803187	632	*	7.47735	8.37742	4.57604	3.5957	2.01813e-26	1.76067e-23	343.77	321.33	25.86	21.84
chr11	34272590	34273603	1014	*	8.86539	9.74089	6.26907	3.31474	2.15602e-26	1.87377e-23	873.19	838.12	59.85	94.4
chr1	30328673	30328985	313	*	7.2361	8.16008	3.95204	3.93159	2.30825e-26	1.9984e-23	259.64	312.45	18.47	12.48
chr3	13920979	13922603	1625	*	9.21346	10.0707	6.80594	3.13063	2.34285e-26	2.02065e-23	1029.84	1120.95	127.82	95.96
chr1	48504671	48505482	812	*	7.52142	8.42304	4.59821	3.61466	2.40293e-26	2.06462e-23	313.3	373.16	26.6	21.84
chr8	55371585	55372672	1088	*	8.49724	9.37381	5.88898	3.32267	2.58272e-26	2.21072e-23	633.86	693.01	70.93	47.59
chr14	77679635	77680084	450	*	7.52193	8.42608	4.56237	3.65051	2.7329e-26	2.33048e-23	314.76	373.16	19.95	27.3
chr15	91801392	91802075	684	*	7.6461	8.53393	4.90541	3.44817	2.74461e-26	2.33169e-23	381.48	359.83	30.29	29.65
chr16	84047438	84048288	851	*	9.23183	10.0848	6.8646	3.09205	2.87946e-26	2.43713e-23	1080.61	1091.34	101.22	131.84
chr4	145370529	145371292	764	*	7.81935	8.70932	5.05191	3.47459	3.20151e-26	2.69963e-23	401.78	435.35	27.34	39.01
chr5	68134770	68135411	642	*	8.84668	6.04205	9.73956	-3.50631	3.36593e-26	2.82777e-23	71.07	60.71	690.1	1019.63
chr9	124941737	124942371	635	*	7.98558	8.85794	5.42365	3.27938	3.96638e-26	3.31992e-23	448.2	479.77	41.38	44.47
chr2	97564821	97565313	493	*	7.82654	8.70614	5.18399	3.35433	4.25101e-26	3.54508e-23	419.19	416.1	39.16	33.55
chr3	55497542	55499162	1621	*	8.72831	5.80063	9.63024	-3.61833	4.31902e-26	3.5886e-23	50.77	60.71	619.17	965.8
chr12	13755019	13755526	508	*	7.43636	8.34031	4.47977	3.6421	4.51947e-26	3.74145e-23	301.7	346.5	25.12	19.5
chr19	39055466	39056531	1066	*	8.55954	9.41909	6.1292	3.15119	4.63509e-26	3.81962e-23	664.32	704.85	77.58	62.41
chr5	65807306	65807751	446	*	6.819	7.77965	2.60312	4.68222	4.64758e-26	3.81962e-23	227.73	211.75	5.91	6.24
chr3	192127042	192128266	1225	*	8.5178	9.3986	5.86123	3.36621	5.36084e-26	4.3899e-23	596.15	753.72	69.45	46.81
chr12	117780314	117780941	628	*	7.94716	8.8299	5.26784	3.38721	5.43994e-26	4.43866e-23	452.55	457.56	45.07	31.99
chr20	48860970	48861329	360	*	7.55847	8.48019	4.31543	3.89049	5.55854e-26	4.51918e-23	332.16	382.04	27.34	12.48
chr10	31460458	31461329	872	*	8.19068	5.22483	9.09527	-3.6517	5.71733e-26	4.63167e-23	34.81	39.98	472.14	621.77
chr13	63217064	63217531	468	*	7.00295	7.9686	2.59329	4.81814	6.48446e-26	5.23444e-23	190.01	310.96	7.39	4.68
chr2	233791618	233793334	1717	*	9.23338	10.0742	6.97485	2.98179	6.57703e-26	5.29033e-23	1063.21	1092.82	133	118.58
chr11	98891145	98892083	939	*	8.84211	9.70457	6.38309	3.17986	6.70038e-26	5.37051e-23	783.26	885.51	70.19	96.74
chr19	36449783	36450775	993	*	9.20893	10.0504	6.94442	2.98827	6.80226e-26	5.43297e-23	1047.25	1073.57	115.26	131.06
chr1	6514268	6515922	1655	*	9.51625	10.3552	7.27345	2.96634	7.47474e-26	5.94913e-23	1267.72	1351.96	144.82	164.61
chr8	63161087	63162191	1105	*	8.25057	9.11428	5.77897	3.18971	8.70486e-26	6.90396e-23	529.43	578.99	59.11	50.71
chr10	16423117	16423583	467	*	7.41875	8.31581	4.55858	3.55511	9.14408e-26	7.22704e-23	327.81	309.48	22.17	24.96
chr12	71137906	71138342	437	*	7.29919	8.21906	4.08886	3.8626	9.67305e-26	7.61857e-23	250.93	345.02	19.21	14.82
chr2	2617077	2617718	642	*	8.73714	9.58296	6.43463	3.02485	1.00329e-25	7.86566e-23	790.51	743.35	87.19	85.81
chr22	39637944	39639153	1210	*	8.98409	9.82818	6.69688	3.01	1.00561e-25	7.86566e-23	867.39	950.66	98.27	109.22
chr14	37130837	37131482	646	*	9.1303	9.99867	6.61076	3.2371	1.04289e-25	8.12924e-23	1008.09	1038.03	76.1	119.36
chr7	151493399	151494551	1153	*	8.63474	9.48409	6.30054	3.05535	1.23058e-25	9.55937e-23	691.88	740.39	82.75	74.89
chr1	67933861	67934405	545	*	8.26454	9.13036	5.77141	3.20981	1.34611e-25	1.04211e-22	501.87	618.97	55.41	53.83
chr1	91183151	91184606	1456	*	8.95986	9.80977	6.62066	3.05975	1.42217e-25	1.09725e-22	836.93	958.07	107.87	88.94
chr5	140305792	140307020	1229	*	9.28014	10.1265	6.973	3.0292	1.44354e-25	1.10997e-22	1079.16	1156.49	110.83	140.42
chr12	7736718	7737100	383	*	6.90032	7.8415	3.25479	4.23113	1.60605e-25	1.23075e-22	227.73	231	7.39	11.7
chr17	42312249	42313291	1043	*	8.6131	9.45972	6.30356	3.03086	1.72207e-25	1.31522e-22	706.39	701.89	76.84	81.13
chr11	130381662	130382049	388	*	7.44932	8.34198	4.64751	3.49917	1.73847e-25	1.32328e-22	336.51	312.45	24.38	25.74
chr2	177042585	177043972	1388	*	8.28385	9.14491	5.83867	3.16269	1.76271e-25	1.33725e-22	525.08	607.12	59.85	54.61
chr17	9773316	9773730	415	*	8.03409	4.45742	8.97232	-4.16945	1.80529e-25	1.36499e-22	23.21	20.73	367.96	636.59
chr1	1009046	1009334	289	*	7.19276	8.10223	4.15353	3.71062	2.02512e-25	1.52611e-22	272.69	276.91	19.21	16.38
chr7	54731750	54732612	863	*	9.50403	10.3374	7.30768	2.91767	2.08373e-25	1.56508e-22	1317.04	1270.51	151.47	165.39
chr7	149473318	149473797	480	*	7.88516	8.75912	5.30582	3.29186	2.10816e-25	1.57821e-22	411.94	454.6	36.2	42.91
chr2	175199481	175199906	426	*	8.14674	9.01282	5.65107	3.21236	2.11894e-25	1.58106e-22	517.82	515.31	44.33	56.17
chr2	135441079	135441707	629	*	7.04218	7.96511	3.77739	3.91028	2.1404e-25	1.59183e-22	248.03	251.73	11.82	15.6
chr15	81089595	81090375	781	*	9.17593	6.59615	10.0499	-3.29119	2.26637e-25	1.68001e-22	94.28	99.21	871.12	1248.99
chr8	21418714	21419160	447	*	6.92161	7.85972	3.34781	4.16202	2.27817e-25	1.68326e-22	232.08	232.48	12.56	7.8
chr6	39261926	39262278	353	*	7.5404	8.43165	4.75673	3.48274	2.31088e-25	1.70188e-22	329.26	361.31	23.64	30.43
chr15	81151221	81151632	412	*	7.79106	4.01231	8.73752	-4.33185	2.40438e-25	1.76501e-22	14.5	17.77	331.75	521.91
chr7	26497272	26497698	427	*	6.94231	7.87893	3.40205	4.13488	2.43776e-25	1.78374e-22	217.57	253.21	12.56	8.58
chr7	44190093	44190492	400	*	8.04793	8.9582	4.99628	3.71826	2.50697e-25	1.82545e-22	512.02	482.74	44.33	19.5
chr4	596292	596841	550	*	7.87948	8.77039	5.10011	3.47428	2.51086e-25	1.82545e-22	440.95	432.39	42.85	25.74
chr8	108344506	108345175	670	*	8.35543	5.38677	9.2602	-3.64859	2.81662e-25	2.04009e-22	34.81	48.87	502.43	723.96
chr7	51383067	51385267	2201	*	9.61741	10.4591	7.35115	2.9871	2.82408e-25	2.04009e-22	1330.1	1485.23	145.56	180.99
chr1	2374795	2375770	976	*	8.66973	9.5129	6.39049	2.99966	2.86008e-25	2.05954e-22	726.69	734.47	82.75	85.03
chr3	140007427	140007906	480	*	7.22578	8.13347	4.21383	3.68507	2.87228e-25	2.06178e-22	263.99	297.64	19.95	17.16
chr19	35911191	35911815	625	*	7.26452	8.1826	4.08536	3.82963	2.8846e-25	2.06409e-22	324.91	256.18	20.69	13.26
chr11	14991408	14991866	459	*	7.57322	8.45786	4.87143	3.40567	2.91979e-25	2.0827e-22	361.17	342.06	27.34	31.21
chr11	1567748	1568995	1248	*	10.6465	11.4816	8.43518	2.93195	3.02475e-25	2.1508e-22	2741.42	2977.86	302.2	390.07
chr5	146778196	146778826	631	*	9.0271	6.23962	9.91865	-3.48396	3.08758e-25	2.18862e-22	66.72	84.4	750.69	1185.02
chr6	40139028	40139563	536	*	7.10952	8.05367	3.39074	4.2735	3.32433e-25	2.3491e-22	293	238.41	15.52	5.46
chrX	37430626	37431892	1267	*	7.5416	8.42874	4.80939	3.43175	3.36635e-25	2.37141e-22	324.91	364.27	29.55	26.52
chr12	115575901	115576404	504	*	8.32317	5.27973	9.23291	-3.71321	3.60192e-25	2.5295e-22	37.71	39.98	466.96	736.45
chr16	27732761	27733542	782	*	9.41485	6.72104	10.2988	-3.39641	3.79463e-25	2.6566e-22	107.34	103.65	959.05	1560.27
chr3	89163227	89164067	841	*	9.22287	10.0638	6.9633	2.97984	3.82578e-25	2.67017e-22	1024.04	1116.51	113.05	136.52
chr16	19016795	19017445	651	*	7.57439	8.45929	4.8694	3.40689	3.9663e-25	2.75975e-22	327.81	376.12	28.82	29.65
chr9	134709153	134709759	607	*	7.49547	8.38376	4.749	3.4442	3.98458e-25	2.76399e-22	345.22	322.81	28.82	24.96
chr10	129680921	129681481	561	*	7.35215	8.24817	4.50609	3.53511	4.04254e-25	2.79565e-22	307.5	300.6	24.38	21.06
chr6	87646622	87647676	1055	*	8.1319	8.99635	5.65279	3.19259	4.05706e-25	2.79716e-22	512.02	509.39	56.15	44.47
chr13	112717141	112717586	446	*	7.17779	8.08596	4.15854	3.69211	4.12878e-25	2.83798e-22	284.3	259.14	16.99	18.72
chr1	161409943	161410649	707	*	9.6739	10.5254	7.31981	3.07296	4.30035e-25	2.94699e-22	1438.88	1508.92	131.52	188.01
chr3	50664711	50665467	757	*	10.8122	11.6393	8.66566	2.86584	4.68245e-25	3.19917e-22	3156.26	3223.67	362.04	450.14
chr2	189163697	189164182	486	*	7.10449	8.01871	3.98983	3.77248	4.92584e-25	3.35535e-22	263.99	254.7	17.73	14.04
chr15	39877593	39877892	300	*	8.7641	6.0096	9.65304	-3.45127	5.01509e-25	3.40592e-22	69.62	59.23	642.07	968.14
chr3	13276093	13276557	465	*	6.87413	7.8096	3.35946	4.11427	5.03684e-25	3.41048e-22	211.77	236.93	9.61	10.92
chr17	69966401	69966805	405	*	7.12866	8.04222	4.02482	3.7634	5.1009e-25	3.44358e-22	281.39	245.81	17.73	14.82
chr10	118912182	118912643	462	*	7.50211	8.39261	4.72792	3.46863	5.18725e-25	3.49148e-22	361.17	310.96	28.82	24.18
chr6	163759874	163760454	581	*	7.39881	8.29251	4.58351	3.50864	5.39442e-25	3.62018e-22	320.56	306.52	21.43	26.52
chr5	141824702	141825246	545	*	7.60015	8.50261	4.66511	3.61395	5.64675e-25	3.77834e-22	293	432.39	27.34	23.4
chr5	180045568	180046494	927	*	9.04523	9.88443	6.80012	2.96392	5.71868e-25	3.81522e-22	880.44	1009.9	116	106.88
chr5	128796653	128797513	861	*	8.86662	9.7161	6.53132	3.05389	5.76459e-25	3.83457e-22	780.36	901.8	82.01	102.98
chr3	37499946	37500377	432	*	7.64248	8.53257	4.87347	3.46603	5.92915e-25	3.9325e-22	414.84	325.77	25.86	32.77
chr10	102607032	102607709	678	*	8.01126	8.89234	5.35153	3.36531	5.99456e-25	3.96429e-22	439.5	510.87	32.51	49.15
chr3	126084903	126085552	650	*	8.29253	9.16167	5.76486	3.23733	6.43896e-25	4.2458e-22	600.5	544.93	64.28	44.47
chr15	81232504	81233523	1020	*	8.5775	5.6791	9.47735	-3.5809	6.74717e-25	4.43614e-22	56.57	45.9	553.41	872.19
chr7	155174193	155175041	849	*	8.31045	9.16069	5.96825	3.05953	7.00194e-25	4.59034e-22	567.14	577.51	62.8	62.41
chr15	75475097	75475580	484	*	7.72149	8.60569	5.02482	3.39596	7.26045e-25	4.7461e-22	343.77	435.35	35.47	29.65
chr2	11225	11975	751	*	7.5661	8.46522	4.67796	3.57498	7.48241e-25	4.87713e-22	330.71	376.12	19.21	31.99
chr5	32190200	32190700	501	*	8.4249	5.68166	9.31293	-3.44015	7.60201e-25	4.93581e-22	47.87	54.79	537.16	734.89
chr4	13324019	13324792	774	*	8.06517	5.00824	8.97578	-3.72072	7.61595e-25	4.93581e-22	37.71	26.65	422.63	584.32
chr18	43913375	43914342	968	*	8.67792	9.52325	6.37984	3.01527	8.06291e-25	5.21059e-22	719.44	752.24	90.88	75.67
chr6	27197923	27198560	638	*	7.44603	8.33504	4.69058	3.45133	8.26849e-25	5.32827e-22	343.77	302.08	25.12	26.52
chr12	3420178	3420457	280	*	7.00213	7.92576	3.72454	3.90909	8.54451e-25	5.49054e-22	253.83	232.48	15.52	10.92
chr1	1369221	1369535	315	*	7.77595	8.6526	5.16677	3.31338	8.83428e-25	5.64663e-22	387.28	417.58	40.64	31.21
chr4	38936870	38937655	786	*	8.66057	5.61873	9.5702	-3.70821	8.83722e-25	5.64663e-22	44.97	53.31	546.76	973.61
chr2	218178307	218179325	1019	*	9.20967	6.58643	10.0876	-3.32827	8.95437e-25	5.70542e-22	85.58	106.62	873.34	1302.82
chr5	75378686	75379463	778	*	8.83997	9.68749	6.52231	3.03496	9.3136e-25	5.91768e-22	731.04	918.09	88.66	95.18
chr14	33078133	33078508	376	*	7.22544	8.12506	4.3303	3.57713	1.01672e-24	6.44201e-22	278.49	279.87	19.95	20.28
chr4	47034439	47035114	676	*	8.08207	8.97056	5.33319	3.44155	1.04738e-24	6.61776e-22	456.9	546.41	50.98	29.65
chr16	1701028	1702380	1353	*	8.17549	9.03584	5.73738	3.15057	1.11392e-24	7.01867e-22	501.87	547.89	59.11	47.59
chrX	48693188	48694446	1259	*	7.80689	8.67501	5.29	3.22736	1.13665e-24	7.14204e-22	422.09	395.37	37.68	40.57
chr15	81089034	81089507	474	*	7.86106	4.25311	8.80065	-4.1843	1.20533e-24	7.55264e-22	17.41	20.73	332.49	559.36
chr7	26415689	26417111	1423	*	8.68882	9.52925	6.43326	2.97259	1.21932e-24	7.6193e-22	709.29	768.53	90.14	82.69
chr2	130559104	130559553	450	*	8.40381	9.2746	5.85876	3.25511	1.22563e-24	7.63763e-22	601.95	636.74	45.07	70.99
chr11	68847612	68848390	779	*	9.04478	9.87566	6.86838	2.8937	1.27617e-24	7.9308e-22	932.66	946.22	118.22	115.46
chr15	81113915	81115284	1370	*	8.99017	6.28113	9.87541	-3.40697	1.28402e-24	7.95778e-22	68.17	87.37	740.34	1138.21
chr20	61454129	61454432	304	*	7.4223	8.31815	4.57853	3.52934	1.29886e-24	8.02785e-22	278.49	359.83	24.38	23.4
chr5	180486120	180486929	810	*	7.82385	8.69545	5.27016	3.26022	1.33314e-24	8.21731e-22	430.79	398.33	42.85	34.33
chr15	89910657	89911477	821	*	8.27368	9.12791	5.89449	3.09338	1.4323e-24	8.80464e-22	522.17	596.76	62.8	56.17
chr9	89298769	89299532	764	*	7.94503	4.13897	8.89251	-4.34148	1.44247e-24	8.84314e-22	14.5	20.73	330.27	620.21
chr7	47369188	47369589	402	*	7.49828	8.39378	4.65923	3.52206	1.48166e-24	9.05894e-22	335.06	337.62	31.03	19.5
chr20	21683476	21684224	749	*	7.76784	8.66457	4.91225	3.53665	1.48912e-24	9.08007e-22	420.64	390.93	39.16	21.06
chr13	112722275	112723191	917	*	7.90978	8.80444	5.08185	3.51174	1.49916e-24	9.11678e-22	435.15	459.04	44.33	23.4
chr5	3602288	3603348	1061	*	8.27961	9.15435	5.69168	3.29148	1.50891e-24	9.15152e-22	523.63	616.01	62.8	40.57
chr4	156487495	156488044	550	*	8.84848	5.99293	9.7452	-3.53933	1.51588e-24	9.16928e-22	69.62	57.75	639.86	1076.58
chr8	27788696	27789190	495	*	7.77283	8.65487	5.10192	3.37302	1.52245e-24	9.18453e-22	397.43	408.7	27.34	41.35
chr16	56377865	56378468	604	*	7.70526	8.58085	5.1079	3.3015	1.58734e-24	9.55064e-22	413.39	352.43	36.2	32.77
chr2	20431314	20431821	508	*	9.48064	10.3415	7.03734	3.15643	1.61265e-24	9.67721e-22	1315.59	1279.4	101.22	161.49
chr4	37443004	37443655	652	*	7.46648	8.38423	4.29297	3.81635	1.65322e-24	9.89447e-22	263.99	404.25	24.38	14.82
chr14	48144492	48145686	1195	*	8.13667	9.01029	5.56104	3.2796	1.76698e-24	1.05475e-21	462.7	568.62	55.41	39.01
chr12	33049291	33050301	1011	*	8.74238	9.58274	6.48742	2.97184	1.78154e-24	1.06065e-21	731.04	802.59	83.49	95.96
chr7	149332682	149333459	778	*	7.32213	8.22155	4.42981	3.57019	1.84243e-24	1.09403e-21	272.69	324.29	24.38	18.72
chr10	89854967	89855497	531	*	8.84641	6.09085	9.73544	-3.44807	1.87536e-24	1.11068e-21	66.72	69.6	651.68	1053.18
chr3	30687960	30688504	545	*	8.51161	5.45593	9.42214	-3.71591	1.89995e-24	1.12231e-21	50.77	37.02	506.12	865.95
chr3	122640580	122641423	844	*	8.84699	9.68518	6.61039	2.95262	1.93164e-24	1.13807e-21	857.24	789.26	104.92	90.5
chr17	26860037	26860802	766	*	8.42656	9.27199	6.12753	3.01514	1.94639e-24	1.14379e-21	638.21	598.24	66.5	73.33
chr8	8610498	8610949	452	*	8.21371	9.07002	5.81469	3.11294	2.05412e-24	1.20397e-21	572.94	501.99	51.72	60.85
chr12	115746582	115747172	591	*	8.15108	4.83808	9.0766	-3.93703	2.31905e-24	1.35575e-21	26.11	31.1	388.64	691.2
chr13	58204822	58205149	328	*	7.42207	8.30896	4.69289	3.42436	2.32536e-24	1.35595e-21	330.71	303.56	23.64	28.08
chr10	102503357	102504004	648	*	8.16219	9.02664	5.68313	3.18963	2.3729e-24	1.38012e-21	467.06	576.03	45.81	56.95
chr6	27300477	27301381	905	*	8.54596	9.41807	5.98664	3.26655	2.39092e-24	1.38705e-21	639.66	728.55	48.03	78.79
chr5	52786520	52787055	536	*	8.62954	5.7436	9.5285	-3.5659	2.41563e-24	1.3978e-21	44.97	62.19	568.19	908.85
chr5	31663577	31664086	510	*	7.32897	8.22512	4.48111	3.52962	2.4651e-24	1.4228e-21	272.69	325.77	24.38	20.28
chr19	39468618	39468908	291	*	6.91686	7.85502	3.34195	4.14565	2.56983e-24	1.47948e-21	233.53	229.52	14.04	6.24
chr10	83633855	83635339	1485	*	8.4199	9.27794	6.00423	3.12778	2.62327e-24	1.50643e-21	535.23	706.33	62.06	66.31
chr2	89101546	89102086	541	*	7.25374	8.14768	4.43532	3.50418	2.70201e-24	1.54773e-21	281.39	285.79	21.43	21.84
chr9	1051375	1052314	940	*	8.88646	9.72241	6.66862	2.93354	2.82553e-24	1.6144e-21	781.81	907.72	100.49	102.98
chr4	26041372	26042180	809	*	9.23753	6.54244	10.1216	-3.39086	3.36356e-24	1.91699e-21	78.33	108.1	865.21	1362.89
chr15	81093197	81093940	744	*	8.76284	5.96039	9.65555	-3.48833	3.51019e-24	1.99554e-21	63.82	60.71	605.87	1007.15
chr1	23279539	23280620	1082	*	8.73304	9.56704	6.53129	2.91656	3.81364e-24	2.16263e-21	745.55	771.49	96.05	88.94
chr10	131770732	131771658	927	*	9.11442	9.94132	6.96968	2.8597	3.98485e-24	2.25408e-21	997.93	968.43	121.17	129.5
chr4	85420294	85420854	561	*	9.63951	10.4785	7.39598	2.95872	4.09101e-24	2.30838e-21	1415.67	1437.84	142.6	194.25
chr4	149883796	149884487	692	*	7.93322	8.81464	5.26946	3.36271	4.5551e-24	2.56387e-21	414.84	485.7	29.55	47.59
chr1	37499588	37500680	1093	*	8.40421	9.26212	5.98983	3.12382	4.77763e-24	2.68246e-21	545.38	682.64	70.93	56.17
chr17	76964089	76964403	315	*	7.08508	8.01778	3.62959	4.04433	4.80934e-24	2.6936e-21	279.94	238.41	17.73	7.02
chr18	4454685	4455712	1028	*	7.83421	8.69566	5.38519	3.15831	5.18262e-24	2.89551e-21	424.99	404.25	39.9	43.69
chr8	109815121	109815599	479	*	6.68039	7.64281	2.39923	4.68271	5.53965e-24	3.08738e-21	217.57	182.14	6.65	3.9
chr12	39538927	39539540	614	*	7.43426	8.31575	4.76978	3.35978	5.55367e-24	3.08761e-21	329.26	308	28.82	25.74
chr9	106994893	106995680	788	*	7.58368	8.46207	4.95493	3.32577	5.61669e-24	3.11501e-21	333.61	371.68	34.73	27.3
chr2	218151578	218152267	690	*	8.19029	5.19598	9.0968	-3.658	5.84389e-24	3.23311e-21	34.81	38.5	423.37	671.69
chr10	61751326	61751987	662	*	7.90536	8.76374	5.48643	3.12897	5.90445e-24	3.25867e-21	420.64	448.68	42.85	46.81
chrX	128979676	128980094	419	*	7.35228	8.25025	4.47977	3.54776	6.03623e-24	3.32331e-21	265.44	343.54	25.12	19.5
chr19	42210613	42211255	643	*	8.42099	9.26694	6.11732	3.01629	6.31563e-24	3.46872e-21	561.34	670.8	70.19	68.65
chr11	133848590	133849145	556	*	7.56651	8.45109	4.86532	3.39263	6.39374e-24	3.50314e-21	306.05	393.89	31.77	26.52
chr5	71227911	71229218	1308	*	8.19095	9.05314	5.73459	3.16271	6.43317e-24	3.51625e-21	533.78	528.64	62.8	43.69
chr3	127244185	127244680	496	*	7.79288	8.66199	5.26559	3.23309	6.52599e-24	3.55841e-21	419.19	390.93	33.25	43.69
chr7	70596163	70597769	1607	*	8.46013	9.32404	5.98655	3.17913	6.58767e-24	3.58342e-21	590.35	691.53	76.1	50.71
chr5	36298577	36299073	497	*	7.81819	4.50717	8.74361	-3.92981	6.63335e-24	3.59964e-21	20.31	25.17	336.92	520.35
chr1	171261769	171262499	731	*	8.43276	5.57366	9.32975	-3.53695	6.75487e-24	3.64822e-21	47.87	47.39	493.56	793.4
chr17	32947423	32947876	454	*	7.61933	8.52538	4.63199	3.64686	6.75505e-24	3.64822e-21	378.58	358.35	33.99	15.6
chr7	32623336	32623785	450	*	9.28482	6.71213	10.1582	-3.27422	7.00397e-24	3.77368e-21	98.63	111.06	888.86	1396.44
chr5	177758322	177759158	837	*	7.71398	8.5879	5.1351	3.27818	7.03373e-24	3.78073e-21	375.68	393.89	40.64	29.65
chr9	29211671	29212530	860	*	8.01272	8.87791	5.52613	3.19111	7.23135e-24	3.87776e-21	467.06	473.85	53.94	38.23
chr16	17605161	17605736	576	*	8.80253	6.18073	9.6803	-3.3198	7.26311e-24	3.88561e-21	72.52	72.56	650.94	989.99
chr11	134945595	134946135	541	*	7.3391	8.23079	4.54971	3.4715	7.57389e-24	4.04233e-21	301.7	299.12	27.34	19.5
chr2	219866932	219868235	1304	*	9.11929	9.95306	6.91945	2.91391	7.6129e-24	4.05362e-21	1008.09	974.36	107.14	134.96
chr7	132467485	132468108	624	*	9.32991	6.79062	10.2002	-3.24244	7.82785e-24	4.15831e-21	104.43	116.98	923.58	1429.2
chr4	184545711	184546089	379	*	7.07575	7.98176	4.08886	3.64804	7.85689e-24	4.16398e-21	253.83	251.73	19.21	14.82
chr1	156316414	156317508	1095	*	9.30324	6.7115	10.1783	-3.29146	8.10554e-24	4.28575e-21	102.98	106.62	885.9	1431.54
chr18	10299615	10300214	600	*	8.71228	6.00926	9.59701	-3.39391	8.63091e-24	4.55293e-21	71.07	57.75	608.83	940.06
chr10	30654023	30654534	512	*	7.5162	8.39132	4.92407	3.29163	8.69009e-24	4.56537e-21	319.11	352.43	30.29	30.43
chr11	126784742	126785201	460	*	8.27418	5.33153	9.17717	-3.60998	8.70552e-24	4.56537e-21	43.51	37.02	445.54	712.26
chr5	131406303	131406844	542	*	8.39773	9.24221	6.10703	3.00233	8.71489e-24	4.56537e-21	571.49	639.7	73.89	63.97
chr1	164694562	164695109	548	*	8.2161	5.19657	9.12429	-3.67834	9.07498e-24	4.74306e-21	33.36	39.98	423.37	692.76
chr1	111400845	111401186	342	*	6.94738	7.88235	3.44342	4.0795	9.18868e-24	4.79001e-21	234.98	236.93	15.52	6.24
chr9	135086134	135086500	367	*	7.8486	8.71348	5.36518	3.18766	9.20705e-24	4.79001e-21	427.89	411.66	46.55	35.89
chr1	17019045	17020826	1782	*	10.0981	10.9132	8.04302	2.76676	9.2781e-24	4.81593e-21	1942.2	1914.66	277.07	250.42
chr11	7176274	7176700	427	*	7.14777	8.07396	3.82208	3.94351	9.3983e-24	4.86718e-21	216.12	322.81	10.34	17.94
chr6	27636304	27637316	1013	*	9.29123	10.1352	7.00541	2.99851	9.84886e-24	5.0889e-21	1071.91	1177.22	106.4	150.57
chr14	29243122	29244250	1129	*	8.26434	9.10762	5.98424	2.99185	1.00602e-23	5.1863e-21	561.34	541.97	65.76	60.85
chr1	17053690	17054457	768	*	8.77232	9.66425	5.97996	3.47307	1.06308e-23	5.468e-21	787.61	835.16	86.45	39.79
chr9	1050054	1050619	566	*	8.69901	9.53081	6.5152	2.89664	1.07609e-23	5.52242e-21	774.56	704.85	90.88	92.06
chr16	3233911	3234429	519	*	8.43025	9.28187	6.07537	3.06602	1.08309e-23	5.54581e-21	586	658.95	57.63	77.23
chr10	73823256	73823755	500	*	7.82592	8.71923	5.01565	3.4879	1.1003e-23	5.6212e-21	409.04	433.87	42.85	21.84
chr17	65514846	65515353	508	*	8.19549	5.30476	9.09479	-3.56269	1.1092e-23	5.65378e-21	43.51	35.54	436.67	656.87
chr10	101123825	101124216	392	*	7.64237	4.35675	8.56643	-3.904	1.11166e-23	5.65378e-21	23.21	17.77	322.88	435.31
chr4	44449477	44451334	1858	*	9.88177	10.7093	7.73228	2.86233	1.12135e-23	5.68915e-21	1541.87	1806.56	193.58	231.7
chr4	184718183	184719755	1573	*	9.44999	10.275	7.31979	2.84302	1.12363e-23	5.68915e-21	1240.17	1237.94	145.56	173.97
chr7	45279074	45279494	421	*	8.41897	9.25761	6.1787	2.95234	1.16193e-23	5.87e-21	587.45	636.74	73.89	70.99
chr9	138790465	138791160	696	*	7.78423	4.55153	8.70538	-3.86011	1.1655e-23	5.87103e-21	23.21	23.69	333.23	501.63
chr13	41990399	41990837	439	*	7.72241	3.7971	8.67413	-4.4154	1.16937e-23	5.87103e-21	15.96	11.85	290.37	526.59
chr17	18872729	18873317	589	*	7.70494	8.57057	5.21383	3.19475	1.1699e-23	5.87103e-21	390.18	370.2	39.9	34.33
chr3	171978109	171978651	543	*	7.9942	4.79474	8.91346	-3.83003	1.17379e-23	5.87753e-21	36.26	19.25	388.64	575.74
chr5	137805423	137806836	1414	*	10.0246	7.55211	10.8884	-3.1778	1.19341e-23	5.96262e-21	178.41	196.94	1460	2331.04
chr14	104582611	104584363	1753	*	8.99605	9.83447	6.7575	2.9501	1.21161e-23	6.04021e-21	841.28	984.72	120.44	95.96
chr15	22460919	22461901	983	*	7.86786	8.75292	5.16096	3.39392	1.24771e-23	6.20656e-21	448.2	414.62	45.81	25.74
chr1	147196034	147196542	509	*	7.39061	8.27185	4.72904	3.35409	1.30108e-23	6.45786e-21	322.01	296.16	28.08	24.96
chr7	6570522	6571145	624	*	7.57966	8.45221	5.01574	3.26521	1.31376e-23	6.5066e-21	351.02	349.47	28.82	35.89
chr21	43894152	43894838	687	*	7.83361	8.6935	5.40001	3.14113	1.39792e-23	6.9083e-21	413.39	414.62	38.42	46.03
chr11	114548732	114549486	755	*	7.75015	8.61295	5.28772	3.16738	1.42819e-23	7.04258e-21	368.42	414.62	39.9	38.23
chr1	56559857	56560223	367	*	7.77975	4.4059	8.70843	-3.97511	1.51878e-23	7.47302e-21	26.11	16.29	329.53	507.09
chr16	77530824	77531262	439	*	6.67429	7.61706	2.98983	4.22566	1.52333e-23	7.4792e-21	201.62	191.02	8.87	7.02
chr11	1569069	1569966	898	*	9.69522	10.5358	7.4386	2.96848	1.55814e-23	7.63357e-21	1415.67	1553.34	143.34	203.61
chr1	214155964	214156891	928	*	8.7502	9.5794	6.5872	2.87513	1.63512e-23	7.99345e-21	758.6	771.49	90.88	101.42
chr1	77248465	77248962	498	*	8.14492	5.1641	9.05052	-3.64048	1.64495e-23	8.02419e-21	40.61	31.1	413.76	646.73
chr20	57828833	57829457	625	*	7.22705	8.11723	4.45704	3.45209	1.66467e-23	8.10298e-21	281.39	273.95	23.64	20.28
chr18	46545826	46546134	309	*	7.19484	8.08636	4.40767	3.46808	1.66859e-23	8.10467e-21	277.04	266.54	22.17	20.28
chr15	44947106	44947484	379	*	7.966	5.03973	8.86784	-3.59155	1.72055e-23	8.33918e-21	40.61	25.17	409.33	525.03
chr10	101292449	101292749	301	*	7.38094	8.26684	4.66394	3.40311	1.77903e-23	8.60426e-21	282.84	333.18	28.08	22.62
chr8	56014396	56015847	1452	*	8.87926	9.70543	6.74017	2.85033	1.84737e-23	8.91577e-21	806.47	863.3	110.83	102.98
chr6	13279108	13279714	607	*	8.62246	5.87159	9.51111	-3.43474	1.85244e-23	8.92126e-21	65.27	51.83	563.75	895.59
chr6	27694389	27694803	415	*	6.80125	7.74176	3.17166	4.17583	1.86326e-23	8.95437e-21	205.97	222.12	12.56	5.46
chr15	75280331	75280697	367	*	7.30709	8.19887	4.51653	3.47379	1.95494e-23	9.37507e-21	293	294.68	18.47	27.3
chr19	47263052	47263672	621	*	9.08476	6.59547	9.95021	-3.19205	1.97602e-23	9.45617e-21	98.63	94.77	794.28	1184.24
chr15	81176068	81176766	699	*	7.81549	4.79867	8.72349	-3.67147	2.02735e-23	9.68139e-21	29.01	26.65	353.92	491.48
chr4	3645020	3645314	295	*	6.93587	7.85107	3.80514	3.76762	2.06482e-23	9.8396e-21	223.37	238.41	16.26	11.7
chr12	328893	329449	557	*	8.66883	9.49694	6.51455	2.86546	2.09155e-23	9.92161e-21	716.54	728.55	92.36	90.5
chr17	29956913	29957569	657	*	9.0109	6.56264	9.87228	-3.15292	2.09442e-23	9.92161e-21	94.28	94.77	771.38	1103.11
chr3	35680464	35681685	1222	*	8.68857	9.52266	6.4861	2.9138	2.09515e-23	9.92161e-21	677.38	793.7	86.45	92.84
chr19	42390816	42391220	405	*	7.72119	8.59592	5.1334	3.28242	2.14474e-23	1.01353e-20	382.93	390.93	42.12	28.08
chr1	38218231	38219038	808	*	8.99241	9.81573	6.87547	2.82808	2.24469e-23	1.05856e-20	906.55	895.88	111.57	123.26
chr9	119405960	119406758	799	*	8.45966	5.7019	9.34886	-3.44083	2.31527e-23	1.08958e-20	49.32	54.79	507.6	796.52
chr7	155249606	155250924	1319	*	9.4948	10.3179	7.37988	2.82594	2.36283e-23	1.10965e-20	1209.7	1343.07	153.68	179.43
chr7	114565518	114565849	332	*	7.70891	4.36207	8.63621	-3.95304	2.41096e-23	1.12992e-20	15.96	25.17	320.67	475.1
chr16	75517086	75517512	427	*	7.23775	8.13393	4.38946	3.52404	2.55395e-23	1.19447e-20	255.29	306.52	17.73	24.18
chr7	20826459	20826931	473	*	7.6867	8.54856	5.23366	3.15755	2.61293e-23	1.21953e-20	374.23	374.64	35.47	39.79
chr5	126951432	126952048	617	*	8.35278	5.79828	9.22445	-3.25225	2.69574e-23	1.2556e-20	59.47	51.83	523.12	673.25
chr1	30374337	30375089	753	*	7.56049	8.46089	4.65451	3.56903	2.7199e-23	1.26426e-20	361.17	343.54	33.99	16.38
chr7	73866627	73866909	283	*	7.65946	8.52579	5.16104	3.20108	2.75391e-23	1.27745e-20	368.42	368.72	31.77	39.79
chr8	28226713	28227126	414	*	7.95137	8.80219	5.60373	3.05571	2.86575e-23	1.32661e-20	430.79	462	46.55	50.71
chr5	142252308	142252688	381	*	7.34221	8.22417	4.67213	3.36107	2.92266e-23	1.3502e-20	291.55	306.52	22.9	28.08
chr17	71948428	71949393	966	*	8.38678	9.22249	6.17091	2.92591	2.93153e-23	1.35155e-20	578.74	616.01	73.89	70.21
chr11	117755618	117756168	551	*	7.14769	8.03941	4.35801	3.46873	3.2232e-23	1.48301e-20	259.64	266.54	19.95	21.06
chr16	49910135	49911029	895	*	8.3846	9.22887	6.09584	2.99785	3.362e-23	1.54373e-20	538.13	661.91	65.02	71.77
chr4	94749395	94750696	1302	*	9.10474	9.93883	6.90223	2.91309	3.4819e-23	1.59556e-20	947.17	1015.82	102.7	136.52
chr15	81099689	81100866	1178	*	9.44401	6.74502	10.3284	-3.38615	3.50355e-23	1.60225e-20	79.78	134.75	1015.94	1555.58
chr13	33583021	33583765	745	*	7.5738	3.55711	8.52854	-4.47857	3.5699e-23	1.6293e-20	7.25	16.29	283.72	454.82
chr12	50936185	50936589	405	*	7.3632	8.24372	4.70994	3.34338	3.58387e-23	1.63239e-20	326.36	279.87	26.6	25.74
chr22	33453704	33454620	917	*	7.92047	8.77946	5.49563	3.12846	3.77879e-23	1.71773e-20	390.18	488.66	46.55	43.69
chr13	103683560	103684165	606	*	7.99347	4.7971	8.91255	-3.82198	3.80378e-23	1.72563e-20	31.91	23.69	357.61	606.16
chr2	95691130	95691956	827	*	8.45275	9.28473	6.26749	2.89507	3.84422e-23	1.74049e-20	609.2	638.22	76.84	77.23
chr10	117416723	117417342	620	*	6.86955	7.80414	3.37389	4.07792	3.89438e-23	1.7597e-20	221.92	225.08	5.91	14.82
chr6	132468568	132469331	764	*	9.31751	6.92675	10.173	-3.09606	3.91789e-23	1.7668e-20	118.94	124.39	942.05	1366.79
chr14	61456242	61456705	464	*	7.90968	4.84037	8.82108	-3.71553	3.93228e-23	1.76977e-20	21.76	35.54	370.17	534.39
chr20	44640330	44640806	477	*	7.65568	8.53305	5.03839	3.3078	4.10097e-23	1.84203e-20	332.16	408.7	38.42	27.3
chr16	3225263	3225995	733	*	8.68485	9.51671	6.50057	2.89446	4.22117e-23	1.89228e-20	754.25	710.78	82.01	99.08
chr11	66737261	66737676	416	*	8.52762	5.75896	9.41768	-3.44753	4.23896e-23	1.89651e-20	60.92	47.39	526.07	841.76
chr5	175017349	175017844	496	*	7.10953	8.00724	4.24069	3.536	4.32336e-23	1.93046e-20	248.03	266.54	21.43	16.38
chr12	52576717	52577022	306	*	7.92189	8.7792	5.51327	3.11405	4.33205e-23	1.93054e-20	468.51	410.18	40.64	50.71
chr3	43301102	43301600	499	*	7.23814	8.12537	4.50478	3.41459	4.34889e-23	1.93424e-20	272.69	285.79	25.12	20.28
chr2	218346367	218347516	1150	*	8.00621	4.97744	8.915	-3.67826	4.43624e-23	1.96923e-20	31.91	31.1	370.17	595.24
chr1	32001192	32001567	376	*	7.0107	7.91676	4.02299	3.64047	4.67298e-23	2.07027e-20	256.74	226.56	18.47	14.04
chr6	159600975	159601505	531	*	8.2873	5.43139	9.18405	-3.52505	4.7942e-23	2.11983e-20	50.77	35.54	458.1	705.24
chr2	15889836	15890570	735	*	7.67326	8.55652	4.98795	3.36991	4.84357e-23	2.13749e-20	317.66	435.35	36.94	26.52
chr2	88526903	88527484	582	*	7.67266	8.53181	5.24619	3.12971	4.87869e-23	2.14881e-20	362.62	377.6	37.68	38.23
chr9	94190726	94191047	322	*	7.53673	3.94171	8.47577	-4.14728	4.96801e-23	2.18272e-20	17.41	13.33	283.72	428.29
chr14	37116021	37117643	1623	*	9.16249	9.9874	7.03323	2.8385	4.97492e-23	2.18272e-20	919.61	1110.59	128.56	133.4
chr3	17891894	17892460	567	*	7.82864	4.79867	8.73751	-3.67854	4.9884e-23	2.18441e-20	29.01	26.65	345.79	507.87
chr7	12106246	12106629	384	*	6.63603	7.58017	2.91719	4.24244	5.04789e-23	2.2062e-20	179.86	202.87	8.87	6.24
chr2	217537699	217538601	903	*	8.38506	5.61606	9.27516	-3.44722	5.06143e-23	2.20786e-20	53.67	44.42	483.22	755.95
chr6	6320611	6321572	962	*	8.22036	9.09779	5.60245	3.30728	5.19506e-23	2.2618e-20	494.62	601.2	62.06	35.11
chr6	159675194	159675641	448	*	9.00269	6.4238	9.87661	-3.27344	5.43799e-23	2.36304e-20	73.97	97.73	740.34	1139.77
chr3	50523570	50523963	394	*	7.10993	8.00282	4.30507	3.4806	5.72389e-23	2.48251e-20	252.38	260.62	18.47	21.06
chr1	12037708	12038046	339	*	7.85916	4.72145	8.77478	-3.77079	5.74803e-23	2.48823e-20	26.11	26.65	336.92	539.07
chr8	123446166	123446945	780	*	8.52272	5.81696	9.40768	-3.38931	5.84941e-23	2.52729e-20	60.92	51.83	527.55	830.84
chr1	152489551	152490317	767	*	7.69629	8.58903	4.89344	3.47437	5.9199e-23	2.55288e-20	417.74	352.43	39.16	20.28
chr7	43283855	43284233	379	*	7.56599	8.4329	5.06166	3.20286	6.33795e-23	2.72798e-20	371.32	319.85	33.25	33.55
chr9	120105551	120106084	534	*	6.99984	7.90035	4.09236	3.56991	6.42627e-23	2.76075e-20	234.98	242.85	17.73	16.38
chr6	142872398	142872957	560	*	8.24134	9.08146	5.98847	2.96115	6.53855e-23	2.80368e-20	517.82	565.66	59.11	67.87
chr1	111101812	111102141	330	*	7.03611	7.9411	4.06433	3.62795	6.57161e-23	2.81254e-20	217.57	273.95	15.52	17.94
chr8	142426372	142426941	570	*	8.22139	9.06181	5.96588	2.96262	6.67661e-23	2.85209e-20	510.57	558.26	66.5	58.51
chr1	68663506	68663891	386	*	7.12828	8.03459	4.13687	3.64824	6.76965e-23	2.8864e-20	272.69	251.73	12.56	22.62
chr19	18717129	18718724	1596	*	9.59286	10.4172	7.46816	2.83359	6.7951e-23	2.89182e-20	1360.56	1374.17	154.42	199.71
chr20	49442582	49443015	434	*	8.53555	5.92782	9.41207	-3.29931	6.90126e-23	2.9315e-20	55.12	66.64	551.19	811.34
chr3	8618516	8619398	883	*	8.14881	5.41002	9.03648	-3.41916	7.10133e-23	3.01085e-20	40.61	44.42	430.02	620.21
chr5	68248919	68249420	502	*	7.89876	4.97675	8.8003	-3.58225	7.28594e-23	3.08335e-20	33.36	29.62	364.26	527.37
chr5	34743958	34744395	438	*	8.33013	5.43695	9.22961	-3.55782	7.7522e-23	3.27456e-20	34.81	51.83	460.31	740.35
chr3	88350464	88351157	694	*	6.80748	7.73789	3.39923	3.99026	7.7863e-23	3.28285e-20	190.01	236.93	13.3	7.8
chr17	31850501	31851182	682	*	7.74652	8.60782	5.29903	3.14722	7.83695e-23	3.29808e-20	359.72	420.54	42.85	35.89
chrX	20134210	20135393	1184	*	8.42084	9.25756	6.19659	2.93239	7.85879e-23	3.30114e-20	659.97	564.18	69.45	77.23
chr14	31539624	31540049	426	*	8.15458	5.13338	9.06287	-3.66772	8.16673e-23	3.42415e-20	42.06	28.13	404.16	665.45
chr16	57846469	57846740	272	*	6.88966	7.80453	3.76431	3.75513	8.32098e-23	3.4767e-20	216.12	231	16.26	10.92
chr14	97050361	97051094	734	*	7.9293	8.78678	5.51907	3.11196	8.3227e-23	3.4767e-20	388.73	494.58	48.03	43.69
chr7	100494192	100495232	1041	*	10.0375	10.8892	7.68272	3.05972	8.60696e-23	3.58883e-20	1734.78	2058.29	157.38	253.54
chr11	112100813	112101156	344	*	7.69447	4.19717	8.62913	-4.06699	8.69469e-23	3.61876e-20	15.96	20.73	292.59	499.29
chr4	128157999	128158491	493	*	8.0916	5.04371	9.00162	-3.69147	9.06135e-23	3.76446e-20	31.91	34.06	376.08	649.07
chr17	63726607	63727302	696	*	7.93278	4.87196	8.84363	-3.70187	9.12981e-23	3.78597e-20	31.91	26.65	352.44	566.38
chr9	101792231	101792919	689	*	9.10236	6.55036	9.97379	-3.24585	9.2497e-23	3.82868e-20	100.08	87.37	769.16	1241.97
chr1	50892886	50893287	402	*	7.50624	8.37217	5.01205	3.19204	9.29965e-23	3.84235e-20	317.66	345.02	31.77	32.77
chr8	95972814	95973535	722	*	8.92479	6.2909	9.80363	-3.32156	9.3427e-23	3.85312e-20	88.48	68.12	682.71	1104.67
chr21	15588229	15588983	755	*	8.66695	9.48956	6.55542	2.819	9.6184e-23	3.95962e-20	715.09	722.62	96.05	92.06
chr15	81204134	81205043	910	*	9.05435	6.68991	9.90699	-3.0678	9.6574e-23	3.96848e-20	110.24	96.25	806.1	1114.03
chr6	6008659	6009622	964	*	9.46192	10.3028	7.20247	2.96675	9.80618e-23	4.02232e-20	1272.08	1254.23	117.48	177.09
chr8	142427503	142428377	875	*	8.57938	9.42618	6.26823	3.01542	9.90583e-23	4.05587e-20	625.16	750.76	89.4	64.75
chr18	13267535	13267961	427	*	7.16613	8.07452	4.14346	3.66426	1.03548e-22	4.23205e-20	277.04	262.1	23.64	11.7
chr3	3840485	3841680	1196	*	8.22529	9.06185	6.00238	2.92978	1.03779e-22	4.23387e-20	509.12	559.74	65.02	63.19
chr10	450036	450687	652	*	7.9985	5.10643	8.8979	-3.5547	1.04183e-22	4.2427e-20	33.36	35.54	378.3	575.74
chr1	237205208	237206847	1640	*	8.22641	9.06759	5.96445	2.96742	1.07755e-22	4.37413e-20	517.82	555.29	68.71	56.17
chr21	35560150	35560704	555	*	7.67796	4.36101	8.60369	-3.91863	1.07796e-22	4.37413e-20	17.41	23.69	302.94	475.1
chr2	131586559	131586891	333	*	7.79378	8.64896	5.40557	3.08963	1.09513e-22	4.42313e-20	413.39	389.45	46.55	38.23
chr16	84347977	84348776	800	*	8.06226	8.90212	5.81151	2.9572	1.09548e-22	4.42313e-20	484.46	472.37	56.15	56.17
chr6	13440602	13441391	790	*	8.22854	5.22424	9.13571	-3.65275	1.09588e-22	4.42313e-20	36.26	38.5	404.16	720.84
chr10	71224574	71225079	506	*	7.67886	8.53434	5.28772	3.09311	1.11585e-22	4.49571e-20	371.32	370.2	39.9	38.23
chr3	14321823	14322214	392	*	7.84132	8.70007	5.41878	3.12223	1.17874e-22	4.7407e-20	374.23	457.56	46.55	39.01
chr1	231014274	231014792	519	*	9.34113	6.62447	10.227	-3.39621	1.18751e-22	4.76751e-20	123.29	74.04	914.72	1482.25
chr15	81211586	81211972	387	*	7.72537	4.79867	8.62724	-3.58391	1.25769e-22	5.03176e-20	29.01	26.65	339.14	451.7
chr10	133467821	133468418	598	*	7.07505	7.99456	3.87134	3.81633	1.25777e-22	5.03176e-20	250.93	259.14	20.69	8.58
chr20	36966055	36966425	371	*	7.05743	7.95566	4.18154	3.53725	1.33253e-22	5.32146e-20	262.54	233.96	20.69	15.6
chr16	2213205	2213649	445	*	7.27414	8.15473	4.62005	3.3378	1.3556e-22	5.40409e-20	290.1	279.87	27.34	21.84
chr20	49263122	49263593	472	*	8.44853	5.6791	9.33865	-3.44346	1.36725e-22	5.44096e-20	56.57	45.9	490.61	804.32
chr8	142597387	142598094	708	*	7.48129	8.36233	4.82198	3.34125	1.38236e-22	5.49146e-20	320.56	337.62	34.73	21.84
chr6	44300143	44300778	636	*	7.70001	8.55645	5.29979	3.10068	1.39017e-22	5.51281e-20	390.18	362.79	42.12	36.67
chr17	77469282	77469902	621	*	7.40534	8.32156	4.25776	3.76907	1.40058e-22	5.53775e-20	277.04	362.79	27.34	10.92
chr3	133757961	133758691	731	*	8.17497	9.01399	5.93136	2.94924	1.40134e-22	5.53775e-20	548.28	485.7	63.54	58.51
chr6	28505328	28505807	480	*	6.88629	7.80083	3.7665	3.74819	1.45842e-22	5.75331e-20	200.17	245.81	15.52	11.7
chrX	53280400	53281038	639	*	8.26133	5.45991	9.15396	-3.47287	1.47421e-22	5.80548e-20	39.16	48.87	441.1	698.22
chr15	81210244	81211267	1024	*	9.13631	6.62823	10.0036	-3.20329	1.48835e-22	5.85103e-20	98.63	99.21	786.15	1266.94
chr17	20624492	20624963	472	*	7.49846	8.36498	4.99824	3.1972	1.49397e-22	5.86296e-20	333.61	325.77	28.82	35.11
chr7	137555759	137556466	708	*	9.01752	6.46065	9.8894	-3.24929	1.55239e-22	6.08171e-20	73.97	102.17	747.73	1149.14
chr4	52976317	52976757	441	*	8.27911	5.22716	9.1894	-3.69306	1.57107e-22	6.14097e-20	29.01	45.9	422.63	745.03
chr7	131584024	131584345	322	*	6.81152	7.73185	3.59329	3.82949	1.57293e-22	6.14097e-20	204.52	220.64	14.78	9.36
chr3	42429524	42430177	654	*	6.9037	7.83417	3.49425	3.98493	1.58733e-22	6.18652e-20	197.27	259.14	15.52	7.02
chr10	53149539	53150134	596	*	8.53067	5.83578	9.41473	-3.37538	1.64792e-22	6.41167e-20	60.92	53.31	520.16	844.88
chr5	9336181	9336700	520	*	7.49599	3.86897	8.43639	-4.16249	1.65561e-22	6.43055e-20	18.86	10.37	277.81	415.03
chr20	51018930	51019524	595	*	9.52802	7.1456	10.3826	-3.08397	1.66157e-22	6.44265e-20	124.74	158.44	1083.92	1586.01
chr2	85603637	85604480	844	*	7.96713	5.25369	8.85274	-3.393	1.76048e-22	6.81453e-20	33.36	42.94	401.94	522.69
chr3	56501127	56501421	295	*	7.68354	8.55188	5.16437	3.21528	1.76761e-22	6.83047e-20	362.62	387.97	28.82	42.91
chr2	34387303	34387730	428	*	6.73658	7.67154	3.2328	4.06046	1.78633e-22	6.89107e-20	187.11	220.64	12.56	6.24
chr19	51520052	51520666	615	*	8.24504	9.07678	6.06166	2.88945	1.802e-22	6.93973e-20	543.93	536.04	66.5	67.09
chr16	2384017	2384433	417	*	7.23589	8.12209	4.51523	3.40075	1.91498e-22	7.36231e-20	262.54	294.68	19.21	26.52
chr6	28737507	28737828	322	*	6.91848	7.82794	3.87945	3.67656	1.95082e-22	7.48741e-20	220.47	233.96	17.73	11.7
chr18	46753798	46754239	442	*	6.75125	7.68155	3.34488	3.98168	1.99117e-22	7.62937e-20	192.91	217.68	13.3	7.02
chr11	10376716	10377330	615	*	8.72672	6.10833	9.60419	-3.30522	2.11204e-22	8.07884e-20	58.02	79.96	610.3	946.3
chr6	26331546	26331897	352	*	7.15148	8.03899	4.41467	3.41476	2.12419e-22	8.11165e-20	266.89	259.14	18.47	24.18
chr7	131580224	131580879	656	*	9.37504	10.2004	7.2423	2.83878	2.1908e-22	8.35194e-20	1053.05	1300.13	137.43	165.39
chr8	119838731	119839319	589	*	7.65995	4.30586	8.58762	-3.94342	2.20124e-22	8.37769e-20	20.31	19.25	289.64	479.78
chr4	175749945	175750852	908	*	7.84301	8.69324	5.5009	3.04516	2.2172e-22	8.42429e-20	420.64	407.22	40.64	49.93
chr4	84039949	84040405	457	*	7.67569	4.50717	8.59315	-3.78998	2.24257e-22	8.50644e-20	20.31	25.17	306.63	465.74
chr1	147296971	147297227	257	*	6.64996	7.58017	3.24541	3.98451	2.2656e-22	8.57945e-20	179.86	202.87	9.61	9.36
chr18	59697243	59697832	590	*	8.58905	6.0291	9.46122	-3.25067	2.349e-22	8.88044e-20	56.57	74.04	571.88	837.86
chr15	81165965	81166499	535	*	8.29267	5.70316	9.16755	-3.27784	2.59268e-22	9.78537e-20	44.97	59.23	485.43	664.67
chr20	58563191	58563579	389	*	7.55314	8.43694	4.86133	3.3744	2.63404e-22	9.92494e-20	349.57	343.54	20.69	37.45
chr1	111112871	111113282	412	*	6.78841	7.71265	3.49952	3.88475	2.65376e-22	9.98267e-20	190.01	229.52	14.04	8.58
chr9	117001655	117002318	664	*	9.47732	7.20206	10.32	-2.97854	2.74004e-22	1.02901e-19	150.85	143.64	1058.79	1497.86
chr19	50745867	50746290	424	*	6.67462	7.60042	3.35656	3.91274	2.75512e-22	1.03297e-19	204.52	183.62	10.34	10.14
chr16	80767125	80767764	640	*	8.25206	5.36207	9.15131	-3.54921	2.77288e-22	1.03791e-19	31.91	50.35	436.67	700.56
chr2	64441501	64441915	415	*	6.55176	7.49838	2.76868	4.27995	2.81375e-22	1.05148e-19	197.27	164.37	7.39	6.24
chr6	28693753	28694089	337	*	6.68665	7.62768	3.04463	4.16469	2.82522e-22	1.05403e-19	204.52	191.02	11.82	4.68
chr22	46940966	46941258	293	*	7.73891	8.58779	5.40908	3.03136	2.91733e-22	1.0866e-19	378.58	390.93	42.85	42.13
chr17	66680962	66681554	593	*	7.81829	4.55525	8.74113	-3.86832	2.93597e-22	1.09175e-19	17.41	29.62	321.41	534.39
chr2	88650234	88651023	790	*	7.90094	8.75277	5.54404	3.05717	3.05808e-22	1.13519e-19	381.48	481.26	47.29	46.03
chr5	149757487	149758300	814	*	9.85061	7.48067	10.7038	-3.06967	3.06279e-22	1.13519e-19	195.82	161.41	1312.96	2022.88
chr2	38671379	38671778	400	*	7.92683	8.77826	5.5736	3.05519	3.07032e-22	1.13612e-19	424.99	453.12	40.64	54.61
chr17	35030695	35031126	432	*	7.0664	7.961	4.23912	3.48965	3.12655e-22	1.15505e-19	245.13	253.21	22.17	15.6
chr12	49374734	49375508	775	*	9.41467	10.2318	7.34461	2.77498	3.2074e-22	1.18299e-19	1199.55	1205.36	144.08	180.99
chr7	26386153	26386872	720	*	7.81761	8.66269	5.52166	2.99853	3.22404e-22	1.1872e-19	400.33	410.18	45.07	46.81
chr11	44268226	44268723	498	*	8.353	5.80024	9.22451	-3.24256	3.23614e-22	1.18924e-19	52.22	59.23	494.3	702.12
chr15	27136542	27137652	1111	*	8.56175	9.40498	6.28206	2.98371	3.24007e-22	1.18924e-19	664.32	691.53	62.8	92.84
chr9	10612612	10613444	833	*	9.07058	9.92728	6.6678	3.1023	3.25358e-22	1.19226e-19	916.71	1030.63	74.63	128.72
chr14	104653823	104654276	454	*	8.01269	8.85342	5.75452	2.96208	3.26378e-22	1.19407e-19	445.3	479.77	50.24	57.73
chr2	66614268	66614764	497	*	6.88632	7.79593	3.84485	3.67687	3.34875e-22	1.22319e-19	201.62	242.85	16.26	12.48
chr14	105058583	105059060	478	*	7.15864	8.054	4.3214	3.4978	3.3547e-22	1.22339e-19	287.2	244.33	24.38	15.6
chr11	121287751	121288366	616	*	8.74679	6.30669	9.60734	-3.13648	3.38148e-22	1.2304e-19	76.88	81.44	633.21	926.8
chr15	63176070	63176724	655	*	9.63948	7.31944	10.4873	-3.02147	3.38475e-22	1.2304e-19	161	158.44	1145.98	1724.87
chr18	31804350	31805214	865	*	8.14088	8.97342	5.95113	2.89416	3.4199e-22	1.24118e-19	503.32	501.99	61.33	62.41
chr6	28779676	28780055	380	*	6.77995	7.70117	3.54589	3.83722	3.51369e-22	1.27318e-19	207.42	208.79	14.78	8.58
chr9	91423033	91423673	641	*	7.43403	3.46338	8.38726	-4.42276	3.53428e-22	1.2786e-19	7.25	14.81	260.08	409.57
chr13	79179470	79179743	274	*	6.89046	7.79475	3.92896	3.6117	3.57067e-22	1.28971e-19	219.02	225.08	13.3	17.16
chr8	55306770	55307758	989	*	8.43804	9.27202	6.23643	2.90644	3.76361e-22	1.35724e-19	636.76	599.72	65.76	85.03
chr7	93205502	93205841	340	*	7.15999	8.05556	4.31991	3.49904	3.83392e-22	1.3804e-19	259.64	272.46	25.12	14.82
chr19	42440373	42441067	695	*	8.6558	9.47303	6.58472	2.7751	3.87869e-22	1.3943e-19	719.44	701.89	96.79	95.18
chr2	166449530	166449995	466	*	7.63911	4.24852	8.56864	-3.96809	3.89515e-22	1.39801e-19	23.21	14.81	288.16	471.2
chr5	14068235	14068662	428	*	8.03401	5.10198	8.93625	-3.58185	3.94322e-22	1.41302e-19	43.51	25.17	393.08	586.66
chr1	75601972	75602540	569	*	7.95317	8.81981	5.45161	3.1916	4.29922e-22	1.53817e-19	401.78	501.99	53.2	34.33
chr2	242558436	242559365	930	*	7.61348	8.5011	4.8754	3.40746	4.42089e-22	1.57921e-19	329.26	395.37	38.42	20.28
chr9	88016979	88017565	587	*	7.40434	8.2691	4.92211	3.17475	4.43586e-22	1.58206e-19	307.5	309.48	31.77	28.86
chr12	1483049	1484038	990	*	9.01447	6.48373	9.8839	-3.22095	4.47546e-22	1.59368e-19	79.78	99.21	723.35	1166.3
chr1	17885821	17886179	359	*	7.04951	7.9403	4.2717	3.44522	4.60518e-22	1.6373e-19	230.63	260.62	20.69	17.94
chr4	4616943	4617609	667	*	8.21681	5.45891	9.10602	-3.42845	4.68115e-22	1.6617e-19	42.06	45.9	423.37	678.72
chr7	8300940	8302312	1373	*	9.08305	9.89781	7.03007	2.75653	4.75437e-22	1.68506e-19	887.7	1020.26	124.87	136.52
chr17	64441222	64441866	645	*	8.90154	6.44772	9.76347	-3.14855	4.76549e-22	1.68637e-19	78.33	96.25	695.27	1043.04
chr6	28956319	28957163	845	*	8.36805	9.20421	6.14855	2.92231	4.91074e-22	1.73506e-19	519.27	660.43	71.67	70.21
chr9	133239899	133240420	522	*	7.50437	8.39417	4.739	3.43105	5.02162e-22	1.77148e-19	326.36	346.5	35.47	17.94
chr7	26331218	26331995	778	*	8.73587	9.55443	6.65489	2.78489	5.15784e-22	1.81671e-19	739.75	764.09	93.1	108.44
chr1	40198830	40199351	522	*	7.00043	7.89165	4.21703	3.45085	5.22637e-22	1.83799e-19	230.63	244.33	18.47	18.72
chr11	68611202	68611660	459	*	8.66508	9.48467	6.57638	2.79247	5.60958e-22	1.9697e-19	735.4	697.45	88.66	102.2
chr16	55357469	55359406	1938	*	9.3746	10.1825	7.37095	2.70583	5.68805e-22	1.99417e-19	1096.57	1227.57	162.55	168.51
chr18	13614855	13615225	371	*	6.68187	7.61138	3.29145	3.96201	5.76425e-22	2.01776e-19	204.52	186.58	12.56	7.02
chr8	96420259	96420644	386	*	6.79853	7.72093	3.54334	3.85067	5.80323e-22	2.02602e-19	216.12	205.83	15.52	7.8
chr19	11376395	11376796	402	*	7.80554	8.64918	5.52231	2.98466	5.80569e-22	2.02602e-19	407.59	395.37	44.33	47.59
chr7	20817386	20818254	869	*	8.86223	9.69066	6.70544	2.86068	5.86043e-22	2.04198e-19	770.21	882.55	90.14	118.58
chr1	229979574	229979986	413	*	7.67453	8.53051	5.27862	3.09363	6.33687e-22	2.2046e-19	394.53	345.02	34.73	42.91
chr19	54645127	54645442	316	*	8.00791	5.22132	8.89939	-3.45162	6.41378e-22	2.22794e-19	43.51	31.1	388.64	566.38
chr1	35249188	35249539	352	*	8.1183	8.95007	5.93477	2.88661	6.55582e-22	2.2738e-19	496.07	493.1	58.37	63.97
chr6	150329736	150330007	272	*	7.49128	8.35629	5.0065	3.17482	6.59287e-22	2.28316e-19	310.4	345.02	36.2	28.08
chr2	171219270	171219814	545	*	7.29766	8.17464	4.68481	3.29355	6.69852e-22	2.31621e-19	265.44	312.45	28.82	22.62
chr1	162947778	162948351	574	*	8.34995	5.85587	9.21587	-3.18493	7.00929e-22	2.41998e-19	55.12	60.71	496.52	692.76
chr14	60981467	60982549	1083	*	8.84233	9.68865	6.5354	3.0055	7.0253e-22	2.42174e-19	809.37	841.09	114.52	70.99
chr14	95385202	95385647	446	*	6.89236	7.79504	3.95397	3.58375	7.03574e-22	2.42174e-19	214.67	229.52	17.73	13.26
chr2	227980337	227980976	640	*	7.91866	4.83731	8.83082	-3.70894	7.21136e-22	2.47842e-19	27.56	29.62	330.27	580.42
chr3	110251861	110252308	448	*	8.14521	5.48202	9.02658	-3.34068	7.28666e-22	2.50052e-19	44.97	44.42	418.94	624.11
chr16	759582	759938	357	*	8.76229	9.58424	6.65578	2.80979	7.3207e-22	2.5084e-19	725.24	809.99	90.88	110.78
chr8	10589934	10591184	1251	*	9.03778	9.85307	6.98099	2.75967	7.36086e-22	2.51836e-19	912.36	937.34	113.79	138.86
chr17	7197657	7198479	823	*	9.26113	10.0777	7.19499	2.76896	7.70591e-22	2.63244e-19	1022.59	1138.72	130.78	162.27
chr5	157817548	157818015	468	*	6.87533	7.7845	3.8407	3.66496	7.71761e-22	2.63247e-19	227.73	213.23	17.73	10.92
chr9	103790560	103791818	1259	*	9.05091	9.86418	7.00884	2.74435	7.73096e-22	2.63307e-19	865.94	998.05	123.39	134.18
chr3	24243475	24244081	607	*	8.15517	5.25024	9.05549	-3.55557	7.88999e-22	2.6832e-19	42.06	34.06	390.12	674.03
chr6	132764283	132764780	498	*	7.60555	4.01637	8.54433	-4.12514	7.97288e-22	2.70733e-19	10.15	22.21	277.81	468.86
chr3	145998684	145999074	391	*	8.41411	5.83808	9.28776	-3.26079	8.04443e-22	2.72754e-19	52.22	62.19	498	752.05
chr5	117892895	117893440	546	*	9.16932	6.69203	10.0336	-3.16868	8.11918e-22	2.74821e-19	95.73	111.06	795.76	1300.48
chr16	48560421	48560921	501	*	7.16414	8.04742	4.47844	3.35866	8.12961e-22	2.74821e-19	261.09	268.02	25.86	18.72
chr14	69714340	69714874	535	*	8.51934	5.92818	9.39437	-3.27477	8.21875e-22	2.77421e-19	53.67	68.12	527.55	818.36
chr5	180075703	180076913	1211	*	8.66189	9.48668	6.53354	2.83086	8.25298e-22	2.78162e-19	639.66	795.18	90.88	94.4
chr14	71676640	71677038	399	*	8.03337	5.33316	8.91787	-3.37377	8.58103e-22	2.8879e-19	39.16	41.46	391.6	575.74
chr4	3646908	3648281	1374	*	8.97039	9.7828	6.9345	2.7373	8.63462e-22	2.90163e-19	868.84	892.91	131.52	113.12
chr3	126673189	126673743	555	*	8.17689	9.00719	6.00516	2.87423	8.67801e-22	2.9119e-19	497.52	531.6	60.59	67.87
chr20	476491	477482	992	*	8.30373	5.46239	9.1994	-3.501	8.74385e-22	2.92966e-19	31.91	56.27	458.84	716.94
chr18	20314786	20315511	726	*	8.53269	5.74441	9.42429	-3.45346	8.828e-22	2.95287e-19	42.06	65.15	511.3	862.83
chr18	5890368	5891263	896	*	8.35067	9.18141	6.17541	2.87648	8.83918e-22	2.95287e-19	554.09	607.12	79.8	64.75
chr1	229210938	229211498	561	*	6.79376	7.70472	3.73128	3.69177	8.9994e-22	3.00197e-19	229.18	188.06	13.3	13.26
chr5	132621207	132621776	570	*	8.54575	9.36597	6.45232	2.79531	9.23111e-22	3.07475e-19	623.71	695.97	90.88	84.25
chr19	42424449	42424969	521	*	7.90914	8.74649	5.67965	2.93063	9.37628e-22	3.11852e-19	419.19	439.79	50.24	52.27
chr10	31033470	31033888	419	*	7.82874	4.91162	8.72993	-3.56692	9.41709e-22	3.12751e-19	24.66	35.54	342.09	507.09
chr4	42675099	42675512	414	*	6.85113	7.76879	3.67901	3.77979	9.43995e-22	3.13052e-19	243.68	192.5	16.26	9.36
chr5	65878304	65878826	523	*	7.12747	8.02977	4.1946	3.58218	9.58517e-22	3.17403e-19	214.67	308	14.78	21.84
chr3	179660026	179660541	516	*	7.61748	8.46768	5.27555	3.03973	9.64245e-22	3.18513e-19	343.77	364.27	37.68	39.79
chr8	35092595	35093771	1177	*	7.7732	8.63351	5.3354	3.12875	9.64676e-22	3.18513e-19	397.43	396.85	48.77	31.99
chr19	51478997	51479420	424	*	6.89654	7.81076	3.78173	3.7392	9.96289e-22	3.28473e-19	194.37	254.7	10.34	17.16
chr2	17721559	17722110	552	*	7.73756	8.58875	5.38662	3.04873	1.0025e-21	3.30042e-19	353.92	416.1	38.42	45.25
chr4	8911277	8911613	337	*	6.63803	7.56171	3.35946	3.87311	1.01107e-21	3.32361e-19	200.17	177.69	9.61	10.92
chr17	76882164	76882360	197	*	7.27199	8.1476	4.67447	3.28158	1.01248e-21	3.32361e-19	282.84	284.31	21.43	29.65
chr12	93485533	93486055	523	*	7.7829	4.72062	8.69385	-3.69008	1.05016e-21	3.44233e-19	27.56	25.17	312.54	515.67
chr19	29980091	29980692	602	*	6.91892	7.81348	4.09236	3.48529	1.05775e-21	3.45831e-19	224.83	225.08	17.73	16.38
chr12	126667228	126667827	600	*	8.14049	5.40848	9.02761	-3.40107	1.05809e-21	3.45831e-19	44.97	39.98	405.64	638.15
chr15	39791869	39792483	615	*	8.13354	5.22015	9.03446	-3.56076	1.0647e-21	3.47141e-19	46.42	28.13	400.47	648.29
chr9	74652463	74652855	393	*	7.95699	4.9058	8.86723	-3.67969	1.06515e-21	3.47141e-19	36.26	23.69	346.53	587.44
chr15	39880113	39880903	791	*	9.64029	7.25354	10.4953	-3.08209	1.09231e-21	3.55482e-19	134.9	170.29	1123.82	1763.1
chr18	9974279	9975027	749	*	8.04633	5.33261	8.93195	-3.38463	1.11295e-21	3.61448e-19	40.61	39.98	389.38	587.44
chr19	35738511	35740112	1602	*	9.01868	9.87684	6.60184	3.10916	1.11383e-21	3.61448e-19	929.76	950.66	125.61	68.65
chr18	66470601	66471118	518	*	8.31993	5.50428	9.21365	-3.47539	1.11853e-21	3.62454e-19	49.32	41.46	431.5	755.95
chr6	43800854	43801346	493	*	7.99007	8.85813	5.47376	3.20142	1.14849e-21	3.71632e-19	442.4	485.7	56.89	31.99
chr4	164264752	164265840	1089	*	7.96001	8.81013	5.61884	3.03683	1.15403e-21	3.72892e-19	407.59	490.14	56.15	42.13
chr10	134822499	134823442	944	*	8.34009	9.17908	6.09671	2.94386	1.15651e-21	3.73163e-19	501.87	657.47	63.54	73.33
chr3	142677514	142677946	433	*	7.33186	8.1988	4.82723	3.1917	1.16664e-21	3.75894e-19	294.45	293.2	31.03	25.74
chr5	83679559	83680796	1238	*	8.38624	9.21308	6.24187	2.84516	1.17019e-21	3.76505e-19	596.15	590.83	83.49	67.87
chr10	102488756	102489667	912	*	8.15974	8.98946	5.99264	2.86796	1.23803e-21	3.97769e-19	532.33	484.22	66.5	60.85
chr11	125024379	125026039	1661	*	8.68786	9.55051	6.22689	3.15003	1.26113e-21	4.04616e-19	722.34	777.41	97.53	52.27
chr14	104808353	104808780	428	*	7.32966	8.22636	4.47443	3.50679	1.30204e-21	4.1715e-19	248.03	350.95	28.08	16.38
chr8	126622681	126623266	586	*	7.38509	3.87047	8.32055	-4.05869	1.30807e-21	4.18493e-19	17.41	11.85	257.13	382.27
chr4	5981773	5982101	329	*	7.33127	8.19805	4.82828	3.1901	1.32814e-21	4.24316e-19	308.95	278.39	30.29	26.52
chr1	14219083	14219894	812	*	8.6195	9.43433	6.56608	2.75411	1.34041e-21	4.27631e-19	677.38	706.33	99.01	90.5
chr19	44284849	44285667	819	*	10.3077	11.1407	8.11448	2.89429	1.34657e-21	4.28995e-19	2162.67	2352.97	216.49	337.8
chr21	34442187	34443497	1311	*	8.49617	9.33856	6.22374	2.97002	1.35033e-21	4.2959e-19	607.75	687.08	89.4	60.07
chr20	57817754	57818233	480	*	6.93243	7.83321	4.02116	3.55605	1.38979e-21	4.41158e-19	211.77	244.33	19.21	13.26
chr1	47573501	47574212	712	*	7.71114	8.57674	5.22023	3.18046	1.39059e-21	4.41158e-19	446.75	316.89	33.99	40.57
chr12	85903489	85903961	473	*	6.77983	7.69034	3.72454	3.68004	1.43338e-21	4.54098e-19	214.67	198.43	15.52	10.92
chr1	53648914	53649451	538	*	8.22008	5.7019	9.08833	-3.20477	1.45735e-21	4.61048e-19	49.32	54.79	454.4	634.25
chr3	48261017	48261400	384	*	7.5683	8.42151	5.19858	3.06379	1.46191e-21	4.61846e-19	348.12	337.62	39.9	33.55
chr8	131162096	131162759	664	*	8.37908	5.72145	9.25998	-3.3327	1.49145e-21	4.70523e-19	52.22	53.31	464.01	762.19
chr4	82529134	82529484	351	*	6.7741	7.69771	3.49689	3.86286	1.49779e-21	4.71869e-19	184.21	231	14.78	7.8
chr3	13460952	13462201	1250	*	8.9296	9.74763	6.85257	2.77759	1.50045e-21	4.72051e-19	773.11	946.22	121.91	109.22
chr6	21149574	21150141	568	*	8.53074	5.83502	9.41487	-3.36662	1.52467e-21	4.79006e-19	63.82	50.35	503.91	861.27
chrX	82762976	82763536	561	*	6.76015	7.69118	3.33901	3.97703	1.53177e-21	4.80572e-19	203.07	210.27	14.78	5.46
chr21	15645978	15646522	545	*	7.29981	8.17892	4.66276	3.31236	1.54589e-21	4.84331e-19	324.91	254.7	28.82	21.84
chr2	223587034	223587691	658	*	7.93104	4.71647	8.85116	-3.81419	1.55481e-21	4.86454e-19	34.81	17.77	336.18	587.44
chr15	81116270	81117033	764	*	8.24683	5.57183	9.12921	-3.34756	1.58235e-21	4.9439e-19	53.67	41.46	438.89	681.06
chr4	95425692	95426113	422	*	7.55152	4.19598	8.47927	-3.93156	1.61273e-21	5.03186e-19	17.41	19.25	266.73	447.02
chr2	171774591	171775133	543	*	8.01357	5.07379	8.91636	-3.58229	1.62525e-21	5.06396e-19	36.26	31.1	353.92	612.4
chr15	30181747	30182093	347	*	6.85091	7.75039	3.9578	3.54162	1.63003e-21	5.06866e-19	224.83	205.83	16.26	14.82
chr6	46221903	46222690	788	*	7.86784	4.97467	8.76732	-3.54098	1.63122e-21	5.06866e-19	37.71	25.17	348.01	523.47
chr15	67467239	67467722	484	*	8.51904	9.35981	6.26059	2.95817	1.69598e-21	5.26267e-19	609.2	704.85	62.06	91.28
chr9	111059271	111059764	494	*	8.53573	5.78491	9.42437	-3.4174	1.70611e-21	5.28685e-19	37.71	72.56	551.93	822.26
chr8	143690358	143690806	449	*	8.15715	8.98392	6.01343	2.84461	1.72453e-21	5.33665e-19	506.22	506.43	61.33	67.87
chr7	40847909	40848582	674	*	9.56633	7.14452	10.425	-3.11366	1.72789e-21	5.33976e-19	134.9	148.08	1026.28	1723.31
chr2	162602383	162603097	715	*	6.78952	7.70619	3.63439	3.76086	1.75601e-21	5.41592e-19	208.87	208.79	16.26	8.58
chr13	95363220	95364700	1481	*	8.90958	9.72241	6.87067	2.73926	1.75731e-21	5.41592e-19	781.81	907.72	111.57	122.48
chr6	158507135	158507845	711	*	8.19881	5.48544	9.08441	-3.38322	1.85141e-21	5.6982e-19	34.81	54.79	437.41	648.29
chr12	132851520	132852082	563	*	8.27184	9.10928	6.0416	2.93007	1.8692e-21	5.74514e-19	500.42	604.16	57.63	74.11
chr1	1977963	1978208	246	*	7.48456	8.35035	4.9917	3.17949	1.87217e-21	5.7465e-19	368.42	284.31	33.99	29.65
chr5	87970095	87971166	1072	*	8.71574	9.55759	6.44796	2.96661	1.89932e-21	5.82194e-19	652.72	854.41	72.41	102.2
chr2	234118169	234118907	739	*	8.26612	9.09153	6.13302	2.83324	1.91839e-21	5.87249e-19	509.12	581.95	70.93	69.43
chr7	101369230	101369594	365	*	6.97759	7.8646	4.24698	3.39793	1.95221e-21	5.96796e-19	227.73	238.41	18.47	19.5
chr16	55786704	55787283	580	*	6.49739	7.46658	1.93287	4.8206	1.95859e-21	5.97433e-19	149.4	204.35	2.96	4.68
chr17	6413754	6414129	376	*	7.57881	8.4456	5.07577	3.18874	1.95957e-21	5.97433e-19	291.55	405.74	35.47	31.99
chr11	33550985	33551425	441	*	8.17967	5.48055	9.06409	-3.36844	1.99216e-21	6.06555e-19	49.32	39.98	415.98	654.53
chr10	71258781	71259216	436	*	7.74591	8.5871	5.48377	2.9599	2.01173e-21	6.11691e-19	395.98	373.16	45.81	43.69
chr5	116102158	116102609	452	*	7.90313	8.74694	5.61829	2.98321	2.02288e-21	6.1426e-19	406.14	453.12	42.85	55.39
chr21	36698951	36699456	506	*	7.94046	4.80024	8.85623	-3.75258	2.04678e-21	6.20686e-19	26.11	29.62	319.93	606.94
chr2	18246863	18247741	879	*	9.08965	6.5821	9.95687	-3.19283	2.07017e-21	6.26942e-19	113.14	78.48	769.9	1217.79
chr8	29813100	29813541	442	*	8.42621	5.77935	9.30618	-3.32112	2.1283e-21	6.43685e-19	58.02	51.83	475.83	790.27
chr18	75362720	75363105	386	*	6.5878	7.51195	3.30054	3.87273	2.21838e-21	6.69746e-19	175.51	189.54	10.34	9.36
chr8	22846793	22847169	377	*	7.61148	4.46338	8.52772	-3.76061	2.22037e-21	6.69746e-19	14.5	29.62	305.15	432.97
chr5	150484237	150485030	794	*	9.547	7.18972	10.3989	-3.05157	2.26381e-21	6.81941e-19	129.09	162.89	1058.06	1642.18
chr1	55246765	55247522	758	*	8.25946	9.08106	6.15562	2.80354	2.27097e-21	6.83192e-19	532.33	550.85	73.15	69.43
chr7	129418729	129420558	1830	*	10.1896	10.9933	8.21466	2.67352	2.27671e-21	6.84011e-19	1888.53	2188.6	271.16	322.98
chr12	108434690	108435315	626	*	6.4939	7.44172	2.67901	4.28139	2.29348e-21	6.88139e-19	155.2	192.5	8.13	4.68
chr11	20618178	20619192	1015	*	8.04939	8.89783	5.72342	3.01969	2.30761e-21	6.91464e-19	478.66	475.33	63.54	42.13
chr4	122712649	122713153	505	*	7.57833	4.4131	8.4956	-3.77398	2.34451e-21	7.01594e-19	15.96	26.65	288.9	432.97
chr3	14646580	14646924	345	*	7.03257	7.92701	4.20739	3.47718	2.40268e-21	7.18053e-19	233.53	253.21	22.9	14.04
chr11	17740724	17742247	1524	*	8.81049	9.62222	6.77954	2.73058	2.41107e-21	7.19612e-19	749.9	826.28	102.7	117.02
chr2	54731988	54732680	693	*	7.62364	4.54966	8.53533	-3.69451	2.49108e-21	7.41994e-19	26.11	20.73	291.11	450.92
chr3	32858150	32859098	949	*	8.63846	9.45662	6.56047	2.77825	2.4926e-21	7.41994e-19	709.29	695.97	84.23	104.54
chr5	159072170	159072593	424	*	7.23551	8.10596	4.69404	3.22568	2.52464e-21	7.50546e-19	275.59	275.43	22.9	28.86
chr12	121971045	121971359	315	*	7.74401	4.511	8.66517	-3.83023	2.5363e-21	7.53025e-19	14.5	31.1	311.06	500.85
chr7	95655758	95656361	604	*	7.39973	8.26365	4.92603	3.16159	2.54171e-21	7.53647e-19	277.04	337.62	28.82	31.99
chr15	85360044	85361082	1039	*	9.18686	9.99235	7.19982	2.68564	2.57594e-21	7.62798e-19	1082.06	955.11	141.12	152.91
chr5	169055903	169056264	362	*	7.84553	4.86897	8.75084	-3.61027	2.59692e-21	7.67653e-19	37.71	20.73	343.57	518.01
chr10	134910171	134910759	589	*	7.18138	8.06633	4.47576	3.37082	2.5991e-21	7.67653e-19	281.39	254.7	27.34	17.16
chr17	77785165	77785651	487	*	8.22303	9.04577	6.11048	2.81217	2.62313e-21	7.73741e-19	509.12	547.89	67.98	70.21
chr10	88014266	88014579	314	*	7.14582	8.03401	4.40064	3.40618	2.68459e-21	7.90843e-19	282.84	241.37	25.86	16.38
chr3	46698206	46698793	588	*	8.92564	6.37025	9.79739	-3.23633	2.71541e-21	7.98883e-19	89.93	75.52	653.16	1126.51
chr5	132627897	132628304	408	*	7.33149	8.19456	4.86634	3.15207	2.74048e-21	8.05213e-19	306.05	279.87	31.03	27.3
chr1	201244226	201244848	623	*	8.15131	8.97891	6.00098	2.84915	2.75941e-21	8.09729e-19	532.33	476.81	67.24	60.85
chr5	135711544	135712139	596	*	6.53814	7.47162	3.06611	4.02284	2.77397e-21	8.12949e-19	161	193.98	7.39	9.36
chr15	27111749	27113080	1332	*	8.64624	9.47217	6.509	2.8356	2.78171e-21	8.14166e-19	688.98	731.51	104.92	77.23
chr22	38220528	38221724	1197	*	9.5404	10.3618	7.43843	2.80186	2.80648e-21	8.19845e-19	1261.92	1369.73	144.08	202.83
chr2	118715568	118716219	652	*	7.8827	5.04238	8.77829	-3.49269	2.80834e-21	8.19845e-19	34.81	31.1	340.62	537.51
chr11	32460469	32460957	489	*	7.66219	8.52567	5.1929	3.15415	2.87514e-21	8.38265e-19	371.32	365.75	45.07	28.08
chr10	31410150	31410848	699	*	8.22039	5.65983	9.09262	-3.24097	2.95516e-21	8.6049e-19	50.77	50.35	438.15	653.75
chr10	128793777	128794319	543	*	7.79935	5.1077	8.68313	-3.36103	3.03812e-21	8.83512e-19	30.46	38.5	352.44	469.64
chr14	94854974	94855379	406	*	7.07851	7.95601	4.45975	3.29433	3.06516e-21	8.90235e-19	256.74	239.89	22.17	21.84
chr2	25601559	25601940	382	*	7.38187	8.25946	4.76212	3.29221	3.08328e-21	8.94353e-19	291.55	321.33	33.99	20.28
chr5	136941829	136942452	624	*	8.09857	5.48104	8.97596	-3.29265	3.11101e-21	9.01244e-19	47.87	41.46	406.38	600.7
chr6	159614952	159615496	545	*	8.14962	5.36367	9.04104	-3.44615	3.14455e-21	9.09797e-19	27.56	54.79	440.36	613.18
chr8	55379159	55380148	990	*	8.0364	8.86656	5.86583	2.86844	3.21433e-21	9.28803e-19	465.61	467.93	62.8	53.83
chr6	37212354	37213002	649	*	10.0611	7.83215	10.8984	-2.92632	3.23291e-21	9.32982e-19	227.73	228.04	1502.85	2314.65
chr11	18478991	18479405	415	*	7.82061	8.67207	5.46717	3.04803	3.50211e-21	1.00939e-18	430.79	385	36.2	52.27
chr6	74999568	75000054	487	*	8.53015	5.98022	9.40139	-3.2312	3.52018e-21	1.01331e-18	52.22	74.04	535.68	816.8
chr20	5296489	5297813	1325	*	8.04454	8.8842	5.79558	2.9443	3.55036e-21	1.0197e-18	483.01	462	64.28	46.81
chr10	28012222	28012889	668	*	9.10227	6.4609	9.98176	-3.31472	3.55137e-21	1.0197e-18	72.52	103.65	723.35	1298.92
chr10	75878418	75878926	509	*	8.54069	9.36352	6.42746	2.81278	3.55731e-21	1.02011e-18	659.97	657.47	74.63	97.52
chr20	62641757	62642589	833	*	8.1153	5.50765	8.99181	-3.28406	3.61703e-21	1.03593e-18	39.16	51.83	416.72	601.48
chr11	61136809	61137593	785	*	7.7639	4.94242	8.65807	-3.47464	3.63481e-21	1.03971e-18	33.36	28.13	326.58	481.34
chr15	39881921	39882218	298	*	8.29852	5.57275	9.18513	-3.38984	3.65178e-21	1.04325e-18	50.77	44.42	428.54	735.67
chr6	27261616	27261868	253	*	6.65876	7.57846	3.45161	3.80081	3.66449e-21	1.04556e-18	201.62	180.66	13.3	8.58
chr22	50118317	50118968	652	*	8.48358	9.30666	6.36846	2.81452	3.67495e-21	1.0466e-18	616.46	650.06	72.41	92.84
chr9	32899223	32899571	349	*	7.13568	8.01138	4.53707	3.27665	3.67735e-21	1.0466e-18	248.03	268.02	20.69	25.74
chr12	132905627	132906242	616	*	8.34147	9.1624	6.24266	2.79689	3.68623e-21	1.04781e-18	572.94	573.06	82.01	69.43
chr5	180596440	180597483	1044	*	10.7074	11.5494	8.43768	2.96593	3.69831e-21	1.04993e-18	3034.42	2960.09	252.69	440.78
chr1	59605059	59605500	442	*	7.791	8.63131	5.53643	2.95174	3.72637e-21	1.05657e-18	384.38	408.7	42.12	50.71
chr14	21100710	21101794	1085	*	9.73335	10.5787	7.4352	2.99366	3.76681e-21	1.0667e-18	1377.96	1680.69	130.04	216.1
chr8	11584068	11584942	875	*	7.44545	8.30034	5.05988	3.07607	3.77331e-21	1.06721e-18	298.8	331.7	34.73	31.99
chr6	25715008	25715405	398	*	6.46144	7.41118	2.59329	4.31688	3.83222e-21	1.08252e-18	149.4	191.02	7.39	4.68
chrX	130191821	130192780	960	*	6.77899	7.68124	3.84692	3.57028	3.84337e-21	1.08432e-18	197.27	213.23	15.52	13.26
chr3	10636583	10637008	426	*	7.42336	8.27895	5.03121	3.08362	3.92103e-21	1.10486e-18	317.66	303.56	30.29	35.11
chr11	35240543	35240946	404	*	7.65711	4.45543	8.5765	-3.798	3.9378e-21	1.10821e-18	26.11	17.77	283.72	479.78
chr14	36994433	36995099	667	*	7.10041	7.98254	4.42843	3.33905	4.11522e-21	1.1567e-18	240.78	265.06	25.12	17.94
chr11	45429995	45430348	354	*	6.78651	7.69487	3.76431	3.64549	4.12972e-21	1.15934e-18	223.37	191.02	16.26	10.92
chr15	95906863	95907475	613	*	7.72364	4.41002	8.6492	-3.89078	4.14145e-21	1.1612e-18	20.31	22.21	275.6	527.37
chr22	21449346	21450152	807	*	7.70325	4.87345	8.59804	-3.48163	4.33225e-21	1.2132e-18	29.01	29.62	315.5	459.5
chr16	23846812	23848040	1229	*	9.55223	10.3543	7.58844	2.66074	4.36401e-21	1.22058e-18	1269.17	1349	175.85	209.08
chr3	64058950	64059459	510	*	8.58571	5.82276	9.47532	-3.42357	4.47192e-21	1.24922e-18	39.16	74.04	547.5	876.09
chr18	46547916	46548509	594	*	8.09296	8.91722	5.96873	2.82237	4.49767e-21	1.25487e-18	498.97	467.93	62.06	63.19
chr16	28634260	28635095	836	*	8.24945	9.06873	6.16308	2.78428	4.52732e-21	1.26159e-18	548.28	525.68	73.89	69.43
chr5	16461885	16462322	438	*	8.95433	6.4422	9.82199	-3.19376	4.55925e-21	1.26893e-18	110.24	63.67	747.73	1062.54
chr8	29183011	29183452	442	*	6.93267	7.83359	4.01932	3.55086	4.58436e-21	1.27436e-18	205.97	250.25	19.95	12.48
chr15	71199172	71199730	559	*	7.37278	4.25197	8.28737	-3.731	4.61843e-21	1.28226e-18	18.86	19.25	265.99	358.86
chr6	89991430	89992001	572	*	7.57054	8.41845	5.24933	3.01545	4.65614e-21	1.29115e-18	346.67	337.62	34.73	41.35
chr10	118368610	118369641	1032	*	9.05308	9.85448	7.0941	2.65539	4.74843e-21	1.31513e-18	967.47	884.03	135.95	137.3
chr6	91176121	91176649	529	*	7.06639	7.95539	4.31108	3.41846	4.91229e-21	1.35885e-18	266.89	229.52	15.52	24.18
chr19	479985	480512	528	*	8.14803	8.96955	6.04471	2.8011	4.97326e-21	1.37404e-18	490.26	512.35	66.5	65.53
chr11	102842229	102843119	891	*	9.2721	6.93532	10.1217	-3.0291	5.00263e-21	1.38048e-18	120.39	124.39	861.52	1366.79
chrX	20396243	20396815	573	*	7.45196	8.31109	5.02573	3.11314	5.01978e-21	1.38353e-18	285.75	349.47	34.73	30.43
chr17	71606514	71606876	363	*	6.91888	7.80882	4.15186	3.4236	5.16772e-21	1.42159e-18	223.37	225.08	19.95	15.6
chr4	2443218	2444107	890	*	9.03524	9.83454	7.09041	2.64069	5.17044e-21	1.42159e-18	908	918.09	134.47	138.08
chr2	69465559	69466227	669	*	8.765	6.30724	9.62733	-3.14354	5.24702e-21	1.44091e-18	73.97	84.4	606.61	975.17
chr16	2346529	2347135	607	*	8.08813	8.91807	5.9192	2.86691	5.28077e-21	1.44842e-18	471.41	496.06	53.94	67.09
chr20	13094329	13094845	517	*	8.41105	5.83578	9.28464	-3.2518	5.36616e-21	1.47006e-18	60.92	53.31	476.57	770.77
chr5	143156468	143157011	544	*	8.15233	5.55153	9.02823	-3.27538	5.48095e-21	1.4997e-18	46.42	47.39	411.55	632.69
chr15	39887635	39888475	841	*	9.51556	7.23268	10.3591	-2.9772	5.58913e-21	1.52746e-18	131.99	168.81	1058.06	1568.85
chrX	152915143	152915443	301	*	6.74178	7.6439	3.81151	3.56801	5.59873e-21	1.52824e-18	203.07	196.94	14.04	14.04
chr17	29821287	29821660	374	*	6.57373	7.49416	3.35365	3.81054	5.75923e-21	1.57016e-18	176.96	183.62	11.08	9.36
chr2	131648545	131649259	715	*	7.35717	8.24178	4.65569	3.36263	5.76836e-21	1.57076e-18	294.45	310.96	33.25	17.16
chr9	95040361	95040798	438	*	7.67515	4.72393	8.57873	-3.58671	5.79409e-21	1.57587e-18	21.76	31.1	304.41	460.28
chr10	120353908	120354388	481	*	8.00995	8.83664	5.86685	2.83985	5.84066e-21	1.58541e-18	461.25	453.12	61.33	55.39
chr5	170008170	170008624	455	*	6.59341	7.52432	3.17496	3.96688	5.84314e-21	1.58541e-18	166.81	201.39	11.82	6.24
chr1	16436104	16436431	328	*	7.44905	8.30283	5.074	3.06398	5.85887e-21	1.58778e-18	317.66	313.93	36.94	30.43
chr19	17908110	17908648	539	*	9.27788	10.1189	7.01714	2.95634	5.92035e-21	1.60253e-18	1071.91	1152.05	96.79	162.27
chr8	110986106	110987153	1048	*	8.08843	8.93679	5.76321	3.01567	6.1481e-21	1.66219e-18	504.77	475.33	66.5	42.13
chr15	81174202	81174559	358	*	7.34482	4.13897	8.26444	-3.8009	6.2239e-21	1.68068e-18	14.5	20.73	260.82	354.18
chr2	20591751	20592168	418	*	7.47092	8.31971	5.14186	3.02117	6.32788e-21	1.70673e-18	316.21	322.81	34.73	35.89
chr20	31979717	31980185	469	*	7.96046	5.13835	8.85468	-3.47343	6.54532e-21	1.76328e-18	30.46	39.98	351.7	574.18
chr18	13800648	13801507	860	*	8.34652	9.17089	6.22143	2.82291	6.66563e-21	1.79356e-18	603.4	549.37	65.76	83.47
chr7	150088777	150089433	657	*	7.37873	3.54779	8.32713	-4.28623	6.68101e-21	1.79557e-18	14.5	8.88	232.74	409.57
chr11	123951307	123951617	311	*	6.56631	7.49259	3.23912	3.89528	6.72672e-21	1.80571e-18	195.82	164.37	11.08	7.8
chr4	74757522	74758249	728	*	8.6137	5.89377	9.49983	-3.38266	6.77328e-21	1.81606e-18	49.32	69.6	515.73	932.26
chr12	94203	95293	1091	*	7.45715	8.30628	5.12498	3.02349	6.87601e-21	1.83969e-18	316.21	316.89	35.47	34.33
chr15	81115577	81115973	397	*	7.5421	4.50235	8.45161	-3.65877	6.87763e-21	1.83969e-18	27.56	17.77	285.94	414.25
chr18	75611889	75612591	703	*	8.54124	9.35156	6.52036	2.71743	6.98814e-21	1.86705e-18	684.63	621.93	93.1	90.5
chr17	13214473	13215040	568	*	7.58493	4.5062	8.49691	-3.69319	7.02503e-21	1.8747e-18	21.76	23.69	277.07	445.46
chr17	49474980	49475436	457	*	7.4616	8.32909	4.95117	3.19403	7.05748e-21	1.87981e-18	329.26	313.93	23.64	38.23
chr11	64257302	64257795	494	*	7.61143	8.47119	5.17907	3.11636	7.06077e-21	1.87981e-18	332.16	377.6	43.59	28.86
chr10	89353447	89353829	383	*	7.56332	4.24852	8.48895	-3.88594	7.3026e-21	1.94192e-18	23.21	14.81	264.51	454.04
chr19	51297023	51298651	1629	*	9.24444	10.0421	7.31084	2.6281	7.36364e-21	1.95586e-18	1066.11	1042.47	166.98	150.57
chr18	65605713	65606600	888	*	7.77899	4.7971	8.68467	-3.60964	7.40555e-21	1.96469e-18	31.91	23.69	308.85	514.11
chr14	29235636	29236182	547	*	7.88633	8.72681	5.6303	2.95143	7.47118e-21	1.97978e-18	409.04	438.31	42.12	56.95
chr5	154403635	154404003	369	*	6.54673	7.48774	2.90532	4.13579	7.49824e-21	1.98464e-18	182.76	176.21	11.08	3.9
chr16	3230417	3230664	248	*	6.94013	7.829	4.18645	3.41142	7.51085e-21	1.98566e-18	204.52	250.25	18.47	17.94
chr15	81151747	81152022	276	*	7.23816	3.63811	8.17741	-4.11195	7.52491e-21	1.98706e-18	13.05	11.85	234.96	344.04
chr4	159717902	159718264	363	*	7.0912	7.98358	4.29297	3.44768	7.61077e-21	2.00624e-18	223.37	282.83	24.38	14.82
chr3	10599430	10600282	853	*	8.34452	9.17188	6.19615	2.84371	7.62159e-21	2.00624e-18	565.69	587.87	84.23	62.41
chr17	70706863	70707400	538	*	7.47158	4.00416	8.40484	-4.00586	7.6241e-21	2.00624e-18	23.21	8.88	266.73	411.13
chr6	40363048	40363467	420	*	7.67958	8.54786	5.16096	3.19586	7.73246e-21	2.0324e-18	391.63	356.87	45.81	25.74
chr3	24870480	24871767	1288	*	9.21645	10.0257	7.20305	2.71004	7.98254e-21	2.0957e-18	997.93	1086.9	129.3	165.39
chr20	296944	297480	537	*	7.72103	4.68209	8.63048	-3.659	8.15638e-21	2.13678e-18	23.21	28.13	293.33	499.29
chr11	189538	190361	824	*	9.33962	10.1372	7.40594	2.62809	8.15786e-21	2.13678e-18	1057.4	1194.99	170.68	168.51
chr6	39241073	39241856	784	*	7.07482	7.96153	4.34781	3.38422	8.38134e-21	2.19279e-18	236.43	262.1	25.12	15.6
chr21	32726792	32727632	841	*	9.1116	9.93456	6.99733	2.81137	8.54732e-21	2.23364e-18	941.37	1015.82	104.18	151.35
chr15	63400079	63400750	672	*	9.90851	7.62757	10.7519	-2.97351	8.8798e-21	2.31785e-18	205.97	189.54	1315.92	2132.88
chr5	56327869	56328447	579	*	7.54971	8.40938	5.11822	3.11912	8.90436e-21	2.32159e-18	339.41	340.58	27.34	42.13
chr14	101337555	101339307	1753	*	9.8744	10.6677	7.96898	2.59898	8.92602e-21	2.32457e-18	1625.99	1627.38	232.74	268.37
chr2	216625275	216625627	353	*	6.58619	7.50717	3.35656	3.81653	8.96151e-21	2.33113e-18	162.45	201.39	10.34	10.14
chr11	76902857	76903479	623	*	7.93652	8.78559	5.6049	3.02036	9.05992e-21	2.35403e-18	423.54	459.04	59.11	38.23
chr4	3201642	3202215	574	*	7.79122	4.87196	8.69256	-3.55497	9.13099e-21	2.36979e-18	31.91	26.65	311.8	515.67
chr16	89665880	89666199	320	*	7.56922	8.42779	5.14851	3.10441	9.20157e-21	2.3845e-18	346.67	342.06	42.85	28.08
chr7	42399479	42400000	522	*	8.84528	6.34393	9.7119	-3.18135	9.2087e-21	2.3845e-18	91.38	71.08	628.77	1048.5
chr14	85953402	85954069	668	*	9.33688	6.97952	10.1888	-3.04688	9.23747e-21	2.38922e-18	110.24	142.16	905.85	1428.42
chr10	43571857	43573290	1434	*	9.6091	10.4015	7.70967	2.59266	9.2527e-21	2.39043e-18	1357.65	1347.51	200.23	218.44
chr11	65056208	65056495	288	*	7.66604	4.67782	8.57214	-3.61337	9.33029e-21	2.40774e-18	30.46	20.73	297.02	464.18
chr11	64167585	64167996	412	*	7.49377	8.34205	5.16926	3.0146	9.35109e-21	2.41036e-18	335.06	313.93	38.42	33.55
chr15	81103975	81104652	678	*	7.83477	4.97952	8.73147	-3.50048	9.45931e-21	2.43549e-18	27.56	35.54	325.84	524.25
chr14	54911408	54911845	438	*	8.29641	5.68251	9.17348	-3.28544	9.48447e-21	2.43771e-18	44.97	57.75	442.58	712.26
chr1	175808922	175809805	884	*	7.89857	8.72866	5.72848	2.86487	9.48945e-21	2.43771e-18	427.89	420.54	56.89	49.15
chr8	108156202	108156679	478	*	7.64165	4.24852	8.5713	-3.94685	9.51863e-21	2.44244e-18	23.21	14.81	263.04	497.72
chr15	45908968	45909477	510	*	7.46093	8.3102	5.12753	3.0242	9.65339e-21	2.47422e-18	304.6	330.22	33.25	36.67
chr6	27638195	27638450	256	*	6.88815	7.77508	4.15854	3.38989	9.69764e-21	2.48276e-18	223.37	214.71	16.99	18.72
chr14	75352624	75353133	510	*	9.44846	7.15985	10.2927	-2.98082	9.73022e-21	2.48778e-18	131.99	154	981.95	1526.72
chr6	28556990	28557654	665	*	9.65434	10.4829	7.49617	2.85429	9.73919e-21	2.48778e-18	1351.85	1510.4	141.86	219.22
chr7	115872861	115873505	645	*	8.04983	5.52857	8.91836	-3.19981	9.85129e-21	2.51359e-18	46.42	45.9	399.73	567.94
chr1	17033739	17034737	999	*	9.25203	10.0496	7.31867	2.62757	1.00025e-20	2.5493e-18	1032.75	1086.9	149.99	169.29
chr15	72630989	72631695	707	*	8.27452	5.72228	9.14598	-3.22858	1.00837e-20	2.56711e-18	49.32	56.27	441.84	691.2
chr6	168325618	168326191	574	*	7.78255	5.04238	8.67033	-3.39776	1.00953e-20	2.56717e-18	34.81	31.1	328.8	486.02
chr10	74312588	74313106	519	*	7.68027	4.59456	8.5927	-3.69588	1.02885e-20	2.61339e-18	26.11	22.21	282.99	489.14
chr4	26558698	26559302	605	*	8.52722	6.15129	9.3811	-3.06377	1.03087e-20	2.6156e-18	71.07	71.08	538.63	794.96
chr9	37027512	37028029	518	*	9.84225	10.6377	7.92287	2.61308	1.04988e-20	2.66085e-18	1570.88	1615.54	221.66	263.68
chr21	40449738	40450244	507	*	7.90124	5.01367	8.80032	-3.52836	1.05223e-20	2.66382e-18	26.11	38.5	336.18	555.45
chr9	89505970	89506510	541	*	7.53621	4.35782	8.45424	-3.77289	1.05872e-20	2.67727e-18	21.76	19.25	263.04	438.43
chr10	101294638	101295552	915	*	9.05215	9.85641	7.0736	2.6739	1.06616e-20	2.69308e-18	919.61	934.38	121.17	148.23
chr18	55094742	55096339	1598	*	8.6624	9.47138	6.65105	2.70659	1.07958e-20	2.723e-18	655.62	764.09	102.7	98.3
chr4	48987705	48988639	935	*	7.77153	8.60446	5.57853	2.88736	1.08063e-20	2.723e-18	375.68	402.77	48.77	46.81
chr9	124963986	124964348	363	*	7.58926	8.43146	5.31849	2.96375	1.08161e-20	2.723e-18	333.61	356.87	37.68	42.13
chr14	96384667	96385355	689	*	7.07358	7.9692	4.2328	3.48203	1.09481e-20	2.75319e-18	250.93	250.25	25.12	12.48
chr12	60298562	60299470	909	*	8.98433	6.44797	9.8543	-3.21372	1.09882e-20	2.76021e-18	76.88	97.73	670.15	1181.12
chr11	45273824	45274437	614	*	8.29297	9.10592	6.2532	2.73537	1.12318e-20	2.81828e-18	552.64	549.37	76.1	76.45
chr11	30940875	30941303	429	*	6.48798	7.41629	3.12156	3.92391	1.12637e-20	2.82317e-18	162.45	179.18	9.61	7.8
chr12	108306148	108306832	685	*	7.57585	8.43184	5.17989	3.08054	1.13006e-20	2.82929e-18	324.91	365.75	42.85	29.65
chr2	84461180	84461684	505	*	6.66271	7.59953	3.11814	4.06243	1.15876e-20	2.89794e-18	145.05	242.85	10.34	7.02
chr4	168154832	168156036	1205	*	8.03838	8.86903	5.86379	2.86826	1.16481e-20	2.90985e-18	459.8	475.33	65.76	50.71
chr1	212098372	212098787	416	*	7.35596	8.20989	4.97958	3.06462	1.17233e-20	2.92543e-18	290.1	302.08	29.55	33.55
chr14	100007987	100008363	377	*	7.46414	8.31533	5.11307	3.04085	1.17552e-20	2.93016e-18	337.96	299.12	31.77	37.45
chr15	81132897	81133441	545	*	8.50469	5.94704	9.37665	-3.2335	1.18218e-20	2.94351e-18	47.87	75.52	528.29	801.2
chr15	61536075	61536655	581	*	7.35759	8.23861	4.69852	3.32098	1.27144e-20	3.16231e-18	287.2	316.89	33.99	17.94
chr2	232550083	232550294	212	*	7.15048	8.02308	4.58599	3.24091	1.28728e-20	3.19819e-18	259.64	260.62	19.95	28.08
chr7	83116207	83116721	515	*	6.67409	7.57972	3.69289	3.60821	1.30609e-20	3.24139e-18	185.66	196.94	11.82	14.04
chr3	150867030	150867768	739	*	7.7758	5.03973	8.66326	-3.39183	1.31782e-20	3.26691e-18	40.61	25.17	344.31	466.52
chr10	134368851	134369201	351	*	7.2358	8.09906	4.76868	3.14747	1.32857e-20	3.28996e-18	259.64	288.75	29.55	24.96
chr6	167764287	167765207	921	*	8.32711	9.15317	6.1889	2.83329	1.35045e-20	3.3405e-18	497.52	641.18	69.45	76.45
chr5	54522285	54523590	1306	*	9.89338	10.6956	7.92847	2.65923	1.35512e-20	3.34839e-18	1559.27	1757.69	215.75	271.49
chr6	90237354	90237747	394	*	6.43939	7.38533	2.67435	4.22473	1.36889e-20	3.37875e-18	155.2	179.18	8.87	3.9
chr15	81082253	81082914	662	*	8.28876	5.74237	9.15967	-3.22191	1.38464e-20	3.41391e-18	49.32	57.75	444.06	699.78
chr1	121260733	121261643	911	*	8.79613	9.59623	6.84591	2.64394	1.4023e-20	3.45369e-18	749.9	798.14	113.05	117.02
chr14	72209187	72209726	540	*	8.64965	6.06014	9.52453	-3.2611	1.43921e-20	3.54076e-18	62.37	71.08	529.03	943.96
chr17	73719170	73719702	533	*	8.28359	9.09643	6.24462	2.73362	1.46478e-20	3.59976e-18	543.93	550.85	78.32	73.33
chr11	10377712	10378124	413	*	7.37998	3.94029	8.31192	-3.98006	1.47012e-20	3.60897e-18	18.86	11.85	241.61	393.97
chr11	119706446	119706910	465	*	6.68223	7.59761	3.54844	3.73093	1.4747e-20	3.6163e-18	169.71	217.68	14.04	9.36
chr20	2311696	2312178	483	*	6.91643	7.8311	3.79445	3.71826	1.48053e-20	3.62666e-18	243.68	211.75	19.95	7.8
chr13	34213213	34213612	400	*	9.03043	6.70983	9.87828	-3.00956	1.49787e-20	3.66518e-18	114.59	94.77	743.3	1138.99
chr3	13926966	13927260	295	*	6.66244	7.57972	3.49689	3.75531	1.51763e-20	3.70955e-18	185.66	196.94	14.78	7.8
chr11	61464581	61465091	511	*	8.26325	9.07807	6.20985	2.74828	1.58787e-20	3.87704e-18	568.59	512.35	73.15	74.89
chr3	12617794	12618261	468	*	8.42108	5.857	9.29363	-3.23761	1.62252e-20	3.9574e-18	50.77	65.15	476.57	778.57
chr15	39596319	39597077	759	*	9.93485	7.78094	10.7629	-2.848	1.63498e-20	3.98351e-18	208.87	231	1400.89	2074.37
chrX	101410138	101411197	1060	*	8.1221	8.95702	5.91284	2.90352	1.65043e-20	4.01684e-18	480.11	513.83	49.5	70.99
chr3	3841862	3842871	1010	*	7.68392	8.53922	5.29456	3.07622	1.66781e-20	4.05478e-18	322.01	422.02	33.25	45.25
chr13	39116748	39117125	378	*	6.71111	7.61951	3.68828	3.63963	1.75378e-20	4.25701e-18	169.71	223.6	13.3	12.48
chr1	85354415	85354778	364	*	7.03217	7.92684	4.20417	3.46842	1.75474e-20	4.25701e-18	236.43	250.25	24.38	12.48
chr19	4145575	4146123	549	*	8.53411	9.3399	6.545	2.68297	1.79251e-20	4.344e-18	620.81	675.24	92.36	94.4
chr16	18864948	18865456	509	*	7.40068	2.36101	8.37858	-5.07919	1.79455e-20	4.34428e-18	4.35	5.92	248.26	417.37
chr7	50237072	50237568	497	*	6.84241	7.73072	4.09584	3.40192	1.80653e-20	4.36862e-18	220.47	204.35	16.26	17.94
chr11	74636251	74636958	708	*	7.99507	5.1077	8.89413	-3.52444	1.89213e-20	4.57074e-18	30.46	38.5	339.14	612.4
chr4	113444892	113445689	798	*	8.23699	9.06653	6.07135	2.85793	1.90613e-20	4.59967e-18	555.54	516.79	78.32	56.17
chr10	61781026	61781665	640	*	6.83753	7.74186	3.8754	3.5835	1.9105e-20	4.60531e-18	204.52	223.6	19.21	10.14
chr11	11004273	11004622	350	*	6.60389	7.51731	3.50215	3.70299	1.92095e-20	4.62559e-18	181.31	185.1	13.3	9.36
chr16	88534812	88535529	718	*	8.65012	9.45637	6.65781	2.68602	1.92428e-20	4.62869e-18	649.82	755.2	99.75	102.2
chr8	65715934	65716298	365	*	7.77987	5.01164	8.6699	-3.41987	1.97638e-20	4.74899e-18	30.46	34.06	319.19	495.38
chr21	33251210	33252037	828	*	7.06698	7.9503	4.38091	3.34566	1.99366e-20	4.78544e-18	208.87	285.79	22.17	19.5
chr11	69919949	69920487	539	*	8.03202	8.85064	5.95065	2.77534	2.11474e-20	5.06729e-18	459.8	463.49	62.06	61.63
chr21	43042968	43043430	463	*	7.47627	8.32767	5.12327	3.03879	2.11555e-20	5.06729e-18	288.65	353.91	36.94	32.77
chr20	56193136	56193561	426	*	7.61474	8.47658	5.16179	3.13087	2.15427e-20	5.1546e-18	346.67	365.75	45.07	26.52
chr7	35225239	35226637	1399	*	8.91131	9.72532	6.86383	2.74185	2.16414e-20	5.17275e-18	760.05	932.89	103.44	129.5
chr1	30946747	30947326	580	*	7.80247	8.6373	5.59396	2.90127	2.17271e-20	5.18245e-18	368.42	427.95	44.33	52.27
chr12	106979749	106980225	477	*	7.1294	7.99899	4.59698	3.20523	2.17277e-20	5.18245e-18	246.58	265.06	27.34	21.06
chr14	75985110	75985413	304	*	6.47115	7.40437	3.00474	4.0041	2.24613e-20	5.35181e-18	155.2	183.62	5.91	10.14
chr2	170562377	170563048	672	*	7.60245	4.36314	8.52396	-3.81972	2.25954e-20	5.3781e-18	14.5	26.65	269.69	466.52
chr9	138144924	138145936	1013	*	8.20204	9.08226	5.55219	3.31087	2.27579e-20	5.41112e-18	559.89	524.2	65.76	28.08
chrX	592830	593745	916	*	8.97273	9.77657	6.99707	2.66892	2.29554e-20	5.45236e-18	806.47	947.7	118.96	136.52
chr2	45155711	45157093	1383	*	8.72776	9.52981	6.76434	2.65583	2.30247e-20	5.46279e-18	752.8	725.58	116	101.42
chr20	37736212	37736863	652	*	7.51477	8.37761	5.05182	3.13993	2.30475e-20	5.46279e-18	339.41	325.77	41.38	24.96
chr14	78448744	78449029	286	*	6.59381	7.50644	3.50478	3.69222	2.32301e-20	5.50031e-18	171.16	192.5	12.56	10.14
chr10	43761127	43762733	1607	*	8.89724	9.69416	6.96825	2.62085	2.34078e-20	5.53662e-18	790.51	866.26	125.61	124.82
chr2	200636731	200637056	326	*	6.60678	7.51731	3.55098	3.6639	2.36158e-20	5.57999e-18	181.31	185.1	13.3	10.14
chr14	80780024	80780605	582	*	7.78268	4.79788	8.68855	-3.60541	2.3891e-20	5.63915e-18	30.46	25.17	297.02	528.15
chr19	50833999	50834257	259	*	7.91273	8.7387	5.77522	2.83139	2.41475e-20	5.69375e-18	427.89	426.47	50.24	59.29
chr9	92788048	92788495	448	*	7.75111	8.58398	5.55858	2.88527	2.43775e-20	5.74202e-18	404.69	362.79	44.33	49.93
chr11	82342928	82343643	716	*	7.0377	7.90944	4.48244	3.22659	2.44287e-20	5.74812e-18	232.08	248.77	23.64	21.06
chr4	128225491	128225973	483	*	7.9687	4.83808	8.88389	-3.72851	2.46706e-20	5.79903e-18	26.11	31.1	305.89	638.93
chr12	33591756	33593014	1259	*	8.1021	8.92078	6.02029	2.77539	2.47267e-20	5.80619e-18	455.45	513.83	64.28	65.53
chr18	29077533	29078761	1229	*	8.00327	8.82559	5.89399	2.80207	2.48852e-20	5.83736e-18	440.95	466.45	63.54	55.39
chr8	41363645	41364084	440	*	7.46894	4.50909	8.37312	-3.58602	2.51763e-20	5.89955e-18	17.41	28.13	279.29	383.83
chr5	8857160	8857603	444	*	7.20755	3.45344	8.15307	-4.21513	2.53389e-20	5.93154e-18	14.5	7.4	226.83	342.48
chr10	26504811	26505788	978	*	8.26349	9.1103	5.95214	3.00098	2.56401e-20	5.99585e-18	533.78	571.58	45.81	78.01
chr4	148246640	148247231	592	*	8.36505	5.71979	9.24488	-3.30825	2.58265e-20	6.0296e-18	58.02	47.39	441.1	772.33
chr11	9033617	9034080	464	*	7.52838	4.30807	8.44883	-3.80219	2.58376e-20	6.0296e-18	17.41	22.21	254.17	444.68
chr7	31787143	31787573	431	*	7.14268	8.00698	4.66511	3.15457	2.60772e-20	6.07926e-18	252.38	262.1	27.34	23.4
chr19	51944144	51945371	1228	*	7.56033	8.40231	5.29152	2.95925	2.61182e-20	6.08257e-18	356.82	319.85	36.2	42.13
chr16	84029393	84029818	426	*	7.70422	8.53898	5.49629	2.89934	2.64536e-20	6.15435e-18	398.88	345.02	45.81	44.47
chr7	96645670	96646829	1160	*	7.71473	8.54949	5.50674	2.89883	2.66031e-20	6.1828e-18	351.02	398.33	48.03	42.91
chr22	45957956	45959451	1496	*	8.07311	5.53188	8.94354	-3.21506	2.69975e-20	6.26803e-18	36.26	56.27	415.98	568.72
chr2	67980112	67980581	470	*	8.618	6.08796	9.48738	-3.20293	2.82491e-20	6.5519e-18	79.78	56.27	543.07	892.47
chr9	136387631	136388230	600	*	7.45525	8.31705	5.0028	3.12941	2.86497e-20	6.63803e-18	301.7	336.14	39.16	24.96
chr10	101691010	101691328	319	*	7.20271	8.0643	4.75232	3.12995	2.93056e-20	6.78308e-18	246.58	288.75	26.6	27.3
chr3	50010588	50011138	551	*	8.17303	5.81812	9.02464	-3.03994	3.00234e-20	6.94213e-18	56.57	56.27	444.06	597.58
chr9	114825466	114825853	388	*	7.55157	4.41105	8.46736	-3.7355	3.03847e-20	7.01852e-18	18.86	23.69	260.08	447.8
chr4	178039691	178040205	515	*	8.40646	5.87494	9.27597	-3.20496	3.06494e-20	7.07247e-18	52.22	65.15	470.66	769.21
chr5	95962648	95963092	445	*	8.41062	5.83731	9.28403	-3.24286	3.07028e-20	7.07759e-18	55.12	59.23	458.1	788.71
chr5	6454711	6455203	493	*	6.79363	7.70274	3.75992	3.64102	3.09789e-20	7.13399e-18	185.66	231	17.73	9.36
chrX	109115068	109115852	785	*	8.18975	5.5755	9.06685	-3.28021	3.2039e-20	7.36802e-18	42.06	53.31	407.12	665.45
chr11	133800478	133801044	567	*	8.26301	9.08327	6.1693	2.78734	3.20601e-20	7.36802e-18	523.63	561.22	62.8	81.13
chr21	34451231	34451653	423	*	7.75886	8.58976	5.58227	2.86892	3.23881e-20	7.43585e-18	398.88	371.68	44.33	51.49
chrX	136648816	136649681	866	*	6.96682	7.84112	4.38377	3.25166	3.25709e-20	7.47027e-18	233.53	225.08	20.69	21.06
chr4	3625364	3626124	761	*	8.40887	9.25821	6.07484	3.01829	3.26132e-20	7.4724e-18	633.86	590.83	86.45	48.37
chr1	14609028	14609731	704	*	7.17881	8.06145	4.50084	3.33414	3.37158e-20	7.71724e-18	226.28	308	27.34	17.94
chr7	17474422	17474905	484	*	7.65719	4.41002	8.57914	-3.82136	3.45252e-20	7.89454e-18	20.31	22.21	258.6	506.31
chr5	8508387	8508841	455	*	6.82256	7.71659	4.00288	3.46521	3.46869e-20	7.92352e-18	205.97	214.71	12.56	19.5
chr10	123357320	123358406	1087	*	10.0145	10.8118	8.08292	2.62288	3.53149e-20	8.05886e-18	1784.1	1811	235.7	306.59
chr10	44735910	44736759	850	*	8.47625	9.28746	6.44895	2.71989	3.61138e-20	8.23289e-18	567.14	682.64	84.23	90.5
chr19	51084102	51084901	800	*	6.71737	7.61217	3.88752	3.47054	3.6365e-20	8.28184e-18	194.37	196.94	14.78	14.82
chr16	66070640	66071254	615	*	8.66639	6.06374	9.54246	-3.2696	3.73031e-20	8.48696e-18	46.42	87.37	590.35	901.05
chr17	56725674	56726124	451	*	6.91833	7.80862	4.14683	3.41571	3.73552e-20	8.49029e-18	226.28	222.12	22.17	13.26
chr7	35293328	35294148	821	*	8.53703	9.35419	6.46643	2.76209	3.77524e-20	8.57199e-18	641.11	667.83	101.96	74.89
chr19	42436385	42436682	298	*	7.59131	8.43461	5.31101	2.96671	3.80198e-20	8.62408e-18	332.16	359.83	45.07	34.33
chr19	51161211	51162595	1385	*	11.2188	12.0149	9.29484	2.61469	3.82575e-20	8.66932e-18	3991.74	4285.39	527.55	728.64
chr17	67963994	67964613	620	*	8.02628	5.33587	8.90996	-3.34815	3.89685e-20	8.82161e-18	31.91	48.87	374.61	587.44
chr15	40204350	40204659	310	*	6.46527	7.39223	3.12498	3.89475	3.93018e-20	8.88821e-18	149.4	186.58	8.87	8.58
chr5	146257341	146258668	1328	*	8.69867	9.49537	6.77114	2.61804	3.95921e-20	8.94494e-18	720.89	722.62	111.57	106.88
chr20	24007878	24008257	380	*	6.674	7.57435	3.76868	3.53369	4.06005e-20	9.16364e-18	182.76	198.43	14.78	12.48
chr14	105633642	105635813	2172	*	10.0367	10.8367	8.0874	2.64068	4.08367e-20	9.20779e-18	1769.59	1888	233.48	310.49
chr1	48050862	48051183	322	*	6.74239	7.65076	3.72003	3.62985	4.12364e-20	9.28867e-18	182.76	219.16	16.99	9.36
chr6	27559449	27560808	1360	*	10.0811	10.8783	8.15024	2.62174	4.13402e-20	9.30282e-18	1818.91	1945.75	246.78	321.41
chr4	100222035	100222890	856	*	8.27338	5.65854	9.15053	-3.27841	4.32093e-20	9.71378e-18	55.12	45.9	419.68	716.94
chr20	17295994	17296604	611	*	7.57746	8.41578	5.33982	2.92551	4.46223e-20	1.00215e-17	336.51	346.5	44.33	36.67
chr5	158061638	158062182	545	*	7.78349	4.97883	8.67637	-3.44747	4.57918e-20	1.0274e-17	29.01	34.06	309.58	508.65
chr8	144235243	144235740	498	*	7.06079	7.93041	4.52806	3.20242	4.5997e-20	1.03098e-17	249.48	238.41	25.86	20.28
chr22	45551301	45551825	525	*	8.76346	6.33451	9.62287	-3.1083	4.62031e-20	1.03458e-17	71.07	90.33	596.26	980.63
chr2	86858910	86859296	387	*	6.43341	7.35888	3.12156	3.8693	4.62643e-20	1.03493e-17	162.45	165.85	9.61	7.8
chr17	35278400	35279202	803	*	7.94685	8.77573	5.78649	2.84999	4.64086e-20	1.03713e-17	427.89	448.68	62.8	47.59
chr22	38708419	38708760	342	*	7.93246	5.35835	8.80594	-3.2414	4.65669e-20	1.03965e-17	42.06	39.98	357.61	537.51
chr15	95387819	95388722	904	*	8.16243	8.98801	6.02802	2.82546	4.703e-20	1.04895e-17	439.5	576.03	65.76	64.75
chr17	2626824	2628371	1548	*	9.97976	10.7771	8.04821	2.62216	4.71384e-20	1.05034e-17	1768.14	1741.4	229.05	300.35
chr11	17949003	17949652	650	*	9.60893	7.36723	10.4477	-2.93044	4.72991e-20	1.05289e-17	142.15	188.06	1110.52	1682.75
chr10	60330036	60330679	644	*	8.00587	5.13897	8.90343	-3.50176	4.75084e-20	1.05651e-17	29.01	41.46	340.62	617.09
chr19	49575153	49576222	1070	*	8.64103	9.45165	6.61799	2.71528	4.84479e-20	1.07634e-17	657.07	743.35	86.45	110
chr9	36987997	36988294	298	*	7.3534	8.22111	4.8408	3.18815	4.866e-20	1.08e-17	281.39	315.41	21.43	35.89
chr19	1098834	1099062	229	*	7.4735	8.33032	5.06966	3.08654	4.87231e-20	1.08034e-17	303.15	340.58	26.6	40.57
chrY	15863146	15864281	1136	*	7.36598	8.24235	4.75992	3.26692	4.91262e-20	1.08822e-17	282.84	322.81	35.47	18.72
chr3	194494437	194494812	376	*	8.07959	5.52667	8.95111	-3.22129	4.98336e-20	1.10281e-17	52.22	39.98	393.08	596.8
chr1	113179713	113180357	645	*	8.67644	6.19836	9.54079	-3.15393	5.02395e-20	1.11071e-17	58.02	88.85	579.27	910.42
chr6	32634167	32634685	519	*	7.40954	8.25547	5.10617	2.98806	5.15557e-20	1.1387e-17	301.7	309.48	37.68	31.21
chr5	169368558	169369110	553	*	7.9203	5.3337	8.79492	-3.25265	5.25126e-20	1.1587e-17	37.71	42.94	353.92	534.39
chr8	143823778	143824011	234	*	7.22989	8.09906	4.70196	3.19622	5.32088e-20	1.17293e-17	259.64	288.75	31.77	20.28
chr8	144471948	144472688	741	*	7.16192	8.02617	4.68481	3.15074	5.3385e-20	1.17567e-17	277.04	244.33	28.82	22.62
chr2	48397411	48397804	394	*	7.74524	4.94029	8.63814	-3.44487	5.62412e-20	1.23736e-17	37.71	23.69	315.5	481.34
chr18	60067086	60067572	487	*	7.32962	8.18051	4.98146	3.0327	5.62953e-20	1.23736e-17	294.45	285.79	28.08	35.11
chr14	99740707	99741372	666	*	8.74266	9.54946	6.74656	2.68776	5.64487e-20	1.23953e-17	774.56	724.1	93.84	120.92
chr10	454161	454580	420	*	7.25954	4.01231	8.1815	-3.81816	5.65963e-20	1.24157e-17	14.5	17.77	233.48	347.16
chr22	28065285	28066122	838	*	9.18166	9.97164	7.29774	2.57259	5.71475e-20	1.25245e-17	983.43	1024.7	148.51	166.17
chr22	22711369	22712065	697	*	8.05901	8.87327	6.00974	2.74016	5.75429e-20	1.25936e-17	469.96	467.93	67.24	61.63
chr10	75691886	75692459	574	*	7.157	8.02884	4.60067	3.22434	5.75742e-20	1.25936e-17	301.7	220.64	25.12	23.4
chr5	100235936	100236970	1035	*	7.7766	8.61756	5.51653	2.94901	5.76678e-20	1.2602e-17	390.18	395.37	36.94	54.61
chr4	152881984	152882487	504	*	7.23768	8.10833	4.69404	3.21417	5.83114e-20	1.27303e-17	232.08	319.85	22.9	28.86
chr22	32043494	32043912	419	*	8.13333	5.61962	9.00115	-3.18599	5.89778e-20	1.28635e-17	42.06	56.27	410.07	614.74
chr6	26595056	26595418	363	*	8.10095	8.92612	5.96968	2.82196	5.93997e-20	1.2943e-17	424.99	547.89	60.59	64.75
chr17	29814555	29816196	1642	*	10.0549	10.8496	8.14052	2.60392	5.95893e-20	1.29719e-17	1830.51	1859.87	245.3	319.07
chr12	6383176	6383461	286	*	7.18825	8.05195	4.71675	3.1484	6.044e-20	1.31445e-17	252.38	278.39	22.17	30.43
chr12	54430659	54430947	289	*	6.91193	7.79092	4.27631	3.29661	6.1187e-20	1.32942e-17	204.52	238.41	18.47	20.28
chr1	65937117	65938091	975	*	8.16514	5.61472	9.03643	-3.21789	6.14309e-20	1.33344e-17	58.02	39.98	416.72	633.47
chr11	56918151	56918510	360	*	6.86807	7.76319	4.03394	3.47315	6.17705e-20	1.33953e-17	182.76	251.73	14.04	18.72
chr14	21323787	21324159	373	*	8.1219	8.93452	6.08453	2.72817	6.18625e-20	1.34024e-17	507.67	470.89	70.19	65.53
chr1	233656162	233656803	642	*	7.35859	8.20538	5.04742	2.99663	6.27183e-20	1.35749e-17	307.5	282.83	31.03	35.11
chr2	86564040	86565163	1124	*	9.26322	10.0666	7.29059	2.66351	6.30841e-20	1.3641e-17	1034.2	1110.59	134.47	178.65
chr16	23370542	23371101	560	*	7.23649	8.09994	4.76759	3.14235	6.36463e-20	1.37495e-17	243.68	305.04	30.29	24.18
chr2	27944226	27944522	297	*	7.09797	7.96171	4.62609	3.14689	6.66799e-20	1.43911e-17	233.53	265.06	23.64	25.74
chr17	32953037	32954021	985	*	8.03392	8.85446	5.93812	2.78567	6.73133e-20	1.4514e-17	484.46	441.27	67.24	55.39
chr20	45647486	45648263	778	*	8.35903	5.65507	9.24385	-3.35506	6.82306e-20	1.46978e-17	66.72	34.06	470.66	741.91
chr4	8899347	8899950	604	*	7.00297	7.88115	4.37662	3.28479	6.98419e-20	1.50307e-17	253.83	217.68	24.38	17.16
chr12	19108563	19109006	444	*	7.10876	7.96955	4.66628	3.11824	7.10989e-20	1.52867e-17	245.13	256.18	26.6	24.18
chr2	72150049	72150637	589	*	7.93878	5.22015	8.82481	-3.36783	7.12159e-20	1.52973e-17	46.42	28.13	356.13	550.77
chr15	93225939	93226534	596	*	8.30934	5.8555	9.17127	-3.12934	7.12887e-20	1.52985e-17	56.57	59.23	446.28	706.8
chr16	54536844	54537394	551	*	7.41259	8.25518	5.13848	2.95919	7.17524e-20	1.53834e-17	307.5	303.56	37.68	32.77
chr19	42555638	42556879	1242	*	8.8592	9.65113	6.9628	2.58455	7.22618e-20	1.5478e-17	781.81	826.28	128.56	120.92
chr11	6658889	6659598	710	*	9.12045	6.96092	9.94922	-2.84886	7.266e-20	1.55486e-17	123.29	125.87	804.63	1172.54
chr1	240160714	240161676	963	*	8.8838	9.67394	6.99891	2.57286	7.3081e-20	1.56154e-17	831.13	802.59	127.08	128.72
chr8	56013590	56014306	717	*	7.57009	8.43851	5.05003	3.18737	7.31098e-20	1.56154e-17	313.3	380.56	42.85	23.4
chr7	25961894	25962315	422	*	6.78797	7.68611	3.91324	3.50106	7.39533e-20	1.57807e-17	201.62	210.27	19.21	10.92
chrX	37003435	37004527	1093	*	6.97236	7.85587	4.28398	3.34556	7.40324e-20	1.57827e-17	220.47	242.85	14.78	24.18
chr1	209381865	209382332	468	*	6.80406	7.69224	4.05898	3.39121	7.54628e-20	1.60726e-17	188.56	225.08	17.73	15.6
chr5	51128793	51129204	412	*	6.26761	7.2241	2.1946	4.43873	7.69068e-20	1.63648e-17	146.5	152.52	3.69	5.46
chr11	35168335	35168654	320	*	6.9105	7.79003	4.26861	3.2983	7.77103e-20	1.65203e-17	217.57	225.08	22.17	16.38
chr6	408607	409142	536	*	7.21094	8.07193	4.7665	3.11852	7.79574e-20	1.65573e-17	252.38	285.79	31.03	23.4
chr1	179544483	179545445	963	*	7.64482	8.48829	5.36301	2.96518	7.86993e-20	1.66992e-17	352.47	365.75	48.77	33.55
chr5	154968417	154968845	429	*	6.40711	7.33815	2.98608	3.9492	8.0554e-20	1.70768e-17	174.06	149.56	9.61	6.24
chr20	61154648	61154985	338	*	6.71138	7.60557	3.88953	3.46002	8.06752e-20	1.70865e-17	208.87	180.66	14.04	15.6
chr14	88755293	88756024	732	*	6.98785	7.88374	4.14346	3.47381	8.15647e-20	1.72588e-17	213.22	259.14	23.64	11.7
chr7	71217075	71217613	539	*	7.58047	8.42424	5.296	2.96766	8.43786e-20	1.78375e-17	356.82	330.22	45.81	32.77
chr20	30575535	30576053	519	*	7.50816	8.34788	5.25861	2.93544	8.44586e-20	1.78378e-17	351.02	300.6	39.9	36.67
chr13	100620468	100621190	723	*	7.79714	8.62083	5.67732	2.80903	8.51245e-20	1.79617e-17	375.68	411.66	53.2	49.15
chr11	121712325	121712924	600	*	7.87465	5.3337	8.74505	-3.20891	8.5313e-20	1.79848e-17	37.71	42.94	349.48	508.65
chr13	44420645	44421075	431	*	7.22267	4.01096	8.14263	-3.78563	8.54073e-20	1.79879e-17	15.96	16.29	230.53	334.68
chr8	21418029	21418581	553	*	6.74953	7.65205	3.81363	3.55781	8.56296e-20	1.80148e-17	236.43	165.85	13.3	14.82
chr12	109882841	109883486	646	*	7.67289	4.79474	8.57128	-3.50534	8.56935e-20	1.80148e-17	36.26	19.25	305.15	455.6
chr1	223363290	223364083	794	*	8.03277	8.84667	5.98612	2.73677	8.63294e-20	1.81317e-17	439.5	481.26	62.8	63.97
chr11	62315379	62315776	398	*	8.05751	8.87768	5.96449	2.78386	8.65797e-20	1.81674e-17	474.31	466.45	54.68	70.21
chr4	11430222	11431210	989	*	7.98258	8.7997	5.9123	2.7597	8.74047e-20	1.83089e-17	433.7	457.56	64.28	56.17
chr6	26701355	26702040	686	*	7.10558	7.97503	4.57479	3.19773	8.74157e-20	1.83089e-17	224.83	278.39	26.6	21.06
chr1	197705749	197706337	589	*	8.1457	5.67953	9.00887	-3.13942	8.78357e-20	1.83799e-17	55.12	47.39	409.33	620.99
chr8	22439505	22439883	379	*	8.57937	9.37663	6.64811	2.62023	8.86769e-20	1.85389e-17	651.27	678.2	96.05	104.54
chr6	6218493	6219363	871	*	8.08278	8.90417	5.98047	2.79094	9.05571e-20	1.89145e-17	490.26	467.93	71.67	54.61
chr10	102397462	102398048	587	*	7.19308	8.05358	4.75342	3.11589	9.13936e-20	1.90717e-17	294.45	236.93	25.86	28.08
chr10	78722401	78723087	687	*	8.47093	6.07444	9.32698	-3.07465	9.17851e-20	1.91358e-17	69.62	65.15	495.78	788.71
chr21	32929893	32930077	185	*	6.51761	7.42811	3.46245	3.6577	9.19279e-20	1.91479e-17	169.71	174.73	10.34	11.7
chr10	106402142	106402843	702	*	8.41948	9.22089	6.46043	2.64824	9.34441e-20	1.94459e-17	571.49	621.93	87.19	88.94
chr6	83216090	83216694	605	*	7.93403	5.40796	8.80302	-3.19401	9.47068e-20	1.96906e-17	46.42	38.5	362.04	531.27
chr20	18204098	18204517	420	*	6.93847	7.82015	4.2717	3.32042	9.7347e-20	2.0221e-17	195.82	256.18	20.69	17.94
chr8	118400698	118401029	332	*	7.39324	8.23485	5.12753	2.95121	1.00673e-19	2.08927e-17	291.55	310.96	33.25	36.67
chr4	146236591	146237337	747	*	7.99372	5.35995	8.87254	-3.2921	1.00828e-19	2.09059e-17	37.71	44.42	354.66	582.76
chr11	32456018	32456953	936	*	8.21546	9.02822	6.17706	2.72753	1.01615e-19	2.10496e-17	483.01	561.22	76.84	67.87
chr1	2982797	2983050	254	*	7.3644	8.21334	5.03394	3.01396	1.0255e-19	2.12241e-17	293	300.6	28.08	37.45
chr5	35741130	35741909	780	*	9.3393	7.09052	10.1789	-2.93423	1.03675e-19	2.14373e-17	136.35	136.23	882.21	1436.22
chr3	50342036	50342433	398	*	7.72004	8.57732	5.31183	3.08767	1.04199e-19	2.15259e-17	432.24	331.7	30.29	49.15
chr15	48378395	48379447	1053	*	7.38292	8.23232	5.04832	3.01702	1.04463e-19	2.1561e-17	271.24	330.22	30.29	35.89
chr17	61527955	61528293	339	*	8.19274	9.00261	6.17504	2.70776	1.04656e-19	2.15811e-17	512.02	513.83	66.5	78.01
chr10	118296355	118296658	304	*	6.38296	7.3337	2.4863	4.29583	1.05452e-19	2.17254e-17	150.85	171.77	8.87	2.34
chr17	72653592	72654050	459	*	7.85949	8.70123	5.59273	2.9518	1.0605e-19	2.18289e-17	342.31	490.14	45.81	50.71
chr14	22568526	22568889	364	*	6.50212	7.42202	3.29145	3.77824	1.08163e-19	2.22436e-17	168.26	174.73	12.56	7.02
chr11	109566446	109567514	1069	*	7.22371	8.0862	4.76431	3.13042	1.08987e-19	2.23928e-17	279.94	263.58	32.51	21.84
chr19	15661993	15662695	703	*	8.23238	9.06962	6.00381	2.91622	1.11224e-19	2.28318e-17	516.37	558.26	48.77	79.57
chr7	18886325	18886890	566	*	7.58699	4.83655	8.4756	-3.39449	1.12818e-19	2.31379e-17	29.01	28.13	285.2	426.73
chr15	73695568	73695916	349	*	6.75552	7.64978	3.93287	3.46126	1.13145e-19	2.31643e-17	195.82	205.83	11.82	18.72
chr21	29326909	29327604	696	*	7.72154	4.97675	8.6097	-3.38926	1.1315e-19	2.31643e-17	33.36	29.62	300.72	480.56
chr6	33622801	33623415	615	*	8.3245	5.85474	9.18803	-3.14184	1.14032e-19	2.33237e-17	59.47	56.27	442.58	723.96
chr11	69631968	69632984	1017	*	8.32169	9.12521	6.34821	2.66192	1.16057e-19	2.37166e-17	551.18	565.66	85.71	77.23
chr11	112722746	112723358	613	*	7.248	8.10935	4.79991	3.1245	1.16739e-19	2.38345e-17	284.3	268.02	22.17	33.55
chr19	6551797	6552458	662	*	7.36263	8.23694	4.77946	3.24217	1.17467e-19	2.39614e-17	320.56	282.83	36.2	18.72
chr20	46473016	46473677	662	*	7.59849	8.45389	5.2082	3.06587	1.18263e-19	2.41021e-17	311.85	389.45	45.07	28.86
chr9	20906306	20906756	451	*	7.29676	4.01231	8.22076	-3.84217	1.18561e-19	2.41412e-17	14.5	17.77	226.09	370.56
chr15	91807176	91807904	729	*	7.64976	8.47884	5.48776	2.85055	1.19399e-19	2.42901e-17	364.07	349.47	41.38	48.37
chr13	73790564	73791059	496	*	8.048	5.41105	8.9271	-3.29418	1.20861e-19	2.45655e-17	37.71	47.39	364.26	609.28
chr14	101039005	101039500	496	*	7.48009	8.3225	5.20747	2.95813	1.22741e-19	2.49228e-17	327.81	312.45	31.77	42.13
chr2	171573112	171573800	689	*	8.34818	9.15657	6.34096	2.69692	1.2284e-19	2.49228e-17	581.64	559.74	72.41	89.72
chr7	98050311	98050626	316	*	7.57025	8.41085	5.31325	2.94097	1.22949e-19	2.49228e-17	377.13	303.56	42.85	36.67
chr17	40156981	40157925	945	*	7.72933	5.07184	8.61022	-3.3107	1.24049e-19	2.51233e-17	40.61	26.65	323.62	457.94
chr8	87530044	87530460	417	*	7.59018	4.4614	8.50526	-3.71633	1.24739e-19	2.52405e-17	17.41	26.65	257.86	468.86
chr18	45543890	45544500	611	*	8.13915	5.55013	9.01399	-3.25	1.25346e-19	2.53407e-17	50.77	42.94	385.69	648.29
chr10	124907377	124908526	1150	*	8.26361	9.0742	6.24073	2.71216	1.25801e-19	2.541e-17	494.62	583.43	71.67	79.57
chr22	18200452	18200911	460	*	7.49531	4.79945	8.37945	-3.34593	1.26675e-19	2.55638e-17	27.56	28.13	282.99	383.05
chr22	23197812	23198189	378	*	7.46675	8.30331	5.24384	2.90808	1.27774e-19	2.57628e-17	307.5	324.29	39.9	35.89
chr4	180979037	180980692	1656	*	9.26416	10.0681	7.28793	2.665	1.2875e-19	2.59365e-17	929.76	1217.21	144.82	167.73
chr1	154158649	154158905	257	*	7.34734	8.19166	5.05809	2.97126	1.3064e-19	2.62939e-17	291.55	293.2	36.2	30.43
chr15	36760853	36761382	530	*	8.58797	6.11745	9.45157	-3.1412	1.31675e-19	2.6473e-17	87.03	51.83	558.58	841.76
chr6	122597814	122598187	374	*	6.41741	7.33855	3.18481	3.79841	1.31763e-19	2.6473e-17	169.71	154	9.61	8.58
chr5	57750872	57751302	431	*	7.78495	5.07314	8.67041	-3.35906	1.32188e-19	2.65349e-17	37.71	29.62	314.02	500.85
chr9	75601427	75601826	400	*	7.54159	4.59637	8.44475	-3.56166	1.3582e-19	2.72397e-17	23.21	25.17	261.56	435.31
chr9	92515893	92516542	650	*	7.8911	8.71046	5.80413	2.7761	1.36762e-19	2.74045e-17	440.95	396.85	52.46	59.29
chr5	152963537	152964724	1188	*	8.5833	6.26563	9.43082	-2.9989	1.38992e-19	2.78266e-17	76.88	77	539.37	840.98
chr9	91737724	91738559	836	*	8.25289	5.82044	9.11266	-3.10724	1.39241e-19	2.7852e-17	47.87	65.15	444.06	663.11
chr4	100632099	100632488	390	*	7.18395	8.03543	4.83037	3.03275	1.41216e-19	2.82221e-17	258.19	266.54	28.82	28.08
chr9	113065237	113065843	607	*	8.4431	6.04305	9.29952	-3.07628	1.41612e-19	2.82765e-17	66.72	65.15	482.48	777.79
chr5	68625810	68626056	247	*	6.2492	7.20191	2.29449	4.34037	1.43004e-19	2.85291e-17	152.3	142.16	5.91	3.9
chr2	89064545	89065626	1082	*	7.92819	8.74679	5.84692	2.76901	1.44594e-19	2.88212e-17	410.49	448.68	62.06	53.05
chr2	186603332	186603987	656	*	9.01052	9.81265	7.04654	2.65266	1.45417e-19	2.89598e-17	877.54	921.05	113.05	151.35
chr10	100432861	100433482	622	*	8.56538	6.31957	9.40467	-2.93009	1.47305e-19	2.931e-17	79.78	79.96	550.46	805.1
chr2	119605328	119605710	383	*	7.03957	7.91578	4.43532	3.26338	1.49061e-19	2.96333e-17	201.62	281.35	21.43	21.84
chr10	105650018	105650401	384	*	6.76867	7.65983	3.98608	3.41817	1.49344e-19	2.96637e-17	203.07	201.39	19.21	12.48
chr5	9765509	9765906	398	*	8.10098	5.43341	8.98273	-3.31955	1.53293e-19	3.04214e-17	44.97	41.46	363.52	648.29
chr4	185939986	185941288	1303	*	7.79132	8.6415	5.44957	3.01907	1.5569e-19	3.08553e-17	398.88	399.81	55.41	31.99
chr6	36655701	36656850	1150	*	7.64753	5.01096	8.5266	-3.29207	1.55752e-19	3.08553e-17	31.91	32.58	301.46	436.09
chr2	30408071	30408525	455	*	7.20829	3.55339	8.14986	-4.126	1.56746e-19	3.10251e-17	10.15	13.33	207.62	360.42
chr10	7609859	7610220	362	*	7.57578	4.63548	8.4786	-3.55481	1.61198e-19	3.18786e-17	30.46	19.25	272.64	440.78
chr7	150634939	150636027	1089	*	8.01425	8.82578	5.98471	2.7175	1.66427e-19	3.2884e-17	435.15	472.37	65.02	61.63
chr15	85473033	85473662	630	*	9.28458	10.0757	7.39368	2.57733	1.68298e-19	3.32246e-17	1026.94	1131.32	152.21	184.11
chr9	2085608	2086112	505	*	7.88063	5.24967	8.75921	-3.28584	1.68732e-19	3.32815e-17	43.51	32.58	337.66	528.93
chr6	167555694	167555992	299	*	6.69798	7.59084	3.89354	3.44191	1.73507e-19	3.41936e-17	185.66	199.91	12.56	17.16
chr3	197798677	197799161	485	*	8.62224	9.48999	6.10927	3.18178	1.7814e-19	3.50761e-17	694.78	743.35	42.12	95.96
chr5	95795235	95795838	604	*	7.1956	4.07314	8.1103	-3.70635	1.79978e-19	3.54072e-17	18.86	14.81	231.27	321.41
chr1	116829016	116829676	661	*	8.82012	6.58461	9.65818	-2.91943	1.81005e-19	3.55785e-17	97.18	94.77	636.9	979.07
chr4	119386955	119387844	890	*	8.13983	5.4869	9.02032	-3.30729	1.83036e-19	3.59466e-17	30.46	59.23	415.98	622.55
chr17	31723869	31724339	471	*	6.6703	7.57023	3.77087	3.52023	1.83351e-19	3.59773e-17	163.9	216.19	14.04	13.26
chr15	41335409	41335997	589	*	7.76367	4.97606	8.65522	-3.42372	1.83566e-19	3.59883e-17	34.81	28.13	299.24	507.09
chr19	50831513	50831710	198	*	6.89083	7.78914	4.01381	3.4965	1.85172e-19	3.62718e-17	230.63	211.75	22.17	10.14
chr7	8482420	8482906	487	*	7.29184	8.14043	4.96449	3.00853	1.85691e-19	3.6342e-17	275.59	288.75	27.34	35.11
chr10	101681707	101682106	400	*	7.6601	8.49295	5.46778	2.87664	1.90628e-19	3.72761e-17	382.93	337.62	49.5	39.01
chr8	85095194	85095826	633	*	7.75991	8.61222	5.39853	3.03661	1.909e-19	3.72971e-17	387.28	395.37	53.94	30.43
chr5	148833731	148833981	251	*	6.68258	7.59569	3.58587	3.67941	1.91263e-19	3.73359e-17	194.37	192.5	16.99	7.02
chr12	118546002	118546385	384	*	7.20015	8.05482	4.81681	3.06135	1.91492e-19	3.73486e-17	272.69	259.14	24.38	31.99
chr6	89931717	89932408	692	*	7.80409	8.66005	5.40844	3.07369	1.93518e-19	3.77112e-17	400.33	408.7	29.55	55.39
chr2	102046595	102047057	463	*	8.05561	5.55059	8.92259	-3.17169	1.94882e-19	3.79445e-17	49.32	44.42	376.82	593.68
chr2	163335146	163335712	567	*	6.71479	7.61862	3.75992	3.56249	1.99624e-19	3.88344e-17	181.31	211.75	17.73	9.36
chr2	199191130	199191552	423	*	6.40871	7.37592	1.93287	4.69425	2.01175e-19	3.91026e-17	117.49	214.71	2.96	4.68
chr15	42491285	42491744	460	*	7.4759	4.2554	8.39636	-3.78736	2.04238e-19	3.9664e-17	14.5	23.69	240.13	433.75
chr11	134201442	134202564	1123	*	8.98765	9.77214	7.13829	2.53366	2.09366e-19	4.0625e-17	851.44	897.36	137.43	144.32
chr19	16573542	16574085	544	*	7.99821	8.8125	5.94872	2.73665	2.0989e-19	4.06919e-17	478.66	420.54	65.02	58.51
chr1	110679430	110680074	645	*	6.90351	7.79769	4.08185	3.4491	2.10496e-19	4.07746e-17	246.58	198.43	22.17	11.7
chr1	7086251	7086607	357	*	6.53444	7.45953	3.22963	3.84607	2.12566e-19	4.11404e-17	161	191.02	13.3	5.46
chr2	239575444	239576062	619	*	9.2241	7.06666	10.0526	-2.84316	2.18162e-19	4.21692e-17	137.8	130.31	842.31	1281.76
chr2	119966286	119966834	549	*	7.48807	8.35855	4.94626	3.20171	2.18254e-19	4.21692e-17	332.16	324.29	41.38	20.28
chr2	239843700	239845008	1309	*	8.7394	6.24651	9.6052	-3.15917	2.25622e-19	4.35558e-17	102.98	48.87	674.58	883.11
chr1	202545928	202546300	373	*	7.77528	5.07703	8.65962	-3.34552	2.29287e-19	4.42257e-17	29.01	38.5	311.06	497.72
chr8	67941443	67941977	535	*	8.87747	6.38938	9.7428	-3.15678	2.31048e-19	4.45274e-17	55.12	112.54	718.92	994.67
chr9	99808492	99808925	434	*	6.9868	7.8781	4.20255	3.41536	2.34176e-19	4.5073e-17	230.63	239.89	25.12	11.7
chr21	43074061	43074636	576	*	8.1685	5.66113	9.03571	-3.17361	2.34276e-19	4.5073e-17	46.42	54.79	398.25	651.41
chr3	123803098	123804352	1255	*	9.46866	7.16928	10.3141	-2.98004	2.35382e-19	4.52474e-17	113.14	174.73	1008.55	1537.64
chr3	153375816	153376386	571	*	8.13879	5.50332	9.01777	-3.28803	2.45681e-19	4.71872e-17	52.22	38.5	379.04	657.65
chr5	135213608	135214392	785	*	7.95599	8.769	5.91576	2.7274	2.46232e-19	4.7253e-17	410.49	462	59.11	61.63
chr18	72123570	72124706	1137	*	8.25237	9.05478	6.28657	2.65214	2.48388e-19	4.76265e-17	546.83	516.79	82.01	74.11
chr1	33182269	33182581	313	*	7.43996	8.27615	5.22023	2.90415	2.53048e-19	4.8479e-17	304.6	315.41	33.99	40.57
chr19	48989567	48989838	272	*	6.98497	7.85107	4.48908	3.16406	2.54069e-19	4.86336e-17	223.37	238.41	19.95	24.96
chr11	47516460	47517296	837	*	8.50006	6.01096	9.36549	-3.15618	2.5565e-19	4.88949e-17	63.82	65.15	474.35	844.88
chr16	1147737	1148141	405	*	7.26792	8.15267	4.56476	3.34438	2.57208e-19	4.91515e-17	258.19	310.96	32.51	14.82
chr4	57965014	57965465	452	*	7.61188	4.75977	8.50835	-3.47754	2.59013e-19	4.94548e-17	29.01	25.17	271.9	456.38
chr19	14695990	14696460	471	*	7.87854	8.71015	5.69634	2.86833	2.61125e-19	4.9816e-17	449.65	387.97	42.85	60.85
chr4	54367669	54368129	461	*	7.33034	4.25311	8.24223	-3.66772	2.65424e-19	5.05936e-17	17.41	20.73	233.48	372.12
chr5	75377862	75378203	342	*	6.51341	7.42087	3.50478	3.60882	2.65712e-19	5.0606e-17	181.31	161.41	12.56	10.14
chr2	239565601	239566717	1117	*	9.28014	7.09866	10.1117	-2.86598	2.67305e-19	5.08667e-17	133.44	140.67	860.04	1352.75
chr5	159009918	159010585	668	*	6.96546	7.84274	4.34927	3.26843	2.68094e-19	5.09741e-17	208.87	250.25	24.38	16.38
chr4	91048251	91049956	1706	*	9.8741	10.6646	7.98673	2.57251	2.71996e-19	5.16726e-17	1605.69	1640.71	219.44	287.87
chr4	62067843	62068652	810	*	6.68602	7.5812	3.85105	3.46332	2.76998e-19	5.25789e-17	166.81	216.19	14.04	14.82
chr12	107714951	107715203	253	*	7.77679	8.62033	5.49437	2.965	2.81185e-19	5.33289e-17	388.73	398.33	33.99	56.17
chr16	89987203	89987401	199	*	8.23016	9.03982	6.21386	2.70366	2.86413e-19	5.42751e-17	504.77	547.89	65.76	82.69
chr1	66961134	66961738	605	*	8.88907	6.59524	9.73391	-2.97321	3.01383e-19	5.70643e-17	100.08	93.29	642.07	1060.98
chr12	83044315	83044971	657	*	7.64209	8.46787	5.50609	2.82053	3.03086e-19	5.73389e-17	339.41	368.72	48.77	42.13
chr8	53281766	53282153	388	*	6.60702	7.50572	3.72454	3.50035	3.05467e-19	5.77412e-17	179.86	183.62	15.52	10.92
chr16	291816	292399	584	*	7.3813	8.22796	5.07135	2.98679	3.08284e-19	5.82251e-17	287.2	312.45	39.16	28.08
chr2	119884196	119884678	483	*	7.16427	8.03982	4.56728	3.24948	3.10185e-19	5.85355e-17	252.38	273.95	31.03	16.38
chr7	158936919	158938553	1635	*	8.16046	8.99661	5.94099	2.90047	3.12664e-19	5.89542e-17	503.32	518.27	76.84	46.03
chr9	100721085	100721679	595	*	8.63069	9.42494	6.71927	2.59693	3.1923e-19	6.01422e-17	681.73	693.01	96.05	114.68
chr2	96868148	96868609	462	*	7.85513	5.10707	8.74355	-3.38697	3.2185e-19	6.05856e-17	31.91	37.02	309.58	547.65
chr16	70607361	70607982	622	*	8.94207	6.70253	9.78061	-2.92149	3.25457e-19	6.12137e-17	94.28	114.02	686.41	1072.68
chr6	28702870	28703442	573	*	6.72603	7.63362	3.71551	3.60455	3.2656e-19	6.13402e-17	197.27	199.91	18.47	7.8
chr3	40665027	40665446	420	*	6.86355	7.73615	4.29903	3.2225	3.2667e-19	6.13402e-17	214.67	211.75	21.43	17.94
chr1	7599747	7600120	374	*	7.14454	8.00453	4.70994	3.10464	3.28382e-19	6.16106e-17	223.37	290.23	26.6	25.74
chr16	20940390	20940973	584	*	7.31585	4.35568	8.22005	-3.56684	3.29351e-19	6.17413e-17	24.66	16.29	245.3	351.06
chr10	69428233	69428604	372	*	6.89785	7.76569	4.38377	3.17807	3.31099e-19	6.20177e-17	217.57	217.68	20.69	21.06
chr14	94450427	94450770	344	*	7.03793	7.89596	4.62247	3.08646	3.39142e-19	6.34236e-17	233.53	242.85	25.86	23.4
chr20	56007983	56008429	447	*	7.31411	8.1781	4.83966	3.13856	3.39164e-19	6.34236e-17	269.79	309.48	36.2	21.06
chr7	108046747	108047384	638	*	7.35999	4.25082	8.27387	-3.69103	3.4229e-19	6.39555e-17	20.31	17.77	230.53	388.51
chr9	120173883	120174169	287	*	7.21993	8.07799	4.80407	3.08526	3.43918e-19	6.42067e-17	285.75	254.7	33.25	22.62
chr5	172719135	172719681	547	*	8.70184	6.33559	9.55468	-3.04168	3.45392e-19	6.44289e-17	65.27	96.25	586.66	917.44
chrX	25022571	25024064	1494	*	8.46397	9.26077	6.53578	2.61378	3.48271e-19	6.49126e-17	600.5	626.37	85.71	99.86
chr15	39874589	39874874	286	*	8.8312	6.52999	9.67687	-2.98001	3.48721e-19	6.49431e-17	84.13	100.69	622.86	1014.17
chr8	26890948	26891259	312	*	6.96015	7.83902	4.32586	3.28473	3.54564e-19	6.59772e-17	265.44	192.5	22.17	17.94
chr3	12045350	12046280	931	*	7.9466	8.76404	5.87393	2.7575	3.54933e-19	6.59916e-17	411.94	457.56	65.02	52.27
chr10	5895277	5895887	611	*	6.97138	7.86311	4.18154	3.42048	3.5569e-19	6.60782e-17	179.86	285.79	20.69	15.6
chr5	7755126	7755449	324	*	7.24804	8.09388	4.94539	2.98225	3.58234e-19	6.64963e-17	282.84	263.58	28.08	33.55
chr5	180017064	180018906	1843	*	8.96704	9.75995	7.06431	2.58703	3.61811e-19	6.71054e-17	776.01	958.07	138.17	129.5
chr8	109892930	109893375	446	*	6.88246	7.7513	4.35801	3.18726	3.6712e-19	6.80345e-17	211.77	219.16	19.95	21.06
chr4	134072973	134073457	485	*	7.52569	8.35223	5.38377	2.82651	3.68877e-19	6.83043e-17	327.81	325.77	41.38	42.13
chr22	41351564	41351849	286	*	7.12489	3.94597	8.04295	-3.74868	3.74135e-19	6.92214e-17	13.05	17.77	221.66	305.81
chr16	635444	635645	202	*	7.70214	8.52833	5.56294	2.82256	3.76334e-19	6.95714e-17	377.13	361.31	53.2	41.35
chr11	104322725	104323590	866	*	6.7531	7.66232	3.71777	3.62479	3.84092e-19	7.09478e-17	169.71	235.44	17.73	8.58
chr13	79169934	79170816	883	*	7.71143	8.5446	5.51647	2.87656	3.95401e-19	7.29774e-17	330.71	416.1	50.98	40.57
chrX	144899247	144900467	1221	*	6.79179	7.67666	4.08711	3.34495	3.97114e-19	7.32339e-17	188.56	220.64	19.95	14.04
chr6	75892727	75893342	616	*	8.61696	6.33153	9.46085	-2.96388	4.06572e-19	7.49172e-17	87.03	74.04	550.46	858.93
chr2	11936131	11936737	607	*	8.31215	5.70484	9.18864	-3.26193	4.07701e-19	7.50642e-17	39.16	65.15	433.71	733.32
chr2	161441420	161442057	638	*	7.66646	5.16593	8.53301	-3.16418	4.21054e-19	7.746e-17	36.26	35.54	312.54	428.29
chr1	163866580	163867097	518	*	8.68218	6.44697	9.52021	-2.91625	4.22041e-19	7.75786e-17	82.68	91.81	580.01	888.57
chr15	81156461	81156992	532	*	8.13934	5.50813	9.01794	-3.28269	4.31502e-19	7.92535e-17	37.71	53.31	376.82	659.99
chr1	47673454	47674229	776	*	7.74648	8.56322	5.67907	2.75258	4.35515e-19	7.9888e-17	362.62	393.89	50.98	51.49
chr3	193575625	193576225	601	*	7.8555	5.25311	8.73154	-3.25656	4.35661e-19	7.9888e-17	34.81	41.46	325.1	525.03
chr1	50886746	50887187	442	*	7.45113	8.2861	5.24148	2.89029	4.42202e-19	8.10219e-17	311.85	312.45	42.12	33.55
chr2	175200847	175202014	1168	*	9.00559	9.78786	7.1699	2.51776	4.45264e-19	8.1501e-17	855.79	912.16	137.43	150.57
chr1	236202974	236203889	916	*	8.77169	6.52999	9.61049	-2.92239	4.45535e-19	8.1501e-17	84.13	100.69	614	949.42
chr6	126251820	126252589	770	*	8.92231	6.66864	9.76252	-2.93322	4.48854e-19	8.20419e-17	113.14	90.33	673.85	1063.32
chr18	36925180	36925935	756	*	7.85469	5.10897	8.74293	-3.38361	4.53046e-19	8.27414e-17	27.56	41.46	316.23	540.63
chr19	24132409	24133056	648	*	7.79732	5.2219	8.67092	-3.23094	4.61654e-19	8.42059e-17	42.06	32.58	322.88	492.26
chr3	30514866	30515600	735	*	8.6218	6.34742	9.46441	-2.95353	4.61807e-19	8.42059e-17	72.52	90.33	557.84	855.03
chr4	55898958	55899787	830	*	6.47181	7.38625	3.35365	3.69518	4.63682e-19	8.448e-17	145.05	189.54	11.08	9.36
chr1	85485407	85486106	700	*	9.24919	7.18073	10.0661	-2.75332	4.64345e-19	8.45328e-17	145.05	145.12	877.03	1266.94
chr11	31832590	31833100	511	*	7.95176	8.76384	5.91822	2.71934	4.67026e-19	8.49526e-17	417.74	451.64	55.41	65.53
chr17	62970523	62970780	258	*	7.54542	8.39158	5.23998	2.98478	4.71919e-19	8.57728e-17	313.3	358.35	29.55	46.03
chr6	148365288	148365981	694	*	8.61431	6.39481	9.45046	-2.90012	4.72291e-19	8.57728e-17	95.73	72.56	577.79	821.48
chr22	25387634	25388242	609	*	8.19227	8.99571	6.21943	2.65831	4.72692e-19	8.5777e-17	533.78	487.18	69.45	79.57
chr5	140420486	140421074	589	*	6.64833	7.55316	3.67901	3.5693	4.73132e-19	8.57882e-17	165.36	210.27	16.26	9.36
chr7	112570636	112571386	751	*	8.05484	5.63899	8.91291	-3.08584	4.77877e-19	8.65793e-17	49.32	50.35	381.25	582.76
chr15	81184776	81185126	351	*	7.2817	4.19479	8.1942	-3.67048	4.81079e-19	8.70899e-17	18.86	17.77	225.35	360.42
chr14	57634872	57635356	485	*	6.73721	7.64554	3.71551	3.611	4.86109e-19	8.79304e-17	181.31	219.16	18.47	7.8
chr18	42993156	42993823	668	*	7.85374	5.24967	8.72994	-3.25631	4.86698e-19	8.79668e-17	43.51	32.58	328.06	521.13
chr1	236167244	236167739	496	*	7.7229	5.04504	8.60552	-3.32326	4.88119e-19	8.81532e-17	29.01	37.02	299.24	479.78
chr10	128555866	128556691	826	*	9.36176	7.23035	10.187	-2.81498	4.95625e-19	8.94376e-17	155.2	145.12	916.19	1415.16
chr20	33231686	33232230	545	*	8.49171	6.15374	9.34148	-3.0136	4.97712e-19	8.97429e-17	59.47	82.92	514.99	782.47
chr2	172583352	172584074	723	*	7.10933	3.71979	8.0388	-3.91106	4.98729e-19	8.97893e-17	14.5	11.85	206.88	319.07
chr8	134805456	134805877	422	*	7.45587	8.29376	5.22182	2.91577	4.98761e-19	8.97893e-17	294.45	333.18	32.51	42.13
chr2	18492641	18493246	606	*	8.7892	6.52904	9.63017	-2.9394	4.99173e-19	8.97922e-17	89.93	94.77	606.61	978.29
chr8	49951886	49952272	387	*	6.3852	7.30807	3.12156	3.81116	5.04998e-19	9.07679e-17	139.25	177.69	9.61	7.8
chr22	26860151	26860862	712	*	8.45292	5.9138	9.32314	-3.19968	5.08182e-19	9.12679e-17	40.61	79.96	514.99	766.09
chr10	7652482	7653190	709	*	9.48549	7.29508	10.3181	-2.87263	5.09149e-19	9.13692e-17	133.44	180.66	1008.55	1544.66
chr6	28687175	28687748	574	*	6.94232	7.82784	4.22978	3.35751	5.14131e-19	9.21905e-17	221.92	232.48	12.56	24.96
chr11	22213848	22215545	1698	*	9.40957	10.1923	7.5711	2.52035	5.1751e-19	9.2723e-17	1116.87	1223.13	174.37	205.96
chr3	111513553	111513901	349	*	7.41445	4.50524	8.31508	-3.52198	5.2071e-19	9.32226e-17	23.21	22.21	244.56	392.41
chr4	146229731	146230180	450	*	7.98806	5.36048	8.86634	-3.27818	5.26721e-19	9.42244e-17	36.26	45.9	342.83	590.56
chr8	49196589	49197011	423	*	8.53695	9.32604	6.6587	2.56134	5.28114e-19	9.43992e-17	646.92	636.74	97.53	104.54
chr2	127769797	127770213	417	*	7.7905	5.28085	8.65792	-3.17199	5.30589e-19	9.4767e-17	34.81	42.94	328.06	479.78
chr18	76739125	76740719	1595	*	8.06623	8.92271	5.66564	3.06895	5.34394e-19	9.53714e-17	464.16	506.43	67.98	33.55
chr8	114444693	114445270	578	*	6.66504	7.56241	3.80087	3.47972	5.38901e-19	9.61003e-17	191.46	186.58	17.73	10.14
chr3	10501694	10502351	658	*	8.33537	9.14653	6.30845	2.71253	5.47551e-19	9.75661e-17	535.23	598.24	67.24	91.28
chr3	66690230	66690717	488	*	7.46594	4.7971	8.3478	-3.31309	5.48342e-19	9.76303e-17	31.91	23.69	276.34	375.24
chr2	209171036	209171477	442	*	7.56718	4.40796	8.48409	-3.72789	5.54736e-19	9.86374e-17	23.21	19.25	237.91	478.22
chr1	181454938	181455253	316	*	7.12423	7.9732	4.79348	3.00645	5.55244e-19	9.86374e-17	255.29	247.29	26.6	28.86
chr3	154920330	154920894	565	*	8.20209	5.81812	9.05682	-3.05552	5.55326e-19	9.86374e-17	56.57	56.27	414.5	650.63
chr2	45679877	45680571	695	*	7.67771	4.9109	8.56762	-3.40043	5.55738e-19	9.86374e-17	26.11	34.06	283.72	475.1
chr4	62065793	62067152	1360	*	8.04215	8.84927	6.04381	2.68268	5.57599e-19	9.88903e-17	430.79	491.62	67.98	63.97
chr1	204653668	204655059	1392	*	9.06312	9.85564	7.16289	2.58371	5.63161e-19	9.97987e-17	825.33	1027.66	134.47	152.13
chr2	131553094	131553333	240	*	7.14949	8.03808	4.39937	3.39027	5.64864e-19	1.00022e-16	282.84	242.85	12.56	29.65
chr12	54348546	54349323	778	*	7.74514	8.56177	5.67848	2.75098	5.66285e-19	1.00196e-16	398.88	356.87	51.72	50.71
chr6	43252720	43253562	843	*	7.34607	8.18058	5.14017	2.88668	5.68718e-19	1.00548e-16	293	287.27	36.2	34.33
chr11	115515398	115515961	564	*	7.73822	5.01028	8.62501	-3.36548	5.71399e-19	1.00943e-16	33.36	31.1	291.11	498.5
chr13	29215660	29216144	485	*	7.92627	5.47957	8.78749	-3.11262	5.74114e-19	1.01344e-16	52.22	37.02	365.74	518.01
chr4	38281268	38281851	584	*	6.82436	7.69571	4.27324	3.20832	5.85668e-19	1.03303e-16	211.77	202.87	19.95	18.72
chrX	36975438	36976511	1074	*	7.16236	8.02892	4.66159	3.16124	5.87167e-19	1.03487e-16	300.25	222.12	29.55	21.06
chr22	31981366	31981832	467	*	8.27391	5.85209	9.13259	-3.08958	5.88478e-19	1.03637e-16	69.62	45.9	447.75	674.81
chr2	88629609	88630095	487	*	7.62341	8.45675	5.42711	2.87858	6.01016e-19	1.05764e-16	316.21	386.48	37.68	48.37
chr1	168172125	168173026	902	*	9.20374	6.98486	10.0398	-2.89889	6.107e-19	1.07384e-16	136.35	116.98	800.93	1304.38
chr14	103265957	103266448	492	*	8.79952	6.50452	9.64449	-2.97139	6.15164e-19	1.08085e-16	97.18	84.4	602.91	997.79
chr2	240609807	240610164	358	*	6.94019	7.80755	4.43119	3.16912	6.1948e-19	1.08759e-16	242.23	205.83	23.64	19.5
chr15	100879234	100879670	437	*	7.7193	8.54774	5.56237	2.84072	6.20945e-19	1.08932e-16	394.53	353.91	39.9	54.61
chr4	82964170	82964616	447	*	7.22349	8.06731	4.93861	2.96102	6.32989e-19	1.10959e-16	263.99	272.46	33.25	28.08
chr2	240745881	240746404	524	*	6.9598	7.8537	4.14178	3.43837	6.45994e-19	1.13152e-16	253.83	208.79	24.38	10.92
chr9	80113745	80114345	601	*	8.2556	5.62095	9.1345	-3.28377	6.49103e-19	1.13534e-16	37.71	60.71	407.12	716.94
chr1	217536424	217537171	748	*	7.4485	8.29063	5.17833	2.9496	6.4927e-19	1.13534e-16	288.65	337.62	30.29	42.13
chr2	172339337	172339829	493	*	6.9913	3.55153	7.92325	-3.9482	6.50258e-19	1.13534e-16	11.6	11.85	205.4	280.07
chr12	94954520	94955048	529	*	9.07229	9.84934	7.26826	2.48382	6.50389e-19	1.13534e-16	928.31	916.61	150.73	157.59
chr7	148036369	148037083	715	*	7.00551	7.86497	4.57604	3.09602	6.5068e-19	1.13534e-16	221.92	244.33	25.86	21.84
chr15	39876042	39876424	383	*	9.17517	6.928	10.0146	-2.92617	6.53606e-19	1.13957e-16	108.79	134.75	783.2	1285.66
chr15	92934933	92935205	273	*	6.91704	7.79701	4.27016	3.2921	6.54867e-19	1.14089e-16	185.66	259.14	21.43	17.16
chr2	73144293	73145585	1293	*	9.68484	10.4693	7.83559	2.53099	6.61167e-19	1.15098e-16	1434.53	1400.82	200.97	255.88
chr17	17477276	17477577	302	*	7.57234	4.83731	8.45971	-3.37119	6.64218e-19	1.15541e-16	27.56	29.62	271.16	432.97
chr2	49997978	49998559	582	*	7.24903	8.09986	4.90143	3.01952	6.66929e-19	1.15924e-16	245.13	303.56	33.25	26.52
chr12	94206369	94206801	433	*	7.72002	4.80102	8.62134	-3.52929	6.73145e-19	1.16914e-16	24.66	31.1	271.16	516.45
chr10	23483989	23484273	285	*	6.40123	7.31793	3.24541	3.72437	6.76164e-19	1.17349e-16	176.96	142.16	9.61	9.36
chr8	59476253	59476764	512	*	8.7634	6.50476	9.60419	-2.93652	6.7749e-19	1.17489e-16	95.73	85.89	596.26	960.34
chr9	91429416	91429946	531	*	9.08848	6.95126	9.91441	-2.81939	6.94341e-19	1.20319e-16	131.99	115.5	768.42	1161.62
chr22	23284794	23285420	627	*	7.70165	8.52633	5.57417	2.8089	6.97227e-19	1.20727e-16	355.37	382.04	53.94	41.35
chr9	124084535	124084943	409	*	7.82376	5.22658	8.69934	-3.24997	6.98864e-19	1.20918e-16	30.46	44.42	325.84	505.53
chr12	117485802	117486512	711	*	7.95328	8.75862	5.9673	2.66958	7.14661e-19	1.23557e-16	426.44	439.79	64.28	60.85
chr19	30348946	30349352	407	*	7.20834	8.05187	4.92603	2.95969	7.15354e-19	1.23583e-16	253.83	276.91	28.82	31.99
chr1	37503865	37504155	291	*	6.75065	7.64335	3.94819	3.42499	7.16622e-19	1.23708e-16	210.32	189.54	19.95	10.92
chr9	91261398	91262039	642	*	8.76567	6.3626	9.62241	-3.07298	7.23648e-19	1.24826e-16	60.92	103.65	619.17	957.22
chr2	106673639	106674019	381	*	6.82874	7.71171	4.14683	3.32058	7.25702e-19	1.25085e-16	203.07	216.19	22.17	13.26
chr7	37871807	37872199	393	*	6.78022	7.65519	4.18972	3.244	7.27523e-19	1.25303e-16	194.37	208.79	16.99	19.5
chr20	49609547	49609969	423	*	7.44986	8.27867	5.29	2.84198	7.29836e-19	1.25607e-16	323.46	297.64	37.68	40.57
chr2	89131241	89131678	438	*	6.89434	7.7673	4.32586	3.2216	7.37332e-19	1.268e-16	194.37	241.37	22.17	17.94
chr1	9411718	9412087	370	*	7.6136	8.43354	5.52231	2.77478	7.53191e-19	1.29371e-16	356.82	334.66	44.33	47.59
chr20	61475067	61475471	405	*	7.42636	8.2581	5.24305	2.86341	7.53421e-19	1.29371e-16	319.11	293.2	40.64	35.11
chr2	226358819	226359259	441	*	6.27929	7.21855	2.67901	4.06297	7.60193e-19	1.30435e-16	130.54	167.33	8.13	4.68
chr1	16871818	16872559	742	*	6.23687	7.20752	1.60312	4.76727	7.65346e-19	1.3122e-16	168.26	127.35	2.96	3.12
chr11	59624848	59625485	638	*	6.68537	7.58438	3.79874	3.4956	7.89283e-19	1.35222e-16	197.27	186.58	18.47	9.36
chr18	66346744	66347191	448	*	7.80418	5.25197	8.67564	-3.20802	7.90032e-19	1.35248e-16	37.71	38.5	316.97	500.85
chr9	120247424	120247867	444	*	6.92802	7.79593	4.41327	3.17551	7.95973e-19	1.36162e-16	201.62	242.85	19.21	23.4
chrX	1882220	1882601	382	*	6.28175	7.23239	2.3879	4.26992	7.96869e-19	1.36213e-16	134.9	165.85	8.13	2.34
chr18	29092477	29092830	354	*	6.93625	7.80004	4.4638	3.13696	8.02527e-19	1.37077e-16	211.77	233.96	19.95	24.18
chr15	81193047	81193466	420	*	8.2372	5.97606	9.07828	-2.93792	8.06903e-19	1.37721e-16	69.62	56.27	449.97	631.13
chr13	25321429	25322249	821	*	7.91007	8.73446	5.78487	2.80582	8.37448e-19	1.42826e-16	406.14	445.72	65.02	45.25
chr7	155205220	155205841	622	*	7.5643	8.41118	5.25238	2.9844	8.41929e-19	1.43483e-16	298.8	382.04	45.81	30.43
chr13	37247860	37248721	862	*	8.04856	8.86062	6.01523	2.71567	8.62904e-19	1.46947e-16	436.6	493.1	72.41	56.95
chr14	37289583	37289931	349	*	6.39361	7.30669	3.29752	3.67172	8.65207e-19	1.47229e-16	153.75	162.89	11.08	8.58
chr20	61317257	61317903	647	*	7.15303	8.00596	4.78595	3.03622	8.78114e-19	1.49313e-16	269.79	244.33	31.77	23.4
chr12	14133445	14134055	611	*	6.71824	7.60233	4.02299	3.33253	8.97641e-19	1.52519e-16	179.86	208.79	18.47	14.04
chr6	4487846	4488187	342	*	6.42035	7.33139	3.35656	3.64727	8.98427e-19	1.52538e-16	175.51	146.6	10.34	10.14
chr15	39758075	39759102	1028	*	10.0973	8.07912	10.9072	-2.70134	9.01449e-19	1.52937e-16	265.44	275.43	1530.93	2309.97
chr7	36789232	36789577	346	*	6.29837	7.23137	2.83654	3.95561	9.15101e-19	1.55107e-16	145.05	155.48	9.61	4.68
chr4	44664280	44664959	680	*	6.99976	7.88981	4.23121	3.39373	9.15605e-19	1.55107e-16	259.64	214.71	25.86	11.7
chr17	77472161	77472481	321	*	6.34763	7.28673	2.75111	4.05376	9.19206e-19	1.556e-16	149.4	162.89	10.34	3.12
chr1	18508990	18509658	669	*	7.11541	7.97311	4.7031	3.07742	9.26839e-19	1.56775e-16	256.74	245.81	31.03	21.06
chr2	168718886	168719666	781	*	6.69063	7.57983	3.93287	3.39239	9.31317e-19	1.57415e-16	184.21	198.43	11.82	18.72
chr19	44462022	44462527	506	*	6.98805	3.24622	7.9331	-4.16654	9.34841e-19	1.57893e-16	13.05	5.92	201.71	287.09
chr6	40260832	40261852	1021	*	7.45354	8.31554	4.99908	3.11537	9.38424e-19	1.58381e-16	333.61	303.56	42.12	21.84
chr1	50646765	50647333	569	*	6.82174	7.70682	4.1147	3.34056	9.68996e-19	1.63419e-16	200.17	217.68	22.17	12.48
chr1	181287242	181288467	1226	*	8.52482	9.32849	6.55035	2.65648	9.74097e-19	1.64157e-16	613.56	672.28	107.87	79.57
chr20	38802363	38802907	545	*	6.3055	7.23137	2.98608	3.84741	9.79017e-19	1.64864e-16	145.05	155.48	9.61	6.24
chr17	4386632	4387262	631	*	7.29219	8.14051	4.96735	3.00012	9.91172e-19	1.66787e-16	274.14	290.23	25.12	37.45
chr13	95132777	95133432	656	*	8.08915	8.90971	5.99315	2.77938	1.00328e-18	1.68699e-16	455.45	506.43	51.72	75.67
chr3	71833990	71834864	875	*	9.12506	9.91688	7.22934	2.57788	1.00837e-18	1.69429e-16	1019.69	913.64	130.04	170.07
chr16	27878736	27879316	581	*	8.69769	9.49108	6.7919	2.58825	1.01888e-18	1.71068e-16	713.64	725.58	96.79	124.82
chr3	42872791	42873207	417	*	7.19586	8.04379	4.87448	2.9962	1.02474e-18	1.71926e-16	253.83	273.95	25.12	33.55
chr5	151185312	151185878	567	*	7.6373	4.76058	8.53559	-3.48993	1.03273e-18	1.73137e-16	27.56	26.65	260.82	481.34
chr5	1930618	1932096	1479	*	9.42354	10.2065	7.58366	2.52018	1.03656e-18	1.73651e-16	1142.98	1220.17	170.68	212.98
chr1	176435656	176435980	325	*	6.58938	7.48349	3.76868	3.44106	1.03804e-18	1.73771e-16	162.45	195.46	14.78	12.48
chr3	57738144	57738395	252	*	7.32975	8.16206	5.14186	2.86752	1.06374e-18	1.77942e-16	293	279.87	34.73	35.89
chr7	36644069	36645243	1175	*	7.84061	8.703	5.38227	3.11861	1.06671e-18	1.78306e-16	435.15	398.33	56.89	26.52
chr1	162225945	162226912	968	*	7.91414	5.48251	8.77383	-3.09681	1.07038e-18	1.78788e-16	43.51	45.9	347.27	528.15
chr19	35714665	35715386	722	*	9.1255	6.86638	9.96635	-2.93571	1.07588e-18	1.7957e-16	100.08	133.27	758.82	1241.97
chr15	39636824	39637938	1115	*	9.07824	6.7922	9.9222	-2.9613	1.07664e-18	1.7957e-16	92.83	128.83	735.17	1205.31
chr1	19258940	19259335	396	*	7.84422	8.65611	5.81204	2.71494	1.08248e-18	1.80411e-16	435.15	371.68	55.41	56.95
chr19	41368355	41369083	729	*	9.09396	6.80181	9.93862	-2.96705	1.0904e-18	1.81598e-16	92.83	130.31	742.56	1220.13
chr5	131586901	131587478	578	*	7.08585	7.9355	4.749	3.00782	1.10008e-18	1.83075e-16	237.88	251.73	28.82	24.96
chr16	21201983	21202320	338	*	7.22264	4.07314	8.13896	-3.71413	1.1129e-18	1.85073e-16	18.86	14.81	214.27	349.5
chr3	46136035	46136336	302	*	7.08853	3.63987	8.0209	-3.95006	1.11714e-18	1.85643e-16	11.6	13.33	197.28	322.19
chrX	74143894	74145451	1558	*	9.0712	9.84572	7.28222	2.46679	1.12344e-18	1.86553e-16	937.01	903.28	152.95	158.37
chr12	103343997	103344617	621	*	7.24507	8.12005	4.65451	3.23692	1.13329e-18	1.88051e-16	300.25	256.18	33.99	16.38
chr1	9536843	9537341	499	*	8.51349	9.33474	6.41226	2.78406	1.13504e-18	1.88126e-16	629.51	661.91	65.02	105.32
chr8	128403261	128404093	833	*	9.93461	7.75292	10.7662	-2.86119	1.1354e-18	1.88126e-16	188.56	242.85	1316.66	2166.43
chr14	78471692	78472002	311	*	6.71401	7.59682	4.03394	3.32196	1.15542e-18	1.91303e-16	179.86	207.31	14.04	18.72
chr21	42818500	42818932	433	*	7.39545	4.75896	8.27452	-3.28045	1.15673e-18	1.9138e-16	30.46	23.69	267.47	351.84
chr12	113909190	113909877	688	*	7.68198	8.49706	5.62669	2.73798	1.1588e-18	1.91583e-16	355.37	367.23	46.55	52.27
chr13	24606354	24606791	438	*	7.87927	5.38363	8.74534	-3.15455	1.17496e-18	1.94114e-16	43.51	39.98	332.49	525.81
chr14	76032626	76033071	446	*	7.2977	8.13214	5.09236	2.88329	1.1835e-18	1.95382e-16	288.65	272.46	35.47	32.77
chr11	79337185	79337883	699	*	6.8132	7.68654	4.24069	3.22235	1.18607e-18	1.95663e-16	195.82	216.19	21.43	16.38
chr7	38356309	38356714	406	*	8.2098	5.89119	9.05743	-2.9911	1.19108e-18	1.96348e-16	59.47	59.23	420.41	645.17
chr16	68790111	68790606	496	*	6.58913	7.48652	3.72454	3.47644	1.19638e-18	1.97078e-16	197.27	161.41	15.52	10.92
chr1	147243383	147244238	856	*	7.50469	8.32862	5.38305	2.80253	1.20541e-18	1.98422e-16	339.41	303.56	42.12	41.35
chr6	32551636	32552662	1027	*	7.49507	8.31978	5.36734	2.80767	1.22017e-18	2.00704e-16	314.76	324.29	44.33	38.23
chr22	30022380	30022856	477	*	8.61741	6.49513	9.44142	-2.80325	1.23355e-18	2.02758e-16	82.68	97.73	580.75	809.78
chr3	45712398	45712929	532	*	7.77253	4.90507	8.67014	-3.47958	1.25023e-18	2.05352e-16	37.71	22.21	288.9	525.81
chr11	76756967	76757424	458	*	8.44325	9.25168	6.4357	2.69079	1.25502e-18	2.05989e-16	615.01	604.16	70.93	102.2
chr17	30115986	30116446	461	*	8.50906	6.15005	9.36112	-3.02842	1.26006e-18	2.06667e-16	76.88	65.15	489.87	825.38
chr14	75516316	75516849	534	*	7.65719	4.94526	8.54267	-3.34759	1.26354e-18	2.07089e-16	27.56	34.06	279.29	466.52
chr7	20823271	20825379	2109	*	9.36774	10.1431	7.57359	2.47203	1.28501e-18	2.10456e-16	1112.52	1149.09	176.59	204.39
chr2	239047070	239047767	698	*	8.09354	8.91984	5.95349	2.81906	1.28989e-18	2.11102e-16	414.84	553.81	71.67	52.27
chr11	27792165	27792717	553	*	6.72996	7.64063	3.67202	3.63293	1.31322e-18	2.14765e-16	175.51	223.6	18.47	7.02
chr11	62381873	62382112	240	*	7.61139	8.44641	5.40135	2.88584	1.32313e-18	2.1623e-16	343.77	353.91	50.98	33.55
chr6	74588606	74589828	1223	*	8.46831	6.09149	9.32228	-3.04528	1.32782e-18	2.1684e-16	63.82	72.56	472.87	807.44
chr2	85610287	85610742	456	*	7.48316	4.79788	8.36641	-3.32277	1.34057e-18	2.18764e-16	30.46	25.17	264.51	395.53
chr2	105459027	105460120	1094	*	7.69748	8.5429	5.39853	2.96985	1.34567e-18	2.19334e-16	372.77	373.16	53.94	30.43
chr2	7153932	7154228	297	*	6.49749	7.40424	3.49952	3.58593	1.34599e-18	2.19334e-16	156.65	182.14	14.04	8.58
chr16	50276959	50277284	326	*	7.20154	3.79395	8.13191	-3.91363	1.37671e-18	2.24179e-16	18.86	8.88	207.62	353.4
chr1	209994208	209994613	406	*	7.0342	7.89458	4.59575	3.09998	1.39247e-18	2.26582e-16	255.29	220.64	28.08	20.28
chr1	27336231	27336542	312	*	7.70739	8.52455	5.63684	2.75234	1.39379e-18	2.26634e-16	398.88	337.62	48.03	51.49
chr4	37394137	37394522	386	*	6.43884	7.36154	3.17825	3.79786	1.40013e-18	2.27502e-16	133.44	195.46	11.08	7.02
chr17	45798120	45798924	805	*	9.28716	10.0698	7.44897	2.5177	1.42486e-18	2.31354e-16	1087.86	1061.72	154.42	195.03
chr4	190938507	190938851	345	*	6.94726	7.82813	4.28993	3.29433	1.44696e-18	2.34774e-16	217.57	236.93	25.86	13.26
chr6	15769963	15770385	423	*	7.75244	8.57247	5.66046	2.77344	1.46013e-18	2.36742e-16	342.31	419.06	46.55	54.61
chr15	31775322	31776229	908	*	8.56828	9.35466	6.70712	2.54109	1.48353e-18	2.40364e-16	620.81	688.57	99.75	109.22
chr17	72848344	72849196	853	*	8.55426	9.36607	6.52266	2.71415	1.4978e-18	2.42503e-16	619.36	700.41	73.89	110
chr5	169307106	169307497	392	*	7.1106	3.4614	8.05193	-4.09789	1.50235e-18	2.43067e-16	8.7	13.33	190.63	340.14
chr17	32138234	32138887	654	*	6.74606	7.64967	3.79445	3.54432	1.515e-18	2.44938e-16	197.27	204.35	19.95	7.8
chr6	100900841	100901292	452	*	9.03656	7.03593	9.844	-2.68227	1.5244e-18	2.46284e-16	124.74	137.71	780.24	1057.86
chr8	87455826	87456282	457	*	7.54649	4.90871	8.42566	-3.28068	1.52774e-18	2.46647e-16	30.46	29.62	271.9	415.81
chr2	103280912	103281281	370	*	6.35831	7.28729	2.97854	3.88679	1.53194e-18	2.4715e-16	143.6	168.81	11.08	4.68
chr19	21769077	21770206	1130	*	8.19952	8.99725	6.26517	2.61507	1.53412e-18	2.47325e-16	481.56	540.49	81.28	72.55
chr5	95367466	95368073	608	*	9.114	6.96039	9.94202	-2.83259	1.54488e-18	2.48882e-16	127.64	121.42	757.34	1209.99
chr11	26814433	26815106	674	*	7.55704	4.90944	8.43707	-3.28956	1.55186e-18	2.4983e-16	29.01	31.1	271.9	421.27
chr2	240821013	240821985	973	*	7.76313	8.58966	5.62126	2.82053	1.55324e-18	2.49874e-16	330.71	439.79	53.2	45.25
chr5	42020876	42021642	767	*	7.11523	7.97503	4.68249	3.09378	1.57521e-18	2.53229e-16	224.83	278.39	30.29	21.06
chr11	94817733	94817993	261	*	6.89227	7.76409	4.33621	3.2104	1.57948e-18	2.53736e-16	240.78	193.98	16.99	23.4
chr17	72508705	72509143	439	*	8.39065	9.17904	6.51682	2.554	1.58654e-18	2.54612e-16	574.39	584.91	87.19	95.96
chr7	73183328	73185175	1848	*	9.15671	9.92898	7.38093	2.45214	1.58749e-18	2.54612e-16	948.62	1001.01	163.29	170.07
chr18	76746012	76746496	485	*	6.88723	7.77029	4.20417	3.31634	1.5883e-18	2.54612e-16	221.92	214.71	24.38	12.48
chr10	62177744	62178153	410	*	7.24252	8.09133	4.91334	3.00201	1.62905e-18	2.60959e-16	258.19	287.27	24.38	35.89
chr8	27498651	27499111	461	*	7.40638	4.36314	8.31611	-3.62739	1.63325e-18	2.61447e-16	14.5	26.65	236.44	400.99
chr13	79177046	79177975	930	*	8.44758	9.2645	6.37884	2.75082	1.64012e-18	2.62363e-16	590.35	639.7	65.02	101.42
chr11	44863713	44864209	497	*	8.57561	6.38572	9.40816	-2.86776	1.64965e-18	2.63701e-16	75.43	91.81	547.5	811.34
chr3	49937872	49938646	775	*	8.85891	9.64229	7.01638	2.52098	1.66756e-18	2.66377e-16	826.78	771.49	141.12	117.8
chr11	11534480	11535378	899	*	8.18005	5.71979	9.04263	-3.1204	1.66987e-18	2.66558e-16	58.02	47.39	391.6	663.11
chr6	26575770	26576144	375	*	7.03524	7.91451	4.39641	3.27718	1.68471e-18	2.68737e-16	221.92	260.62	28.08	14.04
chr10	126254319	126254711	393	*	6.69905	7.57812	4.06255	3.27988	1.68803e-18	2.69078e-16	205.97	176.21	16.26	17.16
chr2	166076024	166076411	388	*	6.29059	7.21884	2.92505	3.88221	1.70616e-18	2.71776e-16	127.64	170.29	7.39	7.8
chr8	75317955	75318825	871	*	8.44353	5.99601	9.30483	-3.10949	1.70829e-18	2.71925e-16	56.57	71.08	455.14	809.78
chr2	74803204	74804318	1115	*	9.91394	7.81047	10.7355	-2.78367	1.71358e-18	2.72575e-16	198.72	250.25	1329.22	2080.61
chr17	60664855	60665303	449	*	7.22029	4.134	8.13275	-3.65922	1.71673e-18	2.72886e-16	20.31	14.81	215.75	345.6
chr22	43739205	43739920	716	*	9.2922	10.0797	7.42418	2.54795	1.71966e-18	2.73157e-16	1022.59	1141.69	149.25	194.25
chr16	78850468	78851251	784	*	8.83827	6.63921	9.67194	-2.87616	1.72085e-18	2.73157e-16	97.18	102.17	625.08	1006.37
chr6	27302596	27302921	326	*	6.37553	7.28729	3.30054	3.6503	1.74021e-18	2.76038e-16	143.6	168.81	10.34	9.36
chr16	64985925	64986522	598	*	7.37297	4.63723	8.2604	-3.36506	1.75413e-18	2.78051e-16	27.56	22.21	249.74	363.54
chr8	97746363	97746719	357	*	7.28751	3.94455	8.2146	-3.86418	1.76444e-18	2.7949e-16	14.5	16.29	201.71	392.41
chr5	37957232	37957746	515	*	7.05153	3.25311	7.99873	-4.20289	1.76685e-18	2.79676e-16	8.7	10.37	185.46	326.1
chr2	9476950	9477522	573	*	8.08272	5.51005	8.95607	-3.22341	1.79175e-18	2.8342e-16	31.91	59.23	387.9	605.38
chr15	40144374	40144921	548	*	8.65078	6.52999	9.4746	-2.80049	1.79978e-18	2.84491e-16	84.13	100.69	588.14	834.74
chr7	51255719	51256121	403	*	6.73285	7.60681	4.15353	3.22695	1.81509e-18	2.86712e-16	192.91	196.94	19.21	16.38
chr8	135528295	135528924	630	*	7.71577	5.00824	8.60088	-3.34007	1.81681e-18	2.86784e-16	37.71	26.65	288.16	488.36
chr4	4386608	4387001	394	*	7.006	7.89431	4.25932	3.37049	1.82477e-18	2.8784e-16	259.64	216.19	26.6	11.7
chr3	144493690	144494142	453	*	7.83264	5.22424	8.70922	-3.25387	1.83064e-18	2.88565e-16	36.26	38.5	307.37	529.71
chr11	96688332	96688897	566	*	7.18736	8.03999	4.82303	3.02971	1.85243e-18	2.91798e-16	249.48	276.91	33.99	22.62
chr10	24404288	24404885	598	*	6.58017	7.49574	3.44342	3.69396	1.86919e-18	2.94234e-16	158.1	202.87	15.52	6.24
chr18	20805399	20806071	673	*	8.871	6.56079	9.71768	-2.98096	1.88858e-18	2.97079e-16	105.89	82.92	619.91	1064.1
chr5	133094361	133094704	344	*	6.71437	7.60256	3.96925	3.37712	1.90697e-18	2.99764e-16	176.96	211.75	11.82	19.5
chr2	18665156	18665554	399	*	7.71896	5.19479	8.58777	-3.17796	1.91094e-18	3.0018e-16	37.71	35.54	302.2	467.3
chr2	199382641	199383165	525	*	7.24754	8.11046	4.78389	3.12675	1.9292e-18	3.02839e-16	263.99	288.75	19.21	35.89
chr20	33825286	33825697	412	*	8.40606	6.05719	9.25702	-3.01687	1.93537e-18	3.03597e-16	75.43	57.75	466.96	756.73
chr8	91688283	91688827	545	*	8.14965	5.85436	8.99466	-2.96687	1.94177e-18	3.04391e-16	60.92	54.79	408.59	611.62
chr12	58255405	58255632	228	*	6.83538	7.70222	4.33178	3.16021	1.95134e-18	3.05531e-16	192.91	223.6	19.21	21.06
chr7	97361985	97363416	1432	*	8.0531	8.86959	5.98748	2.74463	1.95173e-18	3.05531e-16	442.4	493.1	74.63	52.27
chr2	61153799	61154731	933	*	7.66686	5.10389	8.53932	-3.2121	1.95767e-18	3.06248e-16	39.16	29.62	296.29	447.8
chr15	55542580	55543365	786	*	8.80609	6.56402	9.64493	-2.91693	1.98448e-18	3.10229e-16	85.58	103.65	608.09	993.11
chr6	28739276	28739846	571	*	6.66298	7.56333	3.75772	3.50433	1.99519e-18	3.11689e-16	179.86	198.43	18.47	8.58
chr12	53691929	53692334	406	*	7.75404	5.22307	8.6235	-3.18376	1.99658e-18	3.11691e-16	39.16	35.54	305.89	482.9
chr4	6051690	6052146	457	*	7.16988	8.04404	4.58835	3.22541	2.03296e-18	3.17152e-16	249.48	278.39	32.51	15.6
chr3	71358532	71358857	326	*	7.08127	3.45344	8.0217	-4.07483	2.05902e-18	3.20996e-16	14.5	7.4	192.11	327.66
chr22	23219646	23219962	317	*	6.46808	7.36551	3.60312	3.476	2.08679e-18	3.25102e-16	161	168.81	11.82	12.48
chr8	11565789	11566840	1052	*	8.16237	9.01062	5.8381	2.99217	2.09244e-18	3.25759e-16	451.1	580.47	74.63	39.79
chr10	69548200	69548671	472	*	6.73705	7.62315	4.01749	3.34672	2.12296e-18	3.30284e-16	192.91	201.39	20.69	11.7
chr3	152928448	152928858	411	*	7.4614	4.59456	8.35896	-3.4762	2.13749e-18	3.32316e-16	26.11	22.21	241.61	415.03
chrX	92927986	92929003	1018	*	8.28892	9.10723	6.20989	2.75992	2.20921e-18	3.4323e-16	504.77	598.24	59.11	88.94
chr2	178162876	178163394	519	*	7.68892	4.94171	8.57728	-3.37345	2.23065e-18	3.46325e-16	34.81	26.65	276.34	487.58
chr8	124923747	124924458	712	*	9.74977	7.68177	10.5666	-2.74786	2.24892e-18	3.48922e-16	190.01	220.64	1188.1	1845.01
chr6	39567600	39568215	616	*	8.03714	5.57642	8.89977	-3.12057	2.25966e-18	3.50349e-16	39.16	56.27	370.17	585.1
chr9	91353590	91354055	466	*	7.74459	5.16288	8.61876	-3.22764	2.28662e-18	3.54287e-16	43.51	28.13	310.32	475.88
chr1	175098334	175098722	389	*	7.59086	5.10643	8.45583	-3.14131	2.33693e-18	3.61834e-16	33.36	35.54	291.11	411.13
chr2	103235282	103236532	1251	*	8.91868	9.70692	7.04586	2.55214	2.35073e-18	3.63723e-16	794.87	876.62	115.26	149.01
chr22	25206332	25206632	301	*	6.34486	7.25853	3.23912	3.67078	2.35836e-18	3.64626e-16	155.2	151.04	11.08	7.8
chr3	185705429	185706017	589	*	7.14971	3.72145	8.0811	-3.92654	2.35978e-18	3.64626e-16	13.05	13.33	192.11	349.5
chr2	113642534	113642808	275	*	6.65598	7.54524	3.89754	3.38771	2.36715e-18	3.65516e-16	192.91	180.66	11.08	18.72
chr3	52925703	52926273	571	*	8.49433	6.10928	9.34918	-3.05082	2.37972e-18	3.67207e-16	53.67	84.4	502.43	801.98
chr17	40333089	40333626	538	*	8.86915	9.65701	6.9987	2.54959	2.38666e-18	3.68027e-16	751.35	863.3	113.79	141.98
chr5	67780095	67781060	966	*	8.86014	6.65875	9.6941	-2.87683	2.3938e-18	3.68877e-16	108.79	93.29	633.95	1022.75
chr8	23698502	23699265	764	*	7.08197	3.87792	8.00149	-3.75434	2.39999e-18	3.6958e-16	10.15	19.25	209.84	302.69
chr22	36958259	36958864	606	*	7.96803	8.76885	6.01297	2.63533	2.43456e-18	3.74649e-16	414.84	457.56	62.06	67.09
chr6	94126326	94126850	525	*	7.05974	7.93666	4.44752	3.25172	2.4456e-18	3.76093e-16	219.02	270.98	28.82	14.82
chr9	139869320	139869918	599	*	7.62685	8.45083	5.50478	2.79957	2.45827e-18	3.77786e-16	382.93	316.89	50.24	40.57
chr19	16490304	16490760	457	*	6.88107	7.7662	4.17331	3.33484	2.4761e-18	3.80269e-16	210.32	225.08	24.38	11.7
chr14	105950963	105951240	278	*	7.68019	8.52556	5.3817	2.9718	2.48911e-18	3.82008e-16	374.23	362.79	29.55	53.83
chr14	99739412	99739975	564	*	7.34399	8.17682	5.15186	2.86685	2.49272e-18	3.82303e-16	294.45	284.31	39.9	31.21
chr5	175625903	175626819	917	*	7.93701	8.74689	5.91916	2.69678	2.532e-18	3.88065e-16	407.59	451.64	67.98	53.05
chr10	64252250	64252793	544	*	8.00288	5.3337	8.88476	-3.30576	2.53932e-18	3.88924e-16	37.71	42.94	323.62	621.77
chr5	139569869	139570480	612	*	7.95891	8.77901	5.86639	2.77273	2.54411e-18	3.89395e-16	403.23	475.33	48.03	68.65
chr1	225697520	225697850	331	*	6.45743	7.37171	3.34195	3.67469	2.55014e-18	3.90055e-16	163.9	167.33	14.04	6.24
chr2	70994443	70995707	1265	*	8.71424	9.51809	6.73855	2.6565	2.55676e-18	3.90803e-16	687.53	778.89	87.19	126.38
chrX	64626377	64626956	580	*	7.33607	8.17418	5.10019	2.91154	2.56726e-18	3.92144e-16	274.14	303.56	28.82	39.79
chr22	21294276	21295119	844	*	8.00268	5.48544	8.87083	-3.17135	2.58696e-18	3.94887e-16	34.81	54.79	360.57	575.74
chr4	4614741	4615721	981	*	8.40732	6.18103	9.24428	-2.90054	2.61851e-18	3.99434e-16	71.07	74.04	478.05	734.89
chr16	29651389	29651891	503	*	7.63166	4.91017	8.51792	-3.35131	2.62545e-18	4.00224e-16	27.56	32.58	268.95	464.18
chr6	34452609	34453025	417	*	6.70361	7.59232	3.95204	3.37412	2.63202e-18	4.00956e-16	166.81	219.16	18.47	12.48
chr5	172158491	172158688	198	*	6.5514	7.45258	3.63439	3.5128	2.63879e-18	4.01717e-16	171.16	179.18	16.26	8.58
chr2	239489664	239490163	500	*	7.13717	4.13525	8.04419	-3.58736	2.64867e-18	4.02952e-16	18.86	16.29	213.53	314.39
chr12	44206789	44207065	277	*	6.48611	7.3921	3.49952	3.57143	2.65132e-18	4.03037e-16	150.85	185.1	14.04	8.58
chr16	74808077	74809106	1030	*	9.59706	10.384	7.73215	2.54358	2.65336e-18	4.03037e-16	1285.13	1387.5	180.28	244.96
chr15	74852914	74853211	298	*	6.27587	7.19613	3.05898	3.76042	2.65456e-18	4.03037e-16	137.8	155.48	8.87	7.8
chr17	73597331	73597844	514	*	7.7524	8.57777	5.6195	2.81204	2.73267e-18	4.14619e-16	420.64	343.54	41.38	56.95
chr15	80933674	80934093	420	*	8.24648	5.68549	9.11875	-3.21065	2.73603e-18	4.14851e-16	34.81	68.12	430.02	681.84
chr4	108568591	108569138	548	*	7.61279	5.07314	8.48307	-3.18944	2.75198e-18	4.16991e-16	37.71	29.62	288.9	426.73
chr19	33780892	33781222	331	*	6.84002	7.70504	4.3551	3.14043	2.75843e-18	4.17688e-16	224.83	192.5	21.43	19.5
chr7	50343244	50344510	1267	*	8.39149	9.19631	6.40911	2.66298	2.77487e-18	4.19898e-16	543.93	629.33	71.67	98.3
chr11	118177296	118177692	397	*	6.41765	7.32815	3.36236	3.63358	2.79434e-18	4.22562e-16	139.25	182.14	8.87	11.7
chr5	81834331	81834945	615	*	8.36728	5.97918	9.22245	-3.05243	2.81374e-18	4.25212e-16	56.57	69.6	441.1	753.61
chr2	64515390	64516137	748	*	9.52189	7.48908	10.3339	-2.71234	2.8306e-18	4.27476e-16	166.81	192.5	1036.63	1544.66
chr6	145804306	145805034	729	*	7.13324	8.02098	4.39358	3.36154	2.8667e-18	4.32638e-16	224.83	294.68	29.55	12.48
chr12	57575318	57575997	680	*	8.17481	5.87196	9.02067	-2.97211	2.89155e-18	4.361e-16	63.82	53.31	411.55	627.23
chr15	42392424	42393087	664	*	7.31993	8.15954	5.07135	2.91957	2.90625e-18	4.38025e-16	269.79	302.08	39.16	28.08
chr4	48485165	48486442	1278	*	9.22446	9.99646	7.45031	2.44914	2.93132e-18	4.4151e-16	1016.79	1026.18	162.55	187.23
chr19	42069618	42070456	839	*	7.50539	8.32257	5.43463	2.74956	2.93389e-18	4.41603e-16	326.36	313.93	43.59	42.91
chr22	38587827	38588367	541	*	7.52149	8.34822	5.37805	2.81926	2.9465e-18	4.43209e-16	343.77	308	47.29	35.89
chr1	67772894	67773784	891	*	7.83857	8.65314	5.78703	2.72958	2.94948e-18	4.43362e-16	372.77	432.39	62.06	48.37
chr1	179560609	179561477	869	*	7.47919	8.33018	5.13001	3.01306	2.96687e-18	4.45681e-16	306.05	337.62	45.07	24.96
chr8	96478446	96478821	376	*	7.30083	8.13881	5.06611	2.90952	3.01928e-18	4.53254e-16	306.05	257.66	29.55	37.45
chr4	15184025	15184754	730	*	7.68526	8.49785	5.64811	2.71656	3.12009e-18	4.68077e-16	336.51	386.48	48.03	52.27
chr9	94797415	94798366	952	*	8.00243	5.48446	8.87065	-3.17059	3.17879e-18	4.76296e-16	37.71	51.83	348.74	587.44
chr6	27279687	27280918	1232	*	8.83998	9.62804	6.96828	2.55009	3.17907e-18	4.76296e-16	728.14	854.41	111.57	138.86
chr8	122897597	122898043	447	*	7.28967	4.55525	8.17699	-3.36264	3.18877e-18	4.77434e-16	17.41	29.62	251.95	326.88
chr3	54892362	54892774	413	*	7.53037	4.63548	8.42998	-3.49614	3.22563e-18	4.82634e-16	30.46	19.25	249	440.78
chrX	123390010	123390509	500	*	8.60705	6.2222	9.46187	-3.04806	3.22891e-18	4.82807e-16	82.68	66.64	504.65	905.73
chr4	115484623	115485150	528	*	6.60517	7.50717	3.67668	3.5206	3.25764e-18	4.86781e-16	162.45	201.39	16.99	8.58
chr11	93063119	93064180	1062	*	8.19882	9.00193	6.22815	2.65047	3.26551e-18	4.87635e-16	464.16	561.22	67.24	82.69
chr3	53855571	53856109	539	*	7.73545	8.55888	5.61763	2.79385	3.26938e-18	4.87893e-16	400.33	353.91	57.63	40.57
chr5	154208847	154209897	1051	*	8.32219	9.14086	6.24037	2.76137	3.31535e-18	4.94427e-16	535.23	593.79	58.37	92.84
chr4	58217601	58218253	653	*	7.00265	7.85672	4.62489	3.04186	3.34987e-18	4.99247e-16	207.42	256.18	24.38	24.96
chr4	187475746	187476912	1167	*	9.01895	9.81783	7.07691	2.62166	3.37539e-18	5.0272e-16	851.44	953.63	110.09	159.93
chr14	37125117	37125858	742	*	7.14735	7.98641	4.90342	2.91557	3.4092e-18	5.07423e-16	246.58	260.62	31.77	28.08
chr13	102438258	102438580	323	*	6.78479	7.64945	4.30356	3.13692	3.41228e-18	5.07548e-16	200.17	201.39	19.21	20.28
chr15	43442381	43443177	797	*	9.43702	7.42722	10.2458	-2.68863	3.42417e-18	5.08983e-16	179.86	164.37	981.21	1447.15
chr16	78441048	78441580	533	*	8.17496	5.62051	9.04662	-3.20293	3.51003e-18	5.21335e-16	39.16	59.23	381.25	676.38
chr5	79491681	79492340	660	*	9.01829	6.92549	9.83843	-2.77033	3.51187e-18	5.21335e-16	129.09	114.02	725.57	1105.45
chr3	18087654	18088304	651	*	7.03326	3.79867	7.95451	-3.77245	3.52389e-18	5.22778e-16	14.5	13.33	196.54	299.57
chr2	16079674	16081018	1345	*	8.50281	9.28313	6.67907	2.50001	3.531e-18	5.2349e-16	604.85	641.18	101.96	102.98
chr14	21553179	21553511	333	*	7.76444	5.16166	8.64052	-3.24352	3.55385e-18	5.26534e-16	46.42	25.17	319.93	478.22
chr6	27247273	27248190	918	*	7.69182	8.5071	5.63505	2.73496	3.57931e-18	5.2996e-16	326.36	401.29	50.24	49.15
chr12	612123	612632	510	*	6.73292	7.61295	4.08536	3.28143	3.60003e-18	5.32679e-16	184.21	207.31	20.69	13.26
chr11	28688104	28688671	568	*	8.73329	6.60513	9.55806	-2.80447	3.66284e-18	5.4162e-16	107.34	87.37	607.35	900.27
chr15	53097622	53098485	864	*	7.86917	8.67106	5.9069	2.64123	3.69532e-18	5.46067e-16	387.28	427.95	58.37	61.63
chr18	10497281	10497792	512	*	7.18322	4.13649	8.09317	-3.62197	3.70079e-18	5.46298e-16	17.41	17.77	208.36	337.8
chr19	11678911	11679414	504	*	7.51241	8.32889	5.44691	2.74354	3.7017e-18	5.46298e-16	333.61	309.48	44.33	42.91
chr13	24756181	24756532	352	*	7.39526	4.54686	8.29145	-3.45546	3.70747e-18	5.46794e-16	30.46	16.29	248.26	378.36
chr3	196368663	196368967	305	*	6.35789	7.26506	3.35365	3.58591	3.78302e-18	5.57574e-16	159.55	148.08	11.08	9.36
chr5	11384578	11385713	1136	*	8.01692	8.86338	5.70875	2.97419	3.85237e-18	5.67427e-16	422.09	509.39	68.71	35.89
chr6	70834936	70835608	673	*	8.00469	8.80107	6.07929	2.60403	3.92308e-18	5.77466e-16	464.16	427.95	65.02	70.21
chr22	18466875	18467223	349	*	6.73213	7.61071	4.10106	3.27239	3.95655e-18	5.82016e-16	213.22	177.69	14.04	20.28
chr5	61544025	61544387	363	*	6.31214	7.22337	3.24541	3.63776	3.96124e-18	5.82327e-16	153.75	145.12	9.61	9.36
chr20	5824722	5825395	674	*	8.58987	9.38318	6.68457	2.58402	3.97465e-18	5.8392e-16	645.47	690.05	87.93	117.8
chr14	29237057	29237722	666	*	7.54117	8.38233	5.27931	2.93036	4.00186e-18	5.87538e-16	306.05	361.31	48.03	29.65
chr9	439445	439923	479	*	8.48732	6.38311	9.30897	-2.78085	4.01209e-18	5.88659e-16	89.93	77	529.77	738.79
chr11	94643928	94644410	483	*	8.45992	6.3193	9.28629	-2.81641	4.04172e-18	5.92623e-16	81.23	78.48	506.86	741.91
chr17	72667168	72667874	707	*	8.53531	9.33532	6.58568	2.62888	4.04879e-18	5.93275e-16	604.85	687.08	80.54	111.56
chr11	129245086	129246244	1159	*	9.07919	9.85512	7.28185	2.47263	4.06738e-18	5.95615e-16	928.31	924.01	140.38	170.85
chr17	72292708	72293069	362	*	6.97933	7.83855	4.55225	3.0848	4.09039e-18	5.98598e-16	201.62	256.18	25.86	21.06
chr10	98934738	98935048	311	*	6.091	7.05047	1.91719	4.44409	4.11588e-18	6.01941e-16	139.25	125.87	4.43	3.12
chr6	106804279	106804617	339	*	6.70032	7.5949	3.87337	3.43342	4.19928e-18	6.13741e-16	204.52	182.14	19.95	9.36
chr8	686981	687967	987	*	7.99509	8.79141	6.07006	2.60323	4.22117e-18	6.16301e-16	465.61	420.54	66.5	67.87
chr11	128048967	128049343	377	*	7.46687	4.59728	8.36463	-3.47482	4.22385e-18	6.16301e-16	21.76	26.65	237.18	422.05
chr4	171180745	171181278	534	*	6.73742	7.60602	4.21543	3.17177	4.22494e-18	6.16301e-16	203.07	186.58	19.21	17.94
chr12	5493012	5493677	666	*	9.3085	7.18149	10.1331	-2.80327	4.23832e-18	6.17855e-16	137.8	152.52	852.65	1393.32
chr11	14332201	14332635	435	*	8.16682	5.82083	9.01747	-3.01184	4.25664e-18	6.20053e-16	46.42	66.64	410.81	625.67
chr6	12460363	12460954	592	*	7.24511	4.19359	8.15537	-3.62393	4.25886e-18	6.20053e-16	20.31	16.29	210.58	359.64
chr1	90739969	90740386	418	*	6.38851	7.30145	3.29449	3.65568	4.30774e-18	6.26766e-16	137.8	177.69	11.82	7.8
chr10	118386757	118387544	788	*	8.10789	8.90144	6.20101	2.58453	4.31988e-18	6.2813e-16	506.22	450.16	75.36	71.77
chr11	108430565	108431102	538	*	9.01817	6.83025	9.85048	-2.86228	4.35647e-18	6.33045e-16	92.83	134.75	730	1116.37
chr1	217283301	217283790	490	*	6.58864	7.47039	3.92112	3.29985	4.3637e-18	6.33689e-16	175.51	179.18	16.26	14.04
chr3	55367992	55368461	470	*	8.11561	5.69812	8.97385	-3.07611	4.36776e-18	6.33873e-16	62.37	41.46	390.86	614.74
chr1	10143007	10143782	776	*	7.85586	5.40951	8.71704	-3.1033	4.41756e-18	6.4069e-16	42.06	42.94	323.62	518.01
chr12	53611065	53611369	305	*	8.98018	9.76527	7.12713	2.53015	4.47417e-18	6.48485e-16	894.95	845.53	120.44	159.15
chr6	72431352	72431830	479	*	6.43426	7.33302	3.55098	3.4833	4.51147e-18	6.53475e-16	158.1	164.37	13.3	10.14
chr3	13503073	13503420	348	*	7.33558	8.16251	5.19053	2.8214	4.58091e-18	6.63056e-16	284.3	288.75	33.25	39.79
chr4	154126934	154127403	470	*	7.3725	8.20709	5.16595	2.87786	4.58346e-18	6.63056e-16	274.14	316.89	41.38	30.43
chr1	112214974	112215354	381	*	7.53748	4.76541	8.42782	-3.39267	4.58687e-18	6.63126e-16	18.86	35.54	267.47	421.27
chr8	43135989	43136483	495	*	7.21176	8.04338	5.02939	2.85668	4.60001e-18	6.64601e-16	261.09	266.54	31.77	33.55
chr12	90674973	90675591	619	*	7.38201	4.54686	8.27721	-3.44271	4.61724e-18	6.66666e-16	30.46	16.29	246.78	373.68
chr11	1474642	1475255	614	*	7.84378	8.65341	5.82775	2.69321	4.70325e-18	6.78653e-16	365.52	439.79	61.33	52.27
chr3	68715844	68716305	462	*	6.27507	7.19568	3.05182	3.75704	4.71956e-18	6.80574e-16	142.15	151.04	10.34	6.24
chr1	228192029	228192603	575	*	7.64955	8.46744	5.5736	2.75437	4.72794e-18	6.8135e-16	349.57	358.35	40.64	54.61
chr6	40921228	40921628	401	*	8.21497	5.84075	9.06866	-3.03786	4.74773e-18	6.83767e-16	42.06	72.56	438.89	635.03
chr1	44825247	44825571	325	*	7.96326	8.76725	5.98659	2.65476	4.76061e-18	6.85187e-16	390.18	481.26	62.06	64.75
chr18	13512976	13513457	482	*	6.86291	7.72526	4.40487	3.11227	4.77093e-18	6.86236e-16	226.28	196.94	23.64	18.72
chr2	109237542	109238046	505	*	7.06355	7.91035	4.75232	2.97836	4.77767e-18	6.8677e-16	217.57	263.58	26.6	27.3
chr9	137488830	137489129	300	*	7.24687	8.07929	5.05809	2.86135	4.79065e-18	6.882e-16	262.54	278.39	36.2	30.43
chr1	225924915	225925172	258	*	6.84195	7.7019	4.40767	3.09131	4.84615e-18	6.95733e-16	197.27	219.16	22.17	20.28
chr15	42225988	42226363	376	*	9.07003	9.86406	7.16002	2.58813	4.91954e-18	7.05822e-16	944.27	919.57	116.74	169.29
chr4	177359550	177359958	409	*	7.38382	4.50235	8.28246	-3.48168	5.0004e-18	7.16969e-16	27.56	17.77	234.22	388.51
chr9	17630392	17631123	732	*	8.53809	6.13462	9.39487	-3.06301	5.05725e-18	7.24574e-16	78.33	62.19	477.31	869.07
chr17	43799599	43799905	307	*	7.29767	8.1302	5.1079	2.86243	5.05983e-18	7.24574e-16	253.83	306.52	36.2	32.77
chr6	91107633	91108055	423	*	6.72592	7.59649	4.18318	3.18817	5.19663e-18	7.43695e-16	184.21	202.87	19.95	16.38
chr4	23292285	23292666	382	*	6.10609	7.05801	2.17496	4.27537	5.20857e-18	7.44934e-16	143.6	122.91	5.91	3.12
chr6	27218712	27219897	1186	*	9.997	10.7583	8.28394	2.38337	5.25136e-18	7.50581e-16	1744.93	1719.19	292.59	330.78
chr2	111574019	111574592	574	*	7.1104	7.95188	4.84588	2.93278	5.26534e-18	7.52105e-16	253.83	241.37	31.77	25.74
chr16	90060867	90062667	1801	*	9.30328	10.1057	7.33731	2.64418	5.30182e-18	7.5684e-16	979.08	1224.61	131.52	191.91
chr11	78893804	78894234	431	*	7.34085	4.46338	8.23919	-3.48139	5.3244e-18	7.59301e-16	14.5	29.62	242.35	361.98
chr11	117841307	117841730	424	*	6.64126	7.52146	3.9917	3.28321	5.32576e-18	7.59301e-16	201.62	165.85	16.99	14.82
chr10	31092753	31093971	1219	*	10.3259	8.31527	11.1348	-2.68803	5.35022e-18	7.62309e-16	339.41	297.64	1740.03	2756.99
chr3	132826250	132826729	480	*	7.35799	8.19323	5.14607	2.88519	5.38509e-18	7.66795e-16	261.09	324.29	31.03	39.79
chr18	35154105	35154484	380	*	6.56009	7.45246	3.76212	3.40819	5.44756e-18	7.75205e-16	172.61	177.69	16.99	10.14
chr6	160097802	160099336	1535	*	7.75207	5.35728	8.60794	-3.05444	5.5162e-18	7.8448e-16	44.97	37.02	317.71	462.62
chr9	139947918	139948793	876	*	8.59676	9.37676	6.77495	2.49719	5.55303e-18	7.88891e-16	645.47	684.12	101.22	117.8
chr5	115911804	115912303	500	*	8.17188	8.99657	6.0443	2.80393	5.55417e-18	7.88891e-16	433.7	587.87	53.2	78.79
chr20	23029012	23031907	2896	*	10.8231	11.5846	9.10889	2.38443	5.66427e-18	8.04025e-16	2964.79	3177.77	495.78	608.5
chr6	112737892	112738683	792	*	7.67572	4.79552	8.57426	-3.47969	5.68663e-18	8.06695e-16	34.81	20.73	263.04	499.29
chr1	72182587	72183235	649	*	7.31363	4.63987	8.19591	-3.30496	5.72605e-18	8.11779e-16	23.21	26.65	240.87	345.6
chr14	54605284	54606092	809	*	7.73019	5.11023	8.6078	-3.25881	5.79668e-18	8.21278e-16	24.66	44.42	305.15	475.1
chr9	125206419	125207145	727	*	8.862	6.52124	9.71207	-3.00561	5.80387e-18	8.21723e-16	66.72	116.98	653.16	1024.31
chr1	88928190	88928966	777	*	9.24342	10.0654	7.13687	2.7831	5.80706e-18	8.21723e-16	1051.6	1091.34	100.49	180.99
chr8	59559315	59559823	509	*	7.8316	5.22658	8.70787	-3.245	5.84193e-18	8.26142e-16	30.46	44.42	307.37	528.93
chr5	149773606	149774105	500	*	8.32207	5.96285	9.17415	-3.02238	5.87142e-18	8.29795e-16	53.67	71.08	432.98	722.4
chr17	13421449	13422273	825	*	7.43727	4.55246	8.33614	-3.48501	5.8907e-18	8.32001e-16	21.76	25.17	230.53	415.81
chr5	135309033	135309628	596	*	9.31641	7.30531	10.1253	-2.68807	5.90391e-18	8.33347e-16	168.26	148.08	901.42	1332.47
chr2	200904397	200904993	597	*	9.26265	7.12919	10.0881	-2.80819	5.92648e-18	8.36013e-16	136.35	143.64	817.19	1359.77
chr8	143626786	143627440	655	*	8.14875	8.9403	6.25476	2.57084	5.95518e-18	8.3954e-16	461.25	521.24	73.15	79.57
chr7	155595747	155596994	1248	*	8.5976	9.38644	6.72096	2.55356	5.99165e-18	8.44157e-16	642.57	695.97	91.62	119.36
chr16	17614416	17614802	387	*	7.1668	3.87643	8.09112	-3.81265	6.02002e-18	8.47627e-16	11.6	17.77	194.32	351.06
chr1	206753059	206753565	507	*	8.576	9.36716	6.68457	2.56869	6.04366e-18	8.50428e-16	642.57	678.2	87.93	117.8
chr22	40123549	40123918	370	*	7.20409	8.04512	4.94345	2.93001	6.08343e-18	8.54932e-16	230.63	297.64	29.55	31.99
chr1	147780727	147781378	652	*	6.53343	7.44272	3.49689	3.60486	6.09003e-18	8.54932e-16	143.6	204.35	14.78	7.8
chr14	78488351	78488813	463	*	7.37648	8.20213	5.24148	2.80847	6.0903e-18	8.54932e-16	300.25	288.75	42.12	33.55
chr6	109092545	109093126	582	*	7.30285	4.13649	8.22018	-3.7139	6.09075e-18	8.54932e-16	17.41	17.77	202.45	393.97
chr5	66761317	66761849	533	*	7.18102	4.18881	8.0874	-3.57055	6.10755e-18	8.5676e-16	26.11	10.37	233.48	310.49
chr8	90681528	90681981	454	*	7.36572	4.63723	8.25256	-3.35085	6.11225e-18	8.56891e-16	27.56	22.21	239.39	370.56
chr17	16736111	16736689	579	*	6.15094	7.11934	1.62259	4.67398	6.11885e-18	8.57285e-16	156.65	121.42	1.48	4.68
chr1	178201957	178202618	662	*	8.14913	5.90762	8.98791	-2.91103	6.14266e-18	8.59598e-16	65.27	54.79	410.07	605.38
chr15	64265081	64266148	1068	*	9.03352	6.83731	9.86685	-2.86844	6.14293e-18	8.59598e-16	110.24	118.46	687.88	1179.56
chr5	34762327	34763320	994	*	9.42346	7.25412	10.2535	-2.84292	6.16266e-18	8.61755e-16	129.09	176.21	930.23	1511.12
chr13	101919782	101920491	710	*	6.85089	7.72805	4.23596	3.24919	6.17095e-18	8.61755e-16	187.11	236.93	23.64	14.04
chr15	63556689	63557409	721	*	7.00954	3.54779	7.94253	-3.93998	6.17302e-18	8.61755e-16	14.5	8.88	186.19	305.81
chr4	37454592	37455778	1187	*	8.60303	9.39268	6.72124	2.55876	6.17523e-18	8.61755e-16	648.37	695.97	90.88	120.14
chr13	34882774	34883223	450	*	7.27422	4.41002	8.17158	-3.46723	6.17734e-18	8.61755e-16	20.31	22.21	220.92	355.74
chr10	81160293	81160781	489	*	8.35027	9.17441	6.227	2.79966	6.18188e-18	8.61858e-16	539.58	616.01	55.41	94.4
chr5	145459118	145459813	696	*	7.54134	8.36332	5.43463	2.78209	6.3485e-18	8.84106e-16	369.87	288.75	43.59	42.91
chr8	61495870	61496743	874	*	8.34253	5.82315	9.21089	-3.16872	6.34926e-18	8.84106e-16	37.71	75.52	458.1	727.08
chr15	39699262	39699876	615	*	8.38795	6.09085	9.23316	-2.96369	6.37101e-18	8.8659e-16	66.72	69.6	449.23	754.39
chr11	127355306	127355887	582	*	7.02945	7.89906	4.49689	3.17575	6.38796e-18	8.88404e-16	255.29	222.12	29.55	15.6
chr5	66975856	66976519	664	*	7.45529	4.76058	8.33934	-3.32189	6.40193e-18	8.89801e-16	27.56	26.65	246.78	400.99
chr9	87532288	87532970	683	*	6.68335	7.56449	4.02299	3.29008	6.53762e-18	9.08104e-16	165.36	213.23	18.47	14.04
chr14	75665867	75666305	439	*	7.2059	4.19	8.11384	-3.58963	6.73968e-18	9.35599e-16	24.66	11.85	220.92	333.12
chr20	18039517	18040008	492	*	7.20406	8.04866	4.91235	2.96025	6.75056e-18	9.36537e-16	239.33	290.23	25.12	35.11
chr3	162256275	162257135	861	*	8.58064	6.46928	9.40322	-2.78594	6.76885e-18	9.385e-16	94.28	82.92	546.76	807.44
chr1	103324209	103324673	465	*	8.52474	6.32094	9.359	-2.87544	6.83637e-18	9.47282e-16	72.52	87.37	510.56	802.76
chr1	7765375	7765644	270	*	7.53148	8.36147	5.36229	2.84026	6.85438e-18	9.49197e-16	339.41	318.37	49.5	32.77
chr8	117013006	117013483	478	*	7.12638	4.13649	8.03259	-3.57051	6.90695e-18	9.55894e-16	17.41	17.77	205.4	318.29
chr22	24138641	24139224	584	*	7.14194	4.30586	8.03721	-3.44217	7.05071e-18	9.75195e-16	20.31	19.25	217.23	308.15
chr8	72194737	72195460	724	*	9.00956	6.90962	9.83065	-2.77503	7.06281e-18	9.76274e-16	114.59	125.87	706.36	1114.81
chr1	6217552	6218323	772	*	8.52055	9.30503	6.67123	2.52417	7.19117e-18	9.93411e-16	684.63	580.47	107.87	95.96
chr19	55953392	55954253	862	*	7.59467	8.40746	5.55605	2.71471	7.20658e-18	9.94933e-16	311.85	367.23	47.29	46.81
chr3	179754423	179755239	817	*	8.3065	9.12158	6.25121	2.72987	7.22222e-18	9.96486e-16	543.93	570.1	93.84	58.51
chr2	218433051	218433844	794	*	8.07156	5.79906	8.91395	-2.93981	7.30699e-18	1.00757e-15	56.57	54.79	382.73	581.98
chr7	110583625	110584357	733	*	7.97878	5.50668	8.84254	-3.12428	7.41585e-18	1.02196e-15	42.06	48.87	336.92	581.2
chr5	1013238	1013543	306	*	6.81043	7.66961	4.38377	3.08304	7.51185e-18	1.03456e-15	213.22	193.98	20.69	21.06
chr7	96634623	96634920	298	*	7.04569	7.8977	4.68712	3.01931	7.53559e-18	1.0372e-15	205.97	270.98	27.34	24.18
chr1	13839512	13841020	1509	*	8.11725	8.95833	5.8561	2.92718	7.55664e-18	1.03947e-15	507.67	487.18	76.84	39.01
chr11	70564046	70564576	531	*	7.32956	8.15573	5.19053	2.81359	7.58084e-18	1.04216e-15	271.24	299.12	33.25	39.79
chr14	101180393	101181222	830	*	8.33583	9.12224	6.47449	2.53685	7.61773e-18	1.0466e-15	519.27	595.28	84.23	93.62
chr17	73120200	73120850	651	*	7.63678	8.4471	5.61587	2.69768	7.67168e-18	1.05275e-15	327.81	370.2	45.81	52.27
chr4	52978186	52978825	640	*	7.91784	5.22833	8.80145	-3.31779	7.67723e-18	1.05275e-15	26.11	48.87	323.62	568.72
chr12	69197136	69197520	385	*	7.50396	4.80337	8.3885	-3.32754	7.67914e-18	1.05275e-15	20.31	35.54	263.78	406.45
chr12	51199924	51200517	594	*	7.56308	4.97675	8.43768	-3.22559	7.68104e-18	1.05275e-15	33.36	29.62	266.73	426.73
chr3	142623297	142623893	597	*	7.44613	8.28428	5.20989	2.90748	7.74474e-18	1.06084e-15	278.49	345.02	29.55	44.47
chr8	67032082	67032429	348	*	7.76937	8.60402	5.56237	2.87889	7.80654e-18	1.06866e-15	316.21	462	39.9	54.61
chr19	10800844	10801465	622	*	8.67807	6.52786	9.50566	-2.82303	7.81881e-18	1.06969e-15	97.18	87.37	564.49	889.35
chr2	96861031	96861541	511	*	8.00224	5.63679	8.85499	-3.02558	7.83854e-18	1.07174e-15	56.57	42.94	362.04	564.04
chr17	11143383	11145136	1754	*	8.61155	9.44309	6.42978	2.85223	7.85029e-18	1.0727e-15	628.06	764.09	111.57	60.85
chr1	245878567	245879122	556	*	7.97045	8.76865	6.03298	2.61298	7.96238e-18	1.08737e-15	420.64	451.64	71.67	59.29
chr13	95506786	95507211	426	*	6.54908	7.44058	3.76212	3.39612	8.03274e-18	1.09631e-15	168.26	179.18	16.99	10.14
chr8	131391906	131392289	384	*	7.27091	8.12272	4.91423	3.01538	8.07773e-18	1.10179e-15	250.93	306.52	37.68	22.62
chr1	6483461	6484031	571	*	8.14714	8.94261	6.22776	2.59596	8.21119e-18	1.11932e-15	456.9	527.16	67.98	81.91
chr4	13537405	13538009	605	*	7.1263	7.96048	4.92309	2.8737	8.26406e-18	1.12527e-15	253.83	244.33	31.03	29.65
chr10	102321735	102323073	1339	*	9.32961	10.1148	7.47584	2.52911	8.26475e-18	1.12527e-15	1090.77	1126.88	148.51	207.52
chr7	96653537	96654278	742	*	7.77092	8.58694	5.7088	2.73696	8.29584e-18	1.12883e-15	329.26	439.79	54.68	49.93
chr15	81152209	81152530	322	*	7.45005	4.68549	8.33979	-3.38238	8.32449e-18	1.13205e-15	17.41	34.06	257.13	390.85
chr3	139036511	139036933	423	*	7.81366	8.61166	5.87747	2.61215	8.38815e-18	1.14002e-15	401.78	380.56	59.85	57.73
chr1	147189090	147189776	687	*	6.77578	7.65433	4.14515	3.26067	8.39562e-18	1.14035e-15	205.97	196.94	22.9	12.48
chr6	135796420	135796982	563	*	7.93317	5.31027	8.81104	-3.25888	8.45384e-18	1.14757e-15	29.01	50.35	328.8	569.5
chr5	102012941	102013396	456	*	7.94016	5.48495	8.80224	-3.10883	8.48359e-18	1.15092e-15	36.26	53.31	342.83	549.99
chr6	43895526	43895778	253	*	6.44416	7.34728	3.49952	3.5278	8.53498e-18	1.1572e-15	146.5	179.18	14.04	8.58
chr15	63224600	63225084	485	*	8.7386	6.4944	9.5777	-2.91265	8.55474e-18	1.15919e-15	87.03	93.29	558.58	969.71
chr4	185574827	185575189	363	*	8.47997	6.33261	9.3072	-2.81998	8.711e-18	1.17966e-15	81.23	79.96	501.69	765.31
chr17	17632221	17632555	335	*	7.66312	8.47377	5.63983	2.7	8.73025e-18	1.18156e-15	342.31	368.72	44.33	55.39
chr12	54984762	54985276	515	*	7.56875	8.39358	5.44007	2.80037	8.75379e-18	1.18404e-15	339.41	333.18	51.72	35.11
chr4	5205681	5206081	401	*	7.53933	4.94171	8.41495	-3.23433	8.83167e-18	1.19386e-15	34.81	26.65	265.25	417.37
chr4	4714342	4715232	891	*	9.02546	7.01079	9.83489	-2.69034	8.889e-18	1.20089e-15	129.09	128.83	735.91	1090.63
chr11	17519630	17520317	688	*	7.87834	8.67485	5.95209	2.60237	8.96104e-18	1.20991e-15	426.44	390.93	59.85	63.97
chr11	133817030	133817620	591	*	8.10069	8.88857	6.2301	2.54535	8.99219e-18	1.21339e-15	487.36	460.52	77.58	72.55
chr16	87447826	87448308	483	*	7.00247	7.86683	4.52419	3.12619	9.02095e-18	1.21655e-15	263.99	202.87	28.08	17.94
chr14	77653166	77653767	602	*	7.43297	8.25082	5.35728	2.75062	9.06343e-18	1.22151e-15	324.91	284.31	40.64	41.35
chr3	13275696	13276015	320	*	6.38159	7.30145	3.17166	3.73828	9.06853e-18	1.22151e-15	137.8	177.69	12.56	5.46
chr20	45653062	45653667	606	*	8.16404	5.83693	9.01261	-2.98999	9.11944e-18	1.22764e-15	56.57	57.75	389.38	643.61
chr8	142583386	142583798	413	*	6.77594	7.64314	4.26861	3.15277	9.20981e-18	1.23907e-15	213.22	186.58	22.17	16.38
chr20	5623169	5623804	636	*	8.09345	5.6165	8.95769	-3.12688	9.2478e-18	1.24344e-15	52.22	45.9	353.92	640.49
chr17	72542004	72542409	406	*	7.08917	7.94171	4.72567	3.02226	9.25726e-18	1.24359e-15	278.49	213.23	30.29	22.62
chr1	32684662	32684988	327	*	7.57905	5.01028	8.45204	-3.20907	9.26198e-18	1.24359e-15	33.36	31.1	268.21	432.19
chr11	69794399	69794967	569	*	8.19457	8.98051	6.33617	2.53286	9.26533e-18	1.24359e-15	478.66	531.6	82.01	79.57
chr11	109483237	109483659	423	*	6.43032	7.32529	3.59821	3.4358	9.2791e-18	1.2447e-15	169.71	151.04	13.3	10.92
chr18	77394475	77395203	729	*	8.44462	9.25272	6.43938	2.67977	9.31998e-18	1.24944e-15	572.94	647.1	104.92	68.65
chr1	166895054	166895636	583	*	7.3841	8.21283	5.22494	2.82947	9.6454e-18	1.29231e-15	303.15	290.23	43.59	31.21
chr9	129464774	129465042	269	*	6.85161	7.71015	4.43119	3.07459	9.78677e-18	1.31022e-15	224.83	193.98	23.64	19.5
chr15	39885765	39885961	197	*	7.69259	5.27748	8.55057	-3.07004	9.79062e-18	1.31022e-15	43.51	34.06	303.67	446.24
chr3	149172520	149172986	467	*	8.11356	5.81773	8.95863	-2.96032	9.80029e-18	1.31074e-15	58.02	54.79	384.21	610.84
chr7	22674859	22675410	552	*	7.27807	4.1912	8.19057	-3.64436	9.95499e-18	1.33064e-15	23.21	13.33	209.84	374.46
chr17	59324872	59325251	380	*	7.8991	5.43139	8.76242	-3.11756	9.9952e-18	1.33523e-15	50.77	35.54	331.01	537.51
chr10	106398625	106398900	276	*	7.19789	8.03243	4.9917	2.87507	1.00371e-17	1.34003e-15	239.33	284.31	33.99	29.65
chr1	6317644	6317926	283	*	7.23241	8.06226	5.06433	2.84044	1.00494e-17	1.34089e-15	282.84	251.73	31.03	35.89
chr1	53508874	53509401	528	*	7.80389	5.48055	8.65204	-2.98543	1.01001e-17	1.34687e-15	49.32	39.98	331.01	473.54
chr16	77392930	77393380	451	*	6.98358	7.82832	4.69058	2.95809	1.01961e-17	1.35887e-15	214.67	239.89	25.12	26.52
chr11	35356200	35356643	444	*	7.72491	5.19299	8.59446	-3.17515	1.02354e-17	1.3633e-15	42.06	31.1	294.07	479
chr15	40253292	40253687	396	*	7.06296	3.94313	7.9775	-3.6719	1.02704e-17	1.36716e-15	15.96	14.81	193.58	310.49
chr3	24263898	24264412	515	*	8.42184	6.12342	9.2672	-2.96319	1.03068e-17	1.3712e-15	59.47	79.96	465.49	766.87
chr11	69532932	69533371	440	*	7.29917	8.12841	5.13594	2.83336	1.0317e-17	1.37175e-15	287.2	272.46	39.9	30.43
chr1	41788568	41788910	343	*	7.48605	8.29909	5.44554	2.71495	1.04188e-17	1.38448e-15	324.91	305.04	45.81	41.35
chr20	61817931	61818409	479	*	7.65427	8.47737	5.53893	2.78735	1.05279e-17	1.39816e-15	398.88	313.93	53.2	39.79
chr17	66796716	66797332	617	*	7.31686	4.35248	8.22134	-3.54348	1.0691e-17	1.41899e-15	29.01	11.85	235.7	361.2
chr5	174039519	174040043	525	*	6.4856	7.37131	3.77087	3.33583	1.07234e-17	1.42245e-15	168.26	162.89	14.04	13.26
chr5	35884215	35884904	690	*	10.1138	8.16221	10.9141	-2.62691	1.07707e-17	1.4279e-15	290.1	282.83	1522.06	2337.28
chrX	39817216	39817819	604	*	7.57713	8.39637	5.49107	2.76144	1.0868e-17	1.43985e-15	348.12	325.77	37.68	52.27
chr2	171678637	171679092	456	*	7.33155	8.16305	5.15018	2.85015	1.08736e-17	1.43985e-15	274.14	299.12	41.38	29.65
chr1	176852948	176853380	433	*	7.22347	4.08091	8.13939	-3.69235	1.08917e-17	1.44141e-15	10.15	23.69	211.32	352.62
chr4	170258637	170259126	490	*	8.57417	6.23643	9.42391	-2.99865	1.10026e-17	1.45523e-15	82.68	68.12	489.87	883.89
chr10	115027922	115028599	678	*	9.19715	7.14944	10.0112	-2.72191	1.10837e-17	1.46511e-15	159.55	124.39	829.01	1234.95
chr11	74361447	74361997	551	*	7.84757	5.48397	8.70012	-3.02339	1.1104e-17	1.46694e-15	39.16	50.35	331.75	500.07
chr6	45625017	45625304	288	*	7.63878	5.22307	8.49682	-3.07025	1.12102e-17	1.4801e-15	39.16	35.54	291.85	430.63
chr7	50755420	50755951	532	*	7.38018	4.63811	8.26812	-3.35874	1.13584e-17	1.4988e-15	26.11	23.69	232.74	383.83
chr8	95031869	95032182	314	*	6.47704	7.36564	3.72679	3.36443	1.1391e-17	1.50222e-15	159.55	170.29	14.78	11.7
chr7	121646560	121647123	564	*	6.61411	7.50765	3.80087	3.41568	1.13992e-17	1.50244e-15	156.65	207.31	17.73	10.14
chr6	39809126	39809526	401	*	7.492	8.31342	5.38946	2.77719	1.14574e-17	1.50922e-15	307.5	328.73	35.47	48.37
chr6	6467293	6468019	727	*	6.64347	7.54828	3.67435	3.54384	1.14916e-17	1.51286e-15	155.2	219.16	17.73	7.8
chr17	8366323	8366996	674	*	8.72099	6.64858	9.5384	-2.74599	1.17007e-17	1.5395e-15	105.89	94.77	595.53	891.69
chr19	49959024	49959384	361	*	7.55334	4.8396	8.43896	-3.33556	1.17142e-17	1.54038e-15	23.21	34.06	255.65	438.43
chr2	233350295	233352868	2574	*	9.18173	9.95595	7.39453	2.45872	1.17727e-17	1.54716e-15	889.15	1097.26	176.59	159.93
chr10	63818659	63819572	914	*	7.98614	5.52715	8.84859	-3.10915	1.18123e-17	1.55148e-15	50.77	41.46	337.66	584.32
chr19	8791295	8792255	961	*	7.10326	7.95002	4.79241	2.97412	1.19511e-17	1.56879e-15	284.3	210.27	27.34	28.08
chr12	118406528	118407406	879	*	7.77035	8.57126	5.81469	2.63134	1.20419e-17	1.5798e-15	372.77	387.97	51.72	60.85
chr9	114124637	114125246	610	*	7.21113	4.13897	8.1227	-3.63364	1.21498e-17	1.59304e-15	14.5	20.73	201.71	355.74
chr7	69240090	69240623	534	*	7.51972	8.34621	5.37812	2.81517	1.2172e-17	1.59502e-15	316.21	334.66	33.25	49.93
chr12	55413554	55413967	414	*	8.31985	9.10073	6.49269	2.50043	1.21842e-17	1.5957e-15	529.43	568.62	85.71	94.4
chr5	115987931	115988420	490	*	6.78617	7.64891	4.32437	3.11027	1.22116e-17	1.59836e-15	207.42	193.98	22.9	17.16
chr13	39272101	39272428	328	*	6.33532	7.24509	3.29145	3.60511	1.23538e-17	1.61605e-15	149.4	154	12.56	7.02
chr20	1316642	1317151	510	*	6.84442	7.70222	4.43119	3.06659	1.23952e-17	1.62053e-15	192.91	223.6	23.64	19.5
chr20	9536369	9536874	506	*	6.8033	7.66511	4.35073	3.10154	1.24975e-17	1.63296e-15	203.07	202.87	23.64	17.16
chr1	58036903	58037657	755	*	7.59773	4.79631	8.49036	-3.40786	1.25078e-17	1.63302e-15	33.36	22.21	251.95	467.3
chr15	51389768	51390225	458	*	6.92708	7.77975	4.56237	3.02551	1.25123e-17	1.63302e-15	226.28	213.23	19.95	27.3
chr8	11561508	11561803	296	*	7.27979	8.10215	5.17009	2.78175	1.28258e-17	1.67266e-15	274.14	275.43	37.68	34.33
chr1	179697294	179697694	401	*	6.02899	6.98641	1.92505	4.38399	1.28381e-17	1.67266e-15	123.29	130.31	3.69	3.9
chr6	35368659	35369124	466	*	7.0388	7.89815	4.61045	3.08433	1.28382e-17	1.67266e-15	269.79	207.31	19.21	29.65
chr7	41359115	41359605	491	*	7.16291	4.40899	8.0518	-3.3682	1.28584e-17	1.67434e-15	21.76	20.73	219.44	311.27
chr9	89328845	89329227	383	*	6.89035	3.35461	7.82677	-3.98626	1.29337e-17	1.68316e-15	13.05	7.4	181.02	273.05
chr11	102551558	102552113	556	*	7.28456	4.68294	8.16053	-3.23732	1.29583e-17	1.6854e-15	21.76	29.62	243.83	328.44
chr2	192230890	192231476	587	*	8.59412	6.29536	9.43952	-2.96247	1.29734e-17	1.6864e-15	65.27	91.81	515.73	872.97
chr2	88417439	88417842	404	*	6.75415	7.61817	4.27938	3.12526	1.29929e-17	1.68797e-15	187.11	205.83	16.99	21.84
chr6	28564794	28565618	825	*	8.34027	9.15087	6.3174	2.69834	1.30607e-17	1.69581e-15	513.47	623.41	63.54	95.96
chr8	101012715	101013161	447	*	7.01081	3.72641	7.9348	-3.8014	1.30951e-17	1.6993e-15	8.7	17.77	191.37	298.01
chr12	42137598	42138029	432	*	6.49897	7.38559	3.77305	3.34478	1.31831e-17	1.70974e-15	152.3	182.14	13.3	14.04
chr12	130765743	130766545	803	*	7.38617	8.21107	5.25706	2.79995	1.33e-17	1.72392e-15	266.89	325.77	41.38	35.11
chr8	124512328	124512961	634	*	7.54564	4.87196	8.42791	-3.29851	1.33642e-17	1.73125e-15	31.91	26.65	252.69	436.09
chr10	114020952	114021634	683	*	8.5432	6.226	9.39068	-2.97944	1.33864e-17	1.73314e-15	63.82	85.89	491.35	851.12
chr2	225757229	225757822	594	*	7.84719	5.52904	8.69477	-2.9799	1.34128e-17	1.73556e-15	44.97	47.39	331.01	497.72
chr19	3932869	3933878	1010	*	7.70624	8.50542	5.76217	2.61876	1.34556e-17	1.73955e-15	366.97	359.83	53.94	54.61
chr15	81170707	81171377	671	*	8.37353	6.20989	9.20282	-2.83399	1.3459e-17	1.73955e-15	72.52	75.52	464.75	713.82
chr3	106664195	106664752	558	*	8.35738	6.15282	9.19172	-2.87336	1.34873e-17	1.74221e-15	63.82	78.48	458.84	710.7
chr10	28111163	28111843	681	*	8.35122	5.94633	9.20815	-3.06037	1.35305e-17	1.74681e-15	50.77	72.56	428.54	754.39
chr12	133195109	133195612	504	*	7.48961	8.2993	5.47315	2.69095	1.36376e-17	1.75963e-15	320.56	309.48	43.59	45.25
chr8	55382462	55383307	846	*	8.16893	8.95192	6.32882	2.51297	1.36742e-17	1.76335e-15	506.22	484.22	82.75	78.01
chr11	116736373	116736867	495	*	7.49536	4.87345	8.37314	-3.25376	1.37571e-17	1.77303e-15	29.01	29.62	251.21	411.91
chr19	17716488	17717556	1069	*	10.1736	10.9563	8.33548	2.51139	1.38011e-17	1.7777e-15	1949.45	2024.23	263.78	382.27
chr16	49518329	49518845	517	*	8.04864	8.83616	6.18034	2.54213	1.3928e-17	1.79302e-15	475.76	438.31	70.93	74.11
chr9	122713263	122714171	909	*	8.57031	6.33478	9.40839	-2.90265	1.39876e-17	1.79968e-15	69.62	91.81	515.73	843.32
chr22	24962878	24963430	553	*	8.24879	5.9943	9.0891	-2.92	1.41287e-17	1.8168e-15	63.82	63.67	415.98	673.25
chrX	68723390	68725079	1690	*	8.86999	9.6597	6.98779	2.55668	1.41584e-17	1.81958e-15	748.45	869.22	106.4	147.45
chr11	67415627	67416057	431	*	7.34364	8.17078	5.19696	2.81615	1.42244e-17	1.82512e-15	268.34	308	41.38	31.99
chr1	48513773	48514106	334	*	6.86426	7.75827	4.0448	3.42873	1.42272e-17	1.82512e-15	182.76	250.25	9.61	23.4
chr7	127087260	127087778	519	*	7.48319	8.32937	5.17751	2.96924	1.42395e-17	1.82512e-15	252.38	390.93	31.03	41.35
chr5	149172411	149173122	712	*	7.28576	8.12311	5.0563	2.89498	1.42397e-17	1.82512e-15	243.68	313.93	37.68	28.86
chr5	174327088	174327798	711	*	7.72658	5.30586	8.58515	-3.0737	1.4249e-17	1.82512e-15	40.61	38.5	299.24	468.86
chr5	150650119	150650540	422	*	7.69081	4.94384	8.57914	-3.36174	1.42498e-17	1.82512e-15	30.46	31.1	258.6	506.31
chr7	89747911	89749262	1352	*	9.02588	9.78865	7.30448	2.38948	1.43391e-17	1.83512e-15	880.44	888.47	164.03	152.13
chr1	43525812	43526269	458	*	7.55835	4.80259	8.44739	-3.37037	1.4344e-17	1.83512e-15	21.76	34.06	252.69	445.46
chr2	189717973	189718411	439	*	8.09586	5.8555	8.9345	-2.90668	1.442e-17	1.8438e-15	56.57	59.23	386.43	592.12
chr13	25320531	25321325	795	*	7.88381	8.7064	5.77245	2.78152	1.46332e-17	1.87e-15	411.94	423.5	67.98	41.35
chr16	26841713	26842694	982	*	6.78996	7.66435	4.20578	3.21671	1.46478e-17	1.87082e-15	213.22	192.5	23.64	13.26
chr8	580863	581415	553	*	9.77791	10.5896	7.74714	2.70518	1.47621e-17	1.88436e-15	1540.42	1541.5	156.64	273.05
chr7	117042110	117042607	498	*	7.60014	4.97606	8.47811	-3.25454	1.48861e-17	1.89911e-15	34.81	28.13	263.04	450.14
chr1	109731055	109731372	318	*	6.52608	7.41578	3.76212	3.37226	1.49196e-17	1.90232e-15	168.26	173.25	16.99	10.14
chr16	86601576	86602253	678	*	8.71002	9.51678	6.71423	2.67095	1.49427e-17	1.90419e-15	680.28	784.82	81.28	128.72
chr11	17553161	17553645	485	*	6.85981	7.71129	4.50609	3.0114	1.50778e-17	1.92033e-15	208.87	210.27	24.38	21.06
chr15	85684740	85685421	682	*	8.30403	5.99498	9.15058	-2.97092	1.51223e-17	1.92492e-15	60.92	66.64	418.94	717.72
chr19	41551064	41551379	316	*	6.12101	7.05261	2.68828	3.90963	1.52597e-17	1.94132e-15	120.39	145.12	6.65	6.24
chrX	72434060	72434931	872	*	6.88265	7.73102	4.55732	2.98642	1.5364e-17	1.95349e-15	216.12	208.79	22.9	24.18
chr2	226604760	226605357	598	*	7.04455	4.07703	7.94925	-3.54662	1.54351e-17	1.96143e-15	14.5	19.25	200.97	293.33
chr5	38447890	38448442	553	*	7.05456	4.13649	7.95582	-3.50492	1.56305e-17	1.98515e-15	17.41	17.77	202.45	294.11
chr5	171837835	171838326	492	*	8.73441	6.58711	9.56163	-2.81809	1.56957e-17	1.99231e-15	81.23	111.06	596.26	915.1
chr12	5018529	5019681	1153	*	8.73636	9.51838	6.90223	2.50726	1.58141e-17	2.00623e-15	744.1	722.62	102.7	136.52
chr2	95539814	95540272	459	*	7.45515	8.27424	5.37023	2.75749	1.59177e-17	2.01824e-15	343.77	275.43	41.38	41.35
chr12	64855332	64855916	585	*	8.42515	6.21195	9.26055	-2.88105	1.59366e-17	2.01951e-15	62.37	85.89	483.22	743.47
chr2	17719908	17720734	827	*	8.73303	9.51236	6.91529	2.49031	1.59869e-17	2.02475e-15	752.8	707.82	105.66	135.74
chr15	81238987	81239259	273	*	7.2103	4.4614	8.09879	-3.36388	1.61853e-17	2.04874e-15	17.41	26.65	226.09	322.19
chr6	10510781	10511150	370	*	7.26956	8.09036	5.17174	2.76978	1.62579e-17	2.05678e-15	275.59	269.5	36.2	35.89
chr15	93365932	93366166	235	*	6.2558	7.1673	3.18481	3.62822	1.62875e-17	2.05937e-15	131.99	155.48	9.61	8.58
chr9	5844707	5845310	604	*	7.96792	5.76098	8.80256	-2.87441	1.64722e-17	2.08156e-15	53.67	54.79	367.22	525.81
chr13	31415205	31415722	518	*	8.73783	6.47347	9.57928	-2.92924	1.66145e-17	2.09838e-15	69.62	108.1	584.44	945.52
chr5	132947803	132948522	720	*	7.5786	8.38455	5.58841	2.66345	1.66409e-17	2.10054e-15	327.81	340.58	50.98	45.25
chr10	120303438	120304064	627	*	7.35242	8.17063	5.27401	2.75061	1.67104e-17	2.10814e-15	271.24	305.04	39.16	38.23
chr1	15280658	15281133	476	*	7.30161	4.68124	8.17925	-3.25138	1.67929e-17	2.11737e-15	24.66	26.65	235.7	344.04
chr17	32640168	32640541	374	*	7.11219	4.19717	8.01324	-3.50253	1.70041e-17	2.1428e-15	15.96	20.73	204.67	312.05
chr2	106003601	106004127	527	*	6.89493	7.74755	4.53064	3.02065	1.7025e-17	2.14426e-15	194.37	235.44	24.38	21.84
chr2	227268054	227268616	563	*	7.71627	5.16349	8.58778	-3.19062	1.70599e-17	2.14745e-15	42.06	29.62	288.16	481.34
chr1	234275693	234276060	368	*	6.65351	7.53939	3.93676	3.33962	1.70892e-17	2.14995e-15	194.37	177.69	10.34	20.28
chr5	176239801	176240124	324	*	7.36886	8.2031	5.1652	2.87344	1.71466e-17	2.15598e-15	281.39	308	28.08	43.69
chr9	136754972	136755521	550	*	7.90783	8.70258	5.9931	2.58821	1.71584e-17	2.15627e-15	446.75	386.48	65.76	61.63
chr14	69727768	69728299	532	*	7.98826	8.7842	6.06567	2.59713	1.72371e-17	2.16495e-15	464.16	417.58	59.85	74.11
chr14	59948578	59948943	366	*	7.79577	5.48104	8.64296	-2.97503	1.72608e-17	2.16673e-15	47.87	41.46	323.62	475.88
chr19	15089853	15091062	1210	*	7.64011	8.44878	5.63085	2.68177	1.72992e-17	2.17035e-15	359.72	339.1	55.41	43.69
chr2	73162155	73162431	277	*	6.7258	7.59084	4.24069	3.12933	1.73506e-17	2.1756e-15	185.66	199.91	21.43	16.38
chr7	155302233	155302988	756	*	6.97579	7.8241	4.65107	2.98622	1.7374e-17	2.17732e-15	207.42	245.81	22.17	28.08
chr10	134930814	134931564	751	*	7.29678	8.15167	4.91127	3.0375	1.74879e-17	2.19039e-15	277.04	291.71	39.9	20.28
chr4	185085029	185085282	254	*	6.48915	7.37157	3.81363	3.29996	1.7602e-17	2.20347e-15	165.36	165.85	13.3	14.82
chr20	50112362	50113011	650	*	7.54693	5.01096	8.41686	-3.1764	1.76671e-17	2.21039e-15	31.91	32.58	263.04	420.49
chr15	88936966	88937673	708	*	6.89922	7.74694	4.57978	2.97995	1.76875e-17	2.21173e-15	203.07	226.56	23.64	24.18
chr10	46004982	46005285	304	*	6.07366	7.01922	2.31856	4.14967	1.7752e-17	2.21857e-15	127.64	131.79	2.96	7.02
chr15	98195839	98196483	645	*	6.68159	7.55848	4.06966	3.24649	1.78101e-17	2.22461e-15	169.71	207.31	13.3	20.28
chr7	130357944	130358319	376	*	7.97426	5.483	8.8399	-3.13657	1.80889e-17	2.25818e-15	42.06	47.39	325.1	591.34
chr10	104118569	104119172	604	*	8.33878	6.15067	9.17112	-2.85588	1.81967e-17	2.2704e-15	73.97	68.12	448.49	704.46
chr17	42415974	42416410	437	*	7.37828	8.19449	5.31475	2.73561	1.82799e-17	2.27952e-15	307.5	278.39	41.38	38.23
chr17	71794204	71794846	643	*	8.60748	9.41111	6.63331	2.64885	1.83625e-17	2.28856e-15	671.57	690.05	76.84	121.7
chr20	44872706	44873105	400	*	6.95744	7.80833	4.60923	3.00866	1.84356e-17	2.29641e-15	230.63	217.68	19.95	28.86
chr19	50836709	50837420	712	*	8.96195	9.76517	6.9906	2.64578	1.86224e-17	2.31841e-15	829.68	910.68	97.53	156.81
chr14	95330669	95331535	867	*	7.36865	8.20458	5.15102	2.88255	1.86472e-17	2.32022e-15	252.38	337.62	40.64	30.43
chr6	28785521	28785749	229	*	6.27081	7.19077	3.05898	3.73811	1.8666e-17	2.32129e-15	118.94	173.25	8.87	7.8
chr10	33529836	33530278	443	*	8.03246	5.72104	8.87929	-2.97184	1.87461e-17	2.32998e-15	53.67	51.83	359.83	581.98
chr7	1720643	1721121	479	*	8.09775	5.85399	8.9368	-2.90821	1.90755e-17	2.36961e-15	62.37	53.31	386.43	593.68
chr8	53258960	53259270	311	*	6.11621	7.04355	2.76868	3.84207	1.91527e-17	2.3779e-15	129.09	134.75	7.39	6.24
chr10	113987106	113987863	758	*	9.26678	7.25197	10.0762	-2.68781	1.92541e-17	2.38918e-15	150.85	154	843.05	1316.08
chr8	24961569	24962189	621	*	7.59348	4.94171	8.47387	-3.27675	1.97063e-17	2.44396e-15	34.81	26.65	258.6	452.48
chr21	40475621	40476013	393	*	8.14155	5.65594	9.00664	-3.1297	1.98852e-17	2.46479e-15	63.82	37.02	381.99	646.73
chr10	122738683	122739513	831	*	7.22698	8.05671	5.05988	2.83519	1.99503e-17	2.47119e-15	239.33	293.2	34.73	31.99
chr4	52972841	52973245	405	*	8.50986	6.37289	9.33576	-2.80699	1.99586e-17	2.47119e-15	75.43	90.33	509.08	783.25
chr21	37555298	37555979	682	*	7.3509	4.75896	8.226	-3.22431	2.00589e-17	2.48225e-15	30.46	23.69	243.09	355.74
chr1	15106716	15107236	521	*	8.00047	5.57366	8.85967	-3.07744	2.04262e-17	2.52633e-15	47.87	47.39	336.18	592.9
chr20	32998054	32998543	490	*	7.3465	4.50813	8.24195	-3.43742	2.05639e-17	2.54198e-15	18.86	26.65	221.66	383.83
chrX	68046199	68046436	238	*	6.28193	7.19568	3.17496	3.65062	2.07204e-17	2.55993e-15	142.15	151.04	11.82	6.24
chr2	211089362	211090294	933	*	9.13103	9.9206	7.24974	2.55458	2.08166e-17	2.57042e-15	922.51	1015.82	123.39	180.99
chr9	75602651	75603221	571	*	8.36749	5.94668	9.22607	-3.07265	2.09296e-17	2.58297e-15	49.32	74.04	429.28	768.43
chrX	12388465	12389154	690	*	8.40073	6.10738	9.24551	-2.95489	2.1093e-17	2.60171e-15	62.37	75.52	445.54	768.43
chr10	30350925	30351439	515	*	7.94189	5.59547	8.79259	-3.00363	2.11563e-17	2.6081e-15	49.32	47.39	337.66	549.21
chr11	114128420	114129013	594	*	7.72445	8.52472	5.77305	2.62486	2.12056e-17	2.61276e-15	394.53	342.06	53.2	56.17
chr2	99438882	99439948	1067	*	8.05458	8.86207	6.05362	2.67246	2.13405e-17	2.62795e-15	462.7	467.93	79.8	53.05
chr3	123668371	123668884	514	*	7.95776	5.6607	8.80296	-2.95816	2.13862e-17	2.63215e-15	47.87	53.31	348.74	544.53
chr3	10803341	10803658	318	*	6.60856	7.49562	3.87743	3.34171	2.14093e-17	2.63356e-15	159.55	201.39	18.47	10.92
chr2	56354617	56355704	1088	*	7.45951	8.30676	5.1443	2.97202	2.14716e-17	2.6398e-15	306.05	327.25	46.55	24.18
chr1	119310664	119311006	343	*	6.11668	7.04404	2.76868	3.84109	2.16027e-17	2.65447e-15	124.74	139.19	7.39	6.24
chr4	8689755	8690249	495	*	7.74523	8.54786	5.77788	2.63957	2.1634e-17	2.65688e-15	391.63	356.87	60.59	49.15
chr6	139401528	139402110	583	*	6.70252	7.57584	4.13009	3.20911	2.16678e-17	2.65853e-15	163.9	217.68	15.52	19.5
chr2	134699140	134699608	469	*	7.88023	5.45842	8.73891	-3.07265	2.16709e-17	2.65853e-15	43.51	44.42	316.97	537.51
chr20	21558172	21558637	466	*	6.48015	7.36577	3.7665	3.32822	2.19324e-17	2.68916e-15	158.1	171.77	15.52	11.7
chrX	139585809	139586893	1085	*	8.47562	9.27875	6.50484	2.64475	2.2139e-17	2.71303e-15	572.94	669.31	72.41	109.22
chr1	48517940	48518646	707	*	7.11017	7.94393	4.91037	2.86778	2.24413e-17	2.74858e-15	242.23	250.25	26.6	33.55
chr4	8887574	8887912	339	*	6.41634	7.30614	3.65107	3.37632	2.24595e-17	2.74933e-15	159.55	156.96	11.08	14.04
chr19	10531620	10531882	263	*	7.49521	8.30241	5.49629	2.67152	2.25833e-17	2.763e-15	326.36	305.04	45.81	44.47
chr2	237872946	237873449	504	*	7.83816	5.45593	8.6927	-3.0355	2.27906e-17	2.78685e-15	50.77	37.02	324.36	503.19
chr6	15969402	15969913	512	*	7.3274	4.63811	8.21099	-3.3086	2.30186e-17	2.81322e-15	26.11	23.69	228.31	364.32
chr11	124471884	124472508	625	*	8.47569	9.26662	6.58568	2.56334	2.31957e-17	2.83333e-15	645.47	586.39	80.54	111.56
chr7	51254165	51254614	450	*	7.16032	8.0336	4.58835	3.20291	2.3272e-17	2.84105e-15	219.02	305.04	32.51	15.6
chr2	199085385	199085993	609	*	7.01789	7.8661	4.69404	2.98385	2.32839e-17	2.84105e-15	204.52	262.1	22.9	28.86
chr22	27688748	27689249	502	*	6.63386	7.51099	4.01932	3.24091	2.33645e-17	2.84936e-15	187.11	177.69	19.95	12.48
chr14	51915340	51916270	931	*	8.8183	6.69034	9.64305	-2.79728	2.34095e-17	2.8533e-15	107.34	99.21	603.65	995.45
chr1	75602851	75603339	489	*	7.72266	8.52396	5.76436	2.63155	2.34896e-17	2.86153e-15	342.31	393.89	50.98	57.73
chr12	104575924	104576366	443	*	8.15903	5.97814	8.99048	-2.84817	2.35871e-17	2.87187e-15	60.92	65.15	405.64	611.62
chr1	75118220	75119026	807	*	8.53737	9.32108	6.69289	2.51642	2.36536e-17	2.87841e-15	574.39	704.85	94.57	112.34
chr6	150393415	150393661	247	*	7.79711	8.5949	5.8623	2.60818	2.38849e-17	2.90501e-15	409.04	364.27	53.94	62.41
chr3	171678697	171679203	507	*	7.74102	8.56454	5.62253	2.79027	2.39187e-17	2.90756e-15	400.33	356.87	37.68	60.85
chr1	37074900	37075183	284	*	6.93053	7.77657	4.62609	2.96488	2.40413e-17	2.9209e-15	201.62	236.93	23.64	25.74
chr16	22824516	22826261	1746	*	9.63866	10.3916	7.97086	2.33165	2.4065e-17	2.92221e-15	1318.49	1368.25	249	252.76
chr5	65460240	65460656	417	*	7.34535	4.59818	8.2337	-3.35912	2.42177e-17	2.93918e-15	20.31	28.13	227.57	374.46
chr4	4657659	4658008	350	*	6.85866	3.2554	7.79805	-4.03153	2.43278e-17	2.95097e-15	7.25	11.85	173.63	271.49
chr1	58057490	58058056	567	*	8.11184	5.80181	8.95851	-2.97007	2.44299e-17	2.96176e-15	46.42	65.15	385.69	609.28
chr15	25093174	25093612	439	*	6.09726	7.02793	2.68365	3.88793	2.44726e-17	2.96535e-15	123.29	137.71	7.39	5.46
chr19	6767174	6768074	901	*	8.08243	8.87977	6.15064	2.60457	2.46107e-17	2.97925e-15	409.04	533.08	67.98	74.11
chr18	57597161	57597584	424	*	7.194	8.01896	5.06433	2.79979	2.46135e-17	2.97925e-15	259.64	259.14	31.03	35.89
chr16	82050491	82051134	644	*	9.03026	6.93586	9.85061	-2.76485	2.47856e-17	2.99848e-15	116.04	128.83	698.97	1147.58
chr16	86899318	86900288	971	*	9.32701	10.0946	7.5781	2.41744	2.4851e-17	3.00478e-15	1076.26	1110.59	169.2	212.98
chr6	8140164	8140519	356	*	6.34873	7.26264	3.23912	3.65372	2.50521e-17	3.026e-15	184.21	122.91	11.08	7.8
chr1	232925445	232925813	369	*	7.01826	3.72641	7.94265	-3.8004	2.50531e-17	3.026e-15	8.7	17.77	185.46	306.59
chr3	65334021	65334731	711	*	8.08284	5.59818	8.94783	-3.12916	2.52958e-17	3.05368e-15	40.61	56.27	349.48	638.15
chr5	141614505	141615071	567	*	7.16761	7.99993	4.97958	2.85528	2.55082e-17	3.0768e-15	230.63	281.35	29.55	33.55
chr17	31285168	31285883	716	*	7.50024	5.13587	8.35288	-3.01913	2.55144e-17	3.0768e-15	36.26	34.06	277.07	376.8
chr15	65940563	65940934	372	*	7.15901	4.19479	8.06349	-3.53852	2.55456e-17	3.07893e-15	18.86	17.77	198.02	337.02
chr10	44187490	44187871	382	*	7.04413	4.01096	7.95321	-3.59459	2.58574e-17	3.11485e-15	15.96	16.29	190.63	305.03
chr8	81165672	81165961	290	*	6.20817	7.12044	3.12498	3.63475	2.59028e-17	3.11867e-15	146.5	131.79	8.87	8.58
chr11	17743625	17743884	260	*	6.87456	7.72218	4.55605	2.97693	2.6229e-17	3.15627e-15	198.72	223.6	23.64	23.4
chr5	1878380	1878888	509	*	7.06515	7.90362	4.82618	2.90143	2.62837e-17	3.16116e-15	253.83	225.08	31.77	24.96
chr15	91608842	91609153	312	*	6.45594	7.34648	3.68133	3.3778	2.62983e-17	3.16124e-15	155.2	170.29	15.52	10.14
chr7	103916387	103916700	314	*	6.38857	7.28015	3.60067	3.39168	2.6521e-17	3.18633e-15	146.5	164.37	12.56	11.7
chr2	124782547	124783158	612	*	7.09764	7.94172	4.81045	2.94737	2.66766e-17	3.20333e-15	207.42	284.31	28.82	27.3
chr11	132090303	132090848	546	*	7.9063	5.45543	8.76794	-3.09684	2.71205e-17	3.2549e-15	52.22	35.54	327.32	544.53
chr1	209798419	209798837	419	*	7.18027	8.02124	4.92014	2.9212	2.72978e-17	3.27446e-15	220.47	299.12	33.25	27.3
chr5	7742226	7742818	593	*	6.77248	7.63965	4.26552	3.14501	2.74666e-17	3.29296e-15	188.56	210.27	23.64	14.82
chr2	54246367	54246739	373	*	6.97451	3.79395	7.89267	-3.70845	2.74985e-17	3.29505e-15	18.86	8.88	192.11	283.19
chr19	48593353	48594024	672	*	8.08633	5.82005	8.92801	-2.9285	2.77074e-17	3.31831e-15	49.32	63.67	381.25	592.9
chr7	24323294	24324452	1159	*	7.72796	8.54027	5.69283	2.70502	2.77445e-17	3.32101e-15	366.97	377.6	61.33	42.13
chr3	38703990	38704477	488	*	7.18056	8.01619	4.96544	2.88155	2.78727e-17	3.3346e-15	236.43	281.35	26.6	35.89
chr1	66499481	66499777	297	*	6.30075	7.20384	3.35656	3.52155	2.81522e-17	3.36626e-15	133.44	161.41	10.34	10.14
chr19	16181184	16181764	581	*	7.45825	8.26549	5.45907	2.67085	2.82473e-17	3.37585e-15	310.4	305.04	45.07	42.91
chr17	4753668	4754024	357	*	6.59435	7.46423	4.05898	3.17231	2.85092e-17	3.40536e-15	176.96	176.21	17.73	15.6
chr1	179852942	179853153	212	*	7.19119	8.02048	5.02756	2.83058	2.85866e-17	3.41281e-15	233.53	285.79	33.25	31.99
chr1	236867350	236867822	473	*	6.50295	7.38389	3.84485	3.27878	2.88054e-17	3.43711e-15	171.16	162.89	16.26	12.48
chr20	5041962	5042252	291	*	6.92695	7.77069	4.64276	2.94349	2.89163e-17	3.44854e-15	216.12	220.64	27.34	22.62
chrX	107978861	107980303	1443	*	7.86327	8.65454	5.9711	2.56449	2.89475e-17	3.45044e-15	406.14	399.81	58.37	67.09
chr11	8730497	8731257	761	*	9.57041	7.48628	10.3894	-2.75396	2.90591e-17	3.46193e-15	200.17	158.44	1011.51	1671.04
chr12	88600432	88601045	614	*	7.03364	3.86598	7.95104	-3.69692	2.93436e-17	3.49398e-15	21.76	7.4	203.93	290.99
chr16	18970432	18970902	471	*	6.9893	7.83302	4.70538	2.94261	2.96337e-17	3.52667e-15	214.67	241.37	29.55	22.62
chr4	74763039	74763524	486	*	7.07976	4.00824	7.9913	-3.62286	2.97414e-17	3.53764e-15	18.86	13.33	190.63	318.29
chr5	149487424	149488071	648	*	9.75598	7.85606	10.5485	-2.57171	2.98029e-17	3.54233e-15	217.57	245.81	1223.56	1771.68
chr1	223209520	223209798	279	*	6.34667	7.24609	3.45433	3.4762	2.98121e-17	3.54233e-15	139.25	164.37	12.56	9.36
chr12	54920875	54921263	389	*	6.7948	7.66425	4.26397	3.16544	2.99042e-17	3.55142e-15	214.67	191.02	24.38	14.04
chr11	111109879	111110405	527	*	7.27891	4.55339	8.16551	-3.33902	2.99223e-17	3.5517e-15	20.31	26.65	222.4	351.84
chr2	47024020	47024366	347	*	7.32379	4.76219	8.19611	-3.19643	3.00422e-17	3.56407e-15	24.66	29.62	239.39	347.16
chr21	36738630	36739358	729	*	7.54223	5.04437	8.40851	-3.13968	3.0072e-17	3.56574e-15	30.46	35.54	263.78	415.81
chr6	26311185	26312215	1031	*	9.50789	10.3218	7.46132	2.7181	3.05048e-17	3.61517e-15	1160.39	1399.34	128.56	223.9
chr14	104789031	104789652	622	*	8.26727	9.04849	6.43807	2.50016	3.05802e-17	3.62032e-15	555.54	503.47	79.8	93.62
chr1	160989964	160991391	1428	*	9.55638	10.3263	7.79403	2.43084	3.05802e-17	3.62032e-15	1196.65	1371.21	195.8	248.08
chr6	158342843	158343401	559	*	7.98716	5.79788	8.81963	-2.85442	3.08571e-17	3.6512e-15	60.92	50.35	372.39	531.27
chr20	19541539	19542613	1075	*	9.00493	7.01922	9.81024	-2.65734	3.09344e-17	3.65844e-15	127.64	131.79	717.44	1078.14
chr17	32254452	32255308	857	*	7.33424	8.14791	5.28924	2.71597	3.10846e-17	3.67259e-15	277.04	290.23	38.42	39.79
chr1	65487549	65488290	742	*	7.24389	8.06348	5.15521	2.75797	3.10865e-17	3.67259e-15	261.09	273.95	36.94	34.33
chr20	60734986	60735331	346	*	7.49225	8.30062	5.4851	2.67861	3.11686e-17	3.68037e-15	293	337.62	44.33	45.25
chr2	75373495	75374539	1045	*	8.45329	6.1924	9.29434	-2.92171	3.15227e-17	3.7202e-15	87.03	59.23	479.52	776.23
chr8	98123469	98124041	573	*	7.04615	4.07054	7.9514	-3.54425	3.15387e-17	3.7202e-15	21.76	11.85	201.71	293.33
chr7	79876458	79876910	453	*	8.0525	5.90871	8.87928	-2.81119	3.20369e-17	3.77693e-15	60.92	59.23	387.9	553.89
chr17	37370177	37370445	269	*	7.75404	8.54897	5.83815	2.58702	3.20529e-17	3.77693e-15	364.07	385	60.59	53.83
chr13	22211314	22211867	554	*	6.96694	7.81309	4.66159	2.96181	3.2339e-17	3.80823e-15	230.63	219.16	29.55	21.06
chr1	77342609	77343069	461	*	7.16673	4.35782	8.05993	-3.40784	3.23521e-17	3.80823e-15	21.76	19.25	207.62	326.1
chr1	202336450	202336863	414	*	8.4684	6.26336	9.3028	-2.86907	3.26732e-17	3.84403e-15	88.48	65.15	486.91	776.23
chr6	166075111	166077705	2595	*	9.49983	10.2562	7.81375	2.35024	3.29045e-17	3.86923e-15	1147.33	1298.65	226.09	223.9
chr15	30260350	30261462	1113	*	9.26955	10.0627	7.36543	2.57625	3.29783e-17	3.87591e-15	1031.3	1107.63	129.3	200.49
chr12	70464102	70464780	679	*	8.50267	6.28198	9.33897	-2.88494	3.30079e-17	3.87738e-15	63.82	91.81	499.47	795.74
chr6	52020868	52021421	554	*	7.09918	7.92978	4.92505	2.84075	3.30988e-17	3.88605e-15	259.64	228.04	29.55	31.21
chr19	15568109	15568593	485	*	7.84234	8.64896	5.84748	2.66763	3.32966e-17	3.90724e-15	413.39	389.45	47.29	67.87
chr5	160975648	160975969	322	*	6.3849	7.28743	3.44889	3.50897	3.36544e-17	3.94719e-15	142.15	170.29	14.04	7.8
chr8	87110863	87111234	372	*	6.72538	7.59895	4.15018	3.20535	3.37017e-17	3.9507e-15	223.37	164.37	20.69	14.82
chr2	20630696	20631111	416	*	8.25731	9.03796	6.43157	2.4962	3.37883e-17	3.95748e-15	498.97	552.33	79.8	92.84
chr2	218135120	218135884	765	*	7.33838	4.83731	8.20497	-3.14168	3.37945e-17	3.95748e-15	27.56	29.62	244.56	345.6
chr13	93876768	93877127	360	*	7.66285	5.33207	8.51183	-2.98665	3.40855e-17	3.9895e-15	42.06	38.5	296.29	433.75
chr10	102495102	102495697	596	*	7.44679	8.26563	5.36373	2.75091	3.45436e-17	4.04021e-15	307.5	308	48.03	34.33
chr1	153205017	153205430	414	*	6.67229	7.53962	4.16354	3.15101	3.45544e-17	4.04021e-15	191.46	180.66	14.78	21.06
chr7	107726966	107727779	814	*	8.05291	5.83808	8.8885	-2.87892	3.45762e-17	4.04067e-15	52.22	62.19	377.56	570.28
chr1	94582095	94582484	390	*	8.34941	6.20959	9.17568	-2.8071	3.49089e-17	4.07746e-15	73.97	74.04	452.92	703.68
chr1	56189908	56190661	754	*	8.00141	5.78094	8.83768	-2.88398	3.53994e-17	4.13262e-15	52.22	57.75	364.26	550.77
chr4	57687478	57688344	867	*	7.69069	8.49585	5.70595	2.65502	3.55518e-17	4.14828e-15	384.38	337.62	58.37	46.03
chr12	29191824	29192361	538	*	9.2689	7.20841	10.0847	-2.73017	3.56229e-17	4.15443e-15	159.55	136.23	825.31	1346.51
chr7	111287927	111288393	467	*	8.10559	5.96074	8.9325	-2.81179	3.5804e-17	4.17341e-15	62.37	62.19	396.77	580.42
chr2	219037663	219038232	570	*	6.58716	7.47579	3.83654	3.35359	3.59062e-17	4.18318e-15	182.76	173.25	19.21	9.36
chr1	160807288	160808064	777	*	7.36275	8.19464	5.17825	2.84761	3.62346e-17	4.21926e-15	304.6	281.35	44.33	28.08
chr22	27364835	27365213	379	*	6.72899	7.62016	3.94626	3.3813	3.62618e-17	4.22027e-15	232.08	161.41	20.69	10.14
chr10	88199269	88199701	433	*	8.071	5.81696	8.91125	-2.91488	3.63341e-17	4.22651e-15	60.92	51.83	373.13	589.78
chr12	4381079	4382202	1124	*	8.70405	9.48077	6.90198	2.47183	3.64302e-17	4.23551e-15	707.84	721.14	103.44	135.74
chr2	175662476	175663058	583	*	8.28248	5.9967	9.12641	-2.94547	3.64829e-17	4.23947e-15	53.67	74.04	421.89	695.88
chr19	35047318	35047820	503	*	6.67533	7.54009	4.19297	3.12665	3.69296e-17	4.28918e-15	185.66	186.58	15.52	21.06
chr12	29078687	29079472	786	*	9.03241	6.94473	9.85186	-2.75669	3.77932e-17	4.38568e-15	114.59	131.79	698.23	1149.92
chr4	23374898	23375461	564	*	7.01982	7.86151	4.75342	2.92714	3.77991e-17	4.38568e-15	204.52	260.62	25.86	28.08
chr9	119104334	119104727	394	*	7.40123	4.59275	8.2944	-3.40551	3.7864e-17	4.39097e-15	29.01	19.25	225.35	402.55
chr17	77898084	77898517	434	*	7.45871	8.27924	5.36301	2.76265	3.79436e-17	4.39795e-15	311.85	309.48	48.77	33.55
chr2	177789759	177790261	503	*	6.83385	7.69097	4.42704	3.0535	3.81243e-17	4.41663e-15	205.97	207.31	25.86	17.16
chr2	5833219	5833946	728	*	8.2347	9.01619	6.40384	2.5007	3.84677e-17	4.45414e-15	472.86	562.7	82.75	86.59
chr10	43724211	43725535	1325	*	9.00575	9.7757	7.24348	2.43028	3.85732e-17	4.46408e-15	857.24	895.88	133	170.07
chr15	25017866	25018559	694	*	8.23808	9.05838	6.144	2.76427	3.871e-17	4.47763e-15	490.26	576.03	51.72	89.72
chr1	210854401	210854940	540	*	7.43747	4.79631	8.31694	-3.26264	3.88402e-17	4.49039e-15	33.36	22.21	243.83	393.97
chr4	154685684	154686139	456	*	8.16415	5.87084	9.00894	-2.95087	3.91839e-17	4.52783e-15	68.17	48.87	394.55	635.81
chr20	43438818	43439590	773	*	7.72436	8.52839	5.74739	2.64913	3.94523e-17	4.55652e-15	375.68	362.79	45.81	61.63
chr10	102895764	102896020	257	*	6.45919	7.33923	3.81151	3.26964	3.9475e-17	4.55682e-15	162.45	161.41	14.04	14.04
chr3	123166673	123167305	633	*	7.60021	8.40829	5.5952	2.67673	3.95343e-17	4.56135e-15	364.07	315.41	42.85	53.83
chr11	32910405	32910712	308	*	6.77638	3.25311	7.71224	-3.96638	3.97462e-17	4.58346e-15	8.7	10.37	172.89	246.52
chr10	106400842	106401739	898	*	7.97549	8.75887	6.13302	2.51227	4.02387e-17	4.6379e-15	419.19	447.2	70.93	69.43
chr19	18140461	18141081	621	*	8.61533	9.38288	6.86687	2.41565	4.03863e-17	4.65255e-15	658.52	676.72	108.61	124.82
chr20	55840702	55842050	1349	*	8.53406	9.30524	6.76464	2.43746	4.04651e-17	4.65926e-15	604.85	660.43	101.22	116.24
chr12	108323169	108323744	576	*	7.19261	8.01922	5.05011	2.81064	4.06498e-17	4.67815e-15	255.29	263.58	28.82	37.45
chr11	33919567	33919910	344	*	6.62788	7.49416	4.13009	3.13924	4.14292e-17	4.76543e-15	176.96	183.62	15.52	19.5
chr1	171757845	171758251	407	*	7.97723	5.59728	8.83153	-3.03144	4.15228e-17	4.77377e-15	43.51	53.31	336.18	574.96
chr8	61835237	61835949	713	*	7.57509	8.38115	5.58413	2.66264	4.18948e-17	4.8141e-15	332.16	334.66	42.12	53.83
chr1	172920870	172921251	382	*	7.73891	5.33261	8.59599	-3.05487	4.19338e-17	4.81614e-15	40.61	39.98	293.33	480.56
chr14	37236743	37237378	636	*	6.98512	7.85059	4.49557	3.12608	4.2067e-17	4.82757e-15	230.63	231	30.29	14.82
chr14	31737512	31737826	315	*	7.06301	4.07444	7.96913	-3.55401	4.20758e-17	4.82757e-15	17.41	16.29	189.89	311.27
chr8	85542432	85542783	352	*	6.59874	7.46903	4.05898	3.17396	4.2177e-17	4.83673e-15	191.46	162.89	17.73	15.6
chr1	230022741	230023531	791	*	7.27954	8.10112	5.17586	2.77282	4.26663e-17	4.89036e-15	293	256.18	32.51	39.79
chr19	51415991	51416338	348	*	6.82298	7.68516	4.36669	3.10356	4.288e-17	4.91237e-15	214.67	196.94	15.52	25.74
chr19	50969210	50969546	337	*	7.10482	7.93443	4.93861	2.83071	4.30064e-17	4.92438e-15	255.29	233.96	33.25	28.08
chr8	69774191	69774839	649	*	8.00089	5.73992	8.84195	-2.9205	4.31554e-17	4.93894e-15	58.02	48.87	357.61	560.14
chr8	121983085	121983640	556	*	9.38596	7.35115	10.1982	-2.70433	4.32933e-17	4.95222e-15	175.51	151.04	896.24	1453.39
chr12	115498423	115499319	897	*	8.3583	6.07736	9.20167	-2.94006	4.37791e-17	5.00528e-15	56.57	78.48	439.63	738.01
chr6	44129143	44130078	936	*	9.16976	9.94891	7.35315	2.48614	4.38341e-17	5.00903e-15	926.86	1049.88	137.43	189.57
chr19	34489253	34489585	333	*	6.19234	7.1077	3.05898	3.66841	4.39293e-17	5.01738e-15	121.84	154	8.87	7.8
chr14	89461564	89462503	940	*	9.74871	7.67197	10.5667	-2.74547	4.46143e-17	5.09306e-15	181.31	226.56	1127.51	1905.86
chr4	170504673	170505183	511	*	7.58832	5.13525	8.45018	-3.09638	4.50461e-17	5.13976e-15	37.71	32.58	270.42	429.07
chr8	4851022	4852618	1597	*	8.11002	8.9094	6.1647	2.61464	4.55323e-17	5.19263e-15	465.61	496.06	84.97	58.51
chr12	113573171	113573860	690	*	7.28172	8.12115	5.03476	2.90503	4.56204e-17	5.20006e-15	279.94	276.91	41.38	24.18
chr5	128988461	128989157	697	*	6.75781	7.61784	4.32288	3.07812	4.57284e-17	5.20976e-15	191.46	201.39	23.64	16.38
chr14	100452722	100453150	429	*	7.39907	4.97883	8.25759	-3.06756	4.59026e-17	5.22697e-15	29.01	34.06	257.13	354.96
chr15	94837658	94838175	518	*	7.75708	5.48251	8.59972	-2.93333	4.65518e-17	5.29824e-15	43.51	45.9	313.28	462.62
chr15	81140675	81140953	279	*	7.25966	4.46437	8.15182	-3.39665	4.6691e-17	5.31142e-15	13.05	31.1	235.7	333.12
chr1	46954199	46954809	611	*	8.20689	8.98559	6.39297	2.48318	4.69351e-17	5.33651e-15	520.72	493.1	77.58	90.5
chr2	23300443	23300950	508	*	6.95374	7.79759	4.66862	2.94353	4.6992e-17	5.3403e-15	248.03	196.94	25.12	25.74
chr18	10113254	10114072	819	*	7.68105	5.24852	8.54083	-3.07683	4.79372e-17	5.44498e-15	46.42	29.62	296.29	448.58
chr3	186478164	186478634	471	*	6.53209	7.40925	3.91719	3.23724	4.80812e-17	5.45861e-15	171.16	168.81	17.73	12.48
chr15	81157195	81157489	295	*	7.43234	4.97744	8.29438	-3.09796	4.81167e-17	5.45991e-15	31.91	31.1	253.43	374.46
[truncated: 224,832+ more rows]

## Sheet: ARPE_HCMV_vs_UI_deseq2
seqnames	start	end	width	strand	Conc	Conc_HCMV	Conc_UI	Log2FoldChange	p.value	FDR	ARPE_HCMV_Rep1	ARPE_HCMV_Rep2	ARPE_UI_Rep1	ARPE_UI_Rep2
chr1	228122356	228123196	841	*	10.8429	11.6954	8.47982	3.20143	0	0	3222.23	3410.57	345.86	368.16
chr16	33293702	33294805	1104	*	10.8217	11.7788	6.72827	5.04917	0	0	3534.55	3493.05	98.16	113.89
chr16	3221991	3222726	736	*	9.89487	10.8232	6.52799	4.27146	5.83847e-267	3.6485e-262	1761.08	1862.48	98.93	85.64
chr12	132970437	132971120	684	*	9.61994	10.5871	5.14615	5.42448	4.32394e-209	2.02655e-204	1491.42	1585.14	33.74	37.08
chr5	57746324	57748884	2561	*	10.891	9.64807	11.5487	-1.88535	2.28788e-153	8.57826e-149	741.58	863.1	2980.85	3010.59
chr15	20545650	20547832	2183	*	9.35506	10.193	7.12072	3.03451	1.08966e-146	3.40469e-142	1188.73	1152.4	132.67	145.67
chr8	67080033	67080997	965	*	10.7311	9.48899	11.3885	-1.88368	3.89533e-143	1.04324e-138	667.29	769.86	2690.2	2671.57
chr16	90060872	90062772	1901	*	9.31973	10.1576	7.08573	3.03527	7.96776e-141	1.86716e-136	1139.2	1145.22	124.23	147.44
chr14	69251283	69254210	2928	*	12.2432	11.5817	12.695	-1.10963	9.31545e-136	1.94043e-131	3036.49	3093.78	6546.06	6716
chr3	50208012	50208569	558	*	9.72656	10.4759	8.0782	2.37419	2.66092e-135	4.98848e-131	1400.61	1447.67	273.01	267.51
chr1	181998474	181999431	958	*	10.3828	11.0259	9.19296	1.82079	1.25914e-132	2.14595e-128	2063.77	2106.35	590.5	580.05
chr1	147736883	147737613	731	*	9.42187	10.2241	7.45743	2.73613	6.32471e-132	9.88089e-128	1203.87	1188.26	162.58	188.93
chr5	180648630	180649846	1217	*	12.0028	12.4615	11.3263	1.13244	6.63755e-130	9.57196e-126	5541.91	5738.08	2539.13	2596.53
chr16	71459990	71461144	1155	*	10.9602	11.5692	9.88584	1.67285	5.39976e-121	7.23074e-117	2841.12	3236.04	979.3	912.89
chr19	2059552	2060256	705	*	10.8575	11.4278	9.90064	1.52029	2.01142e-118	2.51389e-114	2662.26	2847.52	937.89	973.81
chr6	26322852	26323641	790	*	9.95898	10.6351	8.64468	1.97522	6.79132e-112	7.95739e-108	1538.2	1642.52	387.27	413.18
chr3	139477480	139478553	1074	*	10.8923	9.98073	11.4465	-1.45628	1.80587e-109	1.99147e-105	979.6	1041.22	2811.37	2770.45
chr4	1330943	1331758	816	*	9.28658	10.0725	7.42807	2.60576	6.66463e-109	6.94129e-105	1016.75	1136.86	180.22	164.21
chr3	72387487	72388828	1342	*	11.3151	11.8459	10.4661	1.37439	7.23783e-109	7.14152e-105	3479.52	3882.76	1392.65	1436.43
chr3	52004687	52005297	611	*	10.207	8.95714	10.8665	-1.89156	1.05448e-108	9.88428e-105	478.79	515.23	1924.86	1809
chr6	28715417	28715971	555	*	9.39077	10.1359	7.76433	2.34505	2.3096e-105	2.06184e-101	1115.81	1134.47	207.06	227.78
chr2	218556437	218557527	1091	*	10.5965	9.50383	11.211	-1.69877	3.14659e-105	2.68135e-101	789.74	662.27	2368.88	2372.28
chr11	134034358	134035306	949	*	8.50794	9.45872	4.61004	4.82252	2.31231e-102	1.88475e-98	649.4	757.9	21.47	27.37
chr3	20357611	20358293	683	*	9.28968	7.38865	10.0823	-2.64593	1.53351e-98	1.19788e-94	158.22	176.92	1045.25	1123.01
chr3	5094756	5095625	870	*	10.7123	9.80427	11.2652	-1.45103	2.56044e-98	1.92004e-94	873.66	914.51	2494.65	2427.9
chr2	43149922	43150691	770	*	10.8729	10.0006	11.4127	-1.40463	3.69352e-98	2.6632e-94	1029.13	1019.7	2808.3	2644.2
chr8	100739818	100740607	790	*	9.43317	7.73844	10.1911	-2.412	1.79364e-96	1.2454e-92	193.99	233.11	1165.65	1172.45
chr3	70775188	70775971	784	*	9.91043	8.55049	10.5979	-2.01974	5.97043e-96	3.99746e-92	339.83	410.03	1513.05	1586.52
chr12	70291295	70292319	1025	*	10.9191	10.0986	11.4389	-1.33193	6.6097e-96	4.27287e-92	1070.41	1122.51	2795.27	2757.21
chr15	101406928	101408185	1258	*	9.60071	8.10253	10.3197	-2.19369	1.18967e-95	7.43434e-92	290.3	259.41	1295.26	1260.74
chr7	118433996	118435061	1066	*	9.56792	8.0395	10.2933	-2.22867	2.54653e-95	1.54001e-91	275.17	251.04	1286.05	1223.66
chr7	55083849	55084662	814	*	9.70159	8.29426	10.4002	-2.08019	1.43777e-94	8.4232e-91	302.69	325.16	1381.15	1321.66
chr7	45949318	45951740	2423	*	8.99947	6.7548	9.83863	-3.02582	3.67221e-94	2.08617e-90	115.57	100.42	950.16	881.11
chr15	79433226	79434356	1131	*	9.56234	8.01165	10.2923	-2.24901	9.42248e-94	5.19545e-90	253.16	263	1197.86	1310.18
chr10	1540969	1542210	1242	*	8.56993	9.54636	3.62236	5.86235	1.34484e-93	7.2034e-90	774.6	720.85	12.27	12.36
chr3	123562496	123563289	794	*	9.34414	7.63354	10.105	-2.43018	1.13602e-92	5.91588e-89	184.36	212.79	1121.94	1080.63
chr3	189544791	189545767	977	*	9.9206	8.63182	10.5903	-1.93627	5.6048e-92	2.83985e-88	379.73	413.62	1608.91	1474.4
chr13	38105029	38105722	694	*	9.2996	7.57774	10.0625	-2.44271	9.92282e-92	4.8954e-88	178.86	203.22	1072.09	1066.51
chr14	95042007	95042848	842	*	10.1364	9.04969	10.7492	-1.6865	4.89515e-90	2.35309e-86	543.46	516.43	1745.41	1696.88
chr10	116266866	116267868	1003	*	9.93441	8.67772	10.5957	-1.89518	1.02587e-89	4.80804e-86	383.86	435.14	1602.01	1492.94
chr11	119186080	119188060	1981	*	10.5845	11.1239	9.71303	1.40089	1.09817e-89	5.02138e-86	2202.73	2260.56	868.1	810.48
chr15	39889752	39891997	2246	*	9.93804	8.65133	10.6072	-1.9287	3.77422e-88	1.68467e-84	361.85	442.31	1514.58	1605.06
chr3	88762160	88763279	1120	*	10.7885	9.92061	11.3265	-1.39392	1.16602e-87	5.08363e-84	906.68	1031.66	2575.17	2561.21
chr16	56713748	56714146	399	*	8.51979	9.3734	6.14641	3.14368	4.13149e-86	1.76032e-82	643.9	682.59	78.99	62.68
chr10	29328428	29329419	992	*	10.2728	9.23142	10.8713	-1.62924	5.73769e-86	2.39035e-82	643.9	558.27	1848.17	1898.17
chr6	7787184	7787962	779	*	10.0102	8.90375	10.6289	-1.70771	1.18975e-85	4.84879e-82	467.79	490.13	1569.03	1598
chr20	8912739	8913777	1039	*	10.3641	9.42005	10.9299	-1.4976	1.95947e-85	7.81589e-82	675.54	694.55	1929.46	1972.33
chr2	30523152	30524397	1246	*	10.7313	9.87414	11.2653	-1.38468	2.86223e-85	1.11789e-81	985.11	891.79	2516.12	2406.71
chr16	3241372	3242181	810	*	9.57477	10.2336	8.32745	1.88487	3.57185e-85	1.36657e-81	1214.87	1193.04	322.86	319.6
chr3	186904353	186905306	954	*	11.043	10.3141	11.525	-1.20298	4.87973e-84	1.82962e-80	1230.01	1316.17	2942.51	2951.44
chr1	107920829	107922252	1424	*	10.4276	9.53511	10.9749	-1.42998	1.31842e-82	4.84639e-79	749.84	734	2011.52	2013.83
chr1	2186806	2187867	1062	*	10.2678	10.8341	9.32215	1.49843	1.3694e-82	4.937e-79	1816.12	1834.99	671.02	609.18
chr8	77805441	77806801	1361	*	9.77665	8.57881	10.422	-1.82473	2.55183e-82	9.02634e-79	389.36	375.37	1390.35	1353.44
chr8	11499318	11500650	1333	*	10.9127	10.1791	11.3968	-1.2108	3.2947e-82	1.14382e-78	1154.34	1164.35	2690.97	2701.59
chr8	127386849	127388192	1344	*	11.5874	11.0082	11.9995	-0.987763	5.06458e-82	1.7263e-78	2069.27	2050.17	4104.33	4085.05
chr6	169473342	169473892	551	*	10.2226	9.09963	10.8463	-1.72663	1.39876e-80	4.68265e-77	509.06	588.15	1952.47	1729.55
chr6	27560171	27560808	638	*	9.23649	9.9356	7.82717	2.07934	3.16478e-80	1.04089e-76	969.97	988.62	230.83	223.37
chr2	38947589	38948445	857	*	10.8045	9.98606	11.3235	-1.3316	5.03545e-80	1.6276e-76	1073.16	955.15	2623.49	2502.06
chr3	106064149	106064957	809	*	9.91869	8.80387	10.54	-1.71971	8.63134e-79	2.7426e-75	462.28	431.55	1443.26	1534.43
chr11	59324424	59325316	893	*	10.34	10.8702	9.49296	1.36736	1.53564e-77	4.79816e-74	1891.79	1851.73	716.26	724.84
chr1	176534912	176536034	1123	*	10.0528	8.98061	10.6611	-1.66683	1.88264e-77	5.78594e-74	539.33	471	1569.8	1668.63
chr10	116264578	116265515	938	*	10.058	9.03165	10.6517	-1.6035	9.41592e-77	2.84713e-73	515.94	530.77	1556.76	1660.68
chr10	113987085	113987816	732	*	10.4085	9.50766	10.9588	-1.43662	2.70407e-76	8.04663e-73	682.42	773.44	1986.21	1994.41
chr4	26558710	26559415	706	*	9.306	7.84135	10.0177	-2.13997	2.80578e-76	8.21883e-73	216.01	242.67	1019.95	1053.27
chr5	57099701	57100645	945	*	10.3468	9.43926	10.8996	-1.44763	4.37514e-76	1.26187e-72	687.92	700.52	1846.64	1974.1
chr16	87229614	87230554	941	*	10.3538	9.36639	10.9345	-1.55067	6.81933e-76	1.93702e-72	604	716.06	2022.25	1891.99
chr3	142960309	142961371	1063	*	9.19328	7.64846	9.92209	-2.23338	8.58115e-76	2.40108e-72	188.49	212.79	976.23	964.1
chr4	1317342	1318765	1424	*	9.68567	10.3372	8.46542	1.8531	1.2787e-75	3.52529e-72	1205.24	1381.92	334.36	372.57
chr5	73789073	73789794	722	*	9.06259	7.40688	9.8133	-2.3677	5.91289e-75	1.60652e-71	181.61	157.8	886.51	912.89
chr20	26188658	26189538	881	*	13.2002	13.5548	12.729	0.822613	7.42645e-75	1.98893e-71	12649.5	11418.8	6802.97	6775.16
chr3	132756929	132757656	728	*	8.69613	9.47849	6.85992	2.57058	1.09548e-74	2.89255e-71	715.44	711.28	104.3	128.02
chr9	111490895	111491961	1067	*	8.80938	6.85771	9.60969	-2.698	1.58169e-74	4.11837e-71	127.95	104	782.98	779.58
chr19	46170832	46171775	944	*	9.00829	9.74219	7.43853	2.26755	4.66503e-74	1.19803e-70	800.74	912.12	169.48	177.46
chr21	43042878	43043453	576	*	8.65497	9.44085	6.79697	2.5865	7.00111e-74	1.77367e-70	663.16	726.82	117.33	105.06
chr10	103590097	103590934	838	*	11.0022	11.444	10.3623	1.07651	4.78482e-73	1.19603e-69	2753.07	2818.83	1319.8	1312.83
chr16	3206911	3209381	2471	*	12.1408	12.4914	11.6766	0.811437	4.90662e-73	1.21033e-69	5822.58	5693.85	3329.01	3218.07
chr7	22884603	22885597	995	*	9.19943	7.71672	9.91505	-2.16242	9.90841e-73	2.4124e-69	209.13	211.59	939.42	991.46
chr5	66943808	66944842	1035	*	9.9752	8.93501	10.5733	-1.61847	1.94447e-72	4.67351e-69	463.66	515.23	1479.31	1567.98
chr1	198567706	198568474	769	*	9.55269	8.27973	10.2183	-1.90787	2.2185e-72	5.26464e-69	282.05	339.5	1193.26	1189.23
chr20	49294694	49295421	728	*	9.74834	8.65129	10.3643	-1.69513	2.79112e-72	6.5407e-69	407.25	396.88	1325.16	1311.06
chr3	177622411	177624275	1865	*	10.648	9.89223	11.1413	-1.23979	3.09512e-72	7.16355e-69	928.7	971.89	2241.58	2276.04
chr1	43429132	43429647	516	*	10.3064	9.44508	10.842	-1.38529	3.18553e-72	7.28289e-69	685.17	708.89	1848.94	1822.25
chr12	43119558	43120227	670	*	9.11922	7.59796	9.8431	-2.20733	4.31256e-72	9.74076e-69	192.62	194.86	912.58	924.37
chr17	31787884	31788594	711	*	10.0152	9.04748	10.5892	-1.5277	4.67084e-72	1.04244e-68	531.08	527.19	1542.19	1538.85
chr13	104260435	104260988	554	*	8.88363	6.99631	9.67414	-2.6301	4.72797e-71	1.04278e-67	151.34	104	830.53	803.41
chr6	159605470	159606053	584	*	9.59138	8.40223	10.2343	-1.8063	1.04872e-70	2.28612e-67	319.2	357.43	1210.13	1198.94
chr4	13324000	13324879	880	*	9.11635	7.51624	9.85633	-2.30226	1.07223e-70	2.31049e-67	193.99	172.14	981.6	872.28
chr17	4383391	4384246	856	*	10.2101	9.28295	10.7699	-1.47207	1.72354e-70	3.67177e-67	594.37	651.51	1800.63	1691.58
chr1	209589106	209589878	773	*	10.2684	9.39277	10.8094	-1.40291	2.38411e-70	5.02195e-67	643.9	700.52	1802.93	1786.05
chr2	51614214	51614865	652	*	9.03209	7.46513	9.76542	-2.26041	8.32873e-70	1.73489e-66	178.86	174.53	889.58	851.09
chr16	82077318	82078441	1124	*	10.3284	9.49369	10.8538	-1.34837	1.88242e-69	3.87803e-66	703.06	738.78	1860.44	1840.79
chr19	55884007	55884494	488	*	9.4323	10.0727	8.25198	1.80049	2.21735e-69	4.51838e-66	1073.16	1080.67	288.35	321.37
chr5	66812738	66813349	612	*	9.68642	8.54706	10.315	-1.74439	2.32377e-69	4.68432e-66	353.59	394.49	1309.06	1238.67
chr2	212046125	212047323	1199	*	9.398	8.12649	10.0632	-1.91198	4.03706e-69	8.05144e-66	287.55	271.36	1088.2	1051.5
chr18	8895942	8896538	597	*	9.2226	7.83836	9.91583	-2.04492	4.36878e-69	8.60997e-66	227.01	230.72	961.66	970.28
chr5	132110957	132111580	624	*	9.54127	8.30315	10.1976	-1.86637	4.40896e-69	8.60997e-66	295.81	335.92	1218.57	1130.08
chr1	1136678	1137273	596	*	8.81077	9.5439	7.24483	2.25727	8.63219e-69	1.66834e-65	727.82	765.08	154.14	149.21
chr6	27463254	27464308	1055	*	8.17445	9.02223	5.85442	3.08121	1.20707e-68	2.30911e-65	518.69	521.21	52.15	63.57
chr15	63364904	63366421	1518	*	9.77245	8.65659	10.3941	-1.71219	2.15012e-68	4.07159e-65	365.98	441.11	1346.64	1344.61
chr17	8089853	8091380	1528	*	12.0209	12.3656	11.5669	0.796398	3.4341e-68	6.43798e-65	5281.88	5273.05	2984.69	3082.99
chr2	201042440	201043530	1091	*	9.31356	7.95763	10	-2.00655	6.17975e-68	1.14706e-64	227.01	270.17	1040.65	1007.36
chr20	361294	363238	1945	*	10.9878	11.4228	10.3623	1.05468	7.15182e-68	1.31448e-64	2707.67	2782.97	1343.57	1288.99
chr7	18827572	18828117	546	*	8.8501	6.975	9.63869	-2.59217	1.80142e-67	3.27879e-64	104.56	147.04	835.9	758.39
chr1	79180767	79181469	703	*	9.46791	8.28062	10.1103	-1.80599	5.33379e-67	9.61478e-64	312.32	309.62	1103.54	1107.12
chr14	62145434	62146209	776	*	8.82652	7.04985	9.59895	-2.48553	5.68331e-67	1.01472e-63	115.57	149.43	783.75	767.22
chr3	197221208	197221938	731	*	9.96196	9.00086	10.5337	-1.51989	1.10812e-66	1.95982e-63	529.7	494.91	1516.88	1447.91
chr17	70171520	70172761	1242	*	9.96767	8.97797	10.5492	-1.55905	1.26051e-66	2.20851e-63	543.46	465.02	1509.98	1486.76
chr2	87644464	87646267	1804	*	8.19505	9.1768	2.88086	6.1896	1.78079e-66	3.09118e-63	558.59	598.91	7.67	7.06
chr2	183480670	183482427	1758	*	10.2069	9.29897	10.7598	-1.4501	1.85677e-66	3.19351e-63	654.9	604.89	1809.83	1658.03
chr11	78803778	78804623	846	*	9.99778	9.04191	10.5677	-1.5096	1.89476e-66	3.22923e-63	509.06	545.12	1562.9	1472.63
chr1	3233148	3233451	304	*	7.89573	8.81004	4.77956	3.90325	2.15889e-66	3.64623e-63	473.29	424.38	33.74	21.19
chr17	80197979	80198360	382	*	9.54497	10.1523	8.47569	1.6583	2.6412e-66	4.421e-63	1111.68	1164.35	353.53	358.45
chr10	50776993	50777875	883	*	10.5776	9.83429	11.0657	-1.22119	4.75515e-66	7.88901e-63	877.79	947.98	2149.56	2137.43
chr20	61855383	61856645	1263	*	11.7397	11.2534	12.1027	-0.845521	1.70633e-65	2.80604e-62	2409.11	2473.35	4379.63	4417.01
chr2	165824193	165824821	629	*	10.2732	9.40196	10.8125	-1.39463	2.06675e-65	3.3692e-62	627.39	725.63	1792.19	1804.59
chr12	52444360	52445676	1317	*	11.6582	12.0252	11.1647	0.85787	2.35379e-65	3.80405e-62	4123.41	4212.7	2255.39	2336.08
chr2	138266258	138266836	579	*	10.7605	10.0593	11.2303	-1.16183	2.44198e-65	3.91285e-62	1022.25	1111.75	2437.9	2366.98
chr5	90907475	90908391	917	*	8.4682	6.27485	9.30117	-2.93034	2.47192e-65	3.92725e-62	68.79	86.07	618.1	643.61
chr7	32132951	32133772	822	*	11.2951	10.7364	11.6968	-0.956508	6.80904e-65	1.07269e-61	1715.68	1696.32	3367.36	3271.92
chr7	135987643	135988499	857	*	9.56563	8.39876	10.2022	-1.7748	8.74445e-65	1.36612e-61	306.81	368.19	1180.99	1175.1
chr3	58027017	58028018	1002	*	10.3081	9.50412	10.8213	-1.30545	9.39137e-65	1.45506e-61	709.94	742.36	1792.19	1826.66
chr5	168220865	168221793	929	*	9.53412	10.1487	8.44158	1.68518	1.90518e-64	2.9276e-61	1095.17	1175.11	364.27	331.08
chr11	66717490	66718114	625	*	9.43572	10.0857	8.22105	1.83408	2.10457e-64	3.2077e-61	1148.83	1024.49	321.32	275.46
chr2	119444764	119445715	952	*	10.1262	9.26436	10.662	-1.38525	2.78454e-64	4.20986e-61	609.5	620.43	1648.79	1591.82
chr3	3741561	3742562	1002	*	9.10216	7.71385	9.79636	-2.04835	4.65912e-64	6.98763e-61	211.88	208.01	891.11	887.29
chr3	188985664	188986452	789	*	10.5386	9.78918	11.0293	-1.22973	7.46332e-64	1.11045e-60	850.27	919.29	2132.68	2047.38
chr6	27652020	27652617	598	*	9.46796	10.086	8.36383	1.6998	8.63488e-64	1.27464e-60	1052.52	1121.32	342.79	316.07
chr4	82392499	82393670	1172	*	10.5658	11.0441	9.84526	1.18959	1.45885e-63	2.13666e-60	2076.15	2147	958.6	881.11
chr7	76139161	76140051	891	*	10.2382	9.42314	10.7558	-1.32088	1.48486e-63	2.1579e-60	679.67	693.35	1704.77	1753.38
chr5	180596421	180597234	814	*	7.94646	8.82583	5.30639	3.39484	2.06276e-63	2.97469e-60	421.01	486.54	42.95	36.2
chr14	21130961	21131763	803	*	8.74596	9.48393	7.15596	2.27578	2.11209e-63	3.02258e-60	729.2	702.91	157.21	128.02
chr4	180724903	180726026	1124	*	8.87582	7.22613	9.62539	-2.34123	2.37335e-63	3.37073e-60	132.08	167.36	769.18	810.48
chr6	27639692	27640430	739	*	8.49416	9.26346	6.7357	2.46582	2.58775e-63	3.6476e-60	621.88	607.28	114.26	98.88
chr11	189651	190361	711	*	9.24796	9.90837	7.99458	1.88401	6.06416e-63	8.48404e-60	909.43	1012.53	269.94	240.14
chr1	25028605	25029686	1082	*	10.2451	9.36207	10.7889	-1.40973	7.08464e-63	9.83831e-60	601.25	714.87	1786.82	1751.62
chr6	3823267	3823750	484	*	9.59702	8.49457	10.2146	-1.69585	1.04385e-62	1.43892e-59	341.21	380.15	1221.64	1154.8
chr16	65581566	65582647	1082	*	10.0098	9.12762	10.5532	-1.41186	1.06758e-62	1.46088e-59	554.47	564.24	1506.91	1498.23
chr8	127600603	127601356	754	*	10.9299	10.221	11.4031	-1.17366	1.20087e-62	1.63137e-59	1155.71	1231.3	2855.08	2561.21
chr1	28835452	28835897	446	*	8.93368	7.40937	9.65821	-2.20409	1.69036e-62	2.27983e-59	167.85	172.14	779.91	836.08
chr9	127020155	127021197	1043	*	10.7223	11.1657	10.0788	1.08015	1.75273e-62	2.34705e-59	2283.91	2310.77	1097.4	1065.63
chr16	68526236	68527163	928	*	10.9843	10.3607	11.4183	-1.05177	2.78825e-62	3.70723e-59	1301.55	1328.13	2813.67	2660.09
chr2	40508055	40508920	866	*	9.06731	7.65598	9.7669	-2.07137	3.8373e-62	5.0661e-59	195.37	208.01	842.8	899.65
chr21	47062651	47063910	1260	*	10.4534	10.9314	9.73364	1.18844	4.76978e-62	6.25314e-59	2008.74	1897.15	854.3	848.44
chr13	67852340	67853132	793	*	9.93213	8.97875	10.5012	-1.50392	1.27393e-61	1.65852e-58	474.67	534.36	1492.34	1406.41
chr11	126009294	126010425	1132	*	9.13556	7.8079	9.81506	-1.97531	1.70749e-61	2.20763e-58	227.01	221.16	918.72	882.87
chr7	67829855	67830722	868	*	8.87696	7.2093	9.62991	-2.35739	1.76803e-61	2.27025e-58	123.83	172.14	771.48	813.12
chr8	127562879	127564382	1504	*	8.48696	6.43893	9.30105	-2.77136	2.08645e-61	2.66089e-58	74.3	99.22	648.01	613.6
chr2	185510692	185511697	1006	*	9.42	8.24492	10.0589	-1.78503	2.67443e-61	3.3877e-58	287.55	319.18	1036.82	1096.53
chr8	127435795	127436628	834	*	8.42304	6.35615	9.2397	-2.79992	3.6655e-61	4.61193e-58	82.55	81.29	586.66	622.42
chr20	34730601	34731389	789	*	8.86602	9.56085	7.47507	2.05075	3.92447e-61	4.90485e-58	734.7	775.84	174.85	180.99
chr6	135147951	135148631	681	*	10.4702	9.74168	10.952	-1.20217	4.0631e-61	5.04449e-58	859.9	852.34	2021.49	1940.55
chr11	113845389	113846287	899	*	8.6712	9.42124	7.01905	2.35693	4.94443e-61	6.0983e-58	665.91	705.31	111.96	147.44
chr2	220526102	220527680	1579	*	9.946	8.98666	10.5172	-1.50961	7.71807e-61	9.457e-58	462.28	552.29	1466.27	1464.68
chr2	29527277	29528030	754	*	9.68605	8.66141	10.2791	-1.59571	8.53745e-61	1.03931e-57	386.61	423.18	1214.73	1270.45
chr8	53678329	53679196	868	*	9.87942	8.91019	10.454	-1.52273	1.16653e-60	1.41091e-57	445.77	516.43	1374.24	1431.13
chr9	16119288	16120761	1474	*	10.5023	9.76905	10.9862	-1.20655	1.69044e-60	2.03148e-57	836.52	908.53	2065.2	1991.76
chr17	74236181	74237381	1201	*	11.1068	11.5233	10.5189	0.997656	2.17473e-60	2.59682e-57	2959.45	2927.61	1530.69	1403.77
chr13	80298355	80299080	726	*	8.76563	7.08502	9.52098	-2.38519	2.22411e-60	2.63898e-57	147.22	124.32	698.62	770.75
chr10	128555880	128556693	814	*	10.4535	9.73302	10.9318	-1.1893	2.56978e-60	3.02995e-57	836.52	865.49	1960.9	1945.85
chr6	134352846	134353392	547	*	9.29085	8.08293	9.93895	-1.82983	2.8734e-60	3.36676e-57	279.3	263	965.5	997.64
chr2	159684917	159686185	1269	*	8.66232	6.95992	9.42167	-2.40289	4.83188e-60	5.62635e-57	121.07	127.91	679.45	692.17
chr2	237583613	237584472	860	*	9.9643	9.07619	10.51	-1.41748	5.72961e-60	6.6305e-57	520.07	559.46	1440.19	1476.16
chr6	14671193	14672190	998	*	9.83164	8.90772	10.3903	-1.46681	6.24575e-60	7.18346e-57	478.79	481.76	1334.37	1349.91
chr2	30513503	30513930	428	*	9.10752	7.78344	9.78613	-1.9705	6.49812e-60	7.42814e-57	224.26	216.37	904.15	861.68
chr4	113282182	113282952	771	*	10.4653	9.72864	10.9505	-1.21478	8.05805e-60	9.15551e-57	879.17	817.68	2025.32	1932.61
chr13	101670868	101672084	1217	*	10.9606	10.3726	11.3772	-0.999003	1.30081e-59	1.46907e-56	1322.19	1329.32	2658	2661.86
chr2	17288280	17289079	800	*	9.72363	8.75695	10.2973	-1.52223	1.65742e-59	1.8606e-56	426.51	438.72	1251.54	1265.15
chr2	30484658	30486154	1497	*	8.29702	5.96422	9.14622	-3.08967	2.00163e-59	2.23362e-56	77.05	47.82	562.89	570.34
chr1	17053641	17054436	796	*	8.47559	9.23061	6.79681	2.37962	2.09161e-59	2.32023e-56	620.51	580.98	105.83	116.54
chr12	68829525	68830081	557	*	9.61118	8.55768	10.2135	-1.63557	2.46698e-59	2.72053e-56	386.61	367	1139.58	1235.14
chr5	37771266	37772421	1156	*	11.6656	11.1836	12.0262	-0.839683	2.77728e-59	3.0448e-56	2337.56	2314.36	4266.9	4075.33
chr2	46880563	46881311	749	*	8.88787	7.41625	9.60106	-2.1454	5.34978e-59	5.83101e-56	180.24	161.38	774.55	778.69
chr8	37584415	37585184	770	*	9.89069	8.95737	10.4527	-1.48152	7.22882e-59	7.83353e-56	525.57	468.61	1361.21	1441.73
chr10	120788750	120790411	1662	*	11.8992	12.2308	11.4679	0.760621	8.34077e-59	8.98656e-56	4728.79	4884.54	2815.97	2849.03
chr7	47445259	47446620	1362	*	10.3004	9.51141	10.8076	-1.28329	1.03231e-58	1.10588e-55	711.31	748.34	1726.24	1858.44
chr19	51161224	51162088	865	*	9.3564	9.9655	8.28149	1.66198	1.15881e-58	1.23435e-55	972.72	1026.88	315.95	306.36
chr22	35281977	35283207	1231	*	9.19285	7.89892	9.86383	-1.93336	3.05929e-58	3.24029e-55	249.03	228.33	882.68	980.87
chr10	127932471	127933071	601	*	9.67351	8.66021	10.2629	-1.58718	4.15912e-58	4.38044e-55	436.14	372.97	1235.44	1221.89
chr2	122857820	122858892	1073	*	10.318	9.57207	10.8072	-1.22569	5.24992e-58	5.4984e-55	760.84	761.49	1826.7	1756.91
chr16	65669339	65670652	1314	*	9.47165	8.32198	10.1032	-1.75023	7.71158e-58	8.0317e-55	286.18	353.85	1121.94	1077.99
chr19	29373838	29374775	938	*	9.77948	8.84627	10.3415	-1.47975	1.19437e-57	1.23707e-54	465.04	455.46	1329.76	1265.15
chr4	177357140	177358219	1080	*	10.0089	9.09601	10.5636	-1.44895	1.55867e-57	1.60553e-54	506.31	588.15	1568.26	1458.5
chr19	2524770	2525636	867	*	10.9144	11.3481	10.2913	1.05161	1.91686e-57	1.9637e-54	2473.77	2739.93	1250.78	1255.44
chr1	97610829	97611507	679	*	9.27236	8.10123	9.91013	-1.78008	3.12965e-57	3.18871e-54	268.29	280.93	947.86	976.46
chr4	127820351	127821034	684	*	9.95497	9.09276	10.4909	-1.38653	3.54661e-57	3.594e-54	569.6	522.4	1447.86	1430.25
chr14	63630818	63631486	669	*	9.78505	8.81457	10.36	-1.5233	3.72169e-57	3.75114e-54	412.75	487.74	1323.63	1304.88
chr20	25037746	25039067	1322	*	9.53355	10.1072	8.56682	1.52272	4.63362e-57	4.64531e-54	1115.81	1090.23	373.47	384.93
chr17	13442197	13442980	784	*	10.8207	10.1586	11.2728	-1.10639	5.67429e-57	5.65835e-54	1114.44	1171.52	2585.91	2362.56
chr1	172465975	172466785	811	*	10.2258	9.46787	10.7202	-1.24218	7.60895e-57	7.54744e-54	708.56	707.7	1707.84	1665.98
chr22	22428917	22429920	1004	*	10.6763	10.0188	11.1263	-1.09933	7.80306e-57	7.69923e-54	1008.5	1066.33	2288.36	2182.46
chr12	23293496	23294090	595	*	8.79889	7.2849	9.52124	-2.18784	9.06365e-57	8.89623e-54	154.09	157.8	708.59	761.04
chr6	107435374	107437436	2063	*	11.7775	12.117	11.3326	0.780571	9.41685e-57	9.19477e-54	4547.17	4337.03	2582.84	2575.34
chr4	118245896	118246986	1091	*	9.81103	8.90396	10.3636	-1.44523	9.74113e-57	9.46212e-54	487.05	471	1344.34	1290.76
chr7	7950712	7951796	1085	*	10.4517	9.72389	10.9332	-1.20147	9.86848e-57	9.53641e-54	864.03	827.24	2029.16	1881.4
chr1	120096126	120097301	1176	*	9.23431	7.88914	9.91814	-1.99666	1.00988e-56	9.70894e-54	251.78	222.35	1052.16	882.87
chr1	39607634	39608788	1155	*	9.60861	8.60039	10.1963	-1.57508	1.14484e-56	1.09503e-53	376.98	399.27	1209.37	1137.14
chr6	119398754	119400710	1957	*	10.7674	11.1859	10.1753	1.00468	1.21316e-56	1.15449e-53	2330.68	2328.7	1158.75	1153.91
chr6	119558478	119558764	287	*	9.06504	9.72936	7.79681	1.9005	1.27765e-56	1.20972e-53	903.93	793.77	211.66	233.08
chr1	198356346	198357338	993	*	8.27257	6.11667	9.10088	-2.88173	1.76282e-56	1.6607e-53	64.66	74.12	572.86	525.31
chr1	42127324	42128881	1558	*	11.2991	11.6708	10.797	0.86914	1.78245e-56	1.6708e-53	3315.79	3204.95	1789.12	1769.27
chr7	110013387	110014043	657	*	8.98608	7.647	9.6684	-1.986	1.83734e-56	1.71368e-53	203.63	197.25	826.69	800.76
chr7	28232280	28233124	845	*	8.86497	7.41415	9.57354	-2.11161	2.13919e-56	1.98534e-53	158.22	182.9	758.44	765.45
chr6	26556665	26557354	690	*	10.1198	10.6554	9.25862	1.37973	2.61595e-56	2.41585e-53	1606.99	1618.62	667.95	557.09
chr6	57534909	57535784	876	*	9.78264	8.84683	10.3456	-1.48326	2.80761e-56	2.58013e-53	467.79	453.07	1351.24	1251.03
chr9	32644615	32645300	686	*	10.51	9.7954	10.9857	-1.17945	3.05266e-56	2.79165e-53	844.77	932.44	2079.77	1975.87
chr10	85313047	85313800	754	*	9.11733	7.84892	9.7817	-1.90358	4.26914e-56	3.88516e-53	243.52	217.57	904.91	855.5
chr17	25646578	25647381	804	*	9.58843	8.56813	10.1801	-1.58988	6.23861e-56	5.65007e-53	364.6	394.49	1201.7	1118.6
chr12	22174067	22174517	451	*	7.8074	8.68022	5.24053	3.2961	6.34112e-56	5.7153e-53	440.27	380.15	42.95	32.67
chr14	32941729	32943121	1393	*	10.172	9.39429	10.6745	-1.2711	6.52312e-56	5.85121e-53	700.31	645.53	1643.42	1625.37
chr1	155953128	155953869	742	*	10.566	11.0096	9.92224	1.08111	1.02791e-55	9.17643e-53	2007.36	2115.92	963.2	977.34
chr5	52638822	52639579	758	*	9.99666	9.13574	10.5321	-1.37973	1.12617e-55	1.00059e-52	529.7	595.33	1515.35	1446.14
chr3	34840663	34841360	698	*	8.0542	5.42593	8.93254	-3.35681	1.30711e-55	1.15588e-52	35.77	50.21	496.94	480.28
chr6	15922524	15923564	1041	*	9.21419	7.99101	9.86649	-1.85023	1.35564e-55	1.19317e-52	279.3	229.52	941.72	925.25
chr2	228048457	228049126	670	*	8.45165	6.60324	9.23599	-2.5539	1.63905e-55	1.43587e-52	88.05	106.39	618.87	587.11
chrX	11985990	11987351	1362	*	8.7489	7.20798	9.47689	-2.22356	2.61134e-55	2.27699e-52	158.22	137.47	740.04	685.11
chr1	222258251	222258789	539	*	9.42203	8.36165	10.0266	-1.64068	2.92475e-55	2.53846e-52	321.95	335.92	1028.38	1057.68
chr8	33210665	33211533	869	*	8.46226	6.64318	9.24181	-2.53486	4.04193e-55	3.49193e-52	111.44	88.46	615.8	595.06
chr8	126478668	126479637	970	*	11.0833	10.4933	11.5008	-0.999174	4.16275e-55	3.57981e-52	1355.21	1527.76	2897.26	2898.47
chr16	70781984	70782616	633	*	11.2578	10.7237	11.6467	-0.917241	6.07094e-55	5.18362e-52	1633.13	1748.92	3267.66	3144.79
chr16	82038078	82039345	1268	*	8.94702	7.61058	9.6287	-1.9792	6.08303e-55	5.18362e-52	191.24	199.64	786.05	797.23
chr5	78102229	78103390	1162	*	10.9082	10.3206	11.3245	-0.997209	6.17092e-55	5.23473e-52	1245.14	1312.58	2610.45	2518.83
chr5	32810826	32811546	721	*	9.21209	7.92901	9.88029	-1.92354	6.43748e-55	5.43625e-52	271.04	216.37	992.34	892.58
chr20	25020233	25021449	1217	*	9.85393	8.95199	10.4047	-1.43326	6.57869e-55	5.51092e-52	460.91	529.58	1361.21	1349.91
chr11	85862028	85863677	1650	*	11.0727	10.5317	11.4652	-0.928932	6.58469e-55	5.51092e-52	1483.16	1477.55	2861.22	2793.41
chr2	239025417	239026409	993	*	9.40076	9.99137	8.38369	1.58575	7.52199e-55	6.26739e-52	993.36	1042.42	346.63	321.37
chr4	87038802	87039510	709	*	9.3442	8.11045	9.99936	-1.85509	9.53988e-55	7.91354e-52	258.66	294.08	1105.07	942.02
chr13	60021925	60022916	992	*	8.74611	7.24824	9.46501	-2.17176	1.17435e-54	9.69856e-52	158.22	145.84	723.93	689.52
chr1	14630631	14631479	849	*	10.3011	9.58376	10.778	-1.18539	1.67872e-54	1.38032e-51	773.23	761.49	1781.46	1730.43
chr14	54107385	54108059	675	*	9.64855	8.69391	10.2181	-1.50848	2.23057e-54	1.82607e-51	436.14	392.1	1189.43	1192.76
chr2	216563258	216563793	536	*	9.06484	7.80812	9.72614	-1.88805	2.28551e-54	1.86291e-51	236.65	211.59	854.3	839.61
chr4	157536000	157537038	1039	*	9.26667	8.1095	9.90043	-1.75872	2.64321e-54	2.14514e-51	255.91	296.47	945.56	965.86
chr1	60204193	60205001	809	*	10.02	9.21443	10.5339	-1.30792	2.70481e-54	2.18568e-51	609.5	578.59	1461.67	1503.53
chr4	140593203	140593858	656	*	9.01488	7.69293	9.69296	-1.9624	4.15051e-54	3.3395e-51	202.25	211.59	869.64	785.76
chr1	196373240	196373834	595	*	9.20332	8.04554	9.83726	-1.76558	4.83942e-54	3.87716e-51	273.79	254.63	914.88	914.65
chr8	127591949	127592820	872	*	10.6427	9.99599	11.0876	-1.08484	6.9289e-54	5.52755e-51	1025.01	1017.31	2248.48	2103.88
chr19	44376614	44377537	924	*	7.94642	8.7683	5.84046	2.83191	7.42239e-54	5.89615e-51	451.28	420.79	53.68	60.92
chr13	24364669	24365467	799	*	9.4791	8.45223	10.0729	-1.59729	8.74733e-54	6.91933e-51	337.08	363.41	1103.54	1050.62
chr17	39088692	39089548	857	*	9.40627	8.36742	10.004	-1.61453	1.00934e-53	7.92034e-51	332.95	327.55	1026.85	1026.78
chr5	139040514	139041360	847	*	11.5542	11.9047	11.0901	0.811468	1.00973e-53	7.92034e-51	3727.17	3941.34	2197.87	2162.15
chr5	37792754	37793652	899	*	10.2844	9.51177	10.7849	-1.26528	1.80604e-53	1.41075e-50	786.98	673.03	1792.96	1735.73
chr7	106061521	106062264	744	*	10.3798	9.64442	10.8645	-1.20656	2.11389e-53	1.64438e-50	747.08	853.54	1835.14	1893.76
chr4	115202442	115203140	699	*	9.58541	8.6326	10.1543	-1.50228	2.24802e-53	1.74149e-50	392.12	401.67	1134.98	1144.2
chr11	59317726	59319002	1277	*	11.5049	11.8495	11.0512	0.795394	2.37321e-53	1.83091e-50	3645.99	3734.53	2100.48	2143.61
chr2	151773434	151773987	554	*	9.01574	7.71873	9.68752	-1.92885	2.53916e-53	1.95091e-50	195.37	225.94	846.63	802.53
chr19	2546252	2547079	828	*	10.7246	11.1397	10.1396	0.993483	2.57824e-53	1.97285e-50	2259.14	2253.39	1148.01	1108
chr12	104195696	104196670	975	*	11.2716	10.7326	11.6631	-0.924023	2.88847e-53	2.20125e-50	1619.37	1783.59	3301.41	3184.52
chr16	3237754	3239846	2093	*	10.8244	11.2317	10.2548	0.970327	3.49005e-53	2.64893e-50	2455.89	2353.81	1232.37	1211.3
chr10	14301701	14302726	1026	*	9.09674	7.89038	9.74441	-1.82295	4.58097e-53	3.46292e-50	236.65	237.89	875.01	840.49
chr1	49572010	49572496	487	*	9.50447	8.47248	10.0999	-1.60967	5.08025e-53	3.82492e-50	385.24	325.16	1114.27	1080.63
chr7	28081044	28081752	709	*	10.3763	9.69551	10.837	-1.13343	5.16462e-53	3.87288e-50	840.64	817.68	1829	1829.31
chr3	190543713	190544458	746	*	9.03684	7.79397	9.69445	-1.86735	5.97754e-53	4.46463e-50	221.51	222.35	846.63	810.48
chr7	32155319	32156390	1072	*	9.65313	8.68848	10.2261	-1.5197	6.00384e-53	4.46648e-50	430.64	394.49	1148.01	1247.5
chr6	90121095	90122598	1504	*	9.98653	10.4825	9.22457	1.24618	6.03854e-53	4.4697e-50	1428.13	1433.32	605.83	590.64
chr8	56537404	56538320	917	*	9.95345	9.10997	10.4822	-1.36132	6.05586e-53	4.4697e-50	587.49	517.62	1457.07	1403.77
chr8	2199760	2200532	773	*	7.48481	8.42423	3.88086	4.44606	6.30719e-53	4.63695e-50	316.44	370.58	15.34	14.13
chr18	51413608	51414594	987	*	9.85876	9.0077	10.3905	-1.36609	7.52782e-53	5.51272e-50	493.93	535.55	1344.34	1340.2
chr12	6162109	6163344	1236	*	10.4347	9.7708	10.8877	-1.10867	8.36429e-53	6.10144e-50	870.91	876.25	1909.52	1879.63
chr6	76095715	76096472	758	*	9.76197	8.87254	10.3081	-1.41854	8.97279e-53	6.51995e-50	466.41	471	1231.6	1304
chr12	26287696	26288809	1114	*	10.325	9.6011	10.8048	-1.19201	1.11147e-52	8.04517e-50	741.58	811.7	1830.54	1747.2
chr1	228639771	228640702	932	*	10.0138	10.5077	9.25691	1.23911	1.29198e-52	9.31581e-50	1439.14	1472.77	625	598.59
chr2	65096961	65097309	349	*	7.5383	8.49538	3.44591	4.99643	1.53486e-52	1.10246e-49	326.08	395.69	7.67	14.13
chr15	72611860	72613068	1209	*	11.1872	11.5709	10.6628	0.904764	2.1275e-52	1.52231e-49	2933.31	3151.16	1590.5	1651.85
chr7	127855418	127856196	779	*	9.64485	8.71567	10.2054	-1.47005	2.35894e-52	1.6815e-49	404.5	436.33	1198.63	1162.74
chr3	148506774	148507351	578	*	9.99726	9.20561	10.5055	-1.28781	2.62688e-52	1.8654e-49	599.87	580.98	1429.46	1477.93
chr6	28784762	28785320	559	*	8.7288	9.4131	7.38168	1.98928	2.99738e-52	2.12047e-49	661.78	701.72	176.38	157.15
chr12	30613516	30614719	1204	*	8.39379	6.59434	9.17007	-2.49682	3.17821e-52	2.23995e-49	88.05	105.2	589.73	562.39
chr1	19132092	19133256	1165	*	9.73485	8.85876	10.276	-1.40117	3.25849e-52	2.28792e-49	462.28	466.22	1238.51	1241.32
chr11	125024511	125026057	1547	*	7.59838	8.48833	4.8311	3.49695	4.14525e-52	2.89969e-49	335.71	382.54	32.21	24.72
chr3	112493817	112494726	910	*	9.59272	8.58077	10.1816	-1.57379	5.29163e-52	3.68786e-49	342.59	423.18	1161.82	1160.98
chr2	235602917	235603852	936	*	10.1468	9.40918	10.6325	-1.21207	5.71591e-52	3.96879e-49	670.04	689.76	1598.17	1576.81
chr3	105716351	105717444	1094	*	10.4553	9.7925	10.9077	-1.10651	8.83364e-52	6.11092e-49	872.29	901.36	1962.44	1879.63
chr4	16142250	16143063	814	*	10.4027	9.7233	10.8627	-1.12868	9.52539e-52	6.56524e-49	813.13	877.45	1848.17	1876.1
chr11	104571281	104571996	716	*	8.91078	7.62136	9.58061	-1.92146	1.91605e-51	1.31577e-48	195.37	198.44	761.51	769.86
chr2	7005342	7006825	1484	*	8.72192	9.41403	7.34244	2.03153	2.27805e-51	1.55865e-48	714.06	650.32	148.01	176.57
chr5	125514210	125514739	530	*	8.87969	7.55179	9.55925	-1.96644	2.49912e-51	1.70369e-48	181.61	193.66	776.08	732.78
chr4	54633584	54634119	536	*	9.02134	7.77403	9.68014	-1.87475	2.56169e-51	1.74002e-48	229.77	208.01	849.7	791.05
chr2	7057189	7058360	1172	*	8.0845	8.86359	6.26818	2.51787	2.99105e-51	2.02433e-48	467.79	463.83	78.22	75.93
chr3	149501420	149502420	1001	*	10.3791	9.66398	10.8551	-1.18427	3.11418e-51	2.10008e-48	868.16	754.32	1873.48	1831.08
chr12	18527838	18528740	903	*	8.22652	6.26261	9.02865	-2.67666	3.46755e-51	2.33e-48	77.05	76.51	542.18	502.35
chr11	110396497	110397259	763	*	10.013	9.19654	10.5312	-1.31754	3.71517e-51	2.48747e-48	543.46	629.99	1486.21	1473.51
chr19	2494774	2495988	1215	*	11.5079	11.844	11.069	0.771983	5.58662e-51	3.72717e-48	3633.61	3718.99	2144.95	2151.56
chr18	2009900	2010644	745	*	8.07421	5.80427	8.91631	-2.99415	6.96734e-51	4.63185e-48	59.16	52.6	452.46	513.83
chr5	54182462	54183099	638	*	9.14132	7.98113	9.77595	-1.76877	8.03395e-51	5.32205e-48	271.04	234.3	881.14	872.28
chr6	27059450	27060025	576	*	8.61352	9.30541	7.23496	2.0282	9.45275e-51	6.23988e-48	606.75	658.68	150.31	150.97
chr11	86270283	86271037	755	*	10.1728	9.44897	10.6526	-1.19193	1.14391e-50	7.52459e-48	686.55	711.28	1584.37	1635.08
chr5	111272580	111273193	614	*	8.98692	7.68955	9.65879	-1.92484	1.20684e-50	7.91076e-48	185.74	227.13	781.45	835.2
chr7	55375671	55376577	907	*	10.4438	9.71718	10.9248	-1.19341	1.22258e-50	7.98603e-48	767.72	915.7	1944.8	1943.2
chr1	246160680	246161648	969	*	9.7961	8.83943	10.3663	-1.5021	1.24195e-50	8.08444e-48	404.5	511.65	1352.77	1287.23
chr8	101898046	101898734	689	*	9.24978	9.84376	8.22239	1.59794	1.51701e-50	9.84073e-48	887.42	950.37	305.98	291.35
chr11	134945599	134946536	938	*	8.17394	8.94389	6.4117	2.46526	1.79911e-50	1.16304e-47	473.29	511.65	76.69	93.58
chr5	36156256	36157130	875	*	8.84834	7.50723	9.53116	-1.98463	1.83122e-50	1.17973e-47	185.74	178.12	769.94	709.83
chr16	48132116	48132930	815	*	8.48578	6.87943	9.22698	-2.28777	2.06657e-50	1.3268e-47	118.32	117.15	604.3	594.17
chr5	76060928	76061750	823	*	9.92387	9.12506	10.435	-1.29502	2.20747e-50	1.41242e-47	539.33	577.39	1388.81	1379.93
chr6	114150903	114151332	430	*	9.00831	7.77084	9.66447	-1.85819	2.24846e-50	1.43375e-47	213.26	223.55	844.33	778.69
chr4	111948424	111949217	794	*	8.91706	7.65428	9.57995	-1.88912	2.26789e-50	1.44124e-47	200.87	202.03	766.11	764.57
chr6	43911412	43912084	673	*	10.3111	9.61223	10.7799	-1.15647	2.36823e-50	1.49992e-47	751.21	814.09	1792.19	1724.25
chr21	44831343	44832768	1426	*	8.51597	6.84602	9.26935	-2.35333	2.89521e-50	1.82751e-47	104.56	125.52	654.15	580.05
chr10	112174145	112174805	661	*	10.7298	11.1325	10.1691	0.957813	3.49182e-50	2.19671e-47	2260.52	2229.48	1137.28	1165.39
chr8	50538239	50538907	669	*	8.75065	7.37057	9.4429	-2.03044	3.76605e-50	2.3613e-47	171.98	158.99	690.96	701
chr12	78961798	78962791	994	*	9.59069	8.65646	10.1531	-1.48091	4.32417e-50	2.7022e-47	429.26	377.76	1148.01	1129.19
chr1	26487963	26488823	861	*	9.45292	10.0117	8.52866	1.46572	5.3316e-50	3.32069e-47	1004.37	1060.35	364.27	374.34
chr2	163677519	163678450	932	*	8.66562	7.23253	9.3702	-2.08998	7.43354e-50	4.61451e-47	151.34	149.43	658.75	664.8
chr17	62307702	62308908	1207	*	9.69108	8.82465	10.2286	-1.38857	7.55219e-50	4.67268e-47	460.91	445.9	1196.33	1203.35
chr17	73029644	73031533	1890	*	12.2953	12.592	11.9215	0.666939	8.10411e-50	4.99768e-47	6181.68	6166.04	3996.96	3761.03
chr14	33162251	33162917	667	*	9.79885	8.88615	10.3535	-1.44707	8.3999e-50	5.1631e-47	443.02	503.28	1378.84	1237.79
chr10	53149159	53150161	1003	*	9.76634	8.90701	10.3012	-1.37938	9.94421e-50	6.09236e-47	484.3	475.78	1305.99	1217.48
chr1	103686139	103686735	597	*	8.97067	7.74331	9.6241	-1.84375	1.06757e-49	6.51918e-47	205	223.55	796.02	782.22
chr9	98541017	98541636	620	*	9.74934	8.90141	10.2798	-1.36161	1.09336e-49	6.65501e-47	465.04	491.32	1247.71	1238.67
chr20	42765738	42766566	829	*	10.502	9.85101	10.9489	-1.09199	1.14065e-49	6.9204e-47	967.22	879.84	2013.82	1939.67
chr11	7534169	7535803	1635	*	10.572	11.0078	9.94459	1.05754	1.15471e-49	6.98307e-47	1977.09	2141.02	955.53	1015.3
chr11	132952461	132953390	930	*	8.1725	8.93431	6.45648	2.41195	1.28593e-49	7.75164e-47	469.16	509.25	82.06	93.58
chr2	27984135	27984920	786	*	10.3492	9.66749	10.8103	-1.132	1.69102e-49	1.01609e-46	797.99	828.43	1740.81	1850.5
chr2	86275766	86276522	757	*	9.46824	8.44183	10.0619	-1.59406	1.93779e-49	1.15878e-46	326.08	369.39	1124.24	1013.54
chr2	161113119	161114173	1055	*	9.46212	8.50817	10.0314	-1.50334	1.94086e-49	1.15878e-46	365.98	362.22	1052.16	1040.91
chr5	73690424	73691627	1204	*	9.32089	8.28641	9.91717	-1.60466	1.94768e-49	1.15916e-46	304.06	320.38	944.03	989.7
chr19	39564224	39564729	506	*	10.0801	10.5703	9.33184	1.22942	2.05863e-49	1.22131e-46	1484.54	1556.45	608.13	680.69
chr12	42361516	42362310	795	*	10.2741	9.59539	10.7339	-1.12909	2.24047e-49	1.32329e-46	767.72	779.42	1722.41	1683.64
chr2	109830048	109830918	871	*	9.27037	9.88619	8.17365	1.68503	2.24464e-49	1.32329e-46	868.16	1024.49	302.92	274.57
chr7	138023003	138023640	638	*	9.33323	8.31801	9.92323	-1.58347	2.38972e-49	1.40441e-46	327.45	310.81	977.77	964.1
chr5	67066154	67066842	689	*	9.76959	8.9196	10.3009	-1.36328	2.94676e-49	1.72636e-46	466.41	502.08	1233.91	1288.99
chr4	24765060	24766066	1007	*	9.45714	8.48461	10.0328	-1.52444	3.10241e-49	1.81188e-46	339.83	376.56	1055.99	1039.14
chr3	189281533	189282229	697	*	9.01608	7.82988	9.65813	-1.7975	3.15399e-49	1.83629e-46	233.89	221.16	821.33	794.58
chr15	41250385	41251369	985	*	7.39932	8.31162	4.31564	3.85436	3.26543e-49	1.89529e-46	315.07	320.38	16.87	22.95
chr2	227409106	227409933	828	*	9.67323	8.79466	10.2153	-1.40549	4.26034e-49	2.46511e-46	455.41	432.75	1219.33	1158.33
chr1	161409669	161410737	1069	*	10.1418	10.6161	9.43029	1.17733	4.48283e-49	2.58586e-46	1512.06	1626.98	671.78	708.06
chr4	26178172	26178998	827	*	10.0455	9.29014	10.5387	-1.23543	4.6356e-49	2.66578e-46	605.37	646.73	1518.42	1456.74
chr8	142427547	142428284	738	*	7.97131	8.76352	6.07312	2.5983	5.08819e-49	2.91711e-46	429.26	439.92	72.85	61.8
chr6	146588694	146589749	1056	*	8.57065	7.06317	9.29161	-2.17033	5.1142e-49	2.92308e-46	125.2	142.26	626.54	626.84
chr16	1790253	1791909	1657	*	7.69727	8.55027	5.32946	3.09556	5.29736e-49	3.01856e-46	348.09	401.67	34.51	45.91
chr2	133034398	133034834	437	*	9.3989	10.2233	7.27368	2.84228	5.60531e-49	3.18436e-46	1212.12	1178.7	131.14	178.34
chr7	87257012	87258551	1540	*	10.439	10.8814	9.7978	1.07504	5.82251e-49	3.29775e-46	1831.25	1941.38	920.25	859.92
chr1	56320318	56321223	906	*	8.17506	6.24513	8.97212	-2.6401	6.09736e-49	3.44302e-46	81.17	70.53	492.34	512.07
chr11	1781570	1782410	841	*	11.6021	11.9298	11.1774	0.749675	7.75439e-49	4.36556e-46	3820.73	3981.99	2296.8	2335.2
chr14	84022363	84022903	541	*	9.02267	7.7692	9.68311	-1.87007	7.79858e-49	4.37729e-46	191.24	245.06	809.82	834.31
chr5	155381688	155382552	865	*	10.1256	9.40899	10.6022	-1.18201	8.51821e-49	4.76694e-46	668.66	690.96	1573.63	1535.31
chr6	27473244	27473839	596	*	9.24226	9.86941	8.10774	1.72681	1.12089e-48	6.25403e-46	1011.25	859.52	298.32	253.38
chr2	87655341	87656644	1304	*	7.53246	8.50348	2.88086	5.5172	1.31988e-48	7.34243e-46	320.57	405.25	7.67	7.06
chr3	20602617	20603070	454	*	8.08677	5.91923	8.91654	-2.88845	1.34656e-48	7.46868e-46	66.04	54.99	521.48	444.97
chr3	79986677	79987358	682	*	9.22389	8.12899	9.83915	-1.68662	1.40386e-48	7.76355e-46	304.06	255.82	904.91	927.02
chr20	16388008	16388959	952	*	8.33856	6.62483	9.09996	-2.39927	1.58e-48	8.71194e-46	92.18	105.2	548.32	549.15
chr13	110526851	110528029	1179	*	10.3384	9.65034	10.8023	-1.14324	1.62856e-48	8.95334e-46	833.76	773.44	1726.24	1845.2
chr19	18571689	18572233	545	*	10.236	9.53831	10.7043	-1.15735	1.73244e-48	9.49662e-46	756.72	730.41	1717.8	1619.19
chr7	124893535	124894341	807	*	9.25422	8.19693	9.85779	-1.63333	2.02731e-48	1.10806e-45	282.05	304.84	951.69	904.06
chr2	133015097	133015410	314	*	11.0769	11.444	10.5832	0.855349	2.09797e-48	1.14335e-45	2828.74	2743.52	1555.99	1512.36
chr15	88575981	88576411	431	*	8.32685	9.08772	6.61602	2.40943	2.81879e-48	1.53172e-45	513.19	575	80.52	115.66
chr12	22568403	22569317	915	*	8.90659	7.6159	9.57674	-1.92165	3.28783e-48	1.78143e-45	202.25	190.07	718.56	808.71
chr3	144077050	144077517	468	*	8.22379	6.31546	9.01756	-2.60104	3.30452e-48	1.78532e-45	66.04	93.24	519.18	517.36
chr5	31066564	31067382	819	*	8.68549	7.28521	9.3825	-2.05233	3.48352e-48	1.87662e-45	163.73	148.23	648.01	686.87
chr4	127976434	127977205	772	*	9.48509	8.50159	10.0645	-1.53676	3.57473e-48	1.92024e-45	331.58	393.3	1092.8	1048.85
chr5	31993097	31993978	882	*	9.60981	8.7161	10.1575	-1.42341	3.94884e-48	2.11513e-45	415.51	425.57	1177.16	1107.12
chr17	58650520	58651468	949	*	10.012	9.26568	10.5014	-1.22232	4.61909e-48	2.46709e-45	599.87	631.19	1430.99	1468.22
chr16	83847449	83848534	1086	*	9.44526	8.40372	10.0438	-1.60881	5.03404e-48	2.68108e-45	297.18	380.15	1055.22	1055.91
chr2	28858139	28858620	482	*	9.48876	8.53109	10.0593	-1.50841	5.32507e-48	2.82805e-45	372.85	367	1114.27	1019.72
chr1	53578020	53578971	952	*	11.1953	10.669	11.5801	-0.904141	6.13502e-48	3.24899e-45	1539.57	1716.64	3118.89	3004.41
chr7	13781496	13782135	640	*	9.56789	8.65065	10.1242	-1.45545	6.61949e-48	3.49569e-45	404.5	399.27	1160.28	1071.81
chr15	40346730	40347828	1099	*	11.0399	10.4884	11.4379	-0.942055	8.52808e-48	4.49095e-45	1362.09	1511.03	2845.11	2703.35
chrX	192614	193886	1273	*	10.9483	11.3377	10.4132	0.919435	9.72692e-48	5.10791e-45	2490.28	2686.14	1388.81	1338.43
chrX	68835578	68836741	1164	*	8.67609	9.34398	7.39417	1.91307	1.22462e-47	6.41288e-45	649.4	650.32	157.21	179.22
chr15	84040979	84041891	913	*	10.6336	10.0328	11.0565	-1.01459	1.63619e-47	8.5443e-45	998.86	1096.21	2144.19	2115.36
chr1	185510929	185511756	828	*	8.96757	7.7542	9.61718	-1.83034	1.71854e-47	8.94941e-45	229.77	202.03	758.44	812.24
chr19	35809612	35810579	968	*	10.5416	10.9667	9.93609	1.02277	1.74931e-47	9.08439e-45	1953.7	2048.97	1014.58	944.67
chr11	13616112	13617147	1036	*	9.73884	8.89507	10.2677	-1.35431	2.06185e-47	1.06779e-44	451.28	500.89	1250.78	1214.83
chr16	19302484	19303374	891	*	9.17674	8.05653	9.79964	-1.70847	2.1656e-47	1.11843e-44	240.77	291.69	911.05	871.39
chr15	31617875	31619621	1747	*	11.8225	12.1244	11.4402	0.680903	2.29386e-47	1.18141e-44	4492.14	4437.45	2779.93	2777.51
chr9	131101866	131103439	1574	*	11.682	12.0011	11.2716	0.726986	2.46786e-47	1.26755e-44	4010.59	4187.6	2443.27	2501.18
chr3	45586815	45587669	855	*	9.59142	10.1545	8.65521	1.47808	2.5753e-47	1.31911e-44	1064.91	1214.56	430.22	376.1
chr19	17790921	17791452	532	*	9.91999	10.4262	9.13319	1.2822	2.84532e-47	1.45346e-44	1304.3	1447.67	536.81	586.23
chr3	64330496	64331396	901	*	9.86267	9.08784	10.364	-1.26357	3.44633e-47	1.75568e-44	550.34	537.94	1322.1	1313.71
chr8	96705308	96706215	908	*	10.7897	10.2299	11.1919	-0.957642	3.51255e-47	1.78457e-44	1250.64	1151.2	2342.81	2336.08
chr20	13781261	13781841	581	*	10.158	9.39825	10.653	-1.23892	4.07806e-47	2.06628e-44	619.13	730.41	1648.02	1572.39
chr6	27655047	27656343	1297	*	10.852	11.2466	10.307	0.935441	5.85172e-47	2.95697e-44	2388.47	2470.96	1215.5	1318.13
chr5	72690806	72691681	876	*	8.06969	6.08658	8.87461	-2.68923	6.3019e-47	3.17588e-44	70.17	65.75	459.36	479.4
chr7	37940867	37942099	1233	*	9.40579	8.4348	9.98095	-1.52451	6.66844e-47	3.3516e-44	354.97	337.11	973.17	1047.97
chr1	68606179	68608175	1997	*	11.1347	10.6531	11.4951	-0.838043	7.11442e-47	3.56619e-44	1623.5	1597.1	2920.27	2852.56
chr8	16266661	16267283	623	*	9.72272	8.89017	10.2473	-1.33919	7.37008e-47	3.68449e-44	454.03	494.91	1217.8	1213.07
chr9	121358039	121359477	1439	*	10.1665	9.47641	10.6314	-1.14342	7.84935e-47	3.91365e-44	690.68	734	1591.27	1581.22
chr13	64009715	64010845	1131	*	10.1815	9.44538	10.6665	-1.21301	9.17447e-47	4.56222e-44	751.21	643.14	1657.99	1592.7
chr8	145560086	145562011	1926	*	9.86764	10.3611	9.11173	1.23849	9.96071e-47	4.9181e-44	1271.28	1359.21	541.42	565.04
chr9	35669322	35669821	500	*	9.36292	8.28109	9.97416	-1.65838	9.96768e-47	4.9181e-44	268.29	353.85	1018.41	993.23
chr4	158972289	158973103	815	*	9.01186	7.86708	9.64202	-1.74084	9.96884e-47	4.9181e-44	224.26	242.67	799.85	798.12
chr1	61274926	61275959	1034	*	10.1342	9.42105	10.6093	-1.17635	1.07971e-46	5.31273e-44	664.53	706.5	1606.61	1517.66
chr18	46148206	46150203	1998	*	11.4753	11.0474	11.8049	-0.753876	1.08521e-46	5.32582e-44	2113.3	2119.5	3602.02	3553.56
chr3	21431601	21432073	473	*	8.74774	7.38281	9.43636	-2.01368	1.32591e-46	6.4901e-44	184.36	149.43	720.86	664.8
chr5	172879192	172879479	288	*	8.2451	8.9821	6.65999	2.25467	1.34846e-46	6.58332e-44	492.55	518.82	110.43	91.82
chr21	28796516	28796921	406	*	8.96747	7.7988	9.60454	-1.77051	1.59832e-46	7.78288e-44	214.63	230.72	790.65	766.33
chr18	67821792	67822333	542	*	9.20121	8.16769	9.79717	-1.60297	1.65798e-46	8.05248e-44	283.42	291.69	890.34	889.05
chr2	30885501	30886059	559	*	9.9147	9.12666	10.4215	-1.27773	1.7089e-46	8.27833e-44	521.45	596.52	1378.84	1364.04
chr9	110930507	110931232	726	*	9.80946	9.01373	10.3194	-1.2894	1.75523e-46	8.48085e-44	499.43	534.36	1263.81	1291.64
chr22	30630798	30631411	614	*	10.4631	9.84728	10.8933	-1.03664	2.04536e-46	9.85729e-44	894.3	947.98	1881.15	1922.89
chr6	36547469	36547931	463	*	9.19609	8.15399	9.79482	-1.61554	2.15017e-46	1.03358e-43	287.55	282.12	909.52	866.98
chr3	120190346	120191683	1338	*	10.2211	9.52152	10.6902	-1.15517	2.17391e-46	1.04232e-43	689.3	780.62	1647.25	1657.15
chr20	36900894	36901906	1013	*	10.3024	9.63297	10.7578	-1.11447	2.22149e-46	1.06241e-43	769.1	818.87	1782.99	1680.1
chr9	134709089	134709785	697	*	7.94249	8.72247	6.12086	2.51349	2.59182e-46	1.23637e-43	434.77	410.03	72.09	67.1
chr10	17027920	17029604	1685	*	11.1842	10.7167	11.5368	-0.816238	2.7526e-46	1.30974e-43	1700.55	1665.24	2980.08	2962.03
chr6	48118561	48119374	814	*	8.25713	6.49213	9.02755	-2.44764	2.91603e-46	1.38399e-43	78.42	101.61	529.91	513.83
chr9	83314301	83315002	702	*	10.4925	9.89614	10.9133	-1.00989	4.65791e-46	2.20512e-43	958.97	946.78	1910.29	1946.73
chr10	127706375	127707071	697	*	8.20073	6.28699	8.99533	-2.59949	4.71829e-46	2.22808e-43	60.54	95.63	513.04	507.65
chr6	27520770	27521559	790	*	7.88894	8.68639	5.95646	2.63836	4.7685e-46	2.24613e-43	430.64	393.3	54.45	69.75
chr16	12282121	12283007	887	*	9.6185	8.71954	10.1681	-1.42525	5.14485e-46	2.41733e-43	385.24	457.85	1147.25	1153.91
chr3	148852319	148852961	643	*	9.73486	8.90141	10.2597	-1.34159	5.4029e-46	2.53223e-43	465.04	491.32	1270.72	1181.28
chr4	153180003	153180695	693	*	8.66157	7.3085	9.34733	-1.99246	5.80525e-46	2.71402e-43	156.85	160.19	667.95	634.78
chr2	26946852	26947699	848	*	10.8138	11.2126	10.2607	0.9475	6.91199e-46	3.2234e-43	2347.2	2399.23	1166.42	1287.23
chr3	197148679	197149718	1040	*	10.2393	9.57853	10.6908	-1.10397	7.03367e-46	3.272e-43	785.61	743.56	1638.05	1667.74
chr15	59608037	59608754	718	*	9.46439	8.55331	10.0185	-1.44617	7.51672e-46	3.48806e-43	378.36	372.97	1059.06	1015.3
chr15	39283380	39284329	950	*	9.6306	8.7533	10.1722	-1.40284	8.23527e-46	3.81206e-43	455.41	407.64	1115.81	1191.88
chr16	59244698	59245552	855	*	10.2877	9.58079	10.7601	-1.1647	1.19861e-45	5.53464e-43	712.69	818.87	1677.93	1790.46
chr12	25015074	25015506	433	*	8.54759	7.09506	9.25655	-2.10282	1.20778e-45	5.56327e-43	125.2	148.23	621.17	602.12
chr17	31790680	31791409	730	*	10.1364	9.44881	10.6002	-1.14234	1.64606e-45	7.56348e-43	712.69	684.98	1585.13	1519.42
chr9	83797292	83797872	581	*	9.77774	8.9846	10.2866	-1.28894	1.7339e-45	7.94762e-43	524.2	488.93	1234.67	1263.39
chr12	97272245	97273427	1183	*	10.2238	9.52693	10.6917	-1.15398	1.77408e-45	8.11197e-43	722.32	753.12	1728.54	1579.46
chr21	30723925	30724439	515	*	9.07725	7.99771	9.68778	-1.66021	1.81443e-45	8.27628e-43	251.78	259.41	821.33	828.13
chr15	79288952	79289759	808	*	10.7717	10.2244	11.1675	-0.936096	1.92126e-45	8.7423e-43	1162.59	1230.1	2337.44	2262.8
chr19	54973944	54976381	2438	*	12.5629	12.8313	12.2329	0.595682	2.25505e-45	1.02363e-42	7135.14	7440.37	4895.74	4731.31
chr12	26391839	26393230	1392	*	11.4373	11.0107	11.7661	-0.751242	2.42244e-45	1.09696e-42	2041.76	2084.83	3496.96	3468.8
chr6	43885706	43886238	533	*	8.20491	8.93975	6.6305	2.24753	2.77811e-45	1.25498e-42	460.91	521.21	96.63	101.53
chr6	28510196	28511109	914	*	9.92983	10.4014	9.22477	1.16579	2.88479e-45	1.30004e-42	1337.32	1367.57	598.93	597.7
chr1	228870714	228871783	1070	*	9.31993	9.89291	8.3553	1.51466	3.12484e-45	1.40485e-42	1008.5	892.99	315.95	339.02
chr10	85371635	85372292	658	*	9.09414	8.00565	9.70743	-1.67292	3.58046e-45	1.60583e-42	264.16	249.85	805.99	866.1
chr2	147867871	147868397	527	*	8.74687	7.30788	9.45278	-2.08557	3.71536e-45	1.66236e-42	137.58	179.31	756.14	645.38
chr8	90112974	90113605	632	*	9.30044	8.32701	9.87644	-1.52504	3.84311e-45	1.71542e-42	312.32	329.94	955.53	924.37
chr3	178099788	178100867	1080	*	9.38918	8.40765	9.96794	-1.53977	4.20131e-45	1.87085e-42	365.98	313.2	964.73	1038.26
chr1	115800260	115801310	1051	*	9.02401	7.92346	9.64099	-1.68792	5.3616e-45	2.38187e-42	247.65	237.89	789.88	806.94
chr17	30813196	30814712	1517	*	11.6266	11.9581	11.1956	0.757637	5.87135e-45	2.60216e-42	3970.69	3986.77	2445.57	2245.14
chrY	10037652	10038036	385	*	10.9553	11.3403	10.4287	0.905498	6.39215e-45	2.8263e-42	2704.92	2480.52	1346.64	1409.95
chr17	47807327	47808014	688	*	8.5752	7.17165	9.27298	-2.05539	6.98182e-45	3.07975e-42	156.85	131.5	621.94	615.36
chr8	6506365	6507072	708	*	8.4024	9.09827	7.007	2.04344	7.11971e-45	3.13321e-42	555.84	540.34	120.4	136.85
chr2	72766092	72766804	713	*	8.49416	7.04147	9.20315	-2.1105	7.4905e-45	3.28866e-42	140.34	123.13	588.19	590.64
chr8	127546225	127547080	856	*	9.74503	8.93906	10.2591	-1.30214	7.70787e-45	3.37619e-42	466.41	515.23	1220.1	1230.72
chr9	6096671	6097365	695	*	9.62929	8.73642	10.1767	-1.41625	8.45018e-45	3.69271e-42	387.99	465.02	1132.68	1182.16
chr4	37762238	37763085	848	*	8.90903	7.74998	9.54334	-1.76036	8.5293e-45	3.71862e-42	220.14	210.4	745.4	746.91
chr17	29897975	29898974	1000	*	11.6717	11.2706	11.9852	-0.711238	9.6804e-45	4.21068e-42	2454.51	2486.5	4125.03	3983.52
chrX	118109953	118111184	1232	*	10.5259	10.938	9.94672	0.982936	1.24301e-44	5.3942e-42	1961.96	1961.7	1023.78	949.97
chr22	30140632	30141659	1028	*	9.33406	8.39228	9.89908	-1.48546	1.36532e-44	5.91128e-42	338.46	333.53	963.2	946.44
chr2	39794475	39795110	636	*	9.24827	8.26515	9.82756	-1.5397	1.38089e-44	5.96185e-42	316.44	298.86	902.61	914.65
chr11	65657850	65659005	1156	*	11.7662	12.0852	11.3561	0.725044	1.38335e-44	5.96185e-42	4261	4429.08	2712.44	2530.31
chr14	84441968	84443026	1059	*	9.81298	8.9905	10.3336	-1.33124	1.50644e-44	6.47742e-42	555.84	461.44	1295.26	1285.46
chr3	50664719	50665517	799	*	11.8802	12.2138	11.4457	0.764802	1.59394e-44	6.83796e-42	4496.27	5004.08	2838.98	2739.55
chr5	34639994	34640806	813	*	8.48966	7.01631	9.20323	-2.12651	1.63299e-44	6.98949e-42	123.83	135.08	564.42	614.48
chr1	4665063	4666037	975	*	9.08998	7.99988	9.70377	-1.67075	1.71576e-44	7.32704e-42	239.4	272.56	857.37	810.48
chr5	180644107	180645547	1441	*	11.0135	11.3811	10.5191	0.855496	1.82445e-44	7.77347e-42	2709.04	2625.17	1515.35	1419.66
chr14	56165699	56166605	907	*	9.02198	7.93301	9.63542	-1.67247	1.94384e-44	8.26337e-42	244.9	243.87	801.39	789.29
chr6	147643	149039	1397	*	7.93513	8.71548	6.11121	2.50842	2.03239e-44	8.62028e-42	412.75	427.96	78.22	60.04
chr18	2049817	2051239	1423	*	10.2577	9.59903	10.7082	-1.09961	2.06767e-44	8.75013e-42	788.36	762.69	1618.11	1727.78
chr15	78385279	78386214	936	*	9.8617	9.10067	10.3573	-1.24105	2.23397e-44	9.43259e-42	524.2	573.81	1321.33	1302.24
chr2	205333343	205334434	1092	*	9.66672	8.85487	10.1831	-1.31299	2.53969e-44	1.06994e-41	470.54	455.46	1146.48	1178.63
chr1	180555734	180556489	756	*	9.48924	8.58	10.0426	-1.43941	2.78004e-44	1.16856e-41	357.72	407.64	1078.23	1031.19
chr15	42225992	42226363	372	*	9.52245	10.0581	8.66093	1.37958	3.50181e-44	1.46866e-41	1008.5	1123.71	414.88	394.64
chr6	36826146	36826971	826	*	10.4035	9.80033	10.8275	-1.02	3.96016e-44	1.65718e-41	909.43	873.86	1800.63	1833.72
chr16	10435335	10436388	1054	*	10.6185	10.0631	11.0185	-0.949228	4.24492e-44	1.77239e-41	1082.79	1056.76	2052.93	2095.94
chr12	110062639	110063570	932	*	8.94978	9.58212	7.7975	1.75139	5.0113e-44	2.08773e-41	696.18	836.8	227.76	217.19
chr3	124722184	124723021	838	*	9.7184	8.92369	10.2279	-1.28738	5.09446e-44	2.11767e-41	469.16	502.08	1198.63	1199.82
chr5	31366943	31367574	632	*	9.28435	8.25874	9.87775	-1.59773	5.32301e-44	2.20778e-41	341.21	271.36	932.52	949.09
chr8	12934963	12935443	481	*	8.91006	7.7373	9.5483	-1.77742	5.35735e-44	2.21712e-41	218.76	208.01	781.45	716.01
chr12	28659949	28661002	1054	*	8.63026	7.278	9.31581	-1.99082	5.48932e-44	2.26673e-41	160.97	149.43	608.9	665.69
chr14	21125321	21126038	718	*	7.54253	8.38364	5.28114	2.97053	5.66098e-44	2.33164e-41	326.08	341.89	34.51	43.26
chr7	47680235	47681052	818	*	9.37556	8.44445	9.9368	-1.46926	5.67139e-44	2.33164e-41	335.71	361.02	1002.31	957.92
chr2	224966480	224967376	897	*	9.05719	7.96214	9.67249	-1.67519	5.93553e-44	2.43489e-41	229.77	268.97	813.66	818.42
chr12	52566774	52568788	2015	*	9.88713	9.14838	10.3733	-1.21268	6.20878e-44	2.54142e-41	577.86	557.07	1302.92	1349.91
chr1	94992694	94994336	1643	*	10.6794	10.0752	11.104	-1.01775	6.58661e-44	2.69021e-41	1001.62	1155.98	2157.99	2244.26
chr14	85656518	85657500	983	*	9.35462	8.38257	9.93015	-1.51911	6.67882e-44	2.72194e-41	304.06	363.41	968.57	982.64
chr5	180614479	180615193	715	*	10.5634	10.9659	10.0032	0.956432	7.41997e-44	3.01743e-41	2036.25	1964.1	999.24	1053.27
chr13	40845844	40847238	1395	*	10.2027	9.55703	10.6472	-1.0809	8.73966e-44	3.54641e-41	749.84	756.71	1622.71	1584.75
chr11	26861445	26861908	464	*	8.19042	6.46605	8.95372	-2.40231	1.1296e-43	4.57384e-41	81.17	95.63	512.27	479.4
chr6	53630007	53630597	591	*	10.7708	10.2362	11.1599	-0.918441	1.28507e-43	5.19212e-41	1212.12	1200.21	2350.48	2225.72
chr7	148958508	148959872	1365	*	12.1166	12.3977	11.7672	0.628196	1.38659e-43	5.59025e-41	5279.13	5513.33	3454.78	3516.48
chr6	40925711	40926728	1018	*	10.3097	9.69456	10.7395	-1.03675	1.47629e-43	5.93911e-41	832.39	824.85	1704	1715.42
chr20	44061893	44062405	513	*	9.63599	8.79869	10.1624	-1.34397	1.68247e-43	6.7541e-41	419.63	471	1167.19	1124.78
chr2	227828033	227828823	791	*	9.46596	8.56186	10.0175	-1.43299	2.00468e-43	8.03037e-41	357.72	398.08	1068.26	1004.71
chr8	96758242	96758977	736	*	9.04902	7.98023	9.6562	-1.64636	2.03871e-43	8.14927e-41	250.4	254.63	829.76	783.99
chr10	17031932	17032411	480	*	9.35969	8.44263	9.91591	-1.45357	2.13581e-43	8.51923e-41	356.34	339.5	978.54	953.5
chr18	20254153	20255185	1033	*	10.3808	9.78152	10.803	-1.01328	2.18342e-43	8.69067e-41	879.17	881.03	1767.65	1805.47
chr1	201520926	201521735	810	*	10.224	10.6696	9.57596	1.08513	2.20928e-43	8.77495e-41	1550.58	1707.08	770.71	755.74
chr3	146108613	146109189	577	*	8.16243	6.36565	8.93826	-2.49096	2.4984e-43	9.90234e-41	90.81	74.12	523.78	457.33
chr5	14268295	14268791	497	*	10.0103	10.4634	9.34616	1.10758	2.54354e-43	1.006e-40	1404.74	1418.98	645.71	655.97
chr2	21690603	21691378	776	*	9.63436	8.82102	10.1513	-1.31369	2.74849e-43	1.08477e-40	452.65	451.87	1113.51	1160.98
chr14	83683661	83684372	712	*	9.32567	8.27532	9.92703	-1.62351	2.92294e-43	1.15119e-40	304.06	315.59	1060.59	886.4
chr14	54718727	54719565	839	*	10.5925	10.0393	10.9913	-0.944855	3.10146e-43	1.21895e-40	1044.27	1060.35	2016.12	2055.32
chr8	118823098	118824248	1151	*	10.9087	10.3987	11.2847	-0.879122	3.40795e-43	1.3366e-40	1298.8	1401.05	2512.29	2477.34
chr1	65089391	65090487	1097	*	9.70795	8.91613	10.2163	-1.28464	4.04547e-43	1.58333e-40	476.04	490.13	1220.87	1158.33
chr1	159309159	159309853	695	*	9.58372	8.74471	10.1108	-1.34598	4.52939e-43	1.76903e-40	407.25	450.68	1104.3	1107.12
chr5	88733664	88734336	673	*	9.7421	8.95766	10.2474	-1.27369	4.61586e-43	1.79905e-40	481.55	512.84	1245.41	1185.7
chr3	66412800	66413891	1092	*	10.4884	9.91667	10.8967	-0.972606	4.83039e-43	1.87876e-40	957.59	975.47	1914.89	1898.17
chr15	71983766	71985001	1236	*	9.40451	8.51148	9.95198	-1.41999	5.07214e-43	1.9687e-40	360.47	369.39	1005.38	975.57
chr20	353851	354508	658	*	9.21163	9.77221	8.2824	1.46912	5.20517e-43	2.01617e-40	847.52	901.36	307.52	315.19
chr2	166531955	166532616	662	*	8.22537	6.37018	9.0108	-2.53548	5.34198e-43	2.06489e-40	67.42	98.03	562.89	468.8
chr13	66979979	66980888	910	*	9.00739	7.8589	9.63863	-1.73954	6.10334e-43	2.35433e-40	213.26	251.04	754.61	839.61
chr11	9809348	9810126	779	*	8.16236	6.45627	8.92238	-2.38088	6.27488e-43	2.41553e-40	81.17	94.44	483.9	486.46
chr16	86831807	86832692	886	*	10.0995	9.36412	10.5843	-1.20591	6.64459e-43	2.55261e-40	624.63	693.35	1617.34	1453.21
chrX	4157959	4159326	1368	*	7.18228	8.12951	3.38313	4.60813	6.793e-43	2.60429e-40	260.04	300.05	13.8	7.06
chr16	1030735	1032524	1790	*	8.99497	9.58892	7.96765	1.5913	7.36497e-43	2.81781e-40	778.73	761.49	262.27	238.38
chr4	170820290	170821083	794	*	10.2545	9.5908	10.7073	-1.10426	7.58723e-43	2.89693e-40	748.46	793.77	1602.01	1741.91
chr8	17658297	17659438	1142	*	9.72769	10.2134	8.99017	1.20972	7.82272e-43	2.98078e-40	1187.36	1187.06	513.81	503.24
chr6	81076290	81076881	592	*	8.03123	6.0947	8.82928	-2.62063	8.12956e-43	3.09141e-40	57.79	78.9	476.23	433.49
chr5	30539148	30540016	869	*	9.40088	8.48147	9.95795	-1.45144	8.30468e-43	3.15161e-40	337.08	377.76	968.57	1020.6
chr4	113899780	113900438	659	*	9.81529	9.05753	10.3095	-1.23686	8.35334e-43	3.16367e-40	514.57	551.09	1296.79	1241.32
chr4	186950862	186951658	797	*	9.17328	8.16248	9.76183	-1.57539	8.77722e-43	3.31751e-40	304.06	268.97	848.17	888.17
chr15	39535541	39536119	579	*	8.80117	7.59442	9.44895	-1.81772	9.48483e-43	3.57775e-40	203.63	182.9	675.62	722.19
chr2	154242919	154243532	614	*	10.248	9.61526	10.6864	-1.06043	9.86261e-43	3.71278e-40	758.09	810.5	1646.48	1649.2
chr11	72447444	72448122	679	*	9.42264	9.97324	8.52107	1.42934	1.0253e-42	3.852e-40	972.72	1037.64	395.71	339.02
chr16	68639496	68640137	642	*	9.87272	9.13806	10.3572	-1.20467	1.09625e-42	4.11033e-40	543.46	583.37	1329	1294.29
chr5	159282509	159283348	840	*	9.28248	8.27264	9.87071	-1.56673	1.24839e-42	4.67143e-40	286.18	332.33	888.04	984.4
chr2	221924962	221925516	555	*	7.68625	5.23653	8.54778	-3.14537	1.27308e-42	4.7524e-40	37.15	38.25	375	373.45
chr14	105633853	105635712	1860	*	10.0635	10.5157	9.40132	1.10251	1.2751e-42	4.7524e-40	1498.3	1429.74	695.56	656.86
chr5	31364995	31365783	789	*	9.81819	9.07254	10.3073	-1.22146	1.28573e-42	4.78253e-40	544.84	531.97	1240.81	1293.41
chr2	74057920	74058608	689	*	10.459	9.88405	10.869	-0.978042	1.29098e-42	4.78334e-40	956.21	933.63	1858.14	1882.28
chr3	83114897	83115520	624	*	8.22188	6.59485	8.96711	-2.29997	1.29106e-42	4.78334e-40	97.69	95.63	515.34	485.58
chr9	110013881	110014659	779	*	8.17747	6.45237	8.9409	-2.40365	1.55144e-42	5.73671e-40	86.68	88.46	459.36	523.54
chr19	480017	480525	509	*	7.55522	8.42053	5.06737	3.18405	1.64967e-42	6.08793e-40	284.8	400.47	35.28	31.78
chr22	44317226	44317681	456	*	9.9481	10.408	9.26907	1.12806	1.85983e-42	6.85003e-40	1331.82	1385.51	626.54	607.42
chr16	58462665	58463379	715	*	9.22923	8.24277	9.80965	-1.53772	1.88892e-42	6.94352e-40	280.67	325.16	904.91	889.93
chr22	39705991	39707972	1982	*	10.9871	11.3588	10.4851	0.868687	1.90637e-42	6.99394e-40	2515.05	2737.54	1465.5	1401.12
chr11	128585515	128587186	1672	*	11.151	10.7003	11.4939	-0.788524	1.91608e-42	7.01583e-40	1638.63	1689.15	2887.29	2880.81
chr6	28677606	28678897	1292	*	8.64257	9.29177	7.43068	1.82042	1.97295e-42	7.20998e-40	661.78	591.74	170.25	174.81
chr4	134949076	134949844	769	*	9.00262	7.93354	9.60989	-1.64675	1.99527e-42	7.27739e-40	246.28	242.67	799.09	763.68
chr2	151245872	151246578	707	*	7.99924	5.99567	8.80711	-2.71349	2.1472e-42	7.81632e-40	79.8	47.82	457.06	438.79
chr4	138919767	138920315	549	*	8.36255	6.87028	9.08025	-2.15268	2.20037e-42	7.99433e-40	125.2	108.78	547.55	535.02
chr4	143394817	143396058	1242	*	10.4405	9.79481	10.885	-1.07914	2.34639e-42	8.50836e-40	839.27	937.22	1978.54	1803.71
chr6	144384788	144385931	1144	*	9.5628	10.0844	8.7378	1.32987	2.72524e-42	9.86306e-40	1133.7	1037.64	407.98	445.85
chr11	9796032	9797304	1273	*	10.4286	9.8198	10.8555	-1.02537	2.93361e-42	1.05967e-39	857.15	950.37	1884.22	1821.36
chr1	197290056	197290692	637	*	7.92314	5.92352	8.73045	-2.70119	3.20188e-42	1.15435e-39	68.79	52.6	413.35	436.14
chr20	48860971	48861322	352	*	7.65445	8.46954	5.59905	2.74285	3.3852e-42	1.2181e-39	374.23	334.72	53.68	43.26
chr2	43334037	43335075	1039	*	10.5486	9.90187	10.9936	-1.07904	3.3958e-42	1.21957e-39	870.91	1042.42	2090.51	1987.34
chr20	8744913	8745586	674	*	9.11954	8.10785	9.70838	-1.57525	3.67366e-42	1.31684e-39	287.55	264.19	822.09	851.09
chr1	215162604	215163099	496	*	8.64987	7.32989	9.32746	-1.95513	4.44913e-42	1.59177e-39	174.73	147.04	674.85	610.06
chr8	29744787	29745561	775	*	8.96091	7.87556	9.57324	-1.6644	4.67803e-42	1.67048e-39	227.01	242.67	772.25	751.32
chr4	178039689	178040207	519	*	7.80648	5.66242	8.63329	-2.84108	4.854e-42	1.73002e-39	52.28	49.01	388.04	406.12
chr5	97750605	97751206	602	*	10.0756	9.39456	10.5363	-1.12827	5.30571e-42	1.88742e-39	638.39	707.7	1481.61	1488.52
chr11	46384406	46385511	1106	*	10.5389	10.9284	10.0039	0.918208	6.35418e-42	2.25612e-39	1945.45	1952.14	1027.62	1025.9
chr1	212392981	212393658	678	*	9.87689	9.16154	10.353	-1.1788	8.55244e-42	3.03089e-39	575.1	570.22	1286.05	1329.6
chr1	61278525	61279099	575	*	8.88213	7.74839	9.50905	-1.72773	8.89038e-42	3.14471e-39	225.64	204.42	708.59	748.68
chr5	57742393	57743419	1027	*	9.07222	8.02327	9.67313	-1.61605	1.0226e-41	3.61034e-39	239.4	280.93	820.56	812.24
chr1	161368832	161370378	1547	*	11.3038	11.6348	10.8736	0.756388	1.07629e-41	3.79273e-39	3273.14	3086.61	1867.35	1884.93
chr12	132312737	132313239	503	*	9.0701	9.6619	8.0494	1.58241	1.20982e-41	4.25531e-39	777.35	842.78	285.28	244.56
chr11	78076210	78077051	842	*	10.4099	9.83436	10.8202	-0.97854	1.23467e-41	4.33457e-39	914.94	910.92	1816.73	1799.29
chr8	77419204	77419907	704	*	8.06689	6.25475	8.8453	-2.50015	1.25302e-41	4.39076e-39	79.8	72.92	490.8	429.08
chr12	43099617	43100100	484	*	9.10152	8.05512	9.70162	-1.61754	1.27563e-41	4.46166e-39	264.16	267.78	879.61	785.76
chr6	28770293	28770882	590	*	9.1779	9.74648	8.22598	1.49566	1.34132e-41	4.68269e-39	821.38	896.57	313.65	285.17
chr9	16521810	16522539	730	*	10.1266	9.45971	10.5809	-1.10814	1.35607e-41	4.72539e-39	665.91	742.36	1536.82	1526.48
chr3	31045453	31046226	774	*	9.34153	8.44608	9.88989	-1.42337	1.3625e-41	4.73399e-39	350.84	346.68	961.66	935.84
chr17	80193661	80194675	1015	*	10.726	11.1453	10.1323	1.00701	1.36359e-41	4.73399e-39	2092.66	2437.49	1106.6	1138.02
chr14	90526452	90527777	1326	*	9.54103	10.0552	8.73474	1.30606	1.37277e-41	4.75703e-39	1020.88	1106.97	414.11	437.9
chr8	103757265	103758253	989	*	11.0308	10.5257	11.4043	-0.870652	1.48032e-41	5.11305e-39	1388.23	1560.04	2685.6	2735.14
chr2	62794941	62795638	698	*	8.17693	6.53838	8.92438	-2.3052	1.48096e-41	5.11305e-39	86.68	99.22	480.83	490.88
chr14	51861953	51862576	624	*	10.5907	10.0331	10.9919	-0.950695	1.53052e-41	5.27443e-39	1011.25	1084.26	2075.94	1997.06
chr4	38212891	38213673	783	*	8.69256	7.44716	9.35085	-1.85764	1.58232e-41	5.44296e-39	163.73	185.29	670.25	635.67
chr19	1265346	1267223	1878	*	12.5428	12.8122	12.2112	0.598873	1.98967e-41	6.83165e-39	6945.28	7439.18	4672.58	4810.77
chr6	102113943	102114678	736	*	9.67423	8.87011	10.1875	-1.29786	2.07075e-41	7.09703e-39	436.14	499.69	1180.99	1151.26
chr4	180545838	180546879	1042	*	10.6934	10.1751	11.0739	-0.893467	2.09197e-41	7.15669e-39	1169.47	1142.83	2170.26	2140.96
chr3	107716364	107716859	496	*	8.39837	6.94745	9.10697	-2.10468	2.13859e-41	7.30283e-39	132.08	114.76	571.32	531.49
chr4	170645160	170646160	1001	*	9.26504	8.29405	9.8402	-1.52539	2.16339e-41	7.37411e-39	338.46	289.29	948.63	884.64
chr12	66392975	66393885	911	*	9.32863	8.43193	9.87745	-1.42555	2.35885e-41	8.02574e-39	353.59	337.11	940.96	940.26
chr4	15715706	15716642	937	*	9.99528	9.31114	10.4575	-1.1333	2.56221e-41	8.70186e-39	617.76	652.71	1381.91	1430.25
chr4	23820621	23821262	642	*	9.34097	8.43991	9.89139	-1.43254	2.61398e-41	8.86162e-39	364.6	329.94	948.63	950.85
chr3	159942983	159944084	1102	*	10.4779	10.8753	9.92772	0.941814	2.91731e-41	9.8721e-39	1865.65	1891.17	949.39	998.53
chr22	35245885	35246635	751	*	10.4503	9.81706	10.8889	-1.0659	3.1862e-41	1.07626e-38	976.85	827.24	1929.46	1862.86
chr1	16861157	16862169	1013	*	7.86231	8.65036	5.99064	2.55514	3.84167e-41	1.29533e-38	357.72	445.9	69.79	57.39
chr18	41446597	41447238	642	*	8.0374	6.26769	8.80864	-2.45385	4.63582e-41	1.5603e-38	81.17	72.92	462.43	434.37
chr16	84047392	84048288	897	*	9.62398	10.1213	8.85892	1.24949	5.09231e-41	1.71087e-38	1097.93	1129.68	444.79	483.81
chr4	106865695	106866214	520	*	7.97664	6.0622	8.77135	-2.59848	5.23033e-41	1.7541e-38	61.91	71.73	467.79	406.12
chr5	172308761	172309381	621	*	10.0986	10.5318	9.47649	1.04613	5.78031e-41	1.93508e-38	1466.65	1494.29	719.33	705.41
chr10	116398454	116399418	965	*	9.97769	9.29444	10.4395	-1.13554	6.08492e-41	2.03343e-38	652.15	603.69	1396.48	1380.81
chr10	78068781	78070331	1551	*	9.55083	8.7365	10.0682	-1.31663	6.1437e-41	2.04942e-38	443.02	410.03	1085.9	1061.21
chr8	142634891	142635645	755	*	8.66663	9.31666	7.45171	1.82628	6.7316e-41	2.24154e-38	581.98	693.35	171.78	178.34
chr8	75084371	75085048	678	*	8.39583	6.94468	9.10447	-2.10653	6.82479e-41	2.26854e-38	137.58	108.78	560.59	540.32
chr12	33041814	33042489	676	*	9.24253	8.30073	9.80756	-1.48353	7.0324e-41	2.33341e-38	315.07	315.59	927.92	864.33
chr12	110460862	110461464	603	*	8.69447	7.47339	9.34618	-1.8296	7.07211e-41	2.34244e-38	176.11	179.31	628.07	673.63
chr19	639370	640213	844	*	10.836	11.1947	10.3576	0.831441	7.26125e-41	2.40085e-38	2373.34	2314.36	1318.26	1305.77
chr22	24109827	24110804	978	*	9.91823	10.375	9.24596	1.11669	8.16338e-41	2.69437e-38	1346.95	1309	621.94	592.41
chr18	34992828	34993500	673	*	8.45342	7.08909	9.14189	-1.99935	8.56121e-41	2.82071e-38	134.83	137.47	573.62	556.21
chr3	187328772	187329651	880	*	8.71265	7.43855	9.37852	-1.89844	8.6274e-41	2.83754e-38	184.36	162.58	713.2	618.01
chr1	172137388	172137997	610	*	8.14109	6.48688	8.89152	-2.32054	9.77041e-41	3.20784e-38	82.55	96.83	485.43	464.39
chr10	93363668	93364455	788	*	7.91079	6.01568	8.70252	-2.58254	1.06153e-40	3.47916e-38	66.04	63.36	421.78	411.42
chr17	69544646	69545294	649	*	8.69202	7.46338	9.3458	-1.83591	1.10337e-40	3.60996e-38	166.48	186.49	630.37	670.98
chr12	50261339	50261740	402	*	9.47158	8.63272	9.99857	-1.3484	1.17571e-40	3.83994e-38	401.75	392.1	1048.32	997.64
chr3	8540817	8541207	391	*	9.24577	8.25113	9.82894	-1.54488	1.20442e-40	3.92688e-38	271.04	338.31	891.11	927.9
chr21	39159408	39160309	902	*	9.53603	8.70413	10.0603	-1.33639	1.23882e-40	4.03201e-38	399	435.14	1098.93	1036.49
chr11	26968840	26969450	611	*	10.4688	9.89703	10.8772	-0.971061	1.48021e-40	4.80932e-38	931.45	975.47	1833.6	1928.19
chr20	58834095	58834503	409	*	8.97004	7.90877	9.57486	-1.63169	1.51318e-40	4.90795e-38	228.39	252.24	749.24	776.04
chr8	70313185	70313931	747	*	9.22527	8.29125	9.78755	-1.47171	1.51913e-40	4.91873e-38	310.94	315.59	863.5	904.06
chr2	85832602	85833426	825	*	10.0073	9.34157	10.4611	-1.1075	1.59201e-40	5.14582e-38	632.89	664.66	1411.05	1408.18
chr4	84456565	84457894	1330	*	11.2074	11.5371	10.7792	0.752718	1.63919e-40	5.28918e-38	3007.6	2935.98	1791.42	1723.37
chr4	140631194	140631796	603	*	8.20964	6.62351	8.94684	-2.24574	1.70703e-40	5.49862e-38	90.81	106.39	508.44	478.52
chr4	157933786	157934437	652	*	9.18161	8.23609	9.74794	-1.48642	1.7158e-40	5.5174e-38	295.81	307.23	858.9	860.8
chr2	62155827	62156676	850	*	9.08576	8.08802	9.66997	-1.5572	1.81127e-40	5.81444e-38	284.8	259.41	826.69	802.53
chr6	27204897	27205504	608	*	7.67643	8.47805	5.71589	2.64641	1.86061e-40	5.9626e-38	387.99	325.16	52.15	52.97
chr5	91633308	91634094	787	*	8.64753	7.4172	9.30176	-1.83922	1.94371e-40	6.21829e-38	163.73	178.12	638.04	624.19
chr14	49972062	49972714	653	*	10.1887	9.57252	10.6191	-1.03691	2.10041e-40	6.70814e-38	755.34	767.47	1559.83	1585.64
chr4	175956208	175956937	730	*	8.89812	7.80558	9.51266	-1.67239	2.12215e-40	6.76604e-38	221.51	225.94	707.83	753.09
chr18	10265440	10266485	1046	*	7.77306	5.6034	8.6031	-2.87236	2.15906e-40	6.87203e-38	57.79	39.45	403.38	374.34
chr3	177796577	177797183	607	*	8.12114	6.47193	8.87061	-2.31795	2.16894e-40	6.89179e-38	86.68	90.85	482.37	453.8
chr12	6031207	6032196	990	*	7.17948	8.14235	2.88086	5.14741	2.24812e-40	7.13131e-38	243.52	321.57	7.67	7.06
chr4	150442704	150443532	829	*	9.85087	9.12095	10.3333	-1.19624	2.30125e-40	7.2875e-38	524.2	589.35	1304.46	1275.75
chr15	39880049	39881527	1479	*	9.35625	8.41691	9.92041	-1.47514	2.38588e-40	7.54276e-38	308.19	375.37	996.94	941.14
chr1	230561585	230562606	1022	*	10.2938	10.7133	9.69978	1.00663	2.46288e-40	7.77308e-38	1612.49	1745.33	823.63	839.61
chr12	46794195	46794932	738	*	8.82357	7.66097	9.4589	-1.76545	2.65415e-40	8.36268e-38	224.26	180.51	710.89	696.59
chr11	46413193	46414417	1225	*	10.777	11.1452	10.2816	0.857674	2.67525e-40	8.41499e-38	2325.18	2204.38	1227.77	1261.62
chr20	46905497	46906398	902	*	8.41734	7.02395	9.11273	-2.03087	2.78598e-40	8.74864e-38	125.2	135.08	571.32	535.9
chr4	184718146	184719784	1639	*	10.346	10.7809	9.7205	1.04828	3.02284e-40	9.47655e-38	1810.61	1708.27	898.01	789.29
chr16	66467458	66468172	715	*	9.66579	10.1626	8.90189	1.24517	3.06398e-40	9.58948e-38	1099.3	1193.04	498.47	458.21
chr2	223034025	223034731	707	*	9.13545	8.16288	9.71116	-1.52002	3.65626e-40	1.14241e-37	277.92	295.27	818.26	858.15
chr7	82488259	82489254	996	*	9.52497	8.71486	10.0406	-1.3069	3.99437e-40	1.24598e-37	410	430.36	1039.12	1067.39
chr8	82451774	82452635	862	*	9.85525	9.14365	10.3297	-1.17315	4.71549e-40	1.46847e-37	558.59	572.61	1323.63	1250.15
chr3	100673391	100674307	917	*	9.67388	8.92131	10.1659	-1.23008	4.94032e-40	1.53594e-37	484.3	485.35	1158.75	1138.9
chr7	101457317	101457792	476	*	9.51043	10.0138	8.73064	1.26879	4.99186e-40	1.54939e-37	1018.13	1049.59	412.58	437.02
chr5	169241110	169242228	1119	*	8.4464	6.98493	9.15735	-2.10112	5.02967e-40	1.55855e-37	108.69	144.65	539.88	602.12
chr8	103624271	103625231	961	*	8.73301	7.56465	9.36999	-1.76858	5.15027e-40	1.59329e-37	198.12	180.51	654.15	669.22
chr12	107805585	107805968	384	*	8.49846	9.15542	7.25804	1.84971	5.29289e-40	1.63471e-37	565.47	575	164.88	141.26
chr20	62853481	62854178	698	*	10.1202	9.47792	10.5631	-1.07338	5.99869e-40	1.84965e-37	683.8	742.36	1527.62	1498.23
chr12	133779603	133780839	1237	*	7.20137	8.10555	4.24139	3.66546	6.42375e-40	1.97746e-37	235.27	315.59	18.41	19.42
chr12	106354121	106355196	1076	*	8.55657	7.28521	9.22171	-1.89242	7.01021e-40	2.15446e-37	163.73	148.23	598.16	595.94
chr11	75097979	75098626	648	*	8.95536	7.90918	9.5554	-1.61727	7.11029e-40	2.18164e-37	247.65	233.11	767.64	737.2
chr4	124706590	124707169	580	*	9.72065	8.93154	10.2279	-1.27592	7.52458e-40	2.30498e-37	445.77	530.77	1204.76	1193.64
chr8	74498129	74498996	868	*	9.29475	8.36184	9.85663	-1.47553	8.00998e-40	2.44967e-37	359.1	298.86	944.03	910.24
chr3	8542321	8542718	398	*	9.13209	8.15639	9.70887	-1.52492	8.05145e-40	2.45834e-37	276.55	294.08	865.04	808.71
chr20	30266213	30267110	898	*	10.4421	9.84763	10.8619	-1.00313	8.24637e-40	2.51376e-37	861.28	981.45	1868.88	1853.15
chr11	27239566	27240592	1027	*	10.3287	9.7385	10.7464	-0.999252	8.57163e-40	2.60867e-37	858.53	849.95	1671.79	1763.98
chr21	40394833	40395777	945	*	10.9164	10.4474	11.2697	-0.817943	8.65217e-40	2.62891e-37	1414.37	1378.33	2491.58	2446.44
chr21	28743901	28745378	1478	*	9.14763	8.18233	9.72084	-1.51197	9.26941e-40	2.8119e-37	291.68	289.29	813.66	874.04
chr3	113666198	113667466	1269	*	10.6106	10.9884	10.0972	0.884128	9.3219e-40	2.82325e-37	2051.39	2011.91	1118.11	1072.69
chr3	85638129	85638802	674	*	9.48438	8.65408	10.008	-1.33693	9.49205e-40	2.87015e-37	410	395.69	1064.43	995
chr19	2478601	2480432	1832	*	11.3043	10.869	11.6382	-0.76407	1.05929e-39	3.19786e-37	1813.37	1927.04	3264.6	3110.36
chr13	80324085	80324896	812	*	9.95091	9.28456	10.405	-1.10928	1.09446e-39	3.29871e-37	623.26	624.02	1357.37	1354.32
chr13	45477591	45478359	769	*	10.9873	10.4712	11.3666	-0.886961	1.2108e-39	3.64353e-37	1320.81	1518.2	2675.63	2605.35
chr2	187636103	187637104	1002	*	8.52147	7.15199	9.21119	-2.00294	1.22139e-39	3.6695e-37	136.21	148.23	638.04	547.38
chr12	52645958	52648978	3021	*	10.1971	9.4773	10.6751	-1.1832	1.27227e-39	3.81624e-37	670.04	755.51	1751.55	1518.54
chr12	93048612	93049387	776	*	8.73092	7.56895	9.36607	-1.75815	1.36392e-39	4.08461e-37	188.49	191.27	677.92	641.85
chr1	17293536	17294451	916	*	10.3911	9.82669	10.7957	-0.962043	1.40657e-39	4.20564e-37	923.19	892.99	1763.82	1791.35
chr8	51517422	51518211	790	*	8.70138	7.46384	9.35756	-1.84418	1.41147e-39	4.21356e-37	158.22	194.86	682.52	629.49
chr13	63057556	63058358	803	*	8.79711	7.62078	9.43636	-1.78201	1.45865e-39	4.34657e-37	221.51	172.14	691.72	693.94
chr12	18748361	18749021	661	*	7.97993	6.22504	8.74861	-2.43052	1.46067e-39	4.34657e-37	74.3	75.31	435.59	424.66
chr11	106147647	106148727	1081	*	9.77428	9.04231	10.2576	-1.19895	1.4814e-39	4.40129e-37	502.18	552.29	1219.33	1228.96
chr4	57947197	57948140	944	*	10.9438	10.435	11.3193	-0.880229	1.48793e-39	4.41369e-37	1468.03	1300.63	2506.15	2604.47
chr19	44285049	44285642	594	*	9.54793	10.0481	8.77594	1.25637	1.52968e-39	4.53038e-37	1023.63	1093.82	449.39	427.31
chr21	43073913	43074548	636	*	9.69239	8.9266	10.19	-1.24479	1.9424e-39	5.74361e-37	456.78	516.43	1160.28	1175.98
chr5	111464711	111465577	867	*	8.03822	6.33977	8.79685	-2.37398	1.97305e-39	5.82507e-37	86.68	75.31	434.82	454.68
chr4	97085608	97086628	1021	*	10.6363	10.0929	11.0301	-0.932594	2.02021e-39	5.9549e-37	1140.58	1043.61	2146.49	2035.9
chr19	58098690	58099507	818	*	9.69315	8.92128	10.1933	-1.25393	2.06318e-39	6.07204e-37	456.78	512.84	1200.93	1140.67
chr10	134640200	134641192	993	*	7.28818	8.26515	2.30721	5.81234	2.22775e-39	6.54608e-37	316.44	298.86	4.6	5.3
chr3	172722488	172722937	450	*	7.92496	6.09922	8.70561	-2.50599	2.26931e-39	6.65777e-37	70.17	66.94	404.14	430.84
chr5	180600493	180601166	674	*	7.64443	8.43306	5.76911	2.5552	2.47671e-39	7.25489e-37	357.72	333.53	55.22	53.86
chr2	167228540	167229058	519	*	8.92483	7.87576	9.52578	-1.61926	2.55086e-39	7.46045e-37	236.65	233.11	753.84	720.42
chr13	29393522	29394726	1205	*	9.71095	10.1838	9.0029	1.16814	2.61328e-39	7.6311e-37	1139.2	1187.06	518.41	507.65
chr20	36315267	36316294	1028	*	9.30485	8.42266	9.84831	-1.40578	2.70526e-39	7.8874e-37	356.34	329.94	909.52	934.08
chr15	93344619	93345324	706	*	9.92765	9.25326	10.3854	-1.12191	2.79525e-39	8.13713e-37	628.76	591.74	1330.53	1344.61
chr1	78297704	78299049	1346	*	9.24627	8.29995	9.81289	-1.49088	2.93252e-39	8.52349e-37	339.83	290.49	866.57	932.31
chr2	183189225	183189893	669	*	8.48107	7.13276	9.16566	-1.97575	3.01262e-39	8.74274e-37	134.83	145.84	542.95	605.65
chr9	121295034	121295907	874	*	9.28572	8.39934	9.83073	-1.41113	3.30235e-39	9.56876e-37	345.34	329.94	928.69	892.58
chr1	185534161	185534926	766	*	9.77584	9.03091	10.2647	-1.21896	3.70804e-39	1.07277e-36	511.82	534.36	1285.29	1175.1
chr2	12402549	12403475	927	*	8.90866	7.85932	9.5097	-1.61896	3.817e-39	1.10223e-36	232.52	231.91	739.27	718.66
chr8	92192316	92193049	734	*	10.7495	10.2281	11.1317	-0.895227	3.82162e-39	1.10223e-36	1136.45	1262.38	2266.12	2221.3
chr8	69832453	69833701	1249	*	8.72836	7.49961	9.38217	-1.83648	3.87081e-39	1.1147e-36	180.24	181.71	615.04	719.54
chr7	101180143	101181071	929	*	10.373	10.7713	9.82092	0.944069	3.94332e-39	1.13384e-36	1741.82	1753.7	881.91	927.02
chr4	159223282	159224079	798	*	8.55154	7.18435	9.24072	-1.99638	4.24534e-39	1.21881e-36	130.71	160.19	651.08	558.86
chr8	80347797	80348593	797	*	8.3745	6.96722	9.07314	-2.05005	4.44049e-39	1.27289e-36	130.71	119.54	565.19	512.07
chr8	145742354	145743685	1332	*	11.2731	11.6142	10.8254	0.785467	4.46849e-39	1.27896e-36	2978.71	3291.03	1793.73	1835.49
chr16	3202284	3203108	825	*	10.4175	10.8081	9.88033	0.920724	4.49154e-39	1.28359e-36	1810.61	1775.22	939.42	945.56
chr5	123677722	123678469	748	*	8.38503	6.93899	9.09253	-2.08874	4.54186e-39	1.296e-36	121.07	124.32	503.84	587.99
chr3	115507709	115508336	628	*	10.5718	10.0326	10.9635	-0.925913	4.59855e-39	1.31018e-36	1088.3	1006.55	2029.16	1964.39
chr21	44445203	44446362	1160	*	9.64746	8.89086	10.1412	-1.23701	5.03908e-39	1.43351e-36	493.93	455.46	1125.01	1133.61
chr20	36535683	36536656	974	*	10.2336	9.6246	10.6605	-1.02801	5.56698e-39	1.58129e-36	799.37	779.42	1671.02	1566.21
chr17	39602794	39603532	739	*	8.26104	6.77024	8.97841	-2.13851	5.93003e-39	1.68187e-36	105.94	112.37	480.83	527.96
chr12	101437959	101438798	840	*	8.69873	7.48579	9.34822	-1.82441	6.36699e-39	1.80307e-36	199.5	158.99	633.44	670.1
chr2	165738758	165739385	628	*	8.67366	7.47805	9.31834	-1.80271	6.81419e-39	1.9268e-36	193.99	162.58	634.97	641.85
chr18	8306289	8306969	681	*	7.82946	5.88743	8.62834	-2.61933	6.90134e-39	1.94851e-36	55.03	63.36	382.67	408.77
chr2	168800244	168800816	573	*	7.829	5.86387	8.63131	-2.63868	7.47501e-39	2.1073e-36	49.53	66.94	401.08	391.99
chr18	13217146	13218232	1087	*	9.25266	9.78645	8.39612	1.37192	7.6078e-39	2.14152e-36	861.28	904.94	325.92	347.85
chr2	45662232	45662945	714	*	10.0155	9.37342	10.4583	-1.0752	7.73751e-39	2.17476e-36	671.41	655.1	1417.96	1395.82
chr14	39022760	39023660	901	*	9.97679	9.325	10.4241	-1.08829	7.89253e-39	2.21501e-36	638.39	644.34	1386.51	1361.39
chr6	27513317	27513837	521	*	7.38857	8.24893	4.95031	3.10023	8.26038e-39	2.31478e-36	309.57	298.86	40.64	21.19
chr16	776805	778898	2094	*	11.5521	11.8543	11.1693	0.680729	8.66844e-39	2.42551e-36	3669.38	3735.73	2364.28	2241.61
chr12	52599872	52600625	754	*	9.08639	8.11843	9.66052	-1.51655	9.01559e-39	2.51888e-36	282.05	273.75	832.83	785.76
chr15	58820083	58821411	1329	*	8.80874	7.7161	9.42331	-1.67171	9.10344e-39	2.53964e-36	207.75	212.79	692.49	680.69
chr2	186483183	186483869	687	*	9.47213	8.64602	9.99414	-1.33038	9.18545e-39	2.55872e-36	403.12	398.08	1060.59	979.1
chr2	86564097	86565178	1082	*	9.23184	9.77173	8.3592	1.38957	9.76017e-39	2.71478e-36	861.28	887.01	345.09	311.65
chr14	21121027	21121583	557	*	8.64574	9.26568	7.5354	1.69613	9.94306e-39	2.76155e-36	599.87	631.19	179.45	191.58
chr8	578991	579474	484	*	7.10648	8.07027	2.77209	5.22751	1.0285e-38	2.85229e-36	261.41	276.14	3.07	10.59
chr2	1735087	1736379	1293	*	11.6343	11.2653	11.9279	-0.658784	1.20664e-38	3.34132e-36	2433.87	2488.89	3942.51	3850.2
chr8	143896778	143898087	1310	*	11.2969	10.8394	11.6438	-0.797216	1.2084e-38	3.34132e-36	1717.06	1947.36	3188.67	3211
chr14	32699262	32700474	1213	*	9.9765	9.32292	10.4247	-1.09058	1.23907e-38	3.42108e-36	642.52	638.36	1350.47	1398.47
chr1	106821173	106821791	619	*	8.8625	7.77908	9.47423	-1.65731	1.48045e-38	4.0815e-36	205	234.3	722.4	700.12
chr8	94869634	94870380	747	*	9.66969	8.86474	10.1833	-1.3049	1.48433e-38	4.08621e-36	500.81	431.55	1220.1	1105.36
chr17	70172894	70173806	913	*	9.17217	8.21604	9.74221	-1.49721	1.52074e-38	4.1803e-36	277.92	316.79	886.51	826.37
chr6	159284500	159285422	923	*	10.1655	9.46709	10.634	-1.15153	1.54479e-38	4.24019e-36	648.02	767.47	1664.12	1514.12
chr16	87119172	87120588	1417	*	9.97172	9.24248	10.4538	-1.19383	1.66304e-38	4.55809e-36	550.34	661.07	1446.33	1358.74
chr13	45496351	45496958	608	*	10.6781	10.1703	11.0529	-0.875457	1.78095e-38	4.87413e-36	1119.94	1184.67	2150.32	2098.59
chr5	155567675	155568224	550	*	7.54621	5.09851	8.40753	-3.11837	1.98338e-38	5.42024e-36	30.27	38.25	348.93	330.19
chrX	13002630	13003457	828	*	9.4269	8.5845	9.95525	-1.34752	2.11837e-38	5.78072e-36	357.72	410.03	993.11	992.35
chr4	95810738	95811546	809	*	9.24631	8.33267	9.8013	-1.44701	2.25506e-38	6.14479e-36	331.58	313.2	932.52	851.97
chr6	8180384	8181032	649	*	8.85099	7.76808	9.46257	-1.66005	2.30427e-38	6.26974e-36	216.01	219.96	733.9	677.16
chr14	69093538	69094446	909	*	11.184	10.7558	11.5138	-0.752377	2.31114e-38	6.27934e-36	1693.67	1764.46	2876.56	2971.75
chr5	71697658	71698798	1141	*	7.81868	5.88302	8.6166	-2.60858	2.4448e-38	6.63288e-36	52.28	65.75	384.21	400.82
chr4	146657472	146658147	676	*	10.5372	10.0114	10.9217	-0.902668	2.69856e-38	7.31076e-36	1009.87	1054.37	1942.5	1937.02
chr2	113058620	113059261	642	*	9.08145	8.11814	9.65398	-1.51163	2.85032e-38	7.71076e-36	290.3	265.39	822.86	788.4
chr1	167076565	167077082	518	*	8.64624	7.44818	9.29161	-1.80111	2.91145e-38	7.86479e-36	174.73	174.53	655.68	597.7
chr12	68018702	68019320	619	*	8.19624	6.67855	8.91937	-2.17544	2.97303e-38	8.01957e-36	112.82	92.05	473.93	494.41
chr16	576762	578404	1643	*	12.2675	12.54	11.9312	0.605318	3.02688e-38	8.1531e-36	5814.33	6096.71	4024.57	3785.75
chr10	92689884	92691555	1672	*	11.318	10.9135	11.6335	-0.715611	3.03278e-38	8.15728e-36	1905.55	1952.14	3220.88	3133.31
chr2	225128151	225128803	653	*	9.06281	8.0745	9.64385	-1.54523	3.06755e-38	8.23897e-36	291.68	247.45	809.82	790.17
chr1	230645177	230646129	953	*	9.99951	9.31776	10.4606	-1.12737	3.19246e-38	8.5622e-36	598.49	677.81	1370.41	1447.91
chr13	30475881	30477069	1189	*	10.3027	9.73348	10.7098	-0.967716	3.24101e-38	8.67998e-36	840.64	861.91	1675.63	1673.92
chr1	145092223	145092973	751	*	10.9863	10.5265	11.3345	-0.804421	3.4178e-38	9.14041e-36	1520.31	1429.74	2627.32	2537.37
chr14	58544203	58545506	1304	*	10.8478	10.3632	11.2099	-0.839756	3.91177e-38	1.04465e-35	1290.54	1343.67	2305.23	2432.31
chr14	37532596	37533496	901	*	8.3994	7.05769	9.08238	-1.96722	3.92969e-38	1.04795e-35	126.58	139.87	554.45	529.72
chr3	144961591	144962376	786	*	8.94119	7.90246	9.53884	-1.60063	3.96972e-38	1.05712e-35	221.51	257.02	746.94	740.73
chr15	35982861	35983666	806	*	9.08816	8.13768	9.65624	-1.49075	4.06901e-38	1.08202e-35	275.17	288.1	794.48	819.3
chr6	122127224	122127692	469	*	7.61952	5.23177	8.47465	-3.04591	4.12348e-38	1.09495e-35	26.14	49.01	362.73	348.73
chr2	192484799	192485391	593	*	8.33375	6.85068	9.04945	-2.14165	4.32836e-38	1.14773e-35	137.58	93.24	535.28	524.43
chr14	45251843	45252581	739	*	8.67078	7.48761	9.31197	-1.77765	4.63529e-38	1.22738e-35	166.48	192.46	619.64	651.56
chr11	1569404	1569966	563	*	9.58017	10.0641	8.84678	1.20152	4.68849e-38	1.23972e-35	1093.8	1047.2	467.03	453.8
chr2	11235	11983	749	*	7.79161	8.55283	6.07884	2.37699	4.79211e-38	1.26533e-35	367.35	383.73	75.15	60.04
chr14	104653562	104654279	718	*	7.6025	8.3934	5.7127	2.56804	5.40951e-38	1.42635e-35	315.07	357.43	53.68	51.21
chr11	115330213	115330702	490	*	8.83425	7.74293	9.44841	-1.67046	5.43927e-38	1.43218e-35	213.26	215.18	731.6	665.69
chr11	119995666	119996041	376	*	8.45037	9.10398	7.22234	1.83238	5.49357e-38	1.44445e-35	543.46	557.07	161.81	136.85
chr22	17048455	17049083	629	*	7.00314	7.95599	3.04417	4.79273	5.76828e-38	1.51455e-35	268.29	228.33	7.67	8.83
chr11	121902623	121903887	1265	*	8.31418	6.93194	9.00694	-2.01571	6.17051e-38	1.6179e-35	121.07	123.13	516.88	512.07
chr19	9185861	9186751	891	*	10.9946	10.5427	11.3382	-0.791195	6.32297e-38	1.65556e-35	1528.57	1454.84	2549.87	2628.31
chr8	104281205	104281841	637	*	8.81803	7.71587	9.43551	-1.67941	6.41313e-38	1.67682e-35	198.12	222.35	667.95	716.89
chr19	12893187	12894040	854	*	10.3031	10.7102	9.73375	0.966685	6.55363e-38	1.71117e-35	1703.3	1647.31	882.68	820.19
chr7	92545844	92546883	1040	*	9.84807	9.16197	10.3111	-1.13483	6.66983e-38	1.73846e-35	550.34	595.33	1272.25	1268.69
chr11	117699079	117700211	1133	*	8.67909	9.28941	7.60025	1.65224	6.6767e-38	1.73846e-35	637.02	614.45	200.92	187.17
chr22	27745090	27745798	709	*	8.14735	6.59299	8.87811	-2.20411	6.76026e-38	1.75778e-35	86.68	106.39	479.3	461.74
chr18	28807463	28808168	706	*	7.86033	6.02495	8.64255	-2.50989	6.8087e-38	1.76792e-35	63.29	66.94	412.58	386.7
chr19	7179274	7179979	706	*	8.23909	6.75284	8.95547	-2.14187	7.31894e-38	1.89778e-35	122.45	93.24	498.47	494.41
chr16	19359811	19360709	899	*	10.0401	9.41351	10.4755	-1.05237	7.48453e-38	1.93804e-35	692.05	671.83	1411.05	1436.43
chr1	7764089	7765270	1182	*	11.39	11.6975	10.9987	0.695254	7.79729e-38	2.01624e-35	3240.12	3402.2	2059.83	2032.37
chr2	165399025	165399756	732	*	8.44288	7.15656	9.11191	-1.90468	7.86229e-38	2.03025e-35	143.09	142.26	552.15	554.44
chr18	35599096	35599926	831	*	8.48639	7.22156	9.14982	-1.87687	8.06467e-38	2.07964e-35	143.09	155.41	567.49	568.57
chr1	193377876	193378492	617	*	8.91296	7.88199	9.50809	-1.59455	8.34808e-38	2.14977e-35	233.89	237.89	750.01	706.3
chr12	41408128	41408905	778	*	9.38535	8.5556	9.90879	-1.33339	8.72121e-38	2.24277e-35	378.36	374.17	936.36	986.17
chr1	162874298	162874880	583	*	8.62041	7.44398	9.25969	-1.7739	9.20968e-38	2.36515e-35	176.11	172.14	603.53	622.42
chr9	437163	438589	1427	*	9.897	9.21946	10.3562	-1.12217	9.33241e-38	2.39339e-35	568.22	624.02	1299.86	1321.66
chr5	126404366	126405059	694	*	9.03247	7.99446	9.62988	-1.60005	9.68725e-38	2.47847e-35	233.89	276.14	835.9	748.68
chr2	85359964	85361201	1238	*	10.7243	11.083	10.2458	0.831504	9.69059e-38	2.47847e-35	2209.61	2129.07	1198.63	1229.84
chr20	23133004	23133469	466	*	10.435	10.8593	9.83142	1.0175	1.01268e-37	2.58651e-35	1787.23	1928.23	975.47	846.67
chr3	154684884	154685386	503	*	8.42646	7.10052	9.10554	-1.95666	1.01422e-37	2.58691e-35	151.34	123.13	555.22	546.5
chr2	101846945	101847575	631	*	8.53979	7.27664	9.20278	-1.88237	1.03444e-37	2.63489e-35	167.85	142.26	613.5	565.04
chr12	3424316	3425076	761	*	10.6565	10.1606	11.0248	-0.857666	1.07871e-37	2.74393e-35	1129.57	1159.57	2084.37	2082.69
chr7	83960801	83961546	746	*	8.06921	6.48015	8.80699	-2.24499	1.09783e-37	2.7888e-35	85.3	93.24	451.69	444.08
chr8	50617027	50617954	928	*	8.97388	7.96129	9.56302	-1.5691	1.11962e-37	2.8403e-35	236.65	261.8	779.15	733.67
chr5	148767467	148768003	537	*	8.37142	7.02894	9.05459	-1.96989	1.23863e-37	3.13388e-35	132.08	129.11	516.11	547.38
chr7	51027688	51028100	413	*	8.65683	7.48279	9.29543	-1.76708	1.23869e-37	3.13388e-35	166.48	191.27	639.58	617.13
chr1	144007818	144008640	823	*	9.41735	8.50987	9.9701	-1.43023	1.28471e-37	3.24466e-35	317.82	411.23	991.57	1014.42
chr5	66563614	66564877	1264	*	9.51127	8.72593	10.0169	-1.27418	1.28594e-37	3.24466e-35	432.02	414.82	1009.21	1062.98
chr14	52006093	52006845	753	*	10.4102	9.85038	10.8126	-0.95374	1.39317e-37	3.5105e-35	924.57	921.68	1738.51	1858.44
chr7	134426681	134427906	1226	*	9.50751	8.71567	10.0158	-1.28114	1.45769e-37	3.66814e-35	404.5	436.33	1060.59	1010.01
chr8	74480271	74480877	607	*	9.50342	8.71919	10.0086	-1.27259	1.61189e-37	4.05074e-35	429.26	413.62	1006.14	1054.15
chr5	149109420	149111825	2406	*	11.1904	11.5045	10.7883	0.711974	1.84011e-37	4.61805e-35	2915.42	2895.34	1760.75	1776.34
chr11	125642448	125643305	858	*	8.77643	7.63231	9.4064	-1.73797	1.87782e-37	4.70641e-35	209.13	187.68	722.4	634.78
chr11	61684513	61685516	1004	*	9.708	10.183	8.99507	1.17563	1.97469e-37	4.94258e-35	1102.05	1222.93	508.44	512.07
chr14	21093392	21094060	669	*	8.79846	9.39487	7.76356	1.59945	1.98199e-37	4.95423e-35	704.43	641.95	208.59	226.02
chr12	94202	95323	1122	*	7.23556	8.08592	4.89217	3.02327	2.0185e-37	5.03878e-35	269.67	273.75	27.61	31.78
chr22	46820466	46821463	998	*	8.76949	7.68418	9.3818	-1.66333	2.1582e-37	5.38035e-35	210.5	200.83	675.62	658.62
chr9	107572665	107573698	1034	*	10.8881	10.4314	11.2345	-0.797205	2.24184e-37	5.58143e-35	1360.71	1401.05	2391.12	2427.9
chrY	7637875	7638573	699	*	7.82636	5.97099	8.61182	-2.5315	2.41292e-37	5.9994e-35	63.29	62.16	407.21	375.22
chr12	461395	462141	747	*	9.2736	8.32858	9.83976	-1.48102	2.54685e-37	6.324e-35	290.3	352.65	963.96	868.75
chr12	39401444	39401969	526	*	7.91616	6.142	8.68815	-2.44751	2.63346e-37	6.53041e-35	74.3	66.94	388.81	436.14
chr6	26758060	26758751	692	*	8.73184	9.33662	7.6707	1.63086	2.73205e-37	6.76597e-35	681.04	612.06	200.92	206.59
chr3	111487254	111488127	874	*	10.6219	10.1012	11.0036	-0.893634	2.82749e-37	6.99308e-35	1045.64	1151.2	2048.33	2057.97
chr2	231535832	231536228	397	*	9.33796	8.40256	9.90073	-1.46629	2.94548e-37	7.2753e-35	293.06	383.73	966.26	945.56
chr3	166173218	166174401	1184	*	8.65189	7.49583	9.28533	-1.75132	3.05539e-37	7.53683e-35	191.24	169.75	615.8	632.14
chr17	6413735	6414171	437	*	9.18561	9.76584	8.1997	1.53899	3.15549e-37	7.77354e-35	770.47	970.69	297.55	290.46
chr12	46917776	46919008	1233	*	11.2821	10.8792	11.5966	-0.714196	3.18964e-37	7.84736e-35	1924.81	1842.16	3118.89	3075.04
chr11	92065931	92066763	833	*	9.17044	8.23247	9.73412	-1.47162	3.23645e-37	7.95208e-35	275.17	326.35	868.1	835.2
chr9	130346054	130346819	766	*	9.25528	8.38247	9.79523	-1.3883	3.31186e-37	8.12672e-35	321.95	345.48	871.17	905.83
chr7	126892777	126894286	1510	*	11.0795	11.4047	10.6589	0.742151	3.35905e-37	8.23173e-35	2662.26	2760.25	1602.77	1630.66
chr2	10674737	10675280	544	*	9.11503	9.67344	8.19187	1.45775	3.61671e-37	8.85158e-35	758.09	875.06	295.25	289.58
chr3	109420961	109421669	709	*	9.17866	8.27716	9.72923	-1.4301	3.64727e-37	8.91474e-35	319.2	301.25	871.17	826.37
chr7	80146479	80147104	626	*	8.03951	6.35833	8.79498	-2.35527	3.88005e-37	9.47136e-35	93.56	70.53	471.63	416.72
chr3	48807197	48807886	690	*	9.28871	8.44099	9.81912	-1.3563	3.89857e-37	9.5042e-35	341.21	353.85	902.61	904.06
chr8	99090291	99091251	961	*	7.60616	5.41186	8.43925	-2.86464	3.92533e-37	9.557e-35	38.52	46.62	336.66	357.56
chr22	45094624	45095357	734	*	10.4294	9.8917	10.8203	-0.920962	4.24229e-37	1.03153e-34	950.71	949.17	1774.55	1841.67
chr2	218415860	218416699	840	*	10.5447	10.0174	10.93	-0.903784	4.28365e-37	1.04024e-34	993.36	1079.48	1939.43	1962.62
chr11	115118047	115118583	537	*	8.12353	6.55647	8.85689	-2.22774	4.52131e-37	1.09653e-34	104.56	83.68	441.72	485.58
chr5	14038494	14039070	577	*	10.2412	9.65868	10.655	-0.98899	4.66548e-37	1.13004e-34	822.76	793.77	1653.39	1571.51
chr13	97767381	97768101	721	*	9.65966	8.93064	10.1417	-1.19831	4.79758e-37	1.16053e-34	504.94	471	1149.55	1109.77
chr1	208063508	208064364	857	*	9.84161	9.16956	10.2983	-1.11519	4.80586e-37	1.16104e-34	559.97	591.74	1257.68	1260.74
chr22	18155041	18156256	1216	*	10.3502	9.80022	10.7475	-0.939235	4.86086e-37	1.17281e-34	890.17	892.99	1696.33	1741.91
chr4	156626760	156627287	528	*	8.76816	7.66113	9.38711	-1.68831	5.37494e-37	1.29518e-34	206.38	198.44	637.27	701.88
chr12	46553879	46554915	1037	*	9.44324	8.62083	9.9638	-1.32293	5.60479e-37	1.34883e-34	397.62	389.71	950.16	1047.09
chr20	48900384	48901147	764	*	8.94638	9.53356	7.93973	1.56217	5.62028e-37	1.35083e-34	692.05	790.18	261.51	229.55
chr4	48333593	48334317	725	*	9.394	9.89754	8.61386	1.26782	5.66934e-37	1.36087e-34	954.84	952.76	376.54	407
chr11	108942365	108943177	813	*	8.38895	7.07673	9.06458	-1.93744	5.94464e-37	1.42513e-34	144.46	125.52	531.45	539.43
chr20	39317625	39318955	1331	*	8.17704	8.87101	6.78972	2.01546	6.13695e-37	1.46936e-34	495.3	441.11	118.87	102.41
chr6	146678590	146680321	1732	*	10.9573	10.5006	11.3036	-0.799465	6.16944e-37	1.47525e-34	1492.79	1404.63	2579.01	2476.45
chr10	50813585	50813979	395	*	8.44589	7.03541	9.14527	-2.03626	6.26929e-37	1.49722e-34	104.56	157.8	573.62	558.86
chr4	79214436	79215585	1150	*	9.96402	9.30508	10.4147	-1.09584	7.06319e-37	1.68467e-34	613.63	651.51	1318.26	1411.71
chr5	57185168	57185834	667	*	10.8566	10.3935	11.2067	-0.806696	7.63347e-37	1.81838e-34	1307.05	1383.12	2369.65	2357.27
chr12	56113740	56114284	545	*	10.7961	10.304	11.1623	-0.850621	7.89543e-37	1.87839e-34	1203.87	1324.54	2323.64	2260.15
chr4	138915995	138916391	397	*	8.05344	6.44398	8.79526	-2.26747	8.359e-37	1.98616e-34	88.05	86.07	417.95	470.57
chr11	29206561	29207656	1096	*	9.96772	9.31923	10.4135	-1.08427	8.4387e-37	2.00256e-34	663.16	614.45	1332.83	1394.94
chr17	73680901	73681437	537	*	10.1583	9.54307	10.5882	-1.03281	8.96798e-37	2.12547e-34	703.06	788.99	1556.76	1522.07
chr16	88840399	88840717	319	*	9.47241	10.007	8.61367	1.36862	9.06044e-37	2.14467e-34	998.86	1059.15	435.59	347.85
chr4	11075009	11075817	809	*	9.60244	8.84595	10.0962	-1.23188	9.31363e-37	2.20182e-34	436.14	484.15	1117.34	1071.81
chr11	130455274	130455980	707	*	10.0844	9.47696	10.5106	-1.02273	9.40206e-37	2.21993e-34	694.8	730.41	1454.77	1462.92
chr17	38460081	38461139	1059	*	9.41366	8.59291	9.93356	-1.31783	1.05345e-36	2.48418e-34	364.6	407.64	955.53	1000.29
chr10	35310513	35310803	291	*	6.93965	7.86065	3.70951	3.94023	1.08727e-36	2.56072e-34	244.9	219.96	13.8	12.36
chr1	67019346	67020024	679	*	9.58487	8.76614	10.104	-1.31315	1.2163e-36	2.86101e-34	386.61	484.15	1091.27	1109.77
chr8	32954908	32955396	489	*	8.39359	6.95048	9.10043	-2.07535	1.30892e-36	3.07501e-34	108.69	138.67	499.24	598.59
chr2	30584988	30585990	1003	*	10.4583	9.93204	10.8431	-0.904896	1.31067e-36	3.07528e-34	987.86	965.91	1865.81	1808.12
chr3	123396742	123397671	930	*	10.9669	10.5029	11.3174	-0.808566	1.32661e-36	3.10879e-34	1410.24	1491.9	2631.92	2472.04
chr4	1580697	1581667	971	*	10.9192	11.2523	10.4855	0.762294	1.33205e-36	3.11762e-34	2417.36	2461.4	1431.76	1435.55
chr11	66623272	66624981	1710	*	11.8322	12.1077	11.4914	0.612061	1.37532e-36	3.21489e-34	4522.41	4304.75	2882.69	2875.51
chr3	43795093	43796151	1059	*	10.271	10.6849	9.68838	0.990054	1.41571e-36	3.30518e-34	1586.35	1705.88	787.58	862.57
chr20	30398077	30398491	415	*	8.96776	9.55244	7.9686	1.54913	1.44327e-36	3.36532e-34	749.84	751.93	277.61	223.37
chr17	63214053	63215040	988	*	8.26639	6.87389	8.96157	-2.02315	1.4942e-36	3.47975e-34	111.44	123.13	511.51	485.58
chr14	84014260	84014998	739	*	8.84625	7.77337	9.45471	-1.64197	1.5017e-36	3.48625e-34	200.87	236.7	726.23	677.16
chr9	82225846	82226506	661	*	9.68734	8.9593	10.1689	-1.19263	1.50253e-36	3.48625e-34	471.92	523.6	1174.09	1128.31
chr5	115879076	115879674	599	*	8.30105	6.85533	9.00848	-2.07789	1.50257e-36	3.48625e-34	97.69	133.89	532.98	497.06
chr5	13306396	13307155	760	*	7.63317	5.56371	8.45018	-2.74463	1.52084e-36	3.52429e-34	46.78	47.82	354.3	345.2
chr5	20601502	20602327	826	*	9.76632	9.06369	10.2368	-1.15977	1.54575e-36	3.57759e-34	531.08	539.14	1252.31	1160.98
chr11	24017088	24017898	811	*	7.96027	6.19582	8.7306	-2.42183	1.6005e-36	3.69974e-34	60.54	86.07	401.08	448.5
chr5	134794489	134795149	661	*	9.03945	8.09416	9.6057	-1.48529	1.60465e-36	3.70257e-34	275.17	271.36	799.85	758.39
chr9	130717599	130718451	853	*	10.4652	10.8419	9.95412	0.882115	1.60568e-36	3.70257e-34	1802.36	1868.46	980.07	1003.82
chr1	244255129	244256191	1063	*	9.92132	9.24374	10.3805	-1.12305	1.64802e-36	3.79555e-34	604	608.48	1267.65	1398.47
chr2	221640372	221641193	822	*	8.73216	7.55854	9.37065	-1.77466	1.6657e-36	3.83157e-34	213.26	163.77	632.67	691.29
chr6	39850037	39851004	968	*	10.0847	9.43105	10.5328	-1.08726	1.73919e-36	3.9957e-34	637.02	743.56	1511.51	1451.44
chr2	13663117	13663983	867	*	9.49381	8.72969	9.99072	-1.24485	1.84613e-36	4.2362e-34	430.64	418.4	1010.74	1024.13
chr14	78266261	78267143	883	*	11.3095	11.6195	10.9141	0.702139	1.86858e-36	4.27882e-34	3055.76	3237.23	1919.49	1939.67
chr4	185667445	185668642	1198	*	9.80371	9.13386	10.2594	-1.11356	1.86927e-36	4.27882e-34	564.1	559.46	1233.91	1217.48
chr1	209562312	209563124	813	*	10.8967	10.4484	11.2382	-0.784042	1.8852e-36	4.30956e-34	1373.1	1421.37	2420.26	2411.12
chr5	67095513	67096438	926	*	8.55261	7.33595	9.20312	-1.81638	1.8873e-36	4.30956e-34	148.59	174.53	605.83	572.98
chr15	79461284	79461894	611	*	9.95814	9.31875	10.3996	-1.07126	1.90291e-36	4.33992e-34	650.78	626.41	1382.68	1319.01
chr18	74903129	74903852	724	*	8.33596	7.01367	9.01413	-1.94481	1.94508e-36	4.43071e-34	129.33	129.11	523.78	510.3
chr8	35184611	35185478	868	*	9.61643	8.88818	10.0981	-1.19388	1.98529e-36	4.51682e-34	462.28	485.35	1103.54	1088.58
chr15	39721950	39722690	741	*	9.08252	8.12951	9.65147	-1.49014	2.01114e-36	4.5701e-34	260.04	300.05	782.98	825.48
chr15	88609679	88610497	819	*	9.40997	8.51295	9.9589	-1.41686	2.03732e-36	4.62397e-34	320.57	410.03	1029.92	960.56
chr2	53732894	53733528	635	*	9.19087	8.31229	9.73297	-1.39577	2.18018e-36	4.94224e-34	308.19	327.55	842.03	859.92
chr9	96896797	96897925	1129	*	8.95784	7.97733	9.53625	-1.52989	2.38548e-36	5.4011e-34	251.78	252.24	764.58	720.42
chr9	97853712	97855286	1575	*	11.8561	11.5114	12.1341	-0.618429	2.39742e-36	5.42159e-34	2843.88	2994.56	4554.48	4435.55
chr1	183256271	183256954	684	*	8.69448	7.54301	9.3266	-1.73886	2.54604e-36	5.75074e-34	173.36	199.64	674.08	610.06
chr6	119064984	119066094	1111	*	9.27298	8.40323	9.81177	-1.38239	2.5752e-36	5.80961e-34	313.69	363.41	904.91	892.58
chr5	172141749	172142380	632	*	11.1807	11.5028	10.7654	0.732784	2.60826e-36	5.87711e-34	2837	2967.06	1786.06	1695.11
chr9	20980804	20981972	1169	*	9.61677	8.88419	10.1003	-1.20206	2.88579e-36	6.49466e-34	478.79	466.22	1128.08	1067.39
chr1	204873409	204874024	616	*	8.17103	6.6019	8.90481	-2.21785	2.93645e-36	6.60075e-34	86.68	107.59	520.71	437.9
chr4	72199646	72200670	1025	*	9.86458	9.1931	10.321	-1.11372	2.96182e-36	6.64981e-34	558.59	612.06	1302.92	1255.44
chr11	133987800	133988448	649	*	9.41449	8.61623	9.92541	-1.2918	2.97587e-36	6.67336e-34	405.87	378.95	952.46	992.35
chr3	174667144	174667776	633	*	9.20525	8.21572	9.78671	-1.53564	3.17597e-36	7.11356e-34	258.66	335.92	928.69	837.85
chr1	115770018	115771121	1104	*	9.52528	8.74217	10.03	-1.27381	3.50231e-36	7.83514e-34	459.53	396.88	1065.19	1025.9
chr10	64342496	64343288	793	*	9.52181	8.7496	10.0221	-1.25838	3.53971e-36	7.90937e-34	456.78	404.06	1053.69	1025.9
chr10	45430857	45431562	706	*	10.6138	10.0984	10.9928	-0.887558	3.55535e-36	7.93486e-34	1077.29	1115.34	2111.21	1964.39
chr13	44359795	44360562	768	*	7.01216	7.9047	4.21184	3.46813	3.67647e-36	8.19543e-34	254.53	224.74	17.64	19.42
chr2	133030353	133031080	728	*	9.01597	9.59042	8.04704	1.51186	3.71003e-36	8.26041e-34	836.52	705.31	267.64	261.33
chr9	72500238	72501213	976	*	10.3791	9.83472	10.7734	-0.92967	3.76234e-36	8.36694e-34	881.92	944.39	1762.28	1738.37
chr4	167342403	167343319	917	*	9.34516	8.52147	9.86621	-1.32232	4.05372e-36	9.00425e-34	353.59	381.34	914.88	951.74
chr6	43883796	43884913	1118	*	9.18338	8.3108	9.72323	-1.38883	4.09907e-36	9.09421e-34	312.32	322.77	853.53	836.96
chr5	28301661	28302312	652	*	9.26345	8.40146	9.79932	-1.37231	4.34302e-36	9.62406e-34	316.44	359.83	890.34	891.7
chr14	94940788	94941651	864	*	9.6146	8.845	10.1138	-1.24823	4.38827e-36	9.71284e-34	422.39	497.3	1131.91	1084.17
chr10	133467692	133468484	793	*	7.06264	8.03485	2.35069	5.48221	4.46087e-36	9.8619e-34	253.16	271.36	8.44	1.77
chr3	32130800	32131572	773	*	8.72577	7.61979	9.34439	-1.68263	5.14487e-36	1.13607e-33	182.99	210.4	667.95	632.14
chr17	13424008	13424807	800	*	9.27362	8.38193	9.8206	-1.41036	5.39849e-36	1.19067e-33	310.94	356.24	861.2	947.32
chr6	11277209	11278017	809	*	9.92927	9.2982	10.3668	-1.0579	5.40783e-36	1.19132e-33	631.51	627.6	1317.49	1323.42
chr6	27124992	27126237	1246	*	9.50814	9.99973	8.75669	1.22479	5.56925e-36	1.22544e-33	1074.54	973.08	438.65	426.43
chr9	2809479	2810905	1427	*	10.5899	10.0984	10.9558	-0.851183	5.71221e-36	1.25443e-33	1095.17	1097.41	1987.75	1984.7
chr20	669488	670363	876	*	7.78349	8.52907	6.15466	2.28661	5.71438e-36	1.25443e-33	346.71	392.1	73.62	68.86
chr4	48256179	48257007	829	*	10.1835	9.60472	10.5955	-0.981276	5.83127e-36	1.2786e-33	762.22	794.96	1569.8	1524.72
chr9	124051341	124052245	905	*	10.777	10.314	11.127	-0.807449	5.90057e-36	1.29228e-33	1264.4	1281.5	2263.82	2208.94
chr2	39923157	39923709	553	*	9.78728	9.06976	10.2643	-1.17623	5.9284e-36	1.29686e-33	492.55	582.18	1236.97	1222.78
chr5	66579282	66580229	948	*	9.47987	8.70175	9.98258	-1.26049	6.31833e-36	1.38055e-33	397.62	435.14	993.11	1030.31
chr6	112526551	112527544	994	*	10.1353	9.54682	10.5521	-0.997144	6.34757e-36	1.38532e-33	769.1	726.82	1487.74	1515.01
chr5	31106345	31107653	1309	*	9.04178	8.10046	9.60664	-1.47825	6.39314e-36	1.39364e-33	275.17	273.75	752.31	806.94
chr1	173393830	173394491	662	*	9.31842	8.39117	9.8783	-1.46535	7.00167e-36	1.52453e-33	361.85	309.62	1015.35	866.98
chr6	53625849	53626299	451	*	8.58079	7.3869	9.225	-1.79521	7.08815e-36	1.54156e-33	173.36	161.38	632.67	564.15
chr6	52416130	52417418	1289	*	11.2677	10.8697	11.5793	-0.70422	7.24242e-36	1.57329e-33	1836.76	1905.52	3019.19	3100.64
chr7	138425448	138426635	1188	*	9.93301	9.29887	10.372	-1.06153	7.25735e-36	1.57471e-33	617.76	641.95	1342.03	1308.42
chr1	205460813	205461824	1012	*	9.32185	8.48774	9.84698	-1.3366	7.57095e-36	1.64086e-33	342.59	375.37	944.03	897.88
chr9	18189846	18190459	614	*	8.10618	6.594	8.82813	-2.16503	7.605e-36	1.64633e-33	105.94	87.27	469.33	439.67
chr1	230986830	230987482	653	*	9.62657	8.87618	10.1177	-1.22258	7.70898e-36	1.66692e-33	438.9	500.89	1138.81	1083.28
chr2	178862464	178863255	792	*	10.0292	9.41436	10.459	-1.03277	7.87931e-36	1.70178e-33	661.78	702.91	1391.11	1424.07
chr6	53516035	53517155	1121	*	11.3558	11.6899	10.9203	0.76546	8.13575e-36	1.75515e-33	3110.79	3496.64	1973.17	1902.59
chr4	77777254	77777982	729	*	8.12845	6.66707	8.83937	-2.10163	8.17116e-36	1.76076e-33	100.44	102.81	463.19	452.91
chrX	1499581	1500594	1014	*	7.83849	8.57053	6.27791	2.21648	8.48318e-36	1.8259e-33	374.23	386.12	71.32	83.87
chr9	84705715	84707095	1381	*	9.10158	8.17902	9.65977	-1.45188	8.60455e-36	1.8499e-33	272.42	307.23	826.69	791.05
chr20	24653088	24654134	1047	*	11.3559	10.9749	11.657	-0.67766	8.76973e-36	1.88325e-33	1990.85	2034.63	3253.86	3204.82
chr8	38258982	38259588	607	*	9.43618	8.65182	9.94145	-1.27184	9.8216e-36	2.10672e-33	400.37	404.06	1013.04	953.5
chr11	110582349	110583885	1537	*	11.2787	11.5871	10.8859	0.697797	1.05553e-35	2.26151e-33	2992.47	3160.72	1881.15	1903.47
chr12	53229474	53230331	858	*	8.34181	9.0243	7.00208	1.95695	1.11214e-35	2.38008e-33	511.82	529.58	149.54	106.83
chr19	4707933	4708564	632	*	9.00217	8.0165	9.58233	-1.53613	1.12053e-35	2.3953e-33	257.28	260.6	813.66	719.54
chr13	106250838	106251338	501	*	8.40558	7.13253	9.07117	-1.89085	1.13088e-35	2.41468e-33	152.72	127.91	539.88	535.9
chr21	42512920	42513541	622	*	9.70542	8.96569	10.192	-1.20846	1.18126e-35	2.51938e-33	469.16	530.77	1220.1	1119.48
chr18	2212190	2213205	1016	*	7.37002	4.71261	8.2509	-3.31802	1.21865e-35	2.59617e-33	26.14	26.3	320.55	288.7
chr19	39156327	39157280	954	*	10.8538	10.403	11.1968	-0.789062	1.26555e-35	2.69303e-33	1378.6	1329.32	2319.8	2374.92
chr9	139024995	139025673	679	*	8.7277	9.31954	7.70687	1.57788	1.26741e-35	2.69392e-33	628.76	649.12	220.09	197.76
chr14	63160593	63161300	708	*	10.5979	10.1068	10.9636	-0.85151	1.30837e-35	2.77784e-33	1119.94	1085.45	2019.95	1974.1
chr6	19301852	19302695	844	*	10.0205	9.34338	10.4796	-1.12416	1.35815e-35	2.88026e-33	645.27	653.9	1526.85	1328.72
chr6	3929339	3930072	734	*	9.48878	8.67015	10.0078	-1.3186	1.37025e-35	2.90264e-33	405.87	408.84	1101.24	957.92
chr7	97915384	97915824	441	*	9.65374	10.1246	8.95013	1.15955	1.38375e-35	2.92792e-33	1082.79	1150.01	516.88	472.34
chr1	113066753	113067455	703	*	11.028	10.5832	11.3675	-0.777113	1.39348e-35	2.94518e-33	1465.28	1603.08	2619.65	2664.51
chr3	99751997	99752493	497	*	8.11058	6.5375	8.84516	-2.22797	1.39763e-35	2.95063e-33	94.93	90.85	503.07	416.72
chr6	110093989	110094907	919	*	8.28518	6.92874	8.97175	-1.97948	1.50853e-35	3.18118e-33	116.95	126.72	482.37	521.78
chr6	27543699	27544270	572	*	6.90506	7.84807	3.2146	4.46001	1.56241e-35	3.29109e-33	205	255.82	11.5	7.06
chr14	91112215	91113009	795	*	10.2668	9.71565	10.6647	-0.941794	1.56893e-35	3.30114e-33	854.4	827.24	1627.31	1619.19
chr2	241173696	241174393	698	*	10.4055	9.87258	10.7937	-0.913051	1.58664e-35	3.33465e-33	914.94	959.93	1807.53	1742.79
chr16	27455218	27455889	672	*	9.72427	9.04332	10.185	-1.12918	1.58867e-35	3.33517e-33	535.2	520.01	1161.05	1167.16
chr8	96756419	96757098	680	*	8.77177	7.73141	9.36994	-1.60454	1.64242e-35	3.44415e-33	214.63	210.4	660.28	663.04
chr3	140247865	140248704	840	*	10.1168	9.50949	10.5428	-1.02536	1.66765e-35	3.49316e-33	751.21	706.5	1544.49	1439.08
chr17	79533399	79534278	880	*	11.0051	10.5618	11.3437	-0.775028	1.70697e-35	3.57154e-33	1447.39	1575.58	2588.98	2608.89
chr1	113069918	113070591	674	*	9.67365	8.9638	10.1473	-1.16717	1.75347e-35	3.66474e-33	477.42	521.21	1149.55	1118.6
chr3	60010742	60011809	1068	*	7.96417	6.23242	8.72878	-2.38425	1.79117e-35	3.73935e-33	61.91	88.46	396.48	452.03
chr3	31212401	31213206	806	*	10.2179	9.63159	10.6336	-0.990355	1.87799e-35	3.91624e-33	748.46	838	1594.34	1582.99
chr3	171975396	171977248	1853	*	9.85513	9.20998	10.2993	-1.07823	1.90925e-35	3.977e-33	599.87	584.57	1251.54	1268.69
chr18	51942703	51943232	530	*	8.44759	7.18379	9.11075	-1.8712	1.99644e-35	4.15401e-33	138.96	151.82	523.01	582.7
chr11	5757632	5758791	1160	*	10.5938	10.0873	10.9679	-0.873708	2.00546e-35	4.1652e-33	1067.66	1108.17	2064.43	1941.43
chr9	117781037	117781609	573	*	9.28779	8.41272	9.82858	-1.39666	2.00775e-35	4.1652e-33	365.98	315.59	952.46	866.1
chr3	50191858	50193065	1208	*	11.2488	11.5529	10.863	0.685078	2.00848e-35	4.1652e-33	3013.11	2995.75	1890.35	1834.61
chr11	632872	633636	765	*	9.54793	8.81576	10.0313	-1.19926	2.07465e-35	4.29767e-33	445.77	455.46	1041.42	1051.5
chr11	65307636	65308679	1044	*	11.5016	11.7883	11.1435	0.64105	2.11679e-35	4.38013e-33	3485.02	3588.69	2279.16	2245.14
chr2	212273087	212273753	667	*	10.0475	9.4448	10.4714	-1.01826	2.18711e-35	4.52063e-33	719.57	674.22	1423.32	1416.13
chrX	10990811	10991425	615	*	7.32542	4.34578	8.23094	-3.68163	2.21092e-35	4.56482e-33	27.52	13.15	288.35	312.54
chr2	87642006	87642995	990	*	6.90004	7.85652	2.8275	4.91897	2.28297e-35	4.70838e-33	225.64	237.89	5.37	8.83
chr15	74101966	74102848	883	*	8.73199	9.33375	7.68039	1.61693	2.32993e-35	4.79997e-33	606.75	683.79	217.79	192.47
chr3	20679024	20679625	602	*	8.30553	6.98467	8.98333	-1.94161	2.456e-35	5.05413e-33	126.58	126.72	522.24	489.99
chr2	122827585	122828597	1013	*	10.0486	9.44375	10.4735	-1.02159	2.48557e-35	5.10937e-33	720.94	671.83	1437.13	1406.41
chr14	74077357	74077790	434	*	8.65668	7.55482	9.27406	-1.6824	2.49517e-35	5.12348e-33	196.75	179.31	615.8	622.42
chr2	216473757	216474474	718	*	9.5233	8.76968	10.0158	-1.23131	2.49974e-35	5.12725e-33	448.53	424.38	1066.73	1003.82
chr3	159058537	159059476	940	*	7.96924	6.38017	8.70702	-2.24391	2.58116e-35	5.28848e-33	85.3	81.29	427.92	407.89
chr1	59833057	59833950	894	*	9.08767	8.19032	9.63672	-1.42056	2.59728e-35	5.31568e-33	288.93	295.27	786.05	806.06
chr21	28942261	28943263	1003	*	11.028	10.5893	11.364	-0.771368	2.70245e-35	5.5249e-33	1600.11	1481.14	2681	2590.35
chr20	49639310	49640096	787	*	9.93654	10.3709	9.31222	1.04662	2.98936e-35	6.10481e-33	1307.05	1341.28	664.88	606.53
chr3	133281962	133283100	1139	*	8.5954	7.4479	9.22636	-1.73213	3.00367e-35	6.12735e-33	165.1	184.1	584.36	613.6
chr6	26305495	26305878	384	*	7.89428	8.64566	6.23499	2.31034	3.12968e-35	6.37374e-33	374.23	426.77	89.72	60.92
chr9	75169080	75169585	506	*	8.22303	6.84758	8.91417	-2.00445	3.13125e-35	6.37374e-33	115.57	114.76	496.94	467.92
chr1	210566769	210568162	1394	*	10.8088	10.3393	11.1624	-0.81595	3.1819e-35	6.46981e-33	1243.77	1347.25	2322.1	2261.92
chr19	1468745	1471124	2380	*	11.5297	11.8283	11.1527	0.671403	3.24548e-35	6.59194e-33	3534.55	3738.12	2338.21	2215.12
chr7	138368989	138369648	660	*	8.66712	7.47541	9.31072	-1.7956	3.2968e-35	6.68893e-33	198.12	157.8	679.45	590.64
chr12	123325769	123326556	788	*	9.05935	9.62642	8.11174	1.48474	3.3744e-35	6.83899e-33	741.58	839.19	299.85	253.38
chr11	59333259	59334055	797	*	10.3897	10.788	9.83764	0.943184	3.43843e-35	6.96123e-33	1814.74	1721.42	865.04	964.98
chr4	149847782	149848422	641	*	8.54044	7.37313	9.17712	-1.75717	3.5657e-35	7.2111e-33	158.22	173.34	587.43	570.34
chr1	183183301	183184398	1098	*	8.3322	7.01568	9.00892	-1.93602	3.59762e-35	7.26782e-33	132.08	126.72	490.03	540.32
chr5	56729934	56730622	689	*	8.90564	7.82788	9.51562	-1.64286	3.70403e-35	7.47473e-33	192.62	261.8	734.67	729.25
chr5	67635623	67636192	570	*	8.91207	7.94144	9.4871	-1.51423	3.85052e-35	7.76198e-33	239.4	252.24	713.96	721.31
chr13	49159526	49160021	496	*	8.3244	7.03553	8.99408	-1.90395	4.23094e-35	8.51969e-33	132.08	130.3	513.04	506.77
chr3	20600235	20600824	590	*	8.05863	6.52589	8.78492	-2.18531	4.40706e-35	8.8648e-33	101.81	82.48	424.85	457.33
chr3	39234787	39235524	738	*	9.78899	9.11006	10.2488	-1.12345	4.43745e-35	8.91638e-33	524.2	580.98	1235.44	1198.06
chr18	20263095	20264058	964	*	10.9984	10.5664	11.3304	-0.758185	4.65136e-35	9.33619e-33	1476.28	1556.45	2612.75	2537.37
chr11	79847771	79848812	1042	*	9.62739	8.83812	10.1347	-1.27339	4.65956e-35	9.34263e-33	407.25	508.06	1151.85	1096.53
chr2	228019578	228020506	929	*	9.60492	8.89329	10.0793	-1.17194	4.67109e-35	9.35575e-33	478.79	472.2	1098.17	1065.63
chr3	23670584	23671526	943	*	9.34292	8.53728	9.85681	-1.30233	4.76666e-35	9.53698e-33	387.99	355.04	942.49	912.01
chr14	47454790	47455635	846	*	8.73841	7.67895	9.34266	-1.63074	4.93527e-35	9.8638e-33	217.38	192.46	654.91	643.61
chr1	198122278	198122645	368	*	9.12701	8.24293	9.67116	-1.4019	5.17082e-35	1.03236e-32	290.3	315.59	823.63	806.94
chr22	37055640	37056871	1232	*	11.0296	11.3565	10.6063	0.745801	5.46209e-35	1.08935e-32	2542.57	2701.68	1579.77	1537.96
chr3	189776202	189777354	1153	*	9.98442	9.37438	10.4118	-1.02639	5.57469e-35	1.11062e-32	650.78	676.61	1371.18	1353.44
chr1	2292027	2292860	834	*	8.97773	8.02732	9.54578	-1.49303	5.94634e-35	1.18341e-32	277.92	243.87	746.17	748.68
chr3	177332735	177333258	524	*	8.78881	7.72858	9.3933	-1.63051	5.98119e-35	1.18908e-32	217.38	206.81	710.13	634.78
chr6	107682926	107683695	770	*	9.64298	8.94303	10.1122	-1.15478	6.26932e-35	1.24504e-32	487.05	497.3	1124.24	1089.46
chrX	29437641	29438465	825	*	9.35397	8.55845	9.86377	-1.28581	6.90944e-35	1.37072e-32	371.48	382.54	953.23	910.24
chr7	80802985	80803748	764	*	8.51929	7.34077	9.15917	-1.77011	6.96021e-35	1.37933e-32	156.85	167.36	553.69	589.76
chr11	25059014	25060297	1284	*	7.91749	6.266	8.6674	-2.30957	7.39197e-35	1.46334e-32	79.8	74.12	384.97	428.19
chr22	17041022	17042126	1105	*	7.02353	7.99485	2.35706	5.53601	7.78569e-35	1.53966e-32	253.16	257.02	2.3	7.95
chr7	70708796	70709702	907	*	9.06775	8.09821	9.64241	-1.50894	8.6156e-35	1.70198e-32	250.4	297.66	756.14	842.26
chr3	39850329	39851824	1496	*	10.4556	10.8286	9.95123	0.871304	9.08531e-35	1.79289e-32	1763.84	1873.24	994.64	985.28
chr1	9938	10721	784	*	7.45397	8.25273	5.5128	2.61852	9.14215e-35	1.80068e-32	294.43	315.59	38.34	52.97
chr2	217578304	217579505	1202	*	10.5641	10.0772	10.9274	-0.843425	9.14399e-35	1.80068e-32	1070.41	1090.23	1945.57	1949.38
chr12	6037053	6037616	564	*	7.37358	8.35967	1.67061	6.41341	9.1878e-35	1.8074e-32	315.07	341.89	4.6	1.77
chr5	151073378	151074047	670	*	10.5161	9.94263	10.9253	-0.970754	1.0633e-34	2.08951e-32	897.05	1071.11	1982.38	1907
chr12	46798128	46798553	426	*	8.19107	6.79228	8.88773	-2.03542	1.07586e-34	2.11197e-32	122.45	99.22	478.53	468.8
chr2	40223720	40224269	550	*	8.93777	7.97422	9.51037	-1.50526	1.12528e-34	2.20668e-32	243.52	259.41	752.31	706.3
chr14	40882229	40882744	516	*	8.91586	7.95232	9.48846	-1.50836	1.15034e-34	2.25346e-32	258.66	236.7	710.89	725.72
chr15	66239457	66240144	688	*	8.42752	7.21204	9.0777	-1.81889	1.18464e-34	2.31823e-32	155.47	141.06	536.81	543.85
chr11	36384348	36385534	1187	*	10.821	10.3742	11.1617	-0.782677	1.21185e-34	2.369e-32	1335.95	1318.56	2325.17	2256.62
chr2	211717745	211718394	650	*	7.72151	5.83167	8.51242	-2.5478	1.30307e-34	2.54469e-32	48.15	65.75	378.07	352.27
chr6	37212463	37212999	537	*	10.835	10.3694	11.1864	-0.809261	1.31841e-34	2.57196e-32	1258.9	1386.7	2327.47	2333.43
chr1	95663245	95663990	746	*	9.06297	8.16288	9.61303	-1.42253	1.37203e-34	2.67378e-32	277.92	295.27	770.71	795.47
chr20	10905146	10905890	745	*	8.6961	7.61474	9.30719	-1.65009	1.38633e-34	2.69884e-32	181.61	210.4	635.74	631.25
chr16	31397511	31398221	711	*	8.2029	8.87802	6.89276	1.92578	1.48749e-34	2.89277e-32	438.9	502.08	127.3	110.36
chr15	62359735	62360994	1260	*	9.41514	9.93927	8.58362	1.33006	1.52623e-34	2.96503e-32	998.86	964.71	425.62	341.67
chr5	17381221	17381786	566	*	8.91272	7.92854	9.49237	-1.52832	1.5609e-34	3.02924e-32	224.26	263	720.1	720.42
chr10	113986358	113986724	367	*	7.857	6.12229	8.62213	-2.39372	1.56687e-34	3.03769e-32	68.79	70.53	364.27	423.78
chr14	54465662	54466288	627	*	10.1834	9.62411	10.5854	-0.952906	1.62255e-34	3.14239e-32	795.24	783.01	1519.18	1553.85
chr14	62082568	62083582	1015	*	9.85158	9.1814	10.3074	-1.11599	1.74324e-34	3.37264e-32	623.26	537.94	1251.54	1282.81
chr3	25520443	25521453	1011	*	8.63591	7.54117	9.25111	-1.66831	1.84436e-34	3.5646e-32	178.86	193.66	616.57	602.12
chr1	203954122	203954889	768	*	7.9389	6.28886	8.68854	-2.31482	1.87657e-34	3.62311e-32	89.43	66.94	434.05	391.11
chr15	39288248	39289035	788	*	9.34681	8.56039	9.85292	-1.27236	1.89197e-34	3.64909e-32	370.1	384.93	917.18	932.31
chr4	180484745	180485302	558	*	8.22535	6.86652	8.91251	-1.98125	1.99796e-34	3.84956e-32	111.44	121.93	498.47	465.27
chr6	81478802	81479302	501	*	7.94629	6.35297	8.68492	-2.24375	2.06741e-34	3.97928e-32	79.8	83.68	430.22	392.88
chr10	106694677	106695141	465	*	8.15678	6.76591	8.85158	-2.02068	2.08526e-34	4.00952e-32	110.07	107.59	470.1	453.8
chr19	57813194	57813913	720	*	9.15825	8.27962	9.70037	-1.3953	2.09101e-34	4.01645e-32	299.93	321.57	865.8	798.12
chr7	115665205	115666040	836	*	8.42727	7.20765	9.0786	-1.82045	2.13158e-34	4.09019e-32	148.59	147.04	520.71	560.62
chr21	28480442	28481010	569	*	8.58065	7.45283	9.20582	-1.70746	2.17733e-34	4.1737e-32	165.1	185.29	591.26	589.76
chr3	171358225	171358931	707	*	9.39692	8.59535	9.90917	-1.29006	2.26494e-34	4.33721e-32	356.34	417.21	956.3	966.74
chr8	33181347	33181866	520	*	8.7806	7.74027	9.37875	-1.59862	2.33592e-34	4.46857e-32	198.12	229.52	653.38	678.05
chr5	156984779	156985955	1177	*	10.1556	9.59048	10.5606	-0.961106	2.36854e-34	4.52635e-32	773.23	768.66	1486.97	1533.55
chr1	154377468	154379007	1540	*	11.7962	12.0743	11.4514	0.61841	2.38904e-34	4.56088e-32	4265.13	4359.74	2895.73	2705.12
chr7	95488643	95489217	575	*	10.1789	9.54993	10.6155	-1.05199	2.42924e-34	4.63291e-32	693.43	805.72	1634.98	1502.65
chr8	52580069	52580789	721	*	10.5416	10.0544	10.9051	-0.844225	2.49061e-34	4.74511e-32	1058.03	1068.72	1931.76	1903.47
chr1	177895626	177896733	1108	*	10.8771	10.444	11.2097	-0.760104	2.52332e-34	4.80256e-32	1381.35	1404.63	2356.61	2380.22
chr8	127500331	127501134	804	*	10.2399	9.68726	10.6386	-0.943894	2.56944e-34	4.88537e-32	832.39	816.48	1632.68	1555.62
chr3	111528140	111528716	577	*	8.275	6.96722	8.94951	-1.9263	2.58139e-34	4.90312e-32	130.71	119.54	484.67	504.12
chr11	110850126	110851021	896	*	9.25774	8.38656	9.79708	-1.38152	2.60732e-34	4.94737e-32	299.93	369.39	891.11	888.17
chr6	98116541	98117826	1286	*	9.84266	9.175	10.2973	-1.11269	2.67486e-34	5.07038e-32	620.51	535.55	1263.05	1253.68
chr1	212623570	212624327	758	*	8.94544	8.00596	9.50965	-1.47452	2.68152e-34	5.07787e-32	255.91	258.21	716.26	741.61
chr13	50161397	50161921	525	*	9.19889	8.35704	9.72703	-1.34568	2.76746e-34	5.23534e-32	315.07	340.7	847.4	847.56
chr10	85451758	85452462	705	*	7.98625	6.4583	8.71154	-2.17538	2.8571e-34	5.39945e-32	92.18	83.68	416.41	422.01
chr3	127541108	127542490	1383	*	10.4918	10.859	9.99808	0.855637	2.888e-34	5.45237e-32	1807.86	1906.71	1006.14	1039.14
chr6	26312686	26313656	971	*	10.2375	10.6238	9.70844	0.90798	2.95324e-34	5.56993e-32	1584.98	1570.8	827.46	845.79
chr1	173476212	173477295	1084	*	11.0177	10.597	11.343	-0.741224	3.0308e-34	5.71045e-32	1571.22	1526.57	2546.8	2648.61
chr18	10234956	10235881	926	*	9.04352	8.08173	9.61552	-1.49823	3.03526e-34	5.71311e-32	239.4	302.44	793.72	775.16
chr7	68428382	68429454	1073	*	10.1135	9.54091	10.5224	-0.972332	3.25748e-34	6.12523e-32	749.84	739.97	1448.63	1492.94
chr2	23746984	23747636	653	*	9.55808	10.0334	8.84442	1.17348	3.30794e-34	6.21389e-32	1005.74	1090.23	477	442.32
chr21	44495085	44496949	1865	*	9.96518	10.38	9.38065	0.989301	3.33563e-34	6.25962e-32	1344.2	1320.95	671.02	662.15
chr19	38526133	38527617	1485	*	11.754	11.4015	12.0371	-0.63124	3.33946e-34	6.26056e-32	2643	2767.43	4317.52	4087.7
chr12	39349906	39350823	918	*	9.36164	8.58623	9.86323	-1.25941	3.3489e-34	6.27197e-32	392.12	376.56	928.69	934.08
chr12	67928207	67929464	1258	*	9.67957	8.99191	10.1433	-1.13869	3.49903e-34	6.54661e-32	526.95	491.32	1108.9	1153.03
chr22	18893188	18894363	1176	*	10.9612	11.2994	10.5186	0.777021	3.51258e-34	6.56542e-32	2484.78	2555.83	1399.55	1534.43
chr4	185520170	185521436	1267	*	10.2528	9.69568	10.6537	-0.948042	3.61455e-34	6.74927e-32	796.62	861.91	1638.82	1582.99
chr5	14037458	14037813	356	*	9.28808	8.48334	9.80161	-1.30001	3.66195e-34	6.83098e-32	371.48	344.28	894.95	889.93
chr19	51399732	51400330	599	*	7.52769	8.31612	5.65363	2.54779	3.71471e-34	6.91585e-32	330.2	307.23	40.64	60.04
chr5	167372606	167373685	1080	*	9.25904	8.42247	9.78514	-1.3373	3.71483e-34	6.91585e-32	319.2	367	888.81	875.81
chr7	30953984	30955130	1147	*	10.9344	11.2731	10.4909	0.777074	4.09489e-34	7.61584e-32	2384.34	2565.4	1477.77	1400.23
chr12	63125643	63126298	656	*	10.2116	9.65892	10.6102	-0.941825	4.11349e-34	7.64285e-32	788.36	828.43	1570.56	1555.62
chr11	93309984	93311035	1052	*	10.0468	9.43991	10.4726	-1.02405	4.15611e-34	7.7144e-32	729.2	659.88	1389.58	1452.32
chr4	150016735	150017460	726	*	7.56528	5.53802	8.37649	-2.70098	4.17602e-34	7.74368e-32	52.28	40.64	333.59	331.08
chr1	93288433	93289049	617	*	10.3288	9.80461	10.7124	-0.899961	4.28269e-34	7.93235e-32	886.05	902.55	1680.99	1674.81
chr15	52051708	52052349	642	*	9.281	8.43159	9.81205	-1.36234	4.28622e-34	7.93235e-32	379.73	310.81	902.61	895.23
chr3	60003024	60003788	765	*	8.70023	7.65493	9.29998	-1.60872	4.33693e-34	8.01828e-32	202.25	200.83	625	635.67
chr8	133845868	133846523	656	*	7.98401	6.43197	8.7143	-2.19243	4.43449e-34	8.19057e-32	77.05	95.63	423.32	416.72
chr8	130691615	130692802	1188	*	8.92511	7.97752	9.49217	-1.48761	4.61552e-34	8.51655e-32	261.41	242.67	733.13	707.18
chr16	11690670	11691635	966	*	8.6515	9.2774	7.52122	1.7158	4.81693e-34	8.87944e-32	667.29	573.81	162.58	204.83
chr11	58497872	58498398	527	*	7.91024	6.25858	8.66018	-2.29738	4.84868e-34	8.92919e-32	64.66	88.46	411.81	397.29
chr15	80770374	80770901	528	*	9.86734	9.21902	10.313	-1.07985	4.87843e-34	8.97515e-32	565.47	626.41	1296.79	1247.5
chr7	102567423	102568246	824	*	8.60077	7.46098	9.22948	-1.72694	5.04375e-34	9.27022e-32	180.24	172.14	637.27	563.27
chr13	51865391	51866726	1336	*	9.48869	8.74914	9.97523	-1.20842	5.45972e-34	1.00249e-31	418.26	442.31	1026.08	987.05
chr11	44863628	44864338	711	*	9.61454	8.85265	10.1105	-1.23518	5.93179e-34	1.08811e-31	414.13	510.45	1095.1	1115.95
chr5	63629621	63630311	691	*	8.83907	7.82393	9.42904	-1.56793	5.96953e-34	1.09396e-31	210.5	242.67	714.73	663.92
chr1	172940340	172940845	506	*	8.17427	6.81384	8.86181	-1.9834	6.02886e-34	1.10375e-31	111.44	113.57	461.66	468.8
chr6	140304816	140305591	776	*	10.0361	9.38476	10.4833	-1.08216	6.21061e-34	1.13592e-31	605.37	731.6	1425.62	1437.31
chr3	38536650	38537271	622	*	9.43088	8.67692	9.92353	-1.22959	6.22481e-34	1.1374e-31	416.88	401.67	951.69	990.58
chr8	411387	412321	935	*	10.1051	9.5209	10.5197	-0.987786	6.23983e-34	1.1383e-31	720.94	748.34	1425.62	1510.59
chr5	28523837	28524617	781	*	9.07302	8.19621	9.61447	-1.39273	6.24187e-34	1.1383e-31	288.93	297.66	783.75	783.99
chr18	45529139	45530840	1702	*	12.4249	12.6772	12.1188	0.555738	6.25914e-34	1.14034e-31	6290.37	6809.18	4428.71	4466.45
chr12	111847463	111848170	708	*	9.91295	10.3316	9.32063	1.00086	6.50838e-34	1.1846e-31	1285.04	1292.26	644.94	633.9
chr14	68925501	68926221	721	*	10.1957	9.64547	10.5931	-0.938909	6.54613e-34	1.19032e-31	792.49	809.31	1557.53	1531.78
chr14	21100298	21101676	1379	*	10.1201	10.5271	9.55108	0.966651	6.55506e-34	1.19078e-31	1528.57	1422.56	733.13	767.22
chr14	32867128	32868024	897	*	8.66852	7.61191	9.27187	-1.62203	6.69882e-34	1.21572e-31	193.99	197.25	616.57	619.78
chr8	97456235	97457163	929	*	9.54805	8.82023	10.0295	-1.19058	6.81882e-34	1.2363e-31	430.64	473.39	1029.15	1061.21
chr8	17354275	17355041	767	*	7.62499	8.38568	5.91516	2.36414	7.13693e-34	1.29273e-31	315.07	353.85	65.95	54.74
chr20	5637913	5638570	658	*	10.0691	9.48604	10.4832	-0.98847	7.32362e-34	1.32526e-31	736.08	698.13	1408.75	1454.09
chr19	50963393	50964165	773	*	10.7871	10.2654	11.1695	-0.893685	7.36505e-34	1.33148e-31	1122.69	1338.88	2312.9	2293.7
chr5	101889718	101890309	592	*	8.07473	6.62615	8.78281	-2.08098	7.5042e-34	1.35468e-31	93.56	104	450.92	429.96
chr5	111319606	111320277	672	*	9.55152	8.80964	10.039	-1.21481	7.50786e-34	1.35468e-31	462.28	435.14	1101.24	1002.94
chr2	131791633	131793113	1481	*	9.36954	9.86036	8.61993	1.22397	7.8403e-34	1.41331e-31	949.33	909.72	378.07	408.77
chr3	149167552	149168041	490	*	9.21851	8.37214	9.7484	-1.35667	8.39807e-34	1.51239e-31	349.47	313.2	890.34	829.9
chr12	120694825	120695765	941	*	10.7904	10.3443	11.1307	-0.781014	8.43099e-34	1.51687e-31	1294.67	1305.41	2280.69	2203.65
chr17	31270249	31271533	1285	*	11.0114	10.5559	11.3571	-0.793762	8.53865e-34	1.53476e-31	1417.12	1593.51	2677.17	2569.16
chr6	113339636	113340718	1083	*	8.74755	7.70997	9.34482	-1.6012	8.72878e-34	1.56743e-31	221.51	197.25	630.37	670.1
chr14	59940794	59941516	723	*	9.14692	8.28673	9.6821	-1.37393	8.97958e-34	1.61093e-31	323.32	301.25	846.63	796.35
chr5	71708125	71708834	710	*	8.91052	7.96462	9.47698	-1.4843	9.06632e-34	1.62493e-31	254.53	245.06	727.77	697.47
chr1	59094409	59095186	778	*	9.0731	8.18289	9.61953	-1.40853	9.58439e-34	1.71615e-31	275.17	306.03	799.85	773.4
chr13	93162586	93163237	652	*	8.92648	7.96266	9.49918	-1.50245	9.70956e-34	1.7369e-31	231.14	267.78	739.27	708.06
chr13	45203661	45204777	1117	*	8.26435	6.96475	8.93678	-1.91083	9.9788e-34	1.78336e-31	118.32	131.5	495.4	484.7
chr4	165492451	165493472	1022	*	8.64193	7.5491	9.25655	-1.67189	1.01361e-33	1.80974e-31	203.63	170.95	621.17	602.12
chr9	136333344	136336067	2724	*	9.4465	9.92223	8.73191	1.17485	1.02243e-33	1.82376e-31	950.71	989.82	430.98	419.36
chr12	28075357	28076253	897	*	10.1012	9.50186	10.5234	-1.01423	1.04736e-33	1.86645e-31	774.6	675.42	1476.24	1467.33
chr7	111049834	111050505	672	*	8.28908	6.99005	8.96137	-1.9079	1.07305e-33	1.91041e-31	115.57	138.67	500.77	496.17
chr6	102253871	102254736	866	*	9.7008	9.0008	10.1701	-1.15127	1.11978e-33	1.99173e-31	474.67	549.9	1161.82	1142.44
chr17	80313694	80314350	657	*	8.89095	7.94217	9.45842	-1.4877	1.24046e-33	2.20428e-31	250.4	241.48	713.96	693.05
chr5	176881413	176883057	1645	*	11.7643	12.0403	11.4228	0.612992	1.28242e-33	2.27668e-31	4163.31	4260.52	2835.14	2655.68
chr6	49374035	49374735	701	*	8.71629	7.59544	9.33938	-1.6957	1.31738e-33	2.33653e-31	169.23	217.57	680.22	615.36
chr3	133315883	133316519	637	*	8.73354	7.69167	9.3322	-1.60281	1.35377e-33	2.3988e-31	199.5	213.98	670.25	618.89
chr12	125423645	125425548	1904	*	12.4936	12.7237	12.2196	0.501231	1.4024e-33	2.48262e-31	6637.09	6891.67	4808.32	4730.43
chr11	108908663	108909511	849	*	8.3063	7.03516	8.97139	-1.87644	1.45693e-33	2.57673e-31	122.45	139.87	501.54	502.35
chr1	29472140	29472904	765	*	10.334	9.78756	10.7294	-0.931477	1.50451e-33	2.65837e-31	835.14	932.44	1721.64	1673.92
chr17	39571919	39572634	716	*	10.0647	9.48418	10.4775	-0.985066	1.52068e-33	2.68441e-31	740.21	692.16	1414.12	1437.31
chr12	39399887	39400493	607	*	8.43346	7.14787	9.1023	-1.90546	1.53179e-33	2.70149e-31	166.48	117.15	530.68	568.57
chr2	134505550	134506353	804	*	7.82463	6.16622	8.57585	-2.31348	1.54525e-33	2.72266e-31	74.3	69.34	371.17	391.99
chr7	76052511	76053326	816	*	10.9831	10.5532	11.3139	-0.75627	1.54844e-33	2.72571e-31	1512.06	1493.1	2627.32	2464.09
chr10	80732035	80734097	2063	*	12.6276	12.8518	12.3621	0.487269	1.55113e-33	2.7279e-31	7280.98	7503.73	5196.36	5332.54
chr12	93567663	93568247	585	*	8.57882	7.46633	9.19941	-1.68865	1.57519e-33	2.7676e-31	171.98	181.71	567.49	608.3
chr12	30570450	30571293	844	*	10.5701	10.0929	10.9281	-0.828093	1.58992e-33	2.79088e-31	1077.29	1106.97	1933.3	1963.51
chr17	54253444	54254005	562	*	9.34769	8.55275	9.85727	-1.28658	1.61155e-33	2.8262e-31	385.24	365.8	967.8	887.29
chr15	35989696	35990392	697	*	9.21144	8.37851	9.73612	-1.33821	1.76734e-33	3.09651e-31	353.59	312.01	846.63	859.03
chr11	57061969	57062718	750	*	9.23698	8.37464	9.77297	-1.37893	1.89259e-33	3.31287e-31	367.35	296.47	864.27	885.52
chr2	10262289	10263342	1054	*	11.2813	11.574	10.9136	0.656625	1.92591e-33	3.36494e-31	3024.11	3073.46	1909.52	1948.5
chr1	149185966	149186768	803	*	7.03636	7.92373	4.30133	3.36424	1.92593e-33	3.36494e-31	211.88	273.75	25.31	14.13
chr3	134072513	134073405	893	*	9.33933	8.48207	9.87339	-1.36512	1.93189e-33	3.37222e-31	330.2	384.93	999.24	876.69
chr9	106830746	106831265	520	*	8.98247	8.07908	9.53373	-1.42735	1.94395e-33	3.39011e-31	268.29	272.56	740.8	741.61
chr5	38783104	38783933	830	*	9.85867	9.23669	10.2919	-1.04492	1.95958e-33	3.41419e-31	613.63	592.93	1267.65	1239.55
chr4	89099165	89100181	1017	*	10.3009	9.77281	10.6866	-0.904846	1.99041e-33	3.46469e-31	853.03	896.57	1642.65	1653.62
chr16	89267613	89268673	1061	*	8.78879	9.359	7.83218	1.49521	1.99603e-33	3.47125e-31	689.3	624.02	226.23	229.55
chr2	172470519	172472006	1488	*	8.39716	7.17852	9.04821	-1.82303	2.03502e-33	3.53577e-31	158.22	131.5	523.78	535.02
chr16	89786692	89789258	2567	*	12.4012	12.6289	12.1305	0.495531	2.07196e-33	3.59662e-31	6301.38	6366.87	4450.19	4517.65
chr15	93473296	93474460	1165	*	10.1035	9.50399	10.5257	-1.00993	2.20396e-33	3.82221e-31	690.68	761.49	1526.09	1422.31
chr1	183250648	183251522	875	*	11.0557	10.6472	11.3736	-0.720382	2.22411e-33	3.85111e-31	1560.21	1647.31	2651.09	2655.68
chrX	115448472	115449068	597	*	8.34084	7.07154	9.00545	-1.876	2.22493e-33	3.85111e-31	127.95	141.06	541.42	486.46
chr12	59460821	59461294	474	*	9.10171	8.20776	9.64952	-1.41358	2.22679e-33	3.85111e-31	279.3	312.01	838.2	768.1
chrX	142667976	142668868	893	*	8.45356	7.28959	9.08929	-1.75131	2.28036e-33	3.94012e-31	152.72	160.19	537.58	551.79
chr8	119427796	119428272	477	*	8.75946	7.73341	9.353	-1.5816	2.31726e-33	4.0002e-31	200.87	224.74	674.85	633.02
chr11	64636272	64637200	929	*	11.7746	11.4356	12.0489	-0.60846	2.40715e-33	4.15155e-31	2681.53	2858.28	4285.31	4189.23
chr11	66812526	66813179	654	*	9.8965	10.3145	9.30558	0.999298	2.66646e-33	4.59454e-31	1253.4	1293.46	633.44	632.14
chr3	73078143	73079003	861	*	10.4314	9.8882	10.825	-0.925622	2.78873e-33	4.80081e-31	879.17	1016.12	1812.13	1816.07
chr3	20717841	20718408	568	*	8.68075	7.63534	9.28054	-1.60949	2.90372e-33	4.99418e-31	206.38	191.27	608.13	635.67
chr1	110364712	110365342	631	*	10.6717	11.0138	10.2225	0.78511	3.05268e-33	5.24557e-31	2063.77	2071.68	1217.03	1172.45
chr17	31642524	31643121	598	*	8.82298	7.80186	9.41492	-1.5739	3.26549e-33	5.60611e-31	203.63	242.67	710.13	655.09
chr10	74942167	74942839	673	*	9.40571	8.66101	9.89444	-1.21594	3.31511e-33	5.6861e-31	403.12	406.45	957.06	946.44
chr6	161333130	161334212	1083	*	8.34729	7.11796	9.00126	-1.83046	3.35723e-33	5.75307e-31	140.34	137.47	496.94	527.96
chr5	109712001	109712685	685	*	8.53038	7.39813	9.15686	-1.71079	3.45978e-33	5.9234e-31	156.85	180.51	577.46	564.15
chr5	167229694	167230661	968	*	9.37322	8.5972	9.87507	-1.26106	3.5996e-33	6.15715e-31	400.37	374.17	973.17	904.94
chr10	125851651	125853302	1652	*	9.90927	10.3353	9.30213	1.02403	3.60493e-33	6.16065e-31	1234.13	1349.64	624.24	638.32
chr8	123772389	123773018	630	*	9.84179	9.21352	10.278	-1.0517	3.64301e-33	6.22005e-31	576.48	610.87	1256.91	1226.31
chr14	71152504	71152999	496	*	8.93378	7.89483	9.5315	-1.59336	3.74828e-33	6.39398e-31	202.25	273.75	767.64	712.48
chr3	192512056	192513448	1393	*	9.61945	8.93294	10.0827	-1.13729	3.77214e-33	6.42882e-31	507.69	469.8	1088.2	1080.63
chr2	47426070	47426691	622	*	10.3634	9.77986	10.7777	-0.985632	4.29133e-33	7.30703e-31	809	949.17	1821.33	1689.82
chr9	83747181	83748073	893	*	8.84356	7.8691	9.41991	-1.51595	4.44408e-33	7.56026e-31	220.14	247.45	696.32	673.63
chr5	23466420	23467106	687	*	9.47441	8.72436	9.96541	-1.21998	4.71314e-33	8.01072e-31	397.62	448.29	976.23	1023.25
chr13	46869717	46871468	1752	*	9.68159	9.02042	10.1333	-1.10049	5.10392e-33	8.66704e-31	526.95	511.65	1131.14	1115.07
chr18	11688979	11690390	1412	*	9.77655	10.207	9.16035	1.03469	5.11479e-33	8.67765e-31	1198.36	1165.55	576.69	567.69
chr12	67027141	67027874	734	*	9.03378	8.15582	9.57565	-1.39549	5.14753e-33	8.7253e-31	293.06	277.34	755.37	770.75
chr4	24925245	24926627	1383	*	10.6888	10.2238	11.0399	-0.810826	5.31802e-33	9.00614e-31	1199.74	1191.85	2167.96	2042.96
chr6	133872922	133873473	552	*	9.73511	9.07139	10.188	-1.10225	5.50695e-33	9.31767e-31	520.07	555.88	1199.4	1133.61
chr3	194461451	194462302	852	*	9.98414	10.4042	9.38914	1.00635	5.67563e-33	9.59442e-31	1286.42	1423.76	665.65	675.4
chr1	58921996	58923245	1250	*	9.39623	8.63567	9.89166	-1.24012	5.70456e-33	9.63464e-31	414.13	381.34	975.47	924.37
chr8	32923451	32923861	411	*	7.75475	5.92272	8.53643	-2.48836	5.74923e-33	9.70135e-31	59.16	62.16	332.06	410.54
chr2	101358504	101359762	1259	*	9.84207	9.2182	10.2762	-1.04809	5.7649e-33	9.71904e-31	615	576.2	1248.48	1231.61
chr5	27241689	27242648	960	*	9.23915	8.44249	9.74942	-1.28622	5.80561e-33	9.77742e-31	346.71	349.07	858.9	862.57
chr1	193624134	193624946	813	*	10.226	9.69295	10.6144	-0.913796	5.80996e-33	9.77742e-31	836.52	818.87	1562.9	1572.39
chr10	114538265	114539156	892	*	9.04542	8.12992	9.60108	-1.44722	5.91096e-33	9.93848e-31	306.81	253.43	756.91	796.35
chr11	121762754	121763322	569	*	8.4273	7.22308	9.07438	-1.80612	6.08836e-33	1.02276e-30	163.73	135.08	559.05	519.13
chr3	159664924	159665552	629	*	9.15462	8.26648	9.70028	-1.40222	6.18295e-33	1.03727e-30	275.17	340.7	819.79	844.03
chr10	22343816	22344449	634	*	8.84785	7.89619	9.41633	-1.49018	6.1858e-33	1.03727e-30	242.15	234.3	677.92	688.64
chr1	221810868	221811526	659	*	8.9589	8.05414	9.51067	-1.4282	6.27992e-33	1.05211e-30	261.41	270.17	727	731.9
chr19	18770881	18771526	646	*	8.26471	8.90806	7.07384	1.78781	6.40136e-33	1.0715e-30	462.28	498.5	127.3	142.14
chr19	39628898	39630579	1682	*	11.2826	10.9059	11.581	-0.669542	6.52478e-33	1.09118e-30	1869.78	1967.68	3059.07	3067.98
chr7	113585147	113586089	943	*	7.7397	6.0217	8.50186	-2.37793	6.57143e-33	1.098e-30	70.17	59.77	366.57	358.45
chr3	64337635	64338626	992	*	9.71181	9.04505	10.1661	-1.10836	6.71721e-33	1.12136e-30	544.84	511.65	1116.57	1181.28
chr5	56790328	56790984	657	*	10.1224	9.55988	10.5261	-0.955682	6.8048e-33	1.13497e-30	736.08	773.44	1450.16	1499.12
chr2	183047064	183047615	552	*	7.403	5.15302	8.24277	-2.91432	6.91651e-33	1.15258e-30	41.28	29.89	290.65	315.19
chr12	53350768	53351374	607	*	10.525	10.04	10.8874	-0.841559	6.9634e-33	1.15936e-30	1060.78	1044.81	1937.9	1850.5
chr16	55504342	55505902	1561	*	10.1575	9.59432	10.5615	-0.957232	6.97806e-33	1.16077e-30	749.84	796.16	1550.63	1471.75
chr11	5369378	5370307	930	*	8.85299	7.88378	9.42755	-1.50814	7.13385e-33	1.18564e-30	220.14	252.24	683.29	693.94
chrX	39618771	39619534	764	*	9.73574	9.05248	10.1975	-1.13435	7.4191e-33	1.23195e-30	568.22	493.71	1207.83	1140.67
chr15	62651409	62652296	888	*	9.17963	8.34918	9.70335	-1.33442	7.47592e-33	1.24029e-30	342.59	309.62	848.93	818.42
chr18	47538160	47538776	617	*	9.14553	8.30361	9.6737	-1.34751	7.86746e-33	1.30409e-30	324.7	307.23	792.95	840.49
chr17	70598702	70600095	1394	*	11.3198	10.9228	11.6309	-0.704006	8.21616e-33	1.36069e-30	1939.94	1942.58	3302.94	3039.73
chr11	121712291	121713043	753	*	9.65438	8.96794	10.1176	-1.13252	8.34641e-33	1.38104e-30	471.92	529.58	1116.57	1105.36
chr11	75062098	75063599	1502	*	10.5887	10.9363	10.1299	0.800303	8.59795e-33	1.42141e-30	1990.85	1928.23	1107.37	1133.61
chr9	80367203	80367888	686	*	9.59673	8.85096	10.0859	-1.21771	8.77649e-33	1.44964e-30	478.79	444.7	1015.35	1158.33
chr4	72116632	72117445	814	*	8.83471	7.85687	9.41221	-1.5199	8.78522e-33	1.44981e-30	217.38	246.26	697.86	664.8
chr3	138945399	138946350	952	*	8.33287	7.08431	8.992	-1.84848	8.88541e-33	1.46505e-30	127.95	143.45	487.73	530.61
chr1	231035507	231036084	578	*	9.91604	9.31482	10.3391	-1.01443	9.04952e-33	1.4908e-30	642.52	631.19	1316.73	1273.98
chr9	17824246	17825202	957	*	9.06508	8.20224	9.60126	-1.37455	9.10221e-33	1.49816e-30	298.56	290.49	761.51	791.94
chr12	95347698	95348474	777	*	9.56901	8.8568	10.0437	-1.16912	9.20269e-33	1.51338e-30	452.65	474.59	1015.35	1095.64
chr13	52927298	52927754	457	*	7.87858	6.31505	8.61122	-2.21083	9.26856e-33	1.52287e-30	83.93	75.31	391.87	390.23
chr5	32790413	32791173	761	*	8.9125	7.87915	9.50841	-1.59917	9.45322e-33	1.55185e-30	272.42	198.44	707.06	749.56
chr16	3230366	3230676	311	*	7.19602	8.02214	5.05736	2.78824	9.78944e-33	1.60564e-30	254.53	265.39	38.34	28.25
chr1	219471776	219473103	1328	*	9.9032	9.28506	10.3345	-1.03827	9.82443e-33	1.60997e-30	635.64	612.06	1248.48	1334.02
chr11	72968355	72969597	1243	*	11.8422	11.5176	12.1071	-0.584564	1.05515e-32	1.7276e-30	2845.25	3018.47	4402.64	4420.54
chr13	111051269	111051783	515	*	8.55643	7.42952	9.18133	-1.70475	1.08467e-32	1.77439e-30	167.85	176.92	547.55	613.6
chr17	61027293	61027947	655	*	9.62981	8.90948	10.108	-1.1859	1.09544e-32	1.79044e-30	524.2	437.53	1085.13	1122.13
chr18	38456914	38457621	708	*	8.84298	7.89182	9.4113	-1.48718	1.10492e-32	1.80437e-30	231.14	243.87	680.22	681.58
chr13	91369432	91370383	952	*	9.5587	8.85374	10.0302	-1.16184	1.11573e-32	1.82044e-30	465.04	460.24	1081.3	1010.01
chr8	95322970	95323663	694	*	9.68214	8.93075	10.1737	-1.22009	1.11988e-32	1.82561e-30	441.65	534.36	1094.33	1215.71
chr5	172925207	172926413	1207	*	10.0446	9.47655	10.4511	-0.965202	1.13258e-32	1.84471e-30	709.94	714.87	1411.05	1388.76
chr6	46458735	46460092	1358	*	8.48201	9.08781	7.41761	1.63117	1.13757e-32	1.85124e-30	522.82	565.44	173.31	168.63
chr16	60939577	60940181	605	*	10.0294	9.45571	10.4388	-0.974477	1.13874e-32	1.85153e-30	718.19	686.18	1381.15	1394.94
chr21	33783825	33785464	1640	*	10.9301	11.2665	10.4908	0.768755	1.14672e-32	1.8629e-30	2583.84	2343.05	1444.03	1433.78
chr2	28383772	28384676	905	*	9.78626	9.11209	10.2439	-1.12178	1.19103e-32	1.9332e-30	599.87	506.86	1231.6	1193.64
chr14	31539599	31540144	546	*	9.57614	8.88343	10.0422	-1.14243	1.2185e-32	1.97608e-30	456.78	487.74	1065.19	1043.55
chr1	95155516	95156230	715	*	7.84122	6.20246	8.5887	-2.29584	1.23954e-32	2.00846e-30	83.93	63.36	372.7	397.29
chr21	44833173	44834299	1127	*	7.59825	5.46255	8.42399	-2.78125	1.25327e-32	2.02886e-30	34.4	53.79	384.97	301.94
chr18	394803	396293	1491	*	10.3612	9.82399	10.7518	-0.916813	1.25429e-32	2.02886e-30	851.65	961.13	1703.23	1745.44
chr9	133328900	133329455	556	*	9.94323	9.35371	10.3605	-0.997178	1.32846e-32	2.14698e-30	661.78	646.73	1317.49	1311.95
chr18	499465	500972	1508	*	8.25609	8.90236	7.05481	1.79664	1.34226e-32	2.16741e-30	506.31	450.68	127.3	138.61
chr7	111351013	111352128	1116	*	8.85355	7.9081	9.41986	-1.48189	1.34754e-32	2.17407e-30	244.9	235.5	673.32	696.59
chr2	12154176	12154949	774	*	8.94941	8.03702	9.50395	-1.44041	1.38335e-32	2.22991e-30	268.29	257.02	748.47	703.65
chr2	27944163	27944685	523	*	9.58134	10.0416	8.90156	1.12788	1.39389e-32	2.24497e-30	1041.52	1066.33	453.22	503.24
chr15	45492209	45493571	1363	*	11.2629	11.5531	10.8991	0.649748	1.39981e-32	2.25257e-30	3019.98	2989.78	1890.35	1929.07
chr9	16304347	16305340	994	*	7.63965	5.78315	8.42528	-2.50582	1.43642e-32	2.30816e-30	46.78	63.36	345.86	341.67
chr6	159507135	159507610	476	*	7.59064	5.60942	8.39529	-2.63395	1.43681e-32	2.30816e-30	42.65	54.99	363.5	309.89
chr9	35673327	35674192	866	*	10.847	10.4145	11.1794	-0.75808	1.5475e-32	2.48385e-30	1324.94	1404.63	2302.16	2336.08
chr3	190091907	190092502	596	*	7.88236	6.21127	8.63595	-2.33559	1.57199e-32	2.52099e-30	90.81	57.38	413.35	382.28
chr20	24765817	24766821	1005	*	11.2551	10.8605	11.5646	-0.698444	1.59711e-32	2.55908e-30	1791.35	1927.04	3095.12	2962.92
chr9	107041976	107043330	1355	*	9.47258	8.72942	9.96065	-1.2172	1.69413e-32	2.71223e-30	456.78	392.1	1002.31	990.58
chr10	79452510	79453081	572	*	8.69638	7.66579	9.2914	-1.58805	1.70316e-32	2.7227e-30	198.12	208.01	651.08	602.12
chr3	155970338	155970940	603	*	8.72817	7.69999	9.3224	-1.5826	1.70358e-32	2.7227e-30	199.5	216.37	611.2	669.22
chr17	79828033	79830231	2199	*	11.613	11.8921	11.2667	0.620958	1.7146e-32	2.73798e-30	3738.18	3863.64	2536.83	2390.82
chr2	20927587	20928520	934	*	7.97276	6.47431	8.69178	-2.13011	1.79685e-32	2.86689e-30	79.8	98.03	421.78	405.24
chr10	77118368	77119320	953	*	10.9717	10.562	11.2904	-0.722396	1.85742e-32	2.961e-30	1479.04	1544.5	2498.49	2510.89
chr20	6956509	6957599	1091	*	9.16113	8.29928	9.69694	-1.3776	1.91044e-32	3.04293e-30	346.71	283.32	833.6	826.37
chr4	11156615	11157951	1337	*	9.4735	8.73726	9.95862	-1.20147	1.93188e-32	3.07447e-30	410	443.51	962.43	1027.66
chr11	106986897	106987633	737	*	8.64226	7.5951	9.24261	-1.6121	1.93842e-32	3.08165e-30	205	181.71	599.7	611.83
chr19	4145524	4146269	746	*	9.88973	10.303	9.30825	0.98482	1.93967e-32	3.08165e-30	1272.66	1254.01	629.61	638.32
chr21	17011368	17012185	818	*	7.63377	5.81037	8.41403	-2.47833	1.96582e-32	3.12055e-30	53.66	58.58	352	330.19
chr13	77459285	77461097	1813	*	11.1268	11.4265	10.7481	0.673642	1.96756e-32	3.12066e-30	2744.81	2760.25	1739.28	1700.41
chr3	149172527	149172990	464	*	7.50332	5.4229	8.32181	-2.72597	2.0902e-32	3.31238e-30	34.4	51.4	333.59	306.36
chr4	69133056	69133690	635	*	8.805	7.83666	9.37926	-1.50841	2.16209e-32	3.42341e-30	222.89	234.3	650.31	681.58
chr7	33289902	33290506	605	*	7.27087	4.81731	8.13278	-3.09783	2.28769e-32	3.61922e-30	28.89	27.49	275.31	286.05
chr10	94575670	94576444	775	*	8.55219	7.37254	9.19239	-1.76225	2.30419e-32	3.64226e-30	138.96	192.46	593.56	576.52
chr11	72948768	72949335	568	*	9.42805	9.9042	8.71251	1.17555	2.33255e-32	3.68164e-30	921.82	994.6	430.22	408.77
chr10	104536319	104537225	907	*	10.8714	10.4403	11.2029	-0.756086	2.33304e-32	3.68164e-30	1345.58	1433.32	2388.05	2326.37
chr5	24804182	24804965	784	*	9.99392	9.41855	10.4041	-0.976465	2.40074e-32	3.78529e-30	692.05	676.61	1361.97	1348.14
chr4	65765221	65765773	553	*	8.22005	6.91236	8.89454	-1.91667	2.42682e-32	3.8232e-30	114.2	126.72	454.76	497.06
chr1	66994493	66994899	407	*	7.49256	5.47431	8.3025	-2.66981	2.46918e-32	3.88667e-30	39.9	49.01	319.79	311.65
chr18	61484632	61485862	1231	*	7.64107	5.78492	8.42665	-2.52556	2.51255e-32	3.95162e-30	66.04	44.23	347.4	340.79
chr11	75176834	75177585	752	*	9.47667	8.75356	9.95612	-1.18627	2.57139e-32	4.04077e-30	429.26	433.94	1026.08	960.56
chr15	101986196	101987313	1118	*	6.95973	7.82379	4.48463	3.12525	2.60343e-32	4.0877e-30	228.39	224.74	19.17	25.6
chr19	42783991	42785546	1556	*	11.6875	11.9739	11.3297	0.638683	2.61241e-32	4.09581e-30	4046.37	3998.72	2693.27	2454.38
chr21	28944023	28944415	393	*	8.86172	7.91829	9.42733	-1.47808	2.61297e-32	4.09581e-30	243.52	240.28	667.18	709.83
chr4	11905636	11906285	650	*	9.30782	8.48025	9.83041	-1.32235	2.64761e-32	4.14663e-30	323.32	390.91	878.84	942.02
chr15	39006430	39007520	1091	*	8.69536	7.62623	9.30264	-1.6414	2.69843e-32	4.22271e-30	214.63	180.51	667.95	595.06
chr16	65732786	65733345	560	*	8.91839	7.91923	9.50307	-1.55449	2.76842e-32	4.32862e-30	264.16	219.96	777.61	673.63
chr1	193815999	193816802	804	*	7.59977	5.66594	8.39742	-2.60646	2.81869e-32	4.40354e-30	63.29	38.25	333.59	340.79
chr5	143407645	143408633	989	*	8.98048	8.05805	9.53862	-1.45138	2.83303e-32	4.42204e-30	272.42	260.6	701.69	785.76
chr4	149637403	149638064	662	*	8.1347	6.80077	8.81576	-1.95154	2.83524e-32	4.42204e-30	114.2	108.78	444.79	456.44
chr10	22121089	22122160	1072	*	8.12971	6.73432	8.82557	-2.0264	2.87744e-32	4.48411e-30	119.7	93.24	433.29	474.1
chr3	189659432	189659871	440	*	8.85132	7.87736	9.4275	-1.51251	2.90847e-32	4.52871e-30	213.26	257.02	689.42	687.76
chr5	169118400	169118843	444	*	8.16236	6.84347	8.83967	-1.93588	2.91395e-32	4.53348e-30	119.7	109.98	467.79	448.5
chr18	53430401	53430978	578	*	9.22852	8.4109	9.74717	-1.31317	3.15332e-32	4.90182e-30	341.21	339.5	818.26	900.53
chr4	186487990	186488680	691	*	8.33675	7.12381	8.98624	-1.80627	3.22321e-32	5.0063e-30	130.71	148.23	514.57	499.71
chr7	13944242	13944795	554	*	9.26953	8.49258	9.77176	-1.26057	3.3741e-32	5.23633e-30	370.1	350.26	868.1	880.22
chr15	95453182	95454275	1094	*	8.76738	7.75969	9.35489	-1.55481	3.39562e-32	5.26537e-30	196.75	236.7	651.85	657.74
chr19	8408003	8408565	563	*	10.0198	10.4195	9.46498	0.945777	3.53991e-32	5.48458e-30	1342.83	1396.27	712.43	701
chr7	43686959	43688262	1304	*	11.4416	11.0836	11.7281	-0.639061	3.608e-32	5.58545e-30	2105.05	2235.46	3395.73	3389.34
chr8	94858717	94859463	747	*	9.62612	8.95743	10.0813	-1.11056	3.68064e-32	5.69322e-30	507.69	486.54	1067.49	1099.18
chr8	37278560	37279262	703	*	8.89735	7.98126	9.45322	-1.44351	3.68405e-32	5.69379e-30	253.16	252.24	712.43	689.52
chr9	83390376	83390991	616	*	8.2511	6.87528	8.94234	-1.98735	3.85065e-32	5.94638e-30	94.93	139.87	476.23	507.65
chr21	18263985	18264659	675	*	7.82471	6.23307	8.56301	-2.23315	3.85693e-32	5.95117e-30	71.54	78.9	375	381.4
chr6	100650358	100651131	774	*	10.0389	9.44562	10.4581	-1.00375	3.88249e-32	5.98567e-30	734.7	659.88	1367.34	1446.14
chr12	112083155	112083688	534	*	9.00182	8.11872	9.54561	-1.40013	3.97025e-32	6.11594e-30	273.79	282.12	770.71	723.95
chr6	135027911	135028979	1069	*	9.3819	8.62178	9.87713	-1.23464	4.0203e-32	6.18796e-30	374.23	413.62	967.03	913.77
chr17	29920809	29921284	476	*	9.97733	9.39085	10.3931	-0.991547	4.10085e-32	6.30677e-30	657.65	684.98	1375.78	1313.71
chr17	77268553	77269576	1024	*	8.99901	9.53426	8.13863	1.36759	4.13293e-32	6.3509e-30	770.47	712.48	295.25	268.39
chr2	222864400	222865441	1042	*	10.1952	9.64659	10.5917	-0.93533	4.43856e-32	6.81496e-30	774.6	828.43	1582.83	1503.53
chr5	82809276	82809790	515	*	8.13309	6.68315	8.84147	-2.08558	4.76135e-32	7.30459e-30	108.69	96.83	506.91	410.54
chr6	27636304	27636795	492	*	6.77373	7.68252	3.74496	3.66479	4.86191e-32	7.45276e-30	216.01	194.86	15.34	11.48
chr6	134338974	134339602	629	*	8.31083	6.97952	8.99124	-1.94583	4.88287e-32	7.47765e-30	119.7	132.69	561.35	456.44
chr10	29352918	29353847	930	*	9.8784	9.25991	10.3099	-1.03612	4.88613e-32	7.47765e-30	580.61	645.53	1280.68	1258.09
chr5	20276278	20277247	970	*	10.0655	9.451	10.4951	-1.03462	5.06015e-32	7.73765e-30	747.08	652.71	1380.38	1506.18
chr1	147825607	147826179	573	*	7.1493	7.977	4.99822	2.81204	5.69764e-32	8.70537e-30	260.04	243.87	26.84	37.08
chr5	71747767	71749046	1280	*	9.54661	8.81543	10.0295	-1.19276	6.27528e-32	9.58013e-30	416.88	484.15	1011.51	1078.87
chr19	42787385	42788655	1271	*	11.6734	11.9345	11.3543	0.576738	6.37224e-32	9.72024e-30	3870.26	3958.08	2604.31	2631.84
chr15	95384408	95385057	650	*	9.18981	8.3813	9.70485	-1.29936	6.44962e-32	9.83027e-30	317.82	349.07	837.43	831.66
chr7	84041328	84042252	925	*	10.6396	10.1719	10.9922	-0.812235	6.83774e-32	1.04134e-29	1103.43	1203.8	2052.16	2021.78
chr1	33526106	33526804	699	*	8.59848	7.54562	9.20064	-1.61853	6.88132e-32	1.04712e-29	196.75	176.92	595.86	580.93
chr8	32878013	32878625	613	*	7.98361	6.29384	8.74065	-2.3483	6.90183e-32	1.04939e-29	93.56	63.36	373.47	482.05
chr9	38383144	38384149	1006	*	9.88718	9.27035	10.3179	-1.03318	7.20407e-32	1.09446e-29	584.73	650.32	1257.68	1295.17
chr4	53779895	53780878	984	*	9.03201	8.17773	9.56494	-1.36344	7.73536e-32	1.17422e-29	295.81	283.32	759.98	754.86
chr17	8123990	8127293	3304	*	12.7626	12.9778	12.5095	0.46568	7.87603e-32	1.19461e-29	8011.56	8121.77	5712.47	5949.67
chr3	167720535	167721251	717	*	8.20791	6.85953	8.89251	-1.96962	8.24231e-32	1.24915e-29	121.07	111.18	516.11	434.37
chr17	30081014	30081832	819	*	10.6407	10.1808	10.9888	-0.800525	8.37483e-32	1.26821e-29	1139.2	1182.28	1986.98	2077.4
chr5	125052830	125053353	524	*	9.16793	8.34958	9.68689	-1.31773	8.47131e-32	1.28179e-29	343.96	308.42	839.73	808.71
chr4	120491501	120492126	626	*	8.91222	7.99803	9.4674	-1.43821	8.52381e-32	1.28869e-29	243.52	267.78	720.1	695.7
chr12	106371272	106371958	687	*	8.23476	6.96618	8.89918	-1.87509	8.78142e-32	1.32657e-29	129.33	120.74	457.83	497.06
chr17	49012698	49013093	396	*	8.86046	9.40371	7.97879	1.39728	8.79612e-32	1.32772e-29	667.29	687.37	259.97	244.56
chr4	149711750	149712536	787	*	9.6347	8.96419	10.0907	-1.11435	9.12899e-32	1.37685e-29	515.94	482.95	1119.64	1061.21
chr2	165736589	165737059	471	*	8.04712	6.62087	8.75013	-2.04848	9.37773e-32	1.41323e-29	88.05	108.78	447.09	414.07
chr11	128584777	128585233	457	*	9.85693	9.24631	10.2846	-1.02736	9.52685e-32	1.43455e-29	620.51	594.13	1216.27	1278.4
chr2	174982579	174983655	1077	*	9.34127	8.59775	9.82949	-1.21449	9.65963e-32	1.45338e-29	393.49	381.34	915.65	904.06
chr7	128467351	128468045	695	*	11.279	11.6011	10.8637	0.732989	9.71383e-32	1.46036e-29	2922.3	3291.03	1901.85	1824.9
chr4	144547319	144547997	679	*	8.17388	6.76262	8.87344	-2.02752	9.72516e-32	1.46089e-29	88.05	129.11	487.73	450.26
chr8	128680373	128681497	1125	*	10.5254	10.0232	10.8972	-0.863963	9.86552e-32	1.48079e-29	975.48	1105.78	1894.95	1919.36
chr3	145619845	145620352	508	*	8.05761	6.68521	8.74802	-1.99275	1.02771e-31	1.54133e-29	101.81	104	437.89	422.01
chr8	40381633	40382403	771	*	9.43795	8.68172	9.93155	-1.22979	1.02909e-31	1.54217e-29	392.12	429.16	1026.08	927.02
chr2	226332514	226333242	729	*	8.2857	7.06997	8.93596	-1.81175	1.0334e-31	1.5474e-29	134.83	133.89	481.6	497.94
chr8	142127020	142128381	1362	*	10.8926	10.4731	11.2173	-0.740247	1.03789e-31	1.55287e-29	1468.03	1374.75	2390.36	2371.39
chr5	176513486	176514395	910	*	9.3044	9.79386	8.55799	1.2201	1.03887e-31	1.55311e-29	866.78	908.53	357.36	396.41
chr17	71766476	71767327	852	*	8.16168	8.83726	6.84968	1.91685	1.04713e-31	1.5642e-29	476.04	438.72	132.67	98
chr11	124682510	124683296	787	*	8.34984	7.13519	8.9998	-1.80702	1.04944e-31	1.56641e-29	129.33	151.82	532.98	490.88
chr3	13259296	13260123	828	*	11.1102	10.7199	11.4171	-0.691565	1.05879e-31	1.5791e-29	1675.78	1697.51	2675.63	2793.41
chr13	94382707	94383609	903	*	8.04119	6.57724	8.75269	-2.08595	1.14627e-31	1.70822e-29	79.8	111.18	419.48	443.2
chr6	30731789	30732386	598	*	9.33227	8.56272	9.83144	-1.25081	1.16558e-31	1.73561e-29	397.62	358.63	881.91	940.26
chr13	34736197	34737108	912	*	9.80771	9.18856	10.2395	-1.03949	1.20958e-31	1.79871e-29	594.37	572.61	1180.99	1236.9
chr7	157902055	157902831	777	*	7.10296	7.94045	4.87231	2.87017	1.20987e-31	1.79871e-29	264.16	227.13	32.98	25.6
chrX	50390956	50391823	868	*	7.80769	6.20291	8.54858	-2.24283	1.24018e-31	1.84231e-29	66.04	81.29	378.07	370.81
chr4	11184086	11184936	851	*	9.65583	8.98049	10.114	-1.11962	1.35817e-31	2.01598e-29	502.18	508.06	1158.75	1057.68
chr21	40486576	40487554	979	*	10.5496	10.0837	10.9012	-0.810157	1.3696e-31	2.03133e-29	1071.78	1098.6	1884.22	1940.55
chr19	44351465	44352650	1186	*	7.05022	7.89332	4.77158	2.91748	1.38505e-31	2.05263e-29	253.16	222.35	29.91	24.72
chr17	65487035	65487617	583	*	10.195	10.6047	9.62071	0.974293	1.42185e-31	2.10551e-29	1459.77	1654.48	820.56	753.97
chr9	34522735	34523520	786	*	11.3139	11.5981	10.9597	0.633339	1.43585e-31	2.12455e-29	3141.06	3059.11	2009.98	1973.22
chr3	164068773	164069516	744	*	8.18804	6.86652	8.86601	-1.93114	1.43727e-31	2.12498e-29	111.44	121.93	437.89	495.29
chr2	193450132	193450876	745	*	8.1021	6.68615	8.80275	-2.05088	1.45346e-31	2.14723e-29	121.07	84.88	434.05	459.09
chr4	76765251	76765941	691	*	9.95464	9.36809	10.3705	-0.993708	1.47601e-31	2.17883e-29	679.67	641.95	1355.07	1292.52
chr11	1770245	1772858	2614	*	11.8419	12.127	11.4862	0.636752	1.49755e-31	2.20888e-29	4259.62	4686.1	2949.41	2788.11
chr5	156811921	156812569	649	*	10.3156	9.79721	10.6961	-0.89069	1.53766e-31	2.26626e-29	870.91	908.53	1708.6	1609.47
chr3	14482987	14483756	770	*	8.5399	9.1307	7.52224	1.57415	1.56799e-31	2.30914e-29	554.47	566.64	172.55	195.11
chr16	79225576	79226364	789	*	9.55977	8.88292	10.0186	-1.1223	1.6667e-31	2.45259e-29	481.55	462.63	1051.39	1023.25
chr1	17198942	17200265	1324	*	7.43962	8.2214	5.60699	2.48041	1.67058e-31	2.45637e-29	276.55	320.38	55.98	41.49
chr4	173995421	173996074	654	*	9.66101	8.98164	10.121	-1.12813	1.705e-31	2.50501e-29	544.84	466.22	1116.57	1110.65
chr9	73168508	73169610	1103	*	10.3637	9.85698	10.7379	-0.871564	1.70746e-31	2.50667e-29	888.8	965.91	1705.53	1710.12
chr1	222694614	222695724	1111	*	9.66091	9.01118	10.1073	-1.08429	1.72963e-31	2.53722e-29	531.08	500.89	1110.44	1095.64
chr8	56522231	56523303	1073	*	10.066	9.50947	10.4666	-0.947095	1.76484e-31	2.58685e-29	723.7	734	1385.75	1444.38
chr2	72993031	72993565	535	*	8.7377	7.74551	9.32004	-1.53557	1.78733e-31	2.61777e-29	200.87	228.33	625	653.32
chr2	171742768	171743336	569	*	8.69428	7.67823	9.28456	-1.56533	1.83936e-31	2.69186e-29	188.49	221.16	631.91	615.36
chr1	17390003	17390788	786	*	10.1507	9.54508	10.5759	-1.01668	1.89203e-31	2.76679e-29	682.42	811.7	1577.47	1475.28
chr8	96804798	96805541	744	*	10.2266	9.70378	10.6095	-0.89666	1.96172e-31	2.86646e-29	813.13	854.73	1574.4	1550.32
chr8	82968374	82969123	750	*	9.1235	8.28584	9.65002	-1.3375	1.97198e-31	2.87921e-29	293.06	331.13	822.86	783.99
chr16	88992774	88993117	344	*	7.8018	8.50697	6.3661	2.06758	1.9925e-31	2.90691e-29	352.22	375.37	76.69	88.29
chrX	45207016	45208058	1043	*	8.49001	7.38865	9.10724	-1.67157	2.00254e-31	2.91929e-29	158.22	176.92	558.29	544.73
chr5	134773571	134774496	926	*	10.3069	9.8051	10.6784	-0.866034	2.00756e-31	2.92432e-29	899.8	889.4	1631.91	1645.67
chr22	17046284	17046900	617	*	6.71893	7.66923	2.83469	4.62197	2.03542e-31	2.96261e-29	214.63	192.46	10.74	3.53
chr11	2905726	2907545	1820	*	11.0408	11.3501	10.6465	0.699553	2.07428e-31	3.01683e-29	2611.36	2609.63	1551.39	1654.5
chr9	92042583	92042992	410	*	8.58068	9.18398	7.52423	1.62279	2.10321e-31	3.05654e-29	602.62	560.66	163.34	204.83
chr9	121025950	121026742	793	*	8.20257	6.89442	8.87717	-1.92207	2.10593e-31	3.05812e-29	127.95	109.98	442.49	497.94
chr5	28374524	28375210	687	*	8.14603	6.80427	8.82902	-1.96179	2.1429e-31	3.1094e-29	118.32	105.2	483.13	426.43
chr11	86437196	86437994	799	*	10.4697	9.95406	10.8488	-0.884796	2.18574e-31	3.16911e-29	961.72	1022.09	1757.68	1930.84
chr9	444560	445406	847	*	9.42788	8.69368	9.91212	-1.2018	2.19978e-31	3.187e-29	416.88	411.23	1006.14	920.84
chr1	170187382	170188037	656	*	7.78003	6.12974	8.52971	-2.30107	2.21165e-31	3.20172e-29	74.3	65.75	395.71	343.44
chr11	72335634	72336286	653	*	7.89513	8.61461	6.39451	2.13111	2.26536e-31	3.27694e-29	353.59	430.36	95.86	72.4
chr1	155840952	155841793	842	*	8.93618	8.01518	9.49383	-1.45053	2.26847e-31	3.27891e-29	262.79	254.63	763.04	678.93
chr8	11034760	11035857	1098	*	10.0399	9.48313	10.4406	-0.947696	2.28512e-31	3.30043e-29	714.06	717.26	1370.41	1409.06
chr3	177233786	177234787	1002	*	10.8319	10.3825	11.1741	-0.783252	2.29203e-31	3.30786e-29	1260.28	1409.41	2285.29	2336.08
chr9	27355044	27355553	510	*	8.35419	7.16803	8.99622	-1.77984	2.31912e-31	3.34439e-29	151.34	136.28	532.21	489.11
chr2	204648356	204648951	596	*	9.01766	8.16288	9.55077	-1.3609	2.34992e-31	3.3862e-29	277.92	295.27	746.94	753.09
chr9	13721474	13722309	836	*	7.41891	5.28281	8.24471	-2.7976	2.41018e-31	3.47036e-29	46.78	31.08	285.28	321.37
chr9	135116350	135117211	862	*	10.5636	10.9198	10.0895	0.825488	2.46605e-31	3.54809e-29	1851.89	2022.67	1067.49	1111.54
chr1	12507032	12508449	1418	*	9.23045	8.45014	9.73406	-1.26199	2.51337e-31	3.61339e-29	338.46	361.02	862.74	840.49
chr7	43521720	43523150	1431	*	7.97546	6.50312	8.68881	-2.09645	2.51905e-31	3.61878e-29	79.8	101.61	398.01	427.31
chr17	79370315	79371080	766	*	9.59355	10.0393	8.94521	1.07942	2.52262e-31	3.62114e-29	1052.52	1051.98	509.97	475.87
chr8	125739322	125741221	1900	*	9.40202	9.87294	8.69836	1.1604	2.53982e-31	3.64304e-29	909.43	965.91	402.61	428.19
chr11	86429071	86429568	498	*	8.32056	6.98877	9.00109	-1.94968	2.54564e-31	3.64859e-29	132.08	121.93	573.62	451.15
chr1	247505699	247506581	883	*	10.0788	9.51791	10.4816	-0.954405	2.60698e-31	3.73366e-29	725.07	741.17	1476.24	1383.46
chr19	13202049	13202697	649	*	9.46926	8.73562	9.95326	-1.1965	2.61236e-31	3.73851e-29	393.49	459.05	1005.38	977.34
chr6	102278063	102279022	960	*	8.59086	7.48316	9.21001	-1.68829	2.64483e-31	3.78209e-29	203.63	154.21	574.39	610.06
chr5	138781206	138781785	580	*	8.52207	7.41996	9.13952	-1.6722	2.65514e-31	3.79394e-29	159.6	182.9	585.89	542.08
chrX	40331092	40331625	534	*	9.25124	8.4781	9.75189	-1.25166	2.88598e-31	4.12064e-29	342.59	370.58	862.74	861.68
chr1	232020700	232021687	988	*	9.59452	8.87708	10.0715	-1.17341	3.17507e-31	4.52995e-29	425.14	515.23	1088.2	1063.86
chr1	115764930	115765727	798	*	9.77901	9.1671	10.2073	-1.02847	3.31085e-31	4.72009e-29	572.35	577.39	1189.43	1175.1
chr8	143858330	143859466	1137	*	9.67183	10.105	9.04986	1.04193	3.33569e-31	4.75189e-29	1117.19	1085.45	539.11	520.89
chr4	37891703	37893501	1799	*	9.57199	10.0233	8.91156	1.09921	3.38114e-31	4.81298e-29	994.74	1086.65	479.3	483.81
chr4	101658184	101658727	544	*	8.97552	8.09672	9.5177	-1.39709	3.43942e-31	4.89222e-29	291.68	255.82	732.37	733.67
chr14	50011671	50012697	1027	*	8.32561	7.11491	8.97449	-1.81063	3.55358e-31	5.05077e-29	154.09	123.13	493.1	512.95
chr7	73695262	73695689	428	*	9.11565	9.62436	8.32286	1.27979	3.59961e-31	5.11232e-29	760.84	817.68	330.52	309.89
chr4	7813429	7814231	803	*	9.53763	8.85599	9.99868	-1.12928	3.66807e-31	5.20561e-29	476.04	450.68	1041.42	1004.71
chr1	230962920	230963441	522	*	8.63868	7.61673	9.23089	-1.5737	3.84697e-31	5.45536e-29	185.74	206.81	611.97	589.76
chr18	14985570	14986314	745	*	7.79931	6.06803	8.56383	-2.37768	4.16491e-31	5.90177e-29	66.04	68.14	331.29	425.54
chr1	184453616	184454162	547	*	8.35066	7.1316	9.00183	-1.82001	4.17977e-31	5.91836e-29	151.34	129.11	546.78	478.52
chr10	50776214	50776693	480	*	9.85678	9.25523	10.28	-1.01498	4.21806e-31	5.96807e-29	623.26	598.91	1274.55	1212.18
chr2	150339461	150340181	721	*	8.64374	7.61979	9.2366	-1.57516	4.2395e-31	5.99387e-29	182.99	210.4	609.67	596.82
chr2	62777592	62778079	488	*	8.47634	7.37371	9.09395	-1.67881	4.27704e-31	6.04239e-29	177.48	154.21	537.58	555.33
chr3	142957905	142958304	400	*	8.23494	6.94784	8.90417	-1.90229	4.38259e-31	6.18684e-29	141.71	105.2	488.5	469.69
chr1	19212341	19213073	733	*	9.55171	8.87611	10.01	-1.11755	4.47477e-31	6.31222e-29	456.78	482.95	1022.25	1040.02
chr1	163172565	163173329	765	*	9.2434	8.43527	9.75829	-1.30055	4.53901e-31	6.39434e-29	338.46	353.85	917.18	814.89
chr7	151493397	151494215	819	*	8.01345	8.67986	6.73727	1.87869	4.53981e-31	6.39434e-29	411.38	408.84	112.73	100.65
chr2	221939730	221940396	667	*	9.40443	8.689	9.88053	-1.17601	4.65348e-31	6.54952e-29	423.76	401.67	949.39	935.84
chr21	38125595	38126345	751	*	9.86668	9.27511	10.285	-0.998043	4.87427e-31	6.85513e-29	606.75	632.38	1246.94	1248.38
chr5	111444962	111445585	624	*	8.18617	6.84489	8.86904	-1.95181	4.96662e-31	6.97978e-29	103.19	126.72	500.77	434.37
chr7	36071939	36072489	551	*	8.28927	7.09482	8.93363	-1.78795	5.02701e-31	7.05936e-29	143.09	130.3	486.2	491.76
chr11	46315151	46315650	500	*	10.6591	11.0013	10.2096	0.785225	5.20877e-31	7.30912e-29	2000.48	2099.18	1223.17	1145.08
chr1	41940122	41940983	862	*	9.67789	8.98078	10.1459	-1.14465	5.37824e-31	7.54128e-29	458.16	552.29	1105.84	1160.09
chr9	84173004	84173675	672	*	8.98555	8.12276	9.52172	-1.37182	5.52245e-31	7.73771e-29	276.55	280.93	717.03	753.09
chr16	2523656	2525876	2221	*	11.4381	11.7118	11.1002	0.607654	5.58781e-31	7.82344e-29	3297.91	3410.57	2206.31	2184.22
chr20	61854077	61854380	304	*	8.15669	6.82523	8.83714	-1.93737	5.66529e-31	7.926e-29	97.69	129.11	460.89	453.8
chr10	70359732	70360547	816	*	10.521	10.0508	10.875	-0.816384	5.90908e-31	8.26047e-29	1026.38	1095.02	1894.19	1861.98
chr22	42372263	42373436	1174	*	8.88172	9.42235	8.00707	1.38761	5.91318e-31	8.26047e-29	719.57	652.71	252.3	262.21
chr11	47989146	47989770	625	*	8.25047	7.01102	8.90716	-1.83996	5.9588e-31	8.31801e-29	134.83	123.13	457.83	502.35
chr5	88250353	88250837	485	*	8.22888	6.92232	8.90309	-1.91178	6.04177e-31	8.42755e-29	108.69	133.89	510.74	446.73
chr9	82379071	82379916	846	*	9.51301	8.81608	9.98094	-1.1509	6.62626e-31	9.23597e-29	474.67	426.77	990.81	1030.31
chr2	237677202	237677793	592	*	10.0991	9.52322	10.5095	-0.974205	6.82594e-31	9.50723e-29	693.43	778.23	1504.61	1410.83
chr7	29645860	29646536	677	*	9.46553	8.74042	9.94584	-1.18942	6.8968e-31	9.59878e-29	433.39	421.99	1037.58	934.96
chr10	92346591	92347574	984	*	9.43319	8.72774	9.9049	-1.15947	7.20534e-31	1.00208e-28	412.75	435.14	964.73	952.62
chr10	17067407	17068216	810	*	10.8579	10.4429	11.1798	-0.730363	7.32603e-31	1.01781e-28	1366.22	1417.78	2286.83	2352.85
chrX	139805257	139807248	1992	*	7.17595	8.00184	5.03909	2.78226	7.32935e-31	1.01781e-28	290.3	222.35	32.21	33.55
chr4	103932586	103933562	977	*	9.83832	9.23193	10.2639	-1.01955	7.38372e-31	1.02461e-28	583.36	619.23	1258.45	1200.71
chr6	39460651	39461407	757	*	9.69278	9.05628	10.1329	-1.06537	7.53069e-31	1.04423e-28	553.09	511.65	1117.34	1128.31
chr16	66311749	66312409	661	*	7.66844	5.90762	8.43814	-2.39909	7.71809e-31	1.06942e-28	49.53	70.53	334.36	359.33
chr18	20143956	20144530	575	*	8.57905	7.5368	9.17782	-1.60244	8.21641e-31	1.13763e-28	188.49	182.9	601.23	557.09
chr7	82725368	82725991	624	*	8.2868	7.06609	8.93841	-1.81323	8.34475e-31	1.15454e-28	129.33	138.67	464.73	516.48
chr17	8023404	8024322	919	*	10.5463	10.8928	10.0893	0.796476	8.52766e-31	1.17898e-28	1960.58	1842.16	1080.53	1098.29
chr19	46701960	46702926	967	*	10.1316	9.54641	10.5467	-0.986031	8.60763e-31	1.18916e-28	683.8	811.7	1485.44	1506.18
chr18	28881051	28881903	853	*	9.26281	8.5046	9.75725	-1.23142	8.90425e-31	1.22923e-28	352.22	374.17	861.2	869.63
chr16	65692062	65693184	1123	*	11.3548	11.0001	11.6392	-0.635762	8.94176e-31	1.2335e-28	2092.66	2003.54	3233.92	3145.67
chr3	120626796	120627652	857	*	9.10149	9.60704	8.31645	1.26938	8.97809e-31	1.2376e-28	753.96	805.72	325.92	311.65
chr9	35521788	35522162	375	*	8.67734	7.65936	9.26825	-1.56579	9.08509e-31	1.25143e-28	184.36	219.96	602	631.25
chr17	25690913	25691650	738	*	10.6616	10.2224	10.9978	-0.768846	9.10497e-31	1.25325e-28	1173.6	1215.75	2058.3	2031.49
chr6	30853452	30854643	1192	*	11.126	10.7533	11.4219	-0.663582	9.32248e-31	1.28225e-28	1712.93	1739.35	2752.32	2735.14
chr8	69615696	69616206	511	*	8.32549	7.12719	8.97092	-1.78497	9.45319e-31	1.29927e-28	126.58	153.02	515.34	488.23
chr17	39686199	39687442	1244	*	11.1315	10.7337	11.4429	-0.702358	9.62299e-31	1.32164e-28	1620.75	1784.78	2786.06	2781.93
chr5	67069173	67070269	1097	*	10.0915	9.51353	10.503	-0.980835	9.81749e-31	1.34737e-28	773.23	688.57	1398.02	1504.41
chr2	17033837	17034522	686	*	7.84984	6.33494	8.57237	-2.14947	9.89235e-31	1.35665e-28	82.55	78.9	365.8	395.53
chr16	28079143	28079727	585	*	8.90689	7.99752	9.46033	-1.43113	1.00523e-30	1.37758e-28	242.15	268.97	730.83	678.05
chr5	43425977	43426627	651	*	9.83915	9.23104	10.2656	-1.024	1.04327e-30	1.42867e-28	623.26	578.59	1198.63	1263.39
chr5	151064210	151065038	829	*	10.7545	10.3074	11.0953	-0.780003	1.08347e-30	1.48264e-28	1203.87	1330.52	2210.14	2165.68
chr5	129239612	129241114	1503	*	10.7643	11.1234	10.2851	0.829517	1.10545e-30	1.5116e-28	2227.5	2234.26	1339.73	1155.68
chr1	242927021	242927854	834	*	10.0302	9.43898	10.4484	-0.996289	1.11385e-30	1.52198e-28	649.4	738.78	1440.19	1354.32
chr5	30849871	30850468	598	*	9.49822	8.8194	9.95798	-1.12355	1.11929e-30	1.5283e-28	454.03	449.48	991.57	997.64
chr4	166893869	166894335	467	*	8.63563	7.51846	9.25762	-1.68487	1.16341e-30	1.58739e-28	152.72	213.98	632.67	591.52
chr22	27812630	27813417	788	*	9.77656	9.14445	10.2146	-1.06044	1.19957e-30	1.63553e-28	599.87	531.97	1215.5	1160.98
chr14	21081285	21082456	1172	*	11.7368	11.9939	11.4237	0.566701	1.23634e-30	1.68444e-28	4091.77	4065.67	2684.84	2809.3
chr11	127760600	127761238	639	*	8.8361	7.90918	9.39586	-1.4578	1.23814e-30	1.68567e-28	247.65	233.11	700.16	647.14
chr10	19207200	19207973	774	*	10.4987	10.0375	10.8476	-0.804066	1.25946e-30	1.71344e-28	1060.78	1041.22	1855.08	1830.19
chr3	48884437	48885675	1239	*	11.6228	11.8883	11.297	0.587576	1.27277e-30	1.73031e-28	3695.53	3886.35	2539.13	2493.23
chr1	38512111	38513300	1190	*	11.5915	11.8643	11.2548	0.604215	1.2797e-30	1.73846e-28	3751.93	3704.65	2524.56	2362.56
chr5	28961847	28962525	679	*	8.17065	6.77589	8.86637	-2.02463	1.29064e-30	1.75206e-28	130.71	88.46	436.35	497.06
chr6	7805993	7806620	628	*	8.76058	7.78971	9.33571	-1.51431	1.29316e-30	1.75421e-28	229.77	212.79	678.69	613.6
chrX	135771314	135772108	795	*	8.72905	7.74057	9.31016	-1.53886	1.31969e-30	1.78891e-28	235.27	192.46	641.88	627.72
chr1	80176799	80177357	559	*	8.72025	7.73126	9.30152	-1.53873	1.36214e-30	1.84511e-28	232.52	192.46	621.94	640.08
chr2	47797078	47799031	1954	*	9.65506	10.0952	9.01846	1.06491	1.43902e-30	1.94784e-28	1040.14	1147.62	520.71	516.48
chr8	129402983	129403756	774	*	9.4209	8.6978	9.90034	-1.18168	1.52466e-30	2.06227e-28	389.36	441.11	946.33	964.98
chr3	21488842	21489792	951	*	9.35761	8.57331	9.86285	-1.26309	1.53407e-30	2.07351e-28	339.83	421.99	920.25	942.02
chr7	124332302	124332913	612	*	8.21704	6.99248	8.86971	-1.81989	1.58843e-30	2.14544e-28	127.95	126.72	457.06	478.52
chr15	68135989	68136582	594	*	9.3255	8.56916	9.81915	-1.22978	1.65869e-30	2.23872e-28	368.73	390.91	943.26	863.45
chr2	56219362	56220214	853	*	10.5403	10.0837	10.8866	-0.795493	1.70377e-30	2.29791e-28	1062.15	1108.17	1887.28	1899.06
chr2	99346888	99348214	1327	*	10.3574	10.7167	9.87785	0.830626	1.7497e-30	2.35816e-28	1708.8	1656.87	960.9	920.84
chr22	27287334	27287736	403	*	8.19546	6.85925	8.87707	-1.95924	1.767e-30	2.37977e-28	138.96	93.24	466.26	474.1
chr21	29483482	29484045	564	*	8.54415	7.48833	9.14725	-1.61344	1.77773e-30	2.3925e-28	167.85	191.27	557.52	576.52
chr14	32399732	32400444	713	*	8.80316	7.87611	9.36296	-1.45451	1.80912e-30	2.43299e-28	228.39	241.48	673.32	643.61
chr12	16132551	16133234	684	*	8.78252	7.84305	9.34673	-1.46969	1.85553e-30	2.49362e-28	220.14	239.09	665.65	636.55
chr7	95848604	95849208	605	*	9.44974	8.75954	9.91465	-1.13874	1.86531e-30	2.50479e-28	429.26	437.53	966.26	964.1
chr10	29023599	29024429	831	*	10.4718	10.0078	10.8224	-0.807625	1.86651e-30	2.50479e-28	1025.01	1034.05	1798.33	1823.13
chr6	13508790	13509670	881	*	8.69448	7.67234	9.28675	-1.57189	1.87491e-30	2.51426e-28	193.99	213.98	584.36	664.8
chr9	18888234	18888730	497	*	8.29068	7.06061	8.94484	-1.82654	1.88458e-30	2.52542e-28	130.71	136.28	529.15	456.44
chr4	10181886	10182554	669	*	8.55759	7.52422	9.15351	-1.59176	1.92861e-30	2.58257e-28	191.24	176.92	577.46	561.51
chr6	24980657	24982102	1446	*	10.8579	10.4452	11.1785	-0.72657	1.94515e-30	2.60286e-28	1363.46	1424.96	2286.06	2349.32
chr10	78251639	78252473	835	*	9.45717	8.70249	9.95012	-1.22597	1.95936e-30	2.62001e-28	410	423.18	917.18	1061.21
chr22	30631576	30632408	833	*	11.5718	11.2085	11.8617	-0.646787	2.04403e-30	2.73128e-28	2235.75	2497.26	3737.76	3705.41
chr9	5611308	5612400	1093	*	8.248	6.99274	8.90891	-1.84842	2.06424e-30	2.75632e-28	110.07	144.65	479.3	482.05
chr7	136766284	136766841	558	*	7.88509	6.43254	8.59406	-2.07969	2.21058e-30	2.94962e-28	86.68	86.07	388.81	384.05
chr11	127789048	127790127	1080	*	9.31414	8.54806	9.81186	-1.2465	2.2178e-30	2.95715e-28	403.12	345.48	875.01	922.6
chr2	122712789	122713764	976	*	8.50097	7.42129	9.11154	-1.64825	2.29241e-30	3.05447e-28	180.24	162.58	530.68	575.63
chr6	146660829	146661610	782	*	8.75801	7.75382	9.34437	-1.55891	2.35978e-30	3.142e-28	238.02	193.66	685.59	614.48
chr20	24843819	24844561	743	*	8.635	7.57117	9.24063	-1.624	2.43488e-30	3.23968e-28	174.73	205.61	645.71	564.15
chr20	2672739	2674393	1655	*	8.84653	9.37925	7.9928	1.36125	2.46286e-30	3.27458e-28	657.65	674.22	250.77	258.68
chr1	145682898	145683779	882	*	9.90279	9.33065	10.3114	-0.970686	2.46987e-30	3.28159e-28	649.4	638.36	1263.81	1277.52
chr2	151487209	151487846	638	*	8.4885	7.39591	9.10305	-1.66645	2.48686e-30	3.30182e-28	180.24	156.6	573.62	526.19
chr2	48950210	48950799	590	*	9.0378	8.13102	9.5903	-1.42429	2.60211e-30	3.45239e-28	246.28	314.4	798.32	743.38
chr3	111456416	111456964	549	*	9.5979	8.92741	10.0539	-1.10859	2.61703e-30	3.46973e-28	460.91	512.84	1039.12	1086.81
chr16	3225350	3225965	616	*	7.87932	8.55893	6.55123	1.9376	2.65498e-30	3.51756e-28	382.49	371.78	96.63	90.94
chr10	64344049	64344432	384	*	7.71343	6.05439	8.46477	-2.29275	2.72689e-30	3.60948e-28	56.41	76.51	348.16	358.45
chr22	49979936	49980463	528	*	6.73595	7.62705	3.95407	3.39339	2.72821e-30	3.60948e-28	198.12	197.25	16.87	14.13
chr8	95260682	95261461	780	*	8.65833	7.67362	9.23815	-1.52684	2.82366e-30	3.73312e-28	196.75	211.59	612.73	595.06
chr6	21026819	21027402	584	*	8.87675	7.97804	9.42631	-1.42154	2.83543e-30	3.74604e-28	262.79	241.48	708.59	667.45
chr5	32814672	32815132	461	*	7.95343	6.54902	8.65141	-2.02219	2.85593e-30	3.77047e-28	88.05	99.22	403.38	400.82
chr3	101881801	101882605	805	*	9.5403	8.87715	9.9929	-1.10206	2.85928e-30	3.77224e-28	480.17	460.24	1013.81	1024.13
chr8	62633984	62635321	1338	*	10.6781	10.2151	11.0281	-0.80423	2.89482e-30	3.81474e-28	1118.56	1258.79	2108.91	2067.69
chr8	42575339	42576317	979	*	10.092	9.53995	10.4902	-0.938664	2.89556e-30	3.81474e-28	705.81	783.01	1450.93	1425.84
chr5	80441896	80443347	1452	*	8.09965	6.7282	8.78985	-1.9905	3.03461e-30	3.99512e-28	112.82	99.22	404.91	480.28
chr8	144296454	144296691	238	*	7.73407	8.4506	6.24716	2.11543	3.05709e-30	4.02188e-28	321.95	377.76	81.29	70.63
chr4	33087920	33088781	862	*	7.57354	5.72559	8.35781	-2.48317	3.10506e-30	4.08213e-28	41.28	64.55	325.92	330.19
chrX	2002669	2003163	495	*	6.77968	7.66627	4.05428	3.35209	3.23245e-30	4.24662e-28	217.38	188.88	13.8	19.42
chr15	41244881	41246087	1207	*	11.2691	11.5526	10.916	0.631462	3.244e-30	4.25882e-28	3068.14	2939.57	1925.63	1938.79
chr7	103591765	103592343	579	*	7.63192	5.89264	8.39786	-2.39223	3.27136e-30	4.29173e-28	67.42	51.4	320.55	354.03
chr8	224141	224854	714	*	10.6987	10.2656	11.0313	-0.758876	3.40044e-30	4.45795e-28	1198.36	1263.57	2111.98	2073.87
chr11	41338219	41338800	582	*	9.39871	8.65981	9.88496	-1.20275	3.40344e-30	4.45877e-28	379.73	429.16	911.05	979.99
chr3	82149536	82150014	479	*	8.06342	6.7427	8.74119	-1.92827	3.4157e-30	4.4717e-28	101.81	112.37	435.59	420.25
chr17	36173262	36173921	660	*	10.2505	9.74496	10.6241	-0.872656	3.72952e-30	4.87914e-28	880.54	835.61	1598.17	1558.27
chr6	156748389	156748944	556	*	9.69902	9.0368	10.1512	-1.10224	3.77974e-30	4.93802e-28	562.72	487.74	1097.4	1176.87
chr2	228017936	228018849	914	*	9.96194	9.40011	10.3653	-0.956504	3.7798e-30	4.93802e-28	696.18	655.1	1312.89	1325.19
chr4	44654931	44655595	665	*	9.17749	8.37856	9.68867	-1.28407	3.83132e-30	5.00185e-28	308.19	357.43	832.06	818.42
chr11	2954583	2955076	494	*	10.3456	10.7004	9.87403	0.819431	3.95062e-30	5.154e-28	1648.26	1679.58	947.09	929.66
chr9	104757424	104757942	519	*	10.0295	9.47076	10.4313	-0.948474	4.11817e-30	5.36886e-28	675.54	743.56	1378.08	1383.46
chr15	67378180	67378707	528	*	9.32917	8.52541	9.8423	-1.28877	4.12239e-30	5.37062e-28	323.32	413.62	930.99	904.94
chr2	17597997	17598755	759	*	9.69558	9.03072	10.149	-1.10754	4.14557e-30	5.39707e-28	565.47	480.56	1167.19	1103.59
chr2	47077888	47078354	467	*	10.2495	9.71892	10.6366	-0.909592	4.27494e-30	5.56163e-28	837.89	847.56	1667.19	1516.77
chr3	36730255	36730803	549	*	7.30203	5.12858	8.13255	-2.82599	4.27859e-30	5.56252e-28	41.28	28.69	287.58	273.69
chr4	65649652	65650327	676	*	8.79076	7.83559	9.36047	-1.4958	4.37356e-30	5.68205e-28	247.65	209.2	682.52	632.14
chr1	106206870	106207578	709	*	9.7742	9.16381	10.2018	-1.02767	4.40944e-30	5.7247e-28	588.86	558.27	1208.6	1146.85
chr11	105589315	105589810	496	*	8.51454	7.43733	9.12434	-1.6486	4.46804e-30	5.79677e-28	191.24	155.41	570.56	545.61
chr11	111432422	111433146	725	*	10.7809	10.3543	11.1098	-0.748211	4.99055e-30	6.47018e-28	1258.9	1359.21	2222.41	2197.47
chr14	36538026	36539153	1128	*	10.2736	9.73526	10.6647	-0.919077	5.15609e-30	6.68018e-28	847.52	857.13	1533.75	1712.77
chr5	136550935	136551836	902	*	8.03494	6.69529	8.71741	-1.95666	5.20672e-30	6.74112e-28	112.82	94.44	417.18	424.66
chr16	89237559	89238227	669	*	10.3333	10.6897	9.85896	0.824649	5.25817e-30	6.80304e-28	1634.51	1668.82	912.58	944.67
chr1	242953707	242954289	583	*	8.42923	7.2572	9.06726	-1.75035	5.43819e-30	7.03109e-28	136.21	169.75	500.77	572.1
chr3	55201061	55201601	541	*	8.08413	6.78477	8.7565	-1.90317	5.44484e-30	7.03484e-28	104.56	115.96	439.42	425.54
chr13	86102591	86103656	1066	*	9.6523	9.02514	10.088	-1.05032	5.64877e-30	7.29329e-28	525.57	516.43	1088.2	1088.58
chr7	73129772	73130410	639	*	11.0146	11.3373	10.5982	0.734759	5.78023e-30	7.45789e-28	2442.13	2732.76	1554.46	1545.91
chr2	237406997	237407499	503	*	9.63641	8.91741	10.1141	-1.17446	5.94126e-30	7.66039e-28	427.89	539.14	1134.98	1081.52
chr7	37947475	37948475	1001	*	8.01992	6.68773	8.70054	-1.94381	6.08857e-30	7.84493e-28	104.56	101.61	411.81	420.25
chr3	14473425	14474286	862	*	11.2025	11.4862	10.8489	0.632675	6.21113e-30	7.99734e-28	2839.75	2897.73	1861.21	1827.54
chr1	66322278	66323167	890	*	9.29643	8.46821	9.81927	-1.32043	6.33849e-30	8.15573e-28	305.44	402.86	907.22	899.65
chr9	75043098	75043726	629	*	7.57985	5.80047	8.35274	-2.43585	6.38656e-30	8.21194e-28	66.04	45.43	323.62	330.19
chr2	157792086	157792535	450	*	8.89876	8.01913	9.44126	-1.39116	6.42064e-30	8.2501e-28	246.28	272.56	695.56	694.82
chr18	21359573	21360359	787	*	10.2169	9.64785	10.624	-0.962617	6.43188e-30	8.25888e-28	730.57	873.86	1605.84	1550.32
chr10	78919440	78920053	614	*	8.88005	7.96501	9.43554	-1.44459	6.47368e-30	8.30687e-28	273.79	225.94	708.59	676.28
chr3	111480127	111480693	567	*	8.58928	7.56216	9.18317	-1.58521	6.65295e-30	8.53107e-28	202.25	175.73	602	560.62
chr16	2748926	2749435	510	*	8.98101	9.52074	8.10877	1.38431	6.71733e-30	8.60774e-28	674.17	794.96	289.88	262.21
chr20	26189689	26190436	748	*	14.1587	14.506	13.7003	0.799037	6.94178e-30	8.88928e-28	24392.4	22143	13152.7	13469.1
chr1	16007203	16008059	857	*	10.0077	9.46354	10.4019	-0.929526	7.14556e-30	9.14398e-28	712.69	699.33	1361.21	1344.61
chr16	48047263	48048033	771	*	9.52075	8.83159	9.98519	-1.13869	7.20097e-30	9.20859e-28	476.04	435.14	974.7	1052.38
chr1	44323887	44324646	760	*	10.4975	10.0187	10.8563	-0.828999	7.77445e-30	9.93519e-28	989.23	1085.45	1893.42	1814.3
chr5	95512937	95513541	605	*	8.95456	8.07269	9.49789	-1.39746	7.91518e-30	1.01081e-27	268.29	270.17	765.34	680.69
chr12	121077961	121079460	1500	*	9.21789	9.71327	8.45743	1.23859	8.18083e-30	1.04403e-27	824.13	854.73	325.16	377.87
chr6	46843725	46844356	632	*	9.9614	9.38196	10.3737	-0.980549	8.34064e-30	1.0637e-27	649.4	684.98	1380.38	1273.1
chr3	186818968	186819981	1014	*	9.36506	8.65654	9.83812	-1.16487	8.59895e-30	1.0959e-27	411.38	395.69	901.85	928.78
chr19	45931974	45932353	380	*	8.73639	9.30371	7.78804	1.48028	8.64796e-30	1.10139e-27	686.55	577.39	217.79	224.25
chr20	48126945	48127736	792	*	9.96509	9.36708	10.3866	-1.008	8.73847e-30	1.11216e-27	645.27	675.42	1414.89	1262.51
chr3	182011977	182012918	942	*	9.17602	8.40203	9.67703	-1.25615	8.76637e-30	1.11496e-27	354.97	321.57	820.56	816.66
chrX	8381231	8381827	597	*	7.79318	6.28156	8.51502	-2.13962	8.93514e-30	1.13565e-27	74.3	81.29	363.5	368.16
chr5	73921557	73922622	1066	*	9.07572	8.24277	9.6004	-1.32936	8.96725e-30	1.13896e-27	280.67	325.16	796.79	755.74
chr14	89461656	89462542	887	*	10.8405	10.4352	11.1565	-0.716321	8.99876e-30	1.14219e-27	1407.49	1361.6	2258.45	2306.94
chr20	32497089	32497872	784	*	9.9385	9.3719	10.3443	-0.961038	9.09843e-30	1.15406e-27	642.52	682.59	1319.8	1280.16
chr9	98584881	98585862	982	*	9.64211	9.00019	10.0848	-1.07337	9.46025e-30	1.19914e-27	535.2	488.93	1108.14	1063.86
chr10	72730538	72731015	478	*	7.79285	6.28824	8.51319	-2.13605	9.58608e-30	1.21427e-27	79.8	76.51	369.63	361.09
chr2	237491253	237493495	2243	*	7.82088	6.23609	8.55782	-2.2332	9.69456e-30	1.22718e-27	92.18	58.58	369.63	384.05
chr11	90896718	90897531	814	*	9.16233	8.3919	9.66186	-1.24934	1.00708e-29	1.27396e-27	337.08	334.72	822.86	797.23
chr19	1445025	1446440	1416	*	10.7644	11.0845	10.3524	0.725405	1.04117e-29	1.31618e-27	2215.11	2127.87	1328.23	1286.34
chr9	84636059	84636589	531	*	8.92049	8.03944	9.46352	-1.39304	1.06141e-29	1.34033e-27	247.65	278.54	727.77	684.23
chr2	122835963	122836488	526	*	8.4171	7.32847	9.03043	-1.65371	1.0617e-29	1.34033e-27	154.09	167.36	516.11	529.72
chr12	79669302	79669841	540	*	8.42126	7.34238	9.03159	-1.64337	1.06762e-29	1.34689e-27	159.6	164.97	522.24	524.43
chr11	86229890	86230880	991	*	9.4653	8.76011	9.93689	-1.15691	1.07526e-29	1.35562e-27	404.5	462.63	1001.54	958.8
chr1	110692924	110693709	786	*	9.93483	10.3295	9.3897	0.929669	1.12885e-29	1.42223e-27	1283.67	1289.87	685.59	655.97
chr19	55885334	55886121	788	*	9.80835	10.2172	9.23563	0.970766	1.14345e-29	1.43966e-27	1172.22	1208.58	615.04	590.64
chr1	242168244	242169017	774	*	10.0515	9.5195	10.4394	-0.911167	1.16776e-29	1.46927e-27	737.45	730.41	1391.88	1385.23
chr13	67247359	67247986	628	*	8.51932	7.42394	9.13473	-1.65777	1.17692e-29	1.4798e-27	148.59	194.86	569.79	554.44
chr11	23134476	23135471	996	*	8.75181	7.82357	9.31203	-1.45455	1.18763e-29	1.49228e-27	218.76	234.3	642.64	628.6
[truncated: 185,980 more rows]

## Sheet: HFF_HCMV_opened_chromatin
Chr	Start	End
[truncated: 49,003 more rows]

[truncated: 8 more sheets: HFF_HCMV_closed_chromatin, HFF_unchanged_chromatin, ARPE_HCMV_opened_chromatin, ARPE_HCMV_closed_chromatin, ARPE_unchanged_chromatin, HOMER_Rank, HOMER_-log10pval, HOMER_%_Target_Sequences]
