# Supplementary material for: Human cytomegalovirus infection coopts chromatin organization to diminish TEAD1 transcription factor activity
Source: bioRxiv preprint, doi:10.1101/2024.04.12.588762, version 4 (2025-06-02)
Supplement: Supplemental Dataset 5 [file 588762_file21.xlsx]

## Sheet: README
Human cytomegalovirus extensively re-organizes the human genome, diminishing TEAD1 transcription factor activity
This document contains the loops from HiChIP data
Comments, additions, or subtractions should be addressed to the corresponding authors:
Leah Kottyan (Leah.Kottyan@cchmc.org)
Matt Weirauch (Matthew.Weirauch@cchmc.org)
Hg19 genome build was used for analysis.
The first tab contains loops with FDR < 0.01 in uninfected cells
The second tab contains loops with FDR < 0.01 in HCMV infected cells
The third tab contains loops that are present only in uninfected cells
The fourth tab contains loops that are present only in HCMV infected cells
The columns in the tabs are:
chr1	Left bin chromosome
s1	Left bin start position
e1	Left bin end position
chr2	Right bin chromosome
s2	Right bin start position
e2	Right bin end position
cc	contact count of the interactions in the bins
P-Value_Bias	p-value of the interactions in the bins
Q-Value_Bias	q-value of the interactions in the bins
bin1_low	lower coordinates of the first set of interacting bins (x axis of the proposed connected component model)
bin1_high	upper coordinates of the first set of interacting bins (x axis of the proposed connected component model)
bin2_low	lower coordinates of the second set of interacting bins (x axis of the proposed connected component model)
bin2_high	upper coordinates of the second set of interacting bins (x axis of the proposed connected component model)
sumCC	sum of contact counts of all the significant interactions applied to the connected component model, with respect to the current retained interaction
StrongConn	StrongConn is between 0 and 1, and denotes the fraction of all possible interactions within the connected component which are significant. Higher value of StrongConn indicates dense connected region.
loop_name	The name of the loop
For more details, see https://ay-lab.github.io/FitHiChIP/html/usage/output.html#details-of-merge-filtering-output

## Sheet: Uninfected loops - FDR < 0.01
chr1	s1	e1	chr2	s2	e2	cc	P-Value_Bias	Q-Value_Bias	bin1_low	bin1_high	bin2_low	bin2_high	sumCC	StrongConn	loop_name
chr1	234740000	234750000	chr1	235110000	235120000	286	3.28456539993923e-276	2.50921370697135e-270	234610000	234920000	234930000	235200000	15090	0.451613	UI_1
chr1	234850000	234860000	chr1	235110000	235120000	198	2.04867440918989e-128	1.27389099873746e-123	234610000	234920000	234930000	235200000	15090	0.451613	UI_2
chr1	234630000	234640000	chr1	235110000	235120000	123	3.89255286687953e-114	1.61362490040192e-109	234610000	234920000	234930000	235200000	15090	0.451613	UI_3
chr1	234660000	234670000	chr1	235110000	235120000	98	6.15458162631356e-78	7.51419053441362e-74	234610000	234920000	234930000	235200000	15090	0.451613	UI_4
chr1	234740000	234750000	chr1	235180000	235190000	100	6.57781418837448e-77	7.63852922135782e-73	234610000	234920000	234930000	235200000	15090	0.451613	UI_5
chr1	234740000	234750000	chr1	235150000	235160000	97	4.56001993534998e-74	4.76271460273407e-70	234610000	234920000	234930000	235200000	15090	0.451613	UI_6
chr1	234740000	234750000	chr1	235050000	235060000	84	3.09981487415937e-49	1.02832051015176e-45	234610000	234920000	234930000	235200000	15090	0.451613	UI_7
chr1	234850000	234860000	chr1	235050000	235060000	94	1.83092204983216e-44	4.59133088899122e-41	234610000	234920000	234930000	235200000	15090	0.451613	UI_8
chr1	234790000	234800000	chr1	235110000	235120000	83	2.39531369548731e-44	5.96467799003314e-41	234610000	234920000	234930000	235200000	15090	0.451613	UI_9
chr1	234850000	234860000	chr1	235180000	235190000	78	1.11421996442373e-43	2.67312116764148e-40	234610000	234920000	234930000	235200000	15090	0.451613	UI_10
chr1	234740000	234750000	chr1	235080000	235090000	76	4.89854178884597e-40	9.52732260063562e-37	234610000	234920000	234930000	235200000	15090	0.451613	UI_11
chr1	234850000	234860000	chr1	235150000	235160000	71	6.19254546361181e-38	1.05344900351755e-34	234610000	234920000	234930000	235200000	15090	0.451613	UI_12
chr1	234740000	234750000	chr1	234980000	234990000	78	1.46833027433762e-36	2.27825980514262e-33	234610000	234920000	234930000	235200000	15090	0.451613	UI_13
chr1	234630000	234640000	chr1	235140000	235150000	47	3.56978024897484e-35	5.05687599536274e-32	234610000	234920000	234930000	235200000	15090	0.451613	UI_14
chr1	234650000	234660000	chr1	235180000	235190000	50	4.65376483149001e-35	6.53015157705807e-32	234610000	234920000	234930000	235200000	15090	0.451613	UI_15
chr1	234900000	234910000	chr1	235110000	235120000	88	2.67312228480397e-32	3.08808626193686e-29	234610000	234920000	234930000	235200000	15090	0.451613	UI_16
chr1	234740000	234750000	chr1	235010000	235020000	63	9.71426999591836e-30	9.31967962511537e-27	234610000	234920000	234930000	235200000	15090	0.451613	UI_17
chr1	234630000	234640000	chr1	235050000	235060000	43	6.48936916828312e-27	4.96068325539882e-24	234610000	234920000	234930000	235200000	15090	0.451613	UI_18
chr1	234850000	234860000	chr1	235020000	235030000	69	2.36751941416889e-24	1.44617210279716e-21	234610000	234920000	234930000	235200000	15090	0.451613	UI_19
chr1	234710000	234720000	chr1	235110000	235120000	46	1.88161844619261e-21	8.742824276828e-19	234610000	234920000	234930000	235200000	15090	0.451613	UI_20
chr1	234660000	234670000	chr1	235050000	235060000	35	3.7197735088446e-18	1.22028150046428e-15	234610000	234920000	234930000	235200000	15090	0.451613	UI_21
chr1	234620000	234630000	chr1	235180000	235190000	29	5.04540844989874e-18	1.63144005266418e-15	234610000	234920000	234930000	235200000	15090	0.451613	UI_22
chr1	234860000	234870000	chr1	234990000	235000000	67	1.53808827116702e-17	4.71039676182286e-15	234610000	234920000	234930000	235200000	15090	0.451613	UI_23
chr1	234900000	234910000	chr1	235180000	235190000	42	5.89767968267504e-16	1.49936291823231e-13	234610000	234920000	234930000	235200000	15090	0.451613	UI_24
chr1	234630000	234640000	chr1	234980000	234990000	31	1.47050173836367e-14	3.14187206946051e-12	234610000	234920000	234930000	235200000	15090	0.451613	UI_25
chr1	234660000	234670000	chr1	235150000	235160000	27	6.61899963212322e-14	1.29597502075085e-11	234610000	234920000	234930000	235200000	15090	0.451613	UI_26
chr1	234680000	234690000	chr1	235180000	235190000	27	2.82160659445166e-13	5.06182157133664e-11	234610000	234920000	234930000	235200000	15090	0.451613	UI_27
chr1	234820000	234830000	chr1	235110000	235120000	46	6.22227621910824e-12	9.18630018012401e-10	234610000	234920000	234930000	235200000	15090	0.451613	UI_28
chr1	234780000	234790000	chr1	235140000	235150000	25	7.7750687690378e-12	1.13090844276741e-09	234610000	234920000	234930000	235200000	15090	0.451613	UI_29
chr1	234740000	234750000	chr1	234940000	234950000	37	8.10062706894229e-12	1.17503390400631e-09	234610000	234920000	234930000	235200000	15090	0.451613	UI_30
chr1	234850000	234860000	chr1	235080000	235090000	45	3.23727076635781e-10	3.63022031318573e-08	234610000	234920000	234930000	235200000	15090	0.451613	UI_31
chr1	234900000	234910000	chr1	235140000	235150000	31	7.25137057052191e-10	7.64868983860014e-08	234610000	234920000	234930000	235200000	15090	0.451613	UI_32
chr1	234660000	234670000	chr1	235010000	235020000	24	8.94015729144028e-10	9.28333753461309e-08	234610000	234920000	234930000	235200000	15090	0.451613	UI_33
chr1	234890000	234900000	chr1	235040000	235050000	32	2.33510305920361e-09	2.24979765743681e-07	234610000	234920000	234930000	235200000	15090	0.451613	UI_34
chr1	234810000	234820000	chr1	235180000	235190000	23	2.39240323535468e-09	2.30050745302046e-07	234610000	234920000	234930000	235200000	15090	0.451613	UI_35
chr1	234630000	234640000	chr1	235020000	235030000	21	1.78473135303628e-08	1.45588851982059e-06	234610000	234920000	234930000	235200000	15090	0.451613	UI_36
chr1	234680000	234690000	chr1	234980000	234990000	24	2.92575384917409e-08	2.28571516775595e-06	234610000	234920000	234930000	235200000	15090	0.451613	UI_37
chr1	234630000	234640000	chr1	235080000	235090000	20	2.87210560484619e-07	1.82355867033904e-05	234610000	234920000	234930000	235200000	15090	0.451613	UI_38
chr1	234710000	234720000	chr1	235180000	235190000	19	5.28075063645757e-07	3.1609292939787e-05	234610000	234920000	234930000	235200000	15090	0.451613	UI_39
chr1	234710000	234720000	chr1	235140000	235150000	18	7.76876298437976e-07	4.47777536526107e-05	234610000	234920000	234930000	235200000	15090	0.451613	UI_40
chr1	234660000	234670000	chr1	235080000	235090000	18	1.73574122504962e-05	0.000713143	234610000	234920000	234930000	235200000	15090	0.451613	UI_41
chr1	91970000	91980000	chr1	92390000	92400000	49	1.24398528792814e-37	2.07334215674941e-34	91960000	92090000	92140000	92420000	6216	0.604396	UI_42
chr1	92030000	92040000	chr1	92350000	92360000	59	2.90896761724989e-36	4.42307492307616e-33	91960000	92090000	92140000	92420000	6216	0.604396	UI_43
chr1	91980000	91990000	chr1	92350000	92360000	54	1.48799803363411e-33	1.89051970840801e-30	91960000	92090000	92140000	92420000	6216	0.604396	UI_44
chr1	92030000	92040000	chr1	92220000	92230000	75	3.72287302164784e-32	4.26349366106471e-29	91960000	92090000	92140000	92420000	6216	0.604396	UI_45
chr1	92040000	92050000	chr1	92310000	92320000	57	6.39018456834654e-32	7.21386141758623e-29	91960000	92090000	92140000	92420000	6216	0.604396	UI_46
chr1	92030000	92040000	chr1	92160000	92170000	83	1.39784130796594e-27	1.12865417615889e-24	91960000	92090000	92140000	92420000	6216	0.604396	UI_47
chr1	92040000	92050000	chr1	92190000	92200000	69	2.09491411083154e-24	1.28597065606213e-21	91960000	92090000	92140000	92420000	6216	0.604396	UI_48
chr1	92040000	92050000	chr1	92390000	92400000	38	2.44113540043515e-22	1.23607437661882e-19	91960000	92090000	92140000	92420000	6216	0.604396	UI_49
chr1	92000000	92010000	chr1	92190000	92200000	39	6.46149273704938e-18	2.06418280711771e-15	91960000	92090000	92140000	92420000	6216	0.604396	UI_50
chr1	92070000	92080000	chr1	92350000	92360000	37	2.94340488514906e-17	8.73019815089422e-15	91960000	92090000	92140000	92420000	6216	0.604396	UI_51
chr1	91990000	92000000	chr1	92160000	92170000	43	1.08295079719169e-16	3.00879206221646e-14	91960000	92090000	92140000	92420000	6216	0.604396	UI_52
chr1	91980000	91990000	chr1	92220000	92230000	47	2.87630926292199e-16	7.59458408436872e-14	91960000	92090000	92140000	92420000	6216	0.604396	UI_53
chr1	92000000	92010000	chr1	92390000	92400000	25	4.8009353032599e-16	1.23370564222097e-13	91960000	92090000	92140000	92420000	6216	0.604396	UI_54
chr1	91980000	91990000	chr1	92290000	92300000	37	3.98704095716391e-15	9.15203760391317e-13	91960000	92090000	92140000	92420000	6216	0.604396	UI_55
chr1	92010000	92020000	chr1	92320000	92330000	27	1.80257306088602e-13	3.32387871394329e-11	91960000	92090000	92140000	92420000	6216	0.604396	UI_56
chr1	92070000	92080000	chr1	92390000	92400000	26	6.98343848835644e-13	1.18567262686953e-10	91960000	92090000	92140000	92420000	6216	0.604396	UI_57
chr1	92070000	92080000	chr1	92160000	92170000	58	2.9875464732249e-11	3.96933133607465e-09	91960000	92090000	92140000	92420000	6216	0.604396	UI_58
chr1	92030000	92040000	chr1	92270000	92280000	27	2.14291042114569e-10	2.47735945594084e-08	91960000	92090000	92140000	92420000	6216	0.604396	UI_59
chr1	92070000	92080000	chr1	92310000	92320000	28	5.0867973552747e-10	5.51213007667838e-08	91960000	92090000	92140000	92420000	6216	0.604396	UI_60
chr1	92070000	92080000	chr1	92220000	92230000	41	1.48032601467743e-09	1.47812468775846e-07	91960000	92090000	92140000	92420000	6216	0.604396	UI_61
chr1	91960000	91970000	chr1	92260000	92270000	19	1.57402233639287e-08	1.29744199424772e-06	91960000	92090000	92140000	92420000	6216	0.604396	UI_62
chr1	91990000	92000000	chr1	92250000	92260000	18	1.10916687287409e-07	7.69502694072465e-06	91960000	92090000	92140000	92420000	6216	0.604396	UI_63
chr1	91980000	91990000	chr1	92320000	92330000	21	2.82469419188194e-07	1.79619662228752e-05	91960000	92090000	92140000	92420000	6216	0.604396	UI_64
chr1	91970000	91980000	chr1	92190000	92200000	23	8.10589353013807e-05	0.00273542	91960000	92090000	92140000	92420000	6216	0.604396	UI_65
chr1	12370000	12380000	chr1	12670000	12680000	111	9.58979073572139e-90	1.76835278211288e-85	12280000	12560000	12500000	12730000	9781	0.403727	UI_66
chr1	12460000	12470000	chr1	12670000	12680000	102	8.05635841607178e-54	3.40704384948735e-50	12280000	12560000	12500000	12730000	9781	0.403727	UI_67
chr1	12460000	12470000	chr1	12570000	12580000	118	1.74449581184323e-37	2.88105045721788e-34	12280000	12560000	12500000	12730000	9781	0.403727	UI_68
chr1	12460000	12470000	chr1	12610000	12620000	93	2.45845286983509e-30	2.47306022354965e-27	12280000	12560000	12500000	12730000	9781	0.403727	UI_69
chr1	12370000	12380000	chr1	12710000	12720000	42	4.22440790634833e-30	4.17374310915061e-27	12280000	12560000	12500000	12730000	9781	0.403727	UI_70
chr1	12500000	12510000	chr1	12670000	12680000	83	5.00791877033747e-30	4.91742128266505e-27	12280000	12560000	12500000	12730000	9781	0.403727	UI_71
chr1	12540000	12550000	chr1	12670000	12680000	104	2.02108406599925e-29	1.89247432256359e-26	12280000	12560000	12500000	12730000	9781	0.403727	UI_72
chr1	12370000	12380000	chr1	12570000	12580000	60	1.95831971360791e-24	1.20537328315074e-21	12280000	12560000	12500000	12730000	9781	0.403727	UI_73
chr1	12370000	12380000	chr1	12600000	12610000	52	1.02582350697588e-23	5.89731178711582e-21	12280000	12560000	12500000	12730000	9781	0.403727	UI_74
chr1	12390000	12400000	chr1	12540000	12550000	53	7.88308517537185e-19	2.79147607327921e-16	12280000	12560000	12500000	12730000	9781	0.403727	UI_75
chr1	12540000	12550000	chr1	12580000	12590000	152	8.38030672685148e-17	2.3602681270457e-14	12280000	12560000	12500000	12730000	9781	0.403727	UI_76
chr1	12370000	12380000	chr1	12630000	12640000	34	2.7836163051473e-16	7.36310814571139e-14	12280000	12560000	12500000	12730000	9781	0.403727	UI_77
chr1	12330000	12340000	chr1	12670000	12680000	38	2.94022211420076e-16	7.75568027168666e-14	12280000	12560000	12500000	12730000	9781	0.403727	UI_78
chr1	12540000	12550000	chr1	12610000	12620000	125	3.48266640649091e-16	9.10991665713851e-14	12280000	12560000	12500000	12730000	9781	0.403727	UI_79
chr1	12430000	12440000	chr1	12670000	12680000	37	6.72809465991949e-16	1.69788654397302e-13	12280000	12560000	12500000	12730000	9781	0.403727	UI_80
chr1	12430000	12440000	chr1	12610000	12620000	41	8.79532848874639e-14	1.69320237208659e-11	12280000	12560000	12500000	12730000	9781	0.403727	UI_81
chr1	12510000	12520000	chr1	12610000	12620000	82	1.17152640507489e-13	2.21721017232355e-11	12280000	12560000	12500000	12730000	9781	0.403727	UI_82
chr1	12490000	12500000	chr1	12580000	12590000	64	2.32627998913778e-12	3.65682857915351e-10	12280000	12560000	12500000	12730000	9781	0.403727	UI_83
chr1	12330000	12340000	chr1	12710000	12720000	23	1.53156783683775e-11	2.13166865487392e-09	12280000	12560000	12500000	12730000	9781	0.403727	UI_84
chr1	12370000	12380000	chr1	12510000	12520000	39	1.45142969725751e-09	1.45162948821053e-07	12280000	12560000	12500000	12730000	9781	0.403727	UI_85
chr1	12460000	12470000	chr1	12710000	12720000	25	2.4871402729909e-09	2.38418867148558e-07	12280000	12560000	12500000	12730000	9781	0.403727	UI_86
chr1	12400000	12410000	chr1	12610000	12620000	36	5.35826285294083e-09	4.82829724523451e-07	12280000	12560000	12500000	12730000	9781	0.403727	UI_87
chr1	12400000	12410000	chr1	12670000	12680000	29	8.74675317319671e-09	7.57271576249946e-07	12280000	12560000	12500000	12730000	9781	0.403727	UI_88
chr1	12300000	12310000	chr1	12670000	12680000	23	2.42649552458629e-08	1.9267790476413e-06	12280000	12560000	12500000	12730000	9781	0.403727	UI_89
chr1	12360000	12370000	chr1	12540000	12550000	24	9.3520042545652e-07	5.29221596360295e-05	12280000	12560000	12500000	12730000	9781	0.403727	UI_90
chr1	12460000	12470000	chr1	12640000	12650000	25	3.73559858730118e-06	0.000182923	12280000	12560000	12500000	12730000	9781	0.403727	UI_91
chr1	12540000	12550000	chr1	12640000	12650000	37	3.4993599481888e-05	0.00131739	12280000	12560000	12500000	12730000	9781	0.403727	UI_92
chr1	12500000	12510000	chr1	12640000	12650000	27	3.57677340845798e-05	0.0013427	12280000	12560000	12500000	12730000	9781	0.403727	UI_93
chr1	201520000	201530000	chr1	201670000	201680000	186	4.96715969858864e-106	1.55790695976169e-101	201400000	201580000	201550000	201870000	9886	0.362847	UI_94
chr1	201520000	201530000	chr1	201750000	201760000	83	8.12142332240124e-45	2.07204244556042e-41	201400000	201580000	201550000	201870000	9886	0.362847	UI_95
chr1	201530000	201540000	chr1	201600000	201610000	206	3.71519196746617e-43	8.66811018871491e-40	201400000	201580000	201550000	201870000	9886	0.362847	UI_96
chr1	201520000	201530000	chr1	201710000	201720000	86	1.67373778417375e-33	2.12020768502157e-30	201400000	201580000	201550000	201870000	9886	0.362847	UI_97
chr1	201530000	201540000	chr1	201570000	201580000	210	9.3988872226177e-33	1.12378664566237e-29	201400000	201580000	201550000	201870000	9886	0.362847	UI_98
chr1	201500000	201510000	chr1	201790000	201800000	53	6.15380949833305e-25	3.96386720307791e-22	201400000	201580000	201550000	201870000	9886	0.362847	UI_99
chr1	201500000	201510000	chr1	201600000	201610000	128	1.1597289425997e-22	6.05965143117978e-20	201400000	201580000	201550000	201870000	9886	0.362847	UI_100
chr1	201530000	201540000	chr1	201640000	201650000	69	1.10522790200149e-17	3.44082276040785e-15	201400000	201580000	201550000	201870000	9886	0.362847	UI_101
chr1	201530000	201540000	chr1	201780000	201790000	42	1.33252164052903e-16	3.6623189955235e-14	201400000	201580000	201550000	201870000	9886	0.362847	UI_102
chr1	201530000	201540000	chr1	201810000	201820000	39	3.25425063598482e-14	6.64289236992157e-12	201400000	201580000	201550000	201870000	9886	0.362847	UI_103
chr1	201500000	201510000	chr1	201820000	201830000	32	7.41253099366216e-14	1.4413449072332e-11	201400000	201580000	201550000	201870000	9886	0.362847	UI_104
chr1	201480000	201490000	chr1	201680000	201690000	48	8.99932074269575e-13	1.50337826413262e-10	201400000	201580000	201550000	201870000	9886	0.362847	UI_105
chr1	201500000	201510000	chr1	201860000	201870000	30	1.07552162287538e-12	1.7775785795879e-10	201400000	201580000	201550000	201870000	9886	0.362847	UI_106
chr1	201450000	201460000	chr1	201710000	201720000	37	2.71394965869263e-11	3.62922247078095e-09	201400000	201580000	201550000	201870000	9886	0.362847	UI_107
chr1	201450000	201460000	chr1	201680000	201690000	46	3.6375852248729e-11	4.77035125310212e-09	201400000	201580000	201550000	201870000	9886	0.362847	UI_108
chr1	201570000	201580000	chr1	201660000	201670000	59	6.30535871712288e-11	7.96288727005025e-09	201400000	201580000	201550000	201870000	9886	0.362847	UI_109
chr1	201500000	201510000	chr1	201640000	201650000	47	2.17356145202654e-10	2.51013525196722e-08	201400000	201580000	201550000	201870000	9886	0.362847	UI_110
chr1	201420000	201430000	chr1	201680000	201690000	41	5.61613345124246e-10	6.03964859791575e-08	201400000	201580000	201550000	201870000	9886	0.362847	UI_111
chr1	201550000	201560000	chr1	201700000	201710000	49	9.57616902399696e-09	8.22905148744333e-07	201400000	201580000	201550000	201870000	9886	0.362847	UI_112
chr1	201530000	201540000	chr1	201850000	201860000	24	1.45403186460751e-08	1.20650463834298e-06	201400000	201580000	201550000	201870000	9886	0.362847	UI_113
chr1	201480000	201490000	chr1	201710000	201720000	29	1.61361148735679e-07	1.080919484555e-05	201400000	201580000	201550000	201870000	9886	0.362847	UI_114
chr1	201470000	201480000	chr1	201650000	201660000	26	5.04774141049652e-05	0.00181388	201400000	201580000	201550000	201870000	9886	0.362847	UI_115
chr1	203480000	203490000	chr1	203660000	203670000	135	6.72303344718178e-72	6.35194338156909e-68	203390000	203580000	203520000	203720000	9305	0.328947	UI_116
chr1	203480000	203490000	chr1	203590000	203600000	167	1.01801626891534e-70	9.18031964152428e-67	203390000	203580000	203520000	203720000	9305	0.328947	UI_117
chr1	203520000	203530000	chr1	203590000	203600000	199	8.571059131289e-53	3.41920744615093e-49	203390000	203580000	203520000	203720000	9305	0.328947	UI_118
chr1	203480000	203490000	chr1	203520000	203530000	288	5.78229269403435e-45	1.48660132012117e-41	203390000	203580000	203520000	203720000	9305	0.328947	UI_119
chr1	203480000	203490000	chr1	203630000	203640000	113	6.69119049774804e-42	1.45542878296077e-38	203390000	203580000	203520000	203720000	9305	0.328947	UI_120
chr1	203520000	203530000	chr1	203660000	203670000	119	4.58009520470852e-38	7.86653380291197e-35	203390000	203580000	203520000	203720000	9305	0.328947	UI_121
chr1	203520000	203530000	chr1	203550000	203560000	222	2.68043544794626e-32	3.0962002538808e-29	203390000	203580000	203520000	203720000	9305	0.328947	UI_122
chr1	203520000	203530000	chr1	203630000	203640000	129	4.82328428170119e-31	5.10498317641669e-28	203390000	203580000	203520000	203720000	9305	0.328947	UI_123
chr1	203480000	203490000	chr1	203550000	203560000	116	4.42752046462218e-26	3.15392919293021e-23	203390000	203580000	203520000	203720000	9305	0.328947	UI_124
chr1	203450000	203460000	chr1	203640000	203650000	54	8.81004557624789e-16	2.19265475451587e-13	203390000	203580000	203520000	203720000	9305	0.328947	UI_125
chr1	203420000	203430000	chr1	203660000	203670000	37	2.48885284422836e-14	5.15976453346867e-12	203390000	203580000	203520000	203720000	9305	0.328947	UI_126
chr1	203570000	203580000	chr1	203660000	203670000	55	2.20316842555941e-10	2.54188703234058e-08	203390000	203580000	203520000	203720000	9305	0.328947	UI_127
chr1	203450000	203460000	chr1	203610000	203620000	48	1.42761948003657e-09	1.42968771496781e-07	203390000	203580000	203520000	203720000	9305	0.328947	UI_128
chr1	203480000	203490000	chr1	203690000	203700000	41	1.13433593209929e-08	9.6057627027728e-07	203390000	203580000	203520000	203720000	9305	0.328947	UI_129
chr1	203550000	203560000	chr1	203570000	203580000	104	2.92470933381025e-08	2.28498260528916e-06	203390000	203580000	203520000	203720000	9305	0.328947	UI_130
chr1	203410000	203420000	chr1	203630000	203640000	26	1.71958777404676e-05	0.000707262	203390000	203580000	203520000	203720000	9305	0.328947	UI_131
chr1	203390000	203400000	chr1	203660000	203670000	18	0.000283726	0.00801453	203390000	203580000	203520000	203720000	9305	0.328947	UI_132
chr1	59250000	59260000	chr1	60160000	60170000	36	3.28111351038956e-34	4.35223531503661e-31	59150000	59330000	60100000	60250000	1732	0.459259	UI_133
chr1	59250000	59260000	chr1	60220000	60230000	32	8.47554626078993e-30	8.17158794312676e-27	59150000	59330000	60100000	60250000	1732	0.459259	UI_134
chr1	59220000	59230000	chr1	60160000	60170000	32	4.48284838024444e-29	4.08353926212722e-26	59150000	59330000	60100000	60250000	1732	0.459259	UI_135
chr1	59220000	59230000	chr1	60190000	60200000	32	7.65642304877926e-29	6.84614676126232e-26	59150000	59330000	60100000	60250000	1732	0.459259	UI_136
chr1	59200000	59210000	chr1	60220000	60230000	28	3.23847184840241e-26	2.33427776222009e-23	59150000	59330000	60100000	60250000	1732	0.459259	UI_137
chr1	59280000	59290000	chr1	60170000	60180000	26	6.02059171627397e-21	2.65465303212918e-18	59150000	59330000	60100000	60250000	1732	0.459259	UI_138
chr1	59250000	59260000	chr1	60190000	60200000	25	2.47936344403658e-20	1.0254144812252e-17	59150000	59330000	60100000	60250000	1732	0.459259	UI_139
chr1	59280000	59290000	chr1	60220000	60230000	18	6.49553760242771e-13	1.10805939598111e-10	59150000	59330000	60100000	60250000	1732	0.459259	UI_140
chr1	59220000	59230000	chr1	60130000	60140000	15	1.02631790921705e-09	1.05467606035558e-07	59150000	59330000	60100000	60250000	1732	0.459259	UI_141
chr1	59280000	59290000	chr1	60130000	60140000	15	1.84023186388912e-09	1.80746759261941e-07	59150000	59330000	60100000	60250000	1732	0.459259	UI_142
chr1	59180000	59190000	chr1	60190000	60200000	13	9.04598308312592e-09	7.81041123290536e-07	59150000	59330000	60100000	60250000	1732	0.459259	UI_143
chr1	59310000	59320000	chr1	60220000	60230000	13	2.17596575289165e-08	1.74447386124205e-06	59150000	59330000	60100000	60250000	1732	0.459259	UI_144
chr1	59190000	59200000	chr1	60150000	60160000	12	4.45023448838889e-08	3.35127092375689e-06	59150000	59330000	60100000	60250000	1732	0.459259	UI_145
chr1	59160000	59170000	chr1	60220000	60230000	12	8.37247005761809e-08	5.95747419155964e-06	59150000	59330000	60100000	60250000	1732	0.459259	UI_146
chr1	59310000	59320000	chr1	60170000	60180000	12	3.75680013791348e-07	2.32527698397572e-05	59150000	59330000	60100000	60250000	1732	0.459259	UI_147
chr1	59250000	59260000	chr1	60120000	60130000	12	1.35900904418555e-06	7.39769107845154e-05	59150000	59330000	60100000	60250000	1732	0.459259	UI_148
chr1	9340000	9350000	chr1	9550000	9560000	51	3.7162543399022e-35	5.2560141974346e-32	9290000	9390000	9400000	9570000	3913	0.617647	UI_149
chr1	9340000	9350000	chr1	9510000	9520000	56	7.48268078995391e-24	4.36336939477961e-21	9290000	9390000	9400000	9570000	3913	0.617647	UI_150
chr1	9380000	9390000	chr1	9400000	9410000	126	8.11044401836476e-17	2.28793800999083e-14	9290000	9390000	9400000	9570000	3913	0.617647	UI_151
chr1	9370000	9380000	chr1	9530000	9540000	39	8.46128589654646e-16	2.10953676173105e-13	9290000	9390000	9400000	9570000	3913	0.617647	UI_152
chr1	9350000	9360000	chr1	9470000	9480000	48	1.65178022902755e-15	3.97956245621937e-13	9290000	9390000	9400000	9570000	3913	0.617647	UI_153
chr1	9360000	9370000	chr1	9440000	9450000	55	1.43969417130785e-13	2.69135439934541e-11	9290000	9390000	9400000	9570000	3913	0.617647	UI_154
chr1	9370000	9380000	chr1	9500000	9510000	42	2.66445804786491e-13	4.79760886034874e-11	9290000	9390000	9400000	9570000	3913	0.617647	UI_155
chr1	9290000	9300000	chr1	9550000	9560000	26	2.59093940169773e-11	3.47572216626123e-09	9290000	9390000	9400000	9570000	3913	0.617647	UI_156
chr1	9290000	9300000	chr1	9520000	9530000	24	2.94564298377677e-08	2.29980862001123e-06	9290000	9390000	9400000	9570000	3913	0.617647	UI_157
chr1	9380000	9390000	chr1	9470000	9480000	36	6.76120427819118e-07	3.95064673006247e-05	9290000	9390000	9400000	9570000	3913	0.617647	UI_158
chr1	9350000	9360000	chr1	9400000	9410000	54	1.71876501888996e-06	9.1299815759312e-05	9290000	9390000	9400000	9570000	3913	0.617647	UI_159
chr1	9330000	9340000	chr1	9440000	9450000	23	1.20368699153444e-05	0.000516522	9290000	9390000	9400000	9570000	3913	0.617647	UI_160
chr1	25010000	25020000	chr1	25160000	25170000	49	3.09515025005563e-26	2.23519002634625e-23	24960000	25110000	25030000	25180000	5722	0.457778	UI_161
chr1	25010000	25020000	chr1	25070000	25080000	96	9.80618150140543e-26	6.76157551548896e-23	24960000	25110000	25030000	25180000	5722	0.457778	UI_162
chr1	25010000	25020000	chr1	25100000	25110000	57	4.69268376237687e-17	1.36083782924074e-14	24960000	25110000	25030000	25180000	5722	0.457778	UI_163
chr1	25090000	25100000	chr1	25120000	25130000	119	1.14692973531285e-16	3.1772199521046e-14	24960000	25110000	25030000	25180000	5722	0.457778	UI_164
chr1	25020000	25030000	chr1	25040000	25050000	123	3.53174398469829e-14	7.17605664766488e-12	24960000	25110000	25030000	25180000	5722	0.457778	UI_165
chr1	25060000	25070000	chr1	25160000	25170000	41	4.76728977820362e-12	7.16421252957462e-10	24960000	25110000	25030000	25180000	5722	0.457778	UI_166
chr1	24980000	24990000	chr1	25160000	25170000	33	1.02885315848133e-11	1.46928396794065e-09	24960000	25110000	25030000	25180000	5722	0.457778	UI_167
chr1	25050000	25060000	chr1	25100000	25110000	77	8.85291688634431e-11	1.09159050486121e-08	24960000	25110000	25030000	25180000	5722	0.457778	UI_168
chr1	25090000	25100000	chr1	25160000	25170000	47	4.200621863573e-10	4.6168775075146e-08	24960000	25110000	25030000	25180000	5722	0.457778	UI_169
chr1	25040000	25050000	chr1	25070000	25080000	106	1.73477240257348e-09	1.71157915760709e-07	24960000	25110000	25030000	25180000	5722	0.457778	UI_170
chr1	25010000	25020000	chr1	25130000	25140000	37	1.66993682153139e-05	0.000689322	24960000	25110000	25030000	25180000	5722	0.457778	UI_171
chr1	85780000	85790000	chr1	86040000	86050000	108	2.1601735769889e-65	1.57595006519451e-61	85720000	85840000	85900000	86100000	3296	0.445833	UI_172
chr1	85770000	85780000	chr1	85920000	85930000	70	4.46629244028597e-33	5.48550365768927e-30	85720000	85840000	85900000	86100000	3296	0.445833	UI_173
chr1	85780000	85790000	chr1	86070000	86080000	65	1.22102515556341e-30	1.25628418038263e-27	85720000	85840000	85900000	86100000	3296	0.445833	UI_174
chr1	85770000	85780000	chr1	85980000	85990000	46	3.74715302650635e-19	1.37219907309477e-16	85720000	85840000	85900000	86100000	3296	0.445833	UI_175
chr1	85770000	85780000	chr1	86010000	86020000	41	4.8312598497783e-19	1.74889677001432e-16	85720000	85840000	85900000	86100000	3296	0.445833	UI_176
chr1	85810000	85820000	chr1	86040000	86050000	38	8.17377309437029e-14	1.58007531567216e-11	85720000	85840000	85900000	86100000	3296	0.445833	UI_177
chr1	85740000	85750000	chr1	86040000	86050000	36	1.48564045062151e-13	2.77312601873651e-11	85720000	85840000	85900000	86100000	3296	0.445833	UI_178
chr1	85740000	85750000	chr1	86070000	86080000	30	1.1376956985092e-10	1.37765374582114e-08	85720000	85840000	85900000	86100000	3296	0.445833	UI_179
chr1	85830000	85840000	chr1	86070000	86080000	27	2.07651701063868e-07	1.3594198770701e-05	85720000	85840000	85900000	86100000	3296	0.445833	UI_180
chr1	85780000	85790000	chr1	85950000	85960000	42	7.44316134248991e-07	4.30793449727421e-05	85720000	85840000	85900000	86100000	3296	0.445833	UI_181
chr1	85740000	85750000	chr1	85960000	85970000	24	3.90013703242549e-06	0.000190102	85720000	85840000	85900000	86100000	3296	0.445833	UI_182
chr1	225660000	225670000	chr1	225950000	225960000	47	7.92131812356843e-33	9.52872115603212e-30	225630000	225790000	225920000	226140000	2061	0.306818	UI_183
chr1	225740000	225750000	chr1	225950000	225960000	45	1.66423398071029e-26	1.22838293112085e-23	225630000	225790000	225920000	226140000	2061	0.306818	UI_184
chr1	225690000	225700000	chr1	225960000	225970000	37	9.39768810490976e-21	4.06051350076209e-18	225630000	225790000	225920000	226140000	2061	0.306818	UI_185
chr1	225660000	225670000	chr1	226020000	226030000	25	2.14041072555023e-17	6.44937621084786e-15	225630000	225790000	225920000	226140000	2061	0.306818	UI_186
chr1	225690000	225700000	chr1	225930000	225940000	28	9.70868977547001e-13	1.61522115302388e-10	225630000	225790000	225920000	226140000	2061	0.306818	UI_187
chr1	225660000	225670000	chr1	226100000	226110000	19	1.69753913901461e-10	1.99475620423807e-08	225630000	225790000	225920000	226140000	2061	0.306818	UI_188
chr1	225660000	225670000	chr1	225990000	226000000	18	2.95668406017847e-10	3.33729917188373e-08	225630000	225790000	225920000	226140000	2061	0.306818	UI_189
chr1	225780000	225790000	chr1	225950000	225960000	37	5.74272483444127e-09	5.14413509996239e-07	225630000	225790000	225920000	226140000	2061	0.306818	UI_190
chr1	225660000	225670000	chr1	226060000	226070000	15	1.96600596428795e-08	1.59001020402482e-06	225630000	225790000	225920000	226140000	2061	0.306818	UI_191
chr1	225660000	225670000	chr1	225920000	225930000	19	1.71667224393501e-07	1.14384624928422e-05	225630000	225790000	225920000	226140000	2061	0.306818	UI_192
chr1	225650000	225660000	chr1	226130000	226140000	12	1.91533223321374e-06	0.000100584	225630000	225790000	225920000	226140000	2061	0.306818	UI_193
chr1	225630000	225640000	chr1	226050000	226060000	13	7.45116146666365e-06	0.000338052	225630000	225790000	225920000	226140000	2061	0.306818	UI_194
chr1	225740000	225750000	chr1	225920000	225930000	19	8.2736366599191e-06	0.000370846	225630000	225790000	225920000	226140000	2061	0.306818	UI_195
chr1	225630000	225640000	chr1	225950000	225960000	14	1.52222183079872e-05	0.000635368	225630000	225790000	225920000	226140000	2061	0.306818	UI_196
chr1	225630000	225640000	chr1	226090000	226100000	9	8.40092373790559e-05	0.00282132	225630000	225790000	225920000	226140000	2061	0.306818	UI_197
chr1	94140000	94150000	chr1	94280000	94290000	75	1.04764756140581e-40	2.11650375228858e-37	94030000	94190000	94200000	94350000	3482	0.470833	UI_198
chr1	94080000	94090000	chr1	94300000	94310000	90	4.08486226264866e-38	7.03855397057139e-35	94030000	94190000	94200000	94350000	3482	0.470833	UI_199
chr1	94080000	94090000	chr1	94270000	94280000	72	1.83407861704883e-36	2.82404063790087e-33	94030000	94190000	94200000	94350000	3482	0.470833	UI_200
chr1	94040000	94050000	chr1	94300000	94310000	45	2.76401901610799e-17	8.22299270891397e-15	94030000	94190000	94200000	94350000	3482	0.470833	UI_201
chr1	94140000	94150000	chr1	94210000	94220000	65	2.81897367961258e-16	7.45202638957175e-14	94030000	94190000	94200000	94350000	3482	0.470833	UI_202
chr1	94170000	94180000	chr1	94200000	94210000	78	2.50938651826781e-10	2.86721939525612e-08	94030000	94190000	94200000	94350000	3482	0.470833	UI_203
chr1	94140000	94150000	chr1	94240000	94250000	40	3.99035387746712e-09	3.68033399680735e-07	94030000	94190000	94200000	94350000	3482	0.470833	UI_204
chr1	94040000	94050000	chr1	94270000	94280000	23	9.31093312971942e-08	6.56499235137653e-06	94030000	94190000	94200000	94350000	3482	0.470833	UI_205
chr1	94110000	94120000	chr1	94270000	94280000	20	1.434285693645e-06	7.76336713970202e-05	94030000	94190000	94200000	94350000	3482	0.470833	UI_206
chr1	94170000	94180000	chr1	94270000	94280000	29	2.5377037206714e-06	0.000129459	94030000	94190000	94200000	94350000	3482	0.470833	UI_207
chr1	94130000	94140000	chr1	94310000	94320000	17	3.6802979403437e-05	0.0013766	94030000	94190000	94200000	94350000	3482	0.470833	UI_208
chr1	94180000	94190000	chr1	94240000	94250000	27	5.26934930208689e-05	0.0018831	94030000	94190000	94200000	94350000	3482	0.470833	UI_209
chr1	94100000	94110000	chr1	94340000	94350000	15	0.00014529	0.00452354	94030000	94190000	94200000	94350000	3482	0.470833	UI_210
chr1	19720000	19730000	chr1	19970000	19980000	141	5.09207814498884e-102	1.42567150780357e-97	19630000	19840000	19880000	20010000	3974	0.413919	UI_211
chr1	19770000	19780000	chr1	19970000	19980000	123	4.52018674039261e-73	4.52237368200359e-69	19630000	19840000	19880000	20010000	3974	0.413919	UI_212
chr1	19810000	19820000	chr1	19970000	19980000	99	8.59161462674499e-49	2.77107346775493e-45	19630000	19840000	19880000	20010000	3974	0.413919	UI_213
chr1	19660000	19670000	chr1	19970000	19980000	61	4.55131229725622e-46	1.24780999345989e-42	19630000	19840000	19880000	20010000	3974	0.413919	UI_214
chr1	19690000	19700000	chr1	19970000	19980000	67	2.43210667364734e-45	6.4005411409956e-42	19630000	19840000	19880000	20010000	3974	0.413919	UI_215
chr1	19720000	19730000	chr1	19920000	19930000	94	1.38640073368214e-43	3.30534870879552e-40	19630000	19840000	19880000	20010000	3974	0.413919	UI_216
chr1	19750000	19760000	chr1	19920000	19930000	67	2.99924228916449e-22	1.50718470856026e-19	19630000	19840000	19880000	20010000	3974	0.413919	UI_217
chr1	19720000	19730000	chr1	19890000	19900000	55	1.00522139087894e-20	4.33089577567252e-18	19630000	19840000	19880000	20010000	3974	0.413919	UI_218
chr1	19790000	19800000	chr1	19920000	19930000	53	2.1196219272915e-15	5.03581337880225e-13	19630000	19840000	19880000	20010000	3974	0.413919	UI_219
chr1	19690000	19700000	chr1	19920000	19930000	33	7.93388997848939e-12	1.15275530429317e-09	19630000	19840000	19880000	20010000	3974	0.413919	UI_220
chr1	19630000	19640000	chr1	19970000	19980000	21	1.08225764630067e-08	9.19759112155953e-07	19630000	19840000	19880000	20010000	3974	0.413919	UI_221
chr1	19720000	19730000	chr1	20000000	20010000	18	7.39637199459858e-06	0.00033584	19630000	19840000	19880000	20010000	3974	0.413919	UI_222
chr1	8060000	8070000	chr1	8370000	8380000	55	3.9323634125792e-42	8.67697608088334e-39	8010000	8160000	8340000	8470000	2017	0.476923	UI_223
chr1	8030000	8040000	chr1	8370000	8380000	49	7.80069158229626e-32	8.75535084390919e-29	8010000	8160000	8340000	8470000	2017	0.476923	UI_224
chr1	8070000	8080000	chr1	8400000	8410000	41	7.54626717277101e-22	3.64471754745031e-19	8010000	8160000	8340000	8470000	2017	0.476923	UI_225
chr1	8040000	8050000	chr1	8400000	8410000	30	2.55022507734534e-19	9.50981340989566e-17	8010000	8160000	8340000	8470000	2017	0.476923	UI_226
chr1	8030000	8040000	chr1	8430000	8440000	33	8.57817912377185e-17	2.41358258380378e-14	8010000	8160000	8340000	8470000	2017	0.476923	UI_227
chr1	8120000	8130000	chr1	8370000	8380000	34	1.95316650921641e-16	5.2647441304272e-14	8010000	8160000	8340000	8470000	2017	0.476923	UI_228
chr1	8090000	8100000	chr1	8370000	8380000	31	1.11760940016483e-14	2.42617264367217e-12	8010000	8160000	8340000	8470000	2017	0.476923	UI_229
chr1	8060000	8070000	chr1	8450000	8460000	29	5.63697999117222e-14	1.11515214779323e-11	8010000	8160000	8340000	8470000	2017	0.476923	UI_230
chr1	8100000	8110000	chr1	8400000	8410000	26	7.91544450918133e-14	1.53300328635079e-11	8010000	8160000	8340000	8470000	2017	0.476923	UI_231
chr1	8150000	8160000	chr1	8370000	8380000	34	1.94771917872486e-13	3.57371618187702e-11	8010000	8160000	8340000	8470000	2017	0.476923	UI_232
chr1	8040000	8050000	chr1	8340000	8350000	19	1.92617416801499e-07	1.26973965316913e-05	8010000	8160000	8340000	8470000	2017	0.476923	UI_233
chr1	8150000	8160000	chr1	8400000	8410000	22	1.17450418333485e-06	6.49127414837469e-05	8010000	8160000	8340000	8470000	2017	0.476923	UI_234
chr1	16120000	16130000	chr1	16310000	16320000	140	3.74139659135344e-84	5.73279084022046e-80	16110000	16180000	16210000	16410000	4638	0.614286	UI_235
chr1	16120000	16130000	chr1	16270000	16280000	182	8.1027867296415e-76	9.00838853979557e-72	16110000	16180000	16210000	16410000	4638	0.614286	UI_236
chr1	16120000	16130000	chr1	16340000	16350000	96	3.4678472277143e-50	1.20811799902696e-46	16110000	16180000	16210000	16410000	4638	0.614286	UI_237
chr1	16120000	16130000	chr1	16220000	16230000	123	6.93412354819875e-32	7.8105996858595e-29	16110000	16180000	16210000	16410000	4638	0.614286	UI_238
chr1	16120000	16130000	chr1	16370000	16380000	45	8.31566743787723e-22	3.9993476725828e-19	16110000	16180000	16210000	16410000	4638	0.614286	UI_239
chr1	16170000	16180000	chr1	16270000	16280000	91	1.14197905960912e-20	4.89295762506331e-18	16110000	16180000	16210000	16410000	4638	0.614286	UI_240
chr1	16170000	16180000	chr1	16220000	16230000	88	1.57048149802046e-13	2.92129497958963e-11	16110000	16180000	16210000	16410000	4638	0.614286	UI_241
chr1	16120000	16130000	chr1	16400000	16410000	33	3.74451169862282e-10	4.1523097081104e-08	16110000	16180000	16210000	16410000	4638	0.614286	UI_242
chr1	16160000	16170000	chr1	16330000	16340000	32	2.79038133644497e-09	2.65012683718154e-07	16110000	16180000	16210000	16410000	4638	0.614286	UI_243
chr1	16160000	16170000	chr1	16300000	16310000	33	3.98530431036229e-08	3.02966976846944e-06	16110000	16180000	16210000	16410000	4638	0.614286	UI_244
chr1	115680000	115690000	chr1	116080000	116090000	66	9.4760312118987e-56	4.40642537776631e-52	115630000	115810000	115940000	116160000	2330	0.328283	UI_245
chr1	115680000	115690000	chr1	116030000	116040000	59	2.63284645284577e-45	6.91861072795464e-42	115630000	115810000	115940000	116160000	2330	0.328283	UI_246
chr1	115670000	115680000	chr1	115970000	115980000	67	1.89497468417422e-44	4.74861297630949e-41	115630000	115810000	115940000	116160000	2330	0.328283	UI_247
chr1	115670000	115680000	chr1	116130000	116140000	44	3.21818170434983e-38	5.59476704409534e-35	115630000	115810000	115940000	116160000	2330	0.328283	UI_248
chr1	115710000	115720000	chr1	115970000	115980000	64	7.44878132189767e-36	1.10294887758664e-32	115630000	115810000	115940000	116160000	2330	0.328283	UI_249
chr1	115680000	115690000	chr1	116000000	116010000	40	6.80746030236572e-29	6.10591737814269e-26	115630000	115810000	115940000	116160000	2330	0.328283	UI_250
chr1	115640000	115650000	chr1	116080000	116090000	31	2.0953410048205e-19	7.88086666380927e-17	115630000	115810000	115940000	116160000	2330	0.328283	UI_251
chr1	115720000	115730000	chr1	116010000	116020000	30	2.11560345906705e-16	5.6766960732876e-14	115630000	115810000	115940000	116160000	2330	0.328283	UI_252
chr1	115770000	115780000	chr1	115970000	115980000	31	3.11653687202867e-11	4.12906756155944e-09	115630000	115810000	115940000	116160000	2330	0.328283	UI_253
chr1	115640000	115650000	chr1	116030000	116040000	22	8.97079894797901e-11	1.10499191189541e-08	115630000	115810000	115940000	116160000	2330	0.328283	UI_254
chr1	115740000	115750000	chr1	115970000	115980000	29	6.04964030882558e-07	3.57329134102218e-05	115630000	115810000	115940000	116160000	2330	0.328283	UI_255
chr1	115640000	115650000	chr1	116130000	116140000	12	3.36745658338698e-06	0.00016672	115630000	115810000	115940000	116160000	2330	0.328283	UI_256
chr1	115720000	115730000	chr1	115940000	115950000	23	7.79817913136096e-05	0.00264532	115630000	115810000	115940000	116160000	2330	0.328283	UI_257
chr1	115800000	115810000	chr1	115970000	115980000	18	0.000127309	0.004039	115630000	115810000	115940000	116160000	2330	0.328283	UI_258
chr1	94520000	94530000	chr1	94620000	94630000	108	6.93933986226012e-40	1.33701014940242e-36	94480000	94600000	94580000	94740000	4387	0.463542	UI_259
chr1	94560000	94570000	chr1	94620000	94630000	143	3.55025958500789e-37	5.75138396036171e-34	94480000	94600000	94580000	94740000	4387	0.463542	UI_260
chr1	94560000	94570000	chr1	94580000	94590000	266	1.5522909076663e-29	1.46530686764069e-26	94480000	94600000	94580000	94740000	4387	0.463542	UI_261
chr1	94520000	94530000	chr1	94580000	94590000	128	2.18178695720208e-26	1.5930220354064e-23	94480000	94600000	94580000	94740000	4387	0.463542	UI_262
chr1	94500000	94510000	chr1	94670000	94680000	46	6.8750145202145e-20	2.71526819779142e-17	94480000	94600000	94580000	94740000	4387	0.463542	UI_263
chr1	94500000	94510000	chr1	94720000	94730000	42	5.45599221555769e-18	1.75766665188863e-15	94480000	94600000	94580000	94740000	4387	0.463542	UI_264
chr1	94530000	94540000	chr1	94670000	94680000	42	6.06034317247953e-14	1.19340868700645e-11	94480000	94600000	94580000	94740000	4387	0.463542	UI_265
chr1	94590000	94600000	chr1	94620000	94630000	81	1.46053567762759e-09	1.4600131119136e-07	94480000	94600000	94580000	94740000	4387	0.463542	UI_266
chr1	94490000	94500000	chr1	94580000	94590000	53	3.77949208889552e-09	3.5024363119413e-07	94480000	94600000	94580000	94740000	4387	0.463542	UI_267
chr1	94490000	94500000	chr1	94640000	94650000	30	1.19397521070336e-08	1.00707117032439e-06	94480000	94600000	94580000	94740000	4387	0.463542	UI_268
chr1	94530000	94540000	chr1	94720000	94730000	28	3.62414847505015e-07	2.25106663574323e-05	94480000	94600000	94580000	94740000	4387	0.463542	UI_269
chr1	95000000	95010000	chr1	95250000	95260000	87	9.61456807963269e-60	5.37529844837331e-56	94930000	95030000	95040000	95290000	3234	0.324	UI_270
chr1	95000000	95010000	chr1	95110000	95120000	116	2.81078221187202e-43	6.59828779861977e-40	94930000	95030000	95040000	95290000	3234	0.324	UI_271
chr1	95000000	95010000	chr1	95160000	95170000	89	2.221362987192e-39	4.15856104016318e-36	94930000	95030000	95040000	95290000	3234	0.324	UI_272
chr1	95000000	95010000	chr1	95190000	95200000	67	4.34523873115544e-34	5.71132796003063e-31	94930000	95030000	95040000	95290000	3234	0.324	UI_273
chr1	95000000	95010000	chr1	95220000	95230000	45	1.76714370792357e-22	9.06905273750499e-20	94930000	95030000	95040000	95290000	3234	0.324	UI_274
chr1	95000000	95010000	chr1	95060000	95070000	75	2.94194317517884e-18	9.76342454239112e-16	94930000	95030000	95040000	95290000	3234	0.324	UI_275
chr1	94970000	94980000	chr1	95260000	95270000	21	4.3216372686345e-09	3.96077448324331e-07	94930000	95030000	95040000	95290000	3234	0.324	UI_276
chr1	95000000	95010000	chr1	95280000	95290000	15	7.64080727210444e-06	0.000345659	94930000	95030000	95040000	95290000	3234	0.324	UI_277
chr1	94940000	94950000	chr1	95260000	95270000	15	2.09890757964126e-05	0.00084236	94930000	95030000	95040000	95290000	3234	0.324	UI_278
chr1	234740000	234750000	chr1	235240000	235250000	169	1.3198268082063e-187	3.13683882755054e-182	234610000	234800000	235240000	235310000	2472	0.616541	UI_279
chr1	234630000	234640000	chr1	235240000	235250000	106	1.39212046757946e-118	6.64686064530482e-114	234610000	234800000	235240000	235310000	2472	0.616541	UI_280
chr1	234660000	234670000	chr1	235240000	235250000	47	1.59490358870884e-36	2.46677775916968e-33	234610000	234800000	235240000	235310000	2472	0.616541	UI_281
chr1	234790000	234800000	chr1	235240000	235250000	45	2.4585751821948e-29	2.28611410611239e-26	234610000	234800000	235240000	235310000	2472	0.616541	UI_282
chr1	234740000	234750000	chr1	235290000	235300000	33	1.53255399873129e-20	6.47197686792975e-18	234610000	234800000	235240000	235310000	2472	0.616541	UI_283
chr1	234630000	234640000	chr1	235270000	235280000	28	3.48365418298872e-20	1.41785069927635e-17	234610000	234800000	235240000	235310000	2472	0.616541	UI_284
chr1	234710000	234720000	chr1	235240000	235250000	27	3.72269894104323e-15	8.58042874847532e-13	234610000	234800000	235240000	235310000	2472	0.616541	UI_285
chr1	234660000	234670000	chr1	235270000	235280000	23	1.18196618182756e-14	2.55850788577568e-12	234610000	234800000	235240000	235310000	2472	0.616541	UI_286
chr1	234790000	234800000	chr1	235270000	235280000	24	1.01503370064296e-13	1.93752632771248e-11	234610000	234800000	235240000	235310000	2472	0.616541	UI_287
chr1	234690000	234700000	chr1	235270000	235280000	10	5.29858029319933e-05	0.00189204	234610000	234800000	235240000	235310000	2472	0.616541	UI_288
chr1	234610000	234620000	chr1	235300000	235310000	9	0.000277247	0.00785887	234610000	234800000	235240000	235310000	2472	0.616541	UI_289
chr1	164530000	164540000	chr1	164750000	164760000	79	1.09946236602046e-45	2.95302338325358e-42	164510000	164650000	164660000	164770000	2965	0.597403	UI_290
chr1	164590000	164600000	chr1	164750000	164760000	67	2.90352857406764e-29	2.68398768423234e-26	164510000	164650000	164660000	164770000	2965	0.597403	UI_291
chr1	164530000	164540000	chr1	164720000	164730000	47	7.39548795600696e-19	2.62533243870894e-16	164510000	164650000	164660000	164770000	2965	0.597403	UI_292
chr1	164640000	164650000	chr1	164750000	164760000	56	5.93383317364544e-16	1.50830322301179e-13	164510000	164650000	164660000	164770000	2965	0.597403	UI_293
chr1	164530000	164540000	chr1	164690000	164700000	43	1.86782582045582e-13	3.43620448875328e-11	164510000	164650000	164660000	164770000	2965	0.597403	UI_294
chr1	164620000	164630000	chr1	164710000	164720000	44	2.87570562952023e-09	2.72407478225828e-07	164510000	164650000	164660000	164770000	2965	0.597403	UI_295
chr1	164580000	164590000	chr1	164720000	164730000	59	4.72284037573031e-09	4.29845632723578e-07	164510000	164650000	164660000	164770000	2965	0.597403	UI_296
chr1	164560000	164570000	chr1	164750000	164760000	43	2.86241564394725e-08	2.24042238572543e-06	164510000	164650000	164660000	164770000	2965	0.597403	UI_297
chr1	164540000	164550000	chr1	164660000	164670000	30	1.2514950740197e-07	8.58637406424785e-06	164510000	164650000	164660000	164770000	2965	0.597403	UI_298
chr1	210610000	210620000	chr1	211300000	211310000	80	2.47971004342938e-90	4.71064394753192e-86	210520000	210810000	211260000	211370000	1518	0.260188	UI_299
chr1	210770000	210780000	chr1	211300000	211310000	64	9.83658118945621e-62	6.03233530465589e-58	210520000	210810000	211260000	211370000	1518	0.260188	UI_300
chr1	210580000	210590000	chr1	211300000	211310000	50	3.44660005986196e-53	1.40587263369313e-49	210520000	210810000	211260000	211370000	1518	0.260188	UI_301
chr1	210690000	210700000	chr1	211300000	211310000	27	5.52340055432878e-21	2.4457116400365e-18	210520000	210810000	211260000	211370000	1518	0.260188	UI_302
chr1	210740000	210750000	chr1	211300000	211310000	28	1.20881957112589e-18	4.19172364236864e-16	210520000	210810000	211260000	211370000	1518	0.260188	UI_303
chr1	210640000	210650000	chr1	211300000	211310000	26	2.27144248317745e-18	7.62698356325818e-16	210520000	210810000	211260000	211370000	1518	0.260188	UI_304
chr1	210550000	210560000	chr1	211300000	211310000	20	9.12095206545501e-15	2.00197326212975e-12	210520000	210810000	211260000	211370000	1518	0.260188	UI_305
chr1	210610000	210620000	chr1	211360000	211370000	17	3.32107954414821e-10	3.71663582859994e-08	210520000	210810000	211260000	211370000	1518	0.260188	UI_306
chr1	210610000	210620000	chr1	211330000	211340000	14	1.39009842933805e-07	9.4444392345907e-06	210520000	210810000	211260000	211370000	1518	0.260188	UI_307
chr1	210610000	210620000	chr1	211270000	211280000	13	1.61889087908328e-07	1.08414366494642e-05	210520000	210810000	211260000	211370000	1518	0.260188	UI_308
chr1	210760000	210770000	chr1	211270000	211280000	11	1.20030322917829e-06	6.61932333786252e-05	210520000	210810000	211260000	211370000	1518	0.260188	UI_309
chr1	210800000	210810000	chr1	211300000	211310000	13	5.89781034849343e-06	0.000274662	210520000	210810000	211260000	211370000	1518	0.260188	UI_310
chr1	210520000	210530000	chr1	211300000	211310000	11	1.20656927602428e-05	0.000517611	210520000	210810000	211260000	211370000	1518	0.260188	UI_311
chr1	212650000	212660000	chr1	212780000	212790000	157	2.57532559464911e-80	3.46896098120585e-76	212620000	212720000	212680000	212950000	4242	0.314815	UI_312
chr1	212650000	212660000	chr1	212840000	212850000	122	5.36683661416875e-58	2.77023362376604e-54	212620000	212720000	212680000	212950000	4242	0.314815	UI_313
chr1	212650000	212660000	chr1	212730000	212740000	187	8.06378743438267e-54	3.40883769099452e-50	212620000	212720000	212680000	212950000	4242	0.314815	UI_314
chr1	212690000	212700000	chr1	212730000	212740000	137	2.0822563917873e-21	9.63322530420647e-19	212620000	212720000	212680000	212950000	4242	0.314815	UI_315
chr1	212650000	212660000	chr1	212870000	212880000	44	1.24464335257777e-15	3.04419930810371e-13	212620000	212720000	212680000	212950000	4242	0.314815	UI_316
chr1	212650000	212660000	chr1	212920000	212930000	35	1.73945406869097e-15	4.1779914774411e-13	212620000	212720000	212680000	212950000	4242	0.314815	UI_317
chr1	212640000	212650000	chr1	212810000	212820000	41	1.90442269983439e-14	4.00844628346283e-12	212620000	212720000	212680000	212950000	4242	0.314815	UI_318
chr1	212650000	212660000	chr1	212680000	212690000	115	1.7563891140852e-12	2.81290841318172e-10	212620000	212720000	212680000	212950000	4242	0.314815	UI_319
chr1	212690000	212700000	chr1	212780000	212790000	57	3.80024239549498e-12	5.79002607825275e-10	212620000	212720000	212680000	212950000	4242	0.314815	UI_320
chr1	212620000	212630000	chr1	212840000	212850000	30	3.30393833769464e-08	2.55317438450866e-06	212620000	212720000	212680000	212950000	4242	0.314815	UI_321
chr1	226840000	226850000	chr1	227000000	227010000	201	4.11363337966996e-119	2.01816589635374e-114	226770000	226970000	226950000	227060000	3779	0.390909	UI_322
chr1	226790000	226800000	chr1	227000000	227010000	73	2.55235497711449e-33	3.18453983729532e-30	226770000	226970000	226950000	227060000	3779	0.390909	UI_323
chr1	226920000	226930000	chr1	227000000	227010000	110	8.7613678281312e-33	1.05073262925689e-29	226770000	226970000	226950000	227060000	3779	0.390909	UI_324
chr1	226960000	226970000	chr1	227000000	227010000	144	2.91615341143595e-27	2.2946411354984e-24	226770000	226970000	226950000	227060000	3779	0.390909	UI_325
chr1	226840000	226850000	chr1	227030000	227040000	42	8.90175743068133e-20	3.47428481638561e-17	226770000	226970000	226950000	227060000	3779	0.390909	UI_326
chr1	226850000	226860000	chr1	226960000	226970000	61	3.43801381841928e-19	1.26449152743805e-16	226770000	226970000	226950000	227060000	3779	0.390909	UI_327
chr1	226880000	226890000	chr1	227000000	227010000	61	6.93784801434708e-18	2.20824587296293e-15	226770000	226970000	226950000	227060000	3779	0.390909	UI_328
chr1	226780000	226790000	chr1	227030000	227040000	13	3.84808342972228e-05	0.00143135	226770000	226970000	226950000	227060000	3779	0.390909	UI_329
chr1	53390000	53400000	chr1	53660000	53670000	54	3.56834350042788e-31	3.82042575763267e-28	53340000	53560000	53600000	53690000	2298	0.434343	UI_330
chr1	53510000	53520000	chr1	53640000	53650000	64	9.96908796999989e-27	7.5011334263599e-24	53340000	53560000	53600000	53690000	2298	0.434343	UI_331
chr1	53550000	53560000	chr1	53640000	53650000	51	1.30539411046653e-15	3.18557385612214e-13	53340000	53560000	53600000	53690000	2298	0.434343	UI_332
chr1	53420000	53430000	chr1	53660000	53670000	36	1.85967843547358e-14	3.91889754932336e-12	53340000	53560000	53600000	53690000	2298	0.434343	UI_333
chr1	53520000	53530000	chr1	53600000	53610000	67	2.11426633985949e-12	3.34459053655693e-10	53340000	53560000	53600000	53690000	2298	0.434343	UI_334
chr1	53480000	53490000	chr1	53610000	53620000	39	3.94991910055847e-11	5.15127171000233e-09	53340000	53560000	53600000	53690000	2298	0.434343	UI_335
chr1	53480000	53490000	chr1	53650000	53660000	27	2.17304603341558e-10	2.5095671192417e-08	53340000	53560000	53600000	53690000	2298	0.434343	UI_336
chr1	53360000	53370000	chr1	53660000	53670000	22	3.65848570208572e-07	2.27023224680438e-05	53340000	53560000	53600000	53690000	2298	0.434343	UI_337
chr1	53390000	53400000	chr1	53630000	53640000	19	6.46679737098939e-06	0.000298117	53340000	53560000	53600000	53690000	2298	0.434343	UI_338
chr1	53420000	53430000	chr1	53630000	53640000	18	9.10917943525277e-05	0.00302569	53340000	53560000	53600000	53690000	2298	0.434343	UI_339
chr1	53450000	53460000	chr1	53660000	53670000	23	0.000309307	0.00862464	53340000	53560000	53600000	53690000	2298	0.434343	UI_340
chr1	110330000	110340000	chr1	110520000	110530000	163	4.94296033476818e-116	2.16663159711161e-111	110300000	110490000	110490000	110580000	2996	0.432749	UI_341
chr1	110410000	110420000	chr1	110520000	110530000	120	1.93013072463529e-41	4.07429736951581e-38	110300000	110490000	110490000	110580000	2996	0.432749	UI_342
chr1	110300000	110310000	chr1	110520000	110530000	59	7.23283676863983e-27	5.50383730263445e-24	110300000	110490000	110490000	110580000	2996	0.432749	UI_343
chr1	110460000	110470000	chr1	110520000	110530000	95	7.99894222643636e-26	5.5602536676069e-23	110300000	110490000	110490000	110580000	2996	0.432749	UI_344
chr1	110370000	110380000	chr1	110520000	110530000	48	1.37437419275197e-17	4.2333875882275e-15	110300000	110490000	110490000	110580000	2996	0.432749	UI_345
chr1	110330000	110340000	chr1	110550000	110560000	44	7.12326416859064e-14	1.3885817093687e-11	110300000	110490000	110490000	110580000	2996	0.432749	UI_346
chr1	110300000	110310000	chr1	110570000	110580000	28	4.39522825861647e-11	5.69107643012187e-09	110300000	110490000	110490000	110580000	2996	0.432749	UI_347
chr1	110330000	110340000	chr1	110490000	110500000	37	2.02155305149324e-09	1.97117724327347e-07	110300000	110490000	110490000	110580000	2996	0.432749	UI_348
chr1	110410000	110420000	chr1	110550000	110560000	39	0.000135717	0.00426717	110300000	110490000	110490000	110580000	2996	0.432749	UI_349
chr1	203320000	203330000	chr1	203450000	203460000	183	7.41350271272921e-88	1.28924693715619e-83	203230000	203380000	203390000	203510000	4094	0.416667	UI_350
chr1	203320000	203330000	chr1	203410000	203420000	151	5.68145617455721e-48	1.74409159005027e-44	203230000	203380000	203390000	203510000	4094	0.416667	UI_351
chr1	203240000	203250000	chr1	203450000	203460000	52	4.96264926748962e-24	2.94656012277108e-21	203230000	203380000	203390000	203510000	4094	0.416667	UI_352
chr1	203370000	203380000	chr1	203410000	203420000	116	3.79742284451101e-22	1.89122656478578e-19	203230000	203380000	203390000	203510000	4094	0.416667	UI_353
chr1	203370000	203380000	chr1	203450000	203460000	76	2.9074642730136e-16	7.67381434374795e-14	203230000	203380000	203390000	203510000	4094	0.416667	UI_354
chr1	203320000	203330000	chr1	203480000	203490000	70	9.65328033164372e-13	1.60642757023054e-10	203230000	203380000	203390000	203510000	4094	0.416667	UI_355
chr1	203270000	203280000	chr1	203450000	203460000	36	4.12096280831798e-11	5.35872070330754e-09	203230000	203380000	203390000	203510000	4094	0.416667	UI_356
chr1	203230000	203240000	chr1	203410000	203420000	24	2.99763931459981e-08	2.33653284044566e-06	203230000	203380000	203390000	203510000	4094	0.416667	UI_357
chr1	203250000	203260000	chr1	203480000	203490000	21	2.40167678174434e-05	0.000947871	203230000	203380000	203390000	203510000	4094	0.416667	UI_358
chr1	21580000	21590000	chr1	21660000	21670000	204	2.11796773927604e-74	2.23613319467013e-70	21540000	21650000	21600000	21710000	7010	0.578512	UI_359
chr1	21580000	21590000	chr1	21690000	21700000	108	1.79413756589771e-49	6.03985201729222e-46	21540000	21650000	21600000	21710000	7010	0.578512	UI_360
chr1	21620000	21630000	chr1	21640000	21650000	287	4.2243629858914e-29	3.85661875582946e-26	21540000	21650000	21600000	21710000	7010	0.578512	UI_361
chr1	21580000	21590000	chr1	21600000	21610000	263	2.90945711952857e-26	2.10549728127631e-23	21540000	21650000	21600000	21710000	7010	0.578512	UI_362
chr1	21580000	21590000	chr1	21630000	21640000	173	6.32086345549434e-26	4.43820390264091e-23	21540000	21650000	21600000	21710000	7010	0.578512	UI_363
chr1	21550000	21560000	chr1	21690000	21700000	49	5.67070707376309e-24	3.34763964870083e-21	21540000	21650000	21600000	21710000	7010	0.578512	UI_364
chr1	21550000	21560000	chr1	21660000	21670000	60	2.18868517175078e-17	6.58685473738651e-15	21540000	21650000	21600000	21710000	7010	0.578512	UI_365
chr1	21620000	21630000	chr1	21670000	21680000	74	9.83140210282377e-14	1.88027138676839e-11	21540000	21650000	21600000	21710000	7010	0.578512	UI_366
chr1	21550000	21560000	chr1	21620000	21630000	41	7.30275697567466e-05	0.00249909	21540000	21650000	21600000	21710000	7010	0.578512	UI_367
chr1	90270000	90280000	chr1	90450000	90460000	60	3.88970878076704e-39	7.16642626015741e-36	90220000	90360000	90400000	90480000	2348	0.625	UI_368
chr1	90320000	90330000	chr1	90420000	90430000	76	3.92493658264844e-26	2.80938775535519e-23	90220000	90360000	90400000	90480000	2348	0.625	UI_369
chr1	90300000	90310000	chr1	90450000	90460000	44	7.22358809865269e-21	3.15671803433209e-18	90220000	90360000	90400000	90480000	2348	0.625	UI_370
chr1	90270000	90280000	chr1	90410000	90420000	50	3.64524805715544e-20	1.48029596969827e-17	90220000	90360000	90400000	90480000	2348	0.625	UI_371
chr1	90240000	90250000	chr1	90460000	90470000	31	5.16035614744566e-12	7.71242668187822e-10	90220000	90360000	90400000	90480000	2348	0.625	UI_372
chr1	90350000	90360000	chr1	90430000	90440000	43	3.87983009166186e-11	5.06548623759117e-09	90220000	90360000	90400000	90480000	2348	0.625	UI_373
chr1	90350000	90360000	chr1	90400000	90410000	42	2.01765453624395e-05	0.0008139	90220000	90360000	90400000	90480000	2348	0.625	UI_374
chr1	90330000	90340000	chr1	90460000	90470000	26	4.16622103887994e-05	0.00153442	90220000	90360000	90400000	90480000	2348	0.625	UI_375
chr1	183200000	183210000	chr1	183240000	183250000	286	5.20385700208177e-51	1.89306618029486e-47	182900000	183220000	183230000	183300000	4366	0.366071	UI_376
chr1	182920000	182930000	chr1	183240000	183250000	74	1.00223474903775e-48	3.22087530809362e-45	182900000	183220000	183230000	183300000	4366	0.366071	UI_377
chr1	182990000	183000000	chr1	183240000	183250000	92	5.38425586180428e-47	1.56439941684338e-43	182900000	183220000	183230000	183300000	4366	0.366071	UI_378
chr1	183110000	183120000	chr1	183240000	183250000	99	4.68839313601999e-38	8.04608006953678e-35	182900000	183220000	183230000	183300000	4366	0.366071	UI_379
chr1	183020000	183030000	chr1	183240000	183250000	78	3.77467764502882e-31	4.03023127265031e-28	182900000	183220000	183230000	183300000	4366	0.366071	UI_380
chr1	183060000	183070000	chr1	183240000	183250000	87	2.35135038483177e-28	2.02643809815004e-25	182900000	183220000	183230000	183300000	4366	0.366071	UI_381
chr1	183160000	183170000	chr1	183240000	183250000	122	2.05800298735048e-20	8.57581856394734e-18	182900000	183220000	183230000	183300000	4366	0.366071	UI_382
chr1	182950000	182960000	chr1	183240000	183250000	34	1.50807833232519e-15	3.65210514303302e-13	182900000	183220000	183230000	183300000	4366	0.366071	UI_383
chr1	183000000	183010000	chr1	183280000	183290000	26	2.38409154798033e-09	2.29325729120012e-07	182900000	183220000	183230000	183300000	4366	0.366071	UI_384
chr1	27720000	27730000	chr1	27930000	27940000	43	1.56244066345128e-26	1.15532160089916e-23	27690000	27770000	27790000	27950000	2098	0.546875	UI_385
chr1	27740000	27750000	chr1	27860000	27870000	61	2.70261211513436e-20	1.11279697480831e-17	27690000	27770000	27790000	27950000	2098	0.546875	UI_386
chr1	27750000	27760000	chr1	27810000	27820000	59	6.92223368663293e-15	1.5428349915128e-12	27690000	27770000	27790000	27950000	2098	0.546875	UI_387
chr1	27750000	27760000	chr1	27920000	27930000	39	8.48183369522902e-15	1.86975019572253e-12	27690000	27770000	27790000	27950000	2098	0.546875	UI_388
chr1	27710000	27720000	chr1	27860000	27870000	36	1.47611468089192e-08	1.2231674843583e-06	27690000	27770000	27790000	27950000	2098	0.546875	UI_389
chr1	27690000	27700000	chr1	27930000	27940000	21	2.78825301367502e-08	2.18730530166447e-06	27690000	27770000	27790000	27950000	2098	0.546875	UI_390
chr1	27720000	27730000	chr1	27830000	27840000	28	5.02912433565606e-08	3.74545459338523e-06	27690000	27770000	27790000	27950000	2098	0.546875	UI_391
chr1	27750000	27760000	chr1	27890000	27900000	27	2.83004417264977e-07	1.79925105638414e-05	27690000	27770000	27790000	27950000	2098	0.546875	UI_392
chr1	27720000	27730000	chr1	27900000	27910000	20	1.11602262755969e-05	0.000483176	27690000	27770000	27790000	27950000	2098	0.546875	UI_393
chr1	181000000	181010000	chr1	181110000	181120000	64	1.23471807535002e-24	7.74426588516153e-22	180850000	181020000	181030000	181150000	2634	0.392157	UI_394
chr1	181000000	181010000	chr1	181040000	181050000	122	8.60358844492102e-19	3.03420018251398e-16	180850000	181020000	181030000	181150000	2634	0.392157	UI_395
chr1	180880000	180890000	chr1	181100000	181110000	39	2.00893461522298e-15	4.78623805363292e-13	180850000	181020000	181030000	181150000	2634	0.392157	UI_396
chr1	180960000	180970000	chr1	181110000	181120000	37	2.72216754305846e-14	5.61418683439925e-12	180850000	181020000	181030000	181150000	2634	0.392157	UI_397
chr1	180920000	180930000	chr1	181110000	181120000	27	1.0049169996941e-12	1.66820745300144e-10	180850000	181020000	181030000	181150000	2634	0.392157	UI_398
chr1	181000000	181010000	chr1	181080000	181090000	75	1.32880734428372e-12	2.16699801808054e-10	180850000	181020000	181030000	181150000	2634	0.392157	UI_399
chr1	180850000	180860000	chr1	181100000	181110000	36	1.12053716462428e-11	1.59156664870038e-09	180850000	181020000	181030000	181150000	2634	0.392157	UI_400
chr1	180960000	180970000	chr1	181060000	181070000	44	8.15755956629921e-09	7.1037806380074e-07	180850000	181020000	181030000	181150000	2634	0.392157	UI_401
chr1	180870000	180880000	chr1	181140000	181150000	20	4.46912083677011e-08	3.36439896093758e-06	180850000	181020000	181030000	181150000	2634	0.392157	UI_402
chr1	64120000	64130000	chr1	64700000	64710000	29	2.32757218784464e-20	9.65024999667186e-18	64120000	64210000	64580000	64720000	891	0.5	UI_403
chr1	64140000	64150000	chr1	64600000	64610000	26	2.78225284435387e-18	9.25787838897823e-16	64120000	64210000	64580000	64720000	891	0.5	UI_404
chr1	64120000	64130000	chr1	64630000	64640000	26	4.08662701265188e-18	1.33404080212917e-15	64120000	64210000	64580000	64720000	891	0.5	UI_405
chr1	64180000	64190000	chr1	64600000	64610000	23	1.625032133858e-14	3.45039768460788e-12	64120000	64210000	64580000	64720000	891	0.5	UI_406
chr1	64180000	64190000	chr1	64630000	64640000	20	1.67075356559979e-12	2.68492731412604e-10	64120000	64210000	64580000	64720000	891	0.5	UI_407
chr1	64120000	64130000	chr1	64670000	64680000	18	1.44915304920165e-11	2.02436471298243e-09	64120000	64210000	64580000	64720000	891	0.5	UI_408
chr1	64150000	64160000	chr1	64700000	64710000	14	5.28201753915388e-08	3.9169956309512e-06	64120000	64210000	64580000	64720000	891	0.5	UI_409
chr1	64180000	64190000	chr1	64660000	64670000	13	2.75799967960678e-07	1.75785182322959e-05	64120000	64210000	64580000	64720000	891	0.5	UI_410
chr1	64150000	64160000	chr1	64660000	64670000	11	1.27937893943911e-06	7.00856803876297e-05	64120000	64210000	64580000	64720000	891	0.5	UI_411
chr1	64180000	64190000	chr1	64700000	64710000	12	1.95116762744572e-05	0.000790371	64120000	64210000	64580000	64720000	891	0.5	UI_412
chr1	156070000	156080000	chr1	156180000	156190000	152	3.24550271863285e-45	8.464084321445e-42	156040000	156140000	156160000	156310000	3249	0.413333	UI_413
chr1	156120000	156130000	chr1	156180000	156190000	80	3.74528990949184e-26	2.68403375582148e-23	156040000	156140000	156160000	156310000	3249	0.413333	UI_414
chr1	156070000	156080000	chr1	156210000	156220000	57	3.74028722975683e-18	1.22652200679604e-15	156040000	156140000	156160000	156310000	3249	0.413333	UI_415
chr1	156070000	156080000	chr1	156300000	156310000	49	2.74570138797678e-16	7.26856973962288e-14	156040000	156140000	156160000	156310000	3249	0.413333	UI_416
chr1	156070000	156080000	chr1	156270000	156280000	48	8.63252101618637e-15	1.90096971383891e-12	156040000	156140000	156160000	156310000	3249	0.413333	UI_417
chr1	156040000	156050000	chr1	156180000	156190000	27	1.5280562880062e-07	1.02906737689267e-05	156040000	156140000	156160000	156310000	3249	0.413333	UI_418
chr1	156070000	156080000	chr1	156240000	156250000	49	8.64215493382828e-06	0.000385514	156040000	156140000	156160000	156310000	3249	0.413333	UI_419
chr1	203830000	203840000	chr1	204090000	204100000	73	4.60759429374501e-63	3.00115794627414e-59	203800000	203910000	204000000	204150000	1497	0.387879	UI_420
chr1	203830000	203840000	chr1	204040000	204050000	46	1.27842999138131e-26	9.51961891511638e-24	203800000	203910000	204000000	204150000	1497	0.387879	UI_421
chr1	203860000	203870000	chr1	204090000	204100000	25	9.32549809813574e-14	1.78856979673687e-11	203800000	203910000	204000000	204150000	1497	0.387879	UI_422
chr1	203860000	203870000	chr1	204040000	204050000	27	1.69062722136312e-12	2.71437669564365e-10	203800000	203910000	204000000	204150000	1497	0.387879	UI_423
chr1	203830000	203840000	chr1	204010000	204020000	23	3.27461083716605e-10	3.66881690095903e-08	203800000	203910000	204000000	204150000	1497	0.387879	UI_424
chr1	203830000	203840000	chr1	204140000	204150000	20	8.07454351300922e-10	8.44740163875125e-08	203800000	203910000	204000000	204150000	1497	0.387879	UI_425
chr1	203800000	203810000	chr1	204100000	204110000	18	6.51952719407824e-08	4.74355386889062e-06	203800000	203910000	204000000	204150000	1497	0.387879	UI_426
chr1	203890000	203900000	chr1	204090000	204100000	17	5.00010415658633e-07	3.00868528387245e-05	203800000	203910000	204000000	204150000	1497	0.387879	UI_427
chr1	203890000	203900000	chr1	204040000	204050000	20	8.15528354575342e-07	4.67847217126811e-05	203800000	203910000	204000000	204150000	1497	0.387879	UI_428
chr1	203860000	203870000	chr1	204120000	204130000	10	0.000177996	0.00538365	203800000	203910000	204000000	204150000	1497	0.387879	UI_429
chr1	8150000	8160000	chr1	8290000	8300000	64	4.82819956331965e-23	2.61116630157911e-20	8040000	8160000	8250000	8340000	1937	0.601852	UI_430
chr1	8080000	8090000	chr1	8290000	8300000	39	1.07995081291927e-18	3.76536583397275e-16	8040000	8160000	8250000	8340000	1937	0.601852	UI_431
chr1	8120000	8130000	chr1	8290000	8300000	44	7.08241380371132e-16	1.78183608491606e-13	8040000	8160000	8250000	8340000	1937	0.601852	UI_432
chr1	8080000	8090000	chr1	8260000	8270000	34	1.64267149484678e-13	3.04662265058846e-11	8040000	8160000	8250000	8340000	1937	0.601852	UI_433
chr1	8040000	8050000	chr1	8290000	8300000	27	5.66363234517717e-12	8.41123683627483e-10	8040000	8160000	8250000	8340000	1937	0.601852	UI_434
chr1	8150000	8160000	chr1	8250000	8260000	52	2.22489142615657e-11	3.01702735911422e-09	8040000	8160000	8250000	8340000	1937	0.601852	UI_435
chr1	8120000	8130000	chr1	8260000	8270000	33	1.25018869879073e-07	8.57845673941442e-06	8040000	8160000	8250000	8340000	1937	0.601852	UI_436
chr1	8080000	8090000	chr1	8330000	8340000	17	1.65476941655939e-05	0.000683805	8040000	8160000	8250000	8340000	1937	0.601852	UI_437
chr1	8040000	8050000	chr1	8260000	8270000	16	0.000173643	0.00527029	8040000	8160000	8250000	8340000	1937	0.601852	UI_438
chr1	8450000	8460000	chr1	8580000	8590000	69	3.23341117220418e-23	1.77616274439884e-20	8430000	8530000	8540000	8630000	2188	0.688889	UI_439
chr1	8450000	8460000	chr1	8610000	8620000	45	1.52386983101691e-16	4.15936350253594e-14	8430000	8530000	8540000	8630000	2188	0.688889	UI_440
chr1	8520000	8530000	chr1	8570000	8580000	74	7.03857052133575e-12	1.03080587656706e-09	8430000	8530000	8540000	8630000	2188	0.688889	UI_441
chr1	8480000	8490000	chr1	8600000	8610000	33	1.18453676424599e-10	1.42993830873893e-08	8430000	8530000	8540000	8630000	2188	0.688889	UI_442
chr1	8450000	8460000	chr1	8540000	8550000	53	7.98034942710988e-10	8.35547819315141e-08	8430000	8530000	8540000	8630000	2188	0.688889	UI_443
chr1	8490000	8500000	chr1	8560000	8570000	36	3.44876084701405e-08	2.65486421219291e-06	8430000	8530000	8540000	8630000	2188	0.688889	UI_444
chr1	8510000	8520000	chr1	8600000	8610000	27	9.65890855118944e-07	5.44844929311093e-05	8430000	8530000	8540000	8630000	2188	0.688889	UI_445
chr1	165600000	165610000	chr1	165860000	165870000	170	4.23146374993316e-109	1.48381090548525e-104	165560000	165840000	165810000	165890000	3712	0.294643	UI_446
chr1	165730000	165740000	chr1	165860000	165870000	151	1.27172655817934e-64	8.88976096516078e-61	165560000	165840000	165810000	165890000	3712	0.294643	UI_447
chr1	165790000	165800000	chr1	165860000	165870000	208	8.21515096533903e-62	5.06996264167727e-58	165560000	165840000	165810000	165890000	3712	0.294643	UI_448
chr1	165820000	165830000	chr1	165860000	165870000	238	6.41584727807171e-39	1.16500153081e-35	165560000	165840000	165810000	165890000	3712	0.294643	UI_449
chr1	165660000	165670000	chr1	165860000	165870000	80	2.71176258205639e-32	3.131371975627e-29	165560000	165840000	165810000	165890000	3712	0.294643	UI_450
chr1	165700000	165710000	chr1	165860000	165870000	62	3.36277314210092e-23	1.84353053215181e-20	165560000	165840000	165810000	165890000	3712	0.294643	UI_451
chr1	165560000	165570000	chr1	165860000	165870000	47	2.47500668157086e-21	1.13651720237644e-18	165560000	165840000	165810000	165890000	3712	0.294643	UI_452
chr1	165600000	165610000	chr1	165820000	165830000	50	3.51888966981555e-17	1.03555375912006e-14	165560000	165840000	165810000	165890000	3712	0.294643	UI_453
chr1	165630000	165640000	chr1	165860000	165870000	35	4.54199384825844e-06	0.000217679	165560000	165840000	165810000	165890000	3712	0.294643	UI_454
chr1	165760000	165770000	chr1	165860000	165870000	48	0.000342197	0.0093973	165560000	165840000	165810000	165890000	3712	0.294643	UI_455
chr1	53950000	53960000	chr1	54200000	54210000	75	5.92271166682609e-50	2.04205093433629e-46	53900000	54060000	54180000	54310000	2081	0.346154	UI_456
chr1	54000000	54010000	chr1	54200000	54210000	104	3.90840711892396e-46	1.07568415807813e-42	53900000	54060000	54180000	54310000	2081	0.346154	UI_457
chr1	54040000	54050000	chr1	54200000	54210000	83	3.35010651657209e-32	3.84689343064842e-29	53900000	54060000	54180000	54310000	2081	0.346154	UI_458
chr1	54000000	54010000	chr1	54230000	54240000	53	8.98688796256145e-24	5.19716191761243e-21	53900000	54060000	54180000	54310000	2081	0.346154	UI_459
chr1	53950000	53960000	chr1	54230000	54240000	27	4.1487467092887e-14	8.35025022399725e-12	53900000	54060000	54180000	54310000	2081	0.346154	UI_460
chr1	53900000	53910000	chr1	54200000	54210000	32	2.96008782339215e-10	3.34092954899585e-08	53900000	54060000	54180000	54310000	2081	0.346154	UI_461
chr1	54000000	54010000	chr1	54260000	54270000	24	4.91515292683632e-08	3.66882596513343e-06	53900000	54060000	54180000	54310000	2081	0.346154	UI_462
chr1	54000000	54010000	chr1	54300000	54310000	22	6.08608972875677e-08	4.45605178548602e-06	53900000	54060000	54180000	54310000	2081	0.346154	UI_463
chr1	94500000	94510000	chr1	94790000	94800000	93	9.62611826479875e-70	8.30936162504957e-66	94420000	94600000	94750000	94830000	1913	0.423611	UI_464
chr1	94530000	94540000	chr1	94790000	94800000	47	3.72587771833361e-21	1.67728356968371e-18	94420000	94600000	94750000	94830000	1913	0.423611	UI_465
chr1	94560000	94570000	chr1	94790000	94800000	52	2.50422644199882e-19	9.3441483878608e-17	94420000	94600000	94750000	94830000	1913	0.423611	UI_466
chr1	94440000	94450000	chr1	94790000	94800000	32	3.67530553226716e-16	9.58124721399816e-14	94420000	94600000	94750000	94830000	1913	0.423611	UI_467
chr1	94500000	94510000	chr1	94750000	94760000	19	3.90874647752727e-07	2.40936872908888e-05	94420000	94600000	94750000	94830000	1913	0.423611	UI_468
chr1	94490000	94500000	chr1	94820000	94830000	18	1.73066016795266e-06	9.18659766425589e-05	94420000	94600000	94750000	94830000	1913	0.423611	UI_469
chr1	94470000	94480000	chr1	94780000	94790000	20	3.32719167692121e-06	0.000164951	94420000	94600000	94750000	94830000	1913	0.423611	UI_470
chr1	94590000	94600000	chr1	94790000	94800000	21	6.4682814421044e-05	0.00224973	94420000	94600000	94750000	94830000	1913	0.423611	UI_471
chr1	162030000	162040000	chr1	162200000	162210000	75	3.98150946771894e-38	6.86599944806232e-35	162010000	162070000	162170000	162380000	1271	0.468254	UI_472
chr1	162030000	162040000	chr1	162240000	162250000	41	2.35706864349609e-25	1.57429929170033e-22	162010000	162070000	162170000	162380000	1271	0.468254	UI_473
chr1	162020000	162030000	chr1	162340000	162350000	29	2.02093631776131e-17	6.1086571289896e-15	162010000	162070000	162170000	162380000	1271	0.468254	UI_474
chr1	162050000	162060000	chr1	162170000	162180000	28	2.31667660756234e-10	2.66230294156422e-08	162010000	162070000	162170000	162380000	1271	0.468254	UI_475
chr1	162020000	162030000	chr1	162370000	162380000	19	3.02698131831791e-10	3.41124566300649e-08	162010000	162070000	162170000	162380000	1271	0.468254	UI_476
chr1	162020000	162030000	chr1	162170000	162180000	24	5.13157428326309e-08	3.81556379242738e-06	162010000	162070000	162170000	162380000	1271	0.468254	UI_477
chr1	162020000	162030000	chr1	162280000	162290000	16	5.56662694461688e-08	4.10836997339884e-06	162010000	162070000	162170000	162380000	1271	0.468254	UI_478
chr1	162020000	162030000	chr1	162310000	162320000	15	9.15411880732993e-07	5.19056070919083e-05	162010000	162070000	162170000	162380000	1271	0.468254	UI_479
chr1	162060000	162070000	chr1	162240000	162250000	15	7.4617595217113e-06	0.000338482	162010000	162070000	162170000	162380000	1271	0.468254	UI_480
chr1	162050000	162060000	chr1	162340000	162350000	13	4.80128484196961e-05	0.00173659	162010000	162070000	162170000	162380000	1271	0.468254	UI_481
chr1	162060000	162070000	chr1	162200000	162210000	22	0.000160897	0.00493743	162010000	162070000	162170000	162380000	1271	0.468254	UI_482
chr1	36610000	36620000	chr1	36750000	36760000	71	2.73988105528941e-31	2.96084663492591e-28	36550000	36700000	36740000	36820000	1988	0.508333	UI_483
chr1	36570000	36580000	chr1	36740000	36750000	47	8.27278652198918e-18	2.61169120880678e-15	36550000	36700000	36740000	36820000	1988	0.508333	UI_484
chr1	36650000	36660000	chr1	36750000	36760000	56	1.11065852283137e-16	3.08217019588671e-14	36550000	36700000	36740000	36820000	1988	0.508333	UI_485
chr1	36550000	36560000	chr1	36780000	36790000	28	7.7179324845326e-10	8.10158463851753e-08	36550000	36700000	36740000	36820000	1988	0.508333	UI_486
chr1	36680000	36690000	chr1	36740000	36750000	54	1.10016975328594e-08	9.33943258137398e-07	36550000	36700000	36740000	36820000	1988	0.508333	UI_487
chr1	36610000	36620000	chr1	36780000	36790000	33	4.25650025365179e-08	3.21772152268885e-06	36550000	36700000	36740000	36820000	1988	0.508333	UI_488
chr1	36610000	36620000	chr1	36810000	36820000	28	2.59153104503577e-06	0.000131926	36550000	36700000	36740000	36820000	1988	0.508333	UI_489
chr1	36580000	36590000	chr1	36780000	36790000	22	2.64959659019516e-05	0.0010332	36550000	36700000	36740000	36820000	1988	0.508333	UI_490
chr1	39570000	39580000	chr1	39650000	39660000	148	1.99243617250523e-50	7.00968669867273e-47	39550000	39630000	39640000	39780000	2980	0.517857	UI_491
chr1	39570000	39580000	chr1	39730000	39740000	56	7.51221355072915e-25	4.80413872433503e-22	39550000	39630000	39640000	39780000	2980	0.517857	UI_492
chr1	39600000	39610000	chr1	39650000	39660000	90	1.69918148716637e-20	7.14348988382868e-18	39550000	39630000	39640000	39780000	2980	0.517857	UI_493
chr1	39570000	39580000	chr1	39690000	39700000	52	3.21933325217474e-17	9.51220345811205e-15	39550000	39630000	39640000	39780000	2980	0.517857	UI_494
chr1	39620000	39630000	chr1	39720000	39730000	49	9.38833782414645e-12	1.34896067472764e-09	39550000	39630000	39640000	39780000	2980	0.517857	UI_495
chr1	39560000	39570000	chr1	39770000	39780000	21	6.80326956027687e-10	7.21221903757382e-08	39550000	39630000	39640000	39780000	2980	0.517857	UI_496
chr1	66720000	66730000	chr1	66900000	66910000	66	4.17711271823061e-38	7.19519068849474e-35	66700000	66760000	66880000	67020000	1655	0.642857	UI_497
chr1	66720000	66730000	chr1	66960000	66970000	57	1.4420088863536e-31	1.59142844547314e-28	66700000	66760000	66880000	67020000	1655	0.642857	UI_498
chr1	66720000	66730000	chr1	66930000	66940000	45	1.21100430339748e-18	4.19861881404832e-16	66700000	66760000	66880000	67020000	1655	0.642857	UI_499
chr1	66720000	66730000	chr1	66990000	67000000	34	5.01353979967751e-13	8.68801167996315e-11	66700000	66760000	66880000	67020000	1655	0.642857	UI_500
chr1	66750000	66760000	chr1	66990000	67000000	26	5.81424751080437e-05	0.00205111	66700000	66760000	66880000	67020000	1655	0.642857	UI_501
chr1	27060000	27070000	chr1	27090000	27100000	221	1.2043738814524e-40	2.42671172088189e-37	26990000	27100000	27040000	27130000	4525	0.525253	UI_502
chr1	27020000	27030000	chr1	27090000	27100000	138	8.06730089804745e-40	1.54625753907477e-36	26990000	27100000	27040000	27130000	4525	0.525253	UI_503
chr1	27030000	27040000	chr1	27060000	27070000	143	2.46433814371845e-23	1.36938329678545e-20	26990000	27100000	27040000	27130000	4525	0.525253	UI_504
chr1	27090000	27100000	chr1	27110000	27120000	225	1.37580627134356e-22	7.13741012354388e-20	26990000	27100000	27040000	27130000	4525	0.525253	UI_505
chr1	27010000	27020000	chr1	27120000	27130000	44	9.77413581289629e-14	1.87008826043911e-11	26990000	27100000	27040000	27130000	4525	0.525253	UI_506
chr1	27060000	27070000	chr1	27120000	27130000	56	3.46891372877682e-09	3.23633810655541e-07	26990000	27100000	27040000	27130000	4525	0.525253	UI_507
chr1	26990000	27000000	chr1	27090000	27100000	44	1.79225204258599e-08	1.46155529601822e-06	26990000	27100000	27040000	27130000	4525	0.525253	UI_508
chr1	27000000	27010000	chr1	27060000	27070000	37	0.000181088	0.00546362	26990000	27100000	27040000	27130000	4525	0.525253	UI_509
chr1	59520000	59530000	chr1	60190000	60200000	29	1.22627595873039e-21	5.80037693958094e-19	59460000	59560000	60130000	60240000	806	0.518182	UI_510
chr1	59480000	59490000	chr1	60170000	60180000	23	7.1180896357848e-16	1.79026415591515e-13	59460000	59560000	60130000	60240000	806	0.518182	UI_511
chr1	59480000	59490000	chr1	60220000	60230000	22	7.74057859358015e-16	1.93866518600234e-13	59460000	59560000	60130000	60240000	806	0.518182	UI_512
chr1	59520000	59530000	chr1	60160000	60170000	22	1.31545729814152e-14	2.82948375244431e-12	59460000	59560000	60130000	60240000	806	0.518182	UI_513
chr1	59520000	59530000	chr1	60220000	60230000	19	1.94387495625559e-12	3.09247292848902e-10	59460000	59560000	60130000	60240000	806	0.518182	UI_514
chr1	59470000	59480000	chr1	60130000	60140000	14	4.65816766453347e-08	3.49348594588128e-06	59460000	59560000	60130000	60240000	806	0.518182	UI_515
chr1	59550000	59560000	chr1	60190000	60200000	12	2.01988033924534e-06	0.000105503	59460000	59560000	60130000	60240000	806	0.518182	UI_516
chr1	144930000	144940000	chr1	145050000	145060000	131	1.17242398480763e-44	2.96717372797989e-41	144880000	144950000	144990000	145100000	3787	0.675325	UI_517
chr1	144930000	144940000	chr1	145080000	145090000	96	2.77974336971173e-25	1.84474022430668e-22	144880000	144950000	144990000	145100000	3787	0.675325	UI_518
chr1	144930000	144940000	chr1	145010000	145020000	135	2.48650591575709e-22	1.25827340657864e-19	144880000	144950000	144990000	145100000	3787	0.675325	UI_519
chr1	144900000	144910000	chr1	145080000	145090000	53	4.92486223812134e-15	1.1175474987909e-12	144880000	144950000	144990000	145100000	3787	0.675325	UI_520
chr1	144900000	144910000	chr1	145030000	145040000	60	1.51195826816308e-09	1.50737378327379e-07	144880000	144950000	144990000	145100000	3787	0.675325	UI_521
chr1	144900000	144910000	chr1	145000000	145010000	55	0.000270684	0.00770048	144880000	144950000	144990000	145100000	3787	0.675325	UI_522
chr1	26940000	26950000	chr1	27110000	27120000	93	9.82522850804942e-52	3.71710324842207e-48	26890000	26970000	26980000	27140000	2498	0.414062	UI_523
chr1	26940000	26950000	chr1	27020000	27030000	122	4.99873336829661e-47	1.45515278051365e-43	26890000	26970000	26980000	27140000	2498	0.414062	UI_524
chr1	26940000	26950000	chr1	27050000	27060000	77	2.23646247519207e-28	1.93069261794535e-25	26890000	26970000	26980000	27140000	2498	0.414062	UI_525
chr1	26940000	26950000	chr1	26990000	27000000	81	1.65609086118847e-20	6.97027925230757e-18	26890000	26970000	26980000	27140000	2498	0.414062	UI_526
chr1	26900000	26910000	chr1	27090000	27100000	48	2.11565022410903e-19	7.95417549783268e-17	26890000	26970000	26980000	27140000	2498	0.414062	UI_527
chr1	26940000	26950000	chr1	27080000	27090000	49	5.53328575593132e-18	1.78079690914888e-15	26890000	26970000	26980000	27140000	2498	0.414062	UI_528
chr1	26900000	26910000	chr1	27120000	27130000	25	7.70130944041385e-11	9.58935770722633e-09	26890000	26970000	26980000	27140000	2498	0.414062	UI_529
chr1	169890000	169900000	chr1	170630000	170640000	39	9.14092809886172e-33	1.09404429562398e-29	169830000	170050000	170630000	170710000	726	0.414773	UI_530
chr1	169960000	169970000	chr1	170630000	170640000	31	1.95665376065182e-24	1.20448650366168e-21	169830000	170050000	170630000	170710000	726	0.414773	UI_531
chr1	169850000	169860000	chr1	170630000	170640000	19	1.34015446237575e-12	2.18450344926709e-10	169830000	170050000	170630000	170710000	726	0.414773	UI_532
chr1	169930000	169940000	chr1	170630000	170640000	20	3.32633027430419e-12	5.11034610536386e-10	169830000	170050000	170630000	170710000	726	0.414773	UI_533
chr1	169960000	169970000	chr1	170690000	170700000	17	1.63923952768388e-11	2.27044843142504e-09	169830000	170050000	170630000	170710000	726	0.414773	UI_534
chr1	169860000	169870000	chr1	170690000	170700000	14	9.40109695230945e-09	8.09069868947852e-07	169830000	170050000	170630000	170710000	726	0.414773	UI_535
chr1	169990000	170000000	chr1	170630000	170640000	16	1.9009998087735e-08	1.54186693210375e-06	169830000	170050000	170630000	170710000	726	0.414773	UI_536
chr1	170030000	170040000	chr1	170630000	170640000	17	5.07150899553126e-08	3.77399848365275e-06	169830000	170050000	170630000	170710000	726	0.414773	UI_537
chr1	169840000	169850000	chr1	170660000	170670000	13	1.59516261366833e-07	1.06985133351517e-05	169830000	170050000	170630000	170710000	726	0.414773	UI_538
chr1	169960000	169970000	chr1	170660000	170670000	13	2.66189146409114e-07	1.7022665718224e-05	169830000	170050000	170630000	170710000	726	0.414773	UI_539
chr1	169990000	170000000	chr1	170660000	170670000	10	0.000157467	0.00484689	169830000	170050000	170630000	170710000	726	0.414773	UI_540
chr1	204220000	204230000	chr1	204320000	204330000	53	3.48182330511145e-24	2.0947684717205e-21	204120000	204300000	204310000	204360000	1453	0.544444	UI_541
chr1	204180000	204190000	chr1	204330000	204340000	35	6.99374481969308e-20	2.75991822635696e-17	204120000	204300000	204310000	204360000	1453	0.544444	UI_542
chr1	204260000	204270000	chr1	204320000	204330000	59	1.63366007701975e-16	4.44293228735684e-14	204120000	204300000	204310000	204360000	1453	0.544444	UI_543
chr1	204150000	204160000	chr1	204330000	204340000	22	2.22099745009271e-11	3.01212890279136e-09	204120000	204300000	204310000	204360000	1453	0.544444	UI_544
chr1	204290000	204300000	chr1	204310000	204320000	79	3.24999253041216e-08	2.51530339251278e-06	204120000	204300000	204310000	204360000	1453	0.544444	UI_545
chr1	204120000	204130000	chr1	204340000	204350000	15	3.48406214167857e-07	2.17217895385704e-05	204120000	204300000	204310000	204360000	1453	0.544444	UI_546
chr1	16400000	16410000	chr1	16510000	16520000	100	8.72686358465663e-63	5.62599801437247e-59	16390000	16490000	16460000	16590000	2789	0.392308	UI_547
chr1	16400000	16410000	chr1	16470000	16480000	124	3.92630275289995e-36	5.92027114991379e-33	16390000	16490000	16460000	16590000	2789	0.392308	UI_548
chr1	16470000	16480000	chr1	16500000	16510000	191	1.71737684092451e-31	1.88502059754764e-28	16390000	16490000	16460000	16590000	2789	0.392308	UI_549
chr1	16400000	16410000	chr1	16560000	16570000	48	1.42417697179674e-21	6.68918106050669e-19	16390000	16490000	16460000	16590000	2789	0.392308	UI_550
chr1	16430000	16440000	chr1	16470000	16480000	80	3.02327247642545e-13	5.39977941888681e-11	16390000	16490000	16460000	16590000	2789	0.392308	UI_551
chr1	16430000	16440000	chr1	16500000	16510000	48	3.79408919905902e-13	6.69015012485219e-11	16390000	16490000	16460000	16590000	2789	0.392308	UI_552
chr1	32260000	32270000	chr1	32420000	32430000	138	7.15141990522319e-73	7.02347712861209e-69	32210000	32330000	32380000	32500000	2202	0.395833	UI_553
chr1	32290000	32300000	chr1	32420000	32430000	75	7.3977360506486e-27	5.62531528420103e-24	32210000	32330000	32380000	32500000	2202	0.395833	UI_554
chr1	32220000	32230000	chr1	32420000	32430000	64	1.08905600862949e-20	4.67363828341459e-18	32210000	32330000	32380000	32500000	2202	0.395833	UI_555
chr1	32320000	32330000	chr1	32400000	32410000	67	5.5134819948046e-14	1.09207419537259e-11	32210000	32330000	32380000	32500000	2202	0.395833	UI_556
chr1	32260000	32270000	chr1	32450000	32460000	33	9.02589426376495e-14	1.73493451959489e-11	32210000	32330000	32380000	32500000	2202	0.395833	UI_557
chr1	32260000	32270000	chr1	32480000	32490000	33	7.29736135613898e-12	1.06615123285694e-09	32210000	32330000	32380000	32500000	2202	0.395833	UI_558
chr1	32260000	32270000	chr1	32380000	32390000	35	3.17526716253324e-09	2.98460490484119e-07	32210000	32330000	32380000	32500000	2202	0.395833	UI_559
chr1	32290000	32300000	chr1	32450000	32460000	16	0.000162663	0.00498402	32210000	32330000	32380000	32500000	2202	0.395833	UI_560
chr1	21020000	21030000	chr1	21530000	21540000	38	8.70387872618907e-31	9.04044673630504e-28	20980000	21090000	21440000	21590000	958	0.351515	UI_561
chr1	21050000	21060000	chr1	21500000	21510000	34	8.91127009642757e-22	4.27043491440763e-19	20980000	21090000	21440000	21590000	958	0.351515	UI_562
chr1	21060000	21070000	chr1	21530000	21540000	30	3.52018873210535e-19	1.29333644666193e-16	20980000	21090000	21440000	21590000	958	0.351515	UI_563
chr1	21060000	21070000	chr1	21470000	21480000	34	8.5897044873286e-18	2.706787475579e-15	20980000	21090000	21440000	21590000	958	0.351515	UI_564
chr1	21020000	21030000	chr1	21500000	21510000	28	1.74033633314269e-17	5.29973418205926e-15	20980000	21090000	21440000	21590000	958	0.351515	UI_565
chr1	21020000	21030000	chr1	21580000	21590000	27	2.76045744493723e-15	6.47049337518282e-13	20980000	21090000	21440000	21590000	958	0.351515	UI_566
chr1	21020000	21030000	chr1	21470000	21480000	26	4.29605639286612e-14	8.62936652143913e-12	20980000	21090000	21440000	21590000	958	0.351515	UI_567
chr1	20980000	20990000	chr1	21510000	21520000	14	1.25430328997187e-06	6.88477774001283e-05	20980000	21090000	21440000	21590000	958	0.351515	UI_568
chr1	21060000	21070000	chr1	21440000	21450000	16	0.000181625	0.00547775	20980000	21090000	21440000	21590000	958	0.351515	UI_569
chr1	44230000	44240000	chr1	44390000	44400000	78	2.25545920642774e-50	7.90902431204202e-47	44170000	44270000	44370000	44460000	1386	0.533333	UI_570
chr1	44260000	44270000	chr1	44390000	44400000	54	9.43871198070097e-22	4.51449613577468e-19	44170000	44270000	44370000	44460000	1386	0.533333	UI_571
chr1	44170000	44180000	chr1	44390000	44400000	38	7.75712023263637e-16	1.94258066668367e-13	44170000	44270000	44370000	44460000	1386	0.533333	UI_572
chr1	44180000	44190000	chr1	44420000	44430000	31	6.11862721176175e-12	9.04538888586409e-10	44170000	44270000	44370000	44460000	1386	0.533333	UI_573
chr1	44200000	44210000	chr1	44390000	44400000	32	2.84745131664215e-10	3.22243895552814e-08	44170000	44270000	44370000	44460000	1386	0.533333	UI_574
chr1	44170000	44180000	chr1	44450000	44460000	19	1.91083890028799e-07	1.26050074648255e-05	44170000	44270000	44370000	44460000	1386	0.533333	UI_575
chr1	44230000	44240000	chr1	44440000	44450000	19	8.2335197189691e-07	4.71831784258681e-05	44170000	44270000	44370000	44460000	1386	0.533333	UI_576
chr1	95110000	95120000	chr1	95250000	95260000	96	2.29372287425785e-39	4.29177058441604e-36	95040000	95120000	95190000	95270000	1591	0.6875	UI_577
chr1	95040000	95050000	chr1	95250000	95260000	49	1.93633092241878e-21	8.98728128463633e-19	95040000	95120000	95190000	95270000	1591	0.6875	UI_578
chr1	95110000	95120000	chr1	95190000	95200000	86	3.17003404241962e-19	1.17027576989172e-16	95040000	95120000	95190000	95270000	1591	0.6875	UI_579
chr1	95070000	95080000	chr1	95260000	95270000	37	1.75407247762555e-15	4.2103613009564e-13	95040000	95120000	95190000	95270000	1591	0.6875	UI_580
chr1	95040000	95050000	chr1	95190000	95200000	38	2.51480096211858e-10	2.87288416441009e-08	95040000	95120000	95190000	95270000	1591	0.6875	UI_581
chr1	95070000	95080000	chr1	95230000	95240000	32	6.04328745028982e-10	6.46307671879317e-08	95040000	95120000	95190000	95270000	1591	0.6875	UI_582
chr1	95070000	95080000	chr1	95190000	95200000	31	6.81622863158951e-06	0.000312377	95040000	95120000	95190000	95270000	1591	0.6875	UI_583
chr1	95110000	95120000	chr1	95220000	95230000	34	6.72735684040389e-05	0.00232785	95040000	95120000	95190000	95270000	1591	0.6875	UI_584
chr1	95040000	95050000	chr1	95220000	95230000	19	0.000352591	0.00963711	95040000	95120000	95190000	95270000	1591	0.6875	UI_585
chr1	172870000	172880000	chr1	173160000	173170000	72	1.53430547278266e-47	4.58370417093629e-44	172850000	172950000	173130000	173240000	1336	0.436364	UI_586
chr1	172900000	172910000	chr1	173160000	173170000	70	4.72355952682206e-42	1.03820965046446e-38	172850000	172950000	173130000	173240000	1336	0.436364	UI_587
chr1	172930000	172940000	chr1	173170000	173180000	31	8.09134168896566e-15	1.78838767228623e-12	172850000	172950000	173130000	173240000	1336	0.436364	UI_588
chr1	172900000	172910000	chr1	173220000	173230000	32	9.18876912077133e-15	2.0160310627308e-12	172850000	172950000	173130000	173240000	1336	0.436364	UI_589
chr1	172870000	172880000	chr1	173230000	173240000	28	1.79750452880396e-14	3.79498205739219e-12	172850000	172950000	173130000	173240000	1336	0.436364	UI_590
chr1	172900000	172910000	chr1	173190000	173200000	25	1.98992438907733e-10	2.31196485720055e-08	172850000	172950000	173130000	173240000	1336	0.436364	UI_591
chr1	172870000	172880000	chr1	173190000	173200000	23	8.25842606021967e-10	8.62686427208663e-08	172850000	172950000	173130000	173240000	1336	0.436364	UI_592
chr1	172880000	172890000	chr1	173130000	173140000	23	1.0865869960433e-05	0.000471917	172850000	172950000	173130000	173240000	1336	0.436364	UI_593
chr1	214550000	214560000	chr1	214720000	214730000	52	1.14100281301524e-24	7.17625482956887e-22	214500000	214580000	214690000	214810000	988	0.479167	UI_594
chr1	214500000	214510000	chr1	214720000	214730000	33	7.60166932067079e-16	1.90552573176996e-13	214500000	214580000	214690000	214810000	988	0.479167	UI_595
chr1	214510000	214520000	chr1	214770000	214780000	32	5.12795840477691e-15	1.16124409045152e-12	214500000	214580000	214690000	214810000	988	0.479167	UI_596
chr1	214550000	214560000	chr1	214750000	214760000	26	1.49431309104763e-12	2.41868358590827e-10	214500000	214580000	214690000	214810000	988	0.479167	UI_597
chr1	214500000	214510000	chr1	214800000	214810000	14	2.48251655419464e-07	1.59809688998856e-05	214500000	214580000	214690000	214810000	988	0.479167	UI_598
chr1	214550000	214560000	chr1	214690000	214700000	24	2.3418419420573e-06	0.000120468	214500000	214580000	214690000	214810000	988	0.479167	UI_599
chr1	218510000	218520000	chr1	218650000	218660000	105	6.4001428504827e-47	1.84851819093931e-43	218500000	218560000	218620000	218770000	2250	0.522222	UI_600
chr1	218540000	218550000	chr1	218670000	218680000	83	6.41347650563849e-31	6.72284958794106e-28	218500000	218560000	218620000	218770000	2250	0.522222	UI_601
chr1	218550000	218560000	chr1	218640000	218650000	90	7.98572606867385e-26	5.55214937589226e-23	218500000	218560000	218620000	218770000	2250	0.522222	UI_602
chr1	218510000	218520000	chr1	218690000	218700000	41	6.2483712862065e-20	2.47820980589779e-17	218500000	218560000	218620000	218770000	2250	0.522222	UI_603
chr1	218520000	218530000	chr1	218720000	218730000	34	6.60990016952442e-17	1.88431962086235e-14	218500000	218560000	218620000	218770000	2250	0.522222	UI_604
chr1	218520000	218530000	chr1	218620000	218630000	34	2.33588436619504e-07	1.51200364757802e-05	218500000	218560000	218620000	218770000	2250	0.522222	UI_605
chr1	218520000	218530000	chr1	218750000	218760000	21	5.28088248229427e-06	0.000248951	218500000	218560000	218620000	218770000	2250	0.522222	UI_606
chr1	218550000	218560000	chr1	218710000	218720000	24	6.15787006309384e-06	0.000285437	218500000	218560000	218620000	218770000	2250	0.522222	UI_607
chr1	33170000	33180000	chr1	33220000	33230000	80	3.67901034016693e-19	1.34835338146336e-16	33140000	33210000	33160000	33270000	2498	0.558442	UI_608
chr1	33170000	33180000	chr1	33190000	33200000	144	3.53126999400677e-15	8.16365993652409e-13	33140000	33210000	33160000	33270000	2498	0.558442	UI_609
chr1	33200000	33210000	chr1	33220000	33230000	117	1.28813659670138e-14	2.77412155394786e-12	33140000	33210000	33160000	33270000	2498	0.558442	UI_610
chr1	33150000	33160000	chr1	33260000	33270000	42	2.1079928441886e-12	3.33560379395861e-10	33140000	33210000	33160000	33270000	2498	0.558442	UI_611
chr1	33140000	33150000	chr1	33220000	33230000	46	5.94281330707579e-11	7.53609325148974e-09	33140000	33210000	33160000	33270000	2498	0.558442	UI_612
chr1	33140000	33150000	chr1	33190000	33200000	64	6.04078225916233e-09	5.38968276797665e-07	33140000	33210000	33160000	33270000	2498	0.558442	UI_613
chr1	33180000	33190000	chr1	33250000	33260000	31	7.89809728766235e-05	0.00267479	33140000	33210000	33160000	33270000	2498	0.558442	UI_614
chr1	33140000	33150000	chr1	33160000	33170000	85	0.000112762	0.00363894	33140000	33210000	33160000	33270000	2498	0.558442	UI_615
chr1	231490000	231500000	chr1	231720000	231730000	50	4.04989706865051e-37	6.54097640161779e-34	231450000	231540000	231640000	231780000	1035	0.404762	UI_616
chr1	231490000	231500000	chr1	231660000	231670000	61	3.00267344975305e-32	3.45796371324887e-29	231450000	231540000	231640000	231780000	1035	0.404762	UI_617
chr1	231520000	231530000	chr1	231720000	231730000	32	3.20318625790101e-14	6.54327558421752e-12	231450000	231540000	231640000	231780000	1035	0.404762	UI_618
chr1	231530000	231540000	chr1	231760000	231770000	29	1.50701414485033e-10	1.78776514991871e-08	231450000	231540000	231640000	231780000	1035	0.404762	UI_619
chr1	231470000	231480000	chr1	231690000	231700000	22	3.74406850465569e-10	4.15207654725901e-08	231450000	231540000	231640000	231780000	1035	0.404762	UI_620
chr1	231470000	231480000	chr1	231760000	231770000	22	1.84023593037719e-09	1.80746759261941e-07	231450000	231540000	231640000	231780000	1035	0.404762	UI_621
chr1	231450000	231460000	chr1	231720000	231730000	15	1.47695132560191e-06	7.96912917239628e-05	231450000	231540000	231640000	231780000	1035	0.404762	UI_622
chr1	33790000	33800000	chr1	33920000	33930000	76	8.61699679358052e-30	8.30123066391571e-27	33760000	33880000	33880000	33940000	2101	0.583333	UI_623
chr1	33850000	33860000	chr1	33890000	33900000	118	3.21784684074159e-24	1.94196058184109e-21	33760000	33880000	33880000	33940000	2101	0.583333	UI_624
chr1	33760000	33770000	chr1	33930000	33940000	41	1.31496684848139e-21	6.19878200758391e-19	33760000	33880000	33880000	33940000	2101	0.583333	UI_625
chr1	33800000	33810000	chr1	33890000	33900000	81	9.83622211319854e-18	3.08025904988908e-15	33760000	33880000	33880000	33940000	2101	0.583333	UI_626
chr1	33850000	33860000	chr1	33920000	33930000	74	1.13092311246254e-17	3.5166207898131e-15	33760000	33880000	33880000	33940000	2101	0.583333	UI_627
chr1	33820000	33830000	chr1	33920000	33930000	33	1.85208033819908e-10	2.16288676296475e-08	33760000	33880000	33880000	33940000	2101	0.583333	UI_628
chr1	33760000	33770000	chr1	33900000	33910000	20	7.60980478850795e-06	0.000344429	33760000	33880000	33880000	33940000	2101	0.583333	UI_629
chr1	206900000	206910000	chr1	207080000	207090000	70	2.0155234614063e-47	5.97957561436219e-44	206830000	206950000	207050000	207110000	1752	0.583333	UI_630
chr1	206850000	206860000	chr1	207060000	207070000	59	3.60945493041298e-19	1.32429720076029e-16	206830000	206950000	207050000	207110000	1752	0.583333	UI_631
chr1	206930000	206940000	chr1	207060000	207070000	49	3.32409260954229e-14	6.77795740924723e-12	206830000	206950000	207050000	207110000	1752	0.583333	UI_632
chr1	206900000	206910000	chr1	207050000	207060000	28	4.37363905742144e-05	0.00160114	206830000	206950000	207050000	207110000	1752	0.583333	UI_633
chr1	94710000	94720000	chr1	94790000	94800000	116	6.29666798862484e-47	1.82059873385338e-43	94620000	94780000	94750000	94810000	2437	0.447917	UI_634
chr1	94670000	94680000	chr1	94790000	94800000	81	6.98251445159303e-36	1.03519812936336e-32	94620000	94780000	94750000	94810000	2437	0.447917	UI_635
chr1	94640000	94650000	chr1	94790000	94800000	56	2.82801765409051e-20	1.16197215634016e-17	94620000	94780000	94750000	94810000	2437	0.447917	UI_636
chr1	94760000	94770000	chr1	94790000	94800000	93	7.36251706575868e-10	7.75621153543773e-08	94620000	94780000	94750000	94810000	2437	0.447917	UI_637
chr1	94730000	94740000	chr1	94760000	94770000	65	2.30685483138825e-09	2.22512521698607e-07	94620000	94780000	94750000	94810000	2437	0.447917	UI_638
chr1	94700000	94710000	chr1	94760000	94770000	40	4.10292197804159e-08	3.11103475039064e-06	94620000	94780000	94750000	94810000	2437	0.447917	UI_639
chr1	172110000	172120000	chr1	172350000	172360000	59	4.62966417904623e-36	6.94655649510918e-33	172090000	172160000	172270000	172400000	1071	0.450549	UI_640
chr1	172110000	172120000	chr1	172290000	172300000	70	9.47844209924266e-36	1.39416004341842e-32	172090000	172160000	172270000	172400000	1071	0.450549	UI_641
chr1	172110000	172120000	chr1	172320000	172330000	53	6.42423072347389e-28	5.33863656217853e-25	172090000	172160000	172270000	172400000	1071	0.450549	UI_642
chr1	172110000	172120000	chr1	172380000	172390000	28	5.37757981378112e-15	1.21463413765532e-12	172090000	172160000	172270000	172400000	1071	0.450549	UI_643
chr1	172140000	172150000	chr1	172350000	172360000	26	2.38198459535012e-11	3.21480660592086e-09	172090000	172160000	172270000	172400000	1071	0.450549	UI_644
chr1	172140000	172150000	chr1	172310000	172320000	27	1.40095145615107e-10	1.67065280948934e-08	172090000	172160000	172270000	172400000	1071	0.450549	UI_645
chr1	172150000	172160000	chr1	172380000	172390000	10	0.000364313	0.00990625	172090000	172160000	172270000	172400000	1071	0.450549	UI_646
chr1	200320000	200330000	chr1	200450000	200460000	73	1.17974219455929e-29	1.12375718618357e-26	200300000	200360000	200370000	200470000	1890	0.683333	UI_647
chr1	200320000	200330000	chr1	200380000	200390000	93	7.26063152978711e-17	2.06038109367975e-14	200300000	200360000	200370000	200470000	1890	0.683333	UI_648
chr1	200300000	200310000	chr1	200420000	200430000	25	1.78438215409441e-06	9.44298567628412e-05	200300000	200360000	200370000	200470000	1890	0.683333	UI_649
chr1	200340000	200350000	chr1	200410000	200420000	41	2.57709071591466e-06	0.00013127	200300000	200360000	200370000	200470000	1890	0.683333	UI_650
chr1	200350000	200360000	chr1	200370000	200380000	74	1.29158598249505e-05	0.000549638	200300000	200360000	200370000	200470000	1890	0.683333	UI_651
chr1	200350000	200360000	chr1	200450000	200460000	27	2.75408151636203e-05	0.00106878	200300000	200360000	200370000	200470000	1890	0.683333	UI_652
chr1	59270000	59280000	chr1	59490000	59500000	43	4.4154715554592e-21	1.97301975127402e-18	59270000	59330000	59470000	59630000	1086	0.458333	UI_653
chr1	59280000	59290000	chr1	59610000	59620000	35	2.02439327818729e-16	5.44589237262793e-14	59270000	59330000	59470000	59630000	1086	0.458333	UI_654
chr1	59280000	59290000	chr1	59550000	59560000	31	3.03095630144606e-14	6.2113853433577e-12	59270000	59330000	59470000	59630000	1086	0.458333	UI_655
chr1	59280000	59290000	chr1	59520000	59530000	36	3.87130671929765e-12	5.8925910805727e-10	59270000	59330000	59470000	59630000	1086	0.458333	UI_656
chr1	59310000	59320000	chr1	59500000	59510000	29	2.86103603213994e-10	3.23657977004233e-08	59270000	59330000	59470000	59630000	1086	0.458333	UI_657
chr1	59300000	59310000	chr1	59470000	59480000	29	5.46040942095544e-10	5.88478500866986e-08	59270000	59330000	59470000	59630000	1086	0.458333	UI_658
chr1	59280000	59290000	chr1	59580000	59590000	18	4.47657753724575e-07	2.72301973156301e-05	59270000	59330000	59470000	59630000	1086	0.458333	UI_659
chr1	110330000	110340000	chr1	110450000	110460000	81	7.92573360197162e-38	1.34061496282249e-34	110300000	110380000	110400000	110480000	1632	0.625	UI_660
chr1	110330000	110340000	chr1	110420000	110430000	98	1.53046799117656e-35	2.22097943095356e-32	110300000	110380000	110400000	110480000	1632	0.625	UI_661
chr1	110360000	110370000	chr1	110410000	110420000	74	1.15875299277448e-13	2.19406222404614e-11	110300000	110380000	110400000	110480000	1632	0.625	UI_662
chr1	110370000	110380000	chr1	110470000	110480000	23	2.18695680783662e-05	0.000873177	110300000	110380000	110400000	110480000	1632	0.625	UI_663
chr1	110300000	110310000	chr1	110410000	110420000	40	2.89017832213853e-05	0.00111486	110300000	110380000	110400000	110480000	1632	0.625	UI_664
chr1	110300000	110310000	chr1	110450000	110460000	22	0.000130642	0.00413049	110300000	110380000	110400000	110480000	1632	0.625	UI_665
chr1	153760000	153770000	chr1	153950000	153960000	48	2.14466086263179e-25	1.43763815778849e-22	153720000	153820000	153890000	153970000	985	0.55	UI_666
chr1	153770000	153780000	chr1	153890000	153900000	24	9.47727884184064e-09	8.15134237552746e-07	153720000	153820000	153890000	153970000	985	0.55	UI_667
chr1	153760000	153770000	chr1	153920000	153930000	32	1.46160587470305e-07	9.88355445088902e-06	153720000	153820000	153890000	153970000	985	0.55	UI_668
chr1	153790000	153800000	chr1	153950000	153960000	30	4.27578177073047e-07	2.61261805985208e-05	153720000	153820000	153890000	153970000	985	0.55	UI_669
chr1	153720000	153730000	chr1	153950000	153960000	17	3.00890623849961e-06	0.000150808	153720000	153820000	153890000	153970000	985	0.55	UI_670
chr1	153730000	153740000	chr1	153910000	153920000	14	1.7436484052783e-05	0.000715977	153720000	153820000	153890000	153970000	985	0.55	UI_671
chr1	157970000	157980000	chr1	158000000	158010000	162	1.45210421426209e-32	1.71286029926745e-29	157930000	157990000	157980000	158100000	2346	0.555556	UI_672
chr1	157960000	157970000	chr1	158050000	158060000	49	3.06742640150632e-19	1.13419716374939e-16	157930000	157990000	157980000	158100000	2346	0.555556	UI_673
chr1	157930000	157940000	chr1	158080000	158090000	26	1.92675908395824e-15	4.60183559747563e-13	157930000	157990000	157980000	158100000	2346	0.555556	UI_674
chr1	157970000	157980000	chr1	158080000	158090000	36	2.26702478436804e-10	2.60992680269958e-08	157930000	157990000	157980000	158100000	2346	0.555556	UI_675
chr1	157930000	157940000	chr1	158050000	158060000	18	1.50924543508179e-06	8.12607708337423e-05	157930000	157990000	157980000	158100000	2346	0.555556	UI_676
chr1	29560000	29570000	chr1	31180000	31190000	20	7.99179725803096e-18	2.52693706618683e-15	29490000	29610000	31140000	31200000	446	0.555556	UI_677
chr1	29560000	29570000	chr1	31140000	31150000	20	8.09149012633128e-17	2.28313314260803e-14	29490000	29610000	31140000	31200000	446	0.555556	UI_678
chr1	29530000	29540000	chr1	31140000	31150000	14	1.86471242020004e-10	2.17694407551147e-08	29490000	29610000	31140000	31200000	446	0.555556	UI_679
chr1	29500000	29510000	chr1	31190000	31200000	13	2.83089510169511e-09	2.68526589564591e-07	29490000	29610000	31140000	31200000	446	0.555556	UI_680
chr1	29530000	29540000	chr1	31190000	31200000	11	9.33209415733019e-08	6.57850052615964e-06	29490000	29610000	31140000	31200000	446	0.555556	UI_681
chr1	29590000	29600000	chr1	31190000	31200000	11	1.42294799319204e-07	9.64507439411591e-06	29490000	29610000	31140000	31200000	446	0.555556	UI_682
chr1	29590000	29600000	chr1	31160000	31170000	10	1.07627513281087e-06	6.00394718668868e-05	29490000	29610000	31140000	31200000	446	0.555556	UI_683
chr1	59610000	59620000	chr1	60150000	60160000	34	1.89930128007626e-24	1.17051946093661e-21	59540000	59650000	60130000	60230000	588	0.4	UI_684
chr1	59600000	59610000	chr1	60190000	60200000	18	5.58068510754103e-11	7.10856880365273e-09	59540000	59650000	60130000	60230000	588	0.4	UI_685
chr1	59610000	59620000	chr1	60220000	60230000	18	8.94154241643978e-11	1.10168001945878e-08	59540000	59650000	60130000	60230000	588	0.4	UI_686
chr1	59540000	59550000	chr1	60160000	60170000	15	3.07924048783715e-09	2.90140754726865e-07	59540000	59650000	60130000	60230000	588	0.4	UI_687
chr1	59630000	59640000	chr1	60190000	60200000	14	6.44700596266027e-08	4.69558427008779e-06	59540000	59650000	60130000	60230000	588	0.4	UI_688
chr1	59640000	59650000	chr1	60150000	60160000	13	1.08677359829539e-06	6.05673119070174e-05	59540000	59650000	60130000	60230000	588	0.4	UI_689
chr1	59570000	59580000	chr1	60150000	60160000	14	2.03540024394968e-06	0.000106236	59540000	59650000	60130000	60230000	588	0.4	UI_690
chr1	112050000	112060000	chr1	112290000	112300000	50	1.04419866117166e-31	1.16235265231064e-28	111970000	112060000	112250000	112340000	891	0.506173	UI_691
chr1	112020000	112030000	chr1	112290000	112300000	41	1.2567117227063e-26	9.36702768747657e-24	111970000	112060000	112250000	112340000	891	0.506173	UI_692
chr1	112020000	112030000	chr1	112250000	112260000	33	3.55942195743473e-17	1.04702082167665e-14	111970000	112060000	112250000	112340000	891	0.506173	UI_693
chr1	112050000	112060000	chr1	112250000	112260000	30	4.70909135066607e-12	7.08352090112459e-10	111970000	112060000	112250000	112340000	891	0.506173	UI_694
chr1	112020000	112030000	chr1	112320000	112330000	15	4.22034455393679e-07	2.58197554432568e-05	111970000	112060000	112250000	112340000	891	0.506173	UI_695
chr1	112050000	112060000	chr1	112320000	112330000	16	8.19354835026837e-07	4.69777556969233e-05	111970000	112060000	112250000	112340000	891	0.506173	UI_696
chr1	111990000	112000000	chr1	112290000	112300000	14	4.08212596022619e-06	0.000197963	111970000	112060000	112250000	112340000	891	0.506173	UI_697
chr1	156470000	156480000	chr1	156540000	156550000	155	4.29029945373146e-45	1.1118364572126e-41	156440000	156490000	156460000	156610000	3224	0.52	UI_698
chr1	156440000	156450000	chr1	156470000	156480000	250	4.13842915412049e-39	7.6089413122113e-36	156440000	156490000	156460000	156610000	3224	0.52	UI_699
chr1	156470000	156480000	chr1	156510000	156520000	168	1.66991017964793e-34	2.25476285770553e-31	156440000	156490000	156460000	156610000	3224	0.52	UI_700
chr1	156470000	156480000	chr1	156570000	156580000	101	3.44728767572841e-29	3.16964706201819e-26	156440000	156490000	156460000	156610000	3224	0.52	UI_701
chr1	156440000	156450000	chr1	156540000	156550000	52	1.87575432171122e-16	5.06514381307466e-14	156440000	156490000	156460000	156610000	3224	0.52	UI_702
chr1	156440000	156450000	chr1	156570000	156580000	41	4.42529772505898e-14	8.87513507364133e-12	156440000	156490000	156460000	156610000	3224	0.52	UI_703
chr1	156440000	156450000	chr1	156510000	156520000	51	1.09608872954772e-12	1.80941802336457e-10	156440000	156490000	156460000	156610000	3224	0.52	UI_704
chr1	156470000	156480000	chr1	156600000	156610000	55	9.60082748048148e-06	0.000423056	156440000	156490000	156460000	156610000	3224	0.52	UI_705
chr1	163840000	163850000	chr1	164750000	164760000	25	2.35269994316451e-19	8.8023964725861e-17	163780000	163890000	164710000	164770000	495	0.590909	UI_706
chr1	163790000	163800000	chr1	164750000	164760000	22	7.89795332134388e-17	2.23164432167562e-14	163780000	163890000	164710000	164770000	495	0.590909	UI_707
chr1	163790000	163800000	chr1	164710000	164720000	21	1.25764591953241e-15	3.07459527852641e-13	163780000	163890000	164710000	164770000	495	0.590909	UI_708
chr1	163840000	163850000	chr1	164710000	164720000	19	5.7976457306516e-13	9.96093466415816e-11	163780000	163890000	164710000	164770000	495	0.590909	UI_709
chr1	163870000	163880000	chr1	164710000	164720000	10	6.06935994192181e-05	0.00212897	163780000	163890000	164710000	164770000	495	0.590909	UI_710
chr1	2160000	2170000	chr1	2250000	2260000	91	1.43414885422981e-29	1.35786726890853e-26	2120000	2190000	2200000	2270000	1586	0.755102	UI_711
chr1	2120000	2130000	chr1	2250000	2260000	73	1.95978820432754e-26	1.43799889742413e-23	2120000	2190000	2200000	2270000	1586	0.755102	UI_712
chr1	2160000	2170000	chr1	2210000	2220000	68	4.26441919192137e-15	9.75754069952078e-13	2120000	2190000	2200000	2270000	1586	0.755102	UI_713
chr1	2120000	2130000	chr1	2220000	2230000	44	5.93202435566601e-14	1.16972350985477e-11	2120000	2190000	2200000	2270000	1586	0.755102	UI_714
chr1	201680000	201690000	chr1	201750000	201760000	192	7.14722088171373e-57	3.50806593170812e-53	201660000	201740000	201700000	201830000	4375	0.375	UI_715
chr1	201680000	201690000	chr1	201710000	201720000	295	8.88009606934314e-39	1.59835332948753e-35	201660000	201740000	201700000	201830000	4375	0.375	UI_716
chr1	201710000	201720000	chr1	201750000	201760000	159	2.37256434256963e-29	2.20863292931057e-26	201660000	201740000	201700000	201830000	4375	0.375	UI_717
chr1	201680000	201690000	chr1	201780000	201790000	80	1.24964313760582e-18	4.32571068236848e-16	201660000	201740000	201700000	201830000	4375	0.375	UI_718
chr1	201680000	201690000	chr1	201820000	201830000	35	2.23383923587964e-05	0.000889541	201660000	201740000	201700000	201830000	4375	0.375	UI_719
chr1	2120000	2130000	chr1	2310000	2320000	60	5.61248796903799e-40	1.08822560146468e-36	2110000	2190000	2280000	2350000	1192	0.642857	UI_720
chr1	2160000	2170000	chr1	2320000	2330000	65	1.79600897620084e-30	1.82401818618592e-27	2110000	2190000	2280000	2350000	1192	0.642857	UI_721
chr1	2120000	2130000	chr1	2280000	2290000	41	6.50500742901417e-18	2.07746344514869e-15	2110000	2190000	2280000	2350000	1192	0.642857	UI_722
chr1	2160000	2170000	chr1	2290000	2300000	29	5.06702367510079e-09	4.58644185203387e-07	2110000	2190000	2280000	2350000	1192	0.642857	UI_723
chr1	2120000	2130000	chr1	2340000	2350000	24	1.79600267808224e-08	1.464267777176e-06	2110000	2190000	2280000	2350000	1192	0.642857	UI_724
chr1	27420000	27430000	chr1	27620000	27630000	49	1.15140073820541e-25	7.89487686628663e-23	27420000	27500000	27560000	27670000	1115	0.431818	UI_725
chr1	27440000	27450000	chr1	27560000	27570000	52	4.45753304650827e-15	1.01750293738187e-12	27420000	27500000	27560000	27670000	1115	0.431818	UI_726
chr1	27440000	27450000	chr1	27590000	27600000	43	3.18770366660012e-09	2.9954785396757e-07	27420000	27500000	27560000	27670000	1115	0.431818	UI_727
chr1	27490000	27500000	chr1	27560000	27570000	28	2.33071555459749e-06	0.000119954	27420000	27500000	27560000	27670000	1115	0.431818	UI_728
chr1	27440000	27450000	chr1	27650000	27660000	25	2.67699110642816e-06	0.000135821	27420000	27500000	27560000	27670000	1115	0.431818	UI_729
chr1	183000000	183010000	chr1	183060000	183070000	151	4.01385071006298e-36	6.04631320090784e-33	182990000	183050000	183010000	183120000	2957	0.545455	UI_730
chr1	183040000	183050000	chr1	183060000	183070000	153	9.53159830043805e-14	1.82613362098905e-11	182990000	183050000	183010000	183120000	2957	0.545455	UI_731
chr1	183000000	183010000	chr1	183100000	183110000	59	1.23905914159432e-12	2.02955059920722e-10	182990000	183050000	183010000	183120000	2957	0.545455	UI_732
chr1	183010000	183020000	chr1	183030000	183040000	119	2.11442390265748e-10	2.44630442005073e-08	182990000	183050000	183010000	183120000	2957	0.545455	UI_733
chr1	234740000	234750000	chr1	234850000	234860000	325	5.6295268683519e-145	5.68007152223066e-140	234720000	234800000	234810000	234920000	2822	0.409091	UI_734
chr1	234740000	234750000	chr1	234900000	234910000	100	4.94072477923271e-35	6.91738464701609e-32	234720000	234800000	234810000	234920000	2822	0.409091	UI_735
chr1	234790000	234800000	chr1	234850000	234860000	130	5.8868460837652e-18	1.8894673610046e-15	234720000	234800000	234810000	234920000	2822	0.409091	UI_736
chr1	234740000	234750000	chr1	234810000	234820000	79	8.55981537393763e-10	8.91826811807811e-08	234720000	234800000	234810000	234920000	2822	0.409091	UI_737
chr1	234980000	234990000	chr1	235110000	235120000	106	1.24192584708709e-24	7.78673381747107e-22	234970000	235070000	235090000	235150000	3133	0.583333	UI_738
chr1	235050000	235060000	chr1	235110000	235120000	192	9.99739111053124e-24	5.75509001982898e-21	234970000	235070000	235090000	235150000	3133	0.583333	UI_739
chr1	235020000	235030000	chr1	235100000	235110000	95	1.48174545089948e-11	2.06730184163264e-09	234970000	235070000	235090000	235150000	3133	0.583333	UI_740
chr1	235050000	235060000	chr1	235140000	235150000	52	4.63735947095289e-06	0.000221744	234970000	235070000	235090000	235150000	3133	0.583333	UI_741
chr1	23880000	23890000	chr1	23960000	23970000	289	2.92972350152025e-117	1.34480243610306e-112	23850000	23920000	23900000	24000000	5929	0.485714	UI_742
chr1	23880000	23890000	chr1	23910000	23920000	558	7.88797736772402e-98	1.95738456333911e-93	23850000	23920000	23900000	24000000	5929	0.485714	UI_743
chr1	23910000	23920000	chr1	23940000	23950000	253	9.14164997743815e-54	3.849272396555e-50	23850000	23920000	23900000	24000000	5929	0.485714	UI_744
chr1	23910000	23920000	chr1	23970000	23980000	87	1.81833800075037e-13	3.35075340239516e-11	23850000	23920000	23900000	24000000	5929	0.485714	UI_745
chr1	23850000	23860000	chr1	23960000	23970000	42	1.27194736193063e-10	1.52752684357146e-08	23850000	23920000	23900000	24000000	5929	0.485714	UI_746
chr1	23880000	23890000	chr1	23990000	24000000	58	2.14523815827233e-05	0.000858636	23850000	23920000	23900000	24000000	5929	0.485714	UI_747
chr1	59250000	59260000	chr1	59480000	59490000	58	2.89078410492286e-29	2.6738245452751e-26	59200000	59260000	59470000	59560000	916	0.62963	UI_748
chr1	59250000	59260000	chr1	59520000	59530000	52	1.3639885929247e-27	1.10215265997035e-24	59200000	59260000	59470000	59560000	916	0.62963	UI_749
chr1	59220000	59230000	chr1	59480000	59490000	32	4.05931413863067e-11	5.28478812366093e-09	59200000	59260000	59470000	59560000	916	0.62963	UI_750
chr1	59250000	59260000	chr1	59550000	59560000	23	5.72612462919305e-10	6.14717923058799e-08	59200000	59260000	59470000	59560000	916	0.62963	UI_751
chr1	59220000	59230000	chr1	59510000	59520000	26	5.83313691976896e-10	6.25433865567366e-08	59200000	59260000	59470000	59560000	916	0.62963	UI_752
chr1	59220000	59230000	chr1	59540000	59550000	22	1.30157456616273e-09	1.31333508084757e-07	59200000	59260000	59470000	59560000	916	0.62963	UI_753
chr1	198230000	198240000	chr1	198630000	198640000	21	1.24853205651113e-11	1.76127269862565e-09	198180000	198330000	198620000	198670000	472	0.453333	UI_754
chr1	198260000	198270000	chr1	198640000	198650000	17	1.07785045167207e-08	9.16366264510093e-07	198180000	198330000	198620000	198670000	472	0.453333	UI_755
chr1	198180000	198190000	chr1	198630000	198640000	16	2.17473526749259e-08	1.74357886792999e-06	198180000	198330000	198620000	198670000	472	0.453333	UI_756
chr1	198300000	198310000	chr1	198630000	198640000	14	2.77627633012283e-06	0.000140359	198180000	198330000	198620000	198670000	472	0.453333	UI_757
chr1	198190000	198200000	chr1	198660000	198670000	8	0.000297033	0.00833246	198180000	198330000	198620000	198670000	472	0.453333	UI_758
chr1	1750000	1760000	chr1	1810000	1820000	68	1.03152074213833e-19	3.99996075513474e-17	1690000	1760000	1770000	1850000	1254	0.589286	UI_759
chr1	1710000	1720000	chr1	1830000	1840000	37	1.13342517619051e-16	3.14168127730668e-14	1690000	1760000	1770000	1850000	1254	0.589286	UI_760
chr1	1750000	1760000	chr1	1770000	1780000	117	3.27249711723292e-14	6.67848179409435e-12	1690000	1760000	1770000	1850000	1254	0.589286	UI_761
chr1	1710000	1720000	chr1	1770000	1780000	53	4.21457650788347e-10	4.63121552028903e-08	1690000	1760000	1770000	1850000	1254	0.589286	UI_762
chr1	1710000	1720000	chr1	1800000	1810000	27	1.69905983832632e-06	9.03675384743528e-05	1690000	1760000	1770000	1850000	1254	0.589286	UI_763
chr1	1750000	1760000	chr1	1840000	1850000	21	0.000288946	0.00813897	1690000	1760000	1770000	1850000	1254	0.589286	UI_764
chr1	17450000	17460000	chr1	17560000	17570000	95	1.70870897021836e-61	1.03248227878126e-57	17430000	17540000	17510000	17620000	1558	0.31405	UI_765
chr1	17490000	17500000	chr1	17550000	17560000	96	2.30815020661905e-28	1.9904905226275e-25	17430000	17540000	17510000	17620000	1558	0.31405	UI_766
chr1	17520000	17530000	chr1	17550000	17560000	96	1.35882566061955e-18	4.68469929673771e-16	17430000	17540000	17510000	17620000	1558	0.31405	UI_767
chr1	17490000	17500000	chr1	17520000	17530000	86	2.75584595045337e-16	7.29434168475816e-14	17430000	17540000	17510000	17620000	1558	0.31405	UI_768
chr1	17440000	17450000	chr1	17590000	17600000	21	1.56517802702183e-10	1.85103645818755e-08	17430000	17540000	17510000	17620000	1558	0.31405	UI_769
chr1	25890000	25900000	chr1	26120000	26130000	55	5.60356072136257e-33	6.83130579361869e-30	25820000	25970000	26050000	26150000	779	0.253333	UI_770
chr1	25940000	25950000	chr1	26120000	26130000	35	1.533037953812e-19	5.84677267002366e-17	25820000	25970000	26050000	26150000	779	0.253333	UI_771
chr1	25860000	25870000	chr1	26120000	26130000	23	1.34764199531825e-12	2.19603902523911e-10	25820000	25970000	26050000	26150000	779	0.253333	UI_772
chr1	25890000	25900000	chr1	26060000	26070000	33	1.82324862810636e-12	2.91300662917518e-10	25820000	25970000	26050000	26150000	779	0.253333	UI_773
chr1	25830000	25840000	chr1	26140000	26150000	13	2.06284884061179e-06	0.00010753	25820000	25970000	26050000	26150000	779	0.253333	UI_774
chr1	25890000	25900000	chr1	26090000	26100000	13	0.000290477	0.00817563	25820000	25970000	26050000	26150000	779	0.253333	UI_775
chr1	31270000	31280000	chr1	31380000	31390000	75	4.35822327194474e-29	3.97441571519882e-26	31190000	31300000	31320000	31410000	1257	0.333333	UI_776
chr1	31230000	31240000	chr1	31380000	31390000	41	1.16077558000783e-17	3.60473126642959e-15	31190000	31300000	31320000	31410000	1257	0.333333	UI_777
chr1	31280000	31290000	chr1	31330000	31340000	63	1.66752864381352e-15	4.01533358711102e-13	31190000	31300000	31320000	31410000	1257	0.333333	UI_778
chr1	31190000	31200000	chr1	31380000	31390000	31	3.27134680688947e-12	5.03093202549913e-10	31190000	31300000	31320000	31410000	1257	0.333333	UI_779
chr1	144530000	144540000	chr1	145030000	145040000	33	3.72708754266762e-21	1.67775757935467e-18	144520000	144550000	144980000	145120000	575	0.785714	UI_780
chr1	144530000	144540000	chr1	145110000	145120000	30	1.91772140398108e-18	6.49390839148276e-16	144520000	144550000	144980000	145120000	575	0.785714	UI_781
chr1	144520000	144530000	chr1	145000000	145010000	27	2.6333536958438e-16	6.98758763307822e-14	144520000	144550000	144980000	145120000	575	0.785714	UI_782
chr1	144530000	144540000	chr1	145070000	145080000	24	4.67950736892867e-14	9.35671562114819e-12	144520000	144550000	144980000	145120000	575	0.785714	UI_783
chr1	3460000	3470000	chr1	3530000	3540000	96	3.05929488677716e-29	2.82358344949968e-26	3360000	3480000	3510000	3550000	982	0.666667	UI_784
chr1	3390000	3400000	chr1	3540000	3550000	24	3.78725959229331e-11	4.95351564102516e-09	3360000	3480000	3510000	3550000	982	0.666667	UI_785
chr1	3430000	3440000	chr1	3530000	3540000	32	2.07696923595738e-10	2.40598999385576e-08	3360000	3480000	3510000	3550000	982	0.666667	UI_786
chr1	3360000	3370000	chr1	3530000	3540000	13	1.97844982805032e-05	0.000800101	3360000	3480000	3510000	3550000	982	0.666667	UI_787
chr1	36810000	36820000	chr1	36840000	36850000	144	1.56403825789976e-18	5.35199429941394e-16	36750000	36820000	36830000	36900000	1786	0.653061	UI_788
chr1	36780000	36790000	chr1	36850000	36860000	88	3.02068165760045e-17	8.95046679187752e-15	36750000	36820000	36830000	36900000	1786	0.653061	UI_789
chr1	36810000	36820000	chr1	36880000	36890000	63	1.52079772387274e-13	2.83459563863081e-11	36750000	36820000	36830000	36900000	1786	0.653061	UI_790
chr1	36780000	36790000	chr1	36880000	36890000	45	7.83957471097607e-12	1.13981049660471e-09	36750000	36820000	36830000	36900000	1786	0.653061	UI_791
chr1	36750000	36760000	chr1	36890000	36900000	23	8.73701767196595e-06	0.000389293	36750000	36820000	36830000	36900000	1786	0.653061	UI_792
chr1	115710000	115720000	chr1	116080000	116090000	45	1.41423001535153e-27	1.14136985072044e-24	115700000	115780000	116030000	116110000	724	0.515625	UI_793
chr1	115710000	115720000	chr1	116030000	116040000	38	1.43045641459857e-19	5.47115023160426e-17	115700000	115780000	116030000	116110000	724	0.515625	UI_794
chr1	115740000	115750000	chr1	116080000	116090000	26	8.53256142899163e-10	8.8928182971605e-08	115700000	115780000	116030000	116110000	724	0.515625	UI_795
chr1	115770000	115780000	chr1	116090000	116100000	18	3.99469425296878e-08	3.0362685572597e-06	115700000	115780000	116030000	116110000	724	0.515625	UI_796
chr1	115740000	115750000	chr1	116030000	116040000	22	2.11606545577124e-06	0.000110009	115700000	115780000	116030000	116110000	724	0.515625	UI_797
chr1	155360000	155370000	chr1	155530000	155540000	38	5.77317463775485e-17	1.65687478497359e-14	155260000	155370000	155530000	155580000	740	0.581818	UI_798
chr1	155290000	155300000	chr1	155560000	155570000	27	2.70870362335075e-15	6.35461430361699e-13	155260000	155370000	155530000	155580000	740	0.581818	UI_799
chr1	155310000	155320000	chr1	155530000	155540000	36	2.95548332433794e-12	4.57563511434615e-10	155260000	155370000	155530000	155580000	740	0.581818	UI_800
chr1	155350000	155360000	chr1	155560000	155570000	25	1.56332281262333e-08	1.28938847803603e-06	155260000	155370000	155530000	155580000	740	0.581818	UI_801
chr1	155260000	155270000	chr1	155530000	155540000	19	4.27166185361229e-08	3.22827028527776e-06	155260000	155370000	155530000	155580000	740	0.581818	UI_802
chr1	155320000	155330000	chr1	155570000	155580000	24	6.54774067463764e-08	4.76165695875035e-06	155260000	155370000	155530000	155580000	740	0.581818	UI_803
chr1	155260000	155270000	chr1	155560000	155570000	12	3.51213061816448e-05	0.00132153	155260000	155370000	155530000	155580000	740	0.581818	UI_804
chr1	23010000	23020000	chr1	23210000	23220000	42	1.94743540319069e-23	1.09282525819895e-20	22980000	23090000	23170000	23260000	815	0.323232	UI_805
chr1	23060000	23070000	chr1	23210000	23220000	52	5.88842699054723e-23	3.15741198602953e-20	22980000	23090000	23170000	23260000	815	0.323232	UI_806
chr1	23010000	23020000	chr1	23250000	23260000	22	8.1809420498296e-09	7.12251881191422e-07	22980000	23090000	23170000	23260000	815	0.323232	UI_807
chr1	23070000	23080000	chr1	23180000	23190000	28	8.9199573304412e-09	7.71012639062259e-07	22980000	23090000	23170000	23260000	815	0.323232	UI_808
chr1	23010000	23020000	chr1	23180000	23190000	14	0.000114473	0.00368648	22980000	23090000	23170000	23260000	815	0.323232	UI_809
chr1	22980000	22990000	chr1	23210000	23220000	14	0.000193566	0.00578504	22980000	23090000	23170000	23260000	815	0.323232	UI_810
chr1	236020000	236030000	chr1	236110000	236120000	94	1.15181378554581e-27	9.35940324295966e-25	236020000	236050000	236060000	236190000	2320	0.794872	UI_811
chr1	236020000	236030000	chr1	236140000	236150000	78	2.9871677710367e-19	1.10582095130297e-16	236020000	236050000	236060000	236190000	2320	0.794872	UI_812
chr1	236040000	236050000	chr1	236080000	236090000	134	5.44434051050212e-16	1.38979302065513e-13	236020000	236050000	236060000	236190000	2320	0.794872	UI_813
chr1	236020000	236030000	chr1	236180000	236190000	42	8.78719840806331e-11	1.08412465822678e-08	236020000	236050000	236060000	236190000	2320	0.794872	UI_814
chr1	245760000	245770000	chr1	246030000	246040000	50	1.60320285882129e-22	8.26139741073735e-20	245720000	245810000	245910000	246050000	775	0.246032	UI_815
chr1	245760000	245770000	chr1	245970000	245980000	29	6.58564448679946e-12	9.68426125272195e-10	245720000	245810000	245910000	246050000	775	0.246032	UI_816
chr1	245730000	245740000	chr1	246030000	246040000	35	1.74054368733293e-11	2.40068789940161e-09	245720000	245810000	245910000	246050000	775	0.246032	UI_817
chr1	245760000	245770000	chr1	245920000	245930000	26	1.02107507625632e-07	7.1389829219097e-06	245720000	245810000	245910000	246050000	775	0.246032	UI_818
chr1	245800000	245810000	chr1	246030000	246040000	28	1.68243143263246e-06	8.95771199656033e-05	245720000	245810000	245910000	246050000	775	0.246032	UI_819
chr1	245770000	245780000	chr1	246000000	246010000	16	3.72497734368151e-06	0.000182454	245720000	245810000	245910000	246050000	775	0.246032	UI_820
chr1	246030000	246040000	chr1	246160000	246170000	103	1.28617890104045e-44	3.24508246506218e-41	245950000	246070000	246110000	246170000	1209	0.444444	UI_821
chr1	246030000	246040000	chr1	246130000	246140000	71	2.97726030653328e-26	2.15383597586216e-23	245950000	246070000	246110000	246170000	1209	0.444444	UI_822
chr1	245960000	245970000	chr1	246160000	246170000	34	7.59858358888978e-17	2.15108942402206e-14	245950000	246070000	246110000	246170000	1209	0.444444	UI_823
chr1	246060000	246070000	chr1	246110000	246120000	45	2.60841314310521e-11	3.49697956954821e-09	245950000	246070000	246110000	246170000	1209	0.444444	UI_824
chr1	245950000	245960000	chr1	246130000	246140000	21	1.8490125998563e-07	1.22343665734324e-05	245950000	246070000	246110000	246170000	1209	0.444444	UI_825
chr1	245990000	246000000	chr1	246160000	246170000	21	3.10625049168481e-06	0.000155179	245950000	246070000	246110000	246170000	1209	0.444444	UI_826
chr1	95150000	95160000	chr1	95250000	95260000	81	4.19464717170038e-27	3.26177642726837e-24	95130000	95180000	95190000	95270000	1740	0.75	UI_827
chr1	95160000	95170000	chr1	95190000	95200000	120	5.48322450489657e-11	6.99258688795026e-09	95130000	95180000	95190000	95270000	1740	0.75	UI_828
chr1	95130000	95140000	chr1	95190000	95200000	63	1.32030003674307e-06	7.20943705623918e-05	95130000	95180000	95190000	95270000	1740	0.75	UI_829
chr1	95130000	95140000	chr1	95220000	95230000	41	2.05312810941449e-06	0.000107071	95130000	95180000	95190000	95270000	1740	0.75	UI_830
chr1	95160000	95170000	chr1	95220000	95230000	54	4.06802354201729e-06	0.000197359	95130000	95180000	95190000	95270000	1740	0.75	UI_831
chr1	170370000	170380000	chr1	170630000	170640000	53	2.38709697013536e-27	1.89128177467046e-24	170350000	170450000	170630000	170700000	785	0.442857	UI_832
chr1	170430000	170440000	chr1	170630000	170640000	50	1.9073223920275e-15	4.55785616279059e-13	170350000	170450000	170630000	170700000	785	0.442857	UI_833
chr1	170430000	170440000	chr1	170690000	170700000	28	8.77703754899884e-10	9.12662741111283e-08	170350000	170450000	170630000	170700000	785	0.442857	UI_834
chr1	170380000	170390000	chr1	170660000	170670000	23	1.34768974885453e-08	1.1256187850745e-06	170350000	170450000	170630000	170700000	785	0.442857	UI_835
chr1	170380000	170390000	chr1	170690000	170700000	18	4.47580110051018e-07	2.72259435297784e-05	170350000	170450000	170630000	170700000	785	0.442857	UI_836
chr1	170430000	170440000	chr1	170660000	170670000	25	1.1379385684088e-05	0.000491491	170350000	170450000	170630000	170700000	785	0.442857	UI_837
chr1	170400000	170410000	chr1	170630000	170640000	23	7.97741810603971e-05	0.00269806	170350000	170450000	170630000	170700000	785	0.442857	UI_838
chr1	230210000	230220000	chr1	230240000	230250000	146	4.57179623011792e-19	1.65935273458658e-16	230200000	230280000	230240000	230310000	2418	0.535714	UI_839
chr1	230240000	230250000	chr1	230290000	230300000	99	1.7189258152441e-13	3.17873385480693e-11	230200000	230280000	230240000	230310000	2418	0.535714	UI_840
chr1	230200000	230210000	chr1	230300000	230310000	40	3.07150741329192e-13	5.48144503327751e-11	230200000	230280000	230240000	230310000	2418	0.535714	UI_841
chr1	230270000	230280000	chr1	230290000	230300000	106	1.24040961054247e-07	8.51736624049303e-06	230200000	230280000	230240000	230310000	2418	0.535714	UI_842
chr1	230210000	230220000	chr1	230270000	230280000	49	4.77964411066758e-07	2.8889996757379e-05	230200000	230280000	230240000	230310000	2418	0.535714	UI_843
chr1	230240000	230250000	chr1	230260000	230270000	133	2.6937046554073e-06	0.000136592	230200000	230280000	230240000	230310000	2418	0.535714	UI_844
chr1	9320000	9330000	chr1	9620000	9630000	32	5.78483997753345e-18	1.85851182193441e-15	9290000	9380000	9590000	9660000	522	0.492063	UI_845
chr1	9370000	9380000	chr1	9620000	9630000	26	6.66608729209094e-09	5.90170442666855e-07	9290000	9380000	9590000	9660000	522	0.492063	UI_846
chr1	9290000	9300000	chr1	9620000	9630000	22	2.26203513672833e-08	1.80720787882431e-06	9290000	9380000	9590000	9660000	522	0.492063	UI_847
chr1	9320000	9330000	chr1	9590000	9600000	18	5.45637263295387e-08	4.03451565916208e-06	9290000	9380000	9590000	9660000	522	0.492063	UI_848
chr1	9370000	9380000	chr1	9590000	9600000	17	8.37505530682769e-05	0.00281393	9290000	9380000	9590000	9660000	522	0.492063	UI_849
chr1	9340000	9350000	chr1	9650000	9660000	12	9.92835049939714e-05	0.00326058	9290000	9380000	9590000	9660000	522	0.492063	UI_850
chr1	9290000	9300000	chr1	9590000	9600000	14	0.000213287	0.00628488	9290000	9380000	9590000	9660000	522	0.492063	UI_851
chr1	32680000	32690000	chr1	32820000	32830000	61	2.5176547321733e-29	2.33901584409376e-26	32660000	32690000	32730000	32870000	1114	0.690476	UI_852
chr1	32680000	32690000	chr1	32860000	32870000	39	7.14321382875514e-11	8.94086468159755e-09	32660000	32690000	32730000	32870000	1114	0.690476	UI_853
chr1	32680000	32690000	chr1	32740000	32750000	56	6.77580869598432e-09	5.99041442315275e-07	32660000	32690000	32730000	32870000	1114	0.690476	UI_854
chr1	32680000	32690000	chr1	32790000	32800000	49	2.71570046886191e-08	2.13502525837685e-06	32660000	32690000	32730000	32870000	1114	0.690476	UI_855
chr1	62640000	62650000	chr1	62870000	62880000	40	1.66955843774765e-34	2.25457255754575e-31	62610000	62720000	62840000	62890000	655	0.527273	UI_856
chr1	62690000	62700000	chr1	62860000	62870000	43	5.75125161319535e-22	2.81199589280451e-19	62610000	62720000	62840000	62890000	655	0.527273	UI_857
chr1	62640000	62650000	chr1	62840000	62850000	16	1.09045810433438e-05	0.000473454	62610000	62720000	62840000	62890000	655	0.527273	UI_858
chr1	62610000	62620000	chr1	62860000	62870000	12	3.17562397484796e-05	0.0012102	62610000	62720000	62840000	62890000	655	0.527273	UI_859
chr1	115710000	115720000	chr1	115870000	115880000	98	1.4574214012419e-44	3.66934382362598e-41	115700000	115760000	115820000	115890000	1373	0.714286	UI_860
chr1	115710000	115720000	chr1	115830000	115840000	54	1.55731720694087e-17	4.76682847851871e-15	115700000	115760000	115820000	115890000	1373	0.714286	UI_861
chr1	115750000	115760000	chr1	115870000	115880000	38	3.98545426622603e-08	3.02976223099491e-06	115700000	115760000	115820000	115890000	1373	0.714286	UI_862
chr1	178500000	178510000	chr1	178970000	178980000	46	8.06947682362496e-43	1.84293065510747e-39	178480000	178520000	178940000	179060000	546	0.604167	UI_863
chr1	178500000	178510000	chr1	179000000	179010000	36	1.03003038004241e-26	7.73674561400307e-24	178480000	178520000	178940000	179060000	546	0.604167	UI_864
chr1	178500000	178510000	chr1	179050000	179060000	28	6.77139025199458e-20	2.67663522576393e-17	178480000	178520000	178940000	179060000	546	0.604167	UI_865
chr1	178500000	178510000	chr1	178940000	178950000	20	6.33728350738771e-13	1.08265186129121e-10	178480000	178520000	178940000	179060000	546	0.604167	UI_866
chr1	198460000	198470000	chr1	198640000	198650000	86	5.23598598394587e-47	1.5221465259008e-43	198380000	198480000	198610000	198680000	875	0.428571	UI_867
chr1	198430000	198440000	chr1	198640000	198650000	46	2.74091518395731e-24	1.66484321500653e-21	198380000	198480000	198610000	198680000	875	0.428571	UI_868
chr1	198400000	198410000	chr1	198650000	198660000	25	2.33890006706864e-08	1.8631574700107e-06	198380000	198480000	198610000	198680000	875	0.428571	UI_869
chr1	198460000	198470000	chr1	198670000	198680000	18	8.50847885302937e-07	4.85906752483003e-05	198380000	198480000	198610000	198680000	875	0.428571	UI_870
chr1	198460000	198470000	chr1	198610000	198620000	26	5.88212190411259e-05	0.00207193	198380000	198480000	198610000	198680000	875	0.428571	UI_871
chr1	218520000	218530000	chr1	218850000	218860000	24	9.68016016046426e-14	1.85303606349829e-11	218500000	218560000	218810000	218960000	478	0.377778	UI_872
chr1	218510000	218520000	chr1	218880000	218890000	23	7.57838566454192e-12	1.10431274408156e-09	218500000	218560000	218810000	218960000	478	0.377778	UI_873
chr1	218510000	218520000	chr1	218910000	218920000	18	3.4929061176123e-09	3.25706491139323e-07	218500000	218560000	218810000	218960000	478	0.377778	UI_874
chr1	218550000	218560000	chr1	218870000	218880000	19	1.41124495490417e-08	1.17390686578513e-06	218500000	218560000	218810000	218960000	478	0.377778	UI_875
chr1	218510000	218520000	chr1	218950000	218960000	14	1.70475261145363e-05	0.000701957	218500000	218560000	218810000	218960000	478	0.377778	UI_876
chr1	218510000	218520000	chr1	218820000	218830000	15	0.000220652	0.00646873	218500000	218560000	218810000	218960000	478	0.377778	UI_877
chr1	16930000	16940000	chr1	17240000	17250000	38	1.1707441091306e-21	5.54924198508178e-19	16910000	16980000	17200000	17280000	555	0.5	UI_878
chr1	16930000	16940000	chr1	17270000	17280000	26	4.92161212636373e-15	1.11683368077796e-12	16910000	16980000	17200000	17280000	555	0.5	UI_879
chr1	16960000	16970000	chr1	17210000	17220000	25	1.58414096930207e-14	3.36925986137938e-12	16910000	16980000	17200000	17280000	555	0.5	UI_880
chr1	16930000	16940000	chr1	17210000	17220000	25	7.00317529325491e-12	1.02601559303998e-09	16910000	16980000	17200000	17280000	555	0.5	UI_881
chr1	16960000	16970000	chr1	17240000	17250000	13	0.000114973	0.00370022	16910000	16980000	17200000	17280000	555	0.5	UI_882
chr1	26940000	26950000	chr1	27180000	27190000	45	2.16419078173583e-23	1.21001582160485e-20	26880000	26950000	27150000	27240000	592	0.47619	UI_883
chr1	26940000	26950000	chr1	27150000	27160000	36	6.10269769279521e-15	1.36916367368941e-12	26880000	26950000	27150000	27240000	592	0.47619	UI_884
chr1	26900000	26910000	chr1	27190000	27200000	23	1.94639591348429e-10	2.26528239257548e-08	26880000	26950000	27150000	27240000	592	0.47619	UI_885
chr1	26900000	26910000	chr1	27150000	27160000	17	2.61096033834067e-06	0.000132803	26880000	26950000	27150000	27240000	592	0.47619	UI_886
chr1	26940000	26950000	chr1	27230000	27240000	18	3.73145238050465e-06	0.000182741	26880000	26950000	27150000	27240000	592	0.47619	UI_887
chr1	32170000	32180000	chr1	32420000	32430000	73	1.55835452259431e-28	1.36189488937114e-25	32080000	32190000	32400000	32460000	852	0.439394	UI_888
chr1	32120000	32130000	chr1	32420000	32430000	44	2.20628051656467e-15	5.23123896621545e-13	32080000	32190000	32400000	32460000	852	0.439394	UI_889
chr1	32090000	32100000	chr1	32420000	32430000	18	1.21126175459005e-05	0.000519381	32080000	32190000	32400000	32460000	852	0.439394	UI_890
chr1	32170000	32180000	chr1	32450000	32460000	19	1.79873347452695e-05	0.00073585	32080000	32190000	32400000	32460000	852	0.439394	UI_891
chr1	41340000	41350000	chr1	41410000	41420000	51	8.84037621027076e-14	1.70132335469021e-11	41280000	41370000	41400000	41480000	850	0.402778	UI_892
chr1	41310000	41320000	chr1	41410000	41420000	41	5.08991773966946e-11	6.52564050917828e-09	41280000	41370000	41400000	41480000	850	0.402778	UI_893
chr1	41320000	41330000	chr1	41440000	41450000	30	3.10422639901041e-08	2.41203650463202e-06	41280000	41370000	41400000	41480000	850	0.402778	UI_894
chr1	41320000	41330000	chr1	41470000	41480000	15	1.42217497366916e-05	0.000598429	41280000	41370000	41400000	41480000	850	0.402778	UI_895
chr1	41350000	41360000	chr1	41440000	41450000	28	0.000148209	0.00460156	41280000	41370000	41400000	41480000	850	0.402778	UI_896
chr1	41280000	41290000	chr1	41410000	41420000	15	0.000227269	0.00663432	41280000	41370000	41400000	41480000	850	0.402778	UI_897
chr1	43430000	43440000	chr1	43520000	43530000	127	1.79470531932035e-50	6.33487857407462e-47	43370000	43450000	43500000	43550000	1427	0.7	UI_898
chr1	43400000	43410000	chr1	43520000	43530000	114	3.01652403979922e-48	9.43064701776892e-45	43370000	43450000	43500000	43550000	1427	0.7	UI_899
chr1	43370000	43380000	chr1	43530000	43540000	26	1.82051019334833e-07	1.20621919635319e-05	43370000	43450000	43500000	43550000	1427	0.7	UI_900
chr1	43690000	43700000	chr1	43830000	43840000	78	2.55216621317562e-42	5.68782175922108e-39	43670000	43720000	43810000	43920000	904	0.545455	UI_901
chr1	43690000	43700000	chr1	43880000	43890000	40	1.04211106703323e-14	2.27056479514659e-12	43670000	43720000	43810000	43920000	904	0.545455	UI_902
chr1	43690000	43700000	chr1	43910000	43920000	23	3.15107191994318e-07	1.98281173216934e-05	43670000	43720000	43810000	43920000	904	0.545455	UI_903
chr1	56180000	56190000	chr1	57040000	57050000	43	3.67736862827876e-40	7.20331318440393e-37	56130000	56220000	57020000	57140000	423	0.259259	UI_904
chr1	56140000	56150000	chr1	57040000	57050000	18	3.15792064534712e-12	4.86825669376571e-10	56130000	56220000	57020000	57140000	423	0.259259	UI_905
chr1	56180000	56190000	chr1	57090000	57100000	14	1.08083665344315e-08	9.18664084849554e-07	56130000	56220000	57020000	57140000	423	0.259259	UI_906
chr1	56180000	56190000	chr1	57130000	57140000	10	3.5463899130995e-05	0.00133272	56130000	56220000	57020000	57140000	423	0.259259	UI_907
chr1	56210000	56220000	chr1	57040000	57050000	10	4.7017741953352e-05	0.00170537	56130000	56220000	57020000	57140000	423	0.259259	UI_908
chr1	78470000	78480000	chr1	78570000	78580000	92	1.44097199284818e-40	2.88874288860245e-37	78460000	78550000	78510000	78590000	1702	0.402778	UI_909
chr1	78510000	78520000	chr1	78560000	78570000	88	2.95913965846453e-20	1.21309776608147e-17	78460000	78550000	78510000	78590000	1702	0.402778	UI_910
chr1	78470000	78480000	chr1	78530000	78540000	56	5.35785033607809e-11	6.84518902615042e-09	78460000	78550000	78510000	78590000	1702	0.402778	UI_911
chr1	78540000	78550000	chr1	78560000	78570000	104	6.51816666333967e-08	4.74263317657313e-06	78460000	78550000	78510000	78590000	1702	0.402778	UI_912
chr1	161920000	161930000	chr1	161970000	161980000	188	1.3369636841692e-41	2.85296419791366e-38	161810000	161960000	161950000	162010000	2185	0.4	UI_913
chr1	161870000	161880000	chr1	161970000	161980000	87	7.47398863985911e-27	5.67926067704009e-24	161810000	161960000	161950000	162010000	2185	0.4	UI_914
chr1	161950000	161960000	chr1	161970000	161980000	185	5.59206059971573e-23	3.00482566058998e-20	161810000	161960000	161950000	162010000	2185	0.4	UI_915
chr1	161810000	161820000	chr1	161970000	161980000	56	5.26472329679822e-13	9.09784757072831e-11	161810000	161960000	161950000	162010000	2185	0.4	UI_916
chr1	161840000	161850000	chr1	161970000	161980000	45	4.46221705474157e-09	4.07958240956331e-07	161810000	161960000	161950000	162010000	2185	0.4	UI_917
chr1	161910000	161920000	chr1	162000000	162010000	26	6.16312228170264e-05	0.00215757	161810000	161960000	161950000	162010000	2185	0.4	UI_918
chr1	44250000	44260000	chr1	44320000	44330000	70	2.44431887861634e-18	8.17947211590654e-16	44230000	44270000	44280000	44360000	1318	0.84375	UI_919
chr1	44250000	44260000	chr1	44280000	44290000	96	8.81448848568637e-13	1.47432041734725e-10	44230000	44270000	44280000	44360000	1318	0.84375	UI_920
chr1	44240000	44250000	chr1	44350000	44360000	41	1.53786623026427e-12	2.48451592055527e-10	44230000	44270000	44280000	44360000	1318	0.84375	UI_921
chr1	68000000	68010000	chr1	68220000	68230000	54	2.53694547705879e-39	4.72866298915403e-36	67990000	68060000	68190000	68240000	939	0.771429	UI_922
chr1	68030000	68040000	chr1	68220000	68230000	45	8.33874369844064e-22	4.00990504557973e-19	67990000	68060000	68190000	68240000	939	0.771429	UI_923
chr1	68030000	68040000	chr1	68190000	68200000	28	5.38693280665074e-10	5.81204016176623e-08	67990000	68060000	68190000	68240000	939	0.771429	UI_924
chr1	68000000	68010000	chr1	68190000	68200000	15	2.24766939384827e-05	0.000894406	67990000	68060000	68190000	68240000	939	0.771429	UI_925
chr1	95320000	95330000	chr1	95500000	95510000	96	3.54545489453138e-67	2.77593337593375e-63	95260000	95360000	95460000	95530000	810	0.4	UI_926
chr1	95350000	95360000	chr1	95500000	95510000	35	2.7555484740808e-14	5.67919852092416e-12	95260000	95360000	95460000	95530000	810	0.4	UI_927
chr1	95320000	95330000	chr1	95470000	95480000	31	1.5803154883054e-09	1.5701667513624e-07	95260000	95360000	95460000	95530000	810	0.4	UI_928
chr1	95270000	95280000	chr1	95500000	95510000	21	2.48715155160469e-06	0.000127157	95260000	95360000	95460000	95530000	810	0.4	UI_929
chr1	109810000	109820000	chr1	109930000	109940000	49	4.68595294177626e-24	2.78789885399276e-21	109780000	109850000	109900000	109990000	825	0.47619	UI_930
chr1	109840000	109850000	chr1	109930000	109940000	59	8.59342231141807e-20	3.35884697179599e-17	109780000	109850000	109900000	109990000	825	0.47619	UI_931
chr1	109820000	109830000	chr1	109960000	109970000	35	7.82572459759232e-13	1.31892199051168e-10	109780000	109850000	109900000	109990000	825	0.47619	UI_932
chr1	109820000	109830000	chr1	109900000	109910000	35	4.12582320080449e-12	6.25489230926823e-10	109780000	109850000	109900000	109990000	825	0.47619	UI_933
chr1	109780000	109790000	chr1	109930000	109940000	28	4.35500282951839e-10	4.77326340665975e-08	109780000	109850000	109900000	109990000	825	0.47619	UI_934
chr1	109780000	109790000	chr1	109960000	109970000	19	3.49462100946216e-06	0.000172372	109780000	109850000	109900000	109990000	825	0.47619	UI_935
chr1	110090000	110100000	chr1	110520000	110530000	38	1.16525799287991e-23	6.6702176505167e-21	110030000	110140000	110510000	110580000	472	0.376623	UI_936
chr1	110090000	110100000	chr1	110550000	110560000	24	5.36877421082642e-12	8.00423262945939e-10	110030000	110140000	110510000	110580000	472	0.376623	UI_937
chr1	110120000	110130000	chr1	110520000	110530000	23	4.97587597626721e-11	6.38923431943209e-09	110030000	110140000	110510000	110580000	472	0.376623	UI_938
chr1	110040000	110050000	chr1	110520000	110530000	21	4.67435838639883e-09	4.25813560909817e-07	110030000	110140000	110510000	110580000	472	0.376623	UI_939
chr1	170500000	170510000	chr1	170630000	170640000	150	3.0991141423323e-65	2.23202416160784e-61	170490000	170570000	170620000	170700000	1351	0.484375	UI_940
chr1	170530000	170540000	chr1	170630000	170640000	99	1.70687444783985e-27	1.36825931659813e-24	170490000	170570000	170620000	170700000	1351	0.484375	UI_941
chr1	170560000	170570000	chr1	170630000	170640000	104	1.85737310458173e-25	1.25133384703468e-22	170490000	170570000	170620000	170700000	1351	0.484375	UI_942
chr1	170500000	170510000	chr1	170680000	170690000	50	5.54217542755044e-16	1.41335080597595e-13	170490000	170570000	170620000	170700000	1351	0.484375	UI_943
chr1	170530000	170540000	chr1	170660000	170670000	38	4.79286936455981e-06	0.000228363	170490000	170570000	170620000	170700000	1351	0.484375	UI_944
chr1	201860000	201870000	chr1	201930000	201940000	91	2.07928005519151e-36	3.1928582665388e-33	201800000	201890000	201900000	201960000	1779	0.537037	UI_945
chr1	201880000	201890000	chr1	201900000	201910000	165	3.06586800919843e-22	1.53950822515962e-19	201800000	201890000	201900000	201960000	1779	0.537037	UI_946
chr1	201820000	201830000	chr1	201930000	201940000	36	3.35059957579683e-11	4.41734120189761e-09	201800000	201890000	201900000	201960000	1779	0.537037	UI_947
chr1	201850000	201860000	chr1	201900000	201910000	46	5.82446253577764e-07	3.4535622246818e-05	201800000	201890000	201900000	201960000	1779	0.537037	UI_948
chr1	46490000	46500000	chr1	46640000	46650000	79	6.53259722173882e-50	2.24942855419249e-46	46460000	46540000	46590000	46670000	824	0.40625	UI_949
chr1	46520000	46530000	chr1	46640000	46650000	32	3.2894815629083e-12	5.05722125521196e-10	46460000	46540000	46590000	46670000	824	0.40625	UI_950
chr1	46490000	46500000	chr1	46600000	46610000	34	3.68977037270546e-12	5.63262425266396e-10	46460000	46540000	46590000	46670000	824	0.40625	UI_951
chr1	46520000	46530000	chr1	46590000	46600000	26	1.81044753970803e-07	1.20022615888944e-05	46460000	46540000	46590000	46670000	824	0.40625	UI_952
chr1	46460000	46470000	chr1	46640000	46650000	30	2.37815406321445e-06	0.000122145	46460000	46540000	46590000	46670000	824	0.40625	UI_953
chr1	59370000	59380000	chr1	60190000	60200000	18	8.24583028216761e-13	1.38492396473863e-10	59330000	59400000	60150000	60230000	317	0.482143	UI_954
chr1	59340000	59350000	chr1	60190000	60200000	17	1.52239019746892e-11	2.11966738437077e-09	59330000	59400000	60150000	60230000	317	0.482143	UI_955
chr1	59340000	59350000	chr1	60150000	60160000	16	2.75167995054017e-10	3.12264609213958e-08	59330000	59400000	60150000	60230000	317	0.482143	UI_956
chr1	59370000	59380000	chr1	60160000	60170000	15	5.11341241193048e-10	5.5386697642831e-08	59330000	59400000	60150000	60230000	317	0.482143	UI_957
chr1	59370000	59380000	chr1	60220000	60230000	10	7.95718217287842e-06	0.000358276	59330000	59400000	60150000	60230000	317	0.482143	UI_958
chr1	36570000	36580000	chr1	36590000	36600000	179	6.7647018716759e-26	4.73306620739864e-23	36550000	36590000	36590000	36700000	1367	0.568182	UI_959
chr1	36570000	36580000	chr1	36680000	36690000	55	4.34850883830595e-13	7.60444905397444e-11	36550000	36590000	36590000	36700000	1367	0.568182	UI_960
chr1	36570000	36580000	chr1	36630000	36640000	87	2.45247197286159e-11	3.30268696092044e-09	36550000	36590000	36590000	36700000	1367	0.568182	UI_961
chr1	154440000	154450000	chr1	154910000	154920000	21	8.47141539109413e-14	1.63434609901688e-11	154370000	154460000	154900000	154960000	343	0.462963	UI_962
chr1	154440000	154450000	chr1	154940000	154950000	21	1.7444564396347e-11	2.40583644982602e-09	154370000	154460000	154900000	154960000	343	0.462963	UI_963
chr1	154390000	154400000	chr1	154940000	154950000	19	1.56359109568255e-09	1.55484976764882e-07	154370000	154460000	154900000	154960000	343	0.462963	UI_964
chr1	154390000	154400000	chr1	154900000	154910000	13	3.04045380783274e-06	0.000152232	154370000	154460000	154900000	154960000	343	0.462963	UI_965
chr1	200590000	200600000	chr1	200770000	200780000	32	7.16508238106488e-21	3.13230281870666e-18	200570000	200640000	200730000	200820000	483	0.444444	UI_966
chr1	200630000	200640000	chr1	200760000	200770000	24	8.99145901868882e-10	9.33270855930368e-08	200570000	200640000	200730000	200820000	483	0.444444	UI_967
chr1	200590000	200600000	chr1	200740000	200750000	18	2.28218206032588e-07	1.48056689214352e-05	200570000	200640000	200730000	200820000	483	0.444444	UI_968
chr1	200600000	200610000	chr1	200800000	200810000	13	6.7788061354793e-06	0.000310861	200570000	200640000	200730000	200820000	483	0.444444	UI_969
chr1	234850000	234860000	chr1	235240000	235250000	104	3.88117786307653e-85	6.14960960121421e-81	234830000	234920000	235240000	235300000	755	0.462963	UI_970
chr1	234900000	234910000	chr1	235240000	235250000	42	4.49222419970043e-22	2.21999401526469e-19	234830000	234920000	235240000	235300000	755	0.462963	UI_971
chr1	234860000	234870000	chr1	235270000	235280000	19	1.54939093406401e-07	1.04208344558825e-05	234830000	234920000	235240000	235300000	755	0.462963	UI_972
chr1	234900000	234910000	chr1	235270000	235280000	13	0.000212185	0.00625731	234830000	234920000	235240000	235300000	755	0.462963	UI_973
chr1	8450000	8460000	chr1	8770000	8780000	47	6.32748888166986e-26	4.44168954565154e-23	8430000	8490000	8700000	8790000	537	0.481481	UI_974
chr1	8450000	8460000	chr1	8700000	8710000	30	6.52995228082794e-13	1.11353937936872e-10	8430000	8490000	8700000	8790000	537	0.481481	UI_975
chr1	8480000	8490000	chr1	8760000	8770000	21	1.53270171605157e-08	1.26620232020722e-06	8430000	8490000	8700000	8790000	537	0.481481	UI_976
chr1	8480000	8490000	chr1	8720000	8730000	24	3.22769209523635e-08	2.49969023327973e-06	8430000	8490000	8700000	8790000	537	0.481481	UI_977
chr1	8450000	8460000	chr1	8740000	8750000	19	3.85497301883547e-07	2.37963750962742e-05	8430000	8490000	8700000	8790000	537	0.481481	UI_978
chr1	15920000	15930000	chr1	16030000	16040000	59	9.7834507640787e-21	4.22088296391097e-18	15910000	15970000	16000000	16050000	1103	0.8	UI_979
chr1	15950000	15960000	chr1	16000000	16010000	80	2.23525954444127e-17	6.71926847085107e-15	15910000	15970000	16000000	16050000	1103	0.8	UI_980
chr1	15920000	15930000	chr1	16000000	16010000	47	1.91259486852443e-08	1.55057769630434e-06	15910000	15970000	16000000	16050000	1103	0.8	UI_981
chr1	15950000	15960000	chr1	16030000	16040000	40	5.6064437505656e-07	3.33690684782513e-05	15910000	15970000	16000000	16050000	1103	0.8	UI_982
chr1	28410000	28420000	chr1	28530000	28540000	89	4.97815201547562e-36	7.45375781151595e-33	28400000	28480000	28500000	28570000	846	0.464286	UI_983
chr1	28410000	28420000	chr1	28500000	28510000	41	2.03339362211841e-11	2.77483534491788e-09	28400000	28480000	28500000	28570000	846	0.464286	UI_984
chr1	28440000	28450000	chr1	28510000	28520000	33	1.90513992668015e-09	1.86630876465846e-07	28400000	28480000	28500000	28570000	846	0.464286	UI_985
chr1	28470000	28480000	chr1	28510000	28520000	40	6.4184087417876e-08	4.67663490545505e-06	28400000	28480000	28500000	28570000	846	0.464286	UI_986
chr1	28410000	28420000	chr1	28560000	28570000	27	9.46479477568554e-08	6.66378824350809e-06	28400000	28480000	28500000	28570000	846	0.464286	UI_987
chr1	36610000	36620000	chr1	36650000	36660000	111	1.47075139729832e-21	6.8984909934856e-19	36590000	36670000	36630000	36700000	1771	0.428571	UI_988
chr1	36660000	36670000	chr1	36680000	36690000	101	4.68445977070908e-12	7.04874967990295e-10	36590000	36670000	36630000	36700000	1771	0.428571	UI_989
chr1	36620000	36630000	chr1	36680000	36690000	71	1.804954898996e-11	2.483667172339e-09	36590000	36670000	36630000	36700000	1771	0.428571	UI_990
chr1	59250000	59260000	chr1	59610000	59620000	38	3.55360281673455e-21	1.60371295601757e-18	59180000	59260000	59570000	59670000	455	0.3125	UI_991
chr1	59220000	59230000	chr1	59610000	59620000	29	3.88449726055244e-14	7.84644676572056e-12	59180000	59260000	59570000	59670000	455	0.3125	UI_992
chr1	59250000	59260000	chr1	59640000	59650000	18	7.34242942028149e-09	6.44871200320025e-07	59180000	59260000	59570000	59670000	455	0.3125	UI_993
chr1	59250000	59260000	chr1	59570000	59580000	21	1.40744371256359e-06	7.63367948992655e-05	59180000	59260000	59570000	59670000	455	0.3125	UI_994
chr1	59220000	59230000	chr1	59580000	59590000	15	3.48768302984577e-06	0.000172065	59180000	59260000	59570000	59670000	455	0.3125	UI_995
chr1	59180000	59190000	chr1	59610000	59620000	13	2.12459043623574e-05	0.000851353	59180000	59260000	59570000	59670000	455	0.3125	UI_996
chr1	92190000	92200000	chr1	92350000	92360000	57	3.18313239094676e-22	1.59614367386876e-19	92190000	92270000	92350000	92400000	789	0.6	UI_997
chr1	92220000	92230000	chr1	92350000	92360000	64	3.30730098180288e-19	1.21876280385042e-16	92190000	92270000	92350000	92400000	789	0.6	UI_998
chr1	92200000	92210000	chr1	92380000	92390000	32	2.58430331117672e-13	4.66230933205212e-11	92190000	92270000	92350000	92400000	789	0.6	UI_999
chr1	92250000	92260000	chr1	92350000	92360000	37	2.70314314821357e-09	2.57410815406637e-07	92190000	92270000	92350000	92400000	789	0.6	UI_1000
chr1	92240000	92250000	chr1	92390000	92400000	29	1.22793523957186e-08	1.03349061114644e-06	92190000	92270000	92350000	92400000	789	0.6	UI_1001
chr1	95390000	95400000	chr1	95500000	95510000	64	6.28542231975541e-28	5.2269398026921e-25	95370000	95450000	95470000	95510000	1081	0.75	UI_1002
chr1	95440000	95450000	chr1	95480000	95490000	59	4.40173905776809e-09	4.02880193081399e-07	95370000	95450000	95470000	95510000	1081	0.75	UI_1003
chr1	95390000	95400000	chr1	95470000	95480000	33	1.05205281260806e-06	5.88287756982562e-05	95370000	95450000	95470000	95510000	1081	0.75	UI_1004
chr1	153540000	153550000	chr1	153580000	153590000	135	1.73493516681714e-26	1.27924371030389e-23	153500000	153570000	153560000	153610000	1695	0.685714	UI_1005
chr1	153500000	153510000	chr1	153590000	153600000	72	1.2279713793953e-21	5.80788268416841e-19	153500000	153570000	153560000	153610000	1695	0.685714	UI_1006
chr1	153500000	153510000	chr1	153560000	153570000	37	7.16234907829933e-05	0.00245764	153500000	153570000	153560000	153610000	1695	0.685714	UI_1007
chr1	162600000	162610000	chr1	162740000	162750000	61	4.91146111960551e-24	2.91730097997854e-21	162570000	162620000	162710000	162780000	697	0.685714	UI_1008
chr1	162600000	162610000	chr1	162770000	162780000	44	1.12755729241062e-11	1.6006874503492e-09	162570000	162620000	162710000	162780000	697	0.685714	UI_1009
chr1	162570000	162580000	chr1	162760000	162770000	18	1.37620663087894e-07	9.35909416774704e-06	162570000	162620000	162710000	162780000	697	0.685714	UI_1010
chr1	162570000	162580000	chr1	162720000	162730000	19	4.28677864731981e-06	0.00020679	162570000	162620000	162710000	162780000	697	0.685714	UI_1011
chr1	162600000	162610000	chr1	162710000	162720000	42	1.6996788472166e-05	0.000700107	162570000	162620000	162710000	162780000	697	0.685714	UI_1012
chr1	164710000	164720000	chr1	164750000	164760000	176	3.14444590090829e-23	1.72955997008144e-20	164660000	164730000	164710000	164770000	2312	0.571429	UI_1013
chr1	164670000	164680000	chr1	164750000	164760000	97	1.02462435306528e-22	5.37499200089359e-20	164660000	164730000	164710000	164770000	2312	0.571429	UI_1014
chr1	164690000	164700000	chr1	164710000	164720000	204	2.16504269759238e-15	5.13824565363241e-13	164660000	164730000	164710000	164770000	2312	0.571429	UI_1015
chr1	164660000	164670000	chr1	164720000	164730000	51	4.99943254615723e-06	0.00023708	164660000	164730000	164710000	164770000	2312	0.571429	UI_1016
chr1	241770000	241780000	chr1	241990000	242000000	46	2.28604454200119e-28	1.9720632018361e-25	241750000	241820000	241980000	242040000	644	0.571429	UI_1017
chr1	241800000	241810000	chr1	242000000	242010000	30	4.88048646669539e-14	9.73164834069382e-12	241750000	241820000	241980000	242040000	644	0.571429	UI_1018
chr1	241770000	241780000	chr1	242020000	242030000	15	2.32557242104541e-06	0.000119717	241750000	241820000	241980000	242040000	644	0.571429	UI_1019
chr1	245310000	245320000	chr1	246030000	246040000	43	1.64796968223685e-37	2.72373963874338e-34	245300000	245400000	245990000	246060000	372	0.342857	UI_1020
chr1	245310000	245320000	chr1	245990000	246000000	17	3.97552680174656e-11	5.1825192807783e-09	245300000	245400000	245990000	246060000	372	0.342857	UI_1021
chr1	245360000	245370000	chr1	246030000	246040000	15	2.6976757496131e-08	2.12236791466578e-06	245300000	245400000	245990000	246060000	372	0.342857	UI_1022
chr1	245390000	245400000	chr1	246030000	246040000	10	8.72644375098555e-05	0.00291565	245300000	245400000	245990000	246060000	372	0.342857	UI_1023
chr1	16270000	16280000	chr1	16300000	16310000	170	2.32033905170897e-25	1.55054203413585e-22	16210000	16290000	16260000	16320000	2099	0.5	UI_1024
chr1	16210000	16220000	chr1	16270000	16280000	106	1.68208121059763e-15	4.04818808850358e-13	16210000	16290000	16260000	16320000	2099	0.5	UI_1025
chr1	16250000	16260000	chr1	16270000	16280000	162	5.91271964303923e-08	4.33963214430886e-06	16210000	16290000	16260000	16320000	2099	0.5	UI_1026
chr1	16230000	16240000	chr1	16310000	16320000	37	7.63154694863706e-06	0.000345292	16210000	16290000	16260000	16320000	2099	0.5	UI_1027
chr1	24520000	24530000	chr1	24710000	24720000	67	2.96670819131239e-52	1.15547903786944e-48	24490000	24570000	24680000	24750000	607	0.410714	UI_1028
chr1	24560000	24570000	chr1	24710000	24720000	24	5.78175930438333e-09	5.17606621267631e-07	24490000	24570000	24680000	24750000	607	0.410714	UI_1029
chr1	24510000	24520000	chr1	24740000	24750000	18	3.76419594989347e-08	2.87603394240706e-06	24490000	24570000	24680000	24750000	607	0.410714	UI_1030
chr1	24520000	24530000	chr1	24680000	24690000	22	2.7629894622331e-05	0.00107186	24490000	24570000	24680000	24750000	607	0.410714	UI_1031
chr1	33390000	33400000	chr1	33470000	33480000	60	7.77858801968128e-21	3.38983525334653e-18	33380000	33460000	33440000	33480000	1602	0.71875	UI_1032
chr1	33450000	33460000	chr1	33470000	33480000	170	7.72919699567468e-17	2.18621314108283e-14	33380000	33460000	33440000	33480000	1602	0.71875	UI_1033
chr1	33420000	33430000	chr1	33460000	33470000	73	3.55801742241522e-12	5.44398634262917e-10	33380000	33460000	33440000	33480000	1602	0.71875	UI_1034
chr1	54740000	54750000	chr1	54950000	54960000	53	2.60118615574289e-28	2.23365181370446e-25	54650000	54810000	54930000	54970000	615	0.390625	UI_1035
chr1	54680000	54690000	chr1	54950000	54960000	40	6.37960950670174e-24	3.74957525784526e-21	54650000	54810000	54930000	54970000	615	0.390625	UI_1036
chr1	54790000	54800000	chr1	54950000	54960000	43	6.03465943080051e-17	1.72751587414238e-14	54650000	54810000	54930000	54970000	615	0.390625	UI_1037
chr1	54710000	54720000	chr1	54950000	54960000	32	9.0836743075877e-16	2.25702674267334e-13	54650000	54810000	54930000	54970000	615	0.390625	UI_1038
chr1	54650000	54660000	chr1	54950000	54960000	16	0.000107495	0.00349183	54650000	54810000	54930000	54970000	615	0.390625	UI_1039
chr1	64240000	64250000	chr1	64600000	64610000	36	7.88833464613529e-25	5.03503794664455e-22	64230000	64290000	64580000	64650000	355	0.547619	UI_1040
chr1	64270000	64280000	chr1	64600000	64610000	16	4.32374259588566e-07	2.63871238904208e-05	64230000	64290000	64580000	64650000	355	0.547619	UI_1041
chr1	64260000	64270000	chr1	64630000	64640000	15	2.25645197208379e-06	0.000116529	64230000	64290000	64580000	64650000	355	0.547619	UI_1042
chr1	64230000	64240000	chr1	64630000	64640000	11	2.97605884567111e-05	0.00114366	64230000	64290000	64580000	64650000	355	0.547619	UI_1043
chr1	65710000	65720000	chr1	65880000	65890000	92	1.57625110856133e-45	4.2072065688181e-42	65650000	65750000	65870000	65910000	805	0.575	UI_1044
chr1	65740000	65750000	chr1	65880000	65890000	37	1.02211206907856e-11	1.46020308587186e-09	65650000	65750000	65870000	65910000	805	0.575	UI_1045
chr1	65680000	65690000	chr1	65880000	65890000	29	7.77360926494171e-11	9.6726258404897e-09	65650000	65750000	65870000	65910000	805	0.575	UI_1046
chr1	65650000	65660000	chr1	65880000	65890000	20	1.08820689606311e-06	6.063834404004e-05	65650000	65750000	65870000	65910000	805	0.575	UI_1047
chr1	66730000	66740000	chr1	66790000	66800000	135	1.70033683622934e-39	3.19996391367388e-36	66710000	66750000	66780000	66850000	1377	0.821429	UI_1048
chr1	66720000	66730000	chr1	66830000	66840000	53	3.95215521475736e-15	9.07585506463549e-13	66710000	66750000	66780000	66850000	1377	0.821429	UI_1049
chr1	162870000	162880000	chr1	163030000	163040000	50	1.45936147763121e-24	9.08399605019205e-22	162840000	162890000	163000000	163060000	616	0.766667	UI_1050
chr1	162840000	162850000	chr1	163030000	163040000	35	1.0685643672593e-20	4.590119568202e-18	162840000	162890000	163000000	163060000	616	0.766667	UI_1051
chr1	162880000	162890000	chr1	163000000	163010000	34	2.12106338015032e-12	3.35456100658002e-10	162840000	162890000	163000000	163060000	616	0.766667	UI_1052
chr1	162850000	162860000	chr1	163000000	163010000	27	8.48732320462642e-11	1.04980375742273e-08	162840000	162890000	163000000	163060000	616	0.766667	UI_1053
chr1	182110000	182120000	chr1	182360000	182370000	125	1.23695814264458e-109	4.43942284979339e-105	182040000	182140000	182290000	182400000	782	0.218182	UI_1054
chr1	182110000	182120000	chr1	182310000	182320000	53	8.4871434125176e-28	6.96955302407423e-25	182040000	182140000	182290000	182400000	782	0.218182	UI_1055
chr1	182050000	182060000	chr1	182360000	182370000	31	1.52379478770961e-17	4.66889570482374e-15	182040000	182140000	182290000	182400000	782	0.218182	UI_1056
chr1	182080000	182090000	chr1	182360000	182370000	22	4.2290818696598e-10	4.64586603922606e-08	182040000	182140000	182290000	182400000	782	0.218182	UI_1057
chr1	182110000	182120000	chr1	182390000	182400000	20	7.29646465102329e-08	5.25434082067709e-06	182040000	182140000	182290000	182400000	782	0.218182	UI_1058
chr1	220470000	220480000	chr1	220700000	220710000	64	1.25252562691131e-41	2.67598422177873e-38	220440000	220480000	220630000	220740000	641	0.545455	UI_1059
chr1	220470000	220480000	chr1	220650000	220660000	37	2.98461101408414e-14	6.12133548405935e-12	220440000	220480000	220630000	220740000	641	0.545455	UI_1060
chr1	220440000	220450000	chr1	220650000	220660000	31	7.11021256087018e-13	1.20576118308916e-10	220440000	220480000	220630000	220740000	641	0.545455	UI_1061
chr1	220440000	220450000	chr1	220700000	220710000	25	2.32461923447764e-10	2.67100003730547e-08	220440000	220480000	220630000	220740000	641	0.545455	UI_1062
chr1	220460000	220470000	chr1	220730000	220740000	15	0.000110328	0.00357143	220440000	220480000	220630000	220740000	641	0.545455	UI_1063
chr1	940000	950000	chr1	1200000	1210000	57	7.99381608497437e-31	8.32637689571168e-28	900000	980000	1150000	1220000	468	0.410714	UI_1064
chr1	970000	980000	chr1	1200000	1210000	27	4.70936196870346e-13	8.19369072660964e-11	900000	980000	1150000	1220000	468	0.410714	UI_1065
chr1	950000	960000	chr1	1160000	1170000	22	4.92600972312248e-09	4.46850106550078e-07	900000	980000	1150000	1220000	468	0.410714	UI_1066
chr1	900000	910000	chr1	1200000	1210000	17	2.14061630233203e-07	1.39735470821809e-05	900000	980000	1150000	1220000	468	0.410714	UI_1067
chr1	19230000	19240000	chr1	19400000	19410000	55	6.0838273456828e-33	7.38816621782457e-30	19210000	19290000	19360000	19410000	744	0.575	UI_1068
chr1	19270000	19280000	chr1	19400000	19410000	71	3.39437865334534e-30	3.37832342552176e-27	19210000	19290000	19360000	19410000	744	0.575	UI_1069
chr1	19240000	19250000	chr1	19360000	19370000	33	3.27865815605684e-10	3.67265892752579e-08	19210000	19290000	19360000	19410000	744	0.575	UI_1070
chr1	23420000	23430000	chr1	23510000	23520000	180	3.84719681743252e-88	6.74531666890056e-84	23390000	23450000	23460000	23560000	1763	0.383333	UI_1071
chr1	23420000	23430000	chr1	23540000	23550000	40	4.78142050479976e-11	6.15632324936319e-09	23390000	23450000	23460000	23560000	1763	0.383333	UI_1072
chr1	23420000	23430000	chr1	23480000	23490000	75	5.44396126844745e-09	4.89887440912931e-07	23390000	23450000	23460000	23560000	1763	0.383333	UI_1073
chr1	23390000	23400000	chr1	23520000	23530000	43	0.000176234	0.00533761	23390000	23450000	23460000	23560000	1763	0.383333	UI_1074
chr1	32130000	32140000	chr1	32220000	32230000	76	2.02282048688154e-22	1.03183159404406e-19	32080000	32140000	32210000	32270000	811	0.611111	UI_1075
chr1	32130000	32140000	chr1	32250000	32260000	44	1.45371590438911e-17	4.46594520496843e-15	32080000	32140000	32210000	32270000	811	0.611111	UI_1076
chr1	32100000	32110000	chr1	32220000	32230000	40	3.86345337802803e-09	3.57312208297944e-07	32080000	32140000	32210000	32270000	811	0.611111	UI_1077
chr1	32100000	32110000	chr1	32250000	32260000	21	5.242796066854e-06	0.000247348	32080000	32140000	32210000	32270000	811	0.611111	UI_1078
chr1	39560000	39570000	chr1	39850000	39860000	35	1.13036262254156e-18	3.93139171748986e-16	39550000	39600000	39790000	39890000	472	0.44	UI_1079
chr1	39560000	39570000	chr1	39800000	39810000	30	3.52908080324339e-10	3.93200747901765e-08	39550000	39600000	39790000	39890000	472	0.44	UI_1080
chr1	39560000	39570000	chr1	39880000	39890000	17	2.77011217741566e-05	0.00107429	39550000	39600000	39790000	39890000	472	0.44	UI_1081
chr1	39590000	39600000	chr1	39860000	39870000	15	0.000128059	0.0040596	39550000	39600000	39790000	39890000	472	0.44	UI_1082
chr1	42130000	42140000	chr1	42230000	42240000	34	9.001412330973e-12	1.29674510206863e-09	42090000	42150000	42180000	42250000	560	0.547619	UI_1083
chr1	42120000	42130000	chr1	42200000	42210000	34	6.50514755568972e-08	4.73386895240397e-06	42090000	42150000	42180000	42250000	560	0.547619	UI_1084
chr1	42090000	42100000	chr1	42210000	42220000	21	4.13954988769389e-06	0.000200465	42090000	42150000	42180000	42250000	560	0.547619	UI_1085
chr1	59830000	59840000	chr1	60150000	60160000	31	5.70801855542111e-18	1.83449246437347e-15	59820000	59920000	60150000	60200000	389	0.52	UI_1086
chr1	59860000	59870000	chr1	60150000	60160000	19	1.94056499669847e-09	1.89821255344615e-07	59820000	59920000	60150000	60200000	389	0.52	UI_1087
chr1	59890000	59900000	chr1	60150000	60160000	21	5.67204890703521e-08	4.17893697882779e-06	59820000	59920000	60150000	60200000	389	0.52	UI_1088
chr1	59870000	59880000	chr1	60190000	60200000	14	1.19237222122773e-05	0.000512193	59820000	59920000	60150000	60200000	389	0.52	UI_1089
chr1	155930000	155940000	chr1	155950000	155960000	302	1.98502647978815e-51	7.38698664783882e-48	155900000	155960000	155920000	156000000	2222	0.458333	UI_1090
chr1	155900000	155910000	chr1	155950000	155960000	143	1.90186370423296e-30	1.92826470509987e-27	155900000	155960000	155920000	156000000	2222	0.458333	UI_1091
chr1	155900000	155910000	chr1	155980000	155990000	53	2.23418232055601e-13	4.06639736525402e-11	155900000	155960000	155920000	156000000	2222	0.458333	UI_1092
chr1	155900000	155910000	chr1	155920000	155930000	98	1.43794031302775e-07	9.73676081594298e-06	155900000	155960000	155920000	156000000	2222	0.458333	UI_1093
chr1	155930000	155940000	chr1	155980000	155990000	53	2.2922342216956e-06	0.000118177	155900000	155960000	155920000	156000000	2222	0.458333	UI_1094
chr1	183240000	183250000	chr1	183570000	183580000	47	4.38336375022386e-21	1.95924562216689e-18	183230000	183260000	183480000	183610000	585	0.564103	UI_1095
chr1	183240000	183250000	chr1	183530000	183540000	39	8.38322790821773e-16	2.09088192274585e-13	183230000	183260000	183480000	183610000	585	0.564103	UI_1096
chr1	183240000	183250000	chr1	183600000	183610000	31	3.68656228860333e-14	7.46976693038161e-12	183230000	183260000	183480000	183610000	585	0.564103	UI_1097
chr1	183240000	183250000	chr1	183480000	183490000	32	6.70853601207132e-12	9.85440625709691e-10	183230000	183260000	183480000	183610000	585	0.564103	UI_1098
chr1	203320000	203330000	chr1	203660000	203670000	61	2.62912104372127e-32	3.03889568479612e-29	203300000	203360000	203630000	203720000	673	0.407407	UI_1099
chr1	203320000	203330000	chr1	203630000	203640000	48	8.30323034948073e-19	2.93267979073731e-16	203300000	203360000	203630000	203720000	673	0.407407	UI_1100
chr1	203320000	203330000	chr1	203700000	203710000	28	9.43934533830912e-10	9.76329719259733e-08	203300000	203360000	203630000	203720000	673	0.407407	UI_1101
chr1	203350000	203360000	chr1	203650000	203660000	19	8.35076752187693e-06	0.000373907	203300000	203360000	203630000	203720000	673	0.407407	UI_1102
chr1	234630000	234640000	chr1	234740000	234750000	155	4.08833565017265e-44	1.00518282695008e-40	234610000	234700000	234720000	234770000	1659	0.488889	UI_1103
chr1	234660000	234670000	chr1	234740000	234750000	124	2.88926767596668e-15	6.75259270759668e-13	234610000	234700000	234720000	234770000	1659	0.488889	UI_1104
chr1	234690000	234700000	chr1	234720000	234730000	44	0.000123905	0.00394596	234610000	234700000	234720000	234770000	1659	0.488889	UI_1105
chr1	235110000	235120000	chr1	235240000	235250000	252	2.16189235440472e-105	6.68260421267153e-101	235090000	235170000	235240000	235280000	1868	0.6875	UI_1106
chr1	235150000	235160000	chr1	235240000	235250000	112	1.16850202480574e-25	8.00905545862959e-23	235090000	235170000	235240000	235280000	1868	0.6875	UI_1107
chr1	235110000	235120000	chr1	235270000	235280000	58	1.1846338941973e-11	1.67644004121281e-09	235090000	235170000	235240000	235280000	1868	0.6875	UI_1108
chr1	1050000	1060000	chr1	1200000	1210000	41	3.45009610158576e-20	1.40483405250092e-17	990000	1110000	1150000	1220000	521	0.285714	UI_1109
chr1	1050000	1060000	chr1	1160000	1170000	32	3.73389916056333e-18	1.22469006847646e-15	990000	1110000	1150000	1220000	521	0.285714	UI_1110
chr1	1000000	1010000	chr1	1200000	1210000	26	2.09906026587542e-10	2.42968577046076e-08	990000	1110000	1150000	1220000	521	0.285714	UI_1111
chr1	1090000	1100000	chr1	1200000	1210000	33	2.42144683032837e-09	2.32603044209277e-07	990000	1110000	1150000	1220000	521	0.285714	UI_1112
chr1	12460000	12470000	chr1	12540000	12550000	107	5.37759589504177e-25	3.48065317380572e-22	12460000	12520000	12500000	12560000	1874	0.583333	UI_1113
chr1	12500000	12510000	chr1	12540000	12550000	115	1.34389171340907e-10	1.60723185403729e-08	12460000	12520000	12500000	12560000	1874	0.583333	UI_1114
chr1	12460000	12470000	chr1	12510000	12520000	83	7.88725255943717e-09	6.88633376577555e-07	12460000	12520000	12500000	12560000	1874	0.583333	UI_1115
chr1	22430000	22440000	chr1	22710000	22720000	33	9.30902915490627e-19	3.26914030421071e-16	22420000	22500000	22700000	22760000	397	0.4375	UI_1116
chr1	22460000	22470000	chr1	22710000	22720000	28	3.05995898196155e-15	7.13032978016987e-13	22420000	22500000	22700000	22760000	397	0.4375	UI_1117
chr1	22430000	22440000	chr1	22740000	22750000	18	4.44867950701591e-10	4.86840332140369e-08	22420000	22500000	22700000	22760000	397	0.4375	UI_1118
chr1	22490000	22500000	chr1	22710000	22720000	25	1.870150462099e-07	1.23618400739354e-05	22420000	22500000	22700000	22760000	397	0.4375	UI_1119
chr1	22470000	22480000	chr1	22740000	22750000	12	3.46510777512144e-06	0.000171058	22420000	22500000	22700000	22760000	397	0.4375	UI_1120
chr1	27740000	27750000	chr1	27990000	28000000	26	4.85064893987646e-11	6.23869891812935e-09	27660000	27770000	27960000	28000000	370	0.477273	UI_1121
chr1	27690000	27700000	chr1	27980000	27990000	22	1.05211718662284e-08	8.96590887548391e-07	27660000	27770000	27960000	28000000	370	0.477273	UI_1122
chr1	27740000	27750000	chr1	27960000	27970000	20	2.25068220179575e-07	1.4622196770199e-05	27660000	27770000	27960000	28000000	370	0.477273	UI_1123
chr1	27660000	27670000	chr1	27980000	27990000	13	2.54036762679131e-05	0.000995671	27660000	27770000	27960000	28000000	370	0.477273	UI_1124
chr1	36030000	36040000	chr1	36180000	36190000	81	2.51967960844853e-51	9.3279358938213e-48	36020000	36090000	36170000	36250000	580	0.392857	UI_1125
chr1	36030000	36040000	chr1	36230000	36240000	39	1.58446411223717e-23	8.96430184521998e-21	36020000	36090000	36170000	36250000	580	0.392857	UI_1126
chr1	36060000	36070000	chr1	36180000	36190000	35	6.41485982179539e-14	1.25860888903141e-11	36020000	36090000	36170000	36250000	580	0.392857	UI_1127
chr1	45270000	45280000	chr1	45470000	45480000	69	2.70255368277576e-27	2.13142662609838e-24	45240000	45310000	45410000	45490000	661	0.464286	UI_1128
chr1	45300000	45310000	chr1	45470000	45480000	44	1.2048172615059e-23	6.88965825823373e-21	45240000	45310000	45410000	45490000	661	0.464286	UI_1129
chr1	45270000	45280000	chr1	45420000	45430000	47	2.02888209035137e-13	3.71390674243542e-11	45240000	45310000	45410000	45490000	661	0.464286	UI_1130
chr1	45240000	45250000	chr1	45450000	45460000	17	1.40010610256962e-05	0.000590126	45240000	45310000	45410000	45490000	661	0.464286	UI_1131
chr1	54580000	54590000	chr1	54950000	54960000	44	4.58972165828571e-34	6.0223116878286e-31	54510000	54640000	54930000	54980000	403	0.338462	UI_1132
chr1	54520000	54530000	chr1	54950000	54960000	27	6.0228121908485e-15	1.35220547693645e-12	54510000	54640000	54930000	54980000	403	0.338462	UI_1133
chr1	54620000	54630000	chr1	54950000	54960000	18	4.90694025741766e-09	4.452486683986e-07	54510000	54640000	54930000	54980000	403	0.338462	UI_1134
chr1	54550000	54560000	chr1	54950000	54960000	18	1.14710572507583e-08	9.70470426036698e-07	54510000	54640000	54930000	54980000	403	0.338462	UI_1135
chr1	59250000	59260000	chr1	59940000	59950000	27	3.57441453758701e-20	1.45318312818401e-17	59200000	59260000	59880000	59960000	264	0.479167	UI_1136
chr1	59220000	59230000	chr1	59940000	59950000	18	3.499524420101e-11	4.59990113819859e-09	59200000	59260000	59880000	59960000	264	0.479167	UI_1137
chr1	59240000	59250000	chr1	59880000	59890000	17	5.15119059778471e-11	6.59761393660773e-09	59200000	59260000	59880000	59960000	264	0.479167	UI_1138
chr1	59220000	59230000	chr1	59910000	59920000	12	1.76948938251299e-06	9.37131376613066e-05	59200000	59260000	59880000	59960000	264	0.479167	UI_1139
chr1	65380000	65390000	chr1	65420000	65430000	81	8.92359531770773e-11	1.09969680690978e-08	65310000	65400000	65420000	65450000	817	0.777778	UI_1140
chr1	65320000	65330000	chr1	65440000	65450000	22	1.01046041867454e-07	7.0718423071341e-06	65310000	65400000	65420000	65450000	817	0.777778	UI_1141
chr1	65350000	65360000	chr1	65430000	65440000	25	5.43259256982547e-06	0.000255294	65310000	65400000	65420000	65450000	817	0.777778	UI_1142
chr1	87790000	87800000	chr1	88350000	88360000	27	7.9096049718424e-20	3.10564211703475e-17	87790000	87820000	88320000	88460000	293	0.5	UI_1143
chr1	87790000	87800000	chr1	88420000	88430000	24	1.41789004885765e-16	3.88357353760013e-14	87790000	87820000	88320000	88460000	293	0.5	UI_1144
chr1	87790000	87800000	chr1	88390000	88400000	13	6.72551427165606e-07	3.93159694590562e-05	87790000	87820000	88320000	88460000	293	0.5	UI_1145
chr1	87800000	87810000	chr1	88320000	88330000	11	7.36393866554117e-05	0.00251731	87790000	87820000	88320000	88460000	293	0.5	UI_1146
chr1	87800000	87810000	chr1	88450000	88460000	9	0.000156307	0.0048165	87790000	87820000	88320000	88460000	293	0.5	UI_1147
chr1	113650000	113660000	chr1	114300000	114310000	24	1.12726149093289e-16	3.12573060965589e-14	113630000	113690000	114190000	114320000	301	0.346154	UI_1148
chr1	113650000	113660000	chr1	114230000	114240000	23	1.67178286948736e-16	4.54049247970259e-14	113630000	113690000	114190000	114320000	301	0.346154	UI_1149
chr1	113650000	113660000	chr1	114270000	114280000	17	2.38735452538019e-09	2.29610683925824e-07	113630000	113690000	114190000	114320000	301	0.346154	UI_1150
chr1	113650000	113660000	chr1	114190000	114200000	12	1.7689609214272e-05	0.00072506	113630000	113690000	114190000	114320000	301	0.346154	UI_1151
chr1	113680000	113690000	chr1	114300000	114310000	10	3.4244255946274e-05	0.00129264	113630000	113690000	114190000	114320000	301	0.346154	UI_1152
chr1	153510000	153520000	chr1	153530000	153540000	284	2.16660027283005e-43	5.11865751560952e-40	153470000	153530000	153510000	153610000	1703	0.566667	UI_1153
chr1	153480000	153490000	chr1	153540000	153550000	88	3.09252713252233e-25	2.04495545919334e-22	153470000	153530000	153510000	153610000	1703	0.566667	UI_1154
chr1	153480000	153490000	chr1	153580000	153590000	63	1.12110781375633e-19	4.33258930394506e-17	153470000	153530000	153510000	153610000	1703	0.566667	UI_1155
chr1	153480000	153490000	chr1	153510000	153520000	86	0.000272529	0.0077449	153470000	153530000	153510000	153610000	1703	0.566667	UI_1156
chr1	156670000	156680000	chr1	156870000	156880000	58	4.6936950389442e-22	2.31399814497349e-19	156630000	156700000	156820000	156900000	712	0.464286	UI_1157
chr1	156670000	156680000	chr1	156840000	156850000	50	1.71761502421941e-18	5.84963320399018e-16	156630000	156700000	156820000	156900000	712	0.464286	UI_1158
chr1	156630000	156640000	chr1	156860000	156870000	49	2.46978930219886e-17	7.38814124430867e-15	156630000	156700000	156820000	156900000	712	0.464286	UI_1159
chr1	163830000	163840000	chr1	164530000	164540000	17	7.0462130611438e-12	1.03185448746583e-09	163780000	163850000	164520000	164610000	250	0.380952	UI_1160
chr1	163800000	163810000	chr1	164530000	164540000	16	2.18249122468754e-09	2.11499289054718e-07	163780000	163850000	164520000	164610000	250	0.380952	UI_1161
chr1	163840000	163850000	chr1	164580000	164590000	16	1.07746818676723e-08	9.16092246089069e-07	163780000	163850000	164520000	164610000	250	0.380952	UI_1162
chr1	183000000	183010000	chr1	183200000	183210000	50	4.68429882290621e-15	1.06603501596688e-12	182990000	183050000	183150000	183220000	671	0.5	UI_1163
chr1	183040000	183050000	chr1	183200000	183210000	38	2.86818921733358e-09	2.71753235778635e-07	182990000	183050000	183150000	183220000	671	0.5	UI_1164
chr1	183000000	183010000	chr1	183160000	183170000	42	5.12954854598184e-09	4.6380694070783e-07	182990000	183050000	183150000	183220000	671	0.5	UI_1165
chr1	235040000	235050000	chr1	235240000	235250000	56	4.05741171505584e-24	2.42740483119859e-21	234960000	235070000	235240000	235270000	672	0.636364	UI_1166
chr1	234990000	235000000	chr1	235240000	235250000	43	1.19675549617532e-17	3.71096978154892e-15	234960000	235070000	235240000	235270000	672	0.636364	UI_1167
chr1	234960000	234970000	chr1	235240000	235250000	23	3.84914409198823e-05	0.00143171	234960000	235070000	235240000	235270000	672	0.636364	UI_1168
chr1	10570000	10580000	chr1	10930000	10940000	30	1.7485521113474e-18	5.94817607564363e-16	10550000	10590000	10880000	10980000	309	0.525	UI_1169
chr1	10560000	10570000	chr1	10880000	10890000	15	6.09629498455487e-08	4.46291272271821e-06	10550000	10590000	10880000	10980000	309	0.525	UI_1170
chr1	10550000	10560000	chr1	10970000	10980000	12	1.59778592155343e-05	0.000663058	10550000	10590000	10880000	10980000	309	0.525	UI_1171
chr1	21580000	21590000	chr1	21890000	21900000	31	1.12882369850558e-13	2.14101395896244e-11	21540000	21590000	21860000	21930000	364	0.571429	UI_1172
chr1	21580000	21590000	chr1	21920000	21930000	23	1.17111522584791e-08	9.89194428433063e-07	21540000	21590000	21860000	21930000	364	0.571429	UI_1173
chr1	21550000	21560000	chr1	21910000	21920000	18	1.22291888661133e-08	1.02953710560823e-06	21540000	21590000	21860000	21930000	364	0.571429	UI_1174
chr1	21560000	21570000	chr1	21860000	21870000	19	7.21903502232588e-07	4.19066550357138e-05	21540000	21590000	21860000	21930000	364	0.571429	UI_1175
chr1	45470000	45480000	chr1	45760000	45770000	52	1.2366521347541e-39	2.34465649448011e-36	45460000	45510000	45730000	45830000	467	0.42	UI_1176
chr1	45470000	45480000	chr1	45800000	45810000	28	2.76306199017724e-16	7.31253668009696e-14	45460000	45510000	45730000	45830000	467	0.42	UI_1177
chr1	45500000	45510000	chr1	45760000	45770000	20	7.7490395784671e-09	6.77506283375814e-07	45460000	45510000	45730000	45830000	467	0.42	UI_1178
chr1	45470000	45480000	chr1	45730000	45740000	20	1.23544031484582e-08	1.03924295187389e-06	45460000	45510000	45730000	45830000	467	0.42	UI_1179
chr1	68030000	68040000	chr1	68150000	68160000	73	2.0805028672915e-28	1.80070696869594e-25	67990000	68060000	68130000	68180000	860	0.571429	UI_1180
chr1	68000000	68010000	chr1	68150000	68160000	47	2.59640135780421e-21	1.19011524890711e-18	67990000	68060000	68130000	68180000	860	0.571429	UI_1181
chr1	155220000	155230000	chr1	155560000	155570000	24	2.25365885431645e-13	4.10017165247463e-11	155190000	155250000	155520000	155580000	347	0.583333	UI_1182
chr1	155190000	155200000	chr1	155570000	155580000	19	8.61085165161918e-08	6.11136083053621e-06	155190000	155250000	155520000	155580000	347	0.583333	UI_1183
chr1	155230000	155240000	chr1	155530000	155540000	18	4.52369759828473e-06	0.000216899	155190000	155250000	155520000	155580000	347	0.583333	UI_1184
chr1	156070000	156080000	chr1	156090000	156100000	797	1.22317358265328e-111	4.63902547955072e-107	156040000	156100000	156070000	156140000	3860	0.47619	UI_1185
chr1	156070000	156080000	chr1	156120000	156130000	117	5.19152397466256e-14	1.031914841027e-11	156040000	156100000	156070000	156140000	3860	0.47619	UI_1186
chr1	156040000	156050000	chr1	156090000	156100000	75	6.31438901823198e-08	4.60715198281546e-06	156040000	156100000	156070000	156140000	3860	0.47619	UI_1187
chr1	162600000	162610000	chr1	162640000	162650000	171	3.11222588162641e-26	2.24721787110762e-23	162580000	162620000	162630000	162700000	1482	0.714286	UI_1188
chr1	162600000	162610000	chr1	162680000	162690000	84	2.47454556716902e-25	1.64977499455867e-22	162580000	162620000	162630000	162700000	1482	0.714286	UI_1189
chr1	214620000	214630000	chr1	214720000	214730000	72	6.58411025725545e-23	3.51230443754358e-20	214590000	214630000	214710000	214780000	701	0.714286	UI_1190
chr1	214590000	214600000	chr1	214720000	214730000	56	8.53906551746806e-20	3.33906527836605e-17	214590000	214630000	214710000	214780000	701	0.714286	UI_1191
chr1	214610000	214620000	chr1	214750000	214760000	41	1.28736289442689e-15	3.14386746941737e-13	214590000	214630000	214710000	214780000	701	0.714286	UI_1192
chr1	221910000	221920000	chr1	222210000	222220000	45	6.48678103507776e-24	3.8094244946461e-21	221860000	221930000	222210000	222270000	385	0.47619	UI_1193
chr1	221910000	221920000	chr1	222240000	222250000	28	3.45896548175613e-16	9.05079776127727e-14	221860000	221930000	222210000	222270000	385	0.47619	UI_1194
chr1	221880000	221890000	chr1	222210000	222220000	21	2.05550848873496e-08	1.65591569935251e-06	221860000	221930000	222210000	222270000	385	0.47619	UI_1195
chr1	226840000	226850000	chr1	226920000	226930000	89	4.0048976224141e-22	1.98973702392855e-19	226820000	226870000	226880000	226940000	1236	0.666667	UI_1196
chr1	226840000	226850000	chr1	226880000	226890000	102	1.84764225416013e-15	4.42225617158114e-13	226820000	226870000	226880000	226940000	1236	0.666667	UI_1197
chr1	245310000	245320000	chr1	246160000	246170000	44	3.63147552604815e-44	8.95326310854667e-41	245300000	245350000	246100000	246200000	339	0.4	UI_1198
chr1	245310000	245320000	chr1	246130000	246140000	20	1.80452323104604e-15	4.32544125462991e-13	245300000	245350000	246100000	246200000	339	0.4	UI_1199
chr1	245310000	245320000	chr1	246190000	246200000	9	4.10830384883611e-05	0.00151569	245300000	245350000	246100000	246200000	339	0.4	UI_1200
chr1	245310000	245320000	chr1	246100000	246110000	10	4.9833182649462e-05	0.00179382	245300000	245350000	246100000	246200000	339	0.4	UI_1201
chr1	245340000	245350000	chr1	246140000	246150000	9	0.00020788	0.00614818	245300000	245350000	246100000	246200000	339	0.4	UI_1202
chr1	3440000	3450000	chr1	3460000	3470000	333	2.26496266362969e-35	3.25724959810376e-32	3380000	3460000	3430000	3480000	1548	0.475	UI_1203
chr1	3400000	3410000	chr1	3460000	3470000	64	1.79180160766433e-18	6.087942812074e-16	3380000	3460000	3430000	3480000	1548	0.475	UI_1204
chr1	3410000	3420000	chr1	3430000	3440000	55	0.000296649	0.00832321	3380000	3460000	3430000	3480000	1548	0.475	UI_1205
chr1	15650000	15660000	chr1	15730000	15740000	56	3.13642418290476e-19	1.15862793938677e-16	15630000	15700000	15730000	15770000	702	0.678571	UI_1206
chr1	15680000	15690000	chr1	15730000	15740000	82	3.02987750822845e-15	7.06315767332216e-13	15630000	15700000	15730000	15770000	702	0.678571	UI_1207
chr1	15660000	15670000	chr1	15760000	15770000	24	9.72957508627665e-08	6.83360996050879e-06	15630000	15700000	15730000	15770000	702	0.678571	UI_1208
chr1	17890000	17900000	chr1	17910000	17920000	240	1.25717115489937e-27	1.0186879108332e-24	17810000	17900000	17880000	17930000	1349	0.488889	UI_1209
chr1	17860000	17870000	chr1	17890000	17900000	129	3.78232024010804e-15	8.70846584152175e-13	17810000	17900000	17880000	17930000	1349	0.488889	UI_1210
chr1	17860000	17870000	chr1	17920000	17930000	42	2.52439198545476e-10	2.8831521977633e-08	17810000	17900000	17880000	17930000	1349	0.488889	UI_1211
chr1	17830000	17840000	chr1	17910000	17920000	60	7.5967689493055e-09	6.65237242044308e-07	17810000	17900000	17880000	17930000	1349	0.488889	UI_1212
chr1	33790000	33800000	chr1	33810000	33820000	215	1.53960770399165e-20	6.49996810749449e-18	33760000	33810000	33800000	33860000	1493	0.633333	UI_1213
chr1	33760000	33770000	chr1	33830000	33840000	44	6.37378853466404e-13	1.08845366635041e-10	33760000	33810000	33800000	33860000	1493	0.633333	UI_1214
chr1	33790000	33800000	chr1	33850000	33860000	94	8.56764640400111e-13	1.43568275638031e-10	33760000	33810000	33800000	33860000	1493	0.633333	UI_1215
chr1	33760000	33770000	chr1	33800000	33810000	83	2.03734136662054e-10	2.36320727286471e-08	33760000	33810000	33800000	33860000	1493	0.633333	UI_1216
chr1	113040000	113050000	chr1	113160000	113170000	77	3.58217692961515e-33	4.42606266135235e-30	112980000	113090000	113140000	113190000	715	0.418182	UI_1217
chr1	113000000	113010000	chr1	113160000	113170000	54	3.08688458767449e-21	1.40273460270767e-18	112980000	113090000	113140000	113190000	715	0.418182	UI_1218
chr1	113080000	113090000	chr1	113160000	113170000	61	2.36561336870617e-12	3.71494631287158e-10	112980000	113090000	113140000	113190000	715	0.418182	UI_1219
chr1	162820000	162830000	chr1	163130000	163140000	43	1.70131751459538e-29	1.60090475498945e-26	162810000	162890000	163130000	163180000	393	0.5	UI_1220
chr1	162850000	162860000	chr1	163140000	163150000	27	1.4842920735439e-17	4.55438347050398e-15	162810000	162890000	163130000	163180000	393	0.5	UI_1221
chr1	162820000	162830000	chr1	163160000	163170000	19	3.28366002568093e-08	2.5390817166744e-06	162810000	162890000	163130000	163180000	393	0.5	UI_1222
chr1	162880000	162890000	chr1	163130000	163140000	15	4.40672693868491e-05	0.00161174	162810000	162890000	163130000	163180000	393	0.5	UI_1223
chr1	180470000	180480000	chr1	181100000	181110000	22	1.74660833699419e-13	3.22681527040132e-11	180470000	180510000	181040000	181150000	243	0.522727	UI_1224
chr1	180470000	180480000	chr1	181050000	181060000	17	2.83561887614098e-09	2.68934118479143e-07	180470000	180510000	181040000	181150000	243	0.522727	UI_1225
chr1	180500000	180510000	chr1	181100000	181110000	12	7.44379615785885e-06	0.000337753	180470000	180510000	181040000	181150000	243	0.522727	UI_1226
chr1	180470000	180480000	chr1	181130000	181140000	11	1.70654113712806e-05	0.000702607	180470000	180510000	181040000	181150000	243	0.522727	UI_1227
chr1	181060000	181070000	chr1	181100000	181110000	258	1.87819227922896e-65	1.37586229283738e-61	181030000	181090000	181080000	181130000	2396	0.633333	UI_1228
chr1	181030000	181040000	chr1	181100000	181110000	96	7.87728865009254e-26	5.48103291954899e-23	181030000	181090000	181080000	181130000	2396	0.633333	UI_1229
chr1	200270000	200280000	chr1	200450000	200460000	40	1.59625382727945e-19	6.07660054757502e-17	200230000	200290000	200370000	200460000	494	0.351852	UI_1230
chr1	200260000	200270000	chr1	200380000	200390000	37	6.85574430988319e-13	1.16525013241513e-10	200230000	200290000	200370000	200460000	494	0.351852	UI_1231
chr1	200230000	200240000	chr1	200450000	200460000	18	4.68015963326903e-08	3.50860148778032e-06	200230000	200290000	200370000	200460000	494	0.351852	UI_1232
chr1	200270000	200280000	chr1	200420000	200430000	24	6.92861479226729e-08	5.01320751784615e-06	200230000	200290000	200370000	200460000	494	0.351852	UI_1233
chr1	207010000	207020000	chr1	207070000	207080000	84	2.8840061934093e-23	1.59175055669201e-20	206960000	207040000	207060000	207090000	1247	0.791667	UI_1234
chr1	206970000	206980000	chr1	207060000	207070000	76	5.77336948325692e-19	2.07358384186258e-16	206960000	207040000	207060000	207090000	1247	0.791667	UI_1235
chr1	218510000	218520000	chr1	219250000	219260000	35	1.1283868528891e-28	9.9672047193489e-26	218490000	218560000	219210000	219270000	270	0.452381	UI_1236
chr1	218510000	218520000	chr1	219210000	219220000	18	5.59400418293343e-11	7.12426164936382e-09	218490000	218560000	219210000	219270000	270	0.452381	UI_1237
chr1	218540000	218550000	chr1	219240000	219250000	16	1.29066854667846e-10	1.54830599536943e-08	218490000	218560000	219210000	219270000	270	0.452381	UI_1238
chr1	224690000	224700000	chr1	224810000	224820000	52	1.88768609755468e-17	5.72562533545734e-15	224680000	224760000	224800000	224850000	779	0.525	UI_1239
chr1	224740000	224750000	chr1	224810000	224820000	46	7.46393534791767e-10	7.85376979652896e-08	224680000	224760000	224800000	224850000	779	0.525	UI_1240
chr1	224710000	224720000	chr1	224840000	224850000	17	0.000110433	0.00357438	224680000	224760000	224800000	224850000	779	0.525	UI_1241
chr1	2140000	2150000	chr1	3460000	3470000	21	3.22631385252267e-16	8.4727156064216e-14	2110000	2200000	3430000	3480000	231	0.4	UI_1242
chr1	2180000	2190000	chr1	3460000	3470000	12	9.77498990165441e-08	6.86280316513871e-06	2110000	2200000	3430000	3480000	231	0.4	UI_1243
chr1	2110000	2120000	chr1	3460000	3470000	11	4.80653059770746e-07	2.9036919247027e-05	2110000	2200000	3430000	3480000	231	0.4	UI_1244
chr1	2130000	2140000	chr1	3430000	3440000	9	2.63023930603164e-05	0.00102661	2110000	2200000	3430000	3480000	231	0.4	UI_1245
chr1	10560000	10570000	chr1	11000000	11010000	20	5.67000740514581e-14	1.12135402724363e-11	10530000	10590000	10970000	11050000	252	0.395833	UI_1246
chr1	10570000	10580000	chr1	11030000	11040000	18	2.18230591431047e-10	2.51917292068729e-08	10530000	10590000	10970000	11050000	252	0.395833	UI_1247
chr1	10540000	10550000	chr1	11030000	11040000	15	5.34711682529609e-07	3.19661124467648e-05	10530000	10590000	10970000	11050000	252	0.395833	UI_1248
chr1	10570000	10580000	chr1	10970000	10980000	13	5.35720592692313e-06	0.000252154	10530000	10590000	10970000	11050000	252	0.395833	UI_1249
chr1	20090000	20100000	chr1	20180000	20190000	51	2.97803946176925e-13	5.32307917880999e-11	20080000	20130000	20180000	20220000	613	0.9	UI_1250
chr1	20090000	20100000	chr1	20210000	20220000	33	5.1098993103629e-10	5.53508872417483e-08	20080000	20130000	20180000	20220000	613	0.9	UI_1251
chr1	20120000	20130000	chr1	20180000	20190000	50	1.63036450977609e-09	1.61611092773075e-07	20080000	20130000	20180000	20220000	613	0.9	UI_1252
chr1	25570000	25580000	chr1	25670000	25680000	83	2.67593396824188e-31	2.89437439836058e-28	25550000	25590000	25660000	25720000	735	0.75	UI_1253
chr1	25560000	25570000	chr1	25700000	25710000	25	1.76535880836414e-07	1.17302750389353e-05	25550000	25590000	25660000	25720000	735	0.75	UI_1254
chr1	27860000	27870000	chr1	27920000	27930000	101	3.08347985869273e-24	1.8652911452067e-21	27860000	27910000	27880000	27940000	1530	0.6	UI_1255
chr1	27860000	27870000	chr1	27880000	27890000	179	1.14694565930563e-21	5.44222764016287e-19	27860000	27910000	27880000	27940000	1530	0.6	UI_1256
chr1	27900000	27910000	chr1	27920000	27930000	125	3.33179496104486e-16	8.73577999487829e-14	27860000	27910000	27880000	27940000	1530	0.6	UI_1257
chr1	32170000	32180000	chr1	32220000	32230000	163	3.11498533804186e-25	2.05904227242496e-22	32150000	32190000	32210000	32270000	1209	0.75	UI_1258
chr1	32170000	32180000	chr1	32260000	32270000	83	4.74964002307635e-14	9.48807728662948e-12	32150000	32190000	32210000	32270000	1209	0.75	UI_1259
chr1	55840000	55850000	chr1	56180000	56190000	50	1.91399868493071e-31	2.09267482550683e-28	55740000	55850000	56150000	56200000	386	0.418182	UI_1260
chr1	55750000	55760000	chr1	56180000	56190000	36	3.73809296784445e-19	1.36897504598982e-16	55740000	55850000	56150000	56200000	386	0.418182	UI_1261
chr1	55810000	55820000	chr1	56190000	56200000	16	4.31523177035231e-08	3.25823870968738e-06	55740000	55850000	56150000	56200000	386	0.418182	UI_1262
chr1	55840000	55850000	chr1	56150000	56160000	15	5.54866166140959e-06	0.000260159	55740000	55850000	56150000	56200000	386	0.418182	UI_1263
chr1	55780000	55790000	chr1	56180000	56190000	14	0.000208293	0.00615874	55740000	55850000	56150000	56200000	386	0.418182	UI_1264
chr1	64080000	64090000	chr1	64700000	64710000	30	3.78997707204453e-24	2.27338511842808e-21	64050000	64110000	64660000	64740000	250	0.375	UI_1265
chr1	64070000	64080000	chr1	64670000	64680000	17	3.03897539224717e-12	4.6961269919306e-10	64050000	64110000	64660000	64740000	250	0.375	UI_1266
chr1	64050000	64060000	chr1	64700000	64710000	16	8.33287608811509e-10	8.69750000166667e-08	64050000	64110000	64660000	64740000	250	0.375	UI_1267
chr1	64070000	64080000	chr1	64730000	64740000	8	0.000204953	0.00607415	64050000	64110000	64660000	64740000	250	0.375	UI_1268
chr1	110080000	110090000	chr1	110300000	110310000	53	5.70932372113808e-29	5.1507548883384e-26	110070000	110150000	110300000	110340000	451	0.5625	UI_1269
chr1	110120000	110130000	chr1	110300000	110310000	32	2.28491729368868e-11	3.09199512390397e-09	110070000	110150000	110300000	110340000	451	0.5625	UI_1270
chr1	110090000	110100000	chr1	110330000	110340000	26	9.73985890492415e-08	6.84024888494214e-06	110070000	110150000	110300000	110340000	451	0.5625	UI_1271
chr1	110750000	110760000	chr1	110850000	110860000	69	4.03999577643897e-39	7.43435129185966e-36	110730000	110780000	110830000	110890000	554	0.6	UI_1272
chr1	110740000	110750000	chr1	110880000	110890000	23	4.47147698339719e-08	3.36598315231591e-06	110730000	110780000	110830000	110890000	554	0.6	UI_1273
chr1	151910000	151920000	chr1	151960000	151970000	178	2.41757736143044e-47	7.14462716325083e-44	151860000	151950000	151960000	152010000	1172	0.4	UI_1274
chr1	151940000	151950000	chr1	151960000	151970000	147	6.83118578757922e-27	5.2095173031307e-24	151860000	151950000	151960000	152010000	1172	0.4	UI_1275
chr1	151860000	151870000	chr1	151960000	151970000	46	3.95382509887776e-13	6.95427162833467e-11	151860000	151950000	151960000	152010000	1172	0.4	UI_1276
chr1	151910000	151920000	chr1	152000000	152010000	29	2.22346766742826e-05	0.000885949	151860000	151950000	151960000	152010000	1172	0.4	UI_1277
chr1	161170000	161180000	chr1	161350000	161360000	54	1.22950397280613e-26	9.17318204663051e-24	161120000	161210000	161340000	161370000	585	0.666667	UI_1278
chr1	161140000	161150000	chr1	161350000	161360000	32	2.55184994456222e-10	2.91206697203255e-08	161120000	161210000	161340000	161370000	585	0.666667	UI_1279
chr1	161200000	161210000	chr1	161360000	161370000	27	6.5438134678724e-05	0.00227257	161120000	161210000	161340000	161370000	585	0.666667	UI_1280
chr1	171960000	171970000	chr1	172370000	172380000	19	8.80021517660374e-14	1.69408212950047e-11	171950000	171990000	172350000	172420000	240	0.642857	UI_1281
chr1	171960000	171970000	chr1	172410000	172420000	14	1.02490174087841e-08	8.75260538163168e-07	171950000	171990000	172350000	172420000	240	0.642857	UI_1282
chr1	180480000	180490000	chr1	180820000	180830000	19	9.60804055845528e-13	1.59927236211995e-10	180470000	180520000	180810000	180870000	273	0.633333	UI_1283
chr1	180510000	180520000	chr1	180820000	180830000	15	1.20576137565474e-08	1.01614742087512e-06	180470000	180520000	180810000	180870000	273	0.633333	UI_1284
chr1	180470000	180480000	chr1	180860000	180870000	15	2.79769188653927e-08	2.19403392992579e-06	180470000	180520000	180810000	180870000	273	0.633333	UI_1285
chr1	212840000	212850000	chr1	212870000	212880000	187	4.52566601805269e-23	2.4533821520416e-20	212830000	212860000	212870000	212970000	1117	0.6	UI_1286
chr1	212840000	212850000	chr1	212960000	212970000	71	4.35754034597886e-21	1.94868052756245e-18	212830000	212860000	212870000	212970000	1117	0.6	UI_1287
chr1	212840000	212850000	chr1	212930000	212940000	74	5.48411355260682e-21	2.42922086198637e-18	212830000	212860000	212870000	212970000	1117	0.6	UI_1288
chr1	212840000	212850000	chr1	212900000	212910000	74	3.67385947881538e-10	4.07996999457571e-08	212830000	212860000	212870000	212970000	1117	0.6	UI_1289
chr1	227980000	227990000	chr1	228130000	228140000	32	2.89748937375451e-14	5.95475629224588e-12	227940000	228000000	228110000	228150000	363	0.75	UI_1290
chr1	227940000	227950000	chr1	228120000	228130000	24	5.81798525689795e-13	9.99299046315728e-11	227940000	228000000	228110000	228150000	363	0.75	UI_1291
chr1	234630000	234640000	chr1	234850000	234860000	82	8.09650677170039e-37	1.28059054307158e-33	234610000	234700000	234830000	234870000	721	0.5	UI_1292
chr1	234660000	234670000	chr1	234850000	234860000	50	1.46684955249686e-11	2.04764125797183e-09	234610000	234700000	234830000	234870000	721	0.5	UI_1293
chr1	234690000	234700000	chr1	234850000	234860000	27	3.6348664339354e-05	0.00136196	234610000	234700000	234830000	234870000	721	0.5	UI_1294
chr1	245020000	245030000	chr1	245130000	245140000	162	3.71438344619468e-75	4.03309338385836e-71	244990000	245070000	245110000	245180000	1002	0.339286	UI_1295
chr1	244990000	245000000	chr1	245130000	245140000	51	6.67715579825829e-18	2.12900842897683e-15	244990000	245070000	245110000	245180000	1002	0.339286	UI_1296
chr1	245060000	245070000	chr1	245130000	245140000	41	3.16276216852137e-07	1.98962934525178e-05	244990000	245070000	245110000	245180000	1002	0.339286	UI_1297
chr1	245020000	245030000	chr1	245160000	245170000	37	4.47815133225188e-06	0.000214954	244990000	245070000	245110000	245180000	1002	0.339286	UI_1298
chr1	12570000	12580000	chr1	12670000	12680000	137	6.24999527486147e-31	6.55919678773729e-28	12570000	12620000	12630000	12680000	1962	0.72	UI_1299
chr1	12610000	12620000	chr1	12670000	12680000	199	1.56259961606153e-30	1.59437813975501e-27	12570000	12620000	12630000	12680000	1962	0.72	UI_1300
chr1	12610000	12620000	chr1	12630000	12640000	178	5.24458186928419e-09	4.73331745426956e-07	12570000	12620000	12630000	12680000	1962	0.72	UI_1301
chr1	21100000	21110000	chr1	21500000	21510000	30	5.29064713294556e-20	2.11372361143667e-17	21080000	21130000	21490000	21550000	257	0.566667	UI_1302
chr1	21110000	21120000	chr1	21530000	21540000	14	4.29169076666741e-07	2.62120076981131e-05	21080000	21130000	21490000	21550000	257	0.566667	UI_1303
chr1	21080000	21090000	chr1	21540000	21550000	10	0.000255626	0.0073348	21080000	21130000	21490000	21550000	257	0.566667	UI_1304
chr1	29450000	29460000	chr1	29500000	29510000	94	2.88700637522003e-15	6.74760265473662e-13	29440000	29500000	29470000	29540000	1165	0.404762	UI_1305
chr1	29450000	29460000	chr1	29470000	29480000	133	1.24004293604109e-11	1.74992050143747e-09	29440000	29500000	29470000	29540000	1165	0.404762	UI_1306
chr1	29490000	29500000	chr1	29520000	29530000	75	1.61111153607042e-07	1.07938003805194e-05	29440000	29500000	29470000	29540000	1165	0.404762	UI_1307
chr1	29440000	29450000	chr1	29530000	29540000	31	6.80725690602627e-06	0.000312008	29440000	29500000	29470000	29540000	1165	0.404762	UI_1308
chr1	36560000	36570000	chr1	36710000	36720000	40	2.47813730938082e-13	4.48120800802183e-11	36550000	36660000	36710000	36730000	689	0.772727	UI_1309
chr1	36610000	36620000	chr1	36720000	36730000	48	1.32944152621725e-11	1.86772354282734e-09	36550000	36660000	36710000	36730000	689	0.772727	UI_1310
chr1	36650000	36660000	chr1	36710000	36720000	61	5.93706537901512e-07	3.51360864341589e-05	36550000	36660000	36710000	36730000	689	0.772727	UI_1311
chr1	36570000	36580000	chr1	36870000	36880000	22	3.28730987289121e-08	2.54166506476416e-06	36550000	36620000	36830000	36900000	304	0.44898	UI_1312
chr1	36600000	36610000	chr1	36840000	36850000	21	2.20055483802113e-06	0.000113949	36550000	36620000	36830000	36900000	304	0.44898	UI_1313
chr1	36570000	36580000	chr1	36840000	36850000	22	4.73391117377872e-06	0.00022588	36550000	36620000	36830000	36900000	304	0.44898	UI_1314
chr1	53310000	53320000	chr1	53660000	53670000	24	8.14737841590755e-12	1.18122264782251e-09	53250000	53330000	53630000	53670000	274	0.53125	UI_1315
chr1	53280000	53290000	chr1	53660000	53670000	21	7.42370032446756e-08	5.33877660868056e-06	53250000	53330000	53630000	53670000	274	0.53125	UI_1316
chr1	53250000	53260000	chr1	53660000	53670000	15	5.50802498218098e-05	0.0019568	53250000	53330000	53630000	53670000	274	0.53125	UI_1317
chr1	53310000	53320000	chr1	53630000	53640000	12	0.000230938	0.00672578	53250000	53330000	53630000	53670000	274	0.53125	UI_1318
chr1	59250000	59260000	chr1	60030000	60040000	24	1.26542827317981e-17	3.91358887147101e-15	59200000	59290000	60010000	60070000	240	0.388889	UI_1319
chr1	59210000	59220000	chr1	60060000	60070000	19	5.87100747057776e-14	1.15840669146968e-11	59200000	59290000	60010000	60070000	240	0.388889	UI_1320
chr1	59220000	59230000	chr1	60030000	60040000	17	1.13356652097412e-10	1.37282890353621e-08	59200000	59290000	60010000	60070000	240	0.388889	UI_1321
chr1	59280000	59290000	chr1	60030000	60040000	17	3.19887981729371e-10	3.59058917061467e-08	59200000	59290000	60010000	60070000	240	0.388889	UI_1322
chr1	68580000	68590000	chr1	68790000	68800000	28	7.04273731780456e-15	1.56812439032224e-12	68570000	68620000	68770000	68860000	328	0.4	UI_1323
chr1	68610000	68620000	chr1	68780000	68790000	26	1.36723430348215e-06	7.43780857678331e-05	68570000	68620000	68770000	68860000	328	0.4	UI_1324
chr1	68580000	68590000	chr1	68850000	68860000	13	1.55564760160254e-06	8.35074350977014e-05	68570000	68620000	68770000	68860000	328	0.4	UI_1325
chr1	68570000	68580000	chr1	68820000	68830000	13	4.90231902543738e-05	0.00176858	68570000	68620000	68770000	68860000	328	0.4	UI_1326
chr1	93900000	93910000	chr1	94080000	94090000	42	1.39406578950577e-18	4.79845951277034e-16	93890000	93940000	94030000	94110000	461	0.425	UI_1327
chr1	93900000	93910000	chr1	94030000	94040000	38	4.61332684599603e-17	1.3392048451577e-14	93890000	93940000	94030000	94110000	461	0.425	UI_1328
chr1	93930000	93940000	chr1	94080000	94090000	23	9.13009953589712e-06	0.000404712	93890000	93940000	94030000	94110000	461	0.425	UI_1329
chr1	110080000	110090000	chr1	110170000	110180000	71	6.89890172200324e-32	7.77174431513807e-29	110070000	110110000	110150000	110200000	1048	0.85	UI_1330
chr1	110190000	110200000	chr1	110520000	110530000	37	9.36043954144552e-20	3.64638539032457e-17	110150000	110220000	110510000	110550000	399	0.607143	UI_1331
chr1	110160000	110170000	chr1	110520000	110530000	31	2.22968390550048e-13	4.05883152774487e-11	110150000	110220000	110510000	110550000	399	0.607143	UI_1332
chr1	110740000	110750000	chr1	110950000	110960000	35	1.51480864002419e-20	6.40007069295441e-18	110730000	110760000	110920000	111020000	348	0.566667	UI_1333
chr1	110730000	110740000	chr1	111000000	111010000	22	1.47968176376121e-13	2.76253377242075e-11	110730000	110760000	110920000	111020000	348	0.566667	UI_1334
chr1	110730000	110740000	chr1	110920000	110930000	18	0.000300211	0.00840803	110730000	110760000	110920000	111020000	348	0.566667	UI_1335
chr1	116710000	116720000	chr1	117030000	117040000	30	3.35486486468166e-19	1.23556669299336e-16	116650000	116720000	117020000	117060000	254	0.642857	UI_1336
chr1	116670000	116680000	chr1	117040000	117050000	27	2.20849241099501e-15	5.23625134591464e-13	116650000	116720000	117020000	117060000	254	0.642857	UI_1337
chr1	150550000	150560000	chr1	150580000	150590000	284	2.05727128591205e-63	1.36189757802471e-59	150510000	150570000	150540000	150610000	2569	0.404762	UI_1338
chr1	150520000	150530000	chr1	150580000	150590000	129	9.30702343027609e-19	3.26854325851556e-16	150510000	150570000	150540000	150610000	2569	0.404762	UI_1339
chr1	150520000	150530000	chr1	150540000	150550000	150	1.50784629464734e-05	0.000630076	150510000	150570000	150540000	150610000	2569	0.404762	UI_1340
chr1	162820000	162830000	chr1	163280000	163290000	42	6.46611652395995e-33	7.83728789616883e-30	162810000	162880000	163260000	163310000	286	0.485714	UI_1341
chr1	162870000	162880000	chr1	163270000	163280000	25	1.68574214616504e-15	4.05626849371944e-13	162810000	162880000	163260000	163310000	286	0.485714	UI_1342
chr1	170270000	170280000	chr1	170640000	170650000	34	1.35977482326628e-13	2.55037890256606e-11	170260000	170340000	170630000	170720000	355	0.236111	UI_1343
chr1	170270000	170280000	chr1	170670000	170680000	24	5.47939913857824e-11	6.98812514085763e-09	170260000	170340000	170630000	170720000	355	0.236111	UI_1344
chr1	170310000	170320000	chr1	170630000	170640000	28	7.19746039661344e-11	9.00430457378791e-09	170260000	170340000	170630000	170720000	355	0.236111	UI_1345
chr1	170270000	170280000	chr1	170700000	170710000	15	1.509798868866e-06	8.12881134678139e-05	170260000	170340000	170630000	170720000	355	0.236111	UI_1346
chr1	172790000	172800000	chr1	173160000	173170000	45	1.27197679475083e-35	1.8561891935965e-32	172780000	172830000	173150000	173200000	312	0.68	UI_1347
chr1	172800000	172810000	chr1	173190000	173200000	16	2.16372309196723e-07	1.41088834465073e-05	172780000	172830000	173150000	173200000	312	0.68	UI_1348
chr1	172820000	172830000	chr1	173160000	173170000	10	0.000305671	0.00853872	172780000	172830000	173150000	173200000	312	0.68	UI_1349
chr1	172790000	172800000	chr1	172900000	172910000	59	2.16146430944445e-14	4.51808477531361e-12	172790000	172830000	172870000	172940000	811	0.607143	UI_1350
chr1	172790000	172800000	chr1	172870000	172880000	68	7.81451229609002e-13	1.31715684211618e-10	172790000	172830000	172870000	172940000	811	0.607143	UI_1351
chr1	172820000	172830000	chr1	172870000	172880000	62	4.03008596066296e-11	5.24954784903547e-09	172790000	172830000	172870000	172940000	811	0.607143	UI_1352
chr1	172790000	172800000	chr1	172930000	172940000	26	1.11138883217102e-06	6.17814025184941e-05	172790000	172830000	172870000	172940000	811	0.607143	UI_1353
chr1	172820000	172830000	chr1	172920000	172930000	24	6.83482468102836e-05	0.00235975	172790000	172830000	172870000	172940000	811	0.607143	UI_1354
chr1	201970000	201980000	chr1	202080000	202090000	47	5.02312452249606e-24	2.9806469565864e-21	201950000	202000000	202070000	202120000	494	0.72	UI_1355
chr1	201970000	201980000	chr1	202110000	202120000	25	7.69376474531088e-09	6.7308072013477e-07	201950000	202000000	202070000	202120000	494	0.72	UI_1356
chr1	202470000	202480000	chr1	202560000	202570000	70	6.21876858894712e-32	7.02702585176827e-29	202460000	202490000	202520000	202620000	638	0.566667	UI_1357
chr1	202470000	202480000	chr1	202530000	202540000	43	3.89431262421287e-11	5.08333963968122e-09	202460000	202490000	202520000	202620000	638	0.566667	UI_1358
chr1	202470000	202480000	chr1	202590000	202600000	23	7.10723945888115e-09	6.25859572001917e-07	202460000	202490000	202520000	202620000	638	0.566667	UI_1359
chr1	223900000	223910000	chr1	223930000	223940000	127	8.42195061472851e-20	3.29579986827761e-17	223880000	223920000	223910000	223970000	1424	0.708333	UI_1360
chr1	223890000	223900000	chr1	223960000	223970000	46	7.67279368087422e-06	0.000346942	223880000	223920000	223910000	223970000	1424	0.708333	UI_1361
chr1	236060000	236070000	chr1	236150000	236160000	69	4.07998416264544e-11	5.30937160095502e-09	236060000	236110000	236130000	236190000	1228	0.6	UI_1362
chr1	236070000	236080000	chr1	236180000	236190000	48	2.31547680222166e-06	0.00011925	236060000	236110000	236130000	236190000	1228	0.6	UI_1363
chr1	236100000	236110000	chr1	236130000	236140000	139	2.05903567210673e-05	0.000828383	236060000	236110000	236130000	236190000	1228	0.6	UI_1364
chr1	240190000	240200000	chr1	240310000	240320000	64	5.7662404678935e-28	4.80790002319181e-25	240180000	240210000	240240000	240360000	657	0.472222	UI_1365
chr1	240190000	240200000	chr1	240250000	240260000	82	7.28703078332523e-24	4.25322241851987e-21	240180000	240210000	240240000	240360000	657	0.472222	UI_1366
chr1	240190000	240200000	chr1	240350000	240360000	32	1.50326456106157e-12	2.43217854321343e-10	240180000	240210000	240240000	240360000	657	0.472222	UI_1367
chr1	240190000	240200000	chr1	240280000	240290000	28	2.8360023271475e-06	0.000143071	240180000	240210000	240240000	240360000	657	0.472222	UI_1368
chr1	9260000	9270000	chr1	9290000	9300000	137	3.67951230547318e-19	1.34849114152596e-16	9200000	9280000	9290000	9320000	1005	0.666667	UI_1369
chr1	9220000	9230000	chr1	9290000	9300000	64	1.69723834773844e-08	1.39012529132014e-06	9200000	9280000	9290000	9320000	1005	0.666667	UI_1370
chr1	40280000	40290000	chr1	40420000	40430000	31	1.06011112167632e-13	2.01867157807947e-11	40260000	40300000	40400000	40510000	374	0.363636	UI_1371
chr1	40280000	40290000	chr1	40500000	40510000	29	5.13327852802492e-12	7.6746388924644e-10	40260000	40300000	40400000	40510000	374	0.363636	UI_1372
chr1	40280000	40290000	chr1	40470000	40480000	22	1.46836188170018e-06	7.92742268277307e-05	40260000	40300000	40400000	40510000	374	0.363636	UI_1373
chr1	59360000	59370000	chr1	59490000	59500000	42	2.20854240481784e-11	2.99614912906636e-09	59360000	59400000	59470000	59530000	496	0.666667	UI_1374
chr1	59390000	59400000	chr1	59480000	59490000	44	3.23613397644718e-09	3.03741230665882e-07	59360000	59400000	59470000	59530000	496	0.666667	UI_1375
chr1	59390000	59400000	chr1	59520000	59530000	28	2.03120928368236e-05	0.000818725	59360000	59400000	59470000	59530000	496	0.666667	UI_1376
chr1	112930000	112940000	chr1	113240000	113250000	46	6.26265668773174e-27	4.79354401003659e-24	112930000	112970000	113200000	113270000	406	0.571429	UI_1377
chr1	112930000	112940000	chr1	113210000	113220000	25	1.07982043352444e-10	1.31259479066414e-08	112930000	112970000	113200000	113270000	406	0.571429	UI_1378
chr1	112960000	112970000	chr1	113240000	113250000	18	8.95583391297281e-07	5.08902937049667e-05	112930000	112970000	113200000	113270000	406	0.571429	UI_1379
chr1	150460000	150470000	chr1	150520000	150530000	66	4.20184264968027e-16	1.0865170052771e-13	150430000	150470000	150480000	150550000	766	0.571429	UI_1380
chr1	150460000	150470000	chr1	150480000	150490000	106	1.32852045289228e-14	2.8561459253037e-12	150430000	150470000	150480000	150550000	766	0.571429	UI_1381
chr1	150430000	150440000	chr1	150500000	150510000	42	4.22766110242342e-05	0.00155422	150430000	150470000	150480000	150550000	766	0.571429	UI_1382
chr1	154530000	154540000	chr1	154940000	154950000	29	2.76666121318689e-16	7.32115633044573e-14	154520000	154560000	154900000	154980000	261	0.5	UI_1383
chr1	154530000	154540000	chr1	154900000	154910000	26	3.10367405737423e-16	8.16729273812349e-14	154520000	154560000	154900000	154980000	261	0.5	UI_1384
chr1	154530000	154540000	chr1	154970000	154980000	14	6.72190904459168e-07	3.92977556126528e-05	154520000	154560000	154900000	154980000	261	0.5	UI_1385
chr1	172870000	172880000	chr1	172900000	172910000	257	1.88465889756856e-24	1.1616384895589e-21	172870000	172910000	172890000	172950000	2156	0.666667	UI_1386
chr1	172870000	172880000	chr1	172930000	172940000	94	3.16250423200733e-13	5.63565768233105e-11	172870000	172910000	172890000	172950000	2156	0.666667	UI_1387
chr1	172900000	172910000	chr1	172920000	172930000	220	8.43403683483335e-12	1.22003752759692e-09	172870000	172910000	172890000	172950000	2156	0.666667	UI_1388
chr1	178510000	178520000	chr1	178720000	178730000	35	6.95780421720803e-17	1.97922530042463e-14	178500000	178530000	178670000	178750000	408	0.666667	UI_1389
chr1	178510000	178520000	chr1	178690000	178700000	30	1.05027560056446e-14	2.28752228804402e-12	178500000	178530000	178670000	178750000	408	0.666667	UI_1390
chr1	198080000	198090000	chr1	198640000	198650000	23	9.58777288394139e-15	2.09862224408925e-12	198050000	198110000	198620000	198670000	237	0.533333	UI_1391
chr1	198050000	198060000	chr1	198630000	198640000	11	7.16502201410515e-06	0.00032654	198050000	198110000	198620000	198670000	237	0.533333	UI_1392
chr1	205240000	205250000	chr1	205290000	205300000	109	1.36185322916155e-46	3.84611949422715e-43	205220000	205280000	205260000	205310000	1871	0.533333	UI_1393
chr1	205240000	205250000	chr1	205260000	205270000	208	6.20683059740407e-27	4.75353532503396e-24	205220000	205280000	205260000	205310000	1871	0.533333	UI_1394
chr1	205270000	205280000	chr1	205290000	205300000	99	8.30934521023838e-07	4.75690232096025e-05	205220000	205280000	205260000	205310000	1871	0.533333	UI_1395
chr1	23670000	23680000	chr1	23720000	23730000	94	2.79370372545105e-15	6.54182726731615e-13	23650000	23680000	23690000	23760000	882	0.714286	UI_1396
chr1	23670000	23680000	chr1	23690000	23700000	123	6.43563206261561e-12	9.47787059546538e-10	23650000	23680000	23690000	23760000	882	0.714286	UI_1397
chr1	23660000	23670000	chr1	23750000	23760000	30	4.41002957030763e-05	0.00161278	23650000	23680000	23690000	23760000	882	0.714286	UI_1398
chr1	27320000	27330000	chr1	27420000	27430000	98	1.01762086344613e-28	9.01709210053423e-26	27310000	27390000	27400000	27440000	755	0.46875	UI_1399
chr1	27370000	27380000	chr1	27420000	27430000	71	8.47220322235045e-24	4.91040322343209e-21	27310000	27390000	27400000	27440000	755	0.46875	UI_1400
chr1	27440000	27450000	chr1	27470000	27480000	246	5.71927113820133e-53	2.3021674270869e-49	27420000	27470000	27450000	27500000	1509	0.6	UI_1401
chr1	30990000	31000000	chr1	31140000	31150000	133	2.13078135940893e-64	1.47597623920157e-60	30980000	31010000	31110000	31200000	710	0.555556	UI_1402
chr1	30990000	31000000	chr1	31170000	31180000	69	1.1862969409503e-37	1.98151644956072e-34	30980000	31010000	31110000	31200000	710	0.555556	UI_1403
chr1	30990000	31000000	chr1	31110000	31120000	45	9.68213099980076e-14	1.85338016125073e-11	30980000	31010000	31110000	31200000	710	0.555556	UI_1404
chr1	33380000	33390000	chr1	33540000	33550000	32	2.59671772615287e-13	4.68352098159361e-11	33380000	33430000	33500000	33550000	364	0.6	UI_1405
chr1	33400000	33410000	chr1	33510000	33520000	32	3.60447085430996e-12	5.51082650825285e-10	33380000	33430000	33500000	33550000	364	0.6	UI_1406
chr1	33410000	33420000	chr1	33540000	33550000	22	1.8184842123854e-07	1.20498134696858e-05	33380000	33430000	33500000	33550000	364	0.6	UI_1407
chr1	52100000	52110000	chr1	52250000	52260000	44	1.34025700479472e-14	2.87923655528459e-12	52100000	52130000	52180000	52260000	569	0.625	UI_1408
chr1	52100000	52110000	chr1	52210000	52220000	47	1.88550885318366e-13	3.46617189919421e-11	52100000	52130000	52180000	52260000	569	0.625	UI_1409
chr1	52100000	52110000	chr1	52180000	52190000	50	0.000172745	0.0052471	52100000	52130000	52180000	52260000	569	0.625	UI_1410
chr1	55890000	55900000	chr1	56180000	56190000	60	7.48689388923532e-32	8.41462987506523e-29	55860000	55920000	56150000	56210000	439	0.444444	UI_1411
chr1	55860000	55870000	chr1	56180000	56190000	34	1.00026741984184e-17	3.13000149249677e-15	55860000	55920000	56150000	56210000	439	0.444444	UI_1412
chr1	55890000	55900000	chr1	56150000	56160000	17	5.07210199433953e-05	0.00182142	55860000	55920000	56150000	56210000	439	0.444444	UI_1413
chr1	56300000	56310000	chr1	57040000	57050000	22	1.0439669530979e-16	2.90553922288384e-14	56280000	56400000	57030000	57060000	218	0.416667	UI_1414
chr1	56330000	56340000	chr1	57040000	57050000	22	2.93077481121411e-16	7.73266743122223e-14	56280000	56400000	57030000	57060000	218	0.416667	UI_1415
chr1	56380000	56390000	chr1	57040000	57050000	16	2.22102097154016e-10	2.5609618140509e-08	56280000	56400000	57030000	57060000	218	0.416667	UI_1416
chr1	59510000	59520000	chr1	59610000	59620000	53	3.74612720141408e-11	4.90385483256252e-09	59470000	59530000	59580000	59630000	579	0.5	UI_1417
chr1	59480000	59490000	chr1	59610000	59620000	42	3.3195093873196e-07	2.07919812669823e-05	59470000	59530000	59580000	59630000	579	0.5	UI_1418
chr1	59520000	59530000	chr1	59580000	59590000	38	0.000115845	0.00372424	59470000	59530000	59580000	59630000	579	0.5	UI_1419
chr1	59760000	59770000	chr1	60220000	60230000	32	5.533320599308e-23	2.9750560798684e-20	59750000	59780000	60130000	60240000	289	0.454545	UI_1420
chr1	59760000	59770000	chr1	60170000	60180000	30	1.65701213864731e-18	5.65314039647863e-16	59750000	59780000	60130000	60240000	289	0.454545	UI_1421
chr1	59760000	59770000	chr1	60140000	60150000	23	2.10164796348082e-09	2.04275789093262e-07	59750000	59780000	60130000	60240000	289	0.454545	UI_1422
chr1	66420000	66430000	chr1	66700000	66710000	29	3.60846366852836e-21	1.6273039125764e-18	66390000	66450000	66680000	66740000	293	0.416667	UI_1423
chr1	66390000	66400000	chr1	66700000	66710000	15	2.74567802488399e-07	1.75089577876748e-05	66390000	66450000	66680000	66740000	293	0.416667	UI_1424
chr1	66410000	66420000	chr1	66730000	66740000	21	1.54789399218042e-05	0.000644805	66390000	66450000	66680000	66740000	293	0.416667	UI_1425
chr1	94080000	94090000	chr1	94200000	94210000	58	2.97973471764888e-13	5.32575440945627e-11	94060000	94110000	94200000	94250000	436	0.6	UI_1426
chr1	94080000	94090000	chr1	94230000	94240000	35	1.36952603304585e-08	1.14226120246484e-06	94060000	94110000	94200000	94250000	436	0.6	UI_1427
chr1	95040000	95050000	chr1	95130000	95140000	66	4.66144164034352e-13	8.11612484924155e-11	95040000	95090000	95130000	95180000	641	0.72	UI_1428
chr1	95040000	95050000	chr1	95160000	95170000	54	1.31707204880485e-11	1.85151315698741e-09	95040000	95090000	95130000	95180000	641	0.72	UI_1429
chr1	95070000	95080000	chr1	95170000	95180000	45	1.13814644837709e-09	1.16069493168775e-07	95040000	95090000	95130000	95180000	641	0.72	UI_1430
chr1	95320000	95330000	chr1	95440000	95450000	55	2.41361140815422e-20	9.99302769873474e-18	95310000	95340000	95370000	95450000	755	0.625	UI_1431
chr1	95310000	95320000	chr1	95390000	95400000	57	1.07581974378513e-18	3.75194091393939e-16	95310000	95340000	95370000	95450000	755	0.625	UI_1432
chr1	109370000	109380000	chr1	109420000	109430000	104	6.99946675540634e-28	5.79595082512796e-25	109340000	109380000	109410000	109450000	960	0.9375	UI_1433
chr1	109340000	109350000	chr1	109430000	109440000	30	2.43700852514125e-08	1.93435146216915e-06	109340000	109380000	109410000	109450000	960	0.9375	UI_1434
chr1	112050000	112060000	chr1	112160000	112170000	45	3.31126179514863e-18	1.09216414100238e-15	112040000	112060000	112130000	112240000	417	0.681818	UI_1435
chr1	112050000	112060000	chr1	112190000	112200000	45	4.09641101516641e-16	1.06087026950214e-13	112040000	112060000	112130000	112240000	417	0.681818	UI_1436
chr1	112050000	112060000	chr1	112130000	112140000	31	2.62798714116625e-07	1.68258699683087e-05	112040000	112060000	112130000	112240000	417	0.681818	UI_1437
chr1	112050000	112060000	chr1	112220000	112230000	20	1.95824137533778e-05	0.000792897	112040000	112060000	112130000	112240000	417	0.681818	UI_1438
chr1	157980000	157990000	chr1	158980000	158990000	25	7.04300636215875e-20	2.77864046775544e-17	157950000	157990000	158960000	159040000	209	0.46875	UI_1439
chr1	157980000	157990000	chr1	159010000	159020000	12	1.99509038674846e-07	1.31092462114681e-05	157950000	157990000	158960000	159040000	209	0.46875	UI_1440
chr1	157950000	157960000	chr1	158970000	158980000	10	8.13373617770714e-06	0.000365307	157950000	157990000	158960000	159040000	209	0.46875	UI_1441
chr1	160070000	160080000	chr1	160170000	160180000	49	2.64186163302074e-18	8.81101551869706e-16	160060000	160100000	160140000	160190000	460	0.75	UI_1442
chr1	160080000	160090000	chr1	160140000	160150000	31	1.20956533295322e-09	1.2276872900242e-07	160060000	160100000	160140000	160190000	460	0.75	UI_1443
chr1	172900000	172910000	chr1	172960000	172970000	193	1.57323031254004e-39	2.96492842083339e-36	172850000	172950000	172960000	172980000	1485	0.75	UI_1444
chr1	172870000	172880000	chr1	172960000	172970000	138	9.88285949366759e-31	1.02322247954122e-27	172850000	172950000	172960000	172980000	1485	0.75	UI_1445
chr1	172930000	172940000	chr1	172960000	172970000	136	1.48374968067473e-14	3.16796255684766e-12	172850000	172950000	172960000	172980000	1485	0.75	UI_1446
chr1	172900000	172910000	chr1	173090000	173100000	46	1.18477057218872e-18	4.11179707632047e-16	172870000	172940000	173080000	173120000	380	0.571429	UI_1447
chr1	172870000	172880000	chr1	173090000	173100000	31	1.67235969467467e-10	1.96771926559584e-08	172870000	172940000	173080000	173120000	380	0.571429	UI_1448
chr1	172930000	172940000	chr1	173090000	173100000	21	5.17346314572639e-06	0.00024441	172870000	172940000	173080000	173120000	380	0.571429	UI_1449
chr1	201590000	201600000	chr1	201760000	201770000	30	6.54905800432909e-09	5.80627054967162e-07	201590000	201630000	201750000	201830000	455	0.46875	UI_1450
chr1	201600000	201610000	chr1	201810000	201820000	35	1.80466755007156e-08	1.4707715992162e-06	201590000	201630000	201750000	201830000	455	0.46875	UI_1451
chr1	201620000	201630000	chr1	201780000	201790000	22	0.000108969	0.00353354	201590000	201630000	201750000	201830000	455	0.46875	UI_1452
chr1	203240000	203250000	chr1	203270000	203280000	120	7.58775150631035e-25	4.85070576528681e-22	203230000	203270000	203260000	203350000	950	0.416667	UI_1453
chr1	203240000	203250000	chr1	203320000	203330000	100	1.49245561314207e-19	5.69768676955913e-17	203230000	203270000	203260000	203350000	950	0.416667	UI_1454
chr1	204380000	204390000	chr1	204470000	204480000	129	2.56952372621447e-41	5.38747269357865e-38	204370000	204420000	204450000	204490000	969	0.75	UI_1455
chr1	204410000	204420000	chr1	204470000	204480000	48	2.55641915455563e-05	0.00100127	204370000	204420000	204450000	204490000	969	0.75	UI_1456
chr1	210040000	210050000	chr1	210460000	210470000	31	3.6586736548607e-16	9.54044716094206e-14	210000000	210080000	210460000	210490000	298	0.625	UI_1457
chr1	210000000	210010000	chr1	210470000	210480000	20	1.72225539065167e-08	1.40886766539802e-06	210000000	210080000	210460000	210490000	298	0.625	UI_1458
chr1	210070000	210080000	chr1	210460000	210470000	16	2.24586463054862e-05	0.000893762	210000000	210080000	210460000	210490000	298	0.625	UI_1459
chr1	215010000	215020000	chr1	215170000	215180000	54	1.10873811237412e-25	7.61455247668612e-23	214990000	215040000	215130000	215200000	485	0.457143	UI_1460
chr1	215010000	215020000	chr1	215130000	215140000	47	3.19990335798001e-14	6.53719376470312e-12	214990000	215040000	215130000	215200000	485	0.457143	UI_1461
chr1	245960000	245970000	chr1	246030000	246040000	70	2.57815518020313e-15	6.0645771867428e-13	245910000	245980000	246010000	246050000	754	0.535714	UI_1462
chr1	245930000	245940000	chr1	246030000	246040000	67	2.67508629062209e-15	6.27932927881071e-13	245910000	245980000	246010000	246050000	754	0.535714	UI_1463
chr1	8960000	8970000	chr1	9160000	9170000	32	1.58649149089348e-12	2.55789543553813e-10	8930000	8990000	9120000	9190000	361	0.404762	UI_1464
chr1	8960000	8970000	chr1	9120000	9130000	36	8.48168551464049e-09	7.36199949917939e-07	8930000	8990000	9120000	9190000	361	0.404762	UI_1465
chr1	8930000	8940000	chr1	9140000	9150000	27	1.30504527160549e-08	1.09296297307133e-06	8930000	8990000	9120000	9190000	361	0.404762	UI_1466
chr1	9400000	9410000	chr1	9470000	9480000	47	6.28272310863228e-11	7.93580058285368e-09	9400000	9460000	9430000	9490000	595	0.388889	UI_1467
chr1	9440000	9450000	chr1	9470000	9480000	58	1.13838143171423e-07	7.88032777379428e-06	9400000	9460000	9430000	9490000	595	0.388889	UI_1468
chr1	9400000	9410000	chr1	9440000	9450000	45	3.86565490594848e-06	0.000188598	9400000	9460000	9430000	9490000	595	0.388889	UI_1469
chr1	27620000	27630000	chr1	27980000	27990000	24	1.03736834667959e-11	1.48085113786255e-09	27620000	27680000	27920000	28000000	220	0.395833	UI_1470
chr1	27620000	27630000	chr1	27930000	27940000	23	2.55394494559924e-11	3.43000947720405e-09	27620000	27680000	27920000	28000000	220	0.395833	UI_1471
chr1	27650000	27660000	chr1	27930000	27940000	18	7.79017618605777e-08	5.57843502907094e-06	27620000	27680000	27920000	28000000	220	0.395833	UI_1472
chr1	29560000	29570000	chr1	30180000	30190000	30	2.49962536981862e-23	1.38776595025819e-20	29550000	29610000	30150000	30190000	218	0.583333	UI_1473
chr1	29590000	29600000	chr1	30180000	30190000	24	1.48826636710159e-16	4.06664744844707e-14	29550000	29610000	30150000	30190000	218	0.583333	UI_1474
chr1	29560000	29570000	chr1	30150000	30160000	10	0.000187258	0.00562282	29550000	29610000	30150000	30190000	218	0.583333	UI_1475
chr1	53570000	53580000	chr1	53640000	53650000	218	2.25398155270653e-64	1.55929627367551e-60	53570000	53590000	53590000	53670000	2304	0.875	UI_1476
chr1	53570000	53580000	chr1	53610000	53620000	262	2.88369391679384e-48	9.02328918533173e-45	53570000	53590000	53590000	53670000	2304	0.875	UI_1477
chr1	54120000	54130000	chr1	54200000	54210000	138	8.65810221022042e-35	1.19237564166736e-31	54110000	54170000	54190000	54240000	1247	0.466667	UI_1478
chr1	54160000	54170000	chr1	54200000	54210000	140	1.85522904322914e-15	4.43922270325326e-13	54110000	54170000	54190000	54240000	1247	0.466667	UI_1479
chr1	54120000	54130000	chr1	54230000	54240000	40	3.74416093173572e-07	2.31820522062729e-05	54110000	54170000	54190000	54240000	1247	0.466667	UI_1480
chr1	55750000	55760000	chr1	57040000	57050000	37	2.61962439082945e-37	4.28006926906756e-34	55740000	55780000	57040000	57130000	226	0.472222	UI_1481
chr1	55740000	55750000	chr1	57080000	57090000	11	4.155501717996e-07	2.54596001628397e-05	55740000	55780000	57040000	57130000	226	0.472222	UI_1482
chr1	55740000	55750000	chr1	57120000	57130000	10	2.79720327245955e-06	0.000141309	55740000	55780000	57040000	57130000	226	0.472222	UI_1483
chr1	92110000	92120000	chr1	92360000	92370000	36	4.40770953020509e-16	1.13724817986063e-13	92110000	92130000	92290000	92400000	347	0.636364	UI_1484
chr1	92110000	92120000	chr1	92310000	92320000	29	6.50896909168864e-08	4.73652101584592e-06	92110000	92130000	92290000	92400000	347	0.636364	UI_1485
chr1	92110000	92120000	chr1	92390000	92400000	18	9.55881049379255e-06	0.00042141	92110000	92130000	92290000	92400000	347	0.636364	UI_1486
chr1	110190000	110200000	chr1	110300000	110310000	72	3.97329862903037e-30	3.9329118227528e-27	110160000	110220000	110300000	110340000	526	0.583333	UI_1487
chr1	110160000	110170000	chr1	110300000	110310000	51	3.17497211859238e-14	6.48873975837918e-12	110160000	110220000	110300000	110340000	526	0.583333	UI_1488
chr1	110180000	110190000	chr1	110330000	110340000	25	4.01276585834753e-05	0.00148475	110160000	110220000	110300000	110340000	526	0.583333	UI_1489
chr1	112930000	112940000	chr1	113160000	113170000	73	2.71848646441667e-39	5.06174796598332e-36	112920000	112970000	113140000	113190000	473	0.56	UI_1490
chr1	112960000	112970000	chr1	113160000	113170000	40	1.40284219184584e-16	3.84442527753818e-14	112920000	112970000	113140000	113190000	473	0.56	UI_1491
chr1	118340000	118350000	chr1	118360000	118370000	132	1.50739213114512e-12	2.43841401688602e-10	118330000	118380000	118350000	118410000	1071	0.5	UI_1492
chr1	118360000	118370000	chr1	118390000	118400000	67	4.73337407894038e-08	3.5450410645861e-06	118330000	118380000	118350000	118410000	1071	0.5	UI_1493
chr1	149850000	149860000	chr1	150140000	150150000	19	7.72262268851366e-09	6.75378824347523e-07	149850000	149900000	150120000	150170000	194	0.56	UI_1494
chr1	149890000	149900000	chr1	150140000	150150000	15	4.13199295110706e-06	0.000200132	149850000	149900000	150120000	150170000	194	0.56	UI_1495
chr1	154940000	154950000	chr1	154960000	154970000	188	9.26099862060416e-27	6.98455490720854e-24	154900000	154960000	154940000	155000000	1073	0.388889	UI_1496
chr1	154910000	154920000	chr1	154970000	154980000	39	7.14431596721428e-08	5.15424956435271e-06	154900000	154960000	154940000	155000000	1073	0.388889	UI_1497
chr1	154940000	154950000	chr1	155020000	155030000	61	1.78303120832931e-15	4.27689635203413e-13	154910000	154950000	155010000	155060000	445	0.7	UI_1498
chr1	154940000	154950000	chr1	155050000	155060000	35	2.16276931030994e-07	1.41037413682311e-05	154910000	154950000	155010000	155060000	445	0.7	UI_1499
chr1	154910000	154920000	chr1	155030000	155040000	19	1.46777968875545e-05	0.000615351	154910000	154950000	155010000	155060000	445	0.7	UI_1500
chr1	162870000	162880000	chr1	162940000	162950000	102	2.19425536391186e-28	1.89670561132788e-25	162840000	162890000	162940000	162970000	694	0.933333	UI_1501
chr1	162840000	162850000	chr1	162940000	162950000	35	3.09645531513853e-08	2.40641783067293e-06	162840000	162890000	162940000	162970000	694	0.933333	UI_1502
chr1	173440000	173450000	chr1	173790000	173800000	28	3.90636311752952e-16	1.01487175253078e-13	173380000	173450000	173780000	173840000	226	0.452381	UI_1503
chr1	173440000	173450000	chr1	173830000	173840000	19	2.63075696740513e-10	2.99562398260274e-08	173380000	173450000	173780000	173840000	226	0.452381	UI_1504
chr1	173390000	173400000	chr1	173790000	173800000	16	2.47890999308711e-09	2.37693820589793e-07	173380000	173450000	173780000	173840000	226	0.452381	UI_1505
chr1	200380000	200390000	chr1	200450000	200460000	55	2.97883093695074e-11	3.958784401706e-09	200370000	200410000	200400000	200460000	678	0.583333	UI_1506
chr1	200380000	200390000	chr1	200400000	200410000	94	4.24883983587902e-06	0.000205157	200370000	200410000	200400000	200460000	678	0.583333	UI_1507
chr1	201470000	201480000	chr1	201750000	201760000	35	2.21856377086244e-11	3.00894279874488e-09	201450000	201490000	201750000	201830000	292	0.4375	UI_1508
chr1	201470000	201480000	chr1	201810000	201820000	27	2.19976238330217e-09	2.13030998385484e-07	201450000	201490000	201750000	201830000	292	0.4375	UI_1509
chr1	201470000	201480000	chr1	201780000	201790000	21	3.66376015006485e-06	0.000179791	201450000	201490000	201750000	201830000	292	0.4375	UI_1510
chr1	208000000	208010000	chr1	208040000	208050000	116	1.09337185033783e-24	6.89370983866142e-22	207970000	208010000	208020000	208070000	1102	0.7	UI_1511
chr1	207970000	207980000	chr1	208040000	208050000	30	0.000316305	0.00879138	207970000	208010000	208020000	208070000	1102	0.7	UI_1512
chr1	208200000	208210000	chr1	208410000	208420000	45	1.104104069763e-27	8.98537736418759e-25	208170000	208210000	208370000	208430000	381	0.583333	UI_1513
chr1	208180000	208190000	chr1	208370000	208380000	29	1.06726260458466e-10	1.29825949423363e-08	208170000	208210000	208370000	208430000	381	0.583333	UI_1514
chr1	208170000	208180000	chr1	208410000	208420000	17	4.69883275635197e-05	0.00170443	208170000	208210000	208370000	208430000	381	0.583333	UI_1515
chr1	208330000	208340000	chr1	208370000	208380000	117	8.09868709011491e-18	2.55907026923977e-15	208330000	208360000	208370000	208420000	893	0.933333	UI_1516
chr1	208330000	208340000	chr1	208400000	208410000	66	5.82217741528382e-17	1.67008686793552e-14	208330000	208360000	208370000	208420000	893	0.933333	UI_1517
chr1	211750000	211760000	chr1	211820000	211830000	114	6.41698355524992e-48	1.96199950956459e-44	211740000	211790000	211800000	211840000	946	0.7	UI_1518
chr1	211780000	211790000	chr1	211820000	211830000	49	4.31394873728395e-05	0.00158196	211740000	211790000	211800000	211840000	946	0.7	UI_1519
chr1	218670000	218680000	chr1	219730000	219740000	17	2.18206672465663e-11	2.96248637745526e-09	218630000	218680000	219710000	219760000	169	0.56	UI_1520
chr1	218640000	218650000	chr1	219740000	219750000	11	5.55796848855889e-07	3.31089228277518e-05	218630000	218680000	219710000	219760000	169	0.56	UI_1521
chr1	221910000	221920000	chr1	222620000	222630000	45	1.73532438818549e-42	3.89253204853996e-39	221880000	221950000	222610000	222650000	239	0.5	UI_1522
chr1	221880000	221890000	chr1	222620000	222630000	19	3.40038035522236e-13	6.03372146605904e-11	221880000	221950000	222610000	222650000	239	0.5	UI_1523
chr1	221940000	221950000	chr1	222630000	222640000	9	0.000141658	0.00442625	221880000	221950000	222610000	222650000	239	0.5	UI_1524
chr1	240390000	240400000	chr1	240850000	240860000	21	1.68261962656132e-10	1.97900744679098e-08	240390000	240450000	240850000	240890000	197	0.583333	UI_1525
chr1	240420000	240430000	chr1	240870000	240880000	16	7.98031384720022e-08	5.7019152644025e-06	240390000	240450000	240850000	240890000	197	0.583333	UI_1526
chr1	240390000	240400000	chr1	240880000	240890000	13	5.1146293650415e-06	0.000241919	240390000	240450000	240850000	240890000	197	0.583333	UI_1527
chr1	245760000	245770000	chr1	246160000	246170000	36	4.24462128635646e-23	2.3072247780262e-20	245720000	245780000	246130000	246170000	257	0.583333	UI_1528
chr1	245730000	245740000	chr1	246140000	246150000	20	1.15677941165732e-08	9.78043334919713e-07	245720000	245780000	246130000	246170000	257	0.583333	UI_1529
chr1	245760000	245770000	chr1	246130000	246140000	17	3.63181521556468e-08	2.78371806578097e-06	245720000	245780000	246130000	246170000	257	0.583333	UI_1530
chr1	940000	950000	chr1	1240000	1250000	28	2.93704964936742e-14	6.02933860007376e-12	920000	980000	1230000	1270000	217	0.541667	UI_1531
chr1	970000	980000	chr1	1240000	1250000	15	1.11306586483141e-07	7.72027398179e-06	920000	980000	1230000	1270000	217	0.541667	UI_1532
chr1	6860000	6870000	chr1	6920000	6930000	102	2.94585807901208e-27	2.31682174002675e-24	6840000	6880000	6910000	6960000	674	0.65	UI_1533
chr1	6850000	6860000	chr1	6950000	6960000	26	3.40500262578342e-07	2.12740250046473e-05	6840000	6880000	6910000	6960000	674	0.65	UI_1534
chr1	9760000	9770000	chr1	9960000	9970000	25	3.07099067051821e-09	2.89416962723046e-07	9740000	9800000	9910000	9970000	244	0.361111	UI_1535
chr1	9760000	9770000	chr1	9910000	9920000	26	7.55961933121786e-08	5.42801902639105e-06	9740000	9800000	9910000	9970000	244	0.361111	UI_1536
chr1	9790000	9800000	chr1	9910000	9920000	17	4.29816076197142e-05	0.00157697	9740000	9800000	9910000	9970000	244	0.361111	UI_1537
chr1	19720000	19730000	chr1	19770000	19780000	240	3.00398131522187e-52	1.16908970873639e-48	19700000	19730000	19740000	19800000	1840	0.722222	UI_1538
chr1	19720000	19730000	chr1	19740000	19750000	244	2.50491061601686e-23	1.39048372257883e-20	19700000	19730000	19740000	19800000	1840	0.722222	UI_1539
chr1	21060000	21070000	chr1	21640000	21650000	23	1.32241295977258e-10	1.58349202398138e-08	21040000	21070000	21600000	21670000	194	0.619048	UI_1540
chr1	21050000	21060000	chr1	21600000	21610000	13	3.47909025635628e-05	0.00131068	21040000	21070000	21600000	21670000	194	0.619048	UI_1541
chr1	28200000	28210000	chr1	28290000	28300000	90	2.24249919699618e-29	2.09192451999442e-26	28170000	28220000	28280000	28320000	628	0.65	UI_1542
chr1	28170000	28180000	chr1	28290000	28300000	24	1.15484489007666e-06	6.39454977799513e-05	28170000	28220000	28280000	28320000	628	0.65	UI_1543
chr1	45810000	45820000	chr1	45960000	45970000	41	4.5957503138762e-21	2.05109080604073e-18	45790000	45850000	45940000	45990000	354	0.466667	UI_1544
chr1	45840000	45850000	chr1	45950000	45960000	20	2.37225633732679e-06	0.000121873	45790000	45850000	45940000	45990000	354	0.466667	UI_1545
chr1	78440000	78450000	chr1	78560000	78570000	112	8.68505174987776e-48	2.62544155720304e-44	78410000	78450000	78520000	78590000	626	0.464286	UI_1546
chr1	78440000	78450000	chr1	78520000	78530000	59	2.59616589131006e-11	3.48203465527506e-09	78410000	78450000	78520000	78590000	626	0.464286	UI_1547
chr1	78410000	78420000	chr1	78570000	78580000	26	1.09789815609751e-09	1.12271098194302e-07	78410000	78450000	78520000	78590000	626	0.464286	UI_1548
chr1	84610000	84620000	chr1	85060000	85070000	21	7.55666078937228e-10	7.94430390217454e-08	84560000	84640000	85060000	85090000	184	0.541667	UI_1549
chr1	84580000	84590000	chr1	85060000	85070000	14	3.88635742862088e-07	2.39700476644722e-05	84560000	84640000	85060000	85090000	184	0.541667	UI_1550
chr1	84900000	84910000	chr1	85070000	85080000	33	3.68997287337844e-15	8.50939983529187e-13	84890000	84950000	85060000	85090000	371	0.722222	UI_1551
chr1	84940000	84950000	chr1	85080000	85090000	30	8.23589760603474e-13	1.38338607370361e-10	84890000	84950000	85060000	85090000	371	0.722222	UI_1552
chr1	109980000	109990000	chr1	110010000	110020000	122	7.13982906438046e-22	3.45621887816367e-19	109960000	109990000	109980000	110040000	930	0.722222	UI_1553
chr1	109960000	109970000	chr1	109980000	109990000	134	1.23272423583616e-10	1.48400505738686e-08	109960000	109990000	109980000	110040000	930	0.722222	UI_1554
chr1	115680000	115690000	chr1	115870000	115880000	74	2.51150875247853e-37	4.10656139539265e-34	115670000	115690000	115820000	115890000	534	0.928571	UI_1555
chr1	115670000	115680000	chr1	115830000	115840000	39	1.8052917061401e-13	3.32837533310496e-11	115670000	115690000	115820000	115890000	534	0.928571	UI_1556
chr1	145000000	145010000	chr1	145090000	145100000	106	8.58748427475205e-11	1.06133354941549e-08	144990000	145020000	145030000	145100000	1463	0.619048	UI_1557
chr1	145010000	145020000	chr1	145030000	145040000	232	7.446971774012e-09	6.5330186854835e-07	144990000	145020000	145030000	145100000	1463	0.619048	UI_1558
chr1	145000000	145010000	chr1	145060000	145070000	105	6.86184556444593e-07	4.00394010339767e-05	144990000	145020000	145030000	145100000	1463	0.619048	UI_1559
chr1	145430000	145440000	chr1	145510000	145520000	49	7.59664730728646e-14	1.47473271694708e-11	145410000	145460000	145490000	145530000	508	0.65	UI_1560
chr1	149930000	149940000	chr1	150150000	150160000	34	1.34454627476422e-20	5.71411971332855e-18	149920000	149970000	150120000	150180000	258	0.433333	UI_1561
chr1	149930000	149940000	chr1	150120000	150130000	26	1.69122691705668e-10	1.98805961211994e-08	149920000	149970000	150120000	150180000	258	0.433333	UI_1562
chr1	149960000	149970000	chr1	150140000	150150000	15	4.01656791655857e-05	0.00148602	149920000	149970000	150120000	150180000	258	0.433333	UI_1563
chr1	155220000	155230000	chr1	155280000	155290000	72	1.7676465195733e-21	8.23616082688759e-19	155210000	155250000	155260000	155300000	740	0.8125	UI_1564
chr1	156710000	156720000	chr1	156860000	156870000	94	1.63952548236318e-22	8.44124923326296e-20	156710000	156740000	156820000	156880000	706	0.722222	UI_1565
chr1	156710000	156720000	chr1	156830000	156840000	64	2.30155192595594e-17	6.90980623035875e-15	156710000	156740000	156820000	156880000	706	0.722222	UI_1566
chr1	171750000	171760000	chr1	171950000	171960000	41	3.37854888376312e-26	2.43229411835316e-23	171750000	171810000	171920000	171970000	285	0.433333	UI_1567
chr1	171800000	171810000	chr1	171950000	171960000	24	4.13319439362894e-13	7.25068068779786e-11	171750000	171810000	171920000	171970000	285	0.433333	UI_1568
chr1	171760000	171770000	chr1	171920000	171930000	21	1.5096513418781e-05	0.000630737	171750000	171810000	171920000	171970000	285	0.433333	UI_1569
chr1	201620000	201630000	chr1	201660000	201670000	95	5.21760142440887e-15	1.18061914825663e-12	201590000	201630000	201650000	201690000	1084	0.8125	UI_1570
chr1	201590000	201600000	chr1	201670000	201680000	70	2.12797991822296e-09	2.06649274864624e-07	201590000	201630000	201650000	201690000	1084	0.8125	UI_1571
chr1	203410000	203420000	chr1	203450000	203460000	125	4.01785287993435e-21	1.80166985122608e-18	203390000	203440000	203410000	203460000	1253	0.52	UI_1572
chr1	203390000	203400000	chr1	203410000	203420000	113	1.68183409120089e-07	1.12283656253595e-05	203390000	203440000	203410000	203460000	1253	0.52	UI_1573
chr1	203610000	203620000	chr1	203660000	203670000	170	1.73285251188591e-28	1.50933754094404e-25	203590000	203620000	203630000	203680000	1755	0.866667	UI_1574
chr1	203610000	203620000	chr1	203630000	203640000	287	3.79249976812913e-25	2.48812644645449e-22	203590000	203620000	203630000	203680000	1755	0.866667	UI_1575
chr1	210010000	210020000	chr1	210160000	210170000	39	3.38561622194731e-18	1.11534722993121e-15	210000000	210080000	210140000	210170000	457	0.541667	UI_1576
chr1	210040000	210050000	chr1	210160000	210170000	44	8.20271536142426e-18	2.59048755853879e-15	210000000	210080000	210140000	210170000	457	0.541667	UI_1577
chr1	210070000	210080000	chr1	210160000	210170000	30	7.57016165964949e-08	5.43467656200331e-06	210000000	210080000	210140000	210170000	457	0.541667	UI_1578
chr1	218650000	218660000	chr1	219240000	219250000	23	2.12747376146807e-15	5.05379423947494e-13	218630000	218660000	219210000	219280000	202	0.619048	UI_1579
chr1	218650000	218660000	chr1	219270000	219280000	12	2.50937222974655e-05	0.000985031	218630000	218660000	219210000	219280000	202	0.619048	UI_1580
chr1	218650000	218660000	chr1	219210000	219220000	13	3.73162691608011e-05	0.00139337	218630000	218660000	219210000	219280000	202	0.619048	UI_1581
chr1	218670000	218680000	chr1	219960000	219970000	17	2.29655007217144e-12	3.6128223769894e-10	218630000	218680000	219960000	220010000	149	0.52	UI_1582
chr1	218640000	218650000	chr1	219960000	219970000	10	5.75957050442407e-06	0.000268929	218630000	218680000	219960000	220010000	149	0.52	UI_1583
chr1	218670000	218680000	chr1	219990000	220000000	8	0.000196963	0.00587207	218630000	218680000	219960000	220010000	149	0.52	UI_1584
chr1	221050000	221060000	chr1	221610000	221620000	46	3.75386512658238e-40	7.3487330707214e-37	221030000	221070000	221580000	221650000	253	0.464286	UI_1585
chr1	221050000	221060000	chr1	221640000	221650000	20	4.71964878573962e-11	6.08213410083699e-09	221030000	221070000	221580000	221650000	253	0.464286	UI_1586
chr1	221050000	221060000	chr1	221580000	221590000	18	8.23234746249068e-09	7.16383291634946e-07	221030000	221070000	221580000	221650000	253	0.464286	UI_1587
chr1	221630000	221640000	chr1	221910000	221920000	36	3.32530218467951e-16	8.72003894008168e-14	221610000	221670000	221870000	221930000	268	0.388889	UI_1588
chr1	221660000	221670000	chr1	221910000	221920000	21	1.65379384539629e-08	1.35754654036385e-06	221610000	221670000	221870000	221930000	268	0.388889	UI_1589
chr1	221630000	221640000	chr1	221880000	221890000	22	2.49680333012185e-07	1.60624972576232e-05	221610000	221670000	221870000	221930000	268	0.388889	UI_1590
chr1	221630000	221640000	chr1	222620000	222630000	23	3.59742925778196e-18	1.1814870158087e-15	221610000	221670000	222610000	222650000	168	0.541667	UI_1591
chr1	221660000	221670000	chr1	222620000	222630000	13	9.91447865756185e-09	8.49179583029975e-07	221610000	221670000	222610000	222650000	168	0.541667	UI_1592
chr1	221910000	221920000	chr1	222050000	222060000	38	2.66007430889299e-13	4.79003809583318e-11	221880000	221920000	222000000	222070000	374	0.464286	UI_1593
chr1	221910000	221920000	chr1	222020000	222030000	36	1.90330878135798e-09	1.86471989976036e-07	221880000	221920000	222000000	222070000	374	0.464286	UI_1594
chr1	221880000	221890000	chr1	222060000	222070000	17	9.18421014594454e-05	0.00304748	221880000	221920000	222000000	222070000	374	0.464286	UI_1595
chr1	2340000	2350000	chr1	2510000	2520000	32	2.48918454341193e-17	7.44262142340846e-15	2330000	2360000	2450000	2520000	232	0.571429	UI_1596
chr1	2340000	2350000	chr1	2480000	2490000	29	3.88108676213032e-14	7.84000197712851e-12	2330000	2360000	2450000	2520000	232	0.571429	UI_1597
chr1	2340000	2350000	chr1	2450000	2460000	25	4.40416356634906e-09	4.03084854636321e-07	2330000	2360000	2450000	2520000	232	0.571429	UI_1598
chr1	7360000	7370000	chr1	7530000	7540000	52	2.57795328073837e-21	1.18201379342627e-18	7320000	7380000	7510000	7560000	305	0.4	UI_1599
chr1	7320000	7330000	chr1	7530000	7540000	22	2.36002271869667e-07	1.52619654261407e-05	7320000	7380000	7510000	7560000	305	0.4	UI_1600
chr1	8430000	8440000	chr1	8470000	8480000	96	1.82287907519385e-12	2.91250321104276e-10	8430000	8470000	8450000	8530000	1190	0.375	UI_1601
chr1	8450000	8460000	chr1	8520000	8530000	74	9.20063854272324e-11	1.13107520459148e-08	8430000	8470000	8450000	8530000	1190	0.375	UI_1602
chr1	8460000	8470000	chr1	8480000	8490000	115	7.0935512457296e-06	0.000323657	8430000	8470000	8450000	8530000	1190	0.375	UI_1603
chr1	9710000	9720000	chr1	9760000	9770000	59	5.25666572234561e-12	7.8477029657999e-10	9710000	9760000	9730000	9780000	756	0.48	UI_1604
chr1	9740000	9750000	chr1	9760000	9770000	93	1.19056509611373e-07	8.20613688397921e-06	9710000	9760000	9730000	9780000	756	0.48	UI_1605
chr1	9710000	9720000	chr1	9730000	9740000	67	6.01631792897387e-07	3.55567095791803e-05	9710000	9760000	9730000	9780000	756	0.48	UI_1606
chr1	14840000	14850000	chr1	15250000	15260000	36	3.03068153033749e-19	1.12130834206879e-16	14830000	14880000	15240000	15300000	256	0.433333	UI_1607
chr1	14840000	14850000	chr1	15290000	15300000	27	2.6122792588804e-13	4.7092851460142e-11	14830000	14880000	15240000	15300000	256	0.433333	UI_1608
chr1	14870000	14880000	chr1	15250000	15260000	16	1.39049448958773e-06	7.55113241320824e-05	14830000	14880000	15240000	15300000	256	0.433333	UI_1609
chr1	19250000	19260000	chr1	19420000	19430000	43	6.72025894155759e-20	2.65709150700541e-17	19220000	19290000	19420000	19450000	350	0.571429	UI_1610
chr1	19220000	19230000	chr1	19420000	19430000	35	8.08821954681531e-16	2.02067038605353e-13	19220000	19290000	19420000	19450000	350	0.571429	UI_1611
chr1	19280000	19290000	chr1	19420000	19430000	20	8.26334917600246e-05	0.0027816	19220000	19290000	19420000	19450000	350	0.571429	UI_1612
chr1	24320000	24330000	chr1	24340000	24350000	210	3.27045680702288e-33	4.05167358620185e-30	24270000	24330000	24340000	24380000	1161	0.5	UI_1613
chr1	24280000	24290000	chr1	24340000	24350000	92	5.61458037999017e-14	1.11100858243113e-11	24270000	24330000	24340000	24380000	1161	0.5	UI_1614
chr1	24300000	24310000	chr1	24370000	24380000	45	6.91628673553519e-12	1.01406369508352e-09	24270000	24330000	24340000	24380000	1161	0.5	UI_1615
chr1	27640000	27650000	chr1	27710000	27720000	78	9.56376152367158e-26	6.60336181166234e-23	27640000	27680000	27690000	27730000	679	0.75	UI_1616
chr1	27670000	27680000	chr1	27710000	27720000	48	2.52723587942712e-08	1.99969093159161e-06	27640000	27680000	27690000	27730000	679	0.75	UI_1617
chr1	28580000	28590000	chr1	28650000	28660000	65	7.71056110122173e-14	1.49573361617289e-11	28550000	28600000	28650000	28700000	395	0.48	UI_1618
chr1	28580000	28590000	chr1	28680000	28690000	37	1.12809098035764e-07	7.81536567401464e-06	28550000	28600000	28650000	28700000	395	0.48	UI_1619
chr1	28550000	28560000	chr1	28660000	28670000	19	0.000105231	0.00342828	28550000	28600000	28650000	28700000	395	0.48	UI_1620
chr1	37940000	37950000	chr1	37990000	38000000	59	1.56641472216076e-08	1.29170874244135e-06	37940000	38000000	37990000	38030000	644	0.5	UI_1621
chr1	37980000	37990000	chr1	38000000	38010000	83	2.17879293874418e-08	1.74649167938951e-06	37940000	38000000	37990000	38030000	644	0.5	UI_1622
chr1	39570000	39580000	chr1	39620000	39630000	137	2.29963914749334e-29	2.14298477131434e-26	39560000	39610000	39590000	39630000	996	0.6	UI_1623
chr1	39600000	39610000	chr1	39620000	39630000	112	1.36416183200781e-10	1.62963346280632e-08	39560000	39610000	39590000	39630000	996	0.6	UI_1624
chr1	39570000	39580000	chr1	39590000	39600000	90	1.05714403627012e-05	0.0004606	39560000	39610000	39590000	39630000	996	0.6	UI_1625
chr1	44300000	44310000	chr1	44390000	44400000	56	8.28195364796279e-15	1.82817524428783e-12	44280000	44360000	44380000	44410000	471	0.5	UI_1626
chr1	44340000	44350000	chr1	44390000	44400000	46	2.68034406395234e-09	2.5545126343922e-07	44280000	44360000	44380000	44410000	471	0.5	UI_1627
chr1	51430000	51440000	chr1	51700000	51710000	37	2.20913722838233e-15	5.23766407207988e-13	51420000	51450000	51690000	51750000	255	0.666667	UI_1628
chr1	51430000	51440000	chr1	51730000	51740000	20	1.57411770846741e-07	1.05707878995283e-05	51420000	51450000	51690000	51750000	255	0.666667	UI_1629
chr1	54600000	54610000	chr1	54870000	54880000	37	7.09039074043719e-19	2.52146129729619e-16	54520000	54620000	54860000	54890000	293	0.4	UI_1630
chr1	54570000	54580000	chr1	54870000	54880000	34	4.20880116168661e-16	1.08818479761249e-13	54520000	54620000	54860000	54890000	293	0.4	UI_1631
chr1	54540000	54550000	chr1	54870000	54880000	25	2.78143868266687e-10	3.15373970258207e-08	54520000	54620000	54860000	54890000	293	0.4	UI_1632
chr1	54740000	54750000	chr1	54790000	54800000	62	3.60301906167222e-10	4.00795754205718e-08	54710000	54780000	54790000	54810000	553	0.857143	UI_1633
chr1	54770000	54780000	chr1	54800000	54810000	53	2.16841583616684e-06	0.00011246	54710000	54780000	54790000	54810000	553	0.857143	UI_1634
chr1	54710000	54720000	chr1	54800000	54810000	29	2.36838707037203e-05	0.000936408	54710000	54780000	54790000	54810000	553	0.857143	UI_1635
chr1	56530000	56540000	chr1	57040000	57050000	30	5.13391927720187e-21	2.27900841338935e-18	56500000	56590000	57020000	57060000	196	0.333333	UI_1636
chr1	56560000	56570000	chr1	57040000	57050000	17	2.90418660634324e-09	2.74903310749259e-07	56500000	56590000	57020000	57060000	196	0.333333	UI_1637
chr1	56500000	56510000	chr1	57040000	57050000	12	1.12171535566947e-06	6.23026639311907e-05	56500000	56590000	57020000	57060000	196	0.333333	UI_1638
chr1	59220000	59230000	chr1	59850000	59860000	18	7.80809741434268e-11	9.71237524588288e-09	59200000	59230000	59820000	59900000	145	0.5	UI_1639
chr1	59200000	59210000	chr1	59890000	59900000	13	8.14335331447391e-08	5.8074657834946e-06	59200000	59230000	59820000	59900000	145	0.5	UI_1640
chr1	59210000	59220000	chr1	59820000	59830000	9	0.000120225	0.0038449	59200000	59230000	59820000	59900000	145	0.5	UI_1641
chr1	90280000	90290000	chr1	90300000	90310000	77	1.94875268006377e-07	1.28350012308592e-05	90260000	90310000	90300000	90360000	721	0.466667	UI_1642
chr1	90300000	90310000	chr1	90350000	90360000	53	1.29150525542579e-06	7.06782930502157e-05	90260000	90310000	90300000	90360000	721	0.466667	UI_1643
chr1	90270000	90280000	chr1	90330000	90340000	39	0.000288945	0.00813897	90260000	90310000	90300000	90360000	721	0.466667	UI_1644
chr1	92170000	92180000	chr1	92350000	92360000	37	1.67216979462342e-13	3.09746502592784e-11	92140000	92180000	92350000	92400000	295	0.6	UI_1645
chr1	92160000	92170000	chr1	92390000	92400000	30	4.25504057678773e-12	6.43919840899396e-10	92140000	92180000	92350000	92400000	295	0.6	UI_1646
chr1	92140000	92150000	chr1	92350000	92360000	16	0.000259677	0.00743345	92140000	92180000	92350000	92400000	295	0.6	UI_1647
chr1	94520000	94530000	chr1	94560000	94570000	151	1.33528641759625e-20	5.67611999421928e-18	94490000	94550000	94530000	94570000	1306	0.5	UI_1648
chr1	94500000	94510000	chr1	94530000	94540000	91	6.82351090523846e-05	0.0023564	94490000	94550000	94530000	94570000	1306	0.5	UI_1649
chr1	94490000	94500000	chr1	94560000	94570000	51	8.86639685882785e-05	0.0029561	94490000	94550000	94530000	94570000	1306	0.5	UI_1650
chr1	99640000	99650000	chr1	99930000	99940000	20	9.33668814303202e-12	1.34206227454894e-09	99620000	99660000	99900000	99960000	195	0.5	UI_1651
chr1	99630000	99640000	chr1	99900000	99910000	17	1.84190821126104e-08	1.49825643829614e-06	99620000	99660000	99900000	99960000	195	0.5	UI_1652
chr1	99730000	99740000	chr1	99920000	99930000	51	1.15835823893163e-25	7.94156448909673e-23	99720000	99750000	99900000	99960000	345	0.666667	UI_1653
chr1	99730000	99740000	chr1	99950000	99960000	16	0.000258081	0.00739465	99720000	99750000	99900000	99960000	345	0.666667	UI_1654
chr1	154570000	154580000	chr1	154940000	154950000	25	1.19147988368571e-12	1.95668124720674e-10	154570000	154610000	154900000	154950000	172	0.6	UI_1655
chr1	154580000	154590000	chr1	154900000	154910000	15	1.03309631890339e-06	5.7875580493833e-05	154570000	154610000	154900000	154950000	172	0.6	UI_1656
chr1	156780000	156790000	chr1	156820000	156830000	87	3.15938262672934e-19	1.16662548704192e-16	156760000	156800000	156820000	156850000	724	1	UI_1657
chr1	167770000	167780000	chr1	168050000	168060000	21	9.08446160443013e-09	7.84110203184352e-07	167740000	167800000	168030000	168060000	216	0.666667	UI_1658
chr1	167740000	167750000	chr1	168050000	168060000	16	1.22683062644341e-06	6.75047309037216e-05	167740000	167800000	168030000	168060000	216	0.666667	UI_1659
chr1	169880000	169890000	chr1	170500000	170510000	21	1.90860622495513e-14	4.01670048330693e-12	169840000	169950000	170500000	170520000	182	0.545455	UI_1660
chr1	169850000	169860000	chr1	170500000	170510000	19	8.40328850619817e-12	1.21585270281541e-09	169840000	169950000	170500000	170520000	182	0.545455	UI_1661
chr1	169940000	169950000	chr1	170500000	170510000	18	1.70623615308442e-09	1.68533673782821e-07	169840000	169950000	170500000	170520000	182	0.545455	UI_1662
chr1	169910000	169920000	chr1	170500000	170510000	10	0.000349219	0.00955941	169840000	169950000	170500000	170520000	182	0.545455	UI_1663
chr1	169890000	169900000	chr1	170670000	170680000	21	3.66292647777646e-14	7.42482965395703e-12	169880000	169920000	170650000	170690000	150	0.75	UI_1664
chr1	169960000	169970000	chr1	170500000	170510000	29	1.28885710295546e-20	5.4892276200742e-18	169960000	170020000	170490000	170540000	183	0.433333	UI_1665
chr1	170000000	170010000	chr1	170500000	170510000	22	1.2336467755666e-11	1.74142286143259e-09	169960000	170020000	170490000	170540000	183	0.433333	UI_1666
chr1	169960000	169970000	chr1	170530000	170540000	13	8.2254893945627e-07	4.71427168206548e-05	169960000	170020000	170490000	170540000	183	0.433333	UI_1667
chr1	182190000	182200000	chr1	182360000	182370000	29	1.64900466678512e-13	3.0574672850007e-11	182150000	182210000	182340000	182370000	261	0.666667	UI_1668
chr1	182160000	182170000	chr1	182350000	182360000	22	1.42236159381068e-09	1.42476907512334e-07	182150000	182210000	182340000	182370000	261	0.666667	UI_1669
chr1	182920000	182930000	chr1	183200000	183210000	38	1.27606165269347e-18	4.41258975659121e-16	182910000	182970000	183160000	183220000	245	0.333333	UI_1670
chr1	182960000	182970000	chr1	183200000	183210000	24	2.23579506840666e-09	2.16220095606924e-07	182910000	182970000	183160000	183220000	245	0.333333	UI_1671
chr1	182920000	182930000	chr1	183170000	183180000	22	4.44218759284784e-08	3.34577185646293e-06	182910000	182970000	183160000	183220000	245	0.333333	UI_1672
chr1	186640000	186650000	chr1	186940000	186950000	28	1.14953347934865e-16	3.18426787914847e-14	186630000	186690000	186930000	186980000	213	0.4	UI_1673
chr1	186640000	186650000	chr1	186970000	186980000	12	7.88328381386552e-06	0.000355327	186630000	186690000	186930000	186980000	213	0.4	UI_1674
chr1	186670000	186680000	chr1	186940000	186950000	16	8.10253272693712e-06	0.000364102	186630000	186690000	186930000	186980000	213	0.4	UI_1675
chr1	198120000	198130000	chr1	198650000	198660000	32	8.25230444738576e-25	5.26076267873611e-22	198120000	198160000	198620000	198670000	231	0.6	UI_1676
chr1	198130000	198140000	chr1	198620000	198630000	14	1.02542964378605e-05	0.000448459	198120000	198160000	198620000	198670000	231	0.6	UI_1677
chr1	206670000	206680000	chr1	206750000	206760000	58	1.58858645084715e-19	6.04848890305438e-17	206630000	206690000	206750000	206770000	384	1	UI_1678
chr1	206630000	206640000	chr1	206760000	206770000	22	4.89219183574448e-06	0.000232557	206630000	206690000	206750000	206770000	384	1	UI_1679
chr1	206780000	206790000	chr1	207060000	207070000	39	1.80329194541605e-17	5.48255089045406e-15	206760000	206820000	207060000	207100000	285	0.541667	UI_1680
chr1	206800000	206810000	chr1	207090000	207100000	22	3.00662883325675e-06	0.000150709	206760000	206820000	207060000	207100000	285	0.541667	UI_1681
chr1	208250000	208260000	chr1	208410000	208420000	26	6.04665641744507e-11	7.6583652768301e-09	208240000	208290000	208390000	208420000	318	0.8	UI_1682
chr1	208280000	208290000	chr1	208400000	208410000	31	6.43368782910049e-11	8.11383738300057e-09	208240000	208290000	208390000	208420000	318	0.8	UI_1683
chr1	210060000	210070000	chr1	210100000	210110000	136	1.19983359065845e-32	1.42376862570395e-29	210030000	210080000	210090000	210120000	775	0.8	UI_1684
chr1	210030000	210040000	chr1	210100000	210110000	32	4.2279988272889e-08	3.1981197565405e-06	210030000	210080000	210090000	210120000	775	0.8	UI_1685
chr1	218650000	218660000	chr1	219840000	219850000	20	4.4033910894751e-15	1.00583112821331e-12	218630000	218680000	219810000	219850000	146	0.6	UI_1686
chr1	218640000	218650000	chr1	219810000	219820000	9	2.65712013407537e-05	0.00103578	218630000	218680000	219810000	219850000	146	0.6	UI_1687
chr1	222040000	222050000	chr1	222210000	222220000	44	6.28033915082824e-14	1.23404896221854e-11	221980000	222080000	222210000	222230000	335	0.6	UI_1688
chr1	222070000	222080000	chr1	222210000	222220000	37	8.72413577424306e-13	1.46021272096406e-10	221980000	222080000	222210000	222230000	335	0.6	UI_1689
chr1	222000000	222010000	chr1	222210000	222220000	33	1.16302843941165e-10	1.4060212958809e-08	221980000	222080000	222210000	222230000	335	0.6	UI_1690
chr1	222630000	222640000	chr1	222810000	222820000	40	3.39089117653006e-21	1.53371244042423e-18	222620000	222670000	222780000	222820000	341	0.6	UI_1691
chr1	222660000	222670000	chr1	222790000	222800000	22	1.24786175240844e-07	8.56391840031162e-06	222620000	222670000	222780000	222820000	341	0.6	UI_1692
chr1	222630000	222640000	chr1	222780000	222790000	22	0.000112135	0.00362159	222620000	222670000	222780000	222820000	341	0.6	UI_1693
chr1	225840000	225850000	chr1	225950000	225960000	72	1.29139481035791e-22	6.71709445418015e-20	225810000	225850000	225920000	225970000	516	0.6	UI_1694
chr1	225840000	225850000	chr1	225920000	225930000	56	6.51168318353505e-10	6.92529848230131e-08	225810000	225850000	225920000	225970000	516	0.6	UI_1695
chr1	225810000	225820000	chr1	225950000	225960000	27	9.00663464999399e-08	6.36838183002965e-06	225810000	225850000	225920000	225970000	516	0.6	UI_1696
chr1	225810000	225820000	chr1	225920000	225930000	23	7.20601763240512e-05	0.00247059	225810000	225850000	225920000	225970000	516	0.6	UI_1697
chr1	236270000	236280000	chr1	236650000	236660000	23	2.35850775493018e-15	5.57204464376234e-13	236260000	236310000	236640000	236700000	155	0.4	UI_1698
chr1	236270000	236280000	chr1	236680000	236690000	17	2.43974478319802e-11	3.28654072578947e-09	236260000	236310000	236640000	236700000	155	0.4	UI_1699
chr1	236300000	236310000	chr1	236660000	236670000	11	1.02591308172769e-06	5.75186587726408e-05	236260000	236310000	236640000	236700000	155	0.4	UI_1700
chr1	244090000	244100000	chr1	244430000	244440000	23	1.19672180883131e-14	2.58861450966789e-12	244070000	244140000	244420000	244450000	178	0.571429	UI_1701
chr1	244130000	244140000	chr1	244430000	244440000	14	1.69628464408605e-06	9.02338454433545e-05	244070000	244140000	244420000	244450000	178	0.571429	UI_1702
chr1	244760000	244770000	chr1	244960000	244970000	32	1.78438958900791e-15	4.27967474030652e-13	244760000	244780000	244920000	245000000	211	0.75	UI_1703
chr1	244760000	244770000	chr1	244990000	245000000	16	4.29771796133951e-06	0.000207262	244760000	244780000	244920000	245000000	211	0.75	UI_1704
chr1	244770000	244780000	chr1	244930000	244940000	13	1.43041986678124e-05	0.000601504	244760000	244780000	244920000	245000000	211	0.75	UI_1705
chr1	245250000	245260000	chr1	246030000	246040000	29	2.11803558467352e-21	9.79028216795048e-19	245220000	245270000	246010000	246060000	156	0.48	UI_1706
chr1	245220000	245230000	chr1	246030000	246040000	10	0.000140188	0.00438688	245220000	245270000	246010000	246060000	156	0.48	UI_1707
chr1	245310000	245320000	chr1	246590000	246600000	25	1.15074361045582e-22	6.01534742997358e-20	245300000	245330000	246590000	246660000	160	0.571429	UI_1708
chr1	245310000	245320000	chr1	246650000	246660000	20	7.12486076180018e-17	2.0238934244377e-14	245300000	245330000	246590000	246660000	160	0.571429	UI_1709
chr1	245310000	245320000	chr1	246620000	246630000	10	2.95060446345046e-06	0.000148182	245300000	245330000	246590000	246660000	160	0.571429	UI_1710
chr1	245310000	245320000	chr1	245940000	245950000	21	1.39269810478004e-12	2.26418170654798e-10	245310000	245340000	245910000	245970000	162	0.666667	UI_1711
chr1	245310000	245320000	chr1	245910000	245920000	14	1.4075692874698e-07	9.551184925012e-06	245310000	245340000	245910000	245970000	162	0.666667	UI_1712
chr1	245880000	245890000	chr1	246030000	246040000	42	1.44523753453467e-13	2.7014338167542e-11	245830000	245900000	246020000	246050000	316	0.571429	UI_1713
chr1	245840000	245850000	chr1	246030000	246040000	34	1.21795332652837e-11	1.72060976068172e-09	245830000	245900000	246020000	246050000	316	0.571429	UI_1714
chr1	1250000	1260000	chr1	1290000	1300000	140	2.69614403813444e-22	1.36017567097276e-19	1230000	1280000	1270000	1320000	751	0.48	UI_1715
chr1	1770000	1780000	chr1	1810000	1820000	104	4.30461620526665e-25	2.81083159590415e-22	1770000	1800000	1790000	1840000	794	0.733333	UI_1716
chr1	7280000	7290000	chr1	7360000	7370000	58	8.14704362103054e-13	1.36942906925291e-10	7280000	7300000	7310000	7380000	482	0.785714	UI_1717
chr1	7280000	7290000	chr1	7320000	7330000	67	1.23691664928733e-12	2.02632054556745e-10	7280000	7300000	7310000	7380000	482	0.785714	UI_1718
chr1	12500000	12510000	chr1	12690000	12700000	28	1.91573399344274e-08	1.55285191300292e-06	12500000	12560000	12690000	12720000	272	0.611111	UI_1719
chr1	12540000	12550000	chr1	12710000	12720000	30	9.31525598163892e-08	6.56779955090955e-06	12500000	12560000	12690000	12720000	272	0.611111	UI_1720
chr1	15250000	15260000	chr1	15290000	15300000	187	2.53616696633218e-25	1.68927831635055e-22	15250000	15280000	15290000	15330000	1209	0.916667	UI_1721
chr1	15270000	15280000	chr1	15320000	15330000	82	2.0564871621325e-11	2.80398826042822e-09	15250000	15280000	15290000	15330000	1209	0.916667	UI_1722
chr1	15920000	15930000	chr1	16080000	16090000	41	8.06058317422933e-15	1.78188386905373e-12	15910000	15960000	16060000	16100000	293	0.55	UI_1723
chr1	15950000	15960000	chr1	16070000	16080000	21	7.13387585976318e-05	0.00244905	15910000	15960000	16060000	16100000	293	0.55	UI_1724
chr1	19250000	19260000	chr1	19270000	19280000	239	9.50808540608978e-33	1.13633488444318e-29	19220000	19270000	19260000	19310000	1035	0.44	UI_1725
chr1	19220000	19230000	chr1	19300000	19310000	31	3.58381419185361e-05	0.00134499	19220000	19270000	19260000	19310000	1035	0.44	UI_1726
chr1	23070000	23080000	chr1	23150000	23160000	45	1.18000057150463e-10	1.4249609412574e-08	23050000	23090000	23130000	23160000	375	0.916667	UI_1727
chr1	29210000	29220000	chr1	29440000	29450000	32	2.8894925886566e-14	5.93957721091824e-12	29200000	29260000	29440000	29480000	233	0.5	UI_1728
chr1	29210000	29220000	chr1	29470000	29480000	21	1.09892061893429e-07	7.63050593873286e-06	29200000	29260000	29440000	29480000	233	0.5	UI_1729
chr1	29240000	29250000	chr1	29450000	29460000	18	1.04533512477918e-05	0.000456082	29200000	29260000	29440000	29480000	233	0.5	UI_1730
chr1	45200000	45210000	chr1	45270000	45280000	99	6.20044556247866e-18	1.98458272534329e-15	45170000	45220000	45240000	45290000	623	0.44	UI_1731
chr1	45210000	45220000	chr1	45240000	45250000	90	2.32375087443431e-16	6.20702180000632e-14	45170000	45220000	45240000	45290000	623	0.44	UI_1732
chr1	45170000	45180000	chr1	45270000	45280000	37	0.000312396	0.00869803	45170000	45220000	45240000	45290000	623	0.44	UI_1733
chr1	45270000	45280000	chr1	45980000	45990000	28	3.73836745905309e-18	1.22596765013264e-15	45240000	45300000	45950000	45990000	173	0.5	UI_1734
chr1	45270000	45280000	chr1	45950000	45960000	19	4.73032066437185e-11	6.09478521595643e-09	45240000	45300000	45950000	45990000	173	0.5	UI_1735
chr1	45240000	45250000	chr1	45980000	45990000	15	1.8330275064234e-08	1.49162255951255e-06	45240000	45300000	45950000	45990000	173	0.5	UI_1736
chr1	46130000	46140000	chr1	46330000	46340000	28	1.51324994969561e-12	2.44729760040312e-10	46100000	46160000	46330000	46360000	253	0.611111	UI_1737
chr1	46100000	46110000	chr1	46350000	46360000	19	2.74232306054231e-05	0.00106479	46100000	46160000	46330000	46360000	253	0.611111	UI_1738
chr1	54750000	54760000	chr1	54850000	54860000	35	1.55174582278215e-09	1.54384584739734e-07	54720000	54780000	54830000	54860000	281	0.611111	UI_1739
chr1	54720000	54730000	chr1	54830000	54840000	15	0.000168937	0.00514762	54720000	54780000	54830000	54860000	281	0.611111	UI_1740
chr1	55840000	55850000	chr1	57040000	57050000	26	2.17445004236912e-23	1.2153706406347e-20	55790000	55880000	57030000	57060000	137	0.407407	UI_1741
chr1	55810000	55820000	chr1	57040000	57050000	14	2.6501382263271e-10	3.01611979423493e-08	55790000	55880000	57030000	57060000	137	0.407407	UI_1742
chr1	55870000	55880000	chr1	57040000	57050000	9	6.18069841408812e-05	0.00216296	55790000	55880000	57030000	57060000	137	0.407407	UI_1743
chr1	56180000	56190000	chr1	56530000	56540000	35	2.01132195284674e-17	6.08148655237808e-15	56150000	56200000	56510000	56570000	228	0.366667	UI_1744
chr1	56180000	56190000	chr1	56560000	56570000	22	1.11976556886312e-09	1.14338902815192e-07	56150000	56200000	56510000	56570000	228	0.366667	UI_1745
chr1	56150000	56160000	chr1	56530000	56540000	14	6.13054037976501e-06	0.000284312	56150000	56200000	56510000	56570000	228	0.366667	UI_1746
chr1	59250000	59260000	chr1	59760000	59770000	31	1.03546877350465e-20	4.45385748371656e-18	59200000	59260000	59740000	59800000	212	0.361111	UI_1747
chr1	59220000	59230000	chr1	59760000	59770000	21	1.5237998186861e-11	2.12146433324437e-09	59200000	59260000	59740000	59800000	212	0.361111	UI_1748
chr1	59250000	59260000	chr1	59790000	59800000	17	1.55165930298074e-10	1.83651086515267e-08	59200000	59260000	59740000	59800000	212	0.361111	UI_1749
chr1	59250000	59260000	chr1	59850000	59860000	20	1.36190202242794e-12	2.21768824254181e-10	59240000	59260000	59810000	59870000	163	0.916667	UI_1750
chr1	59240000	59250000	chr1	59820000	59830000	13	2.06861572199805e-07	1.35469497282389e-05	59240000	59260000	59810000	59870000	163	0.916667	UI_1751
chr1	65890000	65900000	chr1	66140000	66150000	28	8.86451822606637e-17	2.48925198562241e-14	65870000	65910000	66120000	66170000	216	0.55	UI_1752
chr1	90310000	90320000	chr1	90370000	90380000	60	9.12057319304876e-11	1.12213529476062e-08	90260000	90330000	90370000	90390000	445	0.785714	UI_1753
chr1	90270000	90280000	chr1	90370000	90380000	43	1.04700478102872e-09	1.07456133519413e-07	90260000	90330000	90370000	90390000	445	0.785714	UI_1754
chr1	92220000	92230000	chr1	92300000	92310000	55	1.81744608028721e-10	2.12542900577312e-08	92220000	92250000	92290000	92340000	530	0.733333	UI_1755
chr1	92220000	92230000	chr1	92330000	92340000	40	4.30414801278735e-09	3.94599673494706e-07	92220000	92250000	92290000	92340000	530	0.733333	UI_1756
chr1	93810000	93820000	chr1	94080000	94090000	36	2.75606995770911e-13	4.95081244927386e-11	93770000	93830000	94060000	94110000	220	0.366667	UI_1757
chr1	93780000	93790000	chr1	94080000	94090000	23	2.15288729049739e-06	0.000111734	93770000	93830000	94060000	94110000	220	0.366667	UI_1758
chr1	109640000	109650000	chr1	109750000	109760000	50	1.71228114204225e-11	2.36466412634751e-09	109610000	109660000	109730000	109760000	415	0.733333	UI_1759
chr1	109610000	109620000	chr1	109750000	109760000	29	0.000209282	0.00618384	109610000	109660000	109730000	109760000	415	0.733333	UI_1760
chr1	118150000	118160000	chr1	118360000	118370000	37	5.3242653736802e-14	1.05653253326074e-11	118140000	118170000	118330000	118400000	250	0.52381	UI_1761
chr1	118150000	118160000	chr1	118330000	118340000	17	1.36832291189277e-05	0.000578306	118140000	118170000	118330000	118400000	250	0.52381	UI_1762
chr1	118150000	118160000	chr1	118390000	118400000	13	9.25125097373389e-05	0.00306678	118140000	118170000	118330000	118400000	250	0.52381	UI_1763
chr1	144690000	144700000	chr1	144990000	145000000	37	2.40877803994724e-17	7.21289454519098e-15	144670000	144710000	144980000	145020000	253	0.6875	UI_1764
chr1	145420000	145430000	chr1	145580000	145590000	29	8.61988396187199e-12	1.24537184530323e-09	145410000	145440000	145540000	145590000	271	0.733333	UI_1765
chr1	145420000	145430000	chr1	145540000	145550000	29	1.43965206993332e-09	1.44069900144964e-07	145410000	145440000	145540000	145590000	271	0.733333	UI_1766
chr1	145620000	145630000	chr1	145650000	145660000	51	6.74373687271453e-11	8.47557237260853e-09	145600000	145640000	145650000	145690000	374	0.6875	UI_1767
chr1	145620000	145630000	chr1	145680000	145690000	31	2.22874781407988e-09	2.15585352147171e-07	145600000	145640000	145650000	145690000	374	0.6875	UI_1768
chr1	150530000	150540000	chr1	150940000	150950000	19	9.16295370545905e-09	7.90260109410783e-07	150500000	150550000	150940000	150990000	161	0.44	UI_1769
chr1	150530000	150540000	chr1	150980000	150990000	19	2.80240339500724e-08	2.1974710268037e-06	150500000	150550000	150940000	150990000	161	0.44	UI_1770
chr1	150500000	150510000	chr1	150970000	150980000	14	2.87860717575458e-06	0.000144979	150500000	150550000	150940000	150990000	161	0.44	UI_1771
chr1	151520000	151530000	chr1	151690000	151700000	26	3.81933184021959e-09	3.53592421974871e-07	151500000	151550000	151680000	151720000	219	0.55	UI_1772
chr1	161750000	161760000	chr1	161970000	161980000	42	5.86355866145593e-20	2.33155253063022e-17	161710000	161800000	161960000	161980000	357	0.611111	UI_1773
chr1	161790000	161800000	chr1	161970000	161980000	37	5.14943641461454e-14	1.02421535664223e-11	161710000	161800000	161960000	161980000	357	0.611111	UI_1774
chr1	161720000	161730000	chr1	161970000	161980000	29	1.94586363055977e-10	2.26468754745973e-08	161710000	161800000	161960000	161980000	357	0.611111	UI_1775
chr1	161760000	161770000	chr1	162000000	162010000	25	6.023404636118e-17	1.72461713896449e-14	161750000	161800000	161990000	162030000	206	0.55	UI_1776
chr1	161790000	161800000	chr1	161990000	162000000	17	2.06302908800095e-07	1.35135910588043e-05	161750000	161800000	161990000	162030000	206	0.55	UI_1777
chr1	161870000	161880000	chr1	161920000	161930000	88	1.09992783644762e-19	4.25319693350996e-17	161870000	161920000	161910000	161940000	939	0.733333	UI_1778
chr1	161910000	161920000	chr1	161930000	161940000	146	2.25511603145697e-10	2.59702747212689e-08	161870000	161920000	161910000	161940000	939	0.733333	UI_1779
chr1	167680000	167690000	chr1	167770000	167780000	51	1.20413311269857e-16	3.3268950532696e-14	167680000	167700000	167740000	167800000	518	0.916667	UI_1780
chr1	167690000	167700000	chr1	167740000	167750000	42	5.65901141742055e-06	0.000264738	167680000	167700000	167740000	167800000	518	0.916667	UI_1781
chr1	169070000	169080000	chr1	169330000	169340000	34	6.56072110770882e-17	1.87094818395308e-14	169070000	169100000	169260000	169340000	237	0.458333	UI_1782
chr1	169070000	169080000	chr1	169280000	169290000	16	4.42853540992089e-08	3.33647613499728e-06	169070000	169100000	169260000	169340000	237	0.458333	UI_1783
chr1	172110000	172120000	chr1	172250000	172260000	52	1.15879884133688e-23	6.63608530814875e-21	172100000	172150000	172220000	172260000	290	0.55	UI_1784
chr1	172110000	172120000	chr1	172220000	172230000	36	1.68616209143502e-10	1.98267242628685e-08	172100000	172150000	172220000	172260000	290	0.55	UI_1785
chr1	172140000	172150000	chr1	172250000	172260000	20	2.4551069830819e-05	0.000966429	172100000	172150000	172220000	172260000	290	0.55	UI_1786
chr1	172900000	172910000	chr1	173380000	173390000	22	1.42684440595506e-12	2.31642045855692e-10	172870000	172910000	173360000	173400000	169	0.6875	UI_1787
chr1	172870000	172880000	chr1	173380000	173390000	20	3.13044936450954e-11	4.14631871881907e-09	172870000	172910000	173360000	173400000	169	0.6875	UI_1788
chr1	176520000	176530000	chr1	176800000	176810000	16	5.69483737784406e-08	4.19425306220191e-06	176520000	176550000	176790000	176860000	148	0.52381	UI_1789
chr1	176530000	176540000	chr1	176850000	176860000	14	6.98137463057942e-08	5.04769775006601e-06	176520000	176550000	176790000	176860000	148	0.52381	UI_1790
chr1	178060000	178070000	chr1	178200000	178210000	49	2.2920984368045e-20	9.50944063871962e-18	178050000	178080000	178200000	178270000	272	0.52381	UI_1791
chr1	178060000	178070000	chr1	178230000	178240000	26	5.04962171108554e-09	4.57197483524017e-07	178050000	178080000	178200000	178270000	272	0.52381	UI_1792
chr1	178060000	178070000	chr1	178260000	178270000	20	1.60095079317671e-07	1.07328540781916e-05	178050000	178080000	178200000	178270000	272	0.52381	UI_1793
chr1	182580000	182590000	chr1	182750000	182760000	49	1.02285478011901e-29	9.79549409419325e-27	182540000	182600000	182720000	182770000	261	0.433333	UI_1794
chr1	182550000	182560000	chr1	182750000	182760000	29	3.92874177996676e-16	1.02031394979192e-13	182540000	182600000	182720000	182770000	261	0.433333	UI_1795
chr1	182590000	182600000	chr1	182720000	182730000	14	0.000358221	0.00976669	182540000	182600000	182720000	182770000	261	0.433333	UI_1796
chr1	183110000	183120000	chr1	183200000	183210000	63	2.28411716121447e-17	6.85977364577685e-15	183090000	183120000	183150000	183220000	479	0.52381	UI_1797
chr1	183110000	183120000	chr1	183160000	183170000	58	9.74014386995588e-09	8.35679903044568e-07	183090000	183120000	183150000	183220000	479	0.52381	UI_1798
chr1	201450000	201460000	chr1	201470000	201480000	364	1.31456508691801e-42	2.96801767147627e-39	201400000	201470000	201470000	201490000	1480	0.785714	UI_1799
chr1	201420000	201430000	chr1	201480000	201490000	91	1.59281390959468e-11	2.21089896785386e-09	201400000	201470000	201470000	201490000	1480	0.785714	UI_1800
chr1	203320000	203330000	chr1	203610000	203620000	63	6.16985406197383e-27	4.72657047544651e-24	203300000	203340000	203580000	203620000	340	0.6875	UI_1801
chr1	203320000	203330000	chr1	203580000	203590000	31	1.14605001509207e-05	0.000494641	203300000	203340000	203580000	203620000	340	0.6875	UI_1802
chr1	218510000	218520000	chr1	219740000	219750000	16	2.54644321152966e-12	3.98132446503846e-10	218480000	218530000	219720000	219760000	132	0.55	UI_1803
chr1	218480000	218490000	chr1	219720000	219730000	8	6.22491127915477e-05	0.00217639	218480000	218530000	219720000	219760000	132	0.55	UI_1804
chr1	219840000	219850000	chr1	219960000	219970000	74	4.49438506716892e-28	3.78609178698827e-25	219830000	219860000	219940000	220000000	373	0.611111	UI_1805
chr1	219840000	219850000	chr1	219990000	220000000	22	0.000305916	0.00854456	219830000	219860000	219940000	220000000	373	0.611111	UI_1806
chr1	224300000	224310000	chr1	224510000	224520000	39	2.78130150647016e-21	1.27062056279345e-18	224290000	224330000	224460000	224530000	269	0.392857	UI_1807
chr1	224300000	224310000	chr1	224480000	224490000	19	1.06726205229229e-07	7.43159036318827e-06	224290000	224330000	224460000	224530000	269	0.392857	UI_1808
chr1	224690000	224700000	chr1	225040000	225050000	20	5.69286337419959e-13	9.79097432855707e-11	224680000	224720000	225020000	225080000	165	0.458333	UI_1809
chr1	224690000	224700000	chr1	225070000	225080000	12	3.91024176321853e-05	0.0014514	224680000	224720000	225020000	225080000	165	0.458333	UI_1810
chr1	234630000	234640000	chr1	234680000	234690000	109	3.70614542027982e-14	7.50603369317242e-12	234630000	234670000	234650000	234710000	1182	0.5	UI_1811
chr1	234660000	234670000	chr1	234700000	234710000	72	1.8464673363524e-07	1.22191884236626e-05	234630000	234670000	234650000	234710000	1182	0.5	UI_1812
chr1	234630000	234640000	chr1	234650000	234660000	179	9.96297784927421e-07	5.60274268371205e-05	234630000	234670000	234650000	234710000	1182	0.5	UI_1813
chr1	234980000	234990000	chr1	235050000	235060000	69	3.85933156635283e-11	5.04075409503241e-09	234980000	235020000	235020000	235070000	759	0.55	UI_1814
chr1	235010000	235020000	chr1	235030000	235040000	118	1.27371510286466e-09	1.28745885116107e-07	234980000	235020000	235020000	235070000	759	0.55	UI_1815
chr1	241770000	241780000	chr1	242160000	242170000	23	8.44180537196422e-12	1.22109523314734e-09	241750000	241810000	242150000	242190000	173	0.458333	UI_1816
chr1	241800000	241810000	chr1	242160000	242170000	16	1.87124254182732e-07	1.23682179557513e-05	241750000	241810000	242150000	242190000	173	0.458333	UI_1817
chr1	1170000	1180000	chr1	1200000	1210000	109	1.06006564494863e-22	5.55600529452932e-20	1120000	1200000	1190000	1220000	705	0.416667	UI_1818
chr1	1130000	1140000	chr1	1200000	1210000	43	2.93528186121532e-07	1.8595969845738e-05	1120000	1200000	1190000	1220000	705	0.416667	UI_1819
chr1	8620000	8630000	chr1	8770000	8780000	43	8.78874790330077e-17	2.46951555291073e-14	8600000	8630000	8760000	8810000	253	0.666667	UI_1820
chr1	8620000	8630000	chr1	8800000	8810000	18	4.32127252794739e-06	0.000208253	8600000	8630000	8760000	8810000	253	0.666667	UI_1821
chr1	14840000	14850000	chr1	15350000	15360000	31	2.33083585507188e-21	1.07326345949803e-18	14840000	14880000	15340000	15400000	155	0.416667	UI_1822
chr1	14870000	14880000	chr1	15350000	15360000	13	5.87122539481881e-07	3.47846180017164e-05	14840000	14880000	15340000	15400000	155	0.416667	UI_1823
chr1	14840000	14850000	chr1	15390000	15400000	12	1.87454249966119e-05	0.000763057	14840000	14880000	15340000	15400000	155	0.416667	UI_1824
chr1	19240000	19250000	chr1	19330000	19340000	79	5.97232492483741e-22	2.91374155236854e-19	19220000	19310000	19330000	19350000	684	0.555556	UI_1825
chr1	19280000	19290000	chr1	19330000	19340000	86	1.02321440180985e-14	2.23212801522294e-12	19220000	19310000	19330000	19350000	684	0.555556	UI_1826
chr1	19770000	19780000	chr1	19810000	19820000	138	1.4691646769208e-16	4.01763459882189e-14	19740000	19790000	19810000	19840000	807	0.666667	UI_1827
chr1	19740000	19750000	chr1	19830000	19840000	43	0.000107339	0.00348747	19740000	19790000	19810000	19840000	807	0.666667	UI_1828
chr1	20920000	20930000	chr1	20940000	20950000	84	2.60154766121864e-12	4.06100849491806e-10	20900000	20940000	20930000	20970000	507	0.625	UI_1829
chr1	22250000	22260000	chr1	22280000	22290000	188	1.39729825947837e-34	1.89673121213629e-31	22220000	22270000	22280000	22300000	970	1	UI_1830
chr1	22220000	22230000	chr1	22290000	22300000	59	1.30845908554023e-15	3.19276196637437e-13	22220000	22270000	22280000	22300000	970	1	UI_1831
chr1	23880000	23890000	chr1	24040000	24050000	44	7.66939669197226e-10	8.05482616384257e-08	23870000	23910000	24030000	24090000	324	0.416667	UI_1832
chr1	23880000	23890000	chr1	24070000	24080000	29	1.22687245470855e-05	0.00052528	23870000	23910000	24030000	24090000	324	0.416667	UI_1833
chr1	26210000	26220000	chr1	26320000	26330000	43	2.54756469292335e-17	7.60760646989876e-15	26200000	26250000	26300000	26330000	393	0.666667	UI_1834
chr1	26240000	26250000	chr1	26310000	26320000	37	1.43620552180652e-13	2.68520821674541e-11	26200000	26250000	26300000	26330000	393	0.666667	UI_1835
chr1	27930000	27940000	chr1	27980000	27990000	78	3.24714706017387e-21	1.47180862509976e-18	27930000	27970000	27960000	28000000	637	0.625	UI_1836
chr1	27960000	27970000	chr1	27980000	27990000	122	1.14667496439573e-18	3.98605192976442e-16	27930000	27970000	27960000	28000000	637	0.625	UI_1837
chr1	28410000	28420000	chr1	28480000	28490000	48	5.15854948773727e-12	7.71004975570334e-10	28410000	28450000	28450000	28490000	513	0.625	UI_1838
chr1	28440000	28450000	chr1	28460000	28470000	73	9.31843905799985e-09	8.02524507567893e-07	28410000	28450000	28450000	28490000	513	0.625	UI_1839
chr1	29210000	29220000	chr1	29520000	29530000	32	1.09259109345433e-17	3.40455370164674e-15	29200000	29230000	29490000	29540000	221	0.666667	UI_1840
chr1	29210000	29220000	chr1	29490000	29500000	22	1.09496279467018e-10	1.32958087882449e-08	29200000	29230000	29490000	29540000	221	0.666667	UI_1841
chr1	31330000	31340000	chr1	31380000	31390000	59	7.14320445804376e-13	1.21091439840777e-10	31320000	31370000	31350000	31390000	579	0.5	UI_1842
chr1	31330000	31340000	chr1	31350000	31360000	63	3.83271950682928e-05	0.00142639	31320000	31370000	31350000	31390000	579	0.5	UI_1843
chr1	31360000	31370000	chr1	31380000	31390000	80	6.29413623747379e-05	0.00219731	31320000	31370000	31350000	31390000	579	0.5	UI_1844
chr1	35910000	35920000	chr1	36020000	36030000	117	6.57631686471226e-63	4.2601356750211e-59	35900000	35930000	35990000	36050000	535	0.555556	UI_1845
chr1	35910000	35920000	chr1	35990000	36000000	54	1.67126151045293e-13	3.09583617286556e-11	35900000	35930000	35990000	36050000	535	0.555556	UI_1846
chr1	42040000	42050000	chr1	42270000	42280000	44	6.52065778089805e-26	4.56919062568584e-23	42030000	42060000	42230000	42290000	220	0.555556	UI_1847
chr1	42030000	42040000	chr1	42240000	42250000	24	2.43870820818587e-11	3.28526850871117e-09	42030000	42060000	42230000	42290000	220	0.555556	UI_1848
chr1	47880000	47890000	chr1	48170000	48180000	21	4.88448411839791e-15	1.10917889115212e-12	47850000	47920000	48160000	48180000	146	0.714286	UI_1849
chr1	47850000	47860000	chr1	48170000	48180000	14	1.86113779997603e-06	9.80449750835884e-05	47850000	47920000	48160000	48180000	146	0.714286	UI_1850
chr1	47910000	47920000	chr1	48160000	48170000	12	7.62624044913479e-05	0.00259449	47850000	47920000	48160000	48180000	146	0.714286	UI_1851
chr1	59280000	59290000	chr1	59850000	59860000	19	5.16645389612947e-11	6.61623078801366e-09	59270000	59290000	59830000	59900000	133	0.714286	UI_1852
chr1	59280000	59290000	chr1	59880000	59890000	13	1.43430554784279e-06	7.76342748284767e-05	59270000	59290000	59830000	59900000	133	0.714286	UI_1853
chr1	61530000	61540000	chr1	62190000	62200000	13	4.26231177787289e-07	2.60526569674737e-05	61500000	61560000	62180000	62220000	106	0.416667	UI_1854
chr1	61500000	61510000	chr1	62200000	62210000	10	9.85044582635714e-06	0.000432757	61500000	61560000	62180000	62220000	106	0.416667	UI_1855
chr1	61510000	61520000	chr1	61760000	61770000	27	2.38943304779187e-14	4.96558776423167e-12	61510000	61530000	61750000	61810000	167	0.833333	UI_1856
chr1	61510000	61520000	chr1	61800000	61810000	19	4.40242093423463e-11	5.69969968260601e-09	61510000	61530000	61750000	61810000	167	0.833333	UI_1857
chr1	66290000	66300000	chr1	66720000	66730000	18	3.2998526011152e-08	2.55042247332142e-06	66260000	66300000	66700000	66750000	129	0.5	UI_1858
chr1	66260000	66270000	chr1	66720000	66730000	12	2.74885191760808e-05	0.00106701	66260000	66300000	66700000	66750000	129	0.5	UI_1859
chr1	68320000	68330000	chr1	68570000	68580000	28	1.83992987130539e-14	3.87926872110494e-12	68300000	68330000	68560000	68600000	157	0.833333	UI_1860
chr1	93810000	93820000	chr1	94300000	94310000	24	1.86835770030582e-11	2.56506982648651e-09	93790000	93830000	94300000	94350000	146	0.5	UI_1861
chr1	93810000	93820000	chr1	94340000	94350000	16	2.63094420951205e-08	2.07436901709833e-06	93790000	93830000	94300000	94350000	146	0.5	UI_1862
chr1	101380000	101390000	chr1	101750000	101760000	21	2.65212434138252e-12	4.13573317729428e-10	101360000	101430000	101750000	101780000	155	0.47619	UI_1863
chr1	101420000	101430000	chr1	101750000	101760000	19	1.80927029545422e-11	2.48922096355322e-09	101360000	101430000	101750000	101780000	155	0.47619	UI_1864
chr1	109750000	109760000	chr1	109940000	109950000	47	9.46318525174255e-24	5.45843997062075e-21	109740000	109760000	109930000	109990000	297	0.833333	UI_1865
chr1	109750000	109760000	chr1	109980000	109990000	25	5.45007806661902e-06	0.000256029	109740000	109760000	109930000	109990000	297	0.833333	UI_1866
chr1	114350000	114360000	chr1	114470000	114480000	50	2.0262922063443e-14	4.25132291060729e-12	114330000	114420000	114470000	114490000	396	0.555556	UI_1867
chr1	114390000	114400000	chr1	114470000	114480000	45	3.25054782244147e-13	5.78234087707483e-11	114330000	114420000	114470000	114490000	396	0.555556	UI_1868
chr1	114520000	114530000	chr1	114820000	114830000	32	7.9107175371862e-18	2.50226205795643e-15	114520000	114530000	114810000	114910000	193	1	UI_1869
chr1	114520000	114530000	chr1	114880000	114890000	20	1.5248486191238e-11	2.1228139610142e-09	114520000	114530000	114810000	114910000	193	1	UI_1870
chr1	114520000	114530000	chr1	114850000	114860000	19	1.4035803596229e-08	1.16812180857433e-06	114520000	114530000	114810000	114910000	193	1	UI_1871
chr1	117610000	117620000	chr1	117660000	117670000	45	3.39425214116149e-11	4.47103363069813e-09	117600000	117630000	117660000	117710000	368	0.666667	UI_1872
chr1	117600000	117610000	chr1	117690000	117700000	30	1.21746264727637e-05	0.00052172	117600000	117630000	117660000	117710000	368	0.666667	UI_1873
chr1	145430000	145440000	chr1	145450000	145460000	180	7.84917215861605e-36	1.16094933334269e-32	145410000	145460000	145440000	145480000	908	0.5	UI_1874
chr1	150540000	150550000	chr1	150780000	150790000	46	1.95868480466908e-19	7.39262126538524e-17	150520000	150560000	150770000	150810000	286	0.625	UI_1875
chr1	150580000	150590000	chr1	150780000	150790000	66	2.24547978775269e-25	1.5023015483885e-22	150570000	150630000	150760000	150790000	364	0.555556	UI_1876
chr1	150620000	150630000	chr1	150780000	150790000	24	5.41888726123139e-05	0.00192913	150570000	150630000	150760000	150790000	364	0.555556	UI_1877
chr1	151440000	151450000	chr1	151510000	151520000	45	6.80016677712091e-11	8.54177618298124e-09	151420000	151450000	151480000	151530000	339	0.666667	UI_1878
chr1	151430000	151440000	chr1	151480000	151490000	37	6.22984751074244e-07	3.66935730003151e-05	151420000	151450000	151480000	151530000	339	0.666667	UI_1879
chr1	156780000	156790000	chr1	156860000	156870000	77	2.52444438814851e-12	3.94837263796714e-10	156750000	156800000	156860000	156900000	599	0.5	UI_1880
chr1	156750000	156760000	chr1	156860000	156870000	58	1.48265787625257e-05	0.000620885	156750000	156800000	156860000	156900000	599	0.5	UI_1881
chr1	156780000	156790000	chr1	156890000	156900000	26	1.62297521290318e-05	0.000672272	156750000	156800000	156860000	156900000	599	0.5	UI_1882
chr1	164600000	164610000	chr1	164670000	164680000	44	3.65047959739567e-08	2.79664103553866e-06	164590000	164640000	164660000	164700000	380	0.5	UI_1883
chr1	164630000	164640000	chr1	164690000	164700000	39	3.3676260272684e-05	0.00127379	164590000	164640000	164660000	164700000	380	0.5	UI_1884
chr1	179050000	179060000	chr1	179330000	179340000	26	3.63578879557173e-13	6.42719858104841e-11	179030000	179100000	179320000	179340000	164	0.714286	UI_1885
chr1	179090000	179100000	chr1	179330000	179340000	17	6.27512404515248e-06	0.000290261	179030000	179100000	179320000	179340000	164	0.714286	UI_1886
chr1	182920000	182930000	chr1	183060000	183070000	54	5.40770637025412e-19	1.94774532751948e-16	182920000	182940000	183060000	183120000	271	0.833333	UI_1887
chr1	182920000	182930000	chr1	183100000	183110000	29	4.23801477989446e-10	4.654866495113e-08	182920000	182940000	183060000	183120000	271	0.833333	UI_1888
chr1	183240000	183250000	chr1	183440000	183450000	68	6.30294677907294e-21	2.7718129782075e-18	183230000	183290000	183420000	183470000	324	0.333333	UI_1889
chr1	183280000	183290000	chr1	183440000	183450000	27	6.43970134031967e-06	0.000297007	183230000	183290000	183420000	183470000	324	0.333333	UI_1890
chr1	184770000	184780000	chr1	184940000	184950000	60	5.38612641862179e-40	1.04490383567756e-36	184760000	184810000	184920000	184970000	281	0.4	UI_1891
chr1	184800000	184810000	chr1	184940000	184950000	29	2.58186656980828e-11	3.46463746316227e-09	184760000	184810000	184920000	184970000	281	0.4	UI_1892
chr1	201570000	201580000	chr1	201590000	201600000	186	4.07868445168888e-15	9.35203582581597e-13	201550000	201580000	201590000	201630000	1055	0.833333	UI_1893
chr1	201550000	201560000	chr1	201620000	201630000	55	5.89898582054126e-06	0.000274713	201550000	201580000	201590000	201630000	1055	0.833333	UI_1894
chr1	205090000	205100000	chr1	205220000	205230000	41	8.11580872883112e-15	1.79353604169663e-12	205070000	205120000	205210000	205240000	286	0.666667	UI_1895
chr1	206860000	206870000	chr1	206880000	206890000	204	1.71914542298781e-22	8.83162303274287e-20	206830000	206880000	206870000	206910000	1104	0.5	UI_1896
chr1	206830000	206840000	chr1	206880000	206890000	63	9.64077461604509e-09	8.279845398482e-07	206830000	206880000	206870000	206910000	1104	0.5	UI_1897
chr1	225880000	225890000	chr1	225950000	225960000	93	1.01912468285565e-26	7.66021067719915e-24	225860000	225890000	225920000	225970000	559	0.666667	UI_1898
chr1	225880000	225890000	chr1	225920000	225930000	84	4.82396548627627e-12	7.24337909218121e-10	225860000	225890000	225920000	225970000	559	0.666667	UI_1899
chr1	227970000	227980000	chr1	228270000	228280000	26	1.03360476072524e-12	1.71301205522373e-10	227940000	228000000	228260000	228280000	151	0.833333	UI_1900
chr1	227940000	227950000	chr1	228260000	228270000	16	5.26920288690935e-08	3.9081700979481e-06	227940000	228000000	228260000	228280000	151	0.833333	UI_1901
chr1	240400000	240410000	chr1	240730000	240740000	20	2.8247836917557e-09	2.67996801643933e-07	240370000	240410000	240730000	240780000	134	0.5	UI_1902
chr1	240390000	240400000	chr1	240760000	240770000	14	3.12579858998501e-06	0.00015605	240370000	240410000	240730000	240780000	134	0.5	UI_1903
chr1	241690000	241700000	chr1	241990000	242000000	15	5.33247236112435e-08	3.95112399544634e-06	241680000	241740000	241990000	242020000	148	0.555556	UI_1904
chr1	241730000	241740000	chr1	242000000	242010000	17	3.96314652584137e-05	0.00146846	241680000	241740000	241990000	242020000	148	0.555556	UI_1905
chr1	8190000	8200000	chr1	8290000	8300000	53	3.48272692415056e-13	6.17103437422485e-11	8190000	8240000	8250000	8300000	387	0.44	UI_1906
chr1	8190000	8200000	chr1	8250000	8260000	59	6.35262924889019e-10	6.7694699867596e-08	8190000	8240000	8250000	8300000	387	0.44	UI_1907
chr1	8220000	8230000	chr1	8290000	8300000	31	7.43546958403935e-05	0.00253851	8190000	8240000	8250000	8300000	387	0.44	UI_1908
chr1	9070000	9080000	chr1	9160000	9170000	33	5.80213036699405e-10	6.22340162081038e-08	9060000	9080000	9120000	9180000	297	0.75	UI_1909
chr1	9070000	9080000	chr1	9120000	9130000	51	6.76960429409927e-08	4.908649027948e-06	9060000	9080000	9120000	9180000	297	0.75	UI_1910
chr1	13910000	13920000	chr1	14090000	14100000	27	4.67443349003219e-08	3.50460352315106e-06	13910000	13950000	14090000	14120000	179	0.75	UI_1911
chr1	13940000	13950000	chr1	14090000	14100000	21	0.000285592	0.00805925	13910000	13950000	14090000	14120000	179	0.75	UI_1912
chr1	15170000	15180000	chr1	15250000	15260000	61	4.09651983114129e-10	4.51075714974437e-08	15130000	15180000	15250000	15280000	386	0.666667	UI_1913
chr1	15130000	15140000	chr1	15250000	15260000	28	0.000146347	0.00455161	15130000	15180000	15250000	15280000	386	0.666667	UI_1914
chr1	15470000	15480000	chr1	15610000	15620000	34	1.9479381376652e-13	3.57405661726321e-11	15450000	15490000	15590000	15630000	259	0.5625	UI_1915
chr1	16040000	16050000	chr1	16070000	16080000	62	1.18356911702717e-09	1.20334574980453e-07	16000000	16050000	16070000	16100000	457	0.6	UI_1916
chr1	16010000	16020000	chr1	16090000	16100000	44	4.36112811442873e-08	3.29016437751568e-06	16000000	16050000	16070000	16100000	457	0.6	UI_1917
chr1	16090000	16100000	chr1	16270000	16280000	36	1.36982600424407e-09	1.37629519539527e-07	16070000	16100000	16270000	16320000	215	0.6	UI_1918
chr1	16090000	16100000	chr1	16310000	16320000	22	2.24426794514416e-07	1.45853578383424e-05	16070000	16100000	16270000	16320000	215	0.6	UI_1919
chr1	21210000	21220000	chr1	21530000	21540000	17	1.14799558536209e-08	9.71161805379292e-07	21170000	21230000	21500000	21540000	150	0.416667	UI_1920
chr1	21190000	21200000	chr1	21500000	21510000	22	2.56010373852355e-08	2.02331775278604e-06	21170000	21230000	21500000	21540000	150	0.416667	UI_1921
chr1	21220000	21230000	chr1	21500000	21510000	20	4.00361544836748e-08	3.04248716353418e-06	21170000	21230000	21500000	21540000	150	0.416667	UI_1922
chr1	29560000	29570000	chr1	30990000	31000000	32	3.45423674594657e-31	3.70214010688635e-28	29540000	29620000	30980000	31000000	152	0.5625	UI_1923
chr1	29590000	29600000	chr1	30990000	31000000	17	6.92343649733173e-13	1.17615744349382e-10	29540000	29620000	30980000	31000000	152	0.5625	UI_1924
chr1	35910000	35920000	chr1	36180000	36190000	48	4.65652110588166e-25	3.03265705450217e-22	35900000	35920000	36170000	36250000	227	0.5625	UI_1925
chr1	35910000	35920000	chr1	36230000	36240000	21	5.96865864581008e-09	5.33004615886194e-07	35900000	35920000	36170000	36250000	227	0.5625	UI_1926
chr1	38460000	38470000	chr1	39320000	39330000	18	1.58729322455285e-12	2.55911091110954e-10	38450000	38490000	39300000	39340000	115	0.5625	UI_1927
chr1	39660000	39670000	chr1	39720000	39730000	83	6.25921367741577e-25	4.02909219769571e-22	39640000	39690000	39720000	39740000	507	0.9	UI_1928
chr1	43250000	43260000	chr1	43530000	43540000	21	9.13892631922976e-12	1.3155630628355e-09	43220000	43260000	43510000	43550000	169	0.5625	UI_1929
chr1	43220000	43230000	chr1	43520000	43530000	16	2.55722058616107e-05	0.00100155	43220000	43260000	43510000	43550000	169	0.5625	UI_1930
chr1	45270000	45280000	chr1	45810000	45820000	27	1.50722768773762e-15	3.65029310104304e-13	45250000	45290000	45790000	45840000	152	0.45	UI_1931
chr1	52390000	52400000	chr1	52430000	52440000	125	1.85651449298932e-27	1.48298915699556e-24	52380000	52420000	52430000	52460000	516	0.75	UI_1932
chr1	53610000	53620000	chr1	53640000	53650000	167	2.67305134113782e-21	1.22378082523435e-18	53600000	53630000	53620000	53670000	1016	0.6	UI_1933
chr1	53720000	53730000	chr1	54200000	54210000	20	1.24589089905852e-09	1.26124159570899e-07	53700000	53760000	54190000	54210000	140	0.75	UI_1934
chr1	53750000	53760000	chr1	54200000	54210000	15	2.57250576517865e-06	0.000131062	53700000	53760000	54190000	54210000	140	0.75	UI_1935
chr1	54730000	54740000	chr1	54870000	54880000	59	9.15442448269308e-26	6.33135957083637e-23	54710000	54780000	54850000	54880000	307	0.666667	UI_1936
chr1	54760000	54770000	chr1	54870000	54880000	30	1.16535807980325e-06	6.44678848048202e-05	54710000	54780000	54850000	54880000	307	0.666667	UI_1937
chr1	55410000	55420000	chr1	55480000	55490000	54	2.51880591982436e-24	1.53490186012989e-21	55400000	55420000	55440000	55490000	343	0.9	UI_1938
chr1	55410000	55420000	chr1	55450000	55460000	39	1.28583522318792e-08	1.07803968703922e-06	55400000	55420000	55440000	55490000	343	0.9	UI_1939
chr1	55890000	55900000	chr1	57040000	57050000	30	2.50082581313445e-27	1.97801820836509e-24	55890000	55920000	57020000	57070000	136	0.6	UI_1940
chr1	59840000	59850000	chr1	60220000	60230000	19	7.06098489144799e-10	7.46288717521519e-08	59820000	59860000	60190000	60230000	122	0.5625	UI_1941
chr1	59850000	59860000	chr1	60190000	60200000	15	5.74070435612546e-06	0.000268156	59820000	59860000	60190000	60230000	122	0.5625	UI_1942
chr1	64140000	64150000	chr1	64380000	64390000	25	7.44288272864173e-13	1.25866344568105e-10	64120000	64160000	64370000	64400000	157	0.75	UI_1943
chr1	64380000	64390000	chr1	64600000	64610000	34	2.35771998694781e-18	7.90179894342084e-16	64370000	64410000	64580000	64610000	179	0.75	UI_1944
chr1	65360000	65370000	chr1	65380000	65390000	171	1.31989363431126e-13	2.47979647975688e-11	65340000	65390000	65370000	65410000	807	0.45	UI_1945
chr1	66790000	66800000	chr1	66950000	66960000	43	1.42520444194917e-09	1.42742956799273e-07	66790000	66840000	66950000	66980000	275	0.6	UI_1946
chr1	66830000	66840000	chr1	66960000	66970000	30	8.03311940120584e-06	0.000361331	66790000	66840000	66950000	66980000	275	0.6	UI_1947
chr1	85780000	85790000	chr1	86150000	86160000	20	5.37547086561726e-09	4.84249770379501e-07	85760000	85800000	86120000	86180000	162	0.375	UI_1948
chr1	85770000	85780000	chr1	86120000	86130000	22	1.70390429917921e-07	1.13614568456347e-05	85760000	85800000	86120000	86180000	162	0.375	UI_1949
chr1	87610000	87620000	chr1	87690000	87700000	50	1.43248791946527e-13	2.67858536052646e-11	87580000	87620000	87690000	87720000	274	0.75	UI_1950
chr1	87580000	87590000	chr1	87690000	87700000	25	3.77476163134804e-05	0.00140732	87580000	87620000	87690000	87720000	274	0.75	UI_1951
chr1	87800000	87810000	chr1	88260000	88270000	18	1.16059481800667e-11	1.64470607264911e-09	87790000	87810000	88220000	88290000	115	0.642857	UI_1952
chr1	87790000	87800000	chr1	88220000	88230000	12	6.35443481816286e-06	0.000293521	87790000	87810000	88220000	88290000	115	0.642857	UI_1953
chr1	92190000	92200000	chr1	92290000	92300000	50	9.40774682278648e-10	9.73277910641855e-08	92190000	92210000	92290000	92340000	288	0.9	UI_1954
chr1	92200000	92210000	chr1	92330000	92340000	26	7.39698572800025e-07	4.2838982765487e-05	92190000	92210000	92290000	92340000	288	0.9	UI_1955
chr1	93340000	93350000	chr1	93400000	93410000	46	6.0065490974264e-12	8.89088308399696e-10	93310000	93350000	93400000	93430000	295	0.75	UI_1956
chr1	93310000	93320000	chr1	93410000	93420000	41	4.09753096400404e-08	3.10729949554005e-06	93310000	93350000	93400000	93430000	295	0.75	UI_1957
chr1	94040000	94050000	chr1	94070000	94080000	139	6.29708546726814e-16	1.5944226366272e-13	94030000	94070000	94060000	94090000	1074	0.75	UI_1958
chr1	95190000	95200000	chr1	95260000	95270000	67	3.64578502265895e-17	1.07109927184819e-14	95190000	95240000	95240000	95270000	583	0.6	UI_1959
chr1	95230000	95240000	chr1	95250000	95260000	109	2.23662341519176e-06	0.000115614	95190000	95240000	95240000	95270000	583	0.6	UI_1960
chr1	101080000	101090000	chr1	101320000	101330000	41	2.01379530834966e-26	1.47590537898942e-23	101060000	101100000	101310000	101340000	200	0.75	UI_1961
chr1	115870000	115880000	chr1	115970000	115980000	122	7.1599301923859e-42	1.55422538899047e-38	115860000	115910000	115950000	115980000	524	0.6	UI_1962
chr1	115900000	115910000	chr1	115960000	115970000	29	0.00019236	0.00575424	115860000	115910000	115950000	115980000	524	0.6	UI_1963
chr1	117670000	117680000	chr1	117810000	117820000	27	3.08015410524619e-14	6.30544127516779e-12	117660000	117710000	117810000	117840000	245	0.6	UI_1964
chr1	117700000	117710000	chr1	117810000	117820000	18	7.8357518489051e-05	0.00265631	117660000	117710000	117810000	117840000	245	0.6	UI_1965
chr1	146640000	146650000	chr1	146710000	146720000	73	1.48923318095902e-28	1.3034046659954e-25	146630000	146660000	146710000	146770000	299	0.5	UI_1966
chr1	146640000	146650000	chr1	146760000	146770000	36	5.05958212672057e-09	4.5803053158801e-07	146630000	146660000	146710000	146770000	299	0.5	UI_1967
chr1	149870000	149880000	chr1	149890000	149900000	106	1.68622006137171e-17	5.1425514232573e-15	149850000	149880000	149870000	149910000	571	0.75	UI_1968
chr1	153640000	153650000	chr1	153950000	153960000	22	2.61278919675566e-10	2.97662201973217e-08	153620000	153670000	153930000	153970000	148	0.45	UI_1969
chr1	162820000	162830000	chr1	163030000	163040000	44	1.55400533262574e-25	1.05385545123008e-22	162810000	162830000	163000000	163060000	228	0.75	UI_1970
chr1	162820000	162830000	chr1	163000000	163010000	24	3.72531657396244e-08	2.84899438058041e-06	162810000	162830000	163000000	163060000	228	0.75	UI_1971
chr1	168430000	168440000	chr1	169330000	169340000	27	1.00718646608383e-22	5.28974292419897e-20	168380000	168470000	169330000	169340000	130	1	UI_1972
chr1	168380000	168390000	chr1	169330000	169340000	17	1.19315890016211e-11	1.68767799988951e-09	168380000	168470000	169330000	169340000	130	1	UI_1973
chr1	168460000	168470000	chr1	169330000	169340000	11	4.38816086724651e-06	0.000211105	168380000	168470000	169330000	169340000	130	1	UI_1974
chr1	168690000	168700000	chr1	169330000	169340000	22	4.96670756597066e-15	1.12656497479974e-12	168660000	168710000	169300000	169340000	130	0.45	UI_1975
chr1	168660000	168670000	chr1	169330000	169340000	10	7.61948608611954e-05	0.00259251	168660000	168710000	169300000	169340000	130	0.45	UI_1976
chr1	168670000	168680000	chr1	169300000	169310000	9	0.000320408	0.00888824	168660000	168710000	169300000	169340000	130	0.45	UI_1977
chr1	170630000	170640000	chr1	170890000	170900000	40	2.15503636170414e-17	6.49125089550792e-15	170630000	170710000	170880000	170900000	239	0.5625	UI_1978
chr1	170680000	170690000	chr1	170890000	170900000	28	1.3170987464576e-09	1.32780944625253e-07	170630000	170710000	170880000	170900000	239	0.5625	UI_1979
chr1	172710000	172720000	chr1	173170000	173180000	42	3.47064854650061e-36	5.25395373763255e-33	172700000	172750000	173160000	173190000	184	0.6	UI_1980
chr1	172740000	172750000	chr1	173160000	173170000	17	9.97981824102813e-10	1.02768000131458e-07	172700000	172750000	173160000	173190000	184	0.6	UI_1981
chr1	174750000	174760000	chr1	174960000	174970000	43	1.98354434675101e-23	1.1124461435831e-20	174730000	174770000	174940000	174970000	277	0.75	UI_1982
chr1	178000000	178010000	chr1	178230000	178240000	21	5.01848308906955e-11	6.43969139231778e-09	178000000	178030000	178200000	178270000	174	0.52381	UI_1983
chr1	178020000	178030000	chr1	178200000	178210000	25	5.26710221592233e-09	4.75187806971611e-07	178000000	178030000	178200000	178270000	174	0.52381	UI_1984
chr1	178000000	178010000	chr1	178260000	178270000	13	3.55070797174237e-06	0.000174826	178000000	178030000	178200000	178270000	174	0.52381	UI_1985
chr1	201410000	201420000	chr1	201430000	201440000	205	2.12058088886222e-23	1.18662571790375e-20	201390000	201440000	201420000	201460000	1165	0.45	UI_1986
chr1	203010000	203020000	chr1	203170000	203180000	26	5.21172725549205e-14	1.03566116227078e-11	202990000	203030000	203160000	203200000	194	0.5625	UI_1987
chr1	204040000	204050000	chr1	204090000	204100000	69	6.25008530898969e-16	1.5832343477018e-13	204020000	204060000	204070000	204110000	439	0.5625	UI_1988
chr1	204240000	204250000	chr1	204280000	204290000	65	1.66033063971792e-13	3.07708013804661e-11	204240000	204280000	204260000	204300000	632	0.5625	UI_1989
chr1	204270000	204280000	chr1	204290000	204300000	98	3.00177898689286e-08	2.33935036257022e-06	204240000	204280000	204260000	204300000	632	0.5625	UI_1990
chr1	207990000	208000000	chr1	208380000	208390000	24	1.01138913603553e-09	1.04040442524516e-07	207980000	208010000	208370000	208420000	157	0.6	UI_1991
chr1	208000000	208010000	chr1	208410000	208420000	15	1.57135334765998e-06	8.42645697796816e-05	207980000	208010000	208370000	208420000	157	0.6	UI_1992
chr1	210430000	210440000	chr1	210460000	210470000	249	1.38566747157022e-56	6.71193475690607e-53	210400000	210450000	210460000	210490000	832	0.666667	UI_1993
chr1	210400000	210410000	chr1	210460000	210470000	70	3.60276345997798e-16	9.40359597807975e-14	210400000	210450000	210460000	210490000	832	0.666667	UI_1994
chr1	212230000	212240000	chr1	212620000	212630000	28	1.48051246260948e-16	4.0461837368406e-14	212200000	212260000	212600000	212630000	145	0.555556	UI_1995
chr1	212200000	212210000	chr1	212620000	212630000	17	3.90955185659057e-09	3.6120082193773e-07	212200000	212260000	212600000	212630000	145	0.555556	UI_1996
chr1	212730000	212740000	chr1	212760000	212770000	150	2.09045400100067e-18	7.04581025425133e-16	212710000	212750000	212750000	212790000	716	0.5625	UI_1997
chr1	221050000	221060000	chr1	221560000	221570000	27	1.15429024133332e-16	3.19661643422615e-14	221040000	221090000	221540000	221570000	128	0.6	UI_1998
chr1	221080000	221090000	chr1	221560000	221570000	14	4.18982388902557e-06	0.000202631	221040000	221090000	221540000	221570000	128	0.6	UI_1999
[truncated: 141,883 more rows]

## Sheet: HCMV loops - FDR < 0.01
chr1	s1	e1	chr2	s2	e2	cc	P-Value_Bias	Q-Value_Bias	bin1_low	bin1_high	bin2_low	bin2_high	sumCC	StrongConn	loop_name
chr1	8070000	8080000	chr1	8370000	8380000	110	7.66779701735468e-112	7.36907377044779e-107	8010000	8210000	8240000	8440000	4493	0.4275	HCMV_1
chr1	8040000	8050000	chr1	8400000	8410000	46	6.61546421624957e-41	2.21341310890614e-37	8010000	8210000	8240000	8440000	4493	0.4275	HCMV_2
chr1	8030000	8040000	chr1	8370000	8380000	52	2.06105521056396e-37	5.26908584229328e-34	8010000	8210000	8240000	8440000	4493	0.4275	HCMV_3
chr1	8070000	8080000	chr1	8400000	8410000	47	4.71887808746184e-37	1.17112805310289e-33	8010000	8210000	8240000	8440000	4493	0.4275	HCMV_4
chr1	8150000	8160000	chr1	8250000	8260000	96	4.47267872225201e-24	3.76360352853381e-21	8010000	8210000	8240000	8440000	4493	0.4275	HCMV_5
chr1	8150000	8160000	chr1	8370000	8380000	49	5.38629209067376e-24	4.49766042692692e-21	8010000	8210000	8240000	8440000	4493	0.4275	HCMV_6
chr1	8100000	8110000	chr1	8370000	8380000	38	1.11398002518199e-23	8.98555356992511e-21	8010000	8210000	8240000	8440000	4493	0.4275	HCMV_7
chr1	8080000	8090000	chr1	8270000	8280000	49	1.1542650458532e-23	9.28895685894449e-21	8010000	8210000	8240000	8440000	4493	0.4275	HCMV_8
chr1	8150000	8160000	chr1	8330000	8340000	37	2.17042767683494e-17	8.76416728025922e-15	8010000	8210000	8240000	8440000	4493	0.4275	HCMV_9
chr1	8150000	8160000	chr1	8290000	8300000	49	2.27836115250132e-16	8.05974864738467e-14	8010000	8210000	8240000	8440000	4493	0.4275	HCMV_10
chr1	8100000	8110000	chr1	8400000	8410000	26	1.66807034760364e-15	5.26533084278858e-13	8010000	8210000	8240000	8440000	4493	0.4275	HCMV_11
chr1	8190000	8200000	chr1	8360000	8370000	34	6.54839177522254e-14	1.6468878368604e-11	8010000	8210000	8240000	8440000	4493	0.4275	HCMV_12
chr1	8080000	8090000	chr1	8300000	8310000	26	4.01537554578618e-13	8.99686291356142e-11	8010000	8210000	8240000	8440000	4493	0.4275	HCMV_13
chr1	8120000	8130000	chr1	8250000	8260000	47	5.02736676396177e-13	1.11005394963276e-10	8010000	8210000	8240000	8440000	4493	0.4275	HCMV_14
chr1	8080000	8090000	chr1	8340000	8350000	27	4.59567127794347e-12	8.75150727911728e-10	8010000	8210000	8240000	8440000	4493	0.4275	HCMV_15
chr1	8120000	8130000	chr1	8290000	8300000	27	6.55393419005233e-10	8.5967706304507e-08	8010000	8210000	8240000	8440000	4493	0.4275	HCMV_16
chr1	8150000	8160000	chr1	8400000	8410000	23	1.33271420937428e-08	1.34818675481634e-06	8010000	8210000	8240000	8440000	4493	0.4275	HCMV_17
chr1	8060000	8070000	chr1	8430000	8440000	16	1.03583763914113e-07	8.63602170810262e-06	8010000	8210000	8240000	8440000	4493	0.4275	HCMV_18
chr1	8040000	8050000	chr1	8250000	8260000	23	6.25707142025918e-07	4.33790557209729e-05	8010000	8210000	8240000	8440000	4493	0.4275	HCMV_19
chr1	8080000	8090000	chr1	8240000	8250000	24	8.16785131730341e-07	5.50202127289779e-05	8010000	8210000	8240000	8440000	4493	0.4275	HCMV_20
chr1	8010000	8020000	chr1	8400000	8410000	12	8.07344778340237e-06	0.000415934	8010000	8210000	8240000	8440000	4493	0.4275	HCMV_21
chr1	8040000	8050000	chr1	8340000	8350000	14	3.12018553844082e-05	0.00134638	8010000	8210000	8240000	8440000	4493	0.4275	HCMV_22
chr1	85770000	85780000	chr1	86040000	86050000	201	1.12002016559955e-177	9.08948383098392e-172	85720000	86000000	85910000	86180000	7205	0.231481	HCMV_23
chr1	85770000	85780000	chr1	85960000	85970000	126	2.67722749569317e-73	5.21446669223686e-69	85720000	86000000	85910000	86180000	7205	0.231481	HCMV_24
chr1	85770000	85780000	chr1	86070000	86080000	94	9.39143296468908e-66	1.25861020690983e-61	85720000	86000000	85910000	86180000	7205	0.231481	HCMV_25
chr1	85800000	85810000	chr1	86040000	86050000	107	5.08739743491248e-58	4.52042989026899e-54	85720000	86000000	85910000	86180000	7205	0.231481	HCMV_26
chr1	85770000	85780000	chr1	86160000	86170000	64	2.32329011075009e-49	1.3340503505605e-45	85720000	86000000	85910000	86180000	7205	0.231481	HCMV_27
chr1	85770000	85780000	chr1	85920000	85930000	93	8.83381076053028e-40	2.72702575749919e-36	85720000	86000000	85910000	86180000	7205	0.231481	HCMV_28
chr1	85740000	85750000	chr1	86040000	86050000	66	4.09350001646395e-38	1.10571702859657e-34	85720000	86000000	85910000	86180000	7205	0.231481	HCMV_29
chr1	85960000	85970000	chr1	86040000	86050000	145	2.5962899506105e-29	3.49957366037012e-26	85720000	86000000	85910000	86180000	7205	0.231481	HCMV_30
chr1	85770000	85780000	chr1	86010000	86020000	68	7.2710698347099e-27	7.92882917960506e-24	85720000	86000000	85910000	86180000	7205	0.231481	HCMV_31
chr1	85920000	85930000	chr1	86040000	86050000	87	1.23011092578942e-23	9.87756083209105e-21	85720000	86000000	85910000	86180000	7205	0.231481	HCMV_32
chr1	85740000	85750000	chr1	86070000	86080000	43	2.22789765927017e-22	1.57601760926889e-19	85720000	86000000	85910000	86180000	7205	0.231481	HCMV_33
chr1	85860000	85870000	chr1	86040000	86050000	75	1.12781259327191e-19	5.97826453343884e-17	85720000	86000000	85910000	86180000	7205	0.231481	HCMV_34
chr1	85810000	85820000	chr1	85960000	85970000	48	1.81307074823991e-16	6.50163004386437e-14	85720000	86000000	85910000	86180000	7205	0.231481	HCMV_35
chr1	85780000	85790000	chr1	86120000	86130000	31	3.34971324235625e-14	8.80928630169018e-12	85720000	86000000	85910000	86180000	7205	0.231481	HCMV_36
chr1	85800000	85810000	chr1	86070000	86080000	41	1.35873510023852e-13	3.2694504038558e-11	85720000	86000000	85910000	86180000	7205	0.231481	HCMV_37
chr1	85830000	85840000	chr1	86040000	86050000	39	2.45561315183211e-08	2.34796003308154e-06	85720000	86000000	85910000	86180000	7205	0.231481	HCMV_38
chr1	85810000	85820000	chr1	85930000	85940000	33	4.98754085748886e-08	4.46506956682784e-06	85720000	86000000	85910000	86180000	7205	0.231481	HCMV_39
chr1	85810000	85820000	chr1	86150000	86160000	15	1.43216834758228e-07	1.15602857601579e-05	85720000	86000000	85910000	86180000	7205	0.231481	HCMV_40
chr1	85740000	85750000	chr1	85960000	85970000	29	5.02724118022162e-07	3.56881219554121e-05	85720000	86000000	85910000	86180000	7205	0.231481	HCMV_41
chr1	85740000	85750000	chr1	85990000	86000000	24	1.44401302681288e-06	9.12792544854263e-05	85720000	86000000	85910000	86180000	7205	0.231481	HCMV_42
chr1	85890000	85900000	chr1	86040000	86050000	44	6.5359471007935e-06	0.000345625	85720000	86000000	85910000	86180000	7205	0.231481	HCMV_43
chr1	85990000	86000000	chr1	86040000	86050000	106	2.27884601021139e-05	0.00102646	85720000	86000000	85910000	86180000	7205	0.231481	HCMV_44
chr1	85740000	85750000	chr1	86100000	86110000	13	0.000212174	0.00689574	85720000	86000000	85910000	86180000	7205	0.231481	HCMV_45
chr1	94510000	94520000	chr1	94790000	94800000	106	1.27333870653831e-96	6.59600106296587e-92	94430000	94740000	94630000	94830000	4053	0.204839	HCMV_46
chr1	94520000	94530000	chr1	94700000	94710000	63	1.54239178220006e-39	4.65901699795827e-36	94430000	94740000	94630000	94830000	4053	0.204839	HCMV_47
chr1	94700000	94710000	chr1	94790000	94800000	63	2.20547335345836e-22	1.56091051597334e-19	94430000	94740000	94630000	94830000	4053	0.204839	HCMV_48
chr1	94530000	94540000	chr1	94640000	94650000	58	1.38915833825892e-21	9.03660366196954e-19	94430000	94740000	94630000	94830000	4053	0.204839	HCMV_49
chr1	94530000	94540000	chr1	94760000	94770000	34	1.73726108031299e-16	6.24879960366272e-14	94430000	94740000	94630000	94830000	4053	0.204839	HCMV_50
chr1	94480000	94490000	chr1	94800000	94810000	24	2.48988061638382e-15	7.68634144203586e-13	94430000	94740000	94630000	94830000	4053	0.204839	HCMV_51
chr1	94520000	94530000	chr1	94730000	94740000	31	3.3166786647496e-14	8.72712335171143e-12	94430000	94740000	94630000	94830000	4053	0.204839	HCMV_52
chr1	94650000	94660000	chr1	94790000	94800000	43	4.87990432966479e-11	7.84142673289844e-09	94430000	94740000	94630000	94830000	4053	0.204839	HCMV_53
chr1	94510000	94520000	chr1	94820000	94830000	24	8.85630462909897e-11	1.35885811385752e-08	94430000	94740000	94630000	94830000	4053	0.204839	HCMV_54
chr1	94570000	94580000	chr1	94790000	94800000	31	1.29580300513531e-10	1.93195184503906e-08	94430000	94740000	94630000	94830000	4053	0.204839	HCMV_55
chr1	94730000	94740000	chr1	94790000	94800000	54	1.62046524075798e-10	2.37293901927635e-08	94430000	94740000	94630000	94830000	4053	0.204839	HCMV_56
chr1	94540000	94550000	chr1	94790000	94800000	26	3.50080137762513e-09	3.98882520263653e-07	94430000	94740000	94630000	94830000	4053	0.204839	HCMV_57
chr1	94530000	94540000	chr1	94670000	94680000	37	2.22992125933755e-08	2.15097235579403e-06	94430000	94740000	94630000	94830000	4053	0.204839	HCMV_58
chr1	94620000	94630000	chr1	94790000	94800000	32	4.11246182581661e-08	3.75004169316273e-06	94430000	94740000	94630000	94830000	4053	0.204839	HCMV_59
chr1	94490000	94500000	chr1	94710000	94720000	19	1.63284674648848e-07	1.30099037230486e-05	94430000	94740000	94630000	94830000	4053	0.204839	HCMV_60
chr1	94440000	94450000	chr1	94780000	94790000	16	1.36300139745854e-05	0.000656723	94430000	94740000	94630000	94830000	4053	0.204839	HCMV_61
chr1	94500000	94510000	chr1	94760000	94770000	14	1.58732088486116e-05	0.000749419	94430000	94740000	94630000	94830000	4053	0.204839	HCMV_62
chr1	94500000	94510000	chr1	94640000	94650000	18	6.88413560617153e-05	0.00265217	94430000	94740000	94630000	94830000	4053	0.204839	HCMV_63
chr1	225660000	225670000	chr1	225960000	225970000	80	1.54896363757537e-74	3.20495846850771e-70	225640000	225850000	225900000	226130000	2862	0.271222	HCMV_64
chr1	225690000	225700000	chr1	225960000	225970000	57	2.64414638001192e-39	7.84747189744167e-36	225640000	225850000	225900000	226130000	2862	0.271222	HCMV_65
chr1	225840000	225850000	chr1	225950000	225960000	95	2.70637352284721e-39	8.01911979239234e-36	225640000	225850000	225900000	226130000	2862	0.271222	HCMV_66
chr1	225750000	225760000	chr1	225950000	225960000	42	1.25072960578849e-25	1.21689442931283e-22	225640000	225850000	225900000	226130000	2862	0.271222	HCMV_67
chr1	225660000	225670000	chr1	226000000	226010000	28	1.2862018334715e-20	7.57117401928232e-18	225640000	225850000	225900000	226130000	2862	0.271222	HCMV_68
chr1	225650000	225660000	chr1	226110000	226120000	26	3.6990019903216e-19	1.84783579913452e-16	225640000	225850000	225900000	226130000	2862	0.271222	HCMV_69
chr1	225660000	225670000	chr1	226030000	226040000	22	2.49821151015843e-16	8.79318202344626e-14	225640000	225850000	225900000	226130000	2862	0.271222	HCMV_70
chr1	225720000	225730000	chr1	225960000	225970000	35	2.97679798939253e-15	9.08631369442352e-13	225640000	225850000	225900000	226130000	2862	0.271222	HCMV_71
chr1	225690000	225700000	chr1	226000000	226010000	24	2.21881500133843e-14	5.9918078999319e-12	225640000	225850000	225900000	226130000	2862	0.271222	HCMV_72
chr1	225660000	225670000	chr1	226070000	226080000	17	5.9591433288429e-11	9.4279543872364e-09	225640000	225850000	225900000	226130000	2862	0.271222	HCMV_73
chr1	225800000	225810000	chr1	225950000	225960000	34	3.3774546896538e-08	3.1370286381661e-06	225640000	225850000	225900000	226130000	2862	0.271222	HCMV_74
chr1	225650000	225660000	chr1	225930000	225940000	16	7.31097260596416e-07	4.98341104908015e-05	225640000	225850000	225900000	226130000	2862	0.271222	HCMV_75
chr1	225690000	225700000	chr1	225910000	225920000	21	8.00861704302083e-07	5.40602596769252e-05	225640000	225850000	225900000	226130000	2862	0.271222	HCMV_76
chr1	225840000	225850000	chr1	225910000	225920000	58	1.86441156803276e-06	0.000114519	225640000	225850000	225900000	226130000	2862	0.271222	HCMV_77
chr1	225750000	225760000	chr1	225920000	225930000	18	2.77816246934322e-06	0.000162784	225640000	225850000	225900000	226130000	2862	0.271222	HCMV_78
chr1	234740000	234750000	chr1	235110000	235120000	110	3.17398819594899e-101	2.08851797443057e-96	234700000	234840000	234960000	235190000	2703	0.34472	HCMV_79
chr1	234740000	234750000	chr1	235180000	235190000	76	1.3870616899695e-70	2.38126042082379e-66	234700000	234840000	234960000	235190000	2703	0.34472	HCMV_80
chr1	234740000	234750000	chr1	235150000	235160000	59	2.54724131424724e-44	1.06252665251137e-40	234700000	234840000	234960000	235190000	2703	0.34472	HCMV_81
chr1	234740000	234750000	chr1	235010000	235020000	74	1.04434948177716e-40	3.44683370006456e-37	234700000	234840000	234960000	235190000	2703	0.34472	HCMV_82
chr1	234740000	234750000	chr1	235040000	235050000	53	1.73068455388729e-37	4.45254598994694e-34	234700000	234840000	234960000	235190000	2703	0.34472	HCMV_83
chr1	234740000	234750000	chr1	235070000	235080000	42	9.34142877525811e-25	8.40465998735226e-22	234700000	234840000	234960000	235190000	2703	0.34472	HCMV_84
chr1	234740000	234750000	chr1	234980000	234990000	52	7.95197958919193e-21	4.79292018956358e-18	234700000	234840000	234960000	235190000	2703	0.34472	HCMV_85
chr1	234790000	234800000	chr1	235100000	235110000	20	2.87177930016134e-08	2.70599382337072e-06	234700000	234840000	234960000	235190000	2703	0.34472	HCMV_86
chr1	234830000	234840000	chr1	235180000	235190000	20	1.8223662930237e-07	1.4352552831289e-05	234700000	234840000	234960000	235190000	2703	0.34472	HCMV_87
chr1	234780000	234790000	chr1	235180000	235190000	17	1.92529417010384e-07	1.50776719501597e-05	234700000	234840000	234960000	235190000	2703	0.34472	HCMV_88
chr1	234700000	234710000	chr1	235110000	235120000	18	2.31785402343632e-07	1.78065672246345e-05	234700000	234840000	234960000	235190000	2703	0.34472	HCMV_89
chr1	234780000	234790000	chr1	235130000	235140000	15	1.55761618394154e-05	0.000737389	234700000	234840000	234960000	235190000	2703	0.34472	HCMV_90
chr1	234740000	234750000	chr1	235240000	235250000	142	2.3186497613981e-178	2.11690346599641e-172	234600000	234920000	235240000	235300000	2254	0.515625	HCMV_91
chr1	234630000	234640000	chr1	235240000	235250000	85	4.81633778661609e-102	3.28767628539677e-97	234600000	234920000	235240000	235300000	2254	0.515625	HCMV_92
chr1	234900000	234910000	chr1	235240000	235250000	42	1.431414770792e-28	1.81603892823582e-25	234600000	234920000	235240000	235300000	2254	0.515625	HCMV_93
chr1	234860000	234870000	chr1	235240000	235250000	35	2.79995720033002e-24	2.40397999232633e-21	234600000	234920000	235240000	235300000	2254	0.515625	HCMV_94
chr1	234740000	234750000	chr1	235280000	235290000	32	5.39493604451463e-21	3.30377886177406e-18	234600000	234920000	235240000	235300000	2254	0.515625	HCMV_95
chr1	234680000	234690000	chr1	235260000	235270000	27	1.00993401899881e-20	6.00739087888079e-18	234600000	234920000	235240000	235300000	2254	0.515625	HCMV_96
chr1	234830000	234840000	chr1	235240000	235250000	30	1.98116046835358e-17	8.03901866983119e-15	234600000	234920000	235240000	235300000	2254	0.515625	HCMV_97
chr1	234620000	234630000	chr1	235280000	235290000	19	7.91145680259815e-13	1.69416652242052e-10	234600000	234920000	235240000	235300000	2254	0.515625	HCMV_98
chr1	234710000	234720000	chr1	235260000	235270000	17	3.01530623333181e-10	4.20682103322594e-08	234600000	234920000	235240000	235300000	2254	0.515625	HCMV_99
chr1	234790000	234800000	chr1	235240000	235250000	17	3.40431378486304e-09	3.888349528658e-07	234600000	234920000	235240000	235300000	2254	0.515625	HCMV_100
chr1	234650000	234660000	chr1	235280000	235290000	12	4.0898547343768e-06	0.000228967	234600000	234920000	235240000	235300000	2254	0.515625	HCMV_101
chr1	234790000	234800000	chr1	235270000	235280000	12	3.90515777031299e-05	0.00163226	234600000	234920000	235240000	235300000	2254	0.515625	HCMV_102
chr1	234600000	234610000	chr1	235250000	235260000	9	0.000100552	0.0036637	234600000	234920000	235240000	235300000	2254	0.515625	HCMV_103
chr1	26930000	26940000	chr1	27110000	27120000	102	1.8682150058016e-75	4.0854159307618e-71	26820000	26960000	26980000	27230000	3781	0.302857	HCMV_104
chr1	26940000	26950000	chr1	27020000	27030000	175	2.80130043799162e-73	5.42718002452383e-69	26820000	26960000	26980000	27230000	3781	0.302857	HCMV_105
chr1	26930000	26940000	chr1	27170000	27180000	61	5.64912822466547e-35	1.1959643282447e-31	26820000	26960000	26980000	27230000	3781	0.302857	HCMV_106
chr1	26940000	26950000	chr1	27070000	27080000	59	5.50556928285577e-21	3.36955141489001e-18	26820000	26960000	26980000	27230000	3781	0.302857	HCMV_107
chr1	26900000	26910000	chr1	27170000	27180000	41	8.67079262957959e-17	3.24423740389599e-14	26820000	26960000	26980000	27230000	3781	0.302857	HCMV_108
chr1	26900000	26910000	chr1	27120000	27130000	33	6.62092881714312e-13	1.43455120629636e-10	26820000	26960000	26980000	27230000	3781	0.302857	HCMV_109
chr1	26940000	26950000	chr1	26980000	26990000	75	2.58525879135987e-11	4.35358065842725e-09	26820000	26960000	26980000	27230000	3781	0.302857	HCMV_110
chr1	26860000	26870000	chr1	27170000	27180000	21	4.42427007441112e-10	5.99026894677037e-08	26820000	26960000	26980000	27230000	3781	0.302857	HCMV_111
chr1	26920000	26930000	chr1	27200000	27210000	18	3.04275148683166e-09	3.50807522441579e-07	26820000	26960000	26980000	27230000	3781	0.302857	HCMV_112
chr1	26820000	26830000	chr1	27170000	27180000	21	8.5451930470151e-09	8.9985999379415e-07	26820000	26960000	26980000	27230000	3781	0.302857	HCMV_113
chr1	26930000	26940000	chr1	27140000	27150000	24	1.3654937086877e-07	1.1076077603166e-05	26820000	26960000	26980000	27230000	3781	0.302857	HCMV_114
chr1	26900000	26910000	chr1	27090000	27100000	27	4.13239191512106e-05	0.00171287	26820000	26960000	26980000	27230000	3781	0.302857	HCMV_115
chr1	26820000	26830000	chr1	27200000	27210000	11	0.000106816	0.00385796	26820000	26960000	26980000	27230000	3781	0.302857	HCMV_116
chr1	9340000	9350000	chr1	9550000	9560000	69	1.08909328996974e-56	9.10142801406087e-53	9290000	9450000	9410000	9570000	2587	0.40625	HCMV_117
chr1	9340000	9350000	chr1	9510000	9520000	59	1.25187891120475e-39	3.81143014312995e-36	9290000	9450000	9410000	9570000	2587	0.40625	HCMV_118
chr1	9370000	9380000	chr1	9540000	9550000	29	1.51019066037024e-13	3.60620811054046e-11	9290000	9450000	9410000	9570000	2587	0.40625	HCMV_119
chr1	9390000	9400000	chr1	9510000	9520000	35	7.30235300472969e-13	1.57198230285594e-10	9290000	9450000	9410000	9570000	2587	0.40625	HCMV_120
chr1	9430000	9440000	chr1	9510000	9520000	34	3.213844154235e-11	5.32403133756222e-09	9290000	9450000	9410000	9570000	2587	0.40625	HCMV_121
chr1	9410000	9420000	chr1	9540000	9550000	23	8.48157591228725e-09	8.93830853652896e-07	9290000	9450000	9410000	9570000	2587	0.40625	HCMV_122
chr1	9350000	9360000	chr1	9480000	9490000	25	1.64979279672836e-08	1.63686580421303e-06	9290000	9450000	9410000	9570000	2587	0.40625	HCMV_123
chr1	9310000	9320000	chr1	9540000	9550000	18	1.77519648909266e-08	1.74890939614776e-06	9290000	9450000	9410000	9570000	2587	0.40625	HCMV_124
chr1	9350000	9360000	chr1	9420000	9430000	31	2.83369363277513e-07	2.13316835154977e-05	9290000	9450000	9410000	9570000	2587	0.40625	HCMV_125
chr1	9310000	9320000	chr1	9510000	9520000	16	5.12998104015873e-06	0.000279611	9290000	9450000	9410000	9570000	2587	0.40625	HCMV_126
chr1	9340000	9350000	chr1	9450000	9460000	32	2.78907766880079e-05	0.00122204	9290000	9450000	9410000	9570000	2587	0.40625	HCMV_127
chr1	9380000	9390000	chr1	9480000	9490000	20	0.000170142	0.00572621	9290000	9450000	9410000	9570000	2587	0.40625	HCMV_128
chr1	16120000	16130000	chr1	16330000	16340000	109	6.85460982592679e-65	8.6768644870994e-61	16090000	16200000	16190000	16400000	4979	0.419913	HCMV_129
chr1	16120000	16130000	chr1	16270000	16280000	153	4.29182389601474e-64	5.2245216344887e-60	16090000	16200000	16190000	16400000	4979	0.419913	HCMV_130
chr1	16120000	16130000	chr1	16300000	16310000	81	1.05775677770288e-36	2.55820157890266e-33	16090000	16200000	16190000	16400000	4979	0.419913	HCMV_131
chr1	16120000	16130000	chr1	16240000	16250000	88	1.64459425871131e-26	1.73408136406788e-23	16090000	16200000	16190000	16400000	4979	0.419913	HCMV_132
chr1	16170000	16180000	chr1	16330000	16340000	57	1.48553415567493e-20	8.67878712145969e-18	16090000	16200000	16190000	16400000	4979	0.419913	HCMV_133
chr1	16120000	16130000	chr1	16210000	16220000	103	6.03944109474696e-18	2.61448450224407e-15	16090000	16200000	16190000	16400000	4979	0.419913	HCMV_134
chr1	16170000	16180000	chr1	16220000	16230000	106	6.77100874871782e-16	2.25450823659362e-13	16090000	16200000	16190000	16400000	4979	0.419913	HCMV_135
chr1	16170000	16180000	chr1	16270000	16280000	83	1.54466473045731e-15	4.8988730042346e-13	16090000	16200000	16190000	16400000	4979	0.419913	HCMV_136
chr1	16120000	16130000	chr1	16380000	16390000	29	8.7760016168292e-14	2.16705081906717e-11	16090000	16200000	16190000	16400000	4979	0.419913	HCMV_137
chr1	16090000	16100000	chr1	16270000	16280000	36	3.43180945687284e-10	4.74297132618524e-08	16090000	16200000	16190000	16400000	4979	0.419913	HCMV_138
chr1	16160000	16170000	chr1	16300000	16310000	40	9.32983307220249e-10	1.18927617782256e-07	16090000	16200000	16190000	16400000	4979	0.419913	HCMV_139
chr1	16090000	16100000	chr1	16330000	16340000	23	1.97431047438389e-08	1.92621212233561e-06	16090000	16200000	16190000	16400000	4979	0.419913	HCMV_140
chr1	2120000	2130000	chr1	2310000	2320000	48	2.87372118554126e-34	5.76474152542054e-31	2110000	2200000	2180000	2350000	2923	0.575163	HCMV_141
chr1	2120000	2130000	chr1	2230000	2240000	41	1.11865208856574e-18	5.28632448590379e-16	2110000	2200000	2180000	2350000	2923	0.575163	HCMV_142
chr1	2160000	2170000	chr1	2310000	2320000	32	9.88165664641089e-17	3.67264450689701e-14	2110000	2200000	2180000	2350000	2923	0.575163	HCMV_143
chr1	2170000	2180000	chr1	2190000	2200000	137	2.81386173795594e-14	7.48441929984256e-12	2110000	2200000	2180000	2350000	2923	0.575163	HCMV_144
chr1	2160000	2170000	chr1	2230000	2240000	40	2.27702235228602e-13	5.2891440482331e-11	2110000	2200000	2180000	2350000	2923	0.575163	HCMV_145
chr1	2130000	2140000	chr1	2280000	2290000	27	8.53200013543766e-13	1.81735285404566e-10	2110000	2200000	2180000	2350000	2923	0.575163	HCMV_146
chr1	2190000	2200000	chr1	2230000	2240000	50	4.55307274001384e-09	5.07280339573745e-07	2110000	2200000	2180000	2350000	2923	0.575163	HCMV_147
chr1	2190000	2200000	chr1	2320000	2330000	34	1.33689301751499e-08	1.35203846176349e-06	2110000	2200000	2180000	2350000	2923	0.575163	HCMV_148
chr1	2180000	2190000	chr1	2280000	2290000	25	3.2748908663587e-07	2.42956307102272e-05	2110000	2200000	2180000	2350000	2923	0.575163	HCMV_149
chr1	2120000	2130000	chr1	2340000	2350000	17	4.62135745863478e-06	0.000255021	2110000	2200000	2180000	2350000	2923	0.575163	HCMV_150
chr1	201530000	201540000	chr1	201670000	201680000	231	3.09334101411519e-141	8.68981119735931e-136	201470000	201560000	201600000	201830000	4932	0.439614	HCMV_151
chr1	201520000	201530000	chr1	201750000	201760000	80	3.05547306550619e-47	1.53380925922102e-43	201470000	201560000	201600000	201830000	4932	0.439614	HCMV_152
chr1	201530000	201540000	chr1	201610000	201620000	159	4.31320775546105e-47	2.14600243616155e-43	201470000	201560000	201600000	201830000	4932	0.439614	HCMV_153
chr1	201500000	201510000	chr1	201670000	201680000	85	3.33719515224188e-40	1.06022617407448e-36	201470000	201560000	201600000	201830000	4932	0.439614	HCMV_154
chr1	201520000	201530000	chr1	201640000	201650000	83	5.50164374922019e-29	7.2259584264551e-26	201470000	201560000	201600000	201830000	4932	0.439614	HCMV_155
chr1	201520000	201530000	chr1	201790000	201800000	51	3.98860820934722e-26	4.04842513829891e-23	201470000	201560000	201600000	201830000	4932	0.439614	HCMV_156
chr1	201520000	201530000	chr1	201700000	201710000	57	3.85432380309097e-18	1.71082740827861e-15	201470000	201560000	201600000	201830000	4932	0.439614	HCMV_157
chr1	201520000	201530000	chr1	201820000	201830000	31	7.68964127488103e-12	1.41138134696554e-09	201470000	201560000	201600000	201830000	4932	0.439614	HCMV_158
chr1	201490000	201500000	chr1	201750000	201760000	29	8.60992079351196e-12	1.56711591482554e-09	201470000	201560000	201600000	201830000	4932	0.439614	HCMV_159
chr1	201470000	201480000	chr1	201670000	201680000	38	1.82215257395856e-08	1.7909426450213e-06	201470000	201560000	201600000	201830000	4932	0.439614	HCMV_160
chr1	201550000	201560000	chr1	201750000	201760000	21	2.36481242461097e-05	0.00106018	201470000	201560000	201600000	201830000	4932	0.439614	HCMV_161
chr1	91960000	91970000	chr1	92390000	92400000	39	3.35678083076163e-32	5.7044327435679e-29	91940000	92130000	92290000	92420000	1476	0.340081	HCMV_162
chr1	91960000	91970000	chr1	92350000	92360000	38	5.60257481142495e-27	6.17392079232246e-24	91940000	92130000	92290000	92420000	1476	0.340081	HCMV_163
chr1	92070000	92080000	chr1	92360000	92370000	34	7.32471149827299e-18	3.136672851609e-15	91940000	92130000	92290000	92420000	1476	0.340081	HCMV_164
chr1	91990000	92000000	chr1	92350000	92360000	28	2.42641355619248e-17	9.73754156511992e-15	91940000	92130000	92290000	92420000	1476	0.340081	HCMV_165
chr1	92020000	92030000	chr1	92350000	92360000	25	6.90367812542177e-15	2.00373133027913e-12	91940000	92130000	92290000	92420000	1476	0.340081	HCMV_166
chr1	92010000	92020000	chr1	92390000	92400000	22	2.47029035074746e-12	4.90787630987097e-10	91940000	92130000	92290000	92420000	1476	0.340081	HCMV_167
chr1	91960000	91970000	chr1	92320000	92330000	23	4.65418309361063e-12	8.85508131827304e-10	91940000	92130000	92290000	92420000	1476	0.340081	HCMV_168
chr1	92020000	92030000	chr1	92320000	92330000	20	3.30251129654687e-10	4.57778632506871e-08	91940000	92130000	92290000	92420000	1476	0.340081	HCMV_169
chr1	92070000	92080000	chr1	92320000	92330000	21	5.65141591998105e-08	4.99975514037672e-06	91940000	92130000	92290000	92420000	1476	0.340081	HCMV_170
chr1	92100000	92110000	chr1	92350000	92360000	16	2.3711230650142e-06	0.000141587	91940000	92130000	92290000	92420000	1476	0.340081	HCMV_171
chr1	91960000	91970000	chr1	92290000	92300000	15	3.81243241786772e-06	0.000215266	91940000	92130000	92290000	92420000	1476	0.340081	HCMV_172
chr1	92110000	92120000	chr1	92320000	92330000	17	4.80552837410809e-06	0.000263886	91940000	92130000	92290000	92420000	1476	0.340081	HCMV_173
chr1	92070000	92080000	chr1	92390000	92400000	14	6.4079999421865e-06	0.000339786	91940000	92130000	92290000	92420000	1476	0.340081	HCMV_174
chr1	92040000	92050000	chr1	92390000	92400000	12	1.09556369367653e-05	0.000543246	91940000	92130000	92290000	92420000	1476	0.340081	HCMV_175
chr1	94140000	94150000	chr1	94270000	94280000	130	1.48874393482658e-73	2.92302785563729e-69	94030000	94180000	94230000	94360000	2706	0.384615	HCMV_176
chr1	94080000	94090000	chr1	94270000	94280000	83	4.50622686648784e-47	2.23898717838259e-43	94030000	94180000	94230000	94360000	2706	0.384615	HCMV_177
chr1	94080000	94090000	chr1	94300000	94310000	75	2.10109906870154e-36	4.94721318751528e-33	94030000	94180000	94230000	94360000	2706	0.384615	HCMV_178
chr1	94140000	94150000	chr1	94300000	94310000	67	6.71136281475746e-20	3.64835097255416e-17	94030000	94180000	94230000	94360000	2706	0.384615	HCMV_179
chr1	94140000	94150000	chr1	94240000	94250000	75	2.48809301632988e-18	1.13036184410314e-15	94030000	94180000	94230000	94360000	2706	0.384615	HCMV_180
chr1	94090000	94100000	chr1	94240000	94250000	37	1.78755865455549e-12	3.62943925529249e-10	94030000	94180000	94230000	94360000	2706	0.384615	HCMV_181
chr1	94040000	94050000	chr1	94300000	94310000	31	4.81722924934281e-12	9.14053137567908e-10	94030000	94180000	94230000	94360000	2706	0.384615	HCMV_182
chr1	94040000	94050000	chr1	94270000	94280000	27	8.02998508275338e-11	1.24196071035181e-08	94030000	94180000	94230000	94360000	2706	0.384615	HCMV_183
chr1	94080000	94090000	chr1	94330000	94340000	27	1.35578375173147e-08	1.36936090000401e-06	94030000	94180000	94230000	94360000	2706	0.384615	HCMV_184
chr1	94170000	94180000	chr1	94270000	94280000	50	3.06431951727832e-06	0.000177506	94030000	94180000	94230000	94360000	2706	0.384615	HCMV_185
chr1	94110000	94120000	chr1	94270000	94280000	25	1.83156576219132e-05	0.000848876	94030000	94180000	94230000	94360000	2706	0.384615	HCMV_186
chr1	115680000	115690000	chr1	116000000	116010000	47	3.84449714512691e-39	1.12050646046453e-35	115670000	115760000	115960000	116160000	1574	0.433333	HCMV_187
chr1	115680000	115690000	chr1	116130000	116140000	36	2.11306891590915e-31	3.37200832207763e-28	115670000	115760000	115960000	116160000	1574	0.433333	HCMV_188
chr1	115680000	115690000	chr1	116080000	116090000	37	1.32247425603761e-26	1.40579879540237e-23	115670000	115760000	115960000	116160000	1574	0.433333	HCMV_189
chr1	115710000	115720000	chr1	115990000	116000000	37	5.174410484792e-22	3.52715537837247e-19	115670000	115760000	115960000	116160000	1574	0.433333	HCMV_190
chr1	115680000	115690000	chr1	115970000	115980000	32	1.84300813732888e-17	7.5088862098415e-15	115670000	115760000	115960000	116160000	1574	0.433333	HCMV_191
chr1	115680000	115690000	chr1	116030000	116040000	26	1.0287460678374e-15	3.34634226521191e-13	115670000	115760000	115960000	116160000	1574	0.433333	HCMV_192
chr1	115720000	115730000	chr1	116080000	116090000	26	1.02932445316005e-14	2.91128461945316e-12	115670000	115760000	115960000	116160000	1574	0.433333	HCMV_193
chr1	115710000	115720000	chr1	116030000	116040000	26	6.02574416576023e-14	1.52473726920808e-11	115670000	115760000	115960000	116160000	1574	0.433333	HCMV_194
chr1	115750000	115760000	chr1	116080000	116090000	22	6.68781435375737e-10	8.75524226395662e-08	115670000	115760000	115960000	116160000	1574	0.433333	HCMV_195
chr1	115710000	115720000	chr1	115960000	115970000	20	2.18188842077005e-07	1.68727730126564e-05	115670000	115760000	115960000	116160000	1574	0.433333	HCMV_196
chr1	115740000	115750000	chr1	116030000	116040000	14	0.000184884	0.00614105	115670000	115760000	115960000	116160000	1574	0.433333	HCMV_197
chr1	115740000	115750000	chr1	115970000	115980000	18	0.000201313	0.00659924	115670000	115760000	115960000	116160000	1574	0.433333	HCMV_198
chr1	172110000	172120000	chr1	172350000	172360000	50	4.36371839624774e-29	5.78653619122821e-26	171950000	172160000	172290000	172420000	1383	0.307692	HCMV_199
chr1	172110000	172120000	chr1	172320000	172330000	46	2.64743295239826e-22	1.85590106486369e-19	171950000	172160000	172290000	172420000	1383	0.307692	HCMV_200
chr1	171960000	171970000	chr1	172390000	172400000	27	3.39351969598181e-22	2.35675473907351e-19	171950000	172160000	172290000	172420000	1383	0.307692	HCMV_201
chr1	172110000	172120000	chr1	172390000	172400000	31	1.33001650164662e-18	6.23592981555643e-16	171950000	172160000	172290000	172420000	1383	0.307692	HCMV_202
chr1	172110000	172120000	chr1	172290000	172300000	41	3.21167408743312e-17	1.26922433596669e-14	171950000	172160000	172290000	172420000	1383	0.307692	HCMV_203
chr1	172050000	172060000	chr1	172360000	172370000	22	4.52208757808192e-12	8.61992245194793e-10	171950000	172160000	172290000	172420000	1383	0.307692	HCMV_204
chr1	171980000	171990000	chr1	172360000	172370000	19	1.78566097282688e-11	3.08701302310771e-09	171950000	172160000	172290000	172420000	1383	0.307692	HCMV_205
chr1	172140000	172150000	chr1	172360000	172370000	22	6.31140804045929e-11	9.93834227148485e-09	171950000	172160000	172290000	172420000	1383	0.307692	HCMV_206
chr1	171990000	172000000	chr1	172410000	172420000	18	2.4229135116686e-10	3.43913590188303e-08	171950000	172160000	172290000	172420000	1383	0.307692	HCMV_207
chr1	172010000	172020000	chr1	172360000	172370000	17	4.09250038437863e-10	5.57382099322556e-08	171950000	172160000	172290000	172420000	1383	0.307692	HCMV_208
chr1	172140000	172150000	chr1	172320000	172330000	22	2.64377691048363e-07	2.0051431709067e-05	171950000	172160000	172290000	172420000	1383	0.307692	HCMV_209
chr1	172080000	172090000	chr1	172350000	172360000	17	1.01944550526486e-06	6.6983441817932e-05	171950000	172160000	172290000	172420000	1383	0.307692	HCMV_210
chr1	172080000	172090000	chr1	172320000	172330000	16	2.28982030073873e-05	0.00103077	171950000	172160000	172290000	172420000	1383	0.307692	HCMV_211
chr1	110320000	110330000	chr1	110520000	110530000	107	2.00251498477696e-95	9.94979948474979e-91	110300000	110400000	110410000	110560000	2124	0.433333	HCMV_212
chr1	110330000	110340000	chr1	110420000	110430000	64	2.88808010488716e-24	2.47672892609219e-21	110300000	110400000	110410000	110560000	2124	0.433333	HCMV_213
chr1	110330000	110340000	chr1	110450000	110460000	43	3.46554395171662e-17	1.36497243576004e-14	110300000	110400000	110410000	110560000	2124	0.433333	HCMV_214
chr1	110360000	110370000	chr1	110520000	110530000	37	5.25229371334836e-14	1.34002803528755e-11	110300000	110400000	110410000	110560000	2124	0.433333	HCMV_215
chr1	110360000	110370000	chr1	110450000	110460000	31	1.29929259240966e-09	1.61072806710586e-07	110300000	110400000	110410000	110560000	2124	0.433333	HCMV_216
chr1	110330000	110340000	chr1	110490000	110500000	29	1.99302106285376e-08	1.94304126144108e-06	110300000	110400000	110410000	110560000	2124	0.433333	HCMV_217
chr1	110360000	110370000	chr1	110410000	110420000	46	2.29695644795508e-08	2.20924446535182e-06	110300000	110400000	110410000	110560000	2124	0.433333	HCMV_218
chr1	110310000	110320000	chr1	110550000	110560000	21	3.10817669710911e-07	2.31784159572774e-05	110300000	110400000	110410000	110560000	2124	0.433333	HCMV_219
chr1	110340000	110350000	chr1	110550000	110560000	19	0.000126534	0.00445519	110300000	110400000	110410000	110560000	2124	0.433333	HCMV_220
chr1	110390000	110400000	chr1	110520000	110530000	29	0.000153588	0.00525151	110300000	110400000	110410000	110560000	2124	0.433333	HCMV_221
chr1	19230000	19240000	chr1	19400000	19410000	71	2.88272891362811e-43	1.13139256321165e-39	19210000	19310000	19350000	19460000	2229	0.581818	HCMV_222
chr1	19220000	19230000	chr1	19370000	19380000	53	5.5357912550188e-25	5.08462844463964e-22	19210000	19310000	19350000	19460000	2229	0.581818	HCMV_223
chr1	19270000	19280000	chr1	19400000	19410000	65	7.76518401994923e-25	7.04462393946336e-22	19210000	19310000	19350000	19460000	2229	0.581818	HCMV_224
chr1	19260000	19270000	chr1	19360000	19370000	33	1.04004505537658e-08	1.07634377136364e-06	19210000	19310000	19350000	19460000	2229	0.581818	HCMV_225
chr1	19230000	19240000	chr1	19440000	19450000	29	5.13859413887075e-08	4.58662212975749e-06	19210000	19310000	19350000	19460000	2229	0.581818	HCMV_226
chr1	19270000	19280000	chr1	19440000	19450000	36	1.16642653248384e-06	7.54932056099311e-05	19210000	19310000	19350000	19460000	2229	0.581818	HCMV_227
chr1	19300000	19310000	chr1	19370000	19380000	32	0.000113278	0.00405594	19210000	19310000	19350000	19460000	2229	0.581818	HCMV_228
chr1	39570000	39580000	chr1	39650000	39660000	139	3.62065762045279e-43	1.40814623886381e-39	39540000	39600000	39620000	39940000	2915	0.359375	HCMV_229
chr1	39570000	39580000	chr1	39720000	39730000	85	2.30185537618904e-33	4.30649664844875e-30	39540000	39600000	39620000	39940000	2915	0.359375	HCMV_230
chr1	39560000	39570000	chr1	39900000	39910000	31	4.05010247162589e-17	1.58156631439012e-14	39540000	39600000	39620000	39940000	2915	0.359375	HCMV_231
chr1	39570000	39580000	chr1	39840000	39850000	39	1.57706340222384e-16	5.70432415720493e-14	39540000	39600000	39620000	39940000	2915	0.359375	HCMV_232
chr1	39570000	39580000	chr1	39680000	39690000	75	2.72088119207067e-15	8.3539001700897e-13	39540000	39600000	39620000	39940000	2915	0.359375	HCMV_233
chr1	39570000	39580000	chr1	39780000	39790000	33	5.42666473184758e-15	1.59730870644051e-12	39540000	39600000	39620000	39940000	2915	0.359375	HCMV_234
chr1	39570000	39580000	chr1	39870000	39880000	27	4.86872701909761e-13	1.07769745467386e-10	39540000	39600000	39620000	39940000	2915	0.359375	HCMV_235
chr1	39560000	39570000	chr1	39750000	39760000	33	1.95420048759365e-11	3.35645387817614e-09	39540000	39600000	39620000	39940000	2915	0.359375	HCMV_236
chr1	39570000	39580000	chr1	39810000	39820000	29	3.18559983599068e-09	3.65902278426919e-07	39540000	39600000	39620000	39940000	2915	0.359375	HCMV_237
chr1	39560000	39570000	chr1	39930000	39940000	19	7.03453699378414e-09	7.53391075074059e-07	39540000	39600000	39620000	39940000	2915	0.359375	HCMV_238
chr1	39540000	39550000	chr1	39860000	39870000	16	1.66520095555572e-05	0.00078134	39540000	39600000	39620000	39940000	2915	0.359375	HCMV_239
chr1	39570000	39580000	chr1	39620000	39630000	114	3.46971412150543e-05	0.00147516	39540000	39600000	39620000	39940000	2915	0.359375	HCMV_240
chr1	43690000	43700000	chr1	43830000	43840000	116	4.61197625187646e-60	4.57062365829756e-56	43670000	43770000	43790000	43950000	2854	0.40625	HCMV_241
chr1	43690000	43700000	chr1	43880000	43890000	72	1.7573435887775e-45	7.8793698405504e-42	43670000	43770000	43790000	43950000	2854	0.40625	HCMV_242
chr1	43690000	43700000	chr1	43910000	43920000	41	4.5427920281767e-16	1.54873881930808e-13	43670000	43770000	43790000	43950000	2854	0.40625	HCMV_243
chr1	43740000	43750000	chr1	43810000	43820000	41	2.1295957792555e-11	3.63394924300359e-09	43670000	43770000	43790000	43950000	2854	0.40625	HCMV_244
chr1	43700000	43710000	chr1	43790000	43800000	33	5.94772640581066e-10	7.86047587205078e-08	43670000	43770000	43790000	43950000	2854	0.40625	HCMV_245
chr1	43670000	43680000	chr1	43800000	43810000	40	1.12522094821488e-08	1.15631678334769e-06	43670000	43770000	43790000	43950000	2854	0.40625	HCMV_246
chr1	43690000	43700000	chr1	43940000	43950000	22	1.18180987908847e-06	7.63744686644142e-05	43670000	43770000	43790000	43950000	2854	0.40625	HCMV_247
chr1	59200000	59210000	chr1	60220000	60230000	29	4.72200886558087e-28	5.7310012544825e-25	59200000	59260000	60120000	60260000	920	0.75	HCMV_248
chr1	59200000	59210000	chr1	60160000	60170000	24	4.27533100006623e-21	2.64252069453683e-18	59200000	59260000	60120000	60260000	920	0.75	HCMV_249
chr1	59240000	59250000	chr1	60160000	60170000	24	8.90280858756886e-21	5.33344684164196e-18	59200000	59260000	60120000	60260000	920	0.75	HCMV_250
chr1	59240000	59250000	chr1	60130000	60140000	24	1.36146161125768e-20	7.98971876006268e-18	59200000	59260000	60120000	60260000	920	0.75	HCMV_251
chr1	59240000	59250000	chr1	60210000	60220000	23	1.78122089601714e-20	1.03212148864702e-17	59200000	59260000	60120000	60260000	920	0.75	HCMV_252
chr1	59200000	59210000	chr1	60190000	60200000	20	9.07433164263604e-17	3.38784158863547e-14	59200000	59260000	60120000	60260000	920	0.75	HCMV_253
chr1	59200000	59210000	chr1	60130000	60140000	15	7.87356068882905e-11	1.21952331917955e-08	59200000	59260000	60120000	60260000	920	0.75	HCMV_254
chr1	59250000	59260000	chr1	60240000	60250000	9	1.13321211254991e-05	0.000559529	59200000	59260000	60120000	60260000	920	0.75	HCMV_255
chr1	59220000	59230000	chr1	60250000	60260000	8	0.000155106	0.00529541	59200000	59260000	60120000	60260000	920	0.75	HCMV_256
chr1	53380000	53390000	chr1	53660000	53670000	58	2.74909772017579e-41	9.42684709960138e-38	53340000	53530000	53600000	53720000	1514	0.311404	HCMV_257
chr1	53390000	53400000	chr1	53630000	53640000	34	2.0873902780934e-20	1.20199680110307e-17	53340000	53530000	53600000	53720000	1514	0.311404	HCMV_258
chr1	53510000	53520000	chr1	53640000	53650000	35	6.49415330640468e-15	1.89012804261441e-12	53340000	53530000	53600000	53720000	1514	0.311404	HCMV_259
chr1	53430000	53440000	chr1	53640000	53650000	30	1.11966411034175e-13	2.72343640917781e-11	53340000	53530000	53600000	53720000	1514	0.311404	HCMV_260
chr1	53480000	53490000	chr1	53640000	53650000	25	1.33327558388776e-09	1.649832365289e-07	53340000	53530000	53600000	53720000	1514	0.311404	HCMV_261
chr1	53380000	53390000	chr1	53700000	53710000	18	9.19522619565769e-08	7.75846798643051e-06	53340000	53530000	53600000	53720000	1514	0.311404	HCMV_262
chr1	53390000	53400000	chr1	53600000	53610000	21	3.98102587944698e-07	2.89609531571982e-05	53340000	53530000	53600000	53720000	1514	0.311404	HCMV_263
chr1	53350000	53360000	chr1	53660000	53670000	16	4.891459667469e-06	0.000268066	53340000	53530000	53600000	53720000	1514	0.311404	HCMV_264
chr1	53360000	53370000	chr1	53630000	53640000	13	4.70571137771147e-05	0.00191443	53340000	53530000	53600000	53720000	1514	0.311404	HCMV_265
chr1	12460000	12470000	chr1	12670000	12680000	59	4.54722614083989e-29	6.0178595506706e-26	12290000	12620000	12630000	12700000	1976	0.290043	HCMV_266
chr1	12490000	12500000	chr1	12670000	12680000	45	6.72031547659118e-23	5.02696349937419e-20	12290000	12620000	12630000	12700000	1976	0.290043	HCMV_267
chr1	12350000	12360000	chr1	12670000	12680000	36	1.4088917341656e-20	8.25347264775695e-18	12290000	12620000	12630000	12700000	1976	0.290043	HCMV_268
chr1	12570000	12580000	chr1	12670000	12680000	64	2.94363009230278e-19	1.48799451979458e-16	12290000	12620000	12630000	12700000	1976	0.290043	HCMV_269
chr1	12530000	12540000	chr1	12670000	12680000	49	3.88166210382388e-18	1.72233410546365e-15	12290000	12620000	12630000	12700000	1976	0.290043	HCMV_270
chr1	12430000	12440000	chr1	12670000	12680000	32	2.50480540797653e-15	7.72882147176594e-13	12290000	12620000	12630000	12700000	1976	0.290043	HCMV_271
chr1	12380000	12390000	chr1	12670000	12680000	29	3.91787647645156e-13	8.79162140714957e-11	12290000	12620000	12630000	12700000	1976	0.290043	HCMV_272
chr1	12600000	12610000	chr1	12670000	12680000	62	1.25613257263194e-12	2.61171377142326e-10	12290000	12620000	12630000	12700000	1976	0.290043	HCMV_273
chr1	12310000	12320000	chr1	12670000	12680000	24	2.46718874845714e-11	4.16708544751956e-09	12290000	12620000	12630000	12700000	1976	0.290043	HCMV_274
chr1	12610000	12620000	chr1	12640000	12650000	60	1.4358058875771e-08	1.44262366450881e-06	12290000	12620000	12630000	12700000	1976	0.290043	HCMV_275
chr1	12490000	12500000	chr1	12640000	12650000	13	0.000298027	0.00917305	12290000	12620000	12630000	12700000	1976	0.290043	HCMV_276
chr1	23010000	23020000	chr1	23250000	23260000	37	1.40400590073025e-27	1.63370144502945e-24	22980000	23090000	23150000	23310000	1189	0.363636	HCMV_277
chr1	23010000	23020000	chr1	23200000	23210000	30	4.13317554304929e-16	1.41669600854275e-13	22980000	23090000	23150000	23310000	1189	0.363636	HCMV_278
chr1	23070000	23080000	chr1	23180000	23190000	36	4.0337164364436e-12	7.7523245150606e-10	22980000	23090000	23150000	23310000	1189	0.363636	HCMV_279
chr1	23030000	23040000	chr1	23150000	23160000	29	4.18125232993088e-11	6.7951681363336e-09	22980000	23090000	23150000	23310000	1189	0.363636	HCMV_280
chr1	23060000	23070000	chr1	23250000	23260000	21	2.09396650440075e-08	2.03220340994296e-06	22980000	23090000	23150000	23310000	1189	0.363636	HCMV_281
chr1	22990000	23000000	chr1	23300000	23310000	17	1.28129208238821e-07	1.04561916809525e-05	22980000	23090000	23150000	23310000	1189	0.363636	HCMV_282
chr1	22980000	22990000	chr1	23250000	23260000	14	4.54599050231008e-07	3.26215729954135e-05	22980000	23090000	23150000	23310000	1189	0.363636	HCMV_283
chr1	23000000	23010000	chr1	23150000	23160000	19	1.00103940448288e-05	0.000502081	22980000	23090000	23150000	23310000	1189	0.363636	HCMV_284
chr1	23040000	23050000	chr1	23190000	23200000	18	2.84911471266861e-05	0.00124493	22980000	23090000	23150000	23310000	1189	0.363636	HCMV_285
chr1	68020000	68030000	chr1	68150000	68160000	121	2.60536119096429e-64	3.21100288329081e-60	67980000	68060000	68130000	68260000	2513	0.596154	HCMV_286
chr1	67990000	68000000	chr1	68220000	68230000	85	1.94673846788933e-53	1.39948997410524e-49	67980000	68060000	68130000	68260000	2513	0.596154	HCMV_287
chr1	67990000	68000000	chr1	68150000	68160000	88	6.09414857851357e-45	2.63691715031278e-41	67980000	68060000	68130000	68260000	2513	0.596154	HCMV_288
chr1	68020000	68030000	chr1	68220000	68230000	77	8.24589460062677e-40	2.54984496188064e-36	67980000	68060000	68130000	68260000	2513	0.596154	HCMV_289
chr1	68020000	68030000	chr1	68190000	68200000	37	2.00611736706476e-17	8.13305769727846e-15	67980000	68060000	68130000	68260000	2513	0.596154	HCMV_290
chr1	68050000	68060000	chr1	68150000	68160000	62	3.3255312128883e-15	1.00777559063052e-12	67980000	68060000	68130000	68260000	2513	0.596154	HCMV_291
chr1	67990000	68000000	chr1	68180000	68190000	24	6.32839802714201e-09	6.84305514191914e-07	67980000	68060000	68130000	68260000	2513	0.596154	HCMV_292
chr1	68050000	68060000	chr1	68210000	68220000	32	8.355026598664e-09	8.81715755652436e-07	67980000	68060000	68130000	68260000	2513	0.596154	HCMV_293
chr1	68000000	68010000	chr1	68250000	68260000	24	8.87282027859086e-08	7.51247339518516e-06	67980000	68060000	68130000	68260000	2513	0.596154	HCMV_294
chr1	234630000	234640000	chr1	235180000	235190000	44	1.65464304170901e-39	4.98571662372655e-36	234610000	234690000	234970000	235190000	1037	0.409091	HCMV_295
chr1	234630000	234640000	chr1	235110000	235120000	42	5.36813715095708e-33	9.75334168242391e-30	234610000	234690000	234970000	235190000	1037	0.409091	HCMV_296
chr1	234630000	234640000	chr1	234990000	235000000	26	7.94317045584353e-15	2.28428481256413e-12	234610000	234690000	234970000	235190000	1037	0.409091	HCMV_297
chr1	234630000	234640000	chr1	235150000	235160000	22	2.67203041669511e-13	6.1420270832563e-11	234610000	234690000	234970000	235190000	1037	0.409091	HCMV_298
chr1	234630000	234640000	chr1	235070000	235080000	20	1.96015378803167e-11	3.36588751267726e-09	234610000	234690000	234970000	235190000	1037	0.409091	HCMV_299
chr1	234680000	234690000	chr1	235110000	235120000	21	5.48390563517346e-11	8.73244900127429e-09	234610000	234690000	234970000	235190000	1037	0.409091	HCMV_300
chr1	234630000	234640000	chr1	235030000	235040000	16	9.53363294794325e-08	8.01344994463154e-06	234610000	234690000	234970000	235190000	1037	0.409091	HCMV_301
chr1	231490000	231500000	chr1	231730000	231740000	54	1.88311146511183e-41	6.52471144498894e-38	231440000	231560000	231650000	231770000	1842	0.444444	HCMV_302
chr1	231550000	231560000	chr1	231660000	231670000	93	6.88053098931537e-35	1.44659856483645e-31	231440000	231560000	231650000	231770000	1842	0.444444	HCMV_303
chr1	231490000	231500000	chr1	231660000	231670000	64	4.64031264345705e-33	8.48159735790129e-30	231440000	231560000	231650000	231770000	1842	0.444444	HCMV_304
chr1	231520000	231530000	chr1	231720000	231730000	39	5.81485858261714e-16	1.95384438686128e-13	231440000	231560000	231650000	231770000	1842	0.444444	HCMV_305
chr1	231490000	231500000	chr1	231700000	231710000	33	4.97658831459895e-15	1.47160295423437e-12	231440000	231560000	231650000	231770000	1842	0.444444	HCMV_306
chr1	231550000	231560000	chr1	231730000	231740000	32	1.01115016623394e-12	2.13141642131575e-10	231440000	231560000	231650000	231770000	1842	0.444444	HCMV_307
chr1	231550000	231560000	chr1	231700000	231710000	39	1.19094950770806e-11	2.11943802603189e-09	231440000	231560000	231650000	231770000	1842	0.444444	HCMV_308
chr1	231520000	231530000	chr1	231660000	231670000	41	1.76202274827141e-10	2.56225007316816e-08	231440000	231560000	231650000	231770000	1842	0.444444	HCMV_309
chr1	231460000	231470000	chr1	231730000	231740000	18	7.73506104113565e-08	6.6381054376681e-06	231440000	231560000	231650000	231770000	1842	0.444444	HCMV_310
chr1	231520000	231530000	chr1	231690000	231700000	21	2.328549833412e-07	1.78807080765559e-05	231440000	231560000	231650000	231770000	1842	0.444444	HCMV_311
chr1	231460000	231470000	chr1	231660000	231670000	25	5.27917642149471e-07	3.7268078144004e-05	231440000	231560000	231650000	231770000	1842	0.444444	HCMV_312
chr1	231470000	231480000	chr1	231760000	231770000	17	2.46077072654092e-06	0.000146313	231440000	231560000	231650000	231770000	1842	0.444444	HCMV_313
chr1	203830000	203840000	chr1	204090000	204100000	127	4.45123843234574e-131	8.78688662386536e-126	203800000	203900000	204010000	204160000	1928	0.4	HCMV_314
chr1	203830000	203840000	chr1	204040000	204050000	96	2.59288413991154e-72	4.78259846787391e-68	203800000	203900000	204010000	204160000	1928	0.4	HCMV_315
chr1	203830000	203840000	chr1	204120000	204130000	37	4.89267505129428e-27	5.42848205609892e-24	203800000	203900000	204010000	204160000	1928	0.4	HCMV_316
chr1	203860000	203870000	chr1	204040000	204050000	43	4.44860180188024e-18	1.95972393097621e-15	203800000	203900000	204010000	204160000	1928	0.4	HCMV_317
chr1	203860000	203870000	chr1	204070000	204080000	28	9.32661992147661e-13	1.97600705237662e-10	203800000	203900000	204010000	204160000	1928	0.4	HCMV_318
chr1	203830000	203840000	chr1	204150000	204160000	19	3.98171532815984e-10	5.43448859293317e-08	203800000	203900000	204010000	204160000	1928	0.4	HCMV_319
chr1	203800000	203810000	chr1	204100000	204110000	19	3.10703881334914e-09	3.57688654984938e-07	203800000	203900000	204010000	204160000	1928	0.4	HCMV_320
chr1	203880000	203890000	chr1	204100000	204110000	18	1.00703502672033e-07	8.42030091845992e-06	203800000	203900000	204010000	204160000	1928	0.4	HCMV_321
chr1	203830000	203840000	chr1	204010000	204020000	22	2.14424055664884e-07	1.66108323766891e-05	203800000	203900000	204010000	204160000	1928	0.4	HCMV_322
chr1	226860000	226870000	chr1	227010000	227020000	94	1.98528973054931e-47	1.01543371135674e-43	226780000	226970000	226990000	227080000	2615	0.380117	HCMV_323
chr1	226920000	226930000	chr1	227000000	227010000	121	1.36615626290177e-45	6.16705396750368e-42	226780000	226970000	226990000	227080000	2615	0.380117	HCMV_324
chr1	226810000	226820000	chr1	227010000	227020000	63	4.32769915655757e-36	9.95564087186319e-33	226780000	226970000	226990000	227080000	2615	0.380117	HCMV_325
chr1	226890000	226900000	chr1	227010000	227020000	58	1.09872904926348e-24	9.80934712142573e-22	226780000	226970000	226990000	227080000	2615	0.380117	HCMV_326
chr1	226950000	226960000	chr1	227000000	227010000	102	1.18354777829155e-22	8.61266904625255e-20	226780000	226970000	226990000	227080000	2615	0.380117	HCMV_327
chr1	226850000	226860000	chr1	227050000	227060000	42	4.20481575168853e-18	1.85692178822428e-15	226780000	226970000	226990000	227080000	2615	0.380117	HCMV_328
chr1	226820000	226830000	chr1	227050000	227060000	29	1.74896426743558e-12	3.55631725898651e-10	226780000	226970000	226990000	227080000	2615	0.380117	HCMV_329
chr1	226780000	226790000	chr1	227010000	227020000	18	2.49329736640829e-07	1.90118069402551e-05	226780000	226970000	226990000	227080000	2615	0.380117	HCMV_330
chr1	19690000	19700000	chr1	19920000	19930000	58	1.23213969146143e-27	1.44106441488864e-24	19620000	19840000	19870000	19950000	1895	0.323864	HCMV_331
chr1	19810000	19820000	chr1	19920000	19930000	90	1.41443699577422e-26	1.49897443895839e-23	19620000	19840000	19870000	19950000	1895	0.323864	HCMV_332
chr1	19720000	19730000	chr1	19920000	19930000	56	2.21332502005642e-20	1.27140734988914e-17	19620000	19840000	19870000	19950000	1895	0.323864	HCMV_333
chr1	19650000	19660000	chr1	19920000	19930000	35	8.20831241313102e-19	3.94037731080454e-16	19620000	19840000	19870000	19950000	1895	0.323864	HCMV_334
chr1	19810000	19820000	chr1	19890000	19900000	60	1.56694820055535e-16	5.67082606634815e-14	19620000	19840000	19870000	19950000	1895	0.323864	HCMV_335
chr1	19760000	19770000	chr1	19920000	19930000	46	1.06775350699817e-13	2.60515234477789e-11	19620000	19840000	19870000	19950000	1895	0.323864	HCMV_336
chr1	19760000	19770000	chr1	19890000	19900000	27	3.74877258124228e-07	2.74350489309252e-05	19620000	19840000	19870000	19950000	1895	0.323864	HCMV_337
chr1	19620000	19630000	chr1	19920000	19930000	18	1.76114252036233e-06	0.000108885	19620000	19840000	19870000	19950000	1895	0.323864	HCMV_338
chr1	19710000	19720000	chr1	19890000	19900000	19	1.32170175825435e-05	0.00063945	19620000	19840000	19870000	19950000	1895	0.323864	HCMV_339
chr1	200590000	200600000	chr1	200770000	200780000	47	1.15280967345859e-22	8.40489850723531e-20	200570000	200650000	200700000	200830000	1599	0.528846	HCMV_340
chr1	200630000	200640000	chr1	200770000	200780000	56	8.17607751030108e-21	4.91896567483515e-18	200570000	200650000	200700000	200830000	1599	0.528846	HCMV_341
chr1	200590000	200600000	chr1	200700000	200710000	44	2.15114824886074e-17	8.69160281878766e-15	200570000	200650000	200700000	200830000	1599	0.528846	HCMV_342
chr1	200630000	200640000	chr1	200700000	200710000	54	3.20656426716273e-13	7.28724679333106e-11	200570000	200650000	200700000	200830000	1599	0.528846	HCMV_343
chr1	200630000	200640000	chr1	200740000	200750000	46	3.79733592494999e-09	4.29813420544079e-07	200570000	200650000	200700000	200830000	1599	0.528846	HCMV_344
chr1	200590000	200600000	chr1	200740000	200750000	33	4.92183621460531e-09	5.4466884018284e-07	200570000	200650000	200700000	200830000	1599	0.528846	HCMV_345
chr1	200590000	200600000	chr1	200810000	200820000	20	8.17136205130229e-08	6.97711721525628e-06	200570000	200650000	200700000	200830000	1599	0.528846	HCMV_346
chr1	21580000	21590000	chr1	21690000	21700000	63	5.52012080383898e-28	6.65321942266237e-25	21530000	21650000	21620000	21710000	3525	0.5	HCMV_347
chr1	21580000	21590000	chr1	21660000	21670000	77	3.90956090319176e-26	3.97039936775842e-23	21530000	21650000	21620000	21710000	3525	0.5	HCMV_348
chr1	21550000	21560000	chr1	21690000	21700000	46	1.24657962654728e-17	5.18680378988945e-15	21530000	21650000	21620000	21710000	3525	0.5	HCMV_349
chr1	21620000	21630000	chr1	21640000	21650000	188	4.40366644744915e-15	1.31217438934073e-12	21530000	21650000	21620000	21710000	3525	0.5	HCMV_350
chr1	21580000	21590000	chr1	21630000	21640000	84	3.03012181307778e-10	4.22603804711312e-08	21530000	21650000	21620000	21710000	3525	0.5	HCMV_351
chr1	21620000	21630000	chr1	21690000	21700000	43	5.27460317649505e-10	7.0396647084858e-08	21530000	21650000	21620000	21710000	3525	0.5	HCMV_352
chr1	21550000	21560000	chr1	21660000	21670000	34	7.3794330109207e-06	0.000384206	21530000	21650000	21620000	21710000	3525	0.5	HCMV_353
chr1	203470000	203480000	chr1	203660000	203670000	100	6.17535545623383e-67	8.84397840650676e-63	203440000	203510000	203550000	203740000	2792	0.398496	HCMV_354
chr1	203480000	203490000	chr1	203590000	203600000	131	1.17087562866748e-48	6.42522883545132e-45	203440000	203510000	203550000	203740000	2792	0.398496	HCMV_355
chr1	203470000	203480000	chr1	203630000	203640000	72	1.0909534585265e-30	1.64564944297686e-27	203440000	203510000	203550000	203740000	2792	0.398496	HCMV_356
chr1	203480000	203490000	chr1	203560000	203570000	89	1.33570013173992e-20	7.84799632758229e-18	203440000	203510000	203550000	203740000	2792	0.398496	HCMV_357
chr1	203480000	203490000	chr1	203690000	203700000	45	5.03889494065407e-19	2.48136970450055e-16	203440000	203510000	203550000	203740000	2792	0.398496	HCMV_358
chr1	203500000	203510000	chr1	203630000	203640000	46	2.32084336157729e-11	3.9371152255963e-09	203440000	203510000	203550000	203740000	2792	0.398496	HCMV_359
chr1	203480000	203490000	chr1	203730000	203740000	23	1.30029747894221e-05	0.000630499	203440000	203510000	203550000	203740000	2792	0.398496	HCMV_360
chr1	203500000	203510000	chr1	203660000	203670000	25	4.26769857302132e-05	0.0017606	203440000	203510000	203550000	203740000	2792	0.398496	HCMV_361
chr1	203440000	203450000	chr1	203660000	203670000	17	0.000271785	0.00849018	203440000	203510000	203550000	203740000	2792	0.398496	HCMV_362
chr1	16400000	16410000	chr1	16500000	16510000	195	6.70524794162604e-94	3.09965703388009e-89	16390000	16500000	16460000	16590000	5188	0.363636	HCMV_363
chr1	16400000	16410000	chr1	16470000	16480000	213	3.53584752161194e-66	4.82720380530035e-62	16390000	16500000	16460000	16590000	5188	0.363636	HCMV_364
chr1	16470000	16480000	chr1	16500000	16510000	422	2.67286784706181e-47	1.3576083157007e-43	16390000	16500000	16460000	16590000	5188	0.363636	HCMV_365
chr1	16430000	16440000	chr1	16470000	16480000	164	5.78522907260662e-31	8.91452294462759e-28	16390000	16500000	16460000	16590000	5188	0.363636	HCMV_366
chr1	16400000	16410000	chr1	16530000	16540000	74	1.55002918245434e-29	2.1312661984664e-26	16390000	16500000	16460000	16590000	5188	0.363636	HCMV_367
chr1	16400000	16410000	chr1	16560000	16570000	54	7.69397908953325e-24	6.31063361748069e-21	16390000	16500000	16460000	16590000	5188	0.363636	HCMV_368
chr1	16430000	16440000	chr1	16500000	16510000	85	1.22762686684502e-18	5.77700275113263e-16	16390000	16500000	16460000	16590000	5188	0.363636	HCMV_369
chr1	25010000	25020000	chr1	25160000	25170000	84	1.69506269478734e-50	1.02999991078085e-46	24960000	25080000	25110000	25200000	2179	0.481481	HCMV_370
chr1	25070000	25080000	chr1	25170000	25180000	68	6.87116729906751e-17	2.61061394697621e-14	24960000	25080000	25110000	25200000	2179	0.481481	HCMV_371
chr1	25010000	25020000	chr1	25130000	25140000	55	8.28780582362603e-11	1.2783176529055e-08	24960000	25080000	25110000	25200000	2179	0.481481	HCMV_372
chr1	25070000	25080000	chr1	25140000	25150000	70	2.33296754320296e-10	3.32088706753247e-08	24960000	25080000	25110000	25200000	2179	0.481481	HCMV_373
chr1	25040000	25050000	chr1	25170000	25180000	36	1.62823288089419e-09	1.97934181831049e-07	24960000	25080000	25110000	25200000	2179	0.481481	HCMV_374
chr1	25040000	25050000	chr1	25140000	25150000	40	3.34500869385168e-08	3.10993752662675e-06	24960000	25080000	25110000	25200000	2179	0.481481	HCMV_375
chr1	24970000	24980000	chr1	25160000	25170000	21	5.37822778329382e-07	3.79032157263744e-05	24960000	25080000	25110000	25200000	2179	0.481481	HCMV_376
chr1	25000000	25010000	chr1	25190000	25200000	17	0.00018993	0.00628257	24960000	25080000	25110000	25200000	2179	0.481481	HCMV_377
chr1	212650000	212660000	chr1	212780000	212790000	101	3.62063683308329e-56	2.96466754894844e-52	212620000	212710000	212720000	212860000	2056	0.388889	HCMV_378
chr1	212650000	212660000	chr1	212730000	212740000	138	3.19893624971433e-43	1.25280257668316e-39	212620000	212710000	212720000	212860000	2056	0.388889	HCMV_379
chr1	212650000	212660000	chr1	212840000	212850000	47	1.70656224886165e-22	1.22118063364172e-19	212620000	212710000	212720000	212860000	2056	0.388889	HCMV_380
chr1	212640000	212650000	chr1	212810000	212820000	29	1.33322842743388e-13	3.2117784588034e-11	212620000	212710000	212720000	212860000	2056	0.388889	HCMV_381
chr1	212680000	212690000	chr1	212730000	212740000	81	1.21860490456142e-12	2.5392531944866e-10	212620000	212710000	212720000	212860000	2056	0.388889	HCMV_382
chr1	212680000	212690000	chr1	212770000	212780000	33	1.81773662913612e-10	2.63696656963666e-08	212620000	212710000	212720000	212860000	2056	0.388889	HCMV_383
chr1	212620000	212630000	chr1	212780000	212790000	25	1.92495750358318e-05	0.00088644	212620000	212710000	212720000	212860000	2056	0.388889	HCMV_384
chr1	27720000	27730000	chr1	27920000	27930000	46	7.2588215132458e-24	5.96913275268895e-21	27710000	27770000	27830000	27950000	1536	0.666667	HCMV_385
chr1	27720000	27730000	chr1	27880000	27890000	47	7.99675796200678e-19	3.84278724612796e-16	27710000	27770000	27830000	27950000	1536	0.666667	HCMV_386
chr1	27750000	27760000	chr1	27920000	27930000	48	5.94647046642503e-18	2.57713954050853e-15	27710000	27770000	27830000	27950000	1536	0.666667	HCMV_387
chr1	27720000	27730000	chr1	27850000	27860000	30	7.23450378039374e-12	1.33357449922232e-09	27710000	27770000	27830000	27950000	1536	0.666667	HCMV_388
chr1	27750000	27760000	chr1	27840000	27850000	43	1.79906797028199e-09	2.16871567070265e-07	27710000	27770000	27830000	27950000	1536	0.666667	HCMV_389
chr1	27750000	27760000	chr1	27870000	27880000	37	1.22990677209347e-08	1.25345531569835e-06	27710000	27770000	27830000	27950000	1536	0.666667	HCMV_390
chr1	32280000	32290000	chr1	32420000	32430000	102	1.11788841529313e-61	1.19196573991984e-57	32220000	32350000	32380000	32460000	2068	0.461538	HCMV_391
chr1	32250000	32260000	chr1	32420000	32430000	44	2.27498909115216e-21	1.44766804083202e-18	32220000	32350000	32380000	32460000	2068	0.461538	HCMV_392
chr1	32260000	32270000	chr1	32450000	32460000	36	2.17330849569075e-16	7.71127862095148e-14	32220000	32350000	32380000	32460000	2068	0.461538	HCMV_393
chr1	32220000	32230000	chr1	32420000	32430000	38	1.62001342202275e-14	4.45918416934373e-12	32220000	32350000	32380000	32460000	2068	0.461538	HCMV_394
chr1	32280000	32290000	chr1	32390000	32400000	47	4.74811947147759e-10	6.39331083140544e-08	32220000	32350000	32380000	32460000	2068	0.461538	HCMV_395
chr1	32310000	32320000	chr1	32420000	32430000	45	5.12097794881475e-09	5.64858012564012e-07	32220000	32350000	32380000	32460000	2068	0.461538	HCMV_396
chr1	32340000	32350000	chr1	32400000	32410000	54	2.16852293243662e-06	0.000130844	32220000	32350000	32380000	32460000	2068	0.461538	HCMV_397
chr1	208310000	208320000	chr1	208390000	208400000	67	6.01707938728943e-20	3.28929379868665e-17	208150000	208340000	208380000	208420000	1615	0.618421	HCMV_398
chr1	208180000	208190000	chr1	208390000	208400000	42	3.71122142478629e-18	1.65051799101761e-15	208150000	208340000	208380000	208420000	1615	0.618421	HCMV_399
chr1	208210000	208220000	chr1	208410000	208420000	27	2.50682140618969e-10	3.5492272374926e-08	208150000	208340000	208380000	208420000	1615	0.618421	HCMV_400
chr1	208260000	208270000	chr1	208390000	208400000	32	7.41016569672337e-10	9.61831895919396e-08	208150000	208340000	208380000	208420000	1615	0.618421	HCMV_401
chr1	208150000	208160000	chr1	208390000	208400000	19	0.000142943	0.00493998	208150000	208340000	208380000	208420000	1615	0.618421	HCMV_402
chr1	20840000	20850000	chr1	20960000	20970000	70	3.23573014851313e-44	1.33976800877935e-40	20820000	20940000	20900000	20990000	2122	0.425926	HCMV_403
chr1	20900000	20910000	chr1	20960000	20970000	61	6.0748345806723e-25	5.55528904980529e-22	20820000	20940000	20900000	20990000	2122	0.425926	HCMV_404
chr1	20910000	20920000	chr1	20930000	20940000	165	2.00834522765778e-23	1.58222321300882e-20	20820000	20940000	20900000	20990000	2122	0.425926	HCMV_405
chr1	20840000	20850000	chr1	20930000	20940000	51	2.38549065042949e-15	7.38437300296828e-13	20820000	20940000	20900000	20990000	2122	0.425926	HCMV_406
chr1	20870000	20880000	chr1	20960000	20970000	35	3.61921391323709e-13	8.1668443050985e-11	20820000	20940000	20900000	20990000	2122	0.425926	HCMV_407
chr1	20840000	20850000	chr1	20900000	20910000	31	2.24351681786741e-07	1.7297158251253e-05	20820000	20940000	20900000	20990000	2122	0.425926	HCMV_408
chr1	45470000	45480000	chr1	45760000	45770000	111	2.09902659906703e-111	1.96552796915442e-106	45430000	45530000	45660000	45840000	1165	0.261111	HCMV_409
chr1	45470000	45480000	chr1	45800000	45810000	43	3.07167430928865e-29	4.12488642723863e-26	45430000	45530000	45660000	45840000	1165	0.261111	HCMV_410
chr1	45480000	45490000	chr1	45670000	45680000	28	1.85472871541495e-14	5.06232677490139e-12	45430000	45530000	45660000	45840000	1165	0.261111	HCMV_411
chr1	45470000	45480000	chr1	45730000	45740000	26	2.9392487129288e-14	7.79861652892962e-12	45430000	45530000	45660000	45840000	1165	0.261111	HCMV_412
chr1	45500000	45510000	chr1	45760000	45770000	19	1.39505560047072e-08	1.40531427899469e-06	45430000	45530000	45660000	45840000	1165	0.261111	HCMV_413
chr1	45520000	45530000	chr1	45730000	45740000	16	8.66489095200062e-07	5.79875874952854e-05	45430000	45530000	45660000	45840000	1165	0.261111	HCMV_414
chr1	45470000	45480000	chr1	45700000	45710000	17	2.71027556737509e-05	0.00119241	45430000	45530000	45660000	45840000	1165	0.261111	HCMV_415
chr1	45430000	45440000	chr1	45760000	45770000	13	3.97094605731276e-05	0.00165561	45430000	45530000	45660000	45840000	1165	0.261111	HCMV_416
chr1	45470000	45480000	chr1	45830000	45840000	13	0.000141685	0.00490355	45430000	45530000	45660000	45840000	1165	0.261111	HCMV_417
chr1	112020000	112030000	chr1	112290000	112300000	85	1.62470592446047e-67	2.38766978800271e-63	111980000	112090000	112130000	112310000	1654	0.247475	HCMV_418
chr1	112050000	112060000	chr1	112290000	112300000	60	3.67969666610242e-38	9.9578372412321e-35	111980000	112090000	112130000	112310000	1654	0.247475	HCMV_419
chr1	112050000	112060000	chr1	112200000	112210000	79	3.98485661665386e-38	1.07716750443365e-34	111980000	112090000	112130000	112310000	1654	0.247475	HCMV_420
chr1	112050000	112060000	chr1	112250000	112260000	55	5.90363839552364e-27	6.49197391486845e-24	111980000	112090000	112130000	112310000	1654	0.247475	HCMV_421
chr1	112050000	112060000	chr1	112160000	112170000	63	4.86848489766871e-24	4.07974007306226e-21	111980000	112090000	112130000	112310000	1654	0.247475	HCMV_422
chr1	112080000	112090000	chr1	112160000	112170000	64	5.75983285562252e-20	3.15433357360522e-17	111980000	112090000	112130000	112310000	1654	0.247475	HCMV_423
chr1	112050000	112060000	chr1	112130000	112140000	49	1.16911126592434e-10	1.75647286211819e-08	111980000	112090000	112130000	112310000	1654	0.247475	HCMV_424
chr1	111990000	112000000	chr1	112290000	112300000	20	5.63949173915816e-10	7.48698291851255e-08	111980000	112090000	112130000	112310000	1654	0.247475	HCMV_425
chr1	112080000	112090000	chr1	112200000	112210000	32	2.19695617644584e-05	0.00099436	111980000	112090000	112130000	112310000	1654	0.247475	HCMV_426
chr1	144930000	144940000	chr1	145060000	145070000	102	1.57442098931426e-29	2.16317565903503e-26	144880000	144950000	144990000	145120000	2598	0.505495	HCMV_427
chr1	144930000	144940000	chr1	145030000	145040000	87	5.23851541743618e-12	9.88418678653826e-10	144880000	144950000	144990000	145120000	2598	0.505495	HCMV_428
chr1	144900000	144910000	chr1	145060000	145070000	43	4.67388896692737e-11	7.5341787729731e-09	144880000	144950000	144990000	145120000	2598	0.505495	HCMV_429
chr1	144930000	144940000	chr1	145000000	145010000	113	1.15758910377736e-09	1.44964952535548e-07	144880000	144950000	144990000	145120000	2598	0.505495	HCMV_430
chr1	144910000	144920000	chr1	145110000	145120000	50	5.29908921335109e-09	5.8250727061888e-07	144880000	144950000	144990000	145120000	2598	0.505495	HCMV_431
chr1	144940000	144950000	chr1	145090000	145100000	36	2.26494088069651e-06	0.00013595	144880000	144950000	144990000	145120000	2598	0.505495	HCMV_432
chr1	161170000	161180000	chr1	161350000	161360000	66	5.41564814339156e-34	1.06217642202428e-30	161120000	161220000	161260000	161370000	1935	0.409091	HCMV_433
chr1	161170000	161180000	chr1	161280000	161290000	111	5.1040020215169e-31	7.88811092615185e-28	161120000	161220000	161260000	161370000	1935	0.409091	HCMV_434
chr1	161140000	161150000	chr1	161350000	161360000	37	1.55093304666756e-18	7.22257574365598e-16	161120000	161220000	161260000	161370000	1935	0.409091	HCMV_435
chr1	161200000	161210000	chr1	161350000	161360000	40	5.40546925583854e-14	1.37655954102597e-11	161120000	161220000	161260000	161370000	1935	0.409091	HCMV_436
chr1	161200000	161210000	chr1	161280000	161290000	71	4.70936263250908e-09	5.23105444454573e-07	161120000	161220000	161260000	161370000	1935	0.409091	HCMV_437
chr1	161170000	161180000	chr1	161320000	161330000	35	2.45628904493474e-05	0.00109554	161120000	161220000	161260000	161370000	1935	0.409091	HCMV_438
chr1	161140000	161150000	chr1	161280000	161290000	33	4.77501081201997e-05	0.00193892	161120000	161220000	161260000	161370000	1935	0.409091	HCMV_439
chr1	95320000	95330000	chr1	95500000	95510000	118	3.36313192655667e-89	1.27274817693015e-84	95270000	95410000	95420000	95540000	1642	0.27381	HCMV_440
chr1	95370000	95380000	chr1	95500000	95510000	68	7.93903907191362e-20	4.27973211159888e-17	95270000	95410000	95420000	95540000	1642	0.27381	HCMV_441
chr1	95400000	95410000	chr1	95500000	95510000	48	2.01019905932262e-17	8.14915307374676e-15	95270000	95410000	95420000	95540000	1642	0.27381	HCMV_442
chr1	95280000	95290000	chr1	95500000	95510000	25	4.11408030622123e-13	9.20221265451546e-11	95270000	95410000	95420000	95540000	1642	0.27381	HCMV_443
chr1	95320000	95330000	chr1	95440000	95450000	41	1.9530898070319e-10	2.81925580096774e-08	95270000	95410000	95420000	95540000	1642	0.27381	HCMV_444
chr1	95320000	95330000	chr1	95530000	95540000	26	2.03547811984725e-09	2.42793351267429e-07	95270000	95410000	95420000	95540000	1642	0.27381	HCMV_445
chr1	95320000	95330000	chr1	95470000	95480000	32	5.83306473778782e-06	0.000312914	95270000	95410000	95420000	95540000	1642	0.27381	HCMV_446
chr1	95390000	95400000	chr1	95470000	95480000	37	0.000267611	0.0083813	95270000	95410000	95420000	95540000	1642	0.27381	HCMV_447
chr1	156470000	156480000	chr1	156540000	156550000	148	2.73200620905012e-39	8.08523068330347e-36	156420000	156490000	156490000	156620000	2846	0.483516	HCMV_448
chr1	156470000	156480000	chr1	156570000	156580000	116	3.28215710803069e-34	6.53738925011544e-31	156420000	156490000	156490000	156620000	2846	0.483516	HCMV_449
chr1	156420000	156430000	chr1	156540000	156550000	60	6.22162308727541e-24	5.15685711034571e-21	156420000	156490000	156490000	156620000	2846	0.483516	HCMV_450
chr1	156420000	156430000	chr1	156570000	156580000	49	1.31593403785312e-19	6.92668946806576e-17	156420000	156490000	156490000	156620000	2846	0.483516	HCMV_451
chr1	156470000	156480000	chr1	156490000	156500000	307	1.08264441490399e-11	1.93864670122256e-09	156420000	156490000	156490000	156620000	2846	0.483516	HCMV_452
chr1	156470000	156480000	chr1	156600000	156610000	45	4.76161912760314e-05	0.00193418	156420000	156490000	156490000	156620000	2846	0.483516	HCMV_453
chr1	59250000	59260000	chr1	59760000	59770000	42	6.60032163702526e-35	1.39088886354467e-31	59200000	59410000	59720000	59810000	756	0.248677	HCMV_454
chr1	59280000	59290000	chr1	59760000	59770000	39	5.52288564337133e-29	7.25125002023395e-26	59200000	59410000	59720000	59810000	756	0.248677	HCMV_455
chr1	59220000	59230000	chr1	59760000	59770000	30	1.68722031734282e-21	1.08757557548371e-18	59200000	59410000	59720000	59810000	756	0.248677	HCMV_456
chr1	59360000	59370000	chr1	59760000	59770000	33	1.75008445691801e-20	1.01460296655351e-17	59200000	59410000	59720000	59810000	756	0.248677	HCMV_457
chr1	59320000	59330000	chr1	59760000	59770000	19	1.55678654506077e-09	1.90061249428836e-07	59200000	59410000	59720000	59810000	756	0.248677	HCMV_458
chr1	59400000	59410000	chr1	59760000	59770000	20	1.97119057579581e-08	1.92345085341546e-06	59200000	59410000	59720000	59810000	756	0.248677	HCMV_459
chr1	59250000	59260000	chr1	59720000	59730000	11	3.20026906435811e-05	0.001376	59200000	59410000	59720000	59810000	756	0.248677	HCMV_460
chr1	59240000	59250000	chr1	59800000	59810000	10	3.83340963192012e-05	0.00160642	59200000	59410000	59720000	59810000	756	0.248677	HCMV_461
chr1	90270000	90280000	chr1	90450000	90460000	45	1.67706724714518e-30	2.49169276925023e-27	90240000	90350000	90410000	90470000	1366	0.666667	HCMV_462
chr1	90300000	90310000	chr1	90410000	90420000	56	7.81431987380201e-23	5.80444946445848e-20	90240000	90350000	90410000	90470000	1366	0.666667	HCMV_463
chr1	90300000	90310000	chr1	90450000	90460000	43	4.83268225915087e-22	3.30377339394353e-19	90240000	90350000	90410000	90470000	1366	0.666667	HCMV_464
chr1	90240000	90250000	chr1	90460000	90470000	27	2.01354026209578e-10	2.8996496311138e-08	90240000	90350000	90410000	90470000	1366	0.666667	HCMV_465
chr1	90270000	90280000	chr1	90410000	90420000	28	4.04056534419025e-10	5.50842876429882e-08	90240000	90350000	90410000	90470000	1366	0.666667	HCMV_466
chr1	90340000	90350000	chr1	90460000	90470000	26	1.00628563648992e-07	8.41432388865378e-06	90240000	90350000	90410000	90470000	1366	0.666667	HCMV_467
chr1	112930000	112940000	chr1	113160000	113170000	101	8.0519134567119e-58	7.10271927909665e-54	112900000	113080000	113120000	113280000	1348	0.190972	HCMV_468
chr1	112930000	112940000	chr1	113240000	113250000	64	1.28271341040046e-42	4.79714980392487e-39	112900000	113080000	113120000	113280000	1348	0.190972	HCMV_469
chr1	113040000	113050000	chr1	113240000	113250000	59	9.03815630902785e-32	1.48379304455658e-28	112900000	113080000	113120000	113280000	1348	0.190972	HCMV_470
chr1	112930000	112940000	chr1	113130000	113140000	41	3.76748786587286e-16	1.29817532850547e-13	112900000	113080000	113120000	113280000	1348	0.190972	HCMV_471
chr1	112960000	112970000	chr1	113160000	113170000	43	6.89200295764209e-10	9.00286591164562e-08	112900000	113080000	113120000	113280000	1348	0.190972	HCMV_472
chr1	112930000	112940000	chr1	113210000	113220000	25	9.22840145766144e-10	1.17735349376139e-07	112900000	113080000	113120000	113280000	1348	0.190972	HCMV_473
chr1	112980000	112990000	chr1	113240000	113250000	23	6.16750376879393e-08	5.41377533313645e-06	112900000	113080000	113120000	113280000	1348	0.190972	HCMV_474
chr1	113010000	113020000	chr1	113240000	113250000	17	7.13769912864876e-06	0.000373246	112900000	113080000	113120000	113280000	1348	0.190972	HCMV_475
chr1	112930000	112940000	chr1	113270000	113280000	19	1.68968251725603e-05	0.000791302	112900000	113080000	113120000	113280000	1348	0.190972	HCMV_476
chr1	112900000	112910000	chr1	113160000	113170000	20	2.90253961311564e-05	0.00126502	112900000	113080000	113120000	113280000	1348	0.190972	HCMV_477
chr1	113070000	113080000	chr1	113240000	113250000	25	0.000226035	0.00727256	112900000	113080000	113120000	113280000	1348	0.190972	HCMV_478
chr1	101490000	101500000	chr1	101700000	101710000	46	2.59124038447344e-30	3.79282711151954e-27	101360000	101520000	101690000	101770000	946	0.375	HCMV_479
chr1	101360000	101370000	chr1	101750000	101760000	34	1.60911405143786e-22	1.154549138204e-19	101360000	101520000	101690000	101770000	946	0.375	HCMV_480
chr1	101460000	101470000	chr1	101700000	101710000	35	6.7328229742439e-22	4.53946154457616e-19	101360000	101520000	101690000	101770000	946	0.375	HCMV_481
chr1	101410000	101420000	chr1	101700000	101710000	26	1.08988496008501e-15	3.53263085909922e-13	101360000	101520000	101690000	101770000	946	0.375	HCMV_482
chr1	101380000	101390000	chr1	101700000	101710000	25	1.02278908390145e-13	2.50179758878476e-11	101360000	101520000	101690000	101770000	946	0.375	HCMV_483
chr1	101460000	101470000	chr1	101730000	101740000	13	0.000144932	0.00499834	101360000	101520000	101690000	101770000	946	0.375	HCMV_484
chr1	204220000	204230000	chr1	204330000	204340000	68	1.03086340912284e-39	3.16093274955234e-36	204120000	204280000	204310000	204350000	1230	0.65625	HCMV_485
chr1	204180000	204190000	chr1	204330000	204340000	52	1.91057956593482e-34	3.89470178120668e-31	204120000	204280000	204310000	204350000	1230	0.65625	HCMV_486
chr1	204130000	204140000	chr1	204330000	204340000	31	1.98212855692784e-12	3.99678579690672e-10	204120000	204280000	204310000	204350000	1230	0.65625	HCMV_487
chr1	204270000	204280000	chr1	204320000	204330000	52	1.29142528547629e-08	1.31022827690203e-06	204120000	204280000	204310000	204350000	1230	0.65625	HCMV_488
chr1	227940000	227950000	chr1	228130000	228140000	49	3.43634820987647e-35	7.4023394128568e-32	227910000	228010000	228070000	228150000	891	0.525	HCMV_489
chr1	227980000	227990000	chr1	228130000	228140000	39	3.09683817411597e-22	2.15913059211653e-19	227910000	228010000	228070000	228150000	891	0.525	HCMV_490
chr1	227970000	227980000	chr1	228090000	228100000	35	1.8571541019526e-20	1.07424576495014e-17	227910000	228010000	228070000	228150000	891	0.525	HCMV_491
chr1	227940000	227950000	chr1	228090000	228100000	18	3.40318073691264e-08	3.15871410582899e-06	227910000	228010000	228070000	228150000	891	0.525	HCMV_492
chr1	227910000	227920000	chr1	228130000	228140000	12	8.12543640717902e-06	0.000418297	227910000	228010000	228070000	228150000	891	0.525	HCMV_493
chr1	15920000	15930000	chr1	16030000	16040000	71	1.87356194378623e-28	2.35733726190099e-25	15900000	15950000	16000000	16100000	1422	0.8	HCMV_494
chr1	15920000	15930000	chr1	16000000	16010000	67	4.95318850686709e-16	1.6810409689466e-13	15900000	15950000	16000000	16100000	1422	0.8	HCMV_495
chr1	15920000	15930000	chr1	16080000	16090000	39	2.33862733488304e-13	5.42155217626619e-11	15900000	15950000	16000000	16100000	1422	0.8	HCMV_496
chr1	44230000	44240000	chr1	44390000	44400000	63	5.87940637417468e-28	7.07574592941986e-25	44170000	44270000	44370000	44450000	1119	0.5	HCMV_497
chr1	44170000	44180000	chr1	44410000	44420000	32	5.40903476997481e-16	1.82616004525492e-13	44170000	44270000	44370000	44450000	1119	0.5	HCMV_498
chr1	44200000	44210000	chr1	44390000	44400000	27	6.83312662516027e-09	7.33874403425932e-07	44170000	44270000	44370000	44450000	1119	0.5	HCMV_499
chr1	44240000	44250000	chr1	44430000	44440000	19	6.82862258331145e-07	4.69043112817558e-05	44170000	44270000	44370000	44450000	1119	0.5	HCMV_500
chr1	44170000	44180000	chr1	44380000	44390000	19	4.50715876981066e-06	0.000249467	44170000	44270000	44370000	44450000	1119	0.5	HCMV_501
chr1	44170000	44180000	chr1	44440000	44450000	16	7.72955466037869e-06	0.000400309	44170000	44270000	44370000	44450000	1119	0.5	HCMV_502
chr1	44260000	44270000	chr1	44390000	44400000	26	9.33201449167736e-05	0.00343782	44170000	44270000	44370000	44450000	1119	0.5	HCMV_503
chr1	164580000	164590000	chr1	164750000	164760000	105	7.14883872755223e-64	8.60206455704544e-60	164520000	164630000	164710000	164770000	1292	0.606061	HCMV_504
chr1	164530000	164540000	chr1	164750000	164760000	60	2.82376840573251e-34	5.66764849861528e-31	164520000	164630000	164710000	164770000	1292	0.606061	HCMV_505
chr1	164610000	164620000	chr1	164740000	164750000	47	6.39321442833823e-15	1.86215959247884e-12	164520000	164630000	164710000	164770000	1292	0.606061	HCMV_506
chr1	164530000	164540000	chr1	164720000	164730000	30	5.79087560103822e-10	7.67261918843811e-08	164520000	164630000	164710000	164770000	1292	0.606061	HCMV_507
chr1	164580000	164590000	chr1	164710000	164720000	37	5.67123217378116e-07	3.97487906690906e-05	164520000	164630000	164710000	164770000	1292	0.606061	HCMV_508
chr1	178510000	178520000	chr1	178690000	178700000	47	1.07616335784053e-27	1.267162489162e-24	178490000	178530000	178680000	178890000	843	0.47619	HCMV_509
chr1	178500000	178510000	chr1	178720000	178730000	29	7.90844049715731e-12	1.44851921907657e-09	178490000	178530000	178680000	178890000	843	0.47619	HCMV_510
chr1	178510000	178520000	chr1	178870000	178880000	17	3.60082441486555e-09	4.09327744795118e-07	178490000	178530000	178680000	178890000	843	0.47619	HCMV_511
chr1	178500000	178510000	chr1	178780000	178790000	18	4.30935496588978e-08	3.91200070891046e-06	178490000	178530000	178680000	178890000	843	0.47619	HCMV_512
chr1	178500000	178510000	chr1	178840000	178850000	18	6.7345555763605e-08	5.86018581747976e-06	178490000	178530000	178680000	178890000	843	0.47619	HCMV_513
chr1	178500000	178510000	chr1	178750000	178760000	20	9.34706532816223e-07	6.20085729963669e-05	178490000	178530000	178680000	178890000	843	0.47619	HCMV_514
chr1	178500000	178510000	chr1	178810000	178820000	11	0.000202812	0.00664047	178490000	178530000	178680000	178890000	843	0.47619	HCMV_515
chr1	234900000	234910000	chr1	235110000	235120000	50	3.08175869330532e-21	1.93396837596135e-18	234810000	234920000	235090000	235150000	861	0.606061	HCMV_516
chr1	234860000	234870000	chr1	235110000	235120000	37	1.49854218725596e-16	5.43727235730658e-14	234810000	234920000	235090000	235150000	861	0.606061	HCMV_517
chr1	234830000	234840000	chr1	235110000	235120000	29	5.0973848274538e-09	5.62467983958283e-07	234810000	234920000	235090000	235150000	861	0.606061	HCMV_518
chr1	234880000	234890000	chr1	235140000	235150000	15	1.36224778226482e-06	8.66710171460039e-05	234810000	234920000	235090000	235150000	861	0.606061	HCMV_519
chr1	1050000	1060000	chr1	1160000	1170000	35	1.414191227712e-20	8.2818607789671e-18	1030000	1140000	1110000	1220000	954	0.355372	HCMV_520
chr1	1090000	1100000	chr1	1120000	1130000	51	8.48743222393561e-13	1.80870365274504e-10	1030000	1140000	1110000	1220000	954	0.355372	HCMV_521
chr1	1050000	1060000	chr1	1200000	1210000	27	4.09507692045749e-12	7.86177054296597e-10	1030000	1140000	1110000	1220000	954	0.355372	HCMV_522
chr1	1080000	1090000	chr1	1200000	1210000	34	1.13391302060961e-11	2.0242973435497e-09	1030000	1140000	1110000	1220000	954	0.355372	HCMV_523
chr1	1120000	1130000	chr1	1160000	1170000	47	5.85227412034129e-10	7.74764464818381e-08	1030000	1140000	1110000	1220000	954	0.355372	HCMV_524
chr1	1080000	1090000	chr1	1160000	1170000	30	6.1542526096624e-10	8.1112576307379e-08	1030000	1140000	1110000	1220000	954	0.355372	HCMV_525
chr1	1050000	1060000	chr1	1130000	1140000	19	1.77427453415882e-07	1.40095951514391e-05	1030000	1140000	1110000	1220000	954	0.355372	HCMV_526
chr1	38460000	38470000	chr1	39290000	39300000	34	1.24090287440526e-30	1.86146084218943e-27	38440000	38540000	39260000	39350000	560	0.422222	HCMV_527
chr1	38460000	38470000	chr1	39320000	39330000	27	6.67087076180224e-23	4.99164973187185e-20	38440000	38540000	39260000	39350000	560	0.422222	HCMV_528
chr1	38520000	38530000	chr1	39290000	39300000	20	1.30898629035327e-15	4.19366985168193e-13	38440000	38540000	39260000	39350000	560	0.422222	HCMV_529
chr1	38490000	38500000	chr1	39280000	39290000	18	1.75176418581789e-14	4.79778834878903e-12	38440000	38540000	39260000	39350000	560	0.422222	HCMV_530
chr1	38490000	38500000	chr1	39310000	39320000	10	4.32848559265703e-06	0.000240701	38440000	38540000	39260000	39350000	560	0.422222	HCMV_531
chr1	38520000	38530000	chr1	39260000	39270000	8	7.49821444136335e-05	0.00285289	38440000	38540000	39260000	39350000	560	0.422222	HCMV_532
chr1	31270000	31280000	chr1	31380000	31390000	135	5.37356481402342e-99	3.16516748139615e-94	31230000	31340000	31350000	31410000	1718	0.560606	HCMV_533
chr1	31270000	31280000	chr1	31350000	31360000	39	2.4451896065286e-15	7.55574957576758e-13	31230000	31340000	31350000	31410000	1718	0.560606	HCMV_534
chr1	31240000	31250000	chr1	31380000	31390000	35	2.9406206606462e-15	8.98212285650122e-13	31230000	31340000	31350000	31410000	1718	0.560606	HCMV_535
chr1	31320000	31330000	chr1	31360000	31370000	49	1.83932061847011e-09	2.21252770516889e-07	31230000	31340000	31350000	31410000	1718	0.560606	HCMV_536
chr1	156110000	156120000	chr1	156190000	156200000	76	2.46423351777349e-32	4.23595188201204e-29	156050000	156150000	156160000	156230000	2209	0.6	HCMV_537
chr1	156060000	156070000	chr1	156180000	156190000	92	5.46229064507639e-31	8.4257915446262e-28	156050000	156150000	156160000	156230000	2209	0.6	HCMV_538
chr1	156140000	156150000	chr1	156180000	156190000	56	1.86552220120935e-07	1.46553027564831e-05	156050000	156150000	156160000	156230000	2209	0.6	HCMV_539
chr1	156060000	156070000	chr1	156210000	156220000	21	1.63744345473268e-05	0.00077008	156050000	156150000	156160000	156230000	2209	0.6	HCMV_540
chr1	36810000	36820000	chr1	36880000	36890000	161	7.80043232935642e-51	4.84058777384607e-47	36770000	36860000	36830000	36930000	3783	0.444444	HCMV_541
chr1	36810000	36820000	chr1	36830000	36840000	339	1.42426328976503e-40	4.65445292118749e-37	36770000	36860000	36830000	36930000	3783	0.444444	HCMV_542
chr1	36780000	36790000	chr1	36880000	36890000	74	3.7736470494254e-25	3.51965376196464e-22	36770000	36860000	36830000	36930000	3783	0.444444	HCMV_543
chr1	36850000	36860000	chr1	36880000	36890000	155	3.50505316564571e-22	2.43028487825296e-19	36770000	36860000	36830000	36930000	3783	0.444444	HCMV_544
chr1	36810000	36820000	chr1	36910000	36920000	47	7.63867246524997e-07	5.18375505812036e-05	36770000	36860000	36830000	36930000	3783	0.444444	HCMV_545
chr1	87790000	87800000	chr1	88410000	88420000	35	1.29795627553785e-31	2.10483263856879e-28	87780000	87820000	88390000	88590000	508	0.45	HCMV_546
chr1	87790000	87800000	chr1	88460000	88470000	25	2.94039529763025e-20	1.66380586779338e-17	87780000	87820000	88390000	88590000	508	0.45	HCMV_547
chr1	87790000	87800000	chr1	88510000	88520000	16	1.08781420955471e-11	1.94737886907412e-09	87780000	87820000	88390000	88590000	508	0.45	HCMV_548
chr1	87790000	87800000	chr1	88550000	88560000	13	1.99860505840994e-08	1.94798930581841e-06	87780000	87820000	88390000	88590000	508	0.45	HCMV_549
chr1	87790000	87800000	chr1	88580000	88590000	8	0.000247164	0.00784011	87780000	87820000	88390000	88590000	508	0.45	HCMV_550
chr1	153760000	153770000	chr1	153950000	153960000	47	5.54643075489437e-24	4.62556239169063e-21	153740000	153830000	153910000	153970000	1200	0.666667	HCMV_551
chr1	153770000	153780000	chr1	153910000	153920000	42	4.65279714110191e-15	1.38206713527361e-12	153740000	153830000	153910000	153970000	1200	0.666667	HCMV_552
chr1	153790000	153800000	chr1	153940000	153950000	40	7.20454497454126e-09	7.69960430788251e-07	153740000	153830000	153910000	153970000	1200	0.666667	HCMV_553
chr1	153810000	153820000	chr1	153910000	153920000	26	7.65846578713267e-06	0.000397078	153740000	153830000	153910000	153970000	1200	0.666667	HCMV_554
chr1	153820000	153830000	chr1	153940000	153950000	33	0.000256514	0.00808678	153740000	153830000	153910000	153970000	1200	0.666667	HCMV_555
chr1	40610000	40620000	chr1	40800000	40810000	47	2.04230097450897e-28	2.56038428581078e-25	40580000	40640000	40710000	40880000	891	0.352941	HCMV_556
chr1	40620000	40630000	chr1	40720000	40730000	59	2.04880035108676e-17	8.298729903898e-15	40580000	40640000	40710000	40880000	891	0.352941	HCMV_557
chr1	40620000	40630000	chr1	40760000	40770000	37	3.32374964309192e-16	1.152944284084e-13	40580000	40640000	40710000	40880000	891	0.352941	HCMV_558
chr1	40620000	40630000	chr1	40840000	40850000	27	8.7107547379876e-11	1.33807180794929e-08	40580000	40640000	40710000	40880000	891	0.352941	HCMV_559
chr1	40590000	40600000	chr1	40720000	40730000	26	7.78448338584815e-08	6.67683173500367e-06	40580000	40640000	40710000	40880000	891	0.352941	HCMV_560
chr1	40620000	40630000	chr1	40870000	40880000	18	4.20962820159577e-06	0.000234853	40580000	40640000	40710000	40880000	891	0.352941	HCMV_561
chr1	40580000	40590000	chr1	40780000	40790000	14	0.000225394	0.00725574	40580000	40640000	40710000	40880000	891	0.352941	HCMV_562
chr1	43380000	43390000	chr1	43530000	43540000	105	2.75425263596841e-73	5.35022218202051e-69	43370000	43450000	43500000	43570000	1720	0.625	HCMV_563
chr1	43430000	43440000	chr1	43520000	43530000	83	1.07534469367939e-29	1.49462025963261e-26	43370000	43450000	43500000	43570000	1720	0.625	HCMV_564
chr1	43400000	43410000	chr1	43500000	43510000	57	2.34439118121273e-15	7.2654620449342e-13	43370000	43450000	43500000	43570000	1720	0.625	HCMV_565
chr1	43400000	43410000	chr1	43560000	43570000	28	1.43012796582001e-06	9.04986691606119e-05	43370000	43450000	43500000	43570000	1720	0.625	HCMV_566
chr1	53950000	53960000	chr1	54190000	54200000	40	3.66090424326692e-25	3.41755424318426e-22	53920000	54060000	54180000	54240000	745	0.452381	HCMV_567
chr1	54000000	54010000	chr1	54200000	54210000	39	4.52876296383283e-17	1.75739630906768e-14	53920000	54060000	54180000	54240000	745	0.452381	HCMV_568
chr1	53950000	53960000	chr1	54230000	54240000	20	6.93128188061015e-11	1.08368684157167e-08	53920000	54060000	54180000	54240000	745	0.452381	HCMV_569
chr1	54040000	54050000	chr1	54190000	54200000	28	2.33571793223267e-07	1.79298484972433e-05	53920000	54060000	54180000	54240000	745	0.452381	HCMV_570
chr1	53920000	53930000	chr1	54200000	54210000	18	3.10172313935644e-07	2.31345502032877e-05	53920000	54060000	54180000	54240000	745	0.452381	HCMV_571
chr1	54870000	54880000	chr1	54950000	54960000	185	2.47943692802478e-94	1.18363424891928e-89	54710000	54900000	54920000	54980000	1304	0.307018	HCMV_572
chr1	54770000	54780000	chr1	54950000	54960000	36	9.96612371821825e-18	4.19766740186386e-15	54710000	54900000	54920000	54980000	1304	0.307018	HCMV_573
chr1	54730000	54740000	chr1	54950000	54960000	30	4.42524427511363e-16	1.5106384985698e-13	54710000	54900000	54920000	54980000	1304	0.307018	HCMV_574
chr1	54800000	54810000	chr1	54950000	54960000	35	8.64106963791004e-11	1.32826130287871e-08	54710000	54900000	54920000	54980000	1304	0.307018	HCMV_575
chr1	54840000	54850000	chr1	54950000	54960000	28	4.03231995429017e-08	3.68363092015298e-06	54710000	54900000	54920000	54980000	1304	0.307018	HCMV_576
chr1	54870000	54880000	chr1	54920000	54930000	68	5.93440389775089e-07	4.1395499339165e-05	54710000	54900000	54920000	54980000	1304	0.307018	HCMV_577
chr1	144530000	144540000	chr1	145040000	145050000	49	1.51668824534915e-41	5.29024191766668e-38	144520000	144550000	144980000	145120000	779	0.833333	HCMV_578
chr1	144530000	144540000	chr1	144990000	145000000	38	4.33378811954918e-27	4.82894797284223e-24	144520000	144550000	144980000	145120000	779	0.833333	HCMV_579
chr1	144530000	144540000	chr1	145070000	145080000	31	1.57086242851434e-21	1.01525974401819e-18	144520000	144550000	144980000	145120000	779	0.833333	HCMV_580
chr1	144530000	144540000	chr1	145110000	145120000	26	1.86462978299763e-17	7.59189644649783e-15	144520000	144550000	144980000	145120000	779	0.833333	HCMV_581
chr1	182110000	182120000	chr1	182360000	182370000	130	1.51210063686436e-118	1.84070984323418e-113	182040000	182190000	182330000	182420000	1198	0.274074	HCMV_582
chr1	182050000	182060000	chr1	182360000	182370000	73	1.86265503974855e-69	2.98348238434433e-65	182040000	182190000	182330000	182420000	1198	0.274074	HCMV_583
chr1	182160000	182170000	chr1	182360000	182370000	41	6.29487832905261e-22	4.25676096059414e-19	182040000	182190000	182330000	182420000	1198	0.274074	HCMV_584
chr1	182110000	182120000	chr1	182330000	182340000	35	1.58218206640899e-13	3.76592846057545e-11	182040000	182190000	182330000	182420000	1198	0.274074	HCMV_585
chr1	182080000	182090000	chr1	182360000	182370000	26	1.67222080106179e-12	3.40966572927882e-10	182040000	182190000	182330000	182420000	1198	0.274074	HCMV_586
chr1	182110000	182120000	chr1	182400000	182410000	20	1.65108958200951e-08	1.63801892337232e-06	182040000	182190000	182330000	182420000	1198	0.274074	HCMV_587
chr1	182920000	182930000	chr1	183240000	183250000	58	1.533318326925e-41	5.34569514451428e-38	182890000	183030000	183190000	183300000	909	0.272727	HCMV_588
chr1	182990000	183000000	chr1	183240000	183250000	52	1.27790565037041e-24	1.13438479363662e-21	182890000	183030000	183190000	183300000	909	0.272727	HCMV_589
chr1	182920000	182930000	chr1	183200000	183210000	34	9.85262417981895e-16	3.21377094918787e-13	182890000	183030000	183190000	183300000	909	0.272727	HCMV_590
chr1	183020000	183030000	chr1	183240000	183250000	37	2.70688654623633e-12	5.34521395290727e-10	182890000	183030000	183190000	183300000	909	0.272727	HCMV_591
chr1	182960000	182970000	chr1	183240000	183250000	29	2.41054533829777e-11	4.07792136333738e-09	182890000	183030000	183190000	183300000	909	0.272727	HCMV_592
chr1	182890000	182900000	chr1	183240000	183250000	19	4.37100229080453e-08	3.96205498873618e-06	182890000	183030000	183190000	183300000	909	0.272727	HCMV_593
chr1	182930000	182940000	chr1	183280000	183290000	14	5.5936545189465e-06	0.00030158	182890000	183030000	183190000	183300000	909	0.272727	HCMV_594
chr1	214510000	214520000	chr1	214720000	214730000	72	9.02983684646571e-40	2.78400961924711e-36	214490000	214640000	214720000	214790000	1290	0.342857	HCMV_595
chr1	214540000	214550000	chr1	214720000	214730000	76	9.24441706981147e-36	2.07181541073039e-32	214490000	214640000	214720000	214790000	1290	0.342857	HCMV_596
chr1	214620000	214630000	chr1	214720000	214730000	91	2.83061937462599e-25	2.66665959002703e-22	214490000	214640000	214720000	214790000	1290	0.342857	HCMV_597
chr1	214510000	214520000	chr1	214770000	214780000	40	1.0866889532846e-22	7.94344175970433e-20	214490000	214640000	214720000	214790000	1290	0.342857	HCMV_598
chr1	214580000	214590000	chr1	214720000	214730000	60	1.10707548986764e-17	4.6377909938647e-15	214490000	214640000	214720000	214790000	1290	0.342857	HCMV_599
chr1	214540000	214550000	chr1	214770000	214780000	29	2.04226941653601e-11	3.49596145877165e-09	214490000	214640000	214720000	214790000	1290	0.342857	HCMV_600
chr1	214620000	214630000	chr1	214750000	214760000	35	4.44371133471027e-06	0.000246324	214490000	214640000	214720000	214790000	1290	0.342857	HCMV_601
chr1	23880000	23890000	chr1	23960000	23970000	197	6.74655185517449e-99	3.94210092263538e-94	23850000	23910000	23900000	24020000	2619	0.458333	HCMV_602
chr1	23870000	23880000	chr1	24010000	24020000	70	1.12434329106696e-18	5.31012686828531e-16	23850000	23910000	23900000	24020000	2619	0.458333	HCMV_603
chr1	23880000	23890000	chr1	23930000	23940000	89	9.0977505331245e-18	3.85279897248203e-15	23850000	23910000	23900000	24020000	2619	0.458333	HCMV_604
chr1	23850000	23860000	chr1	23960000	23970000	42	1.69287148075877e-11	2.93968152920773e-09	23850000	23910000	23900000	24020000	2619	0.458333	HCMV_605
chr1	23880000	23890000	chr1	23900000	23910000	185	5.47526213098841e-11	8.71944567269418e-09	23850000	23910000	23900000	24020000	2619	0.458333	HCMV_606
chr1	32680000	32690000	chr1	32810000	32820000	70	9.56534728577259e-27	1.03090618587584e-23	32660000	32720000	32730000	32840000	1621	0.530303	HCMV_607
chr1	32680000	32690000	chr1	32750000	32760000	80	3.05105715915057e-17	1.20921760832106e-14	32660000	32720000	32730000	32840000	1621	0.530303	HCMV_608
chr1	32680000	32690000	chr1	32780000	32790000	62	8.7509791074516e-12	1.59071286977775e-09	32660000	32720000	32730000	32840000	1621	0.530303	HCMV_609
chr1	32710000	32720000	chr1	32750000	32760000	54	1.78734789042374e-07	1.41033689437881e-05	32660000	32720000	32730000	32840000	1621	0.530303	HCMV_610
chr1	32710000	32720000	chr1	32780000	32790000	39	9.33586382061335e-06	0.000472422	32660000	32720000	32730000	32840000	1621	0.530303	HCMV_611
chr1	95000000	95010000	chr1	95260000	95270000	94	2.92689576298618e-83	8.98227170058759e-79	94940000	95030000	95160000	95290000	1151	0.316239	HCMV_612
chr1	95000000	95010000	chr1	95180000	95190000	50	1.40101450018968e-25	1.35696791223928e-22	94940000	95030000	95160000	95290000	1151	0.316239	HCMV_613
chr1	94970000	94980000	chr1	95260000	95270000	26	3.07003316694667e-15	9.35355212474818e-13	94940000	95030000	95160000	95290000	1151	0.316239	HCMV_614
chr1	95000000	95010000	chr1	95220000	95230000	31	3.10354570140279e-15	9.44659247887085e-13	94940000	95030000	95160000	95290000	1151	0.316239	HCMV_615
chr1	94940000	94950000	chr1	95260000	95270000	20	3.54872773089229e-10	4.89058592629358e-08	94940000	95030000	95160000	95290000	1151	0.316239	HCMV_616
chr1	181000000	181010000	chr1	181110000	181120000	94	2.96737059344857e-47	1.49368928257475e-43	180960000	181090000	181080000	181140000	2159	0.448718	HCMV_617
chr1	181050000	181060000	chr1	181110000	181120000	110	2.11608629462223e-28	2.65061237812461e-25	180960000	181090000	181080000	181140000	2159	0.448718	HCMV_618
chr1	181080000	181090000	chr1	181100000	181110000	207	1.49326031553137e-13	3.56869671398967e-11	180960000	181090000	181080000	181140000	2159	0.448718	HCMV_619
chr1	180960000	180970000	chr1	181110000	181120000	44	3.25788041456208e-10	4.52012449931947e-08	180960000	181090000	181080000	181140000	2159	0.448718	HCMV_620
chr1	181000000	181010000	chr1	181080000	181090000	45	1.37771076396949e-05	0.000662861	180960000	181090000	181080000	181140000	2159	0.448718	HCMV_621
chr1	162600000	162610000	chr1	162760000	162770000	69	3.38723276854481e-37	8.51930798497393e-34	162550000	162650000	162700000	162780000	1032	0.4	HCMV_622
chr1	162570000	162580000	chr1	162760000	162770000	26	1.15890591918708e-13	2.81326568846619e-11	162550000	162650000	162700000	162780000	1032	0.4	HCMV_623
chr1	162600000	162610000	chr1	162710000	162720000	44	2.99038010834718e-12	5.86600717091876e-10	162550000	162650000	162700000	162780000	1032	0.4	HCMV_624
chr1	162630000	162640000	chr1	162740000	162750000	34	4.5135498975478e-07	3.24117098676631e-05	162550000	162650000	162700000	162780000	1032	0.4	HCMV_625
chr1	162570000	162580000	chr1	162710000	162720000	18	2.3012010386702e-06	0.000137876	162550000	162650000	162700000	162780000	1032	0.4	HCMV_626
chr1	178500000	178510000	chr1	178980000	178990000	64	4.50171261077352e-65	5.79216004973354e-61	178470000	178530000	178910000	179060000	690	0.366667	HCMV_627
chr1	178500000	178510000	chr1	179050000	179060000	24	5.61781825136127e-17	2.15549925650589e-14	178470000	178530000	178910000	179060000	690	0.366667	HCMV_628
chr1	178500000	178510000	chr1	178950000	178960000	22	9.6970149956484e-15	2.75299111334342e-12	178470000	178530000	178910000	179060000	690	0.366667	HCMV_629
chr1	178500000	178510000	chr1	179020000	179030000	20	5.38990872896737e-13	1.18469609942407e-10	178470000	178530000	178910000	179060000	690	0.366667	HCMV_630
chr1	178500000	178510000	chr1	178920000	178930000	20	3.03545061885975e-12	5.9494503320345e-10	178470000	178530000	178910000	179060000	690	0.366667	HCMV_631
chr1	178470000	178480000	chr1	178980000	178990000	11	2.60892410867794e-05	0.00115385	178470000	178530000	178910000	179060000	690	0.366667	HCMV_632
chr1	201970000	201980000	chr1	202080000	202090000	173	1.61741729392195e-124	2.46114235137247e-119	201950000	202030000	202040000	202130000	1631	0.458333	HCMV_633
chr1	202000000	202010000	chr1	202080000	202090000	66	8.77332855365526e-22	5.84721893812908e-19	201950000	202030000	202040000	202130000	1631	0.458333	HCMV_634
chr1	201970000	201980000	chr1	202110000	202120000	43	8.56766615404737e-15	2.45152123484045e-12	201950000	202030000	202040000	202130000	1631	0.458333	HCMV_635
chr1	201980000	201990000	chr1	202050000	202060000	58	9.62268569289183e-10	1.22295645102932e-07	201950000	202030000	202040000	202130000	1631	0.458333	HCMV_636
chr1	203300000	203310000	chr1	203450000	203460000	94	6.43561560181956e-52	4.20816550001886e-48	203240000	203350000	203390000	203490000	1145	0.318182	HCMV_637
chr1	203240000	203250000	chr1	203450000	203460000	59	1.35975215147175e-36	3.24665518622858e-33	203240000	203350000	203390000	203490000	1145	0.318182	HCMV_638
chr1	203320000	203330000	chr1	203410000	203420000	65	9.4495865547162e-16	3.08934270308176e-13	203240000	203350000	203390000	203490000	1145	0.318182	HCMV_639
chr1	203330000	203340000	chr1	203450000	203460000	48	4.07786458900125e-12	7.83099031739202e-10	203240000	203350000	203390000	203490000	1145	0.318182	HCMV_640
chr1	203310000	203320000	chr1	203480000	203490000	32	2.48591437106431e-05	0.0011071	203240000	203350000	203390000	203490000	1145	0.318182	HCMV_641
chr1	203270000	203280000	chr1	203450000	203460000	18	0.000286992	0.00888834	203240000	203350000	203390000	203490000	1145	0.318182	HCMV_642
chr1	21310000	21320000	chr1	21500000	21510000	41	1.14376944365147e-19	6.06064874298892e-17	21210000	21400000	21470000	21530000	817	0.298246	HCMV_643
chr1	21340000	21350000	chr1	21500000	21510000	36	2.58609707379288e-13	5.95912577437081e-11	21210000	21400000	21470000	21530000	817	0.298246	HCMV_644
chr1	21300000	21310000	chr1	21470000	21480000	45	3.32488231144057e-13	7.54065137786442e-11	21210000	21400000	21470000	21530000	817	0.298246	HCMV_645
chr1	21210000	21220000	chr1	21500000	21510000	26	1.04703453429572e-11	1.87953558338186e-09	21210000	21400000	21470000	21530000	817	0.298246	HCMV_646
chr1	21390000	21400000	chr1	21500000	21510000	43	1.13857173683293e-11	2.03206788264718e-09	21210000	21400000	21470000	21530000	817	0.298246	HCMV_647
[truncated: 97,168 more rows]

## Sheet: Loops only in uninfected
chr1	s1	e1	chr2	s2	e2	cc	P-Value_Bias	Q-Value_Bias	bin1_low	bin1_high	bin2_low	bin2_high	sumCC	StrongConn	loop_name
[truncated: 90,198 more rows]

[truncated: 1 more sheets: Loops only in HCMV]
