# Supplementary material for: Human cytomegalovirus infection coopts chromatin organization to diminish TEAD1 transcription factor activity
Source: bioRxiv preprint, doi:10.1101/2024.04.12.588762, version 4 (2025-06-02)
Supplement: Supplemental Dataset 7 [file 588762_file23.xlsx]

## Sheet: README
Human cytomegalovirus extensively re-organizes the human genome, diminishing TEAD1 transcription factor activity
This document contains high-level QC statistics for the ChIP-seq datasets.
Comments, additions, or subtractions should be addressed to the corresponding authors:
Leah Kottyan (Leah.Kottyan@cchmc.org)
Matt Weirauch (Matthew.Weirauch@cchmc.org)
sheet_name	Link			The columns in all RELI tabs are identical:
ENCODE QC summary	Go to sheet			Track	Data track of the library dataset.
HFF CTCF HCMV rep1 TF RELI	Go to sheet			Cell	Cells from which the library dataset was generated.
HFF CTCF HCMV rep1 nonTF RELI	Go to sheet			Label	Name of the library dataset.
HFF CTCF HCMV rep1 HOMER	Go to sheet			Overlap	Overlap count (number of peaks with intersecting genomic coordinates).
HFF CTCF HCMV rep2 TF RELI	Go to sheet			Total	Total number of peaks in the input set.
HFF CTCF HCMV rep2 nonTF RELI	Go to sheet			Ratio	Ratio of overlap count divided by total count.
HFF CTCF HCMV rep2 HOMER	Go to sheet			Mean	Expected mean of intersection count from 2000 permutation test.
HFF CTCF UI rep1 TF RELI	Go to sheet			STD	Standard deviation from 2000 permutation test.
HFF CTCF UI rep1 nonTF RELI	Go to sheet			Z-score	Z-score calculated from 2000 permutation test.
HFF CTCF UI rep1 HOMER	Go to sheet			Enrichment	Enrichment from 2000 permutation test (Overlap divided by Mean)
HFF CTCF UI rep2 TF RELI	Go to sheet			P-val	p-value calculated from 2000 permutation test.
HFF CTCF UI rep2 nonTF RELI	Go to sheet			Corrected P-val	Adjusted p-value usin Bonferroni correction.
HFF CTCF UI rep2 HOMER	Go to sheet			Null_Model	Null model used in this analysis.
HFF H3K27ac HCMV rep1 TF RELI	Go to sheet			Species	Species for the library dataset.
HFF H3K27ac HCMV rep1 nonTF REL	Go to sheet
HFF H3K27ac HCMV rep1 HOMER	Go to sheet			The columns in the all HOMER tabs are identical:
HFF H3K27ac HCMV rep2 TF REL	Go to sheet			Motif Name	Name of motif for a set of transcription factors. A given motif can have multiple TFs when the TFs have similar DNA binding domains. See Cis-BP database.
HFF H3K27ac HCMV rep2 nonTF REL	Go to sheet			Consensus	The consensus DNA binding site (IUPAC format).
HFF H3K27ac HCMV rep2 HOMER	Go to sheet			P-value	p-value calculated by HOMER.
HFF H3K27ac UI rep1 TF RELI	Go to sheet			Log P-value	The natural log of the HOMER p-value.
HFF H3K27ac UI rep1 nonTF RELI	Go to sheet			q-value (Benjamini)	Q-value from Benjamini adjustment.
HFF H3K27ac UI rep1 HOMER	Go to sheet			# of Target Sequences with Motif	Number of input sequences containing this motif.
HFF H3K27ac UI rep2 TF RELI	Go to sheet			% of Target Sequences with Motif	Percent of input sequences containing this motif.
HFF H3K27ac UI rep2 nonTF RELI	Go to sheet			# of Background Sequences with Motif	Number of background sequences containing this motif.
HFF H3K27ac UI rep2 HOMER	Go to sheet			% of Background Sequences with Motif	Percent of background sequences containing this motif.
HFF TEAD1 HCMV rep1 TF RELI	Go to sheet
HFF TEAD1 HCMV rep1 nonTF RELI	Go to sheet
HFF TEAD1 HCMV rep1 HOMER	Go to sheet
HFF TEAD1 HCMV rep2 TF RELI	Go to sheet
HFF TEAD1 HCMV rep2 nonTF RELI	Go to sheet
HFF TEAD1 HCMV rep2 HOMER	Go to sheet
HFF TEAD1 UI rep1 TF RELI	Go to sheet
HFF TEAD1 UI rep1 nonTF RELI	Go to sheet
HFF TEAD1 UI rep1 HOMER	Go to sheet
HFF TEAD1 UI rep2 TF RELI	Go to sheet
HFF TEAD1 UI rep2 nonTF RELI	Go to sheet
HFF TEAD1 UI rep2 HOMER	Go to sheet

## Sheet: ENCODE_QC_summary
Sample	Number of reads in fastq	Number of mapped reads	% Mapped reads	% Duplicate reads	Total reads (filtered/deduped bam)	Number of peaks (ENCODE standard p_value)	Number of peaks (q_value)	overlap conservative peaks	Number of idr peaks	FRiP(ENCODE standard p_value)	FRiP(overlap conservative peaks)
HFF CTCF UI rep1	48136418	44874157	93.2	12.2661	34261438	112322	66671	57936	43056	0.146586	0.126643
HFF CTCF UI rep2	58669488	53530058	91.2	13.0908	39891529	90314	70519			0.132689
HFF CTCF HCMV rep1	136115731	37206505	27.3	13.2413	27494538	142340	63821	54697	40457	0.150981	0.113201
HFF CTCF HCMV rep2	113350083	35523636	31.3	12.5781	26270208	124404	64447			0.12673
HFF TEAD1 UI rep1	46735341	42880148	91.8	14.18	32109023	117525	95426	75554	39580	0.12041	0.100533
HFF TEAD1 UI rep2	48688417	44637028	91.7	13.5047	33628084	120156	93387			0.112465
HFF TEAD1 HCMV rep1	49087486	29657622	60.4	15.4271	21714357	84507	13072	17567	6583	0.0425781	0.0162071
HFF TEAD1 HCMV rep2	56885737	35015000	61.6	16.9033	25017848	107275	20318			0.0515613
HFF H3K27ac UI rep1	45855399	43501661	94.9	10.3234	35018177	159383	132812	110308	N/A	0.325744	0.317452
HFF H3K27ac UI rep2	50014734	47474694	94.9	12.1567	37213254	167411	140373		N/A	0.329899
HFF H3K27ac HCMV rep1	68510817	41797826	61	9.7609	33146823	142542	89063	66644	N/A	0.2195	0.197403
HFF H3K27ac HCMV rep2	65495970	39248439	59.9	11.0743	30555157	128763	80674		N/A	0.218908

## Sheet: HFF_CTCF_HCMV_rep1_TF_RELI
Track	Cell	TF	Overlap	Total	Ratio	Mean	STD	Z-score	Enrichment	P-val	Corrected P-val	Null_Model	Species
Pazar_Chip	hESC	CTCF	50732	142340	0.356414	7463.6	1371.5	31.5482	6.79726	9.50436e-219	1.46747e-215	Null_Model_OpenChrom	human
TxnFactorChIPV3	HEK293	CTCF	41560	142340	0.291977	6884.2	1099.82	31.5286	6.03701	1.76044e-218	2.71813e-215	Null_Model_OpenChrom	human
TxnFactorChIPV3	HepG2	CTCF	47543	142340	0.33401	8900.19	1225.76	31.5256	5.3418	1.93547e-218	2.98836e-215	Null_Model_OpenChrom	human
TxnFactorChIPV3	H1-hESC	RAD21	48492	142340	0.340677	8574.36	1266.22	31.5249	5.65547	1.97721e-218	3.05281e-215	Null_Model_OpenChrom	human
TxnFactorChIPV3	HSMM	CTCF	42493	142340	0.298532	7567.24	1107.94	31.5232	5.61539	2.0918e-218	3.22975e-215	Null_Model_OpenChrom	human
TxnFactorChIPV3	HMF	CTCF	44425	142340	0.312105	7834.86	1160.76	31.5225	5.67017	2.13668e-218	3.29903e-215	Null_Model_OpenChrom	human
ReMap_ChIP	esc	CTCF	48626	142340	0.341619	8601.19	1269.74	31.522	5.6534	2.16789e-218	3.34723e-215	Null_Model_OpenChrom	human
TxnFactorChIPV3	SK-N-SH_RA	CTCF	42973	142340	0.301904	7601.37	1122.13	31.5219	5.65333	2.17461e-218	3.3576e-215	Null_Model_OpenChrom	human
TxnFactorChIPV3	HRPEpiC	CTCF	44719	142340	0.31417	7849.93	1169.63	31.5219	5.69674	2.17868e-218	3.36389e-215	Null_Model_OpenChrom	human
TxnFactorChIPV3	HBMEC	CTCF	46877	142340	0.329331	8699.16	1211.16	31.5218	5.38868	2.18126e-218	3.36787e-215	Null_Model_OpenChrom	human
TxnFactorChIPV3	HCT-116	CTCF	43421	142340	0.305051	7152.27	1150.61	31.5212	6.07094	2.22704e-218	3.43855e-215	Null_Model_OpenChrom	human
TxnFactorChIPV3	HeLa-S3	CTCF	47216	142340	0.331713	8881.51	1216.16	31.5211	5.31621	2.2356e-218	3.45177e-215	Null_Model_OpenChrom	human
TxnFactorChIPV3	GM12864	CTCF	40657	142340	0.285633	7026.26	1066.93	31.521	5.78644	2.24071e-218	3.45966e-215	Null_Model_OpenChrom	human
TxnFactorChIPV3	HPF	CTCF	40025	142340	0.281193	6978.91	1048.4	31.5204	5.73514	2.28244e-218	3.52409e-215	Null_Model_OpenChrom	human
TxnFactorChIPV3	RPTEC	CTCF	46730	142340	0.328298	8315.96	1218.71	31.5202	5.61931	2.30019e-218	3.5515e-215	Null_Model_OpenChrom	human
TxnFactorChIPV3	HA-sp	CTCF	41298	142340	0.290136	7076.66	1085.72	31.5195	5.8358	2.34447e-218	3.61985e-215	Null_Model_OpenChrom	human
ReMap_ChIP	mcf7_tam	CTCF	40047	142340	0.281347	6565.87	1062.24	31.5193	6.09926	2.36247e-218	3.64766e-215	Null_Model_OpenChrom	human
Pazar_Chip	HepG2	CTCF	38299	142340	0.269067	6131.26	1020.58	31.519	6.24652	2.38293e-218	3.67925e-215	Null_Model_OpenChrom	human
TxnFactorChIPV3	HFF-Myc	CTCF	40147	142340	0.28205	6549.8	1065.94	31.519	6.1295	2.38867e-218	3.68811e-215	Null_Model_OpenChrom	human
TxnFactorChIPV3	MCF-7+estrogen	CTCF	45574	142340	0.320177	8865.85	1164.64	31.5189	5.1404	2.39618e-218	3.6997e-215	Null_Model_OpenChrom	human
TxnFactorChIPV3	HCPEpiC	CTCF	46587	142340	0.327294	8935.88	1194.59	31.518	5.21348	2.45935e-218	3.79724e-215	Null_Model_OpenChrom	human
TxnFactorChIPV3	Gliobla	CTCF	47362	142340	0.332739	9081.29	1214.58	31.5176	5.21534	2.49296e-218	3.84913e-215	Null_Model_OpenChrom	human
TxnFactorChIPV3	H1-hESC	CTCF	50460	142340	0.354503	9676.61	1294.03	31.5166	5.21463	2.57379e-218	3.97393e-215	Null_Model_OpenChrom	human
TxnFactorChIPV3	GM12865	CTCF	39299	142340	0.276092	6711.04	1034	31.5164	5.85588	2.59218e-218	4.00233e-215	Null_Model_OpenChrom	human
TxnFactorChIPV3	HPAF	CTCF	45251	142340	0.317908	8337.24	1171.26	31.5163	5.42758	2.59484e-218	4.00644e-215	Null_Model_OpenChrom	human
TxnFactorChIPV3	GM12873	CTCF	42989	142340	0.302016	7577.44	1123.6	31.5163	5.67329	2.60091e-218	4.0158e-215	Null_Model_OpenChrom	human
TxnFactorChIPV3	GM12872	CTCF	40810	142340	0.286708	7035.9	1071.66	31.5158	5.80025	2.63966e-218	4.07563e-215	Null_Model_OpenChrom	human
TxnFactorChIPV3	HUVEC	CTCF	42096	142340	0.295743	7405.74	1100.73	31.5156	5.68424	2.65305e-218	4.09631e-215	Null_Model_OpenChrom	human
ReMap_ChIP	prec	CTCF	35641	142340	0.250393	5522.11	955.695	31.5152	6.45424	2.69106e-218	4.155e-215	Null_Model_OpenChrom	human
TxnFactorChIPV3	AG04450	CTCF	40201	142340	0.282429	7050.55	1051.89	31.5152	5.70182	2.69276e-218	4.15761e-215	Null_Model_OpenChrom	human
TxnFactorChIPV3	BE2_C	CTCF	43870	142340	0.308206	7701.06	1147.67	31.5151	5.69662	2.69769e-218	4.16523e-215	Null_Model_OpenChrom	human
TxnFactorChIPV3	A549	CTCF	47203	142340	0.331621	9088.04	1209.43	31.5147	5.19397	2.72823e-218	4.21238e-215	Null_Model_OpenChrom	human
TxnFactorChIPV3	HMEC	CTCF	45079	142340	0.316699	8314.26	1166.6	31.5145	5.42189	2.74601e-218	4.23983e-215	Null_Model_OpenChrom	human
TxnFactorChIPV3	Caco-2	CTCF	39697	142340	0.278889	6915.8	1040.2	31.5144	5.74005	2.75414e-218	4.25239e-215	Null_Model_OpenChrom	human
ReMap_ChIP	hepg2	CTCF	36301	142340	0.25503	6264.61	953.11	31.5141	5.79462	2.78449e-218	4.29925e-215	Null_Model_OpenChrom	human
TxnFactorChIPV3	MCF-7	CTCF	51305	142340	0.36044	10408.3	1297.75	31.5137	4.92925	2.82283e-218	4.35845e-215	Null_Model_OpenChrom	human
TxnFactorChIPV3	Dnd41	CTCF	40709	142340	0.285998	7284.45	1060.64	31.5135	5.58848	2.83625e-218	4.37917e-215	Null_Model_OpenChrom	human
TxnFactorChIPV3	HEEpiC	CTCF	39106	142340	0.274737	6796.07	1025.29	31.513	5.75421	2.88043e-218	4.44739e-215	Null_Model_OpenChrom	human
TxnFactorChIPV3	AG04449	CTCF	42317	142340	0.297295	7772.68	1096.21	31.5126	5.44433	2.91533e-218	4.50127e-215	Null_Model_OpenChrom	human
Pazar_Chip	MCF7+oestrogen	CTCF	40009	142340	0.281081	6815.8	1053.33	31.5125	5.87004	2.92474e-218	4.5158e-215	Null_Model_OpenChrom	human
TxnFactorChIPV3	HCM	CTCF	43072	142340	0.302599	7736.21	1121.34	31.512	5.56758	2.97332e-218	4.59081e-215	Null_Model_OpenChrom	human
TxnFactorChIPV3	HVMF	CTCF	41006	142340	0.288085	6979.85	1079.8	31.5116	5.87491	3.01667e-218	4.65774e-215	Null_Model_OpenChrom	human
TxnFactorChIPV3	HSMMtube	CTCF	40342	142340	0.28342	7114.37	1054.46	31.5114	5.6705	3.03449e-218	4.68525e-215	Null_Model_OpenChrom	human
ReMap_ChIP	mcf7_e2	CTCF	38402	142340	0.269791	6675.77	1006.83	31.5111	5.75244	3.05667e-218	4.71949e-215	Null_Model_OpenChrom	human
TxnFactorChIPV3	HAc	CTCF	39901	142340	0.280322	6974.29	1044.93	31.5111	5.72116	3.06472e-218	4.73193e-215	Null_Model_OpenChrom	human
TxnFactorChIPV3	HRE	CTCF	38665	142340	0.271638	6433.47	1022.87	31.5109	6.00998	3.07525e-218	4.74819e-215	Null_Model_OpenChrom	human
TxnFactorChIPV3	NH-A	CTCF	35368	142340	0.248475	5711.82	941.14	31.5109	6.19207	3.08029e-218	4.75597e-215	Null_Model_OpenChrom	human
TxnFactorChIPV3	Osteobl	CTCF	43605	142340	0.306344	7859.19	1134.4	31.5109	5.54828	3.08185e-218	4.75838e-215	Null_Model_OpenChrom	human
TxnFactorChIPV3	HCFaa	CTCF	37964	142340	0.266714	6270.72	1005.79	31.5108	6.05417	3.09126e-218	4.7729e-215	Null_Model_OpenChrom	human
TxnFactorChIPV3	GM12878	CTCF	46101	142340	0.323879	8914.57	1180.12	31.5106	5.17142	3.10428e-218	4.79301e-215	Null_Model_OpenChrom	human
TxnFactorChIPV3	NHLF	CTCF	38527	142340	0.270669	6621.18	1012.55	31.5104	5.81875	3.13266e-218	4.83683e-215	Null_Model_OpenChrom	human
TxnFactorChIPV3	IMR90	CTCF	39620	142340	0.278348	7050.21	1033.63	31.5102	5.61969	3.14756e-218	4.85983e-215	Null_Model_OpenChrom	human
TxnFactorChIPV3	AoAF	CTCF	39059	142340	0.274406	6975.05	1018.22	31.51	5.59982	3.16996e-218	4.89441e-215	Null_Model_OpenChrom	human
TxnFactorChIPV3	AG09319	CTCF	41754	142340	0.29334	7665.76	1081.84	31.5095	5.44682	3.21495e-218	4.96388e-215	Null_Model_OpenChrom	human
TxnFactorChIPV3	WERI-Rb-1	CTCF	40932	142340	0.287565	7372	1065.08	31.5094	5.55236	3.22798e-218	4.984e-215	Null_Model_OpenChrom	human
TxnFactorChIPV3	AG09309	CTCF	38981	142340	0.273858	6699.01	1024.52	31.5094	5.81892	3.23067e-218	4.98816e-215	Null_Model_OpenChrom	human
TxnFactorChIPV3	MCF-7+vehicle	CTCF	50866	142340	0.357356	10696.1	1274.86	31.5093	4.75557	3.24261e-218	5.0066e-215	Null_Model_OpenChrom	human
TxnFactorChIPV3	NB4	CTCF	35033	142340	0.246122	5650.14	932.522	31.509	6.20037	3.26631e-218	5.04318e-215	Null_Model_OpenChrom	human
TxnFactorChIPV3	SAEC	CTCF	38265	142340	0.268828	6593.84	1005.15	31.5088	5.80314	3.28892e-218	5.07809e-215	Null_Model_OpenChrom	human
TxnFactorChIPV3	HFF	CTCF	33287	142340	0.233856	5357.04	886.418	31.5088	6.21369	3.29116e-218	5.08156e-215	Null_Model_OpenChrom	human
TxnFactorChIPV3	K562	CTCF	47332	142340	0.332528	9413.7	1203.44	31.5082	5.02799	3.34888e-218	5.17067e-215	Null_Model_OpenChrom	human
TxnFactorChIPV3	NHEK	CTCF	48233	142340	0.338858	9482.14	1229.88	31.5079	5.08672	3.38058e-218	5.21962e-215	Null_Model_OpenChrom	human
TxnFactorChIPV3	GM12874	CTCF	34945	142340	0.245504	5823.14	924.271	31.5079	6.00106	3.3827e-218	5.2229e-215	Null_Model_OpenChrom	human
ReMap_ChIP	mcf7	CTCF	41444	142340	0.291162	7508.26	1077.07	31.5075	5.51978	3.431e-218	5.29747e-215	Null_Model_OpenChrom	human
TxnFactorChIPV3	K562	RAD21	30430	142340	0.213784	4511.87	822.605	31.5074	6.74443	3.44302e-218	5.31602e-215	Null_Model_OpenChrom	human
TxnFactorChIPV3	GM06990	CTCF	39589	142340	0.27813	6797.69	1040.76	31.5071	5.82389	3.47473e-218	5.36498e-215	Null_Model_OpenChrom	human
TxnFactorChIPV3	NHDF-Ad	CTCF	41544	142340	0.291865	7287.5	1087.27	31.5069	5.70072	3.49469e-218	5.3958e-215	Null_Model_OpenChrom	human
ReMap_ChIP	bl41	CTCF	23131	142340	0.162505	2769.75	646.3	31.5043	8.35129	3.78959e-218	5.85112e-215	Null_Model_OpenChrom	human
TxnFactorChIPV3	SK-N-SH_RA	RAD21	40615	142340	0.285338	7542.78	1049.77	31.5041	5.38462	3.81578e-218	5.89156e-215	Null_Model_OpenChrom	human
TxnFactorChIPV3	AG10803	CTCF	39950	142340	0.280666	7211.68	1039.21	31.5032	5.53962	3.93104e-218	6.06953e-215	Null_Model_OpenChrom	human
TxnFactorChIPV3	A549+DEX_100nM	CTCF	35893	142340	0.252164	5952.24	950.44	31.502	6.03016	4.07849e-218	6.29718e-215	Null_Model_OpenChrom	human
ReMap_ChIP	cd36_shluc	CTCF	31182	142340	0.219067	4824.6	836.703	31.5015	6.46312	4.14359e-218	6.3977e-215	Null_Model_OpenChrom	human
TxnFactorChIPV3	ProgFib	CTCF	38273	142340	0.268884	6758.18	1000.43	31.5012	5.66321	4.18816e-218	6.46652e-215	Null_Model_OpenChrom	human
TxnFactorChIPV3	HepG2	RAD21	40097	142340	0.281699	6828.13	1056.12	31.5011	5.87233	4.19448e-218	6.47628e-215	Null_Model_OpenChrom	human
TxnFactorChIPV3	GM12878	RAD21	32868	142340	0.230912	5310.27	874.833	31.5006	6.18951	4.26682e-218	6.58798e-215	Null_Model_OpenChrom	human
TxnFactorChIPV3	BJ	CTCF	39832	142340	0.279837	7005.36	1042.13	31.4997	5.68593	4.38735e-218	6.77407e-215	Null_Model_OpenChrom	human
TxnFactorChIPV3	NHDF-neo	CTCF	38891	142340	0.273226	7025.49	1011.62	31.4995	5.5357	4.40862e-218	6.8069e-215	Null_Model_OpenChrom	human
TxnFactorChIPV3	Fibrobl	CTCF	38501	142340	0.270486	7247.14	992.205	31.4994	5.31258	4.42769e-218	6.83636e-215	Null_Model_OpenChrom	human
ReMap_ChIP	asc	CTCF	43475	142340	0.305431	9045.85	1093.12	31.4963	4.80607	4.87507e-218	7.52711e-215	Null_Model_OpenChrom	human
TxnFactorChIPV3	GM12875	CTCF	35910	142340	0.252283	6041.56	948.336	31.4956	5.94383	4.98528e-218	7.69728e-215	Null_Model_OpenChrom	human
TxnFactorChIPV3	A549+EtOH_0.02pct	CTCF	34487	142340	0.242286	5699.26	914.046	31.4948	6.05114	5.11115e-218	7.89161e-215	Null_Model_OpenChrom	human
ReMap_ChIP	lncap	CTCF	33361	142340	0.234375	5457.35	886.024	31.4931	6.11304	5.39514e-218	8.3301e-215	Null_Model_OpenChrom	human
TxnFactorChIPV3	WI-38	CTCF	30075	142340	0.21129	4889.74	799.713	31.4929	6.15064	5.43738e-218	8.39532e-215	Null_Model_OpenChrom	human
ReMap_ChIP	mcf7_e2	STAG1	39045	142340	0.274308	7679.28	995.966	31.4928	5.08446	5.4569e-218	8.42546e-215	Null_Model_OpenChrom	human
Pazar_Chip	MCF7+oestrogen	STAG1	38726	142340	0.272067	7449.92	993.218	31.4896	5.19818	6.0228e-218	9.2992e-215	Null_Model_OpenChrom	human
Pazar_Chip	MCF7+oestrogen	RAD21	29524	142340	0.207419	4743.29	786.985	31.4881	6.22437	6.31308e-218	9.74739e-215	Null_Model_OpenChrom	human
TxnFactorChIPV3	GM12878	SMC3	25965	142340	0.182415	3987.85	697.951	31.4881	6.51102	6.32604e-218	9.76741e-215	Null_Model_OpenChrom	human
TxnFactorChIPV3	IMR90	RAD21	30793	142340	0.216334	4912.37	821.921	31.488	6.26846	6.34649e-218	9.79898e-215	Null_Model_OpenChrom	human
TxnFactorChIPV3	A549	RAD21	23076	142340	0.162119	3190.45	631.541	31.4874	7.23284	6.46959e-218	9.98904e-215	Null_Model_OpenChrom	human
ReMap_ChIP	mcf7_e2	RAD21	37303	142340	0.26207	7083.65	959.79	31.4854	5.26607	6.88794e-218	1.0635e-214	Null_Model_OpenChrom	human
ReMap_ChIP	mcf7_untreat	STAG1	38344	142340	0.269383	8051.96	962.175	31.4829	4.76207	7.45299e-218	1.15074e-214	Null_Model_OpenChrom	human
ReMap_ChIP	cd4	CTCF	22839	142340	0.160454	3136.82	625.819	31.4822	7.28094	7.60535e-218	1.17427e-214	Null_Model_OpenChrom	human
Pazar_Chip	HepG2	STAG1	34022	142340	0.239019	6344.08	879.243	31.4793	5.3628	8.35216e-218	1.28957e-214	Null_Model_OpenChrom	human
ReMap_ChIP	lcl_bcbl1	CTCF	34035	142340	0.239111	6541.53	873.402	31.4786	5.20291	8.53049e-218	1.31711e-214	Null_Model_OpenChrom	human
TxnFactorChIPV3	GM19238	CTCF	36983	142340	0.259822	7526.61	935.784	31.4778	4.91363	8.74977e-218	1.35096e-214	Null_Model_OpenChrom	human
ReMap_ChIP	cd36_shbrg1	CTCF	30301	142340	0.212878	4802.37	810.054	31.4777	6.30959	8.7708e-218	1.35421e-214	Null_Model_OpenChrom	human
TxnFactorChIPV3	K562	SMC3	22099	142340	0.155255	3156.7	601.785	31.4769	7.00067	9.00969e-218	1.3911e-214	Null_Model_OpenChrom	human
ReMap_ChIP	mcf7_untreat	RAD21	39269	142340	0.275882	7965.95	994.539	31.4749	4.92961	9.56588e-218	1.47697e-214	Null_Model_OpenChrom	human
TxnFactorChIPV3	GM19240	CTCF	35414	142340	0.248799	6961.35	904.038	31.4729	5.08723	1.02164e-217	1.57741e-214	Null_Model_OpenChrom	human
TxnFactorChIPV3	HeLa-S3	RAD21	30521	142340	0.214423	5424.02	797.459	31.4712	5.627	1.07675e-217	1.66251e-214	Null_Model_OpenChrom	human
TxnFactorChIPV3	HepG2	SMC3	24818	142340	0.174357	3940.88	663.392	31.4703	6.29759	1.10848e-217	1.7115e-214	Null_Model_OpenChrom	human
TxnFactorChIPV3	HeLa-S3	SMC3	29117	142340	0.20456	5298.93	756.878	31.4688	5.49488	1.15989e-217	1.79086e-214	Null_Model_OpenChrom	human
Cistrome_ChIP	Monocyte_CD14+	CTCF	32869	142340	0.230919	6586.74	835.186	31.4688	4.99018	1.16258e-217	1.79503e-214	Null_Model_OpenChrom	human
TxnFactorChIPV3	T-47D+DMSO_0.02pct	CTCF	26513	142340	0.186265	4411.83	702.327	31.4685	6.00952	1.17193e-217	1.80946e-214	Null_Model_OpenChrom	human
TxnFactorChIPV3	MCF-7+serum_starved_media	CTCF	36797	142340	0.258515	7921.27	917.707	31.4651	4.64534	1.30498e-217	2.01489e-214	Null_Model_OpenChrom	human
ReMap_ChIP	islet	CTCF	27063	142340	0.190129	4575.29	714.735	31.463	5.91504	1.39295e-217	2.15071e-214	Null_Model_OpenChrom	human
TxnFactorChIPV3	GM19239	CTCF	32004	142340	0.224842	6315.57	816.488	31.4621	5.06747	1.43381e-217	2.21381e-214	Null_Model_OpenChrom	human
TxnFactorChIPV3	GM12891	CTCF	31988	142340	0.22473	6612.2	806.553	31.4621	4.83772	1.43602e-217	2.21722e-214	Null_Model_OpenChrom	human
TxnFactorChIPV3	ECC-1+DMSO_0.02pct	CTCF	22632	142340	0.159	3494.97	608.258	31.462	6.47559	1.43816e-217	2.22052e-214	Null_Model_OpenChrom	human
ReMap_ChIP	hepg2	STAG1	31248	142340	0.219531	6304.67	792.846	31.4605	4.95633	1.50835e-217	2.32889e-214	Null_Model_OpenChrom	human
TxnFactorChIPV3	MCF-7+serum_stimulated_media	CTCF	38025	142340	0.267142	8542.65	937.149	31.4596	4.45119	1.55001e-217	2.39321e-214	Null_Model_OpenChrom	human
TxnFactorChIPV3	GM12892	CTCF	35201	142340	0.247302	7297.59	887.018	31.4575	4.82365	1.6552e-217	2.55563e-214	Null_Model_OpenChrom	human
ReMap_ChIP	jurkat	CTCF	16365	142340	0.114971	2130.83	452.503	31.4565	7.68011	1.71035e-217	2.64079e-214	Null_Model_OpenChrom	human
Pazar_Chip	HepG2	RAD21	23596	142340	0.165772	3907.53	626.045	31.4489	6.03859	2.16955e-217	3.34979e-214	Null_Model_OpenChrom	human
ReMap_ChIP	hela	CTCF	14930	142340	0.10489	1888.51	414.769	31.4428	7.90571	2.63086e-217	4.06205e-214	Null_Model_OpenChrom	human
ReMap_ChIP	lcl_hls554p	SMC1A	17910	142340	0.125825	2692.75	484.01	31.4399	6.6512	2.8817e-217	4.44934e-214	Null_Model_OpenChrom	human
ReMap_ChIP	hepg2	RAD21	21120	142340	0.148377	3575.87	558.25	31.427	5.90625	4.32516e-217	6.67804e-214	Null_Model_OpenChrom	human
TxnFactorChIPV3	HL-60	CTCF	16537	142340	0.11618	2584.97	444.237	31.4067	6.39736	8.1832e-217	1.26349e-213	Null_Model_OpenChrom	human
Cistrome_ChIP	HaematopoieticProgenitorCell	SMAD1	16906	142340	0.118772	2769.58	450.244	31.3973	6.10418	1.10199e-216	1.70147e-213	Null_Model_OpenChrom	human
TxnFactorChIPV3	H1-hESC	ZNF143	21166	142340	0.1487	4074.95	544.521	31.3873	5.19417	1.50653e-216	2.32608e-213	Null_Model_OpenChrom	human
ReMap_ChIP	fibro_wl38_a39	CTCF	16818	142340	0.118154	2801.7	446.623	31.3828	6.00278	1.73418e-216	2.67757e-213	Null_Model_OpenChrom	human
TxnFactorChIPV3	K562	ZNF143	19482	142340	0.136869	3891.73	496.802	31.3812	5.006	1.82389e-216	2.81608e-213	Null_Model_OpenChrom	human
TxnFactorChIPV3	GM12878	ZNF143	16069	142340	0.112892	2909.12	419.583	31.3642	5.52366	3.11402e-216	4.80805e-213	Null_Model_OpenChrom	human
Misc_ChIP	LoVo	CTCF	31372	142340	0.220402	9242.26	705.806	31.3538	3.39441	4.31089e-216	6.65602e-213	Null_Model_OpenChrom	human
ReMap_ChIP	lcl_bcbl1	SMC1A	22252	142340	0.15633	5328.89	540.007	31.3387	4.17573	6.93639e-216	1.07098e-212	Null_Model_OpenChrom	human
ReMap_ChIP	fibro_wl38_a95	CTCF	16733	142340	0.117557	3255.4	430.258	31.3245	5.14008	1.08258e-215	1.67151e-212	Null_Model_OpenChrom	human
TxnFactorChIPV3	K562	CTCFL	9851	142340	0.0692075	1425.06	269.06	31.3162	6.91268	1.40484e-215	2.16907e-212	Null_Model_OpenChrom	human
Misc_ChIP	LoVo	SMC3	41812	142340	0.293747	16554.2	808.727	31.2315	2.52576	1.98806e-214	3.06956e-211	Null_Model_OpenChrom	human
Misc_ChIP	LoVo	RAD21	45136	142340	0.3171	19044.7	835.668	31.2221	2.37	2.67474e-214	4.12979e-211	Null_Model_OpenChrom	human
Misc_ChIP	LoVo	SMC1A	37856	142340	0.265955	15257.5	725.575	31.1457	2.48115	2.90226e-213	4.48109e-210	Null_Model_OpenChrom	human
Cistrome_ChIP	H1	YY1	21088	142340	0.148152	7594.72	434.251	31.0725	2.77666	2.83392e-212	4.37557e-209	Null_Model_OpenChrom	human
ReMap_ChIP	hela	MYC	18307	142340	0.128615	6450.92	383.071	30.9501	2.83789	1.266e-210	1.95471e-207	Null_Model_OpenChrom	human
Cistrome_ChIP	CD8+	SPI1	21712	142340	0.152536	8849.91	416.601	30.8739	2.45336	1.33837e-209	2.06644e-206	Null_Model_OpenChrom	human
TxnFactorChIPV3	GM12878	YY1	15775	142340	0.110826	5360.3	337.537	30.855	2.94293	2.4035e-209	3.711e-206	Null_Model_OpenChrom	human
Cistrome_ChIP	HCT-116	YY1	17088	142340	0.120051	6283.81	350.601	30.8162	2.71937	7.94677e-209	1.22698e-205	Null_Model_OpenChrom	human
ReMap_ChIP	cd36	SMARCA4	8854	142340	0.0622032	2298.97	212.739	30.8126	3.8513	8.88988e-209	1.3726e-205	Null_Model_OpenChrom	human
ReMap_ChIP	cd4	SMARCA4	5018	142340	0.0352536	908.653	133.579	30.7633	5.52246	4.05914e-208	6.26731e-205	Null_Model_OpenChrom	human
TxnFactorChIPV3	K562	MAZ	15952	142340	0.11207	6129.82	319.763	30.7171	2.60236	1.68181e-207	2.59671e-204	Null_Model_OpenChrom	human
Cistrome_ChIP	Neuroectoderm	EP300	7954	142340	0.0558803	2116.08	190.243	30.6867	3.75884	4.28137e-207	6.61044e-204	Null_Model_OpenChrom	human
ReMap_ChIP	hesc	BRD4	13068	142340	0.0918083	4603.91	275.937	30.6741	2.83846	6.31547e-207	9.75109e-204	Null_Model_OpenChrom	human
Cistrome_ChIP	K562	NFYA	10289	142340	0.0722847	3251.55	229.888	30.6126	3.16434	4.16602e-206	6.43234e-203	Null_Model_OpenChrom	human
Cistrome_ChIP	CD56+	SPI1	25480	142340	0.179008	12557.9	422.77	30.5653	2.029	1.76984e-205	2.73264e-202	Null_Model_OpenChrom	human
TxnFactorChIPV3	GM12801	CTCF	2885	142340	0.0202684	461.737	79.317	30.5516	6.24814	2.69223e-205	4.1568e-202	Null_Model_OpenChrom	human
ReMap_ChIP	hsc	SMARCA4	12368	142340	0.0868905	4465.14	258.829	30.5331	2.7699	4.73335e-205	7.3083e-202	Null_Model_OpenChrom	human
ReMap_ChIP	esc	TAF2	7847	142340	0.0551286	2299.42	182.096	30.4652	3.4126	3.77184e-204	5.82372e-201	Null_Model_OpenChrom	human
ReMap_ChIP	hela	MAX	16769	142340	0.117809	7397.13	307.749	30.4529	2.26696	5.47712e-204	8.45667e-201	Null_Model_OpenChrom	human
Cistrome_ChIP	H1	GABPA	11457	142340	0.0804904	4211.68	238.128	30.4262	2.72029	1.23657e-203	1.90926e-200	Null_Model_OpenChrom	human
Cistrome_ChIP	H1	SP4	12902	142340	0.0906421	5049.28	258.175	30.4162	2.55522	1.67541e-203	2.58683e-200	Null_Model_OpenChrom	human
Cistrome_ChIP	H1	SPI1	22836	142340	0.160433	11641.2	368.598	30.3715	1.96166	6.54454e-203	1.01048e-199	Null_Model_OpenChrom	human
ReMap_ChIP	p493_6_0hr	MAX	12861	142340	0.0903541	5095.82	255.754	30.3619	2.52383	8.76112e-203	1.35272e-199	Null_Model_OpenChrom	human
Cistrome_ChIP	GM12891	YY1	12296	142340	0.0863847	4922.51	242.868	30.3601	2.49791	9.25216e-203	1.42853e-199	Null_Model_OpenChrom	human
Cistrome_ChIP	CUTLL1	BRD4	14196	142340	0.099733	6226.79	262.576	30.3501	2.27983	1.25097e-202	1.93151e-199	Null_Model_OpenChrom	human
TxnFactorChIPV3	H1-hESC	YY1	8803	142340	0.0618449	3080.8	188.762	30.3143	2.85737	3.71315e-202	5.7331e-199	Null_Model_OpenChrom	human
Cistrome_ChIP	MM1.S+5nm_JQ1	BRD4	16399	142340	0.11521	7683.86	287.557	30.3075	2.13421	4.56443e-202	7.04748e-199	Null_Model_OpenChrom	human
Cistrome_ChIP	P493-6	MAX	18524	142340	0.130139	8812.16	320.723	30.281	2.10209	1.01855e-201	1.57264e-198	Null_Model_OpenChrom	human
Cistrome_ChIP	CUTLL1	ETS1	19470	142340	0.136785	9748.77	322.054	30.1851	1.99717	1.86004e-200	2.87191e-197	Null_Model_OpenChrom	human
Cistrome_ChIP	A549	YY1	12474	142340	0.0876352	5394.17	234.949	30.1335	2.3125	8.81922e-200	1.36169e-196	Null_Model_OpenChrom	human
Cistrome_ChIP	K562	YY1	10168	142340	0.0714346	4059.21	202.874	30.1112	2.50492	1.72752e-199	2.66728e-196	Null_Model_OpenChrom	human
Cistrome_ChIP	CD3+	SPI1	12078	142340	0.0848532	5049.53	233.5	30.1005	2.3919	2.38427e-199	3.68131e-196	Null_Model_OpenChrom	human
Cistrome_ChIP	MCF-7	MYC	14379	142340	0.101019	6483.7	262.315	30.0985	2.21772	2.53247e-199	3.91013e-196	Null_Model_OpenChrom	human
Cistrome_ChIP	HEK293T	MYC	10431	142340	0.0732823	4265.15	205.035	30.0722	2.44564	5.59984e-199	8.64615e-196	Null_Model_OpenChrom	human
Artem-ChIP	CD4+_T_cells+invitrogen	POLR2A	22403	142340	0.157391	12698.7	323.298	30.0167	1.7642	2.97268e-198	4.58982e-195	Null_Model_OpenChrom	human
Cistrome_ChIP	MM1.S+50nm_JQ1	BRD4	14220	142340	0.0999016	6528.88	256.353	30.0021	2.17802	4.60214e-198	7.10571e-195	Null_Model_OpenChrom	human
Cistrome_ChIP	CUTLL1	EP300	9779	142340	0.0687017	4023.35	192.127	29.9575	2.43056	1.75859e-197	2.71526e-194	Null_Model_OpenChrom	human
Cistrome_ChIP	HepG2	YY1	12077	142340	0.0848461	5280.86	226.899	29.9523	2.28694	2.05384e-197	3.17112e-194	Null_Model_OpenChrom	human
Cistrome_ChIP	K562	MYC	9388	142340	0.0659548	3761.36	188.007	29.9278	2.4959	4.28309e-197	6.6131e-194	Null_Model_OpenChrom	human
ReMap_ChIP	helas3_stim	STAT1	10149	142340	0.0713011	4189.21	199.194	29.9195	2.42265	5.48319e-197	8.46604e-194	Null_Model_OpenChrom	human
Cistrome_ChIP	CD4+	KAT5	4754	142340	0.0333989	1386.97	112.684	29.8802	3.42762	1.77862e-196	2.74619e-193	Null_Model_OpenChrom	human
Cistrome_ChIP	K562+IGG-RAB	MAX	21114	142340	0.148335	11865	309.67	29.8672	1.77952	2.62486e-196	4.05278e-193	Null_Model_OpenChrom	human
Cistrome_ChIP	MM1.S+500nm_JQ1	BRD4	10751	142340	0.0755304	4610.82	205.586	29.8668	2.33169	2.65972e-196	4.10661e-193	Null_Model_OpenChrom	human
Cistrome_ChIP	MM1.S+DMSO	BRD4	15886	142340	0.111606	8110.52	260.892	29.8035	1.95869	1.76e-195	2.71744e-192	Null_Model_OpenChrom	human
Cistrome_ChIP	ME-1	EP300	18831	142340	0.132296	10264.6	287.687	29.7769	1.83456	3.89188e-195	6.00907e-192	Null_Model_OpenChrom	human
Cistrome_ChIP	T_Lymphocyte	EP300	9779	142340	0.0687017	4027.15	193.186	29.7737	2.42827	4.28544e-195	6.61672e-192	Null_Model_OpenChrom	human
TxnFactorChIPV3	HeLa-S3	RFX5	7480	142340	0.0525502	2894.66	154.031	29.7689	2.58407	4.93466e-195	7.61912e-192	Null_Model_OpenChrom	human
ReMap_ChIP	293t	TBL1	8471	142340	0.0595124	3342.9	172.297	29.7631	2.53403	5.86131e-195	9.04987e-192	Null_Model_OpenChrom	human
Cistrome_ChIP	U2OS	MYC	7237	142340	0.0508431	2780.69	149.902	29.7282	2.60259	1.6599e-194	2.56289e-191	Null_Model_OpenChrom	human
ReMap_ChIP	k562	NFYA	9399	142340	0.066032	3937.86	183.74	29.7221	2.38683	1.99209e-194	3.07578e-191	Null_Model_OpenChrom	human
Cistrome_ChIP	GM12878	MAX	8788	142340	0.0617395	3857.57	165.998	29.7018	2.27812	3.64361e-194	5.62573e-191	Null_Model_OpenChrom	human
ReMap_ChIP	skno1_leukemic	CBFB	7007	142340	0.0492272	2485.7	152.228	29.7008	2.81893	3.74463e-194	5.78171e-191	Null_Model_OpenChrom	human
ReMap_ChIP	a549	NFKB1	17946	142340	0.126078	9867.55	272.953	29.5965	1.81869	8.28172e-193	1.2787e-189	Null_Model_OpenChrom	human
Cistrome_ChIP	H2171	BRD4	18985	142340	0.133378	10909.6	273.083	29.5713	1.74022	1.74873e-192	2.70003e-189	Null_Model_OpenChrom	human
Cistrome_ChIP	ME-1	ELF1	8584	142340	0.0603063	3676.24	166.091	29.5487	2.335	3.41614e-192	5.27452e-189	Null_Model_OpenChrom	human
ReMap_ChIP	cd4+tcell_jq1	BRD4	5583	142340	0.039223	2008.37	120.994	29.544	2.77987	3.92279e-192	6.05679e-189	Null_Model_OpenChrom	human
ReMap_ChIP	mm1s_jq1_500nm	CDK9	9585	142340	0.0673388	4286.93	179.341	29.5419	2.23586	4.16768e-192	6.4349e-189	Null_Model_OpenChrom	human
TxnFactorChIPV3	PFSK-1	FOXP2	7375	142340	0.0518126	3024.38	147.423	29.5111	2.43851	1.03625e-191	1.59997e-188	Null_Model_OpenChrom	human
TxnFactorChIPV3	MCF-7+vehicle	MYC	11190	142340	0.0786146	5378.2	197.09	29.4881	2.08062	2.0432e-191	3.15471e-188	Null_Model_OpenChrom	human
Cistrome_ChIP	MDA-MB-453	MYC	9026	142340	0.0634115	3928.66	172.883	29.4844	2.29748	2.28079e-191	3.52153e-188	Null_Model_OpenChrom	human
TxnFactorChIPV3	HeLa-S3	ZNF143	3875	142340	0.0272235	1135.17	92.9943	29.4623	3.41357	4.38274e-191	6.76695e-188	Null_Model_OpenChrom	human
ReMap_ChIP	293T_ctl	NCOR1	5034	142340	0.035366	1762.47	111.152	29.4329	2.85622	1.0412e-190	1.60761e-187	Null_Model_OpenChrom	human
TxnFactorChIPV3	K562	MAX	15312	142340	0.107573	8307.54	238.071	29.4217	1.84314	1.45015e-190	2.23904e-187	Null_Model_OpenChrom	human
Cistrome_ChIP	P493-6+T1	MAX	11724	142340	0.0823662	5737.77	203.958	29.3503	2.0433	1.18278e-189	1.82621e-186	Null_Model_OpenChrom	human
TxnFactorChIPV3	HepG2	YY1	8120	142340	0.0570465	3566.26	155.315	29.3193	2.2769	2.93948e-189	4.53856e-186	Null_Model_OpenChrom	human
Cistrome_ChIP	MM1.S+5um_JQ1	BRD4	8818	142340	0.0619503	3939.96	166.398	29.3155	2.2381	3.28709e-189	5.07527e-186	Null_Model_OpenChrom	human
Cistrome_ChIP	GM06993	TP53	8428	142340	0.0592103	3806.36	157.961	29.2581	2.21419	1.7698e-188	2.73257e-185	Null_Model_OpenChrom	human
TxnFactorChIPV3	K562+IFNg30	MYC	11820	142340	0.0830406	5855.6	203.867	29.2564	2.01858	1.86377e-188	2.87765e-185	Null_Model_OpenChrom	human
ReMap_ChIP	cd34+nr29_normal	ERG	8421	142340	0.0591612	3714.55	160.903	29.2503	2.26703	2.2282e-188	3.44035e-185	Null_Model_OpenChrom	human
ReMap_ChIP	bcell	SMARCA4	1937	142340	0.0136083	400.438	52.5439	29.2434	4.83721	2.72224e-188	4.20314e-185	Null_Model_OpenChrom	human
ReMap_ChIP	sclc_h2171_dmso	BRD4	8443	142340	0.0593157	3866.42	156.575	29.2293	2.18368	4.11918e-188	6.36001e-185	Null_Model_OpenChrom	human
ReMap_ChIP	lcl_bl41	MYC	7327	142340	0.0514753	3157.97	142.714	29.2125	2.32016	6.72542e-188	1.0384e-184	Null_Model_OpenChrom	human
TxnFactorChIPV3	K562	ZBTB7A	8271	142340	0.0581073	3630.86	159.047	29.1747	2.27798	2.02794e-187	3.13114e-184	Null_Model_OpenChrom	human
TxnFactorChIPV3	HCT-116	YY1	6102	142340	0.0428692	2508.91	123.269	29.1485	2.43214	4.36256e-187	6.7358e-184	Null_Model_OpenChrom	human
TxnFactorChIPV3	GM12891	YY1	6630	142340	0.0465786	2730.86	133.981	29.1022	2.42781	1.68122e-186	2.5958e-183	Null_Model_OpenChrom	human
Cistrome_ChIP	GM12892	PAX5	7829	142340	0.0550021	3442.51	150.73	29.1016	2.27421	1.71135e-186	2.64233e-183	Null_Model_OpenChrom	human
TxnFactorChIPV3	H1-hESC	SIN3A	9383	142340	0.0659196	4528.58	166.933	29.08	2.07195	3.21399e-186	4.9624e-183	Null_Model_OpenChrom	human
ReMap_ChIP	a375	TFAP2C	14941	142340	0.104967	8430.73	223.878	29.0795	1.77221	3.25682e-186	5.02853e-183	Null_Model_OpenChrom	human
Cistrome_ChIP	A549	RELA	16405	142340	0.115252	9376.07	241.92	29.0548	1.74967	6.69199e-186	1.03324e-182	Null_Model_OpenChrom	human
Cistrome_ChIP	GM12878	ELF1	13098	142340	0.0920191	7165.4	204.304	29.0381	1.82795	1.08646e-185	1.67749e-182	Null_Model_OpenChrom	human
Cistrome_ChIP	HEK293T	BRD4	8790	142340	0.0617535	4035.22	163.82	29.0245	2.17832	1.61652e-185	2.49591e-182	Null_Model_OpenChrom	human
TxnFactorChIPV3	GM12878	ELF1	8645	142340	0.0607349	4049.9	158.359	29.017	2.13462	2.01028e-185	3.10387e-182	Null_Model_OpenChrom	human
Cistrome_ChIP	K562	ELF1	15328	142340	0.107686	8579.91	232.834	28.9824	1.7865	5.48512e-185	8.46902e-182	Null_Model_OpenChrom	human
TxnFactorChIPV3	A549+DEX_100nM	CREB1	6309	142340	0.0443235	2570.62	129.009	28.9777	2.45427	6.2797e-185	9.69586e-182	Null_Model_OpenChrom	human
Cistrome_ChIP	HepG2	ELF1	10210	142340	0.0717297	5143.79	175.056	28.9405	1.98492	1.84734e-184	2.85229e-181	Null_Model_OpenChrom	human
TxnFactorChIPV3	K562	YY1	8981	142340	0.0630954	4311.81	161.384	28.9322	2.08288	2.35222e-184	3.63183e-181	Null_Model_OpenChrom	human
TxnFactorChIPV3	NB4	MAX	11201	142340	0.0786919	5862.91	184.617	28.9144	1.91048	3.93068e-184	6.06897e-181	Null_Model_OpenChrom	human
ReMap_ChIP	mm1s_jq1_500nm	BRD4	3825	142340	0.0268723	1238.26	89.4802	28.9085	3.08901	4.66897e-184	7.2089e-181	Null_Model_OpenChrom	human
Cistrome_ChIP	VCaP	BRD2	6289	142340	0.0441829	2648.65	126.022	28.8867	2.37442	8.77724e-184	1.35521e-180	Null_Model_OpenChrom	human
Cistrome_ChIP	H1	MYC	3176	142340	0.0223128	1016.71	74.8034	28.8662	3.1238	1.58548e-183	2.44798e-180	Null_Model_OpenChrom	human
Cistrome_ChIP	LY1+JQ1	BRD4	6371	142340	0.044759	2799.26	124.027	28.7981	2.27596	1.13142e-182	1.74692e-179	Null_Model_OpenChrom	human
Pazar_Chip	H1	TAF1	6699	142340	0.0470634	2973.49	129.777	28.7071	2.25291	1.55611e-181	2.40264e-178	Null_Model_OpenChrom	human
ReMap_ChIP	bgo3	POU5F1	9016	142340	0.0633413	4562.76	155.158	28.7012	1.976	1.84127e-181	2.84292e-178	Null_Model_OpenChrom	human
ReMap_ChIP	hct116	SP1	9538	142340	0.0670086	4926.97	160.674	28.698	1.93588	2.01773e-181	3.11537e-178	Null_Model_OpenChrom	human
Cistrome_ChIP	ECC-1	YY1	7788	142340	0.0547141	3781.39	139.644	28.6915	2.05956	2.43413e-181	3.75829e-178	Null_Model_OpenChrom	human
TxnFactorChIPV3	H1-hESC	GABPA	3489	142340	0.0245117	1170.9	80.9411	28.6393	2.97975	1.08889e-180	1.68125e-177	Null_Model_OpenChrom	human
TxnFactorChIPV3	K562	E2F6	8972	142340	0.0630322	4515.44	155.697	28.6233	1.98696	1.72476e-180	2.66302e-177	Null_Model_OpenChrom	human
Cistrome_ChIP	EndothelialCell	MYC	9116	142340	0.0640438	4632.11	156.716	28.6116	1.968	2.40969e-180	3.72056e-177	Null_Model_OpenChrom	human
Cistrome_ChIP	GM12892	YY1	6921	142340	0.048623	3082.65	134.171	28.608	2.24515	2.67203e-180	4.12562e-177	Null_Model_OpenChrom	human
ReMap_ChIP	k562_leukemic	ERG	6811	142340	0.0478502	3062.19	131.064	28.6028	2.22422	3.09773e-180	4.7829e-177	Null_Model_OpenChrom	human
TxnFactorChIPV3	MCF-7+serum_stimulated_media	MYC	8726	142340	0.0613039	4301.78	154.734	28.5925	2.02846	4.16362e-180	6.42862e-177	Null_Model_OpenChrom	human
TxnFactorChIPV3	K562	RCOR1	9563	142340	0.0671842	4987.31	160.681	28.4769	1.91747	1.13337e-178	1.74993e-175	Null_Model_OpenChrom	human
TxnFactorChIPV3	H1-hESC	TEAD4	5767	142340	0.0405157	2555.13	112.817	28.4696	2.25703	1.3933e-178	2.15125e-175	Null_Model_OpenChrom	human
Cistrome_ChIP	HPB-ALL	NOTCH1	15552	142340	0.10926	9291.2	220.106	28.4445	1.67384	2.84977e-178	4.40005e-175	Null_Model_OpenChrom	human
Cistrome_ChIP	HeLa-S3	MYC	8683	142340	0.0610018	4484.97	147.968	28.3712	1.93602	2.28917e-177	3.53448e-174	Null_Model_OpenChrom	human
Cistrome_ChIP	CD4+	YY1	4335	142340	0.0304552	1716.29	92.3487	28.3568	2.5258	3.45119e-177	5.32863e-174	Null_Model_OpenChrom	human
ReMap_ChIP	mcf7_cancer	ERG	11136	142340	0.0782352	6222.76	173.409	28.3332	1.78956	6.73767e-177	1.0403e-173	Null_Model_OpenChrom	human
TxnFactorChIPV3	K562	ELF1	8509	142340	0.0597794	4339.4	147.185	28.329	1.96087	7.60185e-177	1.17372e-173	Null_Model_OpenChrom	human
Cistrome_ChIP	GM12878	IRF4	12736	142340	0.0894759	7301.69	191.937	28.313	1.74425	1.19602e-176	1.84665e-173	Null_Model_OpenChrom	human
ReMap_ChIP	k562	E2F6	7248	142340	0.0509203	3499.5	132.417	28.3083	2.07115	1.36553e-176	2.10838e-173	Null_Model_OpenChrom	human
TxnFactorChIPV3	H1-hESC	TBP	7063	142340	0.0496206	3406	129.196	28.3058	2.07369	1.46753e-176	2.26587e-173	Null_Model_OpenChrom	human
TxnFactorChIPV3	HeLa-S3	MAZ	6339	142340	0.0445342	3003.06	118.005	28.2696	2.11085	4.09299e-176	6.31957e-173	Null_Model_OpenChrom	human
ReMap_ChIP	bcellp493-6	MAX	7099	142340	0.0498735	3476.49	128.307	28.2333	2.042	1.14187e-175	1.76305e-172	Null_Model_OpenChrom	human
TxnFactorChIPV3	K562	MYC	9569	142340	0.0672264	5099.2	158.676	28.1693	1.87657	6.94853e-175	1.07285e-171	Null_Model_OpenChrom	human
Cistrome_ChIP	VCaP+BET762	BRD4	5952	142340	0.0418154	2690.8	115.804	28.1614	2.21198	8.68209e-175	1.34051e-171	Null_Model_OpenChrom	human
Cistrome_ChIP	H1	EP300	5237	142340	0.0367922	2279.89	105.035	28.1537	2.29704	1.08096e-174	1.66901e-171	Null_Model_OpenChrom	human
TxnFactorChIPV3	H1-hESC	BACH1	4427	142340	0.0311016	1750.77	95.0726	28.1493	2.5286	1.22211e-174	1.88694e-171	Null_Model_OpenChrom	human
Cistrome_ChIP	HepG2	MAX	8299	142340	0.0583041	4223.73	144.794	28.1454	1.96485	1.36544e-174	2.10824e-171	Null_Model_OpenChrom	human
TxnFactorChIPV3	SK-N-SH_RA	YY1	6376	142340	0.0447942	3004.96	119.788	28.1418	2.12183	1.50935e-174	2.33044e-171	Null_Model_OpenChrom	human
Cistrome_ChIP	VCaP+DMSO	BRD4	7014	142340	0.0492764	3417.09	127.925	28.1173	2.05262	3.00938e-174	4.64649e-171	Null_Model_OpenChrom	human
TxnFactorChIPV3	GM12892	PAX5	4285	142340	0.030104	1744.9	90.3975	28.0992	2.45573	5.00288e-174	7.72444e-171	Null_Model_OpenChrom	human
Cistrome_ChIP	T_Lymphocyte	YY1	4335	142340	0.0304552	1714.74	93.3195	28.0784	2.52808	8.98933e-174	1.38795e-170	Null_Model_OpenChrom	human
ReMap_ChIP	mdamd453	TFAP2C	8906	142340	0.0625685	4820.08	145.646	28.0538	1.84769	1.79682e-173	2.77429e-170	Null_Model_OpenChrom	human
Cistrome_ChIP	ME-1	FLI1	3070	142340	0.0215681	1084.82	70.8082	28.036	2.82995	2.96139e-173	4.57239e-170	Null_Model_OpenChrom	human
TxnFactorChIPV3	HepG2	MXI1	7628	142340	0.05359	3995.52	129.7	28.0068	1.90914	6.71138e-173	1.03624e-169	Null_Model_OpenChrom	human
TxnFactorChIPV3	GM12892	YY1	6327	142340	0.0444499	3030.67	117.721	28.0013	2.08766	7.83505e-173	1.20973e-169	Null_Model_OpenChrom	human
TxnFactorChIPV3	HepG2	MAZ	5612	142340	0.0394267	2652.2	105.773	27.9826	2.11598	1.32308e-172	2.04283e-169	Null_Model_OpenChrom	human
ReMap_ChIP	hela	PHF8	6993	142340	0.0491288	3564.28	122.702	27.9436	1.96197	3.9432e-172	6.08831e-169	Null_Model_OpenChrom	human
TxnFactorChIPV3	GM12878	MAZ	7654	142340	0.0537727	3968.02	131.922	27.9407	1.92892	4.27959e-172	6.60768e-169	Null_Model_OpenChrom	human
Cistrome_ChIP	U937	FLI1	9135	142340	0.0641773	5103.71	144.284	27.94	1.78987	4.35936e-172	6.73085e-169	Null_Model_OpenChrom	human
Cistrome_ChIP	MM1.S	MYC	9757	142340	0.0685471	5402.7	155.886	27.9326	1.80595	5.35789e-172	8.27258e-169	Null_Model_OpenChrom	human
ReMap_ChIP	esch9	FOXP1	2396	142340	0.0168329	761.988	58.5049	27.9295	3.14441	5.85096e-172	9.03389e-169	Null_Model_OpenChrom	human
ReMap_ChIP	293t	GPS2	4002	142340	0.0281158	1675.17	83.4303	27.8895	2.38901	1.7888e-171	2.76191e-168	Null_Model_OpenChrom	human
Cistrome_ChIP	MM1.S	BRD3	6000	142340	0.0421526	2796.37	114.9	27.8819	2.14564	2.20951e-171	3.41149e-168	Null_Model_OpenChrom	human
ReMap_ChIP	huvec_vegf12hr	ETS1	10917	142340	0.0766966	6349.68	163.981	27.8528	1.7193	4.98528e-171	7.69727e-168	Null_Model_OpenChrom	human
ReMap_ChIP	skbr3	TFAP2C	15772	142340	0.110805	10017	206.686	27.8444	1.57453	6.30299e-171	9.73182e-168	Null_Model_OpenChrom	human
Cistrome_ChIP	HeLa-S3	MAX	11023	142340	0.0774413	6382.44	166.784	27.8238	1.72708	1.1176e-170	1.72557e-167	Null_Model_OpenChrom	human
Cistrome_ChIP	HeLa	BRD4	3499	142340	0.024582	1407.16	75.2048	27.8152	2.48657	1.41921e-170	2.19126e-167	Null_Model_OpenChrom	human
Pazar_Chip	H9	FOXP1	2398	142340	0.016847	782.455	58.1018	27.8054	3.06471	1.86402e-170	2.87804e-167	Null_Model_OpenChrom	human
TxnFactorChIPV3	NB4	MYC	9038	142340	0.0634959	4968.12	146.373	27.8048	1.8192	1.89987e-170	2.93339e-167	Null_Model_OpenChrom	human
ReMap_ChIP	esc	SOX2	3929	142340	0.0276029	1638.76	82.4353	27.7822	2.39754	3.55667e-170	5.4915e-167	Null_Model_OpenChrom	human
Cistrome_ChIP	P493-6+T24	MAX	6110	142340	0.0429254	2952.74	113.732	27.7605	2.06926	6.50457e-170	1.00431e-166	Null_Model_OpenChrom	human
Misc_ChIP	LoVo	GLIS1	3839	142340	0.0269706	1584.7	81.2274	27.753	2.42255	8.01073e-170	1.23686e-166	Null_Model_OpenChrom	human
TxnFactorChIPV3	U87	REST	5076	142340	0.0356611	2229.6	102.638	27.7324	2.27664	1.42151e-169	2.19481e-166	Null_Model_OpenChrom	human
ReMap_ChIP	plasma_dmso	BRD4	4194	142340	0.0294647	1788.51	86.8275	27.7042	2.34496	3.10697e-169	4.79716e-166	Null_Model_OpenChrom	human
Pazar_Chip	hESC	NANOG	11515	142340	0.0808979	6874.54	167.666	27.6768	1.67502	6.63322e-169	1.02417e-165	Null_Model_OpenChrom	human
TxnFactorChIPV3	H1-hESC	TAF1	8068	142340	0.0566812	4379.54	133.431	27.6432	1.8422	1.683e-168	2.59855e-165	Null_Model_OpenChrom	human
ReMap_ChIP	k562_leukemic_72hrdox	ERG	8142	142340	0.0572011	4408.56	135.103	27.634	1.84686	2.17558e-168	3.35909e-165	Null_Model_OpenChrom	human
ReMap_ChIP	sclc_h2171	MYC	7765	142340	0.0545525	4135.11	131.594	27.5841	1.87782	8.63151e-168	1.3327e-164	Null_Model_OpenChrom	human
Cistrome_ChIP	H128	MAX	14179	142340	0.0996136	9118.52	183.647	27.5555	1.55497	1.90147e-167	2.93587e-164	Null_Model_OpenChrom	human
TxnFactorChIPV3	K562	UBTF	5979	142340	0.0420051	2960.01	109.644	27.5345	2.01992	3.39271e-167	5.23834e-164	Null_Model_OpenChrom	human
TxnFactorChIPV3	H1-hESC	JUND	4814	142340	0.0338204	2245.12	93.4157	27.4995	2.14421	8.90658e-167	1.37518e-163	Null_Model_OpenChrom	human
Pazar_Chip	HPC	GABPA	4093	142340	0.0287551	1801.54	83.3296	27.4988	2.27195	9.07185e-167	1.40069e-163	Null_Model_OpenChrom	human
ReMap_ChIP	hct116	TAF3	3892	142340	0.027343	1707.09	79.4674	27.4945	2.27991	1.02214e-166	1.57819e-163	Null_Model_OpenChrom	human
Cistrome_ChIP	Saos-2	TP53	5941	142340	0.0417381	2994.61	107.271	27.4669	1.9839	2.18459e-166	3.37301e-163	Null_Model_OpenChrom	human
ReMap_ChIP	esc	NANOG	12196	142340	0.0856822	7514.25	170.507	27.4579	1.62305	2.79912e-166	4.32185e-163	Null_Model_OpenChrom	human
Cistrome_ChIP	ME-1	SPI1	4277	142340	0.0300478	1858.68	88.0781	27.4565	2.30109	2.90436e-166	4.48433e-163	Null_Model_OpenChrom	human
Cistrome_ChIP	VCaP	BRD3	6668	142340	0.0468456	3358.89	120.554	27.4492	1.98518	3.55375e-166	5.48698e-163	Null_Model_OpenChrom	human
TxnFactorChIPV3	H1-hESC	TAF7	4393	142340	0.0308627	1880.16	91.588	27.4363	2.3365	5.05584e-166	7.80621e-163	Null_Model_OpenChrom	human
ReMap_ChIP	293t	PHF8	4099	142340	0.0287972	1819.22	83.3098	27.3651	2.25316	3.56858e-165	5.50989e-162	Null_Model_OpenChrom	human
Cistrome_ChIP	CUTLL1	NOTCH1	5098	142340	0.0358157	2439.36	97.2023	27.3516	2.08989	5.1682e-165	7.97971e-162	Null_Model_OpenChrom	human
Cistrome_ChIP	H9	EP300	8100	142340	0.056906	4551.94	129.963	27.3005	1.77946	2.09401e-164	3.23316e-161	Null_Model_OpenChrom	human
TxnFactorChIPV3	HEK293-T-REx	ZNF263	8769	142340	0.061606	5052.54	136.471	27.2327	1.73556	1.33287e-163	2.05795e-160	Null_Model_OpenChrom	human
ReMap_ChIP	huvec_vegf4hr	ETS1	8865	142340	0.0622805	5104.49	138.141	27.2221	1.7367	1.77622e-163	2.74248e-160	Null_Model_OpenChrom	human
ReMap_ChIP	helab2_p65kd_dmso	NR3C1	1650	142340	0.011592	469.009	43.3955	27.2146	3.51806	2.18343e-163	3.37122e-160	Null_Model_OpenChrom	human
Pazar_Chip	CD4+	HMGN1	20580	142340	0.144583	14411.3	226.811	27.1974	1.42804	3.48455e-163	5.38014e-160	Null_Model_OpenChrom	human
Cistrome_ChIP	EndothelialCell	ETS1	10371	142340	0.0728608	6224.03	152.66	27.1647	1.66628	8.4798e-163	1.30928e-159	Null_Model_OpenChrom	human
ReMap_ChIP	aplpz74_leukemia	ERG	10456	142340	0.0734579	6378.51	150.269	27.1347	1.63925	1.91893e-162	2.96283e-159	Null_Model_OpenChrom	human
TxnFactorChIPV3	HepG2	ELF1	5971	142340	0.0419489	3047.49	107.975	27.0758	1.95932	9.49417e-162	1.4659e-158	Null_Model_OpenChrom	human
Cistrome_ChIP	A549	ELF1	5144	142340	0.0361388	2483.08	98.3853	27.0459	2.07162	2.13177e-161	3.29145e-158	Null_Model_OpenChrom	human
ReMap_ChIP	huvec_vegf0hr	ETS1	5423	142340	0.0380989	2752.8	98.7471	27.0408	1.97	2.44896e-161	3.7812e-158	Null_Model_OpenChrom	human
TxnFactorChIPV3	K562	HMGN3	5896	142340	0.0414219	3010.29	106.801	27.0195	1.95862	4.36018e-161	6.73211e-158	Null_Model_OpenChrom	human
TxnFactorChIPV3	K562	EGR1	8405	142340	0.0590488	4895.5	129.897	27.0176	1.71688	4.59258e-161	7.09094e-158	Null_Model_OpenChrom	human
TxnFactorChIPV3	K562	CBX3	5385	142340	0.037832	2682.34	100.144	26.9877	2.00757	1.03126e-160	1.59226e-157	Null_Model_OpenChrom	human
Cistrome_ChIP	VCaP+JQ1	BRD4	3600	142340	0.0252916	1611.1	73.6967	26.9876	2.2345	1.03223e-160	1.59376e-157	Null_Model_OpenChrom	human
TxnFactorChIPV3	H1-hESC	ATF3	2180	142340	0.0153154	733.435	53.6488	26.9636	2.97232	1.97467e-160	3.0489e-157	Null_Model_OpenChrom	human
TxnFactorChIPV3	K562	E2F4	3640	142340	0.0255726	1588.53	76.1082	26.9547	2.29143	2.51482e-160	3.88288e-157	Null_Model_OpenChrom	human
TxnFactorChIPV3	H1-hESC	EGR1	3467	142340	0.0243572	1465.3	74.3168	26.9347	2.36607	4.31232e-160	6.65822e-157	Null_Model_OpenChrom	human
TxnFactorChIPV3	H1-hESC	MAX	4304	142340	0.0302375	2022.32	84.8051	26.9049	2.12824	9.61545e-160	1.48463e-156	Null_Model_OpenChrom	human
ReMap_ChIP	k562	GATA1	5002	142340	0.0351412	2457.74	94.6873	26.8702	2.03521	2.45168e-159	3.78539e-156	Null_Model_OpenChrom	human
TxnFactorChIPV3	HepG2	TAF1	6725	142340	0.047246	3773.59	109.996	26.8321	1.78212	6.83154e-159	1.05479e-155	Null_Model_OpenChrom	human
TxnFactorChIPV3	HeLa-S3	E2F1	5165	142340	0.0362864	2610.41	95.2258	26.8266	1.97861	7.90618e-159	1.22071e-155	Null_Model_OpenChrom	human
ReMap_ChIP	mm1s_jq1_500nm	MBD4	7302	142340	0.0512997	4177.17	116.548	26.8114	1.74807	1.18946e-158	1.83652e-155	Null_Model_OpenChrom	human
TxnFactorChIPV3	HepG2	ARID3A	4773	142340	0.0335324	2403.77	88.3991	26.8015	1.98563	1.55258e-158	2.39718e-155	Null_Model_OpenChrom	human
TxnFactorChIPV3	K562	BHLHE40	6294	142340	0.0442181	3386.29	108.531	26.7916	1.85867	2.02415e-158	3.12529e-155	Null_Model_OpenChrom	human
TxnFactorChIPV3	GM12878	EGR1	5191	142340	0.036469	2597.98	96.8231	26.781	1.99809	2.68685e-158	4.14849e-155	Null_Model_OpenChrom	human
TxnFactorChIPV3	MCF10A-Er-Src+4OHTAM_1uM_36hr	E2F4	5137	142340	0.0360896	2618.07	94.1932	26.7422	1.96213	7.60885e-158	1.17481e-154	Null_Model_OpenChrom	human
TxnFactorChIPV3	A549	MAX	4578	142340	0.0321624	2262.3	86.597	26.7411	2.0236	7.83813e-158	1.21021e-154	Null_Model_OpenChrom	human
Cistrome_ChIP	BJ	MYC	7133	142340	0.0501124	4025.91	116.199	26.7395	1.77178	8.187e-158	1.26407e-154	Null_Model_OpenChrom	human
TxnFactorChIPV3	SK-N-MC	POLR2A	10242	142340	0.0719545	6307.19	147.159	26.7385	1.62386	8.40826e-158	1.29824e-154	Null_Model_OpenChrom	human
ReMap_ChIP	cd4+tcell	BRD4	4495	142340	0.0315793	2207.62	85.6052	26.7201	2.03613	1.3742e-157	2.12177e-154	Null_Model_OpenChrom	human
Cistrome_ChIP	CD4+	POLR3A	1184	142340	0.00831811	295.103	33.2685	26.7189	4.01216	1.42087e-157	2.19382e-154	Null_Model_OpenChrom	human
Cistrome_ChIP	MM1.S	BRD4	9107	142340	0.0639806	5646.23	129.578	26.708	1.61293	1.89861e-157	2.93145e-154	Null_Model_OpenChrom	human
Cistrome_ChIP	IMR90	SPI1	38455	142340	0.270163	30752.2	288.629	26.6874	1.25048	3.29412e-157	5.08613e-154	Null_Model_OpenChrom	human
TxnFactorChIPV3	HeLa-S3	MAX	9474	142340	0.0665589	5725.43	140.534	26.6737	1.65472	4.75765e-157	7.34581e-154	Null_Model_OpenChrom	human
ReMap_ChIP	u87	MYC	3988	142340	0.0280174	1856.3	80.0326	26.6354	2.14836	1.32145e-156	2.04032e-153	Null_Model_OpenChrom	human
TxnFactorChIPV3	K562	ARID3A	2911	142340	0.020451	1235.35	62.9254	26.6291	2.35641	1.563e-156	2.41327e-153	Null_Model_OpenChrom	human
ReMap_ChIP	huvec_vegf1hr	ETS1	5227	142340	0.0367219	2693.49	95.184	26.617	1.9406	2.15921e-156	3.33381e-153	Null_Model_OpenChrom	human
Cistrome_ChIP	NT2-D1	YY1	3970	142340	0.027891	1902.93	77.7241	26.595	2.08626	3.88252e-156	5.99461e-153	Null_Model_OpenChrom	human
Cistrome_ChIP	LY1	BRD4	10171	142340	0.0714557	6306.02	145.389	26.5838	1.6129	5.23142e-156	8.07732e-153	Null_Model_OpenChrom	human
ReMap_ChIP	bt474	TFAP2C	14122	142340	0.0992132	9602.71	170.235	26.5473	1.47063	1.37921e-155	2.1295e-152	Null_Model_OpenChrom	human
TxnFactorChIPV3	K562	JUND	10403	142340	0.0730856	6527.95	145.978	26.5454	1.59361	1.45108e-155	2.24047e-152	Null_Model_OpenChrom	human
ReMap_ChIP	lcl_ramos	MYC	2141	142340	0.0150415	782.457	51.2289	26.5191	2.73625	2.92164e-155	4.51101e-152	Null_Model_OpenChrom	human
Pazar_Chip	IMR90_Senescent	RB1	3133	142340	0.0220107	1332.13	68.1029	26.4434	2.35187	2.17528e-154	3.35864e-151	Null_Model_OpenChrom	human
Cistrome_ChIP	A549	ETS1	5332	142340	0.0374596	2826.73	94.7422	26.443	1.88628	2.19663e-154	3.39159e-151	Null_Model_OpenChrom	human
Cistrome_ChIP	MCF-7	E2F1	9635	142340	0.06769	5895.35	141.445	26.4388	1.63434	2.45487e-154	3.79032e-151	Null_Model_OpenChrom	human
ReMap_ChIP	hela	E2F1	3561	142340	0.0250176	1634.84	72.8712	26.4324	2.1782	2.90529e-154	4.48577e-151	Null_Model_OpenChrom	human
ReMap_ChIP	amlpz12_leukemic	ERG	6119	142340	0.0429886	3327.58	105.802	26.3834	1.83887	1.06236e-153	1.64029e-150	Null_Model_OpenChrom	human
Misc_ChIP	IB4	EBNALP	2435	142340	0.0171069	955.541	56.0877	26.3776	2.54829	1.23913e-153	1.91322e-150	Null_Model_OpenChrom	EBV
TxnFactorChIPV3	K562	PHF8	7457	142340	0.0523886	4361.35	117.803	26.2783	1.70979	1.6994e-152	2.62388e-149	Null_Model_OpenChrom	human
TxnFactorChIPV3	K562	CCNT2	6390	142340	0.0448925	3611.49	105.812	26.2591	1.76935	2.81566e-152	4.34738e-149	Null_Model_OpenChrom	human
ReMap_ChIP	mm1s_dmso	MBD4	7602	142340	0.0534073	4442.13	120.436	26.237	1.71134	5.0267e-152	7.76123e-149	Null_Model_OpenChrom	human
Cistrome_ChIP	HEK293T	EP300	1900	142340	0.0133483	673.817	46.8617	26.166	2.81976	3.23952e-151	5.00182e-148	Null_Model_OpenChrom	human
TxnFactorChIPV3	MCF-7	E2F1	7016	142340	0.0492904	4106.44	111.278	26.1468	1.70853	5.36209e-151	8.27906e-148	Null_Model_OpenChrom	human
Cistrome_ChIP	U87	MYC	7340	142340	0.0515667	4339.12	114.852	26.1282	1.69159	8.73001e-151	1.34791e-147	Null_Model_OpenChrom	human
Cistrome_ChIP	LNCaP	ETV1	5403	142340	0.0379584	2941.47	94.383	26.0802	1.83684	3.05715e-150	4.72024e-147	Null_Model_OpenChrom	human
TxnFactorChIPV3	H1-hESC	RBBP5	7236	142340	0.050836	4279.97	113.353	26.0781	1.69067	3.23397e-150	4.99325e-147	Null_Model_OpenChrom	human
Cistrome_ChIP	NB4	MAX	3680	142340	0.0258536	1753.92	73.9099	26.0598	2.09815	5.21161e-150	8.04672e-147	Null_Model_OpenChrom	human
ReMap_ChIP	mdamb23_thiostrepton	FOXM1	3593	142340	0.0252424	1739.15	71.2181	26.0306	2.06595	1.11535e-149	1.7221e-146	Null_Model_OpenChrom	human
Cistrome_ChIP	LoVo	NFAT5	3456	142340	0.0242799	1671.12	68.606	26.0163	2.06807	1.61829e-149	2.49864e-146	Null_Model_OpenChrom	human
ReMap_ChIP	gist	ETV1	5911	142340	0.0415273	3323.45	99.4691	26.0136	1.77857	1.73932e-149	2.68551e-146	Null_Model_OpenChrom	human
TxnFactorChIPV3	H1-hESC	MYC	2760	142340	0.0193902	1193.38	60.425	25.9267	2.31276	1.66415e-148	2.56944e-145	Null_Model_OpenChrom	human
Cistrome_ChIP	K562	ETS1	2307	142340	0.0162077	951.675	52.3124	25.9083	2.42415	2.68579e-148	4.14686e-145	Null_Model_OpenChrom	human
TxnFactorChIPV3	K562	ETS1	3999	142340	0.0280947	2018.14	76.4732	25.9026	1.98152	3.11241e-148	4.80556e-145	Null_Model_OpenChrom	human
TxnFactorChIPV3	HepG2	GABPA	4080	142340	0.0286638	2026.79	79.3047	25.8902	2.01304	4.2928e-148	6.62809e-145	Null_Model_OpenChrom	human
Cistrome_ChIP	LoVo	RELA	5293	142340	0.0371856	2920.11	91.7417	25.8649	1.8126	8.28027e-148	1.27847e-144	Null_Model_OpenChrom	human
Cistrome_ChIP	GM12891	PAX5	4274	142340	0.0300267	2173.39	81.2154	25.8646	1.96651	8.32605e-148	1.28554e-144	Null_Model_OpenChrom	human
Cistrome_ChIP	MCF-7	PML	3469	142340	0.0243712	1643.36	70.7421	25.807	2.11092	3.70313e-147	5.71764e-144	Null_Model_OpenChrom	human
Cistrome_ChIP	H2171	MYC	14468	142340	0.101644	10250.2	163.728	25.7612	1.41149	1.20811e-146	1.86532e-143	Null_Model_OpenChrom	human
ReMap_ChIP	skno1_leukemic	RUNX1	11340	142340	0.0796684	7660.52	142.836	25.7601	1.48032	1.24364e-146	1.92018e-143	Null_Model_OpenChrom	human
Cistrome_ChIP	A549+IGG-RAB	MAX	1919	142340	0.0134818	726.98	46.3376	25.7247	2.63969	3.09371e-146	4.77668e-143	Null_Model_OpenChrom	human
TxnFactorChIPV3	GM12878	FOXM1	6465	142340	0.0454194	3754.86	105.433	25.7048	1.72177	5.16078e-146	7.96825e-143	Null_Model_OpenChrom	human
TxnFactorChIPV3	K562+IFNg6h	MYC	6645	142340	0.046684	3929.67	105.661	25.6984	1.69098	6.09144e-146	9.40518e-143	Null_Model_OpenChrom	human
TxnFactorChIPV3	GM12878	PAX5	7070	142340	0.0496698	4315.97	107.285	25.6703	1.6381	1.25616e-145	1.93951e-142	Null_Model_OpenChrom	human
TxnFactorChIPV3	SK-N-SH	REST	6961	142340	0.048904	4106.01	111.371	25.635	1.69532	3.1046e-145	4.7935e-142	Null_Model_OpenChrom	human
TxnFactorChIPV3	A549+EtOH_0.02pct	YY1	4219	142340	0.0296403	2167.38	80.0617	25.6255	1.94659	3.96401e-145	6.12042e-142	Null_Model_OpenChrom	human
TxnFactorChIPV3	SK-N-MC	FOXP2	4201	142340	0.0295138	2154.63	79.9418	25.5982	1.94975	7.98398e-145	1.23273e-141	Null_Model_OpenChrom	human
TxnFactorChIPV3	GM12878	NRF1	2333	142340	0.0163903	951.185	54.0318	25.5741	2.45273	1.48049e-144	2.28588e-141	Null_Model_OpenChrom	human
ReMap_ChIP	lcl_blue1	MYC	2220	142340	0.0155965	893.295	51.9543	25.536	2.48518	3.92844e-144	6.06551e-141	Null_Model_OpenChrom	human
ReMap_ChIP	saos	TP53	6652	142340	0.0467332	4014.59	103.477	25.4879	1.65696	1.34306e-143	2.07368e-140	Null_Model_OpenChrom	human
ReMap_ChIP	cutll	NOTCH1	2908	142340	0.02043	1355.47	60.9244	25.4829	2.14538	1.52456e-143	2.35392e-140	Null_Model_OpenChrom	human
TxnFactorChIPV3	K562	TBP	5666	142340	0.0398061	3227.96	95.6871	25.4793	1.75529	1.67058e-143	2.57938e-140	Null_Model_OpenChrom	human
TxnFactorChIPV3	HepG2	ZBTB7A	3239	142340	0.0227554	1538.02	66.8399	25.4485	2.10595	3.66423e-143	5.65758e-140	Null_Model_OpenChrom	human
Cistrome_ChIP	HepG2	MYC	2814	142340	0.0197696	1274.26	60.5102	25.446	2.20835	3.90378e-143	6.02743e-140	Null_Model_OpenChrom	human
Cistrome_ChIP	MR4	PML	3424	142340	0.0240551	1691.21	68.1318	25.4329	2.02459	5.45146e-143	8.41706e-140	Null_Model_OpenChrom	human
Cistrome_ChIP	LeukemicBlastCell	PML	3424	142340	0.0240551	1691.65	68.1381	25.424	2.02406	6.83928e-143	1.05599e-139	Null_Model_OpenChrom	human
Misc_ChIP	BCells	IRF3	941	142340	0.00661093	256.254	26.9346	25.4225	3.67214	7.10558e-143	1.0971e-139	Null_Model_OpenChrom	human
ReMap_ChIP	esc	POU5F1	1413	142340	0.00992694	477.067	36.8463	25.401	2.96185	1.22812e-142	1.89622e-139	Null_Model_OpenChrom	human
Cistrome_ChIP	A549	SP1	12611	142340	0.0885977	8725.89	153.117	25.3735	1.44524	2.472e-142	3.81677e-139	Null_Model_OpenChrom	human
ReMap_ChIP	jurkat	ETS1	4284	142340	0.030097	2298.4	78.3011	25.3585	1.86391	3.61661e-142	5.58404e-139	Null_Model_OpenChrom	human
TxnFactorChIPV3	HepG2	BHLHE40	4351	142340	0.0305677	2306.53	80.675	25.342	1.88638	5.49896e-142	8.4904e-139	Null_Model_OpenChrom	human
ReMap_ChIP	sclc_h128	MAX	5431	142340	0.0381551	3130.42	91.0468	25.2681	1.73491	3.58444e-141	5.53437e-138	Null_Model_OpenChrom	human
TxnFactorChIPV3	GM12878	BCLAF1	2514	142340	0.0176619	1137.3	54.5014	25.26	2.2105	4.40254e-141	6.79752e-138	Null_Model_OpenChrom	human
TxnFactorChIPV3	H1-hESC	USF1	5060	142340	0.0355487	2880.58	86.2936	25.2558	1.75659	4.8849e-141	7.54229e-138	Null_Model_OpenChrom	human
TxnFactorChIPV3	HCT-116	TCF7L2	6147	142340	0.0431853	3694.43	97.1513	25.2448	1.66385	6.45313e-141	9.96364e-138	Null_Model_OpenChrom	human
Cistrome_ChIP	GM12878	MYC	2149	142340	0.0150977	893.121	49.873	25.1816	2.40617	3.18994e-140	4.92526e-137	Null_Model_OpenChrom	human
TxnFactorChIPV3	H1-hESC	NRF1	1842	142340	0.0129408	762.662	42.8897	25.1654	2.41522	4.79131e-140	7.39778e-137	Null_Model_OpenChrom	human
Cistrome_ChIP	FB0167P	MYC	1779	142340	0.0124982	704.107	42.7322	25.1542	2.52661	6.36176e-140	9.82256e-137	Null_Model_OpenChrom	human
TxnFactorChIPV3	H1-hESC	MXI1	2844	142340	0.0199803	1320.25	60.6587	25.12	2.15414	1.50232e-139	2.31958e-136	Null_Model_OpenChrom	human
Cistrome_ChIP	K562	GABPA	4704	142340	0.0330476	2597.92	83.8595	25.1143	1.81068	1.73392e-139	2.67717e-136	Null_Model_OpenChrom	human
Cistrome_ChIP	NHEK	MYC	3243	142340	0.0227835	1584.46	66.0774	25.1	2.04675	2.48807e-139	3.84158e-136	Null_Model_OpenChrom	human
TxnFactorChIPV3	K562+IFNg6h	IRF1	4353	142340	0.0305817	2346.16	80.0648	25.0652	1.85537	5.96687e-139	9.21285e-136	Null_Model_OpenChrom	human
TxnFactorChIPV3	H1-hESC	HDAC2	2044	142340	0.01436	860.371	47.2472	25.0518	2.37572	8.33928e-139	1.28758e-135	Null_Model_OpenChrom	human
Cistrome_ChIP	LoVo	STAT2	2909	142340	0.020437	1394.34	60.477	25.0452	2.08629	9.84786e-139	1.52051e-135	Null_Model_OpenChrom	human
TxnFactorChIPV3	H1-hESC	TCF12	2467	142340	0.0173317	1121.85	53.811	24.9977	2.19905	3.23809e-138	4.99961e-135	Null_Model_OpenChrom	human
Pazar_Chip	HeLa	PHF8	7247	142340	0.0509133	4543.03	108.268	24.9747	1.59519	5.75078e-138	8.87921e-135	Null_Model_OpenChrom	human
Pazar_Chip	HeLa+G1	PHF8	3911	142340	0.0274765	2127.2	71.4887	24.9522	1.83856	1.0118e-137	1.56222e-134	Null_Model_OpenChrom	human
TxnFactorChIPV3	K562	TAF1	5717	142340	0.0401644	3400.46	92.951	24.9222	1.68124	2.13974e-137	3.30376e-134	Null_Model_OpenChrom	human
TxnFactorChIPV3	HeLa-S3	CHD2	6148	142340	0.0431924	3761.3	95.92	24.8822	1.63454	5.79686e-137	8.95035e-134	Null_Model_OpenChrom	human
Pazar_Chip	HeLa+G1S	PHF8	6608	142340	0.0464241	4084.71	101.487	24.8632	1.61774	9.31443e-137	1.43815e-133	Null_Model_OpenChrom	human
Cistrome_ChIP	LoVo	IRF1	8759	142340	0.0615358	5772.84	120.14	24.8556	1.51728	1.1258e-136	1.73824e-133	Null_Model_OpenChrom	human
ReMap_ChIP	skno1_leukemic	ERG	10154	142340	0.0713362	6953.46	128.956	24.8188	1.46028	2.81268e-136	4.34278e-133	Null_Model_OpenChrom	human
Pazar_Chip	hESC	SMAD4	1457	142340	0.0102361	518.699	37.8348	24.8	2.80895	4.48587e-136	6.92619e-133	Null_Model_OpenChrom	human
TxnFactorChIPV3	K562	ATF3	4223	142340	0.0296684	2259.83	79.3519	24.7401	1.86873	1.98111e-135	3.05884e-132	Null_Model_OpenChrom	human
Pazar_Chip	adipocyte	E2F4	2052	142340	0.0144162	861.835	48.1494	24.7182	2.38097	3.41067e-135	5.26607e-132	Null_Model_OpenChrom	human
TxnFactorChIPV3	SK-N-SH	TAF1	5475	142340	0.0384642	3290	88.4106	24.7143	1.66414	3.75522e-135	5.79806e-132	Null_Model_OpenChrom	human
Cistrome_ChIP	K562	SP2	2383	142340	0.0167416	1089.66	52.3995	24.6822	2.18691	8.30168e-135	1.28178e-131	Null_Model_OpenChrom	human
ReMap_ChIP	mcf7	TFAP2C	15148	142340	0.106421	11147.3	162.135	24.6749	1.35889	9.95712e-135	1.53738e-131	Null_Model_OpenChrom	human
TxnFactorChIPV3	HeLa-S3	MYC	4235	142340	0.0297527	2366.05	75.7911	24.6591	1.7899	1.46801e-134	2.26661e-131	Null_Model_OpenChrom	human
Cistrome_ChIP	GIST48	ETV1	4733	142340	0.0332514	2824.1	77.4649	24.6421	1.67593	2.23654e-134	3.45321e-131	Null_Model_OpenChrom	human
TxnFactorChIPV3	H1-hESC	CHD2	2694	142340	0.0189265	1289.2	57.0726	24.6142	2.08966	4.45526e-134	6.87893e-131	Null_Model_OpenChrom	human
Cistrome_ChIP	GM12878	STAT5A	13677	142340	0.0960868	9849.58	155.508	24.6123	1.38859	4.66026e-134	7.19544e-131	Null_Model_OpenChrom	human
TxnFactorChIPV3	GM12878	POU2F2	5746	142340	0.0403681	3463.1	92.7896	24.603	1.65921	5.8658e-134	9.05679e-131	Null_Model_OpenChrom	human
ReMap_ChIP	293T_gps2	NCOR1	1486	142340	0.0104398	578.746	36.9723	24.5387	2.56762	2.8524e-133	4.4041e-130	Null_Model_OpenChrom	human
TxnFactorChIPV3	MCF-7+estrogen	MYC	3637	142340	0.0255515	1945.71	68.9779	24.5193	1.86924	4.59695e-133	7.09768e-130	Null_Model_OpenChrom	human
TxnFactorChIPV3	HepG2	MAX	4583	142340	0.0321976	2592.15	81.2611	24.4994	1.76803	7.50304e-133	1.15847e-129	Null_Model_OpenChrom	human
Cistrome_ChIP	HeLa-S3	GABPA	2989	142340	0.020999	1520.55	60.0515	24.4532	1.96574	2.32656e-132	3.59221e-129	Null_Model_OpenChrom	human
TxnFactorChIPV3	HeLa-S3	GTF2F1	4064	142340	0.0285514	2237.88	74.7452	24.4313	1.816	3.9818e-132	6.14791e-129	Null_Model_OpenChrom	human
ReMap_ChIP	mm1s_dmso	BRD4	6821	142340	0.0479205	4343.96	101.409	24.4263	1.57022	4.49551e-132	6.94107e-129	Null_Model_OpenChrom	human
Misc_ChIP	LoVo	MED12	16063	142340	0.11285	11992	166.734	24.4161	1.33948	5.76913e-132	8.90753e-129	Null_Model_OpenChrom	human
TxnFactorChIPV3	H1-hESC	SP4	2752	142340	0.019334	1350.66	57.5079	24.3678	2.03752	1.87605e-131	2.89662e-128	Null_Model_OpenChrom	human
ReMap_ChIP	lcl_raji	MYC	2729	142340	0.0191724	1354.32	56.4297	24.3609	2.01503	2.2202e-131	3.42799e-128	Null_Model_OpenChrom	human
TxnFactorChIPV3	K562	KDM5B	5141	142340	0.0361177	3062.22	85.3331	24.3607	1.67885	2.23166e-131	3.44568e-128	Null_Model_OpenChrom	human
TxnFactorChIPV3	GM12878	RUNX3	12107	142340	0.0850569	8728.04	138.931	24.3212	1.38714	5.84522e-131	9.02502e-128	Null_Model_OpenChrom	human
TxnFactorChIPV3	H1-hESC	EP300	3046	142340	0.0213995	1529.93	62.3562	24.3131	1.99095	7.12036e-131	1.09938e-127	Null_Model_OpenChrom	human
TxnFactorChIPV3	HepG2	REST	4757	142340	0.03342	2785.89	81.0976	24.3054	1.70753	8.59167e-131	1.32655e-127	Null_Model_OpenChrom	human
ReMap_ChIP	mm1s_dmso	CDK9	6081	142340	0.0427217	3788.37	94.5932	24.2368	1.60518	4.56072e-130	7.04175e-127	Null_Model_OpenChrom	human
Cistrome_ChIP	NB4	MYC	2241	142340	0.015744	1031.06	49.9326	24.2314	2.17349	5.19191e-130	8.01631e-127	Null_Model_OpenChrom	human
ReMap_ChIP	keratinocyte_differentiated	TP63	12648	142340	0.0888577	9182.03	143.198	24.2041	1.37747	1.00754e-129	1.55564e-126	Null_Model_OpenChrom	human
Cistrome_ChIP	H9	TP53	2313	142340	0.0162498	1088.96	50.6103	24.1857	2.12405	1.5736e-129	2.42964e-126	Null_Model_OpenChrom	human
Cistrome_ChIP	Jurkat_E6-1	ETS1	4748	142340	0.0333568	2790.58	80.9697	24.1747	1.70144	2.05346e-129	3.17054e-126	Null_Model_OpenChrom	human
TxnFactorChIPV3	K562	SIN3AK20	4777	142340	0.0335605	2751.3	83.9271	24.1364	1.73627	5.18677e-129	8.00837e-126	Null_Model_OpenChrom	human
Cistrome_ChIP	HeLa-S3	NFYA	2151	142340	0.0151117	992.541	48.2083	24.0303	2.16716	6.70922e-128	1.0359e-124	Null_Model_OpenChrom	human
ReMap_ChIP	uae_leukemic	FLI1	8963	142340	0.0629689	6178.7	116.205	23.9603	1.45063	3.61242e-127	5.57758e-124	Null_Model_OpenChrom	human
Misc_ChIP	LoVo	MZF1	5387	142340	0.037846	3379.14	83.9097	23.9289	1.59419	7.67139e-127	1.18446e-123	Null_Model_OpenChrom	human
Cistrome_ChIP	MCF-7	GABPA	4669	142340	0.0328017	2746.07	80.3691	23.9262	1.70025	8.16994e-127	1.26144e-123	Null_Model_OpenChrom	human
Cistrome_ChIP	K562	ELK1	1438	142340	0.0101026	554.671	36.9227	23.9237	2.59253	8.67253e-127	1.33904e-123	Null_Model_OpenChrom	human
Cistrome_ChIP	Mononuclear_PBMC	STAT4	10217	142340	0.0717788	7134.94	128.915	23.9077	1.43197	1.27492e-126	1.96848e-123	Null_Model_OpenChrom	human
Cistrome_ChIP	KOPT-K1	BRD4	10587	142340	0.0743782	7544.23	127.285	23.9052	1.40332	1.3509e-126	2.08579e-123	Null_Model_OpenChrom	human
ReMap_ChIP	hela	DCP1A	8144	142340	0.0572151	5485.1	111.403	23.8673	1.48475	3.34887e-126	5.17066e-123	Null_Model_OpenChrom	human
ReMap_ChIP	esc	SMAD4	1988	142340	0.0139666	907.942	45.4486	23.7644	2.18957	3.90306e-125	6.02632e-122	Null_Model_OpenChrom	human
Cistrome_ChIP	KOPT-K1_Persisters	BRD4	9549	142340	0.0670859	6783.35	116.384	23.7631	1.40771	4.01988e-125	6.2067e-122	Null_Model_OpenChrom	human
TxnFactorChIPV3	K562	NRF1	1618	142340	0.0113671	688.334	39.1316	23.7574	2.3506	4.60525e-125	7.1105e-122	Null_Model_OpenChrom	human
Cistrome_ChIP	SKNO-1	FLI1	4407	142340	0.0309611	2594.39	76.3628	23.7369	1.69867	7.50842e-125	1.1593e-121	Null_Model_OpenChrom	human
ReMap_ChIP	plasma_jq1	MYC	1443	142340	0.0101377	590.409	35.9822	23.6948	2.44407	2.03973e-124	3.14934e-121	Null_Model_OpenChrom	human
Cistrome_ChIP	P493-6	MYC	2025	142340	0.0142265	951.29	45.3937	23.6533	2.12869	5.46066e-124	8.43125e-121	Null_Model_OpenChrom	human
TxnFactorChIPV3	GM12878	MAX	4839	142340	0.0339961	2876.13	83.0483	23.6353	1.68247	8.36432e-124	1.29145e-120	Null_Model_OpenChrom	human
Cistrome_ChIP	DND-41_Persisters	BRD4	6659	142340	0.0467824	4368.48	97.0735	23.5957	1.52433	2.13359e-123	3.29426e-120	Null_Model_OpenChrom	human
Cistrome_ChIP	HaematopoieticProgenitorCell	GABPA	2210	142340	0.0155262	1076.73	48.0313	23.5944	2.05251	2.20016e-123	3.39705e-120	Null_Model_OpenChrom	human
TxnFactorChIPV3	HepG2	RCOR1	2101	142340	0.0147604	1004.15	46.6096	23.5328	2.09232	9.42349e-123	1.45499e-119	Null_Model_OpenChrom	human
Cistrome_ChIP	A549	MYC	1169	142340	0.00821273	442.398	30.9165	23.5021	2.64242	1.94128e-122	2.99733e-119	Null_Model_OpenChrom	human
TxnFactorChIPV3	HeLa-S3	NFYA	2110	142340	0.0148237	1001.54	47.2083	23.4801	2.10675	3.25462e-122	5.02514e-119	Null_Model_OpenChrom	human
ReMap_ChIP	p493_6_1hr	MAX	2151	142340	0.0151117	1031.88	47.6626	23.48	2.08454	3.26688e-122	5.04407e-119	Null_Model_OpenChrom	human
TxnFactorChIPV3	GM12878	ZEB1	1805	142340	0.0126809	805.498	42.6788	23.4192	2.24085	1.36279e-121	2.10415e-118	Null_Model_OpenChrom	human
ReMap_ChIP	abl	AR	5994	142340	0.0421104	3870.21	90.809	23.3875	1.54875	2.86517e-121	4.42382e-118	Null_Model_OpenChrom	human
Cistrome_ChIP	LoVo	NFYC	2439	142340	0.017135	1249.98	50.8441	23.3855	1.95122	2.99886e-121	4.63024e-118	Null_Model_OpenChrom	human
Cistrome_ChIP	H2171	MAX	17013	142340	0.119524	13147.9	165.309	23.3813	1.29398	3.31134e-121	5.11271e-118	Null_Model_OpenChrom	human
TxnFactorChIPV3	A549+EtOH_0.02pct	ELF1	3106	142340	0.021821	1681.64	60.9785	23.3584	1.84701	5.66005e-121	8.73912e-118	Null_Model_OpenChrom	human
TxnFactorChIPV3	HeLa-S3	TAF1	5592	142340	0.0392862	3573	86.4487	23.3549	1.56507	6.15051e-121	9.49638e-118	Null_Model_OpenChrom	human
TxnFactorChIPV3	H1-hESC	USF2	2094	142340	0.0147113	1001.21	46.7965	23.352	2.09147	6.57876e-121	1.01576e-117	Null_Model_OpenChrom	human
TxnFactorChIPV3	K562	GABPA	4329	142340	0.0304131	2555.06	76.1275	23.3022	1.69428	2.10483e-120	3.24986e-117	Null_Model_OpenChrom	human
ReMap_ChIP	k562	PRAME	2721	142340	0.0191162	1471.07	53.6854	23.2825	1.84967	3.33645e-120	5.15148e-117	Null_Model_OpenChrom	human
Cistrome_ChIP	H1	SP1	7297	142340	0.0512646	4981.16	99.5194	23.2703	1.46492	4.43629e-120	6.84963e-117	Null_Model_OpenChrom	human
TxnFactorChIPV3	K562	RBBP5	5521	142340	0.0387874	3528.42	85.9062	23.1948	1.56472	2.567e-119	3.96345e-116	Null_Model_OpenChrom	human
Cistrome_ChIP	GM12878	PAX5	10573	142340	0.0742799	7719.84	123.072	23.1829	1.36959	3.38567e-119	5.22747e-116	Null_Model_OpenChrom	human
Cistrome_ChIP	CD4+	HDAC1	1016	142340	0.00713784	364.248	28.1189	23.1785	2.78931	3.75425e-119	5.79656e-116	Null_Model_OpenChrom	human
Misc_ChIP	LoVo	ATOH1	8434	142340	0.0592525	5923.42	108.508	23.1372	1.42384	9.77548e-119	1.50933e-115	Null_Model_OpenChrom	human
Misc_ChIP	LoVo	YY1	4547	142340	0.0319446	2790.46	76.151	23.0665	1.62948	5.02293e-118	7.7554e-115	Null_Model_OpenChrom	human
TxnFactorChIPV3	GM12878	MXI1	5544	142340	0.038949	3564.57	86.1157	22.9857	1.55531	3.23695e-117	4.99785e-114	Null_Model_OpenChrom	human
ReMap_ChIP	helab2_p65kd_ta_tnfa	RELA	1239	142340	0.00870451	493.242	32.4985	22.9475	2.51195	7.80339e-117	1.20484e-113	Null_Model_OpenChrom	human
TxnFactorChIPV3	H1-hESC	ATF2	2340	142340	0.0164395	1216.23	48.9944	22.9368	1.92398	9.98431e-117	1.54158e-113	Null_Model_OpenChrom	human
Cistrome_ChIP	HeLa-S3	ELK1	1353	142340	0.00950541	555.51	34.7865	22.9253	2.4356	1.30021e-116	2.00752e-113	Null_Model_OpenChrom	human
TxnFactorChIPV3	HeLa-S3	RCOR1	4588	142340	0.0322327	2852.88	75.7908	22.8936	1.6082	2.69312e-116	4.15817e-113	Null_Model_OpenChrom	human
ReMap_ChIP	sclc_h2171	MAX	9910	142340	0.069622	7232.84	116.968	22.888	1.37014	3.05696e-116	4.71995e-113	Null_Model_OpenChrom	human
Pazar_Chip	HeLa	P68	5160	142340	0.0362512	3263.97	82.8992	22.8715	1.5809	4.46145e-116	6.88848e-113	Null_Model_OpenChrom	human
Pazar_Chip	H1	Oct-4	1666	142340	0.0117044	766.229	39.3482	22.8669	2.17429	4.96371e-116	7.66397e-113	Null_Model_OpenChrom	human
Cistrome_ChIP	HepG2	GABPA	2380	142340	0.0167205	1218.45	50.8398	22.8473	1.9533	7.7796e-116	1.20117e-112	Null_Model_OpenChrom	human
ReMap_ChIP	hesc	YY1	2068	142340	0.0145286	1023.71	45.7626	22.8198	2.02011	1.45887e-115	2.2525e-112	Null_Model_OpenChrom	human
Cistrome_ChIP	A549	GABPA	5306	142340	0.0372769	3445.99	81.5591	22.8057	1.53976	2.01457e-115	3.11049e-112	Null_Model_OpenChrom	human
TxnFactorChIPV3	K562+IFNa6h	MYC	3855	142340	0.027083	2331.15	66.8524	22.7942	1.65369	2.61558e-115	4.03846e-112	Null_Model_OpenChrom	human
TxnFactorChIPV3	K562	THAP1	1375	142340	0.00965997	575.543	35.2071	22.7072	2.38905	1.90024e-114	2.93398e-111	Null_Model_OpenChrom	human
TxnFactorChIPV3	H1-hESC	GTF2F1	1619	142340	0.0113742	737.704	38.8129	22.7062	2.19465	1.94321e-114	3.00032e-111	Null_Model_OpenChrom	human
TxnFactorChIPV3	GM12878	RXRA	754	142340	0.00529718	240.512	22.6202	22.7004	3.13497	2.21834e-114	3.42512e-111	Null_Model_OpenChrom	human
TxnFactorChIPV3	PANC-1	SIN3AK20	3226	142340	0.022664	1833.39	61.4044	22.6793	1.75958	3.58526e-114	5.53564e-111	Null_Model_OpenChrom	human
TxnFactorChIPV3	GM12878	SRF	2277	142340	0.0159969	1169.5	48.8943	22.6508	1.94698	6.84529e-114	1.05691e-110	Null_Model_OpenChrom	human
TxnFactorChIPV3	HeLa-S3	E2F6	2183	142340	0.0153365	1113.29	47.2561	22.6365	1.96086	9.46803e-114	1.46186e-110	Null_Model_OpenChrom	human
TxnFactorChIPV3	HeLa-S3	ELK1	1921	142340	0.0134959	937.994	43.4257	22.6365	2.04799	9.47277e-114	1.4626e-110	Null_Model_OpenChrom	human
ReMap_ChIP	hek293	BRD2	12894	142340	0.0905859	9824.01	135.632	22.6347	1.3125	9.87565e-114	1.5248e-110	Null_Model_OpenChrom	human
TxnFactorChIPV3	HUVEC	MAX	3326	142340	0.0233666	1906.16	62.7972	22.6098	1.74486	1.73426e-113	2.6777e-110	Null_Model_OpenChrom	human
Misc_ChIP	LoVo	NFAT5	9632	142340	0.067669	7069.18	113.364	22.607	1.36253	1.84809e-113	2.85344e-110	Null_Model_OpenChrom	human
Pazar_Chip	MCF7+ETOH	TFAP2C	6927	142340	0.0486652	4780.55	94.9878	22.5971	1.449	2.31241e-113	3.57037e-110	Null_Model_OpenChrom	human
TxnFactorChIPV3	GM12878	TAF1	5118	142340	0.0359562	3292.34	80.8521	22.5803	1.55452	3.38585e-113	5.22775e-110	Null_Model_OpenChrom	human
Cistrome_ChIP	GM12878	PML	11830	142340	0.0831109	8918.25	129.254	22.5273	1.32649	1.12075e-112	1.73043e-109	Null_Model_OpenChrom	human
Misc_ChIP	LoVo	GMEB2	9755	142340	0.0685331	7058.02	119.734	22.5248	1.38212	1.18534e-112	1.83017e-109	Null_Model_OpenChrom	human
TxnFactorChIPV3	H1-hESC	SIN3AK20	3408	142340	0.0239427	1989.07	63.1446	22.4712	1.71337	3.97133e-112	6.13173e-109	Null_Model_OpenChrom	human
TxnFactorChIPV3	GM12878	WRNIP1	3836	142340	0.0269496	2288.27	68.8873	22.4676	1.67638	4.31008e-112	6.65476e-109	Null_Model_OpenChrom	human
ReMap_ChIP	plasma	MBD4	4496	142340	0.0315863	2806.63	75.2033	22.464	1.60192	4.67089e-112	7.21186e-109	Null_Model_OpenChrom	human
Cistrome_ChIP	SK-N-SH	YY1	3798	142340	0.0266826	2300.72	66.8663	22.3922	1.65079	2.34677e-111	3.62342e-108	Null_Model_OpenChrom	human
Cistrome_ChIP	HeLa-S3	ELK4	2119	142340	0.0148869	1076.61	46.5598	22.3882	1.96821	2.56653e-111	3.96272e-108	Null_Model_OpenChrom	human
ReMap_ChIP	h2171	MYC	4956	142340	0.034818	3180.49	79.3191	22.3845	1.55825	2.78881e-111	4.30592e-108	Null_Model_OpenChrom	human
Pazar_Chip	IMR90_Quiescent	RB1	1404	142340	0.00986371	634.804	34.4229	22.3455	2.21171	6.68145e-111	1.03162e-107	Null_Model_OpenChrom	human
TxnFactorChIPV3	GM12892	TAF1	3865	142340	0.0271533	2375.13	66.7475	22.321	1.62728	1.15596e-110	1.78481e-107	Null_Model_OpenChrom	human
Misc_ChIP	LoVo	ASCL2	7461	142340	0.0524167	5213.17	100.706	22.3207	1.43118	1.16413e-110	1.79742e-107	Null_Model_OpenChrom	human
TxnFactorChIPV3	GM12878	GABPA	2589	142340	0.0181888	1398.02	53.3907	22.3069	1.85191	1.58318e-110	2.44443e-107	Null_Model_OpenChrom	human
TxnFactorChIPV3	GM12878	ELK1	2096	142340	0.0147253	1077.08	45.6867	22.3023	1.946	1.7538e-110	2.70787e-107	Null_Model_OpenChrom	human
ReMap_ChIP	uae_leukemic_5hrzinc	FLI1	9650	142340	0.0677954	6991.24	119.432	22.2618	1.3803	4.33936e-110	6.69998e-107	Null_Model_OpenChrom	human
TxnFactorChIPV3	SK-N-SH_RA	USF1	4291	142340	0.0301461	2692.84	71.9706	22.2057	1.59348	1.51272e-109	2.33564e-106	Null_Model_OpenChrom	human
ReMap_ChIP	helab2_p65kd_ta_tnfa	NR3C1	3917	142340	0.0275186	2434.13	66.7802	22.2052	1.6092	1.53012e-109	2.36251e-106	Null_Model_OpenChrom	human
TxnFactorChIPV3	GM12878	TCF3	3943	142340	0.0277013	2386.29	70.1226	22.1998	1.65235	1.72491e-109	2.66326e-106	Null_Model_OpenChrom	human
Cistrome_ChIP	GM12878	ETS1	2309	142340	0.0162217	1213.71	49.3614	22.1891	1.90243	2.18732e-109	3.37722e-106	Null_Model_OpenChrom	human
ReMap_ChIP	keratinocyte_progenitor	TP63	7610	142340	0.0534635	5369.03	101.256	22.1318	1.41739	7.80972e-109	1.20582e-105	Null_Model_OpenChrom	human
TxnFactorChIPV3	K562	HDAC1	4137	142340	0.0290642	2543.85	72.0034	22.1261	1.62628	8.85918e-109	1.36786e-105	Null_Model_OpenChrom	human
TxnFactorChIPV3	H1-hESC	BRCA1	922	142340	0.00647745	344.668	26.1054	22.1154	2.67504	1.12405e-108	1.73553e-105	Null_Model_OpenChrom	human
TxnFactorChIPV3	SK-N-SH	SIN3AK20	5120	142340	0.0359702	3338.35	80.6169	22.1003	1.53369	1.57153e-108	2.42645e-105	Null_Model_OpenChrom	human
ReMap_ChIP	mm1s_dmso	MYC	4440	142340	0.0311929	2879.83	70.7358	22.0563	1.54176	4.15293e-108	6.41212e-105	Null_Model_OpenChrom	human
TxnFactorChIPV3	HepG2	SIN3AK20	5402	142340	0.0379514	3612.13	81.2107	22.0398	1.49552	5.98387e-108	9.23909e-105	Null_Model_OpenChrom	human
TxnFactorChIPV3	T-47D+DMSO_0.02pct	FOXA1	6543	142340	0.0459674	4485.45	93.3786	22.0345	1.45872	6.73147e-108	1.03934e-104	Null_Model_OpenChrom	human
Pazar_Chip	IMR90_shRbSenescent	P130	5520	142340	0.0387804	3666.17	84.2252	22.0104	1.50566	1.14524e-107	1.76825e-104	Null_Model_OpenChrom	human
ReMap_ChIP	mm1s_jq1_50nm	BRD4	2069	142340	0.0145356	1081.77	44.872	22.0009	1.9126	1.41014e-107	2.17726e-104	Null_Model_OpenChrom	human
TxnFactorChIPV3	HeLa-S3	ZKSCAN1	1446	142340	0.0101588	672.354	35.2439	21.9512	2.15065	4.21634e-107	6.51003e-104	Null_Model_OpenChrom	human
ReMap_ChIP	hpc	GABPA	1617	142340	0.0113601	762.519	38.9721	21.9254	2.1206	7.43328e-107	1.1477e-103	Null_Model_OpenChrom	human
Misc_ChIP	LoVo	DBP	5634	142340	0.0395813	3816.26	82.9299	21.919	1.47632	8.54972e-107	1.32008e-103	Null_Model_OpenChrom	human
ReMap_ChIP	skno1_leukemic	FLI1	8166	142340	0.0573697	5971.75	100.401	21.8549	1.36744	3.49287e-106	5.39299e-103	Null_Model_OpenChrom	human
TxnFactorChIPV3	K562	SAP30	3521	142340	0.0247365	2110.37	64.5775	21.844	1.66843	4.43403e-106	6.84614e-103	Null_Model_OpenChrom	human
TxnFactorChIPV3	GM12878	TCF12	4704	142340	0.0330476	3086.04	74.1349	21.8245	1.52428	6.7931e-106	1.04885e-102	Null_Model_OpenChrom	human
TxnFactorChIPV3	A549+DEX_100nM	USF1	3119	142340	0.0219123	1836.07	58.8274	21.8084	1.69874	9.66054e-106	1.49159e-102	Null_Model_OpenChrom	human
Pazar_Chip	Jurkat	ETS1	6316	142340	0.0443726	4356.76	90.0679	21.753	1.4497	3.23755e-105	4.99878e-102	Null_Model_OpenChrom	human
TxnFactorChIPV3	HeLa-S3	NRF1	1143	142340	0.00803007	491.261	29.9692	21.747	2.32667	3.68986e-105	5.69715e-102	Null_Model_OpenChrom	human
TxnFactorChIPV3	HeLa-S3	MXI1	3995	142340	0.0280666	2509.9	68.3219	21.7369	1.5917	4.59846e-105	7.10003e-102	Null_Model_OpenChrom	human
Pazar_Chip	IMR90_Growing	RB1	1451	142340	0.0101939	668.692	36.1181	21.6597	2.16991	2.46148e-104	3.80052e-101	Null_Model_OpenChrom	human
TxnFactorChIPV3	GM12878	SIN3A	3882	142340	0.0272727	2471.05	65.5214	21.5343	1.57099	3.71844e-103	5.74128e-100	Null_Model_OpenChrom	human
ReMap_ChIP	t47d_doxy48hrs	ELF5	1056	142340	0.00741886	431.78	28.9922	21.5306	2.44569	4.02105e-103	6.2085e-100	Null_Model_OpenChrom	human
TxnFactorChIPV3	K562+IFNa30	MYC	2956	142340	0.0207672	1770.15	55.0936	21.5243	1.66991	4.61492e-103	7.12543e-100	Null_Model_OpenChrom	human
ReMap_ChIP	cutll	RBPJ	1424	142340	0.0100042	669.449	35.1469	21.4685	2.12712	1.53388e-102	2.36832e-99	Null_Model_OpenChrom	human
TxnFactorChIPV3	PANC-1	REST	1773	142340	0.0124561	887.326	41.2548	21.4684	1.99814	1.53797e-102	2.37463e-99	Null_Model_OpenChrom	human
Cistrome_ChIP	T_Lymphocyte	ETS1	2089	142340	0.0146761	1122.86	45.1972	21.3762	1.86043	1.11297e-101	1.71843e-98	Null_Model_OpenChrom	human
Cistrome_ChIP	K562	PML	7119	142340	0.0500141	5086.82	95.1716	21.3528	1.3995	1.83807e-101	2.83799e-98	Null_Model_OpenChrom	human
Misc_ChIP	LoVo	H3K4me3	9489	142340	0.0666643	7183.8	107.974	21.3496	1.32089	1.9658e-101	3.0352e-98	Null_Model_OpenChrom	human
TxnFactorChIPV3	A549+DEX_100nM	POLR2A	10894	142340	0.0765351	8386.45	117.52	21.3372	1.299	2.56497e-101	3.96032e-98	Null_Model_OpenChrom	human
TxnFactorChIPV3	HeLa-S3	GABPA	2538	142340	0.0178305	1426.7	52.0895	21.3345	1.77893	2.71825e-101	4.19698e-98	Null_Model_OpenChrom	human
TxnFactorChIPV3	MCF-7+serum_stimulated_media	POLR2A	9144	142340	0.0642406	6796.27	110.122	21.3193	1.34544	3.7577e-101	5.80188e-98	Null_Model_OpenChrom	human
Pazar_Chip	IMR90_Quiescent	P130	4006	142340	0.0281439	2572.55	67.3051	21.2978	1.55721	5.94447e-101	9.17826e-98	Null_Model_OpenChrom	human
TxnFactorChIPV3	HeLa-S3	SMARCB1	3255	142340	0.0228678	1955.45	61.0633	21.282	1.66458	8.33765e-101	1.28733e-97	Null_Model_OpenChrom	human
Cistrome_ChIP	SK-N-SH	GABPA	2548	142340	0.0179008	1457.42	51.2632	21.2741	1.74829	9.86697e-101	1.52346e-97	Null_Model_OpenChrom	human
TxnFactorChIPV3	HepG2	CHD2	1953	142340	0.0137207	1031.63	43.3622	21.2483	1.89313	1.70977e-100	2.63989e-97	Null_Model_OpenChrom	human
TxnFactorChIPV3	HeLa-S3	BRCA1	2330	142340	0.0163693	1302.16	48.4637	21.2084	1.78933	3.99496e-100	6.16822e-97	Null_Model_OpenChrom	human
Pazar_Chip	IMR90_Senescent	P130	4513	142340	0.0317058	3034.94	69.7584	21.1883	1.48701	6.12779e-100	9.46131e-97	Null_Model_OpenChrom	human
TxnFactorChIPV3	IMR90	POLR2A	8288	142340	0.0582268	6052.62	105.527	21.1831	1.36932	6.8425e-100	1.05648e-96	Null_Model_OpenChrom	human
TxnFactorChIPV3	H1-hESC	CEBPB	2758	142340	0.0193761	1596.64	54.8476	21.1742	1.72737	8.2556e-100	1.27466e-96	Null_Model_OpenChrom	human
Misc_ChIP	LoVo	MYB	2571	142340	0.0180624	1459.32	52.5066	21.1722	1.76178	8.62237e-100	1.33129e-96	Null_Model_OpenChrom	human
Pazar_Chip	IMR90_Senescent	RB2	4006	142340	0.0281439	2571.96	67.7808	21.157	1.55757	1.19023e-99	1.83772e-96	Null_Model_OpenChrom	human
TxnFactorChIPV3	GM12891	TAF1	4298	142340	0.0301953	2800.64	70.7977	21.1498	1.53465	1.38536e-99	2.139e-96	Null_Model_OpenChrom	human
ReMap_ChIP	mcf7	KLF4	1989	142340	0.0139736	1064.61	43.7692	21.1197	1.86829	2.62219e-99	4.04867e-96	Null_Model_OpenChrom	human
Cistrome_ChIP	EWS502	FLI1	16938	142340	0.118997	13706.2	153.229	21.0911	1.23579	4.79941e-99	7.41029e-96	Null_Model_OpenChrom	human
TxnFactorChIPV3	K562	CHD2	2470	142340	0.0173528	1390.61	51.2741	21.0513	1.77619	1.11278e-98	1.71813e-95	Null_Model_OpenChrom	human
TxnFactorChIPV3	A549+EtOH_0.02pct	POLR2A	10799	142340	0.0758676	8340.19	116.837	21.0447	1.29482	1.27759e-98	1.97261e-95	Null_Model_OpenChrom	human
TxnFactorChIPV3	HEK293	POLR2A	6910	142340	0.0485457	5001.85	91.0986	20.9459	1.38149	1.02151e-97	1.57721e-94	Null_Model_OpenChrom	human
TxnFactorChIPV3	A549	POLR2A	9143	142340	0.0642335	6907.3	106.795	20.9345	1.32367	1.29896e-97	2.00559e-94	Null_Model_OpenChrom	human
TxnFactorChIPV3	A549+EtOH_0.02pct	USF1	3324	142340	0.0233525	2082.69	59.3083	20.9297	1.59601	1.43545e-97	2.21634e-94	Null_Model_OpenChrom	human
Cistrome_ChIP	U87	BRD4	13975	142340	0.0981804	11179.7	133.764	20.8976	1.25004	2.81738e-97	4.35003e-94	Null_Model_OpenChrom	human
TxnFactorChIPV3	GM12878	ETS1	1553	142340	0.0109105	799.388	36.0833	20.8853	1.94274	3.64027e-97	5.62058e-94	Null_Model_OpenChrom	human
Misc_ChIP	LoVo	HINFP	10918	142340	0.0767037	8472.22	117.128	20.8812	1.28868	3.96977e-97	6.12932e-94	Null_Model_OpenChrom	human
ReMap_ChIP	mcf7	NR2F2	11104	142340	0.0780104	8628.42	118.962	20.8099	1.28691	1.76206e-96	2.72062e-93	Null_Model_OpenChrom	human
TxnFactorChIPV3	GM12878	E2F4	1425	142340	0.0100112	698.671	34.9162	20.8021	2.03959	2.07254e-96	3.20001e-93	Null_Model_OpenChrom	human
TxnFactorChIPV3	MCF-7+serum_starved_media	POLR2A	8713	142340	0.0612126	6526.85	105.16	20.7887	1.33495	2.73877e-96	4.22865e-93	Null_Model_OpenChrom	human
Cistrome_ChIP	SK-N-SH	ELF1	1689	142340	0.011866	878.107	39.0312	20.7755	1.92346	3.60314e-96	5.56325e-93	Null_Model_OpenChrom	human
TxnFactorChIPV3	K562	BCLAF1	1536	142340	0.0107911	783.373	36.2587	20.7572	1.96075	5.28103e-96	8.15391e-93	Null_Model_OpenChrom	human
Misc_ChIP	LoVo	KLF5	11387	142340	0.0799986	8842.81	122.804	20.7174	1.28771	1.20622e-95	1.86241e-92	Null_Model_OpenChrom	human
Cistrome_ChIP	FB8470	MYC	734	142340	0.00515667	279.189	21.9865	20.6859	2.62905	2.31992e-95	3.58195e-92	Null_Model_OpenChrom	human
TxnFactorChIPV3	Gliobla	POLR2A	8597	142340	0.0603976	6442.11	104.443	20.6321	1.3345	7.06404e-95	1.09069e-91	Null_Model_OpenChrom	human
Cistrome_ChIP	EmbryonicStemCell	YY1	1284	142340	0.00902065	610.801	32.7305	20.568	2.10216	2.65798e-94	4.10392e-91	Null_Model_OpenChrom	human
ReMap_ChIP	imr90h	GTF2B	1623	142340	0.0114023	849.078	37.7109	20.5225	1.91149	6.77942e-94	1.04674e-90	Null_Model_OpenChrom	human
TxnFactorChIPV3	K562	ELK1	1222	142340	0.00858508	576.217	31.4761	20.5166	2.12073	7.65091e-94	1.1813e-90	Null_Model_OpenChrom	human
TxnFactorChIPV3	HepG2	TBP	4097	142340	0.0287832	2707.05	67.7769	20.5078	1.51346	9.17369e-94	1.41642e-90	Null_Model_OpenChrom	human
TxnFactorChIPV3	ECC-1+DMSO_0.02pct	POLR2A	9239	142340	0.064908	7060.66	106.415	20.4701	1.30852	1.98744e-93	3.06861e-90	Null_Model_OpenChrom	human
TxnFactorChIPV3	K562	HDAC2	2756	142340	0.0193621	1693.13	51.9383	20.4641	1.62776	2.2473e-93	3.46983e-90	Null_Model_OpenChrom	human
ReMap_ChIP	erythroid	ATRX	944	142340	0.00663201	397.408	26.7109	20.4633	2.37539	2.28778e-93	3.53233e-90	Null_Model_OpenChrom	human
Misc_ChIP	LoVo	MED1	9132	142340	0.0641562	7028.2	103.213	20.3831	1.29934	1.18051e-92	1.82271e-89	Null_Model_OpenChrom	human
TxnFactorChIPV3	HeLa-S3	ELK4	2154	142340	0.0151328	1220.81	45.8297	20.3621	1.7644	1.81287e-92	2.79907e-89	Null_Model_OpenChrom	human
Cistrome_ChIP	HCT-116	ELF1	1288	142340	0.00904876	612.133	33.2676	20.3161	2.10412	4.6348e-92	7.15613e-89	Null_Model_OpenChrom	human
TxnFactorChIPV3	NT2-D1	YY1	1812	142340	0.0127301	1005.68	39.7796	20.2696	1.80176	1.19226e-91	1.84085e-88	Null_Model_OpenChrom	human
TxnFactorChIPV3	HeLa-S3+IFNg30	STAT1	3976	142340	0.0279331	2619.01	67.0784	20.2299	1.51813	2.66915e-91	4.12116e-88	Null_Model_OpenChrom	human
TxnFactorChIPV3	GM12878	CHD2	4250	142340	0.0298581	2874.37	68.2398	20.1588	1.47858	1.1274e-90	1.7407e-87	Null_Model_OpenChrom	human
TxnFactorChIPV3	GM12878	USF1	2525	142340	0.0177392	1515.22	50.1255	20.145	1.66642	1.4889e-90	2.29886e-87	Null_Model_OpenChrom	human
Cistrome_ChIP	LoVo	MYC	6587	142340	0.0462765	4794.96	89.1104	20.1104	1.37374	2.99235e-90	4.62018e-87	Null_Model_OpenChrom	human
TxnFactorChIPV3	K562	SP2	1118	142340	0.00785443	507.284	30.46	20.0498	2.20389	1.01411e-89	1.56579e-86	Null_Model_OpenChrom	human
TxnFactorChIPV3	K562	SRF	1275	142340	0.00895743	627.941	32.3628	19.9939	2.03045	3.11154e-89	4.80421e-86	Null_Model_OpenChrom	human
TxnFactorChIPV3	H1-hESC	SRF	1223	142340	0.0085921	595.77	31.3804	19.9879	2.0528	3.50728e-89	5.41524e-86	Null_Model_OpenChrom	human
TxnFactorChIPV3	HepG2	MYC	1876	142340	0.0131797	1034.53	42.1503	19.9636	1.81339	5.70668e-89	8.81111e-86	Null_Model_OpenChrom	human
Cistrome_ChIP	HeLa	GABPA	1062	142340	0.00746101	492.031	28.5763	19.9455	2.1584	8.19983e-89	1.26605e-85	Null_Model_OpenChrom	human
TxnFactorChIPV3	MCF-7+serum_starved_media	MYC	2022	142340	0.0142054	1168.15	42.9072	19.8998	1.73094	2.04195e-88	3.15276e-85	Null_Model_OpenChrom	human
TxnFactorChIPV3	A549+EtOH_0.02pct	TAF1	3588	142340	0.0252073	2346.41	62.43	19.8877	1.52914	2.60174e-88	4.01708e-85	Null_Model_OpenChrom	human
Misc_ChIP	LoVo	NPAT	2418	142340	0.0169875	1469.49	47.7339	19.8707	1.64546	3.64937e-88	5.63463e-85	Null_Model_OpenChrom	human
ReMap_ChIP	vcap_dht18hr	AR	6137	142340	0.0431151	4415.61	86.6317	19.8703	1.38984	3.68107e-88	5.68357e-85	Null_Model_OpenChrom	human
Pazar_Chip	megakaryocytes	RUNX1	2216	142340	0.0155684	1289.83	46.6212	19.8658	1.71805	4.02361e-88	6.21245e-85	Null_Model_OpenChrom	human
TxnFactorChIPV3	HepG2	ATF3	1117	142340	0.00784741	531.303	29.5509	19.82	2.10238	1.00103e-87	1.5456e-84	Null_Model_OpenChrom	human
TxnFactorChIPV3	HCT-116	ZBTB33	1501	142340	0.0105452	810.003	34.961	19.7648	1.85308	2.9937e-87	4.62228e-84	Null_Model_OpenChrom	human
Cistrome_ChIP	LoVo	YY1	1151	142340	0.00808627	551.087	30.4035	19.7317	2.0886	5.76337e-87	8.89865e-84	Null_Model_OpenChrom	human
Cistrome_ChIP	T98G	EP300	8253	142340	0.0579809	6391	94.4336	19.7176	1.29135	7.61272e-87	1.1754e-83	Null_Model_OpenChrom	human
TxnFactorChIPV3	HepG2	NRF1	754	142340	0.00529718	317.734	22.1316	19.7123	2.37305	8.45303e-87	1.30515e-83	Null_Model_OpenChrom	human
Cistrome_ChIP	CD34+	POLR2A	8016	142340	0.0563159	6098.1	97.3377	19.7036	1.31451	1.00472e-86	1.55128e-83	Null_Model_OpenChrom	human
Misc_ChIP	GM12878	p52	5648	142340	0.0396796	4082.1	79.4904	19.6992	1.3836	1.09567e-86	1.69172e-83	Null_Model_OpenChrom	human
Cistrome_ChIP	CD4+	HDAC6	2019	142340	0.0141843	1189.89	42.2121	19.6416	1.6968	3.41357e-86	5.27055e-83	Null_Model_OpenChrom	human
Cistrome_ChIP	K562	NFYB	2866	142340	0.0201349	1835.86	52.5598	19.5994	1.56112	7.82515e-86	1.2082e-82	Null_Model_OpenChrom	human
TxnFactorChIPV3	K562	GTF2F1	1441	142340	0.0101236	759.171	34.8723	19.5522	1.89812	1.97745e-85	3.05318e-82	Null_Model_OpenChrom	human
Misc_ChIP	GM12878	cRel	3950	142340	0.0277505	2685.79	64.9299	19.4704	1.4707	9.78811e-85	1.51128e-81	Null_Model_OpenChrom	human
Cistrome_ChIP	GM12878	GABPA	1518	142340	0.0106646	791.743	37.3101	19.4654	1.91729	1.07882e-84	1.6657e-81	Null_Model_OpenChrom	human
TxnFactorChIPV3	H1-hESC	CTBP2	2750	142340	0.0193199	1676.84	55.2013	19.4409	1.63999	1.73967e-84	2.68605e-81	Null_Model_OpenChrom	human
TxnFactorChIPV3	H1-hESC	POLR2A	9614	142340	0.0675425	7607.42	103.248	19.4347	1.26377	1.96437e-84	3.03299e-81	Null_Model_OpenChrom	human
Cistrome_ChIP	GM10861	VDR	3041	142340	0.0213643	1951.42	56.1479	19.4055	1.55835	3.46979e-84	5.35736e-81	Null_Model_OpenChrom	human
ReMap_ChIP	mcf7_tam	E2F4	1087	142340	0.00763664	531.241	28.7031	19.3624	2.04615	8.01939e-84	1.23819e-80	Null_Model_OpenChrom	human
Misc_ChIP	LoVo	MYBL2	4041	142340	0.0283898	2783.63	65.0345	19.3338	1.4517	1.39475e-83	2.1535e-80	Null_Model_OpenChrom	human
Cistrome_ChIP	LoVo	ETS2	5842	142340	0.0410426	4271.12	81.3334	19.3141	1.36779	2.04277e-83	3.15403e-80	Null_Model_OpenChrom	human
Pazar_Chip	HCT116	SP1	10847	142340	0.0762049	8513.72	120.965	19.2889	1.27406	3.32925e-83	5.14037e-80	Null_Model_OpenChrom	human
Pazar_Chip	SKOV-3	EVI1	5576	142340	0.0391738	4053.31	79.7519	19.0928	1.37567	1.44859e-81	2.23663e-78	Null_Model_OpenChrom	human
TxnFactorChIPV3	HCT-116	POLR2A	11057	142340	0.0776802	8855.73	115.511	19.0568	1.24857	2.88308e-81	4.45147e-78	Null_Model_OpenChrom	human
TxnFactorChIPV3	GM12878	MYC	1864	142340	0.0130954	1089.67	40.6931	19.0286	1.71061	4.94297e-81	7.63195e-78	Null_Model_OpenChrom	human
Cistrome_ChIP	DND-41	BRD4	2406	142340	0.0169032	1509.2	47.3016	18.9593	1.59423	1.85182e-80	2.85921e-77	Null_Model_OpenChrom	human
ReMap_ChIP	mcf7_e2	TFAP2C	7726	142340	0.0542785	5933.85	94.6	18.9445	1.30202	2.45142e-80	3.785e-77	Null_Model_OpenChrom	human
TxnFactorChIPV3	HepG2	RFX5	1726	142340	0.0121259	990.394	38.841	18.9389	1.74274	2.72468e-80	4.20691e-77	Null_Model_OpenChrom	human
TxnFactorChIPV3	GM12878	SIX5	1512	142340	0.0106225	827.37	36.1623	18.9322	1.82748	3.09826e-80	4.78371e-77	Null_Model_OpenChrom	human
Misc_ChIP	GM12878	p50	5593	142340	0.0392932	4058.77	81.061	18.9268	1.378	3.42853e-80	5.29365e-77	Null_Model_OpenChrom	human
Cistrome_ChIP	H1	SP2	868	142340	0.00609808	395.79	24.9643	18.9154	2.19308	4.25796e-80	6.57429e-77	Null_Model_OpenChrom	human
Misc_ChIP	LoVo	MEF2C	2279	142340	0.016011	1400.13	46.5491	18.8805	1.62771	8.2439e-80	1.27286e-76	Null_Model_OpenChrom	human
TxnFactorChIPV3	GM15510+TNFa	RELA	3739	142340	0.0262681	2580.94	61.3578	18.8738	1.4487	9.35982e-80	1.44516e-76	Null_Model_OpenChrom	human
TxnFactorChIPV3	K562	SETDB1	1124	142340	0.00789659	562.42	29.7823	18.8562	1.99851	1.30782e-79	2.01927e-76	Null_Model_OpenChrom	human
ReMap_ChIP	mcf7_etoh	TFAP2C	7162	142340	0.0503161	5508.29	87.9606	18.8005	1.30022	3.73732e-79	5.77042e-76	Null_Model_OpenChrom	human
Pazar_Chip	hESC	POU5F1	2795	142340	0.0196361	1811.14	52.499	18.7406	1.54323	1.1548e-78	1.78302e-75	Null_Model_OpenChrom	human
ReMap_ChIP	t47d_ru486	NR3C3	8875	142340	0.0623507	6963.73	101.997	18.7386	1.27446	1.19866e-78	1.85073e-75	Null_Model_OpenChrom	human
Pazar_Chip	Caco-2_differentiated	HNF4	21355	142340	0.150028	18295.3	163.493	18.7145	1.16724	1.8858e-78	2.91167e-75	Null_Model_OpenChrom	human
Cistrome_ChIP	CD4+	CREBBP	1565	142340	0.0109948	870.286	37.1689	18.6907	1.79826	2.94415e-78	4.54577e-75	Null_Model_OpenChrom	human
ReMap_ChIP	wm853_2	SETDB1	712	142340	0.00500211	315.068	21.2858	18.6477	2.25983	6.58668e-78	1.01698e-74	Null_Model_OpenChrom	human
TxnFactorChIPV3	ProgFib	POLR2A	7987	142340	0.0561121	6152.54	98.7327	18.5801	1.29816	2.32861e-77	3.59538e-74	Null_Model_OpenChrom	human
ReMap_ChIP	huvec_tnf	RELA	4390	142340	0.0308416	3092.48	69.9249	18.5559	1.41957	3.6551e-77	5.64348e-74	Null_Model_OpenChrom	human
TxnFactorChIPV3	H1-hESC	SP2	884	142340	0.00621048	418.03	25.1208	18.5492	2.11468	4.13924e-77	6.39098e-74	Null_Model_OpenChrom	human
Pazar_Chip	Caco-2_proliferating	HNF4	22410	142340	0.15744	19495.2	157.14	18.5488	1.14951	4.16986e-77	6.43826e-74	Null_Model_OpenChrom	human
ReMap_ChIP	vcap_dht2hr	AR	4200	142340	0.0295068	2954.84	67.2846	18.5059	1.4214	9.25223e-77	1.42854e-73	Null_Model_OpenChrom	human
ReMap_ChIP	lclgm10861_calcitriol	VDR	3994	142340	0.0280596	2835.77	62.7048	18.4712	1.40844	1.75956e-76	2.71676e-73	Null_Model_OpenChrom	human
TxnFactorChIPV3	HepG2	CEBPD	2651	142340	0.0186244	1707.8	51.066	18.4703	1.55229	1.79023e-76	2.76411e-73	Null_Model_OpenChrom	human
Cistrome_ChIP	VCaP	GABPA	1264	142340	0.00888015	675.711	31.8588	18.4655	1.87062	1.95767e-76	3.02264e-73	Null_Model_OpenChrom	human
TxnFactorChIPV3	HeLa-S3	TFAP2C	5950	142340	0.0418013	4462.78	80.7612	18.4151	1.33325	4.97134e-76	7.67576e-73	Null_Model_OpenChrom	human
TxnFactorChIPV3	K562	SIX5	1304	142340	0.00916116	701.733	32.7336	18.399	1.85826	6.68511e-76	1.03218e-72	Null_Model_OpenChrom	human
Cistrome_ChIP	EndothelialCell	FLI1	13882	142340	0.097527	11507.7	129.221	18.3738	1.20632	1.06528e-75	1.64479e-72	Null_Model_OpenChrom	human
TxnFactorChIPV3	H1-hESC	SP1	3467	142340	0.0243572	2368.54	59.9578	18.3206	1.46377	2.83433e-75	4.3762e-72	Null_Model_OpenChrom	human
TxnFactorChIPV3	A549	BHLHE40	1071	142340	0.00752424	549.148	28.5188	18.2985	1.95029	4.25241e-75	6.56572e-72	Null_Model_OpenChrom	human
Cistrome_ChIP	HepG2	SP2	821	142340	0.00576788	382.986	23.9441	18.2932	2.14368	4.68798e-75	7.23824e-72	Null_Model_OpenChrom	human
Misc_ChIP	LoVo	GLI3	6966	142340	0.0489392	5357.38	87.9729	18.2854	1.30026	5.40809e-75	8.35009e-72	Null_Model_OpenChrom	human
Cistrome_ChIP	HEK293	ELK4	796	142340	0.00559224	374.097	23.1073	18.2585	2.12779	8.86055e-75	1.36807e-71	Null_Model_OpenChrom	human
TxnFactorChIPV3	K562	MXI1	2247	142340	0.0157861	1403.22	46.4488	18.1657	1.60131	4.8199e-74	7.44192e-71	Null_Model_OpenChrom	human
TxnFactorChIPV3	PFSK-1	TAF1	2311	142340	0.0162358	1485.69	45.4631	18.1533	1.5555	6.04199e-74	9.32883e-71	Null_Model_OpenChrom	human
Misc_ChIP	LoVo	CASP8AP2	3642	142340	0.0255866	2544.92	60.5103	18.1305	1.43109	9.15979e-74	1.41427e-70	Null_Model_OpenChrom	human
Misc_ChIP	LoVo	NIPBL	13462	142340	0.0945764	11279.1	120.498	18.1156	1.19353	1.19987e-73	1.8526e-70	Null_Model_OpenChrom	human
Cistrome_ChIP	GM15510	RELA	2154	142340	0.0151328	1336.7	45.1808	18.0895	1.61143	1.92712e-73	2.97547e-70	Null_Model_OpenChrom	human
ReMap_ChIP	flp143ha_4hr	ZNF143	1968	142340	0.0138261	1227.31	41.1524	17.9986	1.6035	9.9838e-73	1.5415e-69	Null_Model_OpenChrom	human
Cistrome_ChIP	CD4+	INO80	1311	142340	0.00921034	722.091	32.8936	17.9035	1.81556	5.54124e-72	8.55567e-69	Null_Model_OpenChrom	human
TxnFactorChIPV3	GM12878	SP1	4163	142340	0.0292469	2975.06	66.373	17.8979	1.3993	6.12113e-72	9.45103e-69	Null_Model_OpenChrom	human
TxnFactorChIPV3	HeLa-S3	E2F4	1113	142340	0.00781931	600.169	28.7813	17.8182	1.85448	2.55194e-71	3.9402e-68	Null_Model_OpenChrom	human
TxnFactorChIPV3	MCF-7	POLR2A	7547	142340	0.0530209	5886.83	93.1827	17.8162	1.28201	2.64384e-71	4.08209e-68	Null_Model_OpenChrom	human
Misc_ChIP	PBMC	STAT4	3429	142340	0.0240902	2413.75	57.1322	17.7702	1.42061	6.01736e-71	9.2908e-68	Null_Model_OpenChrom	human
TxnFactorChIPV3	GM12878	BHLHE40	3290	142340	0.0231137	2258.96	58.5558	17.6078	1.45642	1.07316e-69	1.65695e-66	Null_Model_OpenChrom	human
Cistrome_ChIP	HEK293	BRD2	15438	142340	0.108459	13146.7	130.436	17.5663	1.17428	2.23198e-69	3.44617e-66	Null_Model_OpenChrom	human
Cistrome_ChIP	L428-PAX5	PAX5	3378	142340	0.0237319	2389.93	56.4086	17.5162	1.41343	5.38764e-69	8.31852e-66	Null_Model_OpenChrom	human
TxnFactorChIPV3	NB4	POLR2A	7669	142340	0.053878	6069.1	91.7791	17.432	1.26361	2.35734e-68	3.63973e-65	Null_Model_OpenChrom	human
ReMap_ChIP	huvec	RELA	855	142340	0.00600674	427.129	24.5968	17.3954	2.00174	4.46771e-68	6.89814e-65	Null_Model_OpenChrom	human
ReMap_ChIP	plasma_dmso	CDK9	3228	142340	0.0226781	2250.34	56.2074	17.3939	1.43445	4.59217e-68	7.09031e-65	Null_Model_OpenChrom	human
TxnFactorChIPV3	K562	SP1	1991	142340	0.0139876	1243.86	43.0397	17.3592	1.60066	8.39577e-68	1.29631e-64	Null_Model_OpenChrom	human
ReMap_ChIP	helab2_grkd_ta_tnfa	NR3C1	1116	142340	0.00784038	602.886	29.6026	17.3334	1.8511	1.31567e-67	2.03139e-64	Null_Model_OpenChrom	human
TxnFactorChIPV3	HepG2	USF1	3723	142340	0.0261557	2702.33	59.4317	17.1739	1.3777	2.08194e-66	3.21451e-63	Null_Model_OpenChrom	human
TxnFactorChIPV3	K562	USF1	3293	142340	0.0231347	2322.32	56.6278	17.1414	1.41798	3.64312e-66	5.62498e-63	Null_Model_OpenChrom	human
TxnFactorChIPV3	HUVEC	MYC	1807	142340	0.012695	1129.26	39.7308	17.0584	1.60017	1.51315e-65	2.33631e-62	Null_Model_OpenChrom	human
Misc_ChIP	LoVo	FEV	2731	142340	0.0191865	1905.79	48.3892	17.0535	1.433	1.64471e-65	2.53943e-62	Null_Model_OpenChrom	human
TxnFactorChIPV3	GM15510	POLR2A	8274	142340	0.0581284	6646.61	95.5943	17.0239	1.24484	2.73061e-65	4.21606e-62	Null_Model_OpenChrom	human
Cistrome_ChIP	SKNO-1	EP300	1586	142340	0.0111423	964.051	36.7998	16.9009	1.64514	2.21596e-64	3.42144e-61	Null_Model_OpenChrom	human
TxnFactorChIPV3	GM18526	POLR2A	7799	142340	0.0547913	6266.7	90.7004	16.8941	1.24451	2.48816e-64	3.84172e-61	Null_Model_OpenChrom	human
ReMap_ChIP	mm1s_jq1_5nm	BRD4	2022	142340	0.0142054	1291.08	43.2762	16.8896	1.56613	2.68244e-64	4.14169e-61	Null_Model_OpenChrom	human
ReMap_ChIP	h2171	MAX	9989	142340	0.070177	8191.74	106.427	16.8872	1.2194	2.79468e-64	4.31498e-61	Null_Model_OpenChrom	human
Cistrome_ChIP	U87	MAX	20581	142340	0.14459	18046	150.344	16.8612	1.14047	4.34394e-64	6.70705e-61	Null_Model_OpenChrom	human
TxnFactorChIPV3	MCF10A-Er-Src+4OHTAM_1uM_36hr	POLR2A	8283	142340	0.0581917	6682.93	95.0939	16.8262	1.23943	7.84599e-64	1.21142e-60	Null_Model_OpenChrom	human
TxnFactorChIPV3	GM10847	POLR2A	5707	142340	0.0400941	4478.47	73.1016	16.8058	1.27432	1.10634e-63	1.70819e-60	Null_Model_OpenChrom	human
TxnFactorChIPV3	Raji	POLR2A	7812	142340	0.0548827	6284.51	90.948	16.7952	1.24306	1.32204e-63	2.04123e-60	Null_Model_OpenChrom	human
TxnFactorChIPV3	K562+IFNg30	IRF1	2677	142340	0.0188071	1799.32	52.3344	16.7707	1.48779	1.99866e-63	3.08593e-60	Null_Model_OpenChrom	human
TxnFactorChIPV3	K562+IFNg6h	POLR2A	7453	142340	0.0523605	5966.92	88.7544	16.7437	1.24905	3.14813e-63	4.86072e-60	Null_Model_OpenChrom	human
TxnFactorChIPV3	K562	CHD1	3073	142340	0.0215892	2149.81	55.2629	16.7054	1.42943	5.98378e-63	9.23896e-60	Null_Model_OpenChrom	human
Misc_ChIP	LoVo	USF2	1803	142340	0.0126669	1125.45	40.6782	16.6564	1.60203	1.35875e-62	2.09791e-59	Null_Model_OpenChrom	human
TxnFactorChIPV3	K562	TEAD4	5221	142340	0.0366798	3984.06	74.3962	16.6263	1.31047	2.24613e-62	3.46802e-59	Null_Model_OpenChrom	human
Misc_ChIP	LoVo	UBTF	3332	142340	0.0234087	2373.83	57.7777	16.5837	1.40364	4.57207e-62	7.05927e-59	Null_Model_OpenChrom	human
Cistrome_ChIP	ECC-1	EP300	6278	142340	0.0441057	4961.79	79.4189	16.573	1.26527	5.45933e-62	8.42921e-59	Null_Model_OpenChrom	human
ReMap_ChIP	hek293	BRD3	5565	142340	0.0390965	4289	77.0922	16.5516	1.2975	7.79484e-62	1.20352e-58	Null_Model_OpenChrom	human
TxnFactorChIPV3	GM12878	RFX5	1290	142340	0.00906281	748.978	32.6912	16.5495	1.72235	8.07714e-62	1.24711e-58	Null_Model_OpenChrom	human
Misc_ChIP	LoVo	HBP1	5673	142340	0.0398553	4381.24	78.2351	16.5112	1.29484	1.52257e-61	2.35085e-58	Null_Model_OpenChrom	human
ReMap_ChIP	cutll	ZNF143	1661	142340	0.0116692	1044.9	37.4797	16.4383	1.58963	5.08796e-61	7.8558e-58	Null_Model_OpenChrom	human
TxnFactorChIPV3	GM18951	POLR2A	8783	142340	0.0617044	7199.02	96.4793	16.4179	1.22003	7.12461e-61	1.10004e-57	Null_Model_OpenChrom	human
TxnFactorChIPV3	K562	ZBTB33	935	142340	0.00656878	506.615	26.1665	16.3715	1.84558	1.52853e-60	2.36005e-57	Null_Model_OpenChrom	human
TxnFactorChIPV3	GM12891	POU2F2	3190	142340	0.0224111	2304.05	54.2129	16.3421	1.38452	2.47748e-60	3.82522e-57	Null_Model_OpenChrom	human
Cistrome_ChIP	MM1.S	BRD2	1021	142340	0.00717297	581.303	27.0011	16.2844	1.7564	6.3662e-60	9.82942e-57	Null_Model_OpenChrom	human
TxnFactorChIPV3	HeLa-S3	TFAP2A	4494	142340	0.0315723	3424.5	65.7355	16.2697	1.31231	8.09726e-60	1.25022e-56	Null_Model_OpenChrom	human
TxnFactorChIPV3	MCF10A-Er-Src+EtOH_0.01pct	MYC	7330	142340	0.0514964	5925.21	86.3798	16.263	1.23709	9.0376e-60	1.39541e-56	Null_Model_OpenChrom	human
TxnFactorChIPV3	A549+DEX_100nM	NR3C1	3533	142340	0.0248209	2567.33	59.4702	16.2378	1.37614	1.36219e-59	2.10323e-56	Null_Model_OpenChrom	human
TxnFactorChIPV3	GM12878	PML	4450	142340	0.0312632	3366.34	66.8979	16.1988	1.32191	2.57145e-59	3.97032e-56	Null_Model_OpenChrom	human
Pazar_Chip	Jurkat	CREBBP	6619	142340	0.0465013	5257.37	84.28	16.156	1.25899	5.15153e-59	7.95396e-56	Null_Model_OpenChrom	human
TxnFactorChIPV3	A549+EtOH_0.02pct	GABPA	3287	142340	0.0230926	2355.87	57.6412	16.154	1.39524	5.32374e-59	8.21986e-56	Null_Model_OpenChrom	human
ReMap_ChIP	k562	GATA2	1190	142340	0.00836026	687.77	31.121	16.138	1.73023	6.8989e-59	1.06519e-55	Null_Model_OpenChrom	human
Cistrome_ChIP	HL-60	GABPA	1259	142340	0.00884502	753.39	31.4122	16.096	1.67111	1.36091e-58	2.10125e-55	Null_Model_OpenChrom	human
TxnFactorChIPV3	HeLa-S3	USF2	2517	142340	0.017683	1763.06	46.8793	16.0825	1.42763	1.69255e-58	2.6133e-55	Null_Model_OpenChrom	human
ReMap_ChIP	cd36_shbrg1	GATA1	3535	142340	0.0248349	2596.15	58.5741	16.0285	1.36163	4.04254e-58	6.24169e-55	Null_Model_OpenChrom	human
TxnFactorChIPV3	K562	TBL1XR1	2555	142340	0.01795	1771.52	48.9093	16.0191	1.44227	4.69878e-58	7.25492e-55	Null_Model_OpenChrom	human
Misc_ChIP	LoVo	GATA4	3172	142340	0.0222847	2304.76	54.1835	16.0056	1.37628	5.8361e-58	9.01094e-55	Null_Model_OpenChrom	human
Misc_ChIP	PBMC	IRF5	2536	142340	0.0178165	1766.86	48.1333	15.9793	1.43531	8.90111e-58	1.37433e-54	Null_Model_OpenChrom	human
TxnFactorChIPV3	HepG2+forskolin	POLR2A	8812	142340	0.0619081	7197.75	101.065	15.9725	1.22427	9.93853e-58	1.53451e-54	Null_Model_OpenChrom	human
ReMap_ChIP	flp76_4hr	ZNF76	1763	142340	0.0123858	1142.31	38.9863	15.9206	1.54336	2.27956e-57	3.51965e-54	Null_Model_OpenChrom	human
Misc_ChIP	LoVo	NEUROG3	1322	142340	0.00928762	815.946	32.1149	15.7576	1.62021	3.04418e-56	4.70022e-53	Null_Model_OpenChrom	human
Misc_ChIP	LoVo	ZBED4	4493	142340	0.0315653	3465.99	65.7987	15.6084	1.29631	3.19142e-55	4.92755e-52	Null_Model_OpenChrom	human
TxnFactorChIPV3	GM12878	USF2	1974	142340	0.0138682	1342.29	40.5785	15.5677	1.47062	6.03581e-55	9.3193e-52	Null_Model_OpenChrom	human
Cistrome_ChIP	HaematopoieticProgenitorCell	FLI1	4257	142340	0.0299073	3245.21	65.036	15.5574	1.31178	7.09246e-55	1.09508e-51	Null_Model_OpenChrom	human
Pazar_Chip	Caco-2_differentiated	CDX2	22929	142340	0.161086	20627.3	149.443	15.4016	1.11158	7.98658e-54	1.23313e-50	Null_Model_OpenChrom	human
TxnFactorChIPV3	K562+IFNg30	POLR2A	7227	142340	0.0507728	5892.07	86.7296	15.3918	1.22656	9.28884e-54	1.4342e-50	Null_Model_OpenChrom	human
ReMap_ChIP	hela_s3	ZNF143	1153	142340	0.00810032	669.528	31.5015	15.3476	1.72211	1.8378e-53	2.83757e-50	Null_Model_OpenChrom	human
ReMap_ChIP	k562	NFYB	3453	142340	0.0242588	2587.02	56.8428	15.2346	1.33474	1.04202e-52	1.60888e-49	Null_Model_OpenChrom	human
Cistrome_ChIP	LoVo	NFYA	1400	142340	0.0098356	891.364	33.4273	15.2162	1.57063	1.3808e-52	2.13196e-49	Null_Model_OpenChrom	human
Cistrome_ChIP	Cardiomyocyte	EP300	2684	142340	0.0188563	1934.6	49.2769	15.2079	1.38736	1.5677e-52	2.42052e-49	Null_Model_OpenChrom	human
Misc_ChIP	LoVo	GLI2	5050	142340	0.0354784	3984.7	70.1236	15.1917	1.26735	2.00582e-52	3.09699e-49	Null_Model_OpenChrom	human
ReMap_ChIP	tall_rpmi8402	TCF12	8716	142340	0.0612337	7305.57	93.0057	15.165	1.19306	3.01518e-52	4.65543e-49	Null_Model_OpenChrom	human
Cistrome_ChIP	A549	EP300	6174	142340	0.043375	5035.13	75.1086	15.163	1.22619	3.10774e-52	4.79835e-49	Null_Model_OpenChrom	human
TxnFactorChIPV3	HepG2	NR2C2	926	142340	0.00650555	534.125	25.9319	15.1117	1.73368	6.77961e-52	1.04677e-48	Null_Model_OpenChrom	human
Misc_ChIP	LoVo	JUN	4867	142340	0.0341928	3828.92	68.7433	15.1009	1.27112	7.98959e-52	1.23359e-48	Null_Model_OpenChrom	human
Misc_ChIP	LoVo	SOX2	7471	142340	0.052487	6137.62	88.4012	15.0832	1.21725	1.04392e-51	1.6118e-48	Null_Model_OpenChrom	human
TxnFactorChIPV3	HeLa-S3	POLR2A	10266	142340	0.0721231	8745.93	100.874	15.069	1.1738	1.2956e-51	2.0004e-48	Null_Model_OpenChrom	human
Misc_ChIP	LoVo	HOXC6	7132	142340	0.0501054	5894.74	82.6756	14.9653	1.20989	6.18978e-51	9.55702e-48	Null_Model_OpenChrom	human
ReMap_ChIP	lclgm12892	NFKB1	3824	142340	0.0268653	2925.4	60.3322	14.8942	1.30717	1.79774e-50	2.77572e-47	Null_Model_OpenChrom	human
TxnFactorChIPV3	K562+IFNa30	POLR2A	6502	142340	0.0456794	5257.96	83.6209	14.8772	1.2366	2.31721e-50	3.57778e-47	Null_Model_OpenChrom	human
TxnFactorChIPV3	A549+EtOH_0.02pct	ETS1	1711	142340	0.0120205	1140.95	38.318	14.8768	1.49962	2.33302e-50	3.60219e-47	Null_Model_OpenChrom	human
Cistrome_ChIP	GM19099	RELA	3358	142340	0.0235914	2519.55	56.7866	14.7649	1.33278	1.2342e-49	1.90561e-46	Null_Model_OpenChrom	human
Misc_ChIP	LoVo	NKX2.2	10232	142340	0.0718842	8751.56	100.773	14.6908	1.16916	3.69355e-49	5.70284e-46	Null_Model_OpenChrom	human
Cistrome_ChIP	HeLa	MYC	791	142340	0.00555712	440.274	23.9437	14.6479	1.79661	6.94435e-49	1.07221e-45	Null_Model_OpenChrom	human
Cistrome_ChIP	Monocyte_CD14+	STAT1	5503	142340	0.038661	4424.34	73.6578	14.6442	1.2438	7.33577e-49	1.13264e-45	Null_Model_OpenChrom	human
Cistrome_ChIP	CD14+	STAT1	5503	142340	0.038661	4423.8	73.8594	14.6115	1.24395	1.18541e-48	1.83028e-45	Null_Model_OpenChrom	human
Cistrome_ChIP	GP5d	MYC	1560	142340	0.0109597	1032.95	36.3309	14.507	1.51024	5.47144e-48	8.4479e-45	Null_Model_OpenChrom	human
ReMap_ChIP	ls180_125	CTNNB1	1142	142340	0.00802304	706.508	30.0367	14.4986	1.6164	6.18013e-48	9.54211e-45	Null_Model_OpenChrom	human
TxnFactorChIPV3	H1-hESC	REST	2086	142340	0.0146551	1473.23	42.82	14.3104	1.41594	9.41485e-47	1.45365e-43	Null_Model_OpenChrom	human
TxnFactorChIPV3	GM12878	REST	1656	142340	0.0116341	1123.43	37.2437	14.2995	1.47405	1.10149e-46	1.7007e-43	Null_Model_OpenChrom	human
Misc_ChIP	GM12878	BRD4	1954	142340	0.0137277	1375.55	40.4712	14.2929	1.42052	1.21193e-46	1.87122e-43	Null_Model_OpenChrom	human
ReMap_ChIP	kasumi1_leukemic	RUNX1T1	1772	142340	0.0124491	1215.48	38.9573	14.2855	1.45787	1.34703e-46	2.07982e-43	Null_Model_OpenChrom	human
TxnFactorChIPV3	GM19193	POLR2A	8479	142340	0.0595686	7161.28	92.4516	14.253	1.18401	2.14612e-46	3.31361e-43	Null_Model_OpenChrom	human
ReMap_ChIP	ls180_veh	CTNNB1	1178	142340	0.00827596	747.545	30.2093	14.2491	1.57582	2.27092e-46	3.5063e-43	Null_Model_OpenChrom	human
Cistrome_ChIP	T47D	EP300	3904	142340	0.0274273	3034	61.0977	14.2394	1.28675	2.60772e-46	4.02632e-43	Null_Model_OpenChrom	human
TxnFactorChIPV3	GM19099	POLR2A	8562	142340	0.0601517	7251.74	92.0968	14.227	1.18068	3.11634e-46	4.81164e-43	Null_Model_OpenChrom	human
TxnFactorChIPV3	K562	PML	3777	142340	0.0265351	2924.7	60.0099	14.2026	1.29141	4.41327e-46	6.81409e-43	Null_Model_OpenChrom	human
TxnFactorChIPV3	HepG2	SRF	1049	142340	0.00736968	645.465	28.45	14.184	1.62519	5.75461e-46	8.88512e-43	Null_Model_OpenChrom	human
TxnFactorChIPV3	PBDE	POLR2A	6512	142340	0.0457496	5357.54	81.4261	14.178	1.21548	6.26494e-46	9.67306e-43	Null_Model_OpenChrom	human
Misc_ChIP	LoVo	RARG	6318	142340	0.0443867	5166.31	81.5878	14.1159	1.22292	1.5151e-45	2.33932e-42	Null_Model_OpenChrom	human
Cistrome_ChIP	H929	IRF4	1659	142340	0.0116552	1122.82	38.0787	14.0809	1.47754	2.48691e-45	3.83979e-42	Null_Model_OpenChrom	human
TxnFactorChIPV3	A549+EtOH_0.02pct	SIX5	1390	142340	0.00976535	909.594	34.2312	14.0341	1.52815	4.81856e-45	7.43985e-42	Null_Model_OpenChrom	human
TxnFactorChIPV3	K562+IFNa6h	POLR2A	6250	142340	0.043909	5132.51	80.2116	13.9317	1.21773	2.03223e-44	3.13776e-41	Null_Model_OpenChrom	human
TxnFactorChIPV3	HEK293	KAP1	3841	142340	0.0269847	3015.63	59.4183	13.8909	1.2737	3.59569e-44	5.55175e-41	Null_Model_OpenChrom	human
Misc_ChIP	LoVo	MYC	13013	142340	0.0914219	11438.3	113.454	13.8796	1.13767	4.21143e-44	6.50245e-41	Null_Model_OpenChrom	human
TxnFactorChIPV3	MCF10A-Er-Src+EtOH_0.01pct	POLR2A	8341	142340	0.0585991	7091.16	90.0643	13.8772	1.17625	4.35368e-44	6.72208e-41	Null_Model_OpenChrom	human
TxnFactorChIPV3	H1-hESC	MAFK	1525	142340	0.0107138	1013.04	37.0664	13.8121	1.50538	1.07766e-43	1.66391e-40	Null_Model_OpenChrom	human
Misc_ChIP	LoVo	ZNF250	6902	142340	0.0484895	5768.2	82.2756	13.7805	1.19656	1.66894e-43	2.57684e-40	Null_Model_OpenChrom	human
TxnFactorChIPV3	GM18951+TNFa	RELA	3284	142340	0.0230715	2519.66	55.6859	13.7258	1.30335	3.55507e-43	5.48902e-40	Null_Model_OpenChrom	human
TxnFactorChIPV3	HeLa-S3	TBP	4345	142340	0.0305255	3487.93	62.4807	13.7173	1.24572	3.99853e-43	6.17374e-40	Null_Model_OpenChrom	human
Misc_ChIP	LoVo	HES4	5602	142340	0.0393565	4592.27	73.6668	13.7067	1.21988	4.62616e-43	7.14278e-40	Null_Model_OpenChrom	human
Misc_ChIP	LoVo	ZNF706	3573	142340	0.0251019	2750.01	60.2719	13.6545	1.29927	9.48356e-43	1.46426e-39	Null_Model_OpenChrom	human
Misc_ChIP	LoVo	LYL1	9258	142340	0.0650415	7895.84	100.145	13.6018	1.17252	1.95323e-42	3.01579e-39	Null_Model_OpenChrom	human
TxnFactorChIPV3	K562	GTF2B	836	142340	0.00587326	502.886	24.5715	13.5569	1.6624	3.6052e-42	5.56643e-39	Null_Model_OpenChrom	human
TxnFactorChIPV3	H1-hESC	CHD1	2704	142340	0.0189968	2036.47	49.2613	13.5507	1.32778	3.92409e-42	6.05879e-39	Null_Model_OpenChrom	human
TxnFactorChIPV3	K562	TAF7	925	142340	0.00649852	580.878	25.6087	13.4377	1.59242	1.81735e-41	2.80599e-38	Null_Model_OpenChrom	human
TxnFactorChIPV3	GM18505	POLR2A	8392	142340	0.0589574	7146.66	92.9491	13.3981	1.17425	3.10203e-41	4.78954e-38	Null_Model_OpenChrom	human
Misc_ChIP	LoVo	BARHL1	6762	142340	0.047506	5716.2	78.2677	13.3619	1.18295	5.04908e-41	7.79577e-38	Null_Model_OpenChrom	human
TxnFactorChIPV3	HepG2+insulin	SREBP1	788	142340	0.00553604	469.716	24.0029	13.2602	1.67761	1.96938e-40	3.04073e-37	Null_Model_OpenChrom	human
Misc_ChIP	LoVo	RFX2	2500	142340	0.0175636	1894.95	46.2161	13.0918	1.3193	1.83492e-39	2.83311e-36	Null_Model_OpenChrom	human
TxnFactorChIPV3	GM12878	IRF4	3118	142340	0.0219053	2445.21	52.3755	12.8455	1.27515	4.55977e-38	7.04029e-35	Null_Model_OpenChrom	human
ReMap_ChIP	esc	SMAD2+3	1503	142340	0.0105592	1056	35.0128	12.7666	1.42329	1.25923e-37	1.94425e-34	Null_Model_OpenChrom	human
TxnFactorChIPV3	PANC-1	POLR2A	4540	142340	0.0318955	3707.13	65.2403	12.7662	1.22467	1.26581e-37	1.95441e-34	Null_Model_OpenChrom	human
TxnFactorChIPV3	HepG2	USF2	1215	142340	0.0085359	827.426	30.4625	12.723	1.46841	2.20318e-37	3.40171e-34	Null_Model_OpenChrom	human
Misc_ChIP	LoVo	RBCK1	3577	142340	0.02513	2849.89	57.3914	12.6693	1.25514	4.37505e-37	6.75508e-34	Null_Model_OpenChrom	human
ReMap_ChIP	germ_bcell	BCOR	1065	142340	0.00748209	706.433	28.3727	12.6377	1.50757	6.53713e-37	1.00933e-33	Null_Model_OpenChrom	human
Pazar_Chip	H1	SOX2	986	142340	0.00692708	639.438	27.4391	12.6302	1.54198	7.19352e-37	1.11068e-33	Null_Model_OpenChrom	human
ReMap_ChIP	ls180_veh	NCOR2	946	142340	0.00664606	608.995	26.8597	12.5469	1.55338	2.06773e-36	3.19257e-33	Null_Model_OpenChrom	human
TxnFactorChIPV3	K562+IFNa6h	IRF1	1911	142340	0.0134256	1393.51	41.3637	12.5107	1.37136	3.26075e-36	5.0346e-33	Null_Model_OpenChrom	human
Misc_ChIP	LoVo	REST	8607	142340	0.0604679	7493.35	89.0972	12.4993	1.14862	3.7655e-36	5.81393e-33	Null_Model_OpenChrom	human
TxnFactorChIPV3	HepG2	HDAC2	3570	142340	0.0250808	2816.44	60.3634	12.4837	1.26756	4.58275e-36	7.07577e-33	Null_Model_OpenChrom	human
TxnFactorChIPV3	K562	REST	2840	142340	0.0199522	2227.71	49.1166	12.466	1.27485	5.7205e-36	8.83246e-33	Null_Model_OpenChrom	human
TxnFactorChIPV3	GM12891	PAX5	752	142340	0.00528312	464.319	23.1002	12.4536	1.61958	6.68151e-36	1.03163e-32	Null_Model_OpenChrom	human
Misc_ChIP	LoVo	FOXD2	7409	142340	0.0520514	6362.65	84.2963	12.4128	1.16445	1.11422e-35	1.72035e-32	Null_Model_OpenChrom	human
ReMap_ChIP	h128	MAX	4875	142340	0.034249	4018.66	69.5304	12.316	1.21309	3.7128e-35	5.73256e-32	Null_Model_OpenChrom	human
ReMap_ChIP	esc	SMAD3	1384	142340	0.0097232	979.915	33.0634	12.2215	1.41237	1.19306e-34	1.84208e-31	Null_Model_OpenChrom	human
ReMap_ChIP	ls180_veh	NCOR1	1634	142340	0.0114796	1182.43	37.4362	12.0623	1.3819	8.34804e-34	1.28894e-30	Null_Model_OpenChrom	human
Pazar_Chip	Caco-2_proliferating	CDX2	18387	142340	0.129177	16785.5	133.301	12.0144	1.09541	1.49327e-33	2.30561e-30	Null_Model_OpenChrom	human
Cistrome_ChIP	GM12878	SP1	7468	142340	0.0524659	6455.21	84.7424	11.9514	1.1569	3.19025e-33	4.92574e-30	Null_Model_OpenChrom	human
TxnFactorChIPV3	H1-hESC	SIX5	829	142340	0.00582408	533.697	24.9702	11.8262	1.55331	1.42925e-32	2.20677e-29	Null_Model_OpenChrom	human
Cistrome_ChIP	Osteoblast	EP300	6089	142340	0.0427779	5154.46	79.1421	11.8084	1.18131	1.7669e-32	2.72809e-29	Null_Model_OpenChrom	human
ReMap_ChIP	lcl_hls554p	NIPBL	1814	142340	0.0127441	1341.62	40.0631	11.791	1.3521	2.17271e-32	3.35466e-29	Null_Model_OpenChrom	human
ReMap_ChIP	ls180_125	NCOR1	1676	142340	0.0117746	1231.18	37.9673	11.7157	1.36129	5.2931e-32	8.17255e-29	Null_Model_OpenChrom	human
Cistrome_ChIP	GM12878	NFYB	1647	142340	0.0115709	1223.73	36.3896	11.6318	1.34589	1.42094e-31	2.19393e-28	Null_Model_OpenChrom	human
TxnFactorChIPV3	HepG2	POLR2A	9826	142340	0.0690319	8705.61	96.5405	11.6054	1.1287	1.9353e-31	2.98811e-28	Null_Model_OpenChrom	human
TxnFactorChIPV3	GM12878	TBP	3396	142340	0.0238584	2765.69	54.3241	11.6027	1.2279	1.99551e-31	3.08107e-28	Null_Model_OpenChrom	human
Misc_ChIP	LoVo	TFDP1	4073	142340	0.0286146	3360.69	61.5466	11.5735	1.21195	2.80788e-31	4.33537e-28	Null_Model_OpenChrom	human
Cistrome_ChIP	HEK293	BRD3	3584	142340	0.0251791	2916.81	58.3881	11.4269	1.22874	1.53454e-30	2.36933e-27	Null_Model_OpenChrom	human
Pazar_Chip	Saos	Tp53	3029	142340	0.02128	2430.39	52.7776	11.3421	1.2463	4.06057e-30	6.26952e-27	Null_Model_OpenChrom	human
Misc_ChIP	LoVo	NFKB2	1360	142340	0.00955459	993.94	32.2955	11.3347	1.36829	4.41735e-30	6.82038e-27	Null_Model_OpenChrom	human
TxnFactorChIPV3	A549+EtOH_0.02pct	ATF3	1632	142340	0.0114655	1207.23	37.6028	11.2963	1.35186	6.84038e-30	1.05615e-26	Null_Model_OpenChrom	human
TxnFactorChIPV3	HepG2	ZBTB33	764	142340	0.00536743	493.339	23.9966	11.2792	1.54863	8.31635e-30	1.28405e-26	Null_Model_OpenChrom	human
ReMap_ChIP	flp143ha_0hr	ZNF143	993	142340	0.00697625	679.843	27.9613	11.1996	1.46063	2.04702e-29	3.1606e-26	Null_Model_OpenChrom	human
Misc_ChIP	LoVo	HOXA10	5790	142340	0.0406773	4943.13	75.9485	11.1506	1.17132	3.55716e-29	5.49225e-26	Null_Model_OpenChrom	human
TxnFactorChIPV3	GM12878	PBX3	1649	142340	0.0115849	1247.52	36.2199	11.0846	1.32183	7.44851e-29	1.15005e-25	Null_Model_OpenChrom	human
TxnFactorChIPV3	K562+IFNa30	JUN	1715	142340	0.0120486	1298	37.9049	11.0013	1.32127	1.884e-28	2.9089e-25	Null_Model_OpenChrom	human
Pazar_Chip	hESC	EOMES	8918	142340	0.0626528	7919.43	91.2537	10.9428	1.12609	3.59607e-28	5.55233e-25	Null_Model_OpenChrom	human
TxnFactorChIPV3	Dnd41	EZH2	754	142340	0.00529718	495.234	23.7089	10.9143	1.52251	4.92454e-28	7.60349e-25	Null_Model_OpenChrom	human
Misc_ChIP	LoVo	ESR1	3745	142340	0.0263102	3124.04	57.2338	10.8495	1.19877	1.00296e-27	1.54857e-24	Null_Model_OpenChrom	human
Misc_ChIP	LoVo	ETS2	13733	142340	0.0964803	12459.2	117.467	10.8437	1.10224	1.06785e-27	1.64877e-24	Null_Model_OpenChrom	human
Pazar_Chip	IMR90_shRbQuiescent	P130	2128	142340	0.0149501	1661.04	43.1357	10.8253	1.28112	1.30665e-27	2.01747e-24	Null_Model_OpenChrom	human
Misc_ChIP	LoVo	VEZF1	7103	142340	0.0499016	6234.59	80.3202	10.8118	1.13929	1.5135e-27	2.33684e-24	Null_Model_OpenChrom	human
TxnFactorChIPV3	A549+EtOH_0.02pct	SIN3AK20	1976	142340	0.0138823	1523.78	41.9528	10.7793	1.29677	2.15664e-27	3.32985e-24	Null_Model_OpenChrom	human
Cistrome_ChIP	MCF-10A	MYC	9867	142340	0.0693199	8806.54	98.3895	10.7781	1.12042	2.18301e-27	3.37057e-24	Null_Model_OpenChrom	human
TxnFactorChIPV3	GM12878	TBL1XR1	2957	142340	0.0207742	2411.68	50.6904	10.7578	1.22612	2.72134e-27	4.20175e-24	Null_Model_OpenChrom	human
Pazar_Chip	H1	KLF4	755	142340	0.0053042	498.158	24.0027	10.7006	1.51558	5.05837e-27	7.81012e-24	Null_Model_OpenChrom	human
TxnFactorChIPV3	K562	POLR2A	10724	142340	0.0753407	9611.85	104.137	10.6797	1.11571	6.33361e-27	9.7791e-24	Null_Model_OpenChrom	human
TxnFactorChIPV3	K562	ZNF263	903	142340	0.00634397	621.828	26.3355	10.6765	1.45217	6.55266e-27	1.01173e-23	Null_Model_OpenChrom	human
TxnFactorChIPV3	HeLa-S3	MAFK	1908	142340	0.0134045	1473.77	40.7832	10.6473	1.29464	8.97095e-27	1.38512e-23	Null_Model_OpenChrom	human
Misc_ChIP	LoVo	E2F7	10138	142340	0.0712238	9063.92	101.042	10.6301	1.1185	1.07981e-26	1.66723e-23	Null_Model_OpenChrom	human
Misc_ChIP	LoVo	RXRA	11983	142340	0.0841858	10853.2	106.368	10.6215	1.1041	1.18336e-26	1.82711e-23	Null_Model_OpenChrom	human
ReMap_ChIP	ls180_125	NCOR2	880	142340	0.00618238	606.843	25.9815	10.5135	1.45013	3.742e-26	5.77764e-23	Null_Model_OpenChrom	human
TxnFactorChIPV3	A549+EtOH_0.02pct	REST	2726	142340	0.0191513	2207.2	49.4622	10.4887	1.23505	4.86551e-26	7.51235e-23	Null_Model_OpenChrom	human
Misc_ChIP	GM12878	EBNA2	1320	142340	0.00927357	982.984	32.2135	10.4619	1.34285	6.45862e-26	9.97211e-23	Null_Model_OpenChrom	EBV
Cistrome_ChIP	GM12892	RELA	2251	142340	0.0158142	1785.27	44.8363	10.3874	1.26087	1.41535e-25	2.18531e-22	Null_Model_OpenChrom	human
ReMap_ChIP	k562	ZNF143	1113	142340	0.00781931	799.395	30.2021	10.3836	1.3923	1.47272e-25	2.27387e-22	Null_Model_OpenChrom	human
ReMap_ChIP	caco2_diff	CDX2	2640	142340	0.0185471	2145.2	47.9559	10.3179	1.23066	2.92463e-25	4.51563e-22	Null_Model_OpenChrom	human
ReMap_ChIP	u87	MAX	11651	142340	0.0818533	10542.8	108.245	10.2375	1.10511	6.73496e-25	1.03988e-21	Null_Model_OpenChrom	human
ReMap_ChIP	helab2_grkd_ta_tnfa	RELA	818	142340	0.0057468	562.825	25.1923	10.1291	1.45338	2.05287e-24	3.16963e-21	Null_Model_OpenChrom	human
ReMap_ChIP	u2os_actd	TP53	838	142340	0.00588731	578.801	25.8193	10.039	1.44782	5.13751e-24	7.93231e-21	Null_Model_OpenChrom	human
TxnFactorChIPV3	PANC-1	TCF7L2	3007	142340	0.0211255	2498.17	50.7541	10.0255	1.20368	5.88956e-24	9.09348e-21	Null_Model_OpenChrom	human
Misc_ChIP	LoVo	MNT	11915	142340	0.083708	10846.8	107.025	9.98062	1.09848	9.26482e-24	1.43049e-20	Null_Model_OpenChrom	human
Misc_ChIP	LoVo	ARNT	2169	142340	0.0152382	1735.29	43.6167	9.94361	1.24993	1.34444e-23	2.07582e-20	Null_Model_OpenChrom	human
TxnFactorChIPV3	GM12878	NFYB	2210	142340	0.0155262	1775.16	44.1804	9.84239	1.24496	3.69649e-23	5.70738e-20	Null_Model_OpenChrom	human
TxnFactorChIPV3	GM12878	CHD1	1878	142340	0.0131938	1477.92	40.6516	9.84166	1.2707	3.72345e-23	5.749e-20	Null_Model_OpenChrom	human
TxnFactorChIPV3	HepG2	MYBL2	3752	142340	0.0263594	3184.39	57.8512	9.81154	1.17825	5.0211e-23	7.75258e-20	Null_Model_OpenChrom	human
Misc_ChIP	LoVo	ZFHX3	1715	142340	0.0120486	1349.68	37.7416	9.67951	1.27067	1.84247e-22	2.84478e-19	Null_Model_OpenChrom	human
TxnFactorChIPV3	T-47D+DMSO_0.02pct	GATA3	4901	142340	0.0344316	4237.35	68.6857	9.66217	1.15662	2.18262e-22	3.36997e-19	Null_Model_OpenChrom	human
TxnFactorChIPV3	K562	SPI1	3602	142340	0.0253056	3057.59	56.6777	9.6054	1.17805	3.79321e-22	5.85672e-19	Null_Model_OpenChrom	human
Misc_ChIP	LoVo	TEAD2	6676	142340	0.0469018	5908.15	79.995	9.59875	1.12996	4.0461e-22	6.24718e-19	Null_Model_OpenChrom	human
Misc_ChIP	LoVo	HOXA1	8898	142340	0.0625123	8007.28	93.0768	9.56974	1.11124	5.35893e-22	8.27419e-19	Null_Model_OpenChrom	human
TxnFactorChIPV3	GM12878	EBF1	7062	142340	0.0496136	6316.71	78.8336	9.4539	1.11799	1.63213e-21	2.52e-18	Null_Model_OpenChrom	human
TxnFactorChIPV3	K562	TRIM28	2062	142340	0.0144864	1661.12	42.4785	9.43726	1.24133	1.91334e-21	2.9542e-18	Null_Model_OpenChrom	human
Cistrome_ChIP	GM10855	VDR	1333	142340	0.0093649	1016.09	34.0344	9.31143	1.31189	6.30642e-21	9.73711e-18	Null_Model_OpenChrom	human
Misc_ChIP	LoVo	SOX4	1773	142340	0.0124561	1414.91	39.1302	9.15126	1.25308	2.81365e-20	4.34428e-17	Null_Model_OpenChrom	human
Cistrome_ChIP	CD4+	SRCAP	946	142340	0.00664606	694.432	27.6713	9.09132	1.36227	4.89219e-20	7.55355e-17	Null_Model_OpenChrom	human
TxnFactorChIPV3	K562	NFYA	902	142340	0.00633694	658.812	26.8571	9.05487	1.36913	6.83626e-20	1.05552e-16	Null_Model_OpenChrom	human
Misc_ChIP	LoVo	CREB3L4	1100	142340	0.00772798	827.349	30.4181	8.96346	1.32955	1.57317e-19	2.42897e-16	Null_Model_OpenChrom	human
TxnFactorChIPV3	A549+EtOH_0.02pct	ZBTB33	1689	142340	0.011866	1355.16	37.2545	8.96115	1.24635	1.60658e-19	2.48056e-16	Null_Model_OpenChrom	human
TxnFactorChIPV3	GM12892	POLR2A	9172	142340	0.0644373	8350.27	91.7351	8.95763	1.09841	1.6587e-19	2.56103e-16	Null_Model_OpenChrom	human
Misc_ChIP	LoVo	SP3	2197	142340	0.0154349	1810.96	44.0179	8.77015	1.21317	8.92177e-19	1.37752e-15	Null_Model_OpenChrom	human
TxnFactorChIPV3	K562	NFYB	1493	142340	0.010489	1180.83	35.8639	8.70442	1.26437	1.59601e-18	2.46424e-15	Null_Model_OpenChrom	human
Misc_ChIP	LoVo	RFX1	8108	142340	0.0569622	7363.96	87.2314	8.52952	1.10104	7.34757e-18	1.13447e-14	Null_Model_OpenChrom	human
TxnFactorChIPV3	U2OS	SETDB1	1480	142340	0.0103976	1183.29	34.9977	8.47793	1.25075	1.14617e-17	1.76969e-14	Null_Model_OpenChrom	human
TxnFactorChIPV3	K562	MEF2A	916	142340	0.0064353	687.108	27.4998	8.32342	1.33312	4.27289e-17	6.59734e-14	Null_Model_OpenChrom	human
Misc_ChIP	LoVo	FOXG1	6295	142340	0.0442251	5664.67	77.0924	8.17635	1.11127	1.46288e-16	2.25868e-13	Null_Model_OpenChrom	human
ReMap_ChIP	hpball	NOTCH1	3772	142340	0.0264999	3288.21	59.2192	8.16945	1.14713	1.54894e-16	2.39157e-13	Null_Model_OpenChrom	human
ReMap_ChIP	tall_prima5	TAL1	1718	142340	0.0120697	1407.01	38.1051	8.16135	1.22103	1.65653e-16	2.55768e-13	Null_Model_OpenChrom	human
Misc_ChIP	LoVo	ZBTB7B	2419	142340	0.0169945	2058.8	44.1582	8.15705	1.17496	1.71654e-16	2.65034e-13	Null_Model_OpenChrom	human
ReMap_ChIP	helab2_wt_ta_tnfa	RELA	2066	142340	0.0145145	1725.29	42.4094	8.03388	1.19748	4.72181e-16	7.29048e-13	Null_Model_OpenChrom	human
ReMap_ChIP	fibrobj_post	KLF4	1958	142340	0.0137558	1627.33	41.5469	7.95892	1.2032	8.67741e-16	1.33979e-12	Null_Model_OpenChrom	human
ReMap_ChIP	lclgm18951	NFKB1	1800	142340	0.0126458	1483.4	39.8098	7.9527	1.21342	9.12466e-16	1.40885e-12	Null_Model_OpenChrom	human
Cistrome_ChIP	UPR9	PML	2040	142340	0.0143319	1708.82	42.0753	7.87125	1.19381	1.75564e-15	2.71071e-12	Null_Model_OpenChrom	human
TxnFactorChIPV3	PFSK-1	REST	1912	142340	0.0134326	1602.07	40.0586	7.73699	1.19346	5.08974e-15	7.85855e-12	Null_Model_OpenChrom	human
TxnFactorChIPV3	GM12878	POLR2A	10067	142340	0.070725	9352.19	93.5832	7.63823	1.07643	1.10113e-14	1.70014e-11	Null_Model_OpenChrom	human
Misc_ChIP	LoVo	NR3C1	4508	142340	0.0316706	4021.46	64.2658	7.57073	1.12099	1.85573e-14	2.86525e-11	Null_Model_OpenChrom	human
TxnFactorChIPV3	HeLa-S3	NFYB	1333	142340	0.0093649	1082.13	33.4249	7.50555	1.23183	3.05847e-14	4.72228e-11	Null_Model_OpenChrom	human
Misc_ChIP	LoVo	TP73	7024	142340	0.0493466	6412.19	82.7375	7.39455	1.09541	7.09466e-14	1.09542e-10	Null_Model_OpenChrom	human
Misc_ChIP	LoVo	SMAD3	1845	142340	0.0129619	1554.26	39.5405	7.35303	1.18706	9.68796e-14	1.49582e-10	Null_Model_OpenChrom	human
TxnFactorChIPV3	HUVEC	POLR2A	11193	142340	0.0786357	10452.4	103.328	7.16727	1.07085	3.82552e-13	5.9066e-10	Null_Model_OpenChrom	human
TxnFactorChIPV3	HeLa-S3	CEBPB	7823	142340	0.05496	7218.98	84.5234	7.14617	1.08367	4.46147e-13	6.8885e-10	Null_Model_OpenChrom	human
Misc_ChIP	BCells+Sendai_Virus	NELFA	4072	142340	0.0286076	3638.42	61.7969	7.01615	1.11917	1.14034e-12	1.76068e-09	Null_Model_OpenChrom	human
Cistrome_ChIP	HeLa-S3	NFYB	1243	142340	0.00873261	1015.92	32.4961	6.98803	1.22353	1.39382e-12	2.15206e-09	Null_Model_OpenChrom	human
Misc_ChIP	GM12878	RelA	3586	142340	0.0251932	3197.41	56.763	6.84579	1.12153	3.80267e-12	5.87132e-09	Null_Model_OpenChrom	human
Misc_ChIP	LoVo	HOXA7	2635	142340	0.018512	2295.61	50.3491	6.74079	1.14784	7.87641e-12	1.21612e-08	Null_Model_OpenChrom	human
ReMap_ChIP	kasumi1_leukemic	TCF12	5940	142340	0.0417311	5426.49	76.4942	6.71304	1.09463	9.53056e-12	1.47152e-08	Null_Model_OpenChrom	human
Misc_ChIP	LoVo	TFAP2A	817	142340	0.00573978	643.944	25.7901	6.71018	1.26874	9.71912e-12	1.50063e-08	Null_Model_OpenChrom	human
Cistrome_ChIP	EndothelialCell	RELA	1070	142340	0.00751721	870.79	29.8807	6.66684	1.22877	1.30686e-11	2.01779e-08	Null_Model_OpenChrom	human
Misc_ChIP	LoVo	EHF	6665	142340	0.0468245	6142.64	78.678	6.63917	1.08504	1.57729e-11	2.43534e-08	Null_Model_OpenChrom	human
Misc_ChIP	LoVo	E2F8	4110	142340	0.0288745	3714.93	59.6396	6.6243	1.10635	1.74445e-11	2.69342e-08	Null_Model_OpenChrom	human
Cistrome_ChIP	CD14+	IRF1	5938	142340	0.041717	5441.28	75.1537	6.60942	1.09129	1.92919e-11	2.97867e-08	Null_Model_OpenChrom	human
TxnFactorChIPV3	U87	POLR2A	7535	142340	0.0529366	6980.05	84.2555	6.5865	1.07951	2.25154e-11	3.47637e-08	Null_Model_OpenChrom	human
ReMap_ChIP	liver	FOXA1	6156	142340	0.0432486	5667.18	75.2553	6.49544	1.08625	4.13962e-11	6.39158e-08	Null_Model_OpenChrom	human
Misc_ChIP	LoVo	SP2	1464	142340	0.0102852	1244.34	34.2712	6.40934	1.17652	7.30775e-11	1.12832e-07	Null_Model_OpenChrom	human
ReMap_ChIP	apl	REST	823	142340	0.00578193	654.457	26.4498	6.37221	1.25753	9.31626e-11	1.43843e-07	Null_Model_OpenChrom	human
Misc_ChIP	LoVo	ETV4	2089	142340	0.0146761	1823.58	41.7086	6.36378	1.14555	9.84221e-11	1.51964e-07	Null_Model_OpenChrom	human
Misc_ChIP	LoVo	ELF1	2372	142340	0.0166643	2083.32	46.3653	6.22611	1.13856	2.3908e-10	3.6914e-07	Null_Model_OpenChrom	human
TxnFactorChIPV3	HepG2+forskolin	CEBPB	2679	142340	0.0188211	2385.68	47.3191	6.19868	1.12295	2.84701e-10	4.39579e-07	Null_Model_OpenChrom	human
Misc_ChIP	LoVo	SP1	1004	142340	0.00705353	827.388	28.8628	6.11902	1.21346	4.70754e-10	7.26845e-07	Null_Model_OpenChrom	human
Misc_ChIP	LoVo	GMEB1	6045	142340	0.0424687	5595.03	74.7399	6.02043	1.08042	8.69782e-10	1.34294e-06	Null_Model_OpenChrom	human
Cistrome_ChIP	HeLa-S3	STAT1	1617	142340	0.0113601	1384.88	38.945	5.96012	1.16761	1.26027e-09	1.94585e-06	Null_Model_OpenChrom	human
Misc_ChIP	LoVo	NR2F1	1840	142340	0.0129268	1611.1	39.3097	5.82289	1.14207	2.89187e-09	4.46504e-06	Null_Model_OpenChrom	human
Misc_ChIP	BCells	NELFA	2910	142340	0.020444	2602.41	52.9417	5.80991	1.11819	3.12526e-09	4.82541e-06	Null_Model_OpenChrom	human
Misc_ChIP	LoVo	RFX5	4407	142340	0.0309611	4055.54	61.1913	5.74362	1.08666	4.63377e-09	7.15454e-06	Null_Model_OpenChrom	human
TxnFactorChIPV3	HeLa-S3	SMARCC1	2093	142340	0.0147042	1848.91	42.7206	5.71371	1.13202	5.52706e-09	8.53378e-06	Null_Model_OpenChrom	human
TxnFactorChIPV3	K562	NR2F2	2588	142340	0.0181818	2316.17	48.145	5.64605	1.11736	8.20887e-09	1.26745e-05	Null_Model_OpenChrom	human
Misc_ChIP	LoVo	TBX3	1392	142340	0.0097794	1193.45	35.3133	5.6226	1.16637	9.40545e-09	1.4522e-05	Null_Model_OpenChrom	human
Cistrome_ChIP	GM12878	NFATC1	7349	142340	0.0516299	6906.37	80.2438	5.51607	1.06409	1.73334e-08	2.67628e-05	Null_Model_OpenChrom	human
Misc_ChIP	LoVo	ETV7	1023	142340	0.00718702	856.861	30.2042	5.50052	1.19389	1.89334e-08	2.92332e-05	Null_Model_OpenChrom	human
TxnFactorChIPV3	K562	EP300	4059	142340	0.0285162	3751.89	59.3688	5.17285	1.08185	1.15274e-07	0.000177984	Null_Model_OpenChrom	human
Cistrome_ChIP	CD133+	POLR2A	824	142340	0.00578896	685.961	26.7695	5.15658	1.20123	1.25752e-07	0.000194161	Null_Model_OpenChrom	human
ReMap_ChIP	imr90_senescent_ras_rbhairpin	E2F7	746	142340	0.00524097	613.513	25.8683	5.12158	1.21595	1.51492e-07	0.000233904	Null_Model_OpenChrom	human
Misc_ChIP	LoVo	HOXA13	5983	142340	0.0420332	5609.9	72.8985	5.1181	1.06651	1.54315e-07	0.000238263	Null_Model_OpenChrom	human
TxnFactorChIPV3	GM12878	MEF2A	2544	142340	0.0178727	2292.57	49.8376	5.04493	1.10967	2.26838e-07	0.000350238	Null_Model_OpenChrom	human
Misc_ChIP	LoVo	CEBPG	1607	142340	0.0112899	1417.29	38.0924	4.98037	1.13386	3.17311e-07	0.000489928	Null_Model_OpenChrom	human
Misc_ChIP	LoVo	E2F4	1159	142340	0.00814248	1003.33	31.5984	4.92649	1.15515	4.18605e-07	0.000646326	Null_Model_OpenChrom	human
TxnFactorChIPV3	K562	ATF1	2095	142340	0.0147183	1878.42	44.0944	4.91166	1.1153	4.51552e-07	0.000697197	Null_Model_OpenChrom	human
ReMap_ChIP	nccit_snf5	POU5F1	1938	142340	0.0136153	1742.26	41.9523	4.66566	1.11235	1.53816e-06	0.00237491	Null_Model_OpenChrom	human
TxnFactorChIPV3	K562	CEBPB	4552	142340	0.0319798	4245.83	65.8454	4.64987	1.07211	1.6607e-06	0.00256412	Null_Model_OpenChrom	human
Misc_ChIP	LoVo	AEBP2	716	142340	0.00503021	605.638	24.0324	4.5922	1.18222	2.193e-06	0.00338599	Null_Model_OpenChrom	human
TxnFactorChIPV3	GM12891+TNFa	RELA	5090	142340	0.0357594	4770.78	69.6016	4.5864	1.06691	2.25479e-06	0.00348139	Null_Model_OpenChrom	human
Misc_ChIP	LoVo	SMAD2	1059	142340	0.00743993	923.771	29.6235	4.56492	1.14639	2.49844e-06	0.0038576	Null_Model_OpenChrom	human
ReMap_ChIP	lncap	SUZ12	1096	142340	0.00769987	961.273	31.0616	4.33742	1.14016	7.20829e-06	0.0111296	Null_Model_OpenChrom	human
ReMap_ChIP	mcf7_untreat	ESR1	3824	142340	0.0268653	3570.47	61.3329	4.13366	1.07101	1.78513e-05	0.0275624	Null_Model_OpenChrom	human
Misc_ChIP	LoVo	GATA6	1660	142340	0.0116622	1497.82	40.1236	4.04194	1.10828	2.65059e-05	0.0409251	Null_Model_OpenChrom	human
ReMap_ChIP	nci_h2087	NKX2-1	1719	142340	0.0120767	1562.04	38.9175	4.03313	1.10048	2.75199e-05	0.0424907	Null_Model_OpenChrom	human
ReMap_ChIP	imr90_senescent_ras	E2F7	1687	142340	0.0118519	1530.82	38.8152	4.0236	1.10202	2.86573e-05	0.0442469	Null_Model_OpenChrom	human
ReMap_ChIP	t47d_dmso	FOXA1	3983	142340	0.0279823	3745.27	61.6132	3.85838	1.06347	5.70701e-05	0.0881162	Null_Model_OpenChrom	human
Artem-ChIP	Naive_CD4_Tcell_EI_5h_6	NFATC2	5973	142340	0.0419629	5687.91	74.0921	3.84784	1.05012	5.9581e-05	0.091993	Null_Model_OpenChrom	human
TxnFactorChIPV3	GM12891	POLR2A	8011	142340	0.0562807	7696.92	83.9458	3.74142	1.04081	9.149e-05	0.141261	Null_Model_OpenChrom	human
TxnFactorChIPV3	H1-hESC	NANOG	747	142340	0.005248	651.639	25.4879	3.74141	1.14634	9.14957e-05	0.141269	Null_Model_OpenChrom	human
TxnFactorChIPV3	NHDF-Ad	EZH2	2140	142340	0.0150344	1972.61	45.2576	3.69853	1.08486	0.000108425	0.167409	Null_Model_OpenChrom	human
Cistrome_ChIP	HCT-116	EP300	2141	142340	0.0150415	1982.94	44.5175	3.55056	1.07971	0.000192208	0.29677	Null_Model_OpenChrom	human
Cistrome_ChIP	Jurkat	GABPA	1551	142340	0.0108964	1417.68	37.6868	3.53746	1.09404	0.000201996	0.311882	Null_Model_OpenChrom	human
Cistrome_ChIP	GM12891	RELA	3635	142340	0.0255374	3448.67	57.4781	3.24184	1.05403	0.000593809	0.916842	Null_Model_OpenChrom	human
TxnFactorChIPV3	SK-N-SH	POLR2A	8183	142340	0.0574891	7904.68	87.964	3.16401	1.03521	0.000778067	1	Null_Model_OpenChrom	human
TxnFactorChIPV3	PFSK-1	SIN3AK20	1353	142340	0.00950541	1246.51	35.6467	2.9873	1.08543	0.00140726	1	Null_Model_OpenChrom	human
TxnFactorChIPV3	HepG2+forskolin	HNF4A	1654	142340	0.0116201	1539.8	39.3753	2.90029	1.07417	0.00186408	1	Null_Model_OpenChrom	human
TxnFactorChIPV3	GM12878	MEF2C	1353	142340	0.00950541	1251.93	35.5032	2.84679	1.08073	0.00220815	1	Null_Model_OpenChrom	human
Misc_ChIP	LoVo	NFIL3	739	142340	0.00519179	663.929	26.5877	2.82352	1.11307	0.00237497	1	Null_Model_OpenChrom	human
ReMap_ChIP	u2os_eto	TP53	817	142340	0.00573978	743.666	26.7964	2.7367	1.09861	0.00310295	1	Null_Model_OpenChrom	human
TxnFactorChIPV3	NH-A	EZH2	2375	142340	0.0166854	2251.94	46.0132	2.67436	1.05464	0.00374358	1	Null_Model_OpenChrom	human
ReMap_ChIP	ls180_veh	RXRA	716	142340	0.00503021	651.57	26.0838	2.4701	1.09888	0.0067538	1	Null_Model_OpenChrom	human
Pazar_Chip	VCS2	AR	8485	142340	0.0596108	8275.45	85.271	2.45751	1.02532	0.00699518	1	Null_Model_OpenChrom	human
TxnFactorChIPV3	GM12892+TNFa	RELA	1676	142340	0.0117746	1581.2	39.3576	2.40874	1.05996	0.00800383	1	Null_Model_OpenChrom	human
TxnFactorChIPV3	HepG2	EZH2	1305	142340	0.00916819	1222.29	35.3664	2.33853	1.06766	0.00967995	1	Null_Model_OpenChrom	human
TxnFactorChIPV3	HeLa-S3	REST	1381	142340	0.00970212	1296.74	36.7668	2.29171	1.06498	0.0109613	1	Null_Model_OpenChrom	human
ReMap_ChIP	lclib4	RBPJ	4697	142340	0.0329985	4546.48	67.0579	2.24467	1.03311	0.0123948	1	Null_Model_OpenChrom	human
Cistrome_ChIP	GM19193	RELA	1363	142340	0.00957566	1287.9	34.4627	2.17925	1.05831	0.0146564	1	Null_Model_OpenChrom	human
Cistrome_ChIP	H929	SPI1	1832	142340	0.0128706	1740.96	41.9417	2.17063	1.05229	0.0149795	1	Null_Model_OpenChrom	human
Misc_ChIP	LoVo	NFE2L2	6324	142340	0.0444288	6154.44	78.5678	2.15818	1.02755	0.0154569	1	Null_Model_OpenChrom	human
TxnFactorChIPV3	NHEK	EZH2	2575	142340	0.0180905	2469	50.3061	2.1071	1.04293	0.0175544	1	Null_Model_OpenChrom	human
Misc_ChIP	LoVo	ZNF407	4309	142340	0.0302726	4173.61	64.3258	2.10475	1.03244	0.0176566	1	Null_Model_OpenChrom	human
TxnFactorChIPV3	GM10847+TNFa	RELA	1870	142340	0.0131376	1786.5	40.1625	2.07899	1.04674	0.0188091	1	Null_Model_OpenChrom	human
TxnFactorChIPV3	U2OS	KAP1	2757	142340	0.0193691	2655.13	49.9576	2.03915	1.03837	0.0207175	1	Null_Model_OpenChrom	human
ReMap_ChIP	rwpe1	ERG	1190	142340	0.00836026	1121.8	33.624	2.02822	1.06079	0.0212689	1	Null_Model_OpenChrom	human
Misc_ChIP	GM12878	RelB	4290	142340	0.0301391	4166.29	62.2802	1.98638	1.02969	0.0234954	1	Null_Model_OpenChrom	human
TxnFactorChIPV3	HeLa-S3	TCF7L2	3759	142340	0.0264086	3642.96	59.0408	1.96549	1.03185	0.0246789	1	Null_Model_OpenChrom	human
ReMap_ChIP	ls180_125	CDX2	3927	142340	0.0275889	3806.74	61.2348	1.96386	1.03159	0.024773	1	Null_Model_OpenChrom	human
Cistrome_ChIP	GM12878	EP300	1172	142340	0.00823381	1115.48	34.0426	1.6604	1.05067	0.0484168	1	Null_Model_OpenChrom	human
TxnFactorChIPV3	HSMMtube	EZH2	1378	142340	0.00968105	1317.31	36.683	1.65454	1.04607	0.0490093	1	Null_Model_OpenChrom	human
TxnFactorChIPV3	NHLF	EZH2	2368	142340	0.0166362	2297.77	48.8841	1.43668	1.03056	0.0754047	1	Null_Model_OpenChrom	human
Cistrome_ChIP	Namalwa	PAX5	2171	142340	0.0152522	2108.03	46.85	1.34397	1.02987	0.0894791	1	Null_Model_OpenChrom	human
ReMap_ChIP	liver	ONECUT1	1663	142340	0.0116833	1615.53	40.369	1.17601	1.02939	0.119795	1	Null_Model_OpenChrom	human
TxnFactorChIPV3	HepG2	RXRA	2287	142340	0.0160672	2235	44.9948	1.15558	1.02326	0.123927	1	Null_Model_OpenChrom	human
ReMap_ChIP	tall_rpmi8402	GATA3	1705	142340	0.0119784	1661.64	40.76	1.06388	1.0261	0.143692	1	Null_Model_OpenChrom	human
Misc_ChIP	LoVo	BARX2	942	142340	0.00661796	910.939	29.1969	1.06384	1.0341	0.1437	1	Null_Model_OpenChrom	human
TxnFactorChIPV3	A549+EtOH_0.02pct	TCF12	3582	142340	0.0251651	3520.4	58.4233	1.05445	1.0175	0.145839	1	Null_Model_OpenChrom	human
ReMap_ChIP	mcf7_xeno	ESR1	6157	142340	0.0432556	6083.18	75.0613	0.983438	1.01213	0.162696	1	Null_Model_OpenChrom	human
ReMap_ChIP	ls180_veh	CEBPB	8526	142340	0.0598988	8437.56	90.835	0.97365	1.01048	0.165115	1	Null_Model_OpenChrom	human
ReMap_ChIP	vcap_dex	NR3C1	1593	142340	0.0111915	1557.38	39.4197	0.903543	1.02287	0.183119	1	Null_Model_OpenChrom	human
TxnFactorChIPV3	HUVEC	EZH2	2150	142340	0.0151047	2111.67	45.9477	0.834115	1.01815	0.202108	1	Null_Model_OpenChrom	human
Pazar_Chip	PC3	GABPA	1094	142340	0.00768582	1069.3	31.9297	0.773553	1.0231	0.219598	1	Null_Model_OpenChrom	human
Cistrome_ChIP	Raji	PAX5	1516	142340	0.0106506	1491.3	39.0913	0.631862	1.01656	0.263738	1	Null_Model_OpenChrom	human
TxnFactorChIPV3	NT2-D1	SUZ12	847	142340	0.00595054	828.459	29.9501	0.619079	1.02238	0.267932	1	Null_Model_OpenChrom	human
ReMap_ChIP	jurkat	RUNX1	926	142340	0.00650555	907.807	30.4892	0.596697	1.02004	0.275355	1	Null_Model_OpenChrom	human
TxnFactorChIPV3	K562	JUN	1463	142340	0.0102782	1445.14	36.099	0.494866	1.01236	0.310348	1	Null_Model_OpenChrom	human
Misc_ChIP	LoVo	ESRRA	1359	142340	0.00954756	1342.4	35.0459	0.473705	1.01237	0.317855	1	Null_Model_OpenChrom	human
Pazar_Chip	CD34	GATA1	4679	142340	0.032872	4651.48	69.1402	0.398082	1.00592	0.345285	1	Null_Model_OpenChrom	human
TxnFactorChIPV3	HepG2	FOSL2	3398	142340	0.0238724	3386.25	55.723	0.210833	1.00347	0.416509	1	Null_Model_OpenChrom	human
TxnFactorChIPV3	GM12878	STAT5A	1402	142340	0.00984966	1397.28	38.2841	0.12327	1.00338	0.450947	1	Null_Model_OpenChrom	human
Misc_ChIP	LoVo	KLF3	801	142340	0.00562737	799.333	27.9406	0.0596742	1.00209	0.476208	1	Null_Model_OpenChrom	human
ReMap_ChIP	blood_monocyte	SPI1	6328	142340	0.0444569	6327.32	81.4374	0.00829257	1.00011	0.496692	1	Null_Model_OpenChrom	human
TxnFactorChIPV3	GM12878	NFE2	172	142340	0.00120837	113.126	10.5972	0	1.52043	0.5	1	Null_Model_OpenChrom	human
TxnFactorChIPV3	T-47D+Genistein_100nM	ESR1	575	142340	0.00403962	1149.18	37.8072	0	0.500355	0.5	1	Null_Model_OpenChrom	human
TxnFactorChIPV3	HepG2	IRF3	177	142340	0.0012435	110.242	10.7032	0	1.60556	0.5	1	Null_Model_OpenChrom	human
TxnFactorChIPV3	HepG2+forskolin	PPARGC1A	309	142340	0.00217086	221.219	14.3678	0	1.39681	0.5	1	Null_Model_OpenChrom	human
TxnFactorChIPV3	HeLa-S3	EZH2	167	142340	0.00117325	193.699	13.8578	0	0.862161	0.5	1	Null_Model_OpenChrom	human
TxnFactorChIPV3	T-47D+Estradiol_10nM	ESR1	572	142340	0.00401855	1147.88	38.064	0	0.498311	0.5	1	Null_Model_OpenChrom	human
TxnFactorChIPV3	HeLa-S3	FAM48A	158	142340	0.00111002	137.023	11.7768	0	1.15309	0.5	1	Null_Model_OpenChrom	human
TxnFactorChIPV3	HepG2+forskolin	HSF1	359	142340	0.00252213	220.611	15.0682	0	1.6273	0.5	1	Null_Model_OpenChrom	human
TxnFactorChIPV3	K562	ZNF274	194	142340	0.00136293	244.469	15.9962	0	0.793558	0.5	1	Null_Model_OpenChrom	human
TxnFactorChIPV3	GM12878	NFYA	535	142340	0.00375861	324.651	19.1232	0	1.64792	0.5	1	Null_Model_OpenChrom	human
TxnFactorChIPV3	HeLa-S3	NR2C2	521	142340	0.00366025	359.998	19.533	0	1.44723	0.5	1	Null_Model_OpenChrom	human
TxnFactorChIPV3	HeLa-S3	BDP1	72	142340	0.000505831	70.3806	8.54108	0	1.02301	0.5	1	Null_Model_OpenChrom	human
Artem-ChIP	Naive_CD4_Tcell_EI_5h_2	NFKB1	505	142340	0.00354784	344.353	18.4885	0	1.46652	0.5	1	Null_Model_OpenChrom	human
TxnFactorChIPV3	PBDEFetal	GATA1	230	142340	0.00161585	375.601	19.7195	0	0.612351	0.5	1	Null_Model_OpenChrom	human
TxnFactorChIPV3	HeLa-S3	SMARCC2	644	142340	0.00452438	540.737	23.6717	0	1.19097	0.5	1	Null_Model_OpenChrom	human
TxnFactorChIPV3	HEK293	ELK4	460	142340	0.0032317	272.59	17.4274	0	1.68751	0.5	1	Null_Model_OpenChrom	human
TxnFactorChIPV3	NT2-D1	ZNF274	33	142340	0.000231839	43.7483	6.61412	0	0.754316	0.5	1	Null_Model_OpenChrom	human
TxnFactorChIPV3	HepG2	BRCA1	638	142340	0.00448223	271.124	20.0426	0	2.35317	0.5	1	Null_Model_OpenChrom	human
Cistrome_ChIP	DendriticCell	CBFA2T3	82	142340	0.000576085	111.582	10.3643	0	0.734883	0.5	1	Null_Model_OpenChrom	human
TxnFactorChIPV3	HeLa-S3	SMARCA4	330	142340	0.00231839	319.146	18.4385	0	1.03401	0.5	1	Null_Model_OpenChrom	human
TxnFactorChIPV3	HeLa-S3	RPC155	282	142340	0.00198117	300.852	17.7639	0	0.937337	0.5	1	Null_Model_OpenChrom	human
TxnFactorChIPV3	GM12878	NR2C2	248	142340	0.00174231	175.101	13.2336	0	1.41633	0.5	1	Null_Model_OpenChrom	human
TxnFactorChIPV3	HeLa-S3	PRDM1	421	142340	0.00295771	584.74	23.9241	0	0.719978	0.5	1	Null_Model_OpenChrom	human
TxnFactorChIPV3	HepG2+forskolin	ESRRA	296	142340	0.00207953	188.164	14.206	0	1.5731	0.5	1	Null_Model_OpenChrom	human
TxnFactorChIPV3	T-47D+BPA_100nM	ESR1	190	142340	0.00133483	427.064	22.6345	0	0.444898	0.5	1	Null_Model_OpenChrom	human
TxnFactorChIPV3	GM12878	RCOR1	375	142340	0.00263454	286.774	17.2324	0	1.30765	0.5	1	Null_Model_OpenChrom	human
Cistrome_ChIP	BG03	SMAD3	203	142340	0.00142616	340.063	18.6929	0	0.596948	0.5	1	Null_Model_OpenChrom	human
TxnFactorChIPV3	HepG2+forskolin	GRp20	191	142340	0.00134186	106.312	10.5633	0	1.7966	0.5	1	Null_Model_OpenChrom	human
Cistrome_ChIP	CD133+	IKZF1	417	142340	0.00292961	161.405	15.102	0	2.58357	0.5	1	Null_Model_OpenChrom	human
TxnFactorChIPV3	K562	KAP1	285	142340	0.00200225	278.701	17.0009	0	1.0226	0.5	1	Null_Model_OpenChrom	human
Cistrome_ChIP	CD4+	EP300	388	142340	0.00272587	272.021	17.3814	0	1.42636	0.5	1	Null_Model_OpenChrom	human
TxnFactorChIPV3	HepG2	SP2	539	142340	0.00378671	359.311	19.4576	0	1.50009	0.5	1	Null_Model_OpenChrom	human
Cistrome_ChIP	CD34+	IRF2	167	142340	0.00117325	156.832	12.4158	0	1.06483	0.5	1	Null_Model_OpenChrom	human
TxnFactorChIPV3	K562	EZH2	422	142340	0.00296473	404.457	19.8195	0	1.04338	0.5	1	Null_Model_OpenChrom	human
TxnFactorChIPV3	K562	RPC155	194	142340	0.00136293	167.521	13.027	0	1.15806	0.5	1	Null_Model_OpenChrom	human
Cistrome_ChIP	CD34+	GFI1B	69	142340	0.000484755	46.9401	6.64698	0	1.46996	0.5	1	Null_Model_OpenChrom	human
TxnFactorChIPV3	K562	GATA1	573	142340	0.00402557	692.011	26.5208	0	0.828022	0.5	1	Null_Model_OpenChrom	human
TxnFactorChIPV3	K562	RFX5	636	142340	0.00446817	362.791	20.3457	0	1.75307	0.5	1	Null_Model_OpenChrom	human
TxnFactorChIPV3	H1-hESC	KDM5A	551	142340	0.00387101	283.37	18.9262	0	1.94446	0.5	1	Null_Model_OpenChrom	human
TxnFactorChIPV3	H1-hESC	JUN	589	142340	0.00413798	324.5	20.235	0	1.8151	0.5	1	Null_Model_OpenChrom	human
TxnFactorChIPV3	K562	GTF3C2	395	142340	0.00277505	219.012	15.9867	0	1.80355	0.5	1	Null_Model_OpenChrom	human
TxnFactorChIPV3	K562	HDAC6	320	142340	0.00224814	160.195	14.0151	0	1.99757	0.5	1	Null_Model_OpenChrom	human
TxnFactorChIPV3	K562	HDAC8	473	142340	0.00332303	339.476	19.0554	0	1.39333	0.5	1	Null_Model_OpenChrom	human
TxnFactorChIPV3	K562+IFNa30	IRF1	180	142340	0.00126458	200.135	13.9873	0	0.899394	0.5	1	Null_Model_OpenChrom	human
TxnFactorChIPV3	H1-hESC	FOSL1	458	142340	0.00321765	158.79	15.3883	0	2.88431	0.5	1	Null_Model_OpenChrom	human
TxnFactorChIPV3	K562+IFNa30	STAT1	266	142340	0.00186876	253.209	16.7268	0	1.05052	0.5	1	Null_Model_OpenChrom	human
TxnFactorChIPV3	K562+IFNa30	STAT2	595	142340	0.00418013	483.164	22.433	0	1.23147	0.5	1	Null_Model_OpenChrom	human
TxnFactorChIPV3	K562+IFNa6h	JUN	512	142340	0.00359702	777.323	29.7203	0	0.658671	0.5	1	Null_Model_OpenChrom	human
TxnFactorChIPV3	K562+IFNa6h	STAT1	313	142340	0.00219896	252.706	15.8903	0	1.23859	0.5	1	Null_Model_OpenChrom	human
TxnFactorChIPV3	K562+IFNa6h	STAT2	262	142340	0.00184066	280.608	16.6793	0	0.933686	0.5	1	Null_Model_OpenChrom	human
TxnFactorChIPV3	K562+IFNg30	STAT1	412	142340	0.00289448	332.245	18.6556	0	1.24005	0.5	1	Null_Model_OpenChrom	human
TxnFactorChIPV3	K562+IFNg6h	JUN	552	142340	0.00387804	948.719	32.8413	0	0.581837	0.5	1	Null_Model_OpenChrom	human
TxnFactorChIPV3	GM18526+TNFa	RELA	543	142340	0.00381481	592.939	25.4608	0	0.915777	0.5	1	Null_Model_OpenChrom	human
TxnFactorChIPV3	K562+IFNg6h	STAT1	626	142340	0.00439792	403.355	21.5398	0	1.55198	0.5	1	Null_Model_OpenChrom	human
TxnFactorChIPV3	H1-hESC	BCL11A	185	142340	0.0012997	279.227	17.0117	0	0.662544	0.5	1	Null_Model_OpenChrom	human
TxnFactorChIPV3	GM12878	ZZZ3	112	142340	0.000786848	93.4466	9.61381	0	1.19855	0.5	1	Null_Model_OpenChrom	human
Cistrome_ChIP	CD34+	LMO2	149	142340	0.00104679	139.574	11.3519	0	1.06753	0.5	1	Null_Model_OpenChrom	human
TxnFactorChIPV3	H1-hESC	POU5F1	335	142340	0.00235352	419.519	20.4597	0	0.798533	0.5	1	Null_Model_OpenChrom	human
TxnFactorChIPV3	K562	SIRT6	287	142340	0.0020163	322.679	17.2898	0	0.889428	0.5	1	Null_Model_OpenChrom	human
TxnFactorChIPV3	K562	USF2	669	142340	0.00470001	436.357	21.8573	0	1.53315	0.5	1	Null_Model_OpenChrom	human
Cistrome_ChIP	GM10847	RELA	654	142340	0.00459463	726.904	26.4584	0	0.899706	0.5	1	Null_Model_OpenChrom	human
TxnFactorChIPV3	HepG2	TCF12	188	142340	0.00132078	311.13	18.0611	0	0.604249	0.5	1	Null_Model_OpenChrom	human
TxnFactorChIPV3	HepG2	TCF7L2	161	142340	0.00113109	395.443	21.129	0	0.407139	0.5	1	Null_Model_OpenChrom	human
Cistrome_ChIP	CD4+	KAT8	391	142340	0.00274694	163.59	14.9304	0	2.39012	0.5	1	Null_Model_OpenChrom	human
TxnFactorChIPV3	GM12878	STAT1	567	142340	0.00398342	365.663	20.5712	0	1.55061	0.5	1	Null_Model_OpenChrom	human
Cistrome_ChIP	CD34+	TCF7L2	609	142340	0.00427849	1196.53	40.3027	0	0.508973	0.5	1	Null_Model_OpenChrom	human
TxnFactorChIPV3	HeLa-S3	GTF3C2	399	142340	0.00280315	298.34	17.8827	0	1.3374	0.5	1	Null_Model_OpenChrom	human
Cistrome_ChIP	CD34+	TAL1	178	142340	0.00125053	387.938	20.9544	0	0.458836	0.5	1	Null_Model_OpenChrom	human
Cistrome_ChIP	CD34+	NFE2	24	142340	0.00016861	41.2338	6.34345	0	0.582047	0.5	1	Null_Model_OpenChrom	human
Cistrome_ChIP	CD34+	LYL1	139	142340	0.000976535	281.826	16.9962	0	0.493212	0.5	1	Null_Model_OpenChrom	human
Cistrome_ChIP	EndothelialCell	EP300	230	142340	0.00161585	215.375	15.0662	0	1.06791	0.5	1	Null_Model_OpenChrom	human
TxnFactorChIPV3	K562	NR2C2	195	142340	0.00136996	112.007	10.79	0	1.74096	0.5	1	Null_Model_OpenChrom	human
TxnFactorChIPV3	H1-hESC	RXRA	490	142340	0.00344246	183.873	16.9084	0	2.66488	0.5	1	Null_Model_OpenChrom	human
TxnFactorChIPV3	K562	SMARCB1	319	142340	0.00224111	334.219	18.4244	0	0.954465	0.5	1	Null_Model_OpenChrom	human
TxnFactorChIPV3	H1-hESC	RFX5	459	142340	0.00322467	258.331	16.9026	0	1.77679	0.5	1	Null_Model_OpenChrom	human
TxnFactorChIPV3	K562	NFE2	270	142340	0.00189687	318.338	18.226	0	0.848156	0.5	1	Null_Model_OpenChrom	human
TxnFactorChIPV3	K562	BCL3	272	142340	0.00191092	240.989	15.9708	0	1.12868	0.5	1	Null_Model_OpenChrom	human
TxnFactorChIPV3	K562	SMARCA4	381	142340	0.00267669	429.272	20.9626	0	0.88755	0.5	1	Null_Model_OpenChrom	human
TxnFactorChIPV3	K562	BDP1	73	142340	0.000512857	70.3556	8.39806	0	1.03759	0.5	1	Null_Model_OpenChrom	human
Cistrome_ChIP	GM12878	ELK1	215	142340	0.00151047	95.9371	10.3369	0	2.24105	0.5	1	Null_Model_OpenChrom	human
TxnFactorChIPV3	K562	BRF2	71	142340	0.000498806	72.5994	8.53782	0	0.97797	0.5	1	Null_Model_OpenChrom	human
TxnFactorChIPV3	GM12878	ZBTB33	655	142340	0.00460166	398.36	20.771	0	1.64424	0.5	1	Null_Model_OpenChrom	human
TxnFactorChIPV3	K562+MNaseD	SETDB1	206	142340	0.00144724	180.104	13.9497	0	1.14378	0.5	1	Null_Model_OpenChrom	human
TxnFactorChIPV3	K562	BACH1	549	142340	0.00385696	493.195	21.8134	0	1.11315	0.5	1	Null_Model_OpenChrom	human
TxnFactorChIPV3	HeLa-S3	IRF3	392	142340	0.00275397	269.487	17.846	0	1.45462	0.5	1	Null_Model_OpenChrom	human
ReMap_ChIP	mcf10a	SNAPC1	307	142340	0.00215681	244.232	15.755	0	1.257	0.5	1	Null_Model_OpenChrom	human
ReMap_ChIP	786o	ARNT	452	142340	0.0031755	389.439	20.7016	0	1.16065	0.5	1	Null_Model_OpenChrom	human
ReMap_ChIP	hct116_normoxia	CDK8	301	142340	0.00211466	276.183	16.2649	0	1.08986	0.5	1	Null_Model_OpenChrom	human
ReMap_ChIP	hct116_hypoxia	CDK8	197	142340	0.00138401	234.203	15.149	0	0.841151	0.5	1	Null_Model_OpenChrom	human
ReMap_ChIP	h3396_etoh	ESR1	401	142340	0.0028172	245.881	16.3114	0	1.63087	0.5	1	Null_Model_OpenChrom	human
ReMap_ChIP	h3396_e2	RAC3	684	142340	0.0048054	493.5	23.3531	0	1.38602	0.5	1	Null_Model_OpenChrom	human
ReMap_ChIP	h3396_e2	ESR1	489	142340	0.00343544	441.209	20.4506	0	1.10832	0.5	1	Null_Model_OpenChrom	human
ReMap_ChIP	h2171	MBD4	185	142340	0.0012997	220.301	14.4052	0	0.839761	0.5	1	Null_Model_OpenChrom	human
ReMap_ChIP	germ_bcell	BCL6	275	142340	0.00193199	260.004	16.4649	0	1.05768	0.5	1	Null_Model_OpenChrom	human
Cistrome_ChIP	HEK293	BRD4	362	142340	0.00254321	530.693	22.8523	0	0.682127	0.5	1	Null_Model_OpenChrom	human
ReMap_ChIP	esc	RNF2	41	142340	0.000288043	78.1528	8.97528	0	0.524613	0.5	1	Null_Model_OpenChrom	human
ReMap_ChIP	esc	PRDM14	506	142340	0.00355487	444.466	21.3214	0	1.13845	0.5	1	Null_Model_OpenChrom	human
ReMap_ChIP	esc	MYC	621	142340	0.00436279	232.484	19.2578	0	2.67116	0.5	1	Null_Model_OpenChrom	human
ReMap_ChIP	esc	KLF4	141	142340	0.000990586	80.5884	9.16899	0	1.74963	0.5	1	Null_Model_OpenChrom	human
Misc_ChIP	BCells+Sendai_Virus	p65	177	142340	0.0012435	193.812	13.3836	0	0.913255	0.5	1	Null_Model_OpenChrom	human
ReMap_ChIP	erythroid	TAL1	475	142340	0.00333708	819.702	30.0109	0	0.579479	0.5	1	Null_Model_OpenChrom	human
ReMap_ChIP	endoderm	SMAD3	543	142340	0.00381481	930.482	32.3503	0	0.583569	0.5	1	Null_Model_OpenChrom	human
ReMap_ChIP	endoderm	SMAD2+3	457	142340	0.00321062	763.712	28.0054	0	0.598393	0.5	1	Null_Model_OpenChrom	human
ReMap_ChIP	cd4+tcell_p5d	BRD4	495	142340	0.00347759	308.486	18.4644	0	1.60461	0.5	1	Null_Model_OpenChrom	human
ReMap_ChIP	cd4+tcell_jq1_p5d	BRD4	654	142340	0.00459463	435.76	21.4144	0	1.50083	0.5	1	Null_Model_OpenChrom	human
ReMap_ChIP	cd4_il12	STAT5A	105	142340	0.00073767	104.323	10.2836	0	1.00649	0.5	1	Null_Model_OpenChrom	human
ReMap_ChIP	cd4_il12	STAT4	152	142340	0.00106787	203.086	14.2078	0	0.748452	0.5	1	Null_Model_OpenChrom	human
ReMap_ChIP	cd4_ifng	STAT1	553	142340	0.00388506	193.661	17.9833	0	2.8555	0.5	1	Null_Model_OpenChrom	human
Misc_ChIP	Jurkat	TAT	159	142340	0.00111704	140.364	11.1747	0	1.13277	0.5	1	Null_Model_OpenChrom	HIV
ReMap_ChIP	CD34_prog_bio	TCF7L2	52	142340	0.000365322	121.205	10.9122	0	0.429026	0.5	1	Null_Model_OpenChrom	human
Misc_ChIP	Kasumi-1_siRE	RUNX1-ETO	190	142340	0.00133483	176.148	13.0139	0	1.07864	0.5	1	Null_Model_OpenChrom	human
ReMap_ChIP	CD34_eryth_bmp	GATA1	282	142340	0.00198117	798.77	32.0492	0	0.353043	0.5	1	Null_Model_OpenChrom	human
ReMap_ChIP	CD34_eryth_bio	GATA1	415	142340	0.00291555	988.359	36.6156	0	0.419888	0.5	1	Null_Model_OpenChrom	human
ReMap_ChIP	caco2_prolif	GATA6	438	142340	0.00307714	1202.71	41.83	0	0.364178	0.5	1	Null_Model_OpenChrom	human
ReMap_ChIP	c42b_etoh	FOXA1	203	142340	0.00142616	589.021	27.1689	0	0.34464	0.5	1	Null_Model_OpenChrom	human
ReMap_ChIP	c42b_dht	FOXA1	490	142340	0.00344246	1088.85	36.9551	0	0.450016	0.5	1	Null_Model_OpenChrom	human
ReMap_ChIP	helab2_grkd_dmso	NR3C1	394	142340	0.00276802	190.951	14.8531	0	2.06336	0.5	1	Null_Model_OpenChrom	human
ReMap_ChIP	bt20	HSF1	128	142340	0.000899255	91.8991	9.72383	0	1.39283	0.5	1	Null_Model_OpenChrom	human
ReMap_ChIP	helab2_grkd_dmso	RELA	287	142340	0.0020163	123.86	12.0721	0	2.31713	0.5	1	Null_Model_OpenChrom	human
Pazar_Chip	CD34+prog	TCF7L2	645	142340	0.0045314	1178.67	38.1749	0	0.547225	0.5	1	Null_Model_OpenChrom	human
Cistrome_ChIP	T_Lymphocyte	STAT5	120	142340	0.000843052	84.3986	9.2517	0	1.42182	0.5	1	Null_Model_OpenChrom	human
Cistrome_ChIP	TT	TP63	503	142340	0.00353379	717.706	26.7818	0	0.700844	0.5	1	Null_Model_OpenChrom	human
ReMap_ChIP	k562_bmp4	SMAD1	338	142340	0.0023746	991.826	36.7642	0	0.340786	0.5	1	Null_Model_OpenChrom	human
ReMap_ChIP	k562_bio	TCF7L2	407	142340	0.00285935	561.606	24.461	0	0.724707	0.5	1	Null_Model_OpenChrom	human
Cistrome_ChIP	U2OS	TP53	251	142340	0.00176338	332.065	19.2481	0	0.755876	0.5	1	Null_Model_OpenChrom	human
Cistrome_ChIP	U87GM	EP300	71	142340	0.000498806	91.3946	9.66556	0	0.776851	0.5	1	Null_Model_OpenChrom	human
ReMap_ChIP	jurkat	TAL1	439	142340	0.00308416	748.976	31.0064	0	0.586134	0.5	1	Null_Model_OpenChrom	human
ReMap_ChIP	jurkat	RUNX1+3	36	142340	0.000252916	73.1169	8.71902	0	0.492362	0.5	1	Null_Model_OpenChrom	human
ReMap_ChIP	imr90	TP53	375	142340	0.00263454	184.699	14.4754	0	2.03033	0.5	1	Null_Model_OpenChrom	human
ReMap_ChIP	imr90_senescent_shluc	TP53	21	142340	0.000147534	43.2358	6.47861	0	0.485709	0.5	1	Null_Model_OpenChrom	human
ReMap_ChIP	imr90_senescent_ras_e2f7hairpin	E2F7	605	142340	0.00425039	462.182	22.1806	0	1.30901	0.5	1	Null_Model_OpenChrom	human
ReMap_ChIP	imr90_quiescent	E2F7	678	142340	0.00476324	661.651	25.8905	0	1.02471	0.5	1	Null_Model_OpenChrom	human
ReMap_ChIP	imr90h	SNAPC5	156	142340	0.00109597	106.62	10.1296	0	1.46313	0.5	1	Null_Model_OpenChrom	human
ReMap_ChIP	imr90h	SNAPC4	191	142340	0.00134186	148.864	12.2927	0	1.28305	0.5	1	Null_Model_OpenChrom	human
ReMap_ChIP	imr90h	SNAPC1	237	142340	0.00166503	170.218	13.4667	0	1.39233	0.5	1	Null_Model_OpenChrom	human
ReMap_ChIP	imr90h	BRF2	217	142340	0.00152452	135.889	11.7857	0	1.59689	0.5	1	Null_Model_OpenChrom	human
ReMap_ChIP	imr90_growing	E2F7	202	142340	0.00141914	132.123	11.3563	0	1.52888	0.5	1	Null_Model_OpenChrom	human
Cistrome_ChIP	VCaP+MDV3100_DHT	BRD4	695	142340	0.00488268	379.131	21.9144	0	1.83314	0.5	1	Null_Model_OpenChrom	human
ReMap_ChIP	huvec_statin	MEF2C	82	142340	0.000576085	93.0879	9.78306	0	0.880888	0.5	1	Null_Model_OpenChrom	human
ReMap_ChIP	huvec_dmso	MEF2C	37	142340	0.000259941	59.3506	7.64865	0	0.623414	0.5	1	Null_Model_OpenChrom	human
Misc_ChIP	Akata	BZLF1	246	142340	0.00172826	422.623	21.5007	0	0.582079	0.5	1	Null_Model_OpenChrom	EBV
ReMap_ChIP	hspc	IKZF1	199	142340	0.00139806	84.96	9.92685	0	2.34228	0.5	1	Null_Model_OpenChrom	human
Cistrome_ChIP	HaematopoieticProgenitorCell	IKZF1	354	142340	0.002487	135.379	13.8328	0	2.61489	0.5	1	Null_Model_OpenChrom	human
Misc_ChIP	BCells	p65	61	142340	0.000428551	65.1279	8.01883	0	0.936619	0.5	1	Null_Model_OpenChrom	human
ReMap_ChIP	hpball	ZNF143	396	142340	0.00278207	232.065	15.6225	0	1.70642	0.5	1	Null_Model_OpenChrom	human
Cistrome_ChIP	HCC95	TP63	355	142340	0.00249403	584.536	25.9431	0	0.607319	0.5	1	Null_Model_OpenChrom	human
ReMap_ChIP	hela_s3_s	SFMBT1	20	142340	0.000140509	14.3846	3.73697	0	1.39037	0.5	1	Null_Model_OpenChrom	human
ReMap_ChIP	hela_s3	ORC1	402	142340	0.00282422	214.656	15.854	0	1.87276	0.5	1	Null_Model_OpenChrom	human
ReMap_ChIP	hela_m	SMC4	104	142340	0.000730645	91.3566	9.81966	0	1.1384	0.5	1	Null_Model_OpenChrom	human
ReMap_ChIP	helab2_p65kd_dmso	RELA	444	142340	0.00311929	292.41	17.5751	0	1.51842	0.5	1	Null_Model_OpenChrom	human
ReMap_ChIP	blood_monocyte	CEBPB	416	142340	0.00292258	482.689	22.3046	0	0.861838	0.5	1	Null_Model_OpenChrom	human
ReMap_ChIP	bgo3	SMAD3	94	142340	0.000660391	168.358	13.1129	0	0.558335	0.5	1	Null_Model_OpenChrom	human
ReMap_ChIP	bcellp493-6_cmyc1hr	BRD4	265	142340	0.00186174	243.848	15.4836	0	1.08674	0.5	1	Null_Model_OpenChrom	human
Misc_ChIP	MutuIII	EBNA3C	550	142340	0.00386399	942.155	33.262	0	0.583768	0.5	1	Null_Model_OpenChrom	EBV
Misc_ChIP	Raji	EBNA1	20	142340	0.000140509	31.2048	5.2776	0	0.640927	0.5	1	Null_Model_OpenChrom	EBV
Pazar_Chip	BJ	TERF1	12	142340	8.43052e-05	24.4575	4.979	0	0.490646	0.5	1	Null_Model_OpenChrom	human
Pazar_Chip	BJ	TERF2	9	142340	6.32289e-05	21.9251	4.78554	0	0.410489	0.5	1	Null_Model_OpenChrom	human
Pazar_Chip	LN229	SOX2	97	142340	0.000681467	146.658	11.5743	0	0.661401	0.5	1	Null_Model_OpenChrom	human
Pazar_Chip	liver	FOXA2	494	142340	0.00347056	878.969	31.2705	0	0.562022	0.5	1	Null_Model_OpenChrom	human
Pazar_Chip	K562+rhBMP4	SMAD1	522	142340	0.00366728	1279.39	43.2241	0	0.408005	0.5	1	Null_Model_OpenChrom	human
Pazar_Chip	CD34+BIO	GATA1	628	142340	0.00441197	1302.48	41.6687	0	0.482155	0.5	1	Null_Model_OpenChrom	human
Pazar_Chip	K562+C	CEBPA	175	142340	0.00122945	136.286	11.8701	0	1.28407	0.5	1	Null_Model_OpenChrom	human
Pazar_Chip	K562+BMP4	GATA2	256	142340	0.00179851	635.563	28.3399	0	0.402792	0.5	1	Null_Model_OpenChrom	human
Pazar_Chip	K562+BMP4	GATA1	289	142340	0.00203035	1088.84	41.0516	0	0.26542	0.5	1	Null_Model_OpenChrom	human
Pazar_Chip	K562+BIO	TCF7L2	325	142340	0.00228327	588.158	25.3716	0	0.552573	0.5	1	Null_Model_OpenChrom	human
Pazar_Chip	CD34+eryth	GATA1	549	142340	0.00385696	1272.92	42.4834	0	0.431291	0.5	1	Null_Model_OpenChrom	human
Pazar_Chip	K562+BIO	GATA1	510	142340	0.00358297	1321.45	43.9114	0	0.385939	0.5	1	Null_Model_OpenChrom	human
Pazar_Chip	Jurkat	TAL1	125	142340	0.000878179	297.3	18.7359	0	0.420451	0.5	1	Null_Model_OpenChrom	human
Pazar_Chip	Jurkat	RUNX1	214	142340	0.00150344	329.658	18.202	0	0.649157	0.5	1	Null_Model_OpenChrom	human
Pazar_Chip	IMR90	TP53	244	142340	0.00171421	155.883	12.6775	0	1.56528	0.5	1	Null_Model_OpenChrom	human
Pazar_Chip	HUVEC	SMAD1	145	142340	0.00101869	118.735	10.7083	0	1.2212	0.5	1	Null_Model_OpenChrom	human
Pazar_Chip	HSPC	SPI1	106	142340	0.000744696	154.023	12.4107	0	0.688209	0.5	1	Null_Model_OpenChrom	human
Pazar_Chip	HSPC	MEIS1	33	142340	0.000231839	28.7572	5.49491	0	1.14754	0.5	1	Null_Model_OpenChrom	human
Pazar_Chip	hESC	SMAD3	493	142340	0.00346354	340.662	19.3082	0	1.44718	0.5	1	Null_Model_OpenChrom	human
Pazar_Chip	heart	NFKB1_p53	614	142340	0.00431362	629.468	25.7609	0	0.975428	0.5	1	Null_Model_OpenChrom	human
Pazar_Chip	erythroid	TAL1	367	142340	0.00257833	670.952	27.611	0	0.546984	0.5	1	Null_Model_OpenChrom	human
Pazar_Chip	endoderm	SMAD4	290	142340	0.00203738	415.93	21.3209	0	0.697233	0.5	1	Null_Model_OpenChrom	human
Pazar_Chip	endoderm	SMAD3	102	142340	0.000716594	211.105	15.1359	0	0.483172	0.5	1	Null_Model_OpenChrom	human
Pazar_Chip	endoderm	SMAD2-3	147	142340	0.00103274	267.822	17.0094	0	0.548872	0.5	1	Null_Model_OpenChrom	human
Pazar_Chip	CD34+eryth	SMAD1	110	142340	0.000772798	308.218	18.51	0	0.356891	0.5	1	Null_Model_OpenChrom	human
Pazar_Chip	DFB	IGF1R	5	142340	3.51272e-05	12.7153	3.63454	0	0.393228	0.5	1	Null_Model_OpenChrom	human
Pazar_Chip	CD40	TCF7L2	325	142340	0.00228327	587.798	25.969	0	0.552911	0.5	1	Null_Model_OpenChrom	human
Pazar_Chip	LNCaP	NKX31	226	142340	0.00158775	491.894	23.5208	0	0.459448	0.5	1	Null_Model_OpenChrom	human
Pazar_Chip	LS180	CDX2	381	142340	0.00267669	943.435	35.8109	0	0.403844	0.5	1	Null_Model_OpenChrom	human
Misc_ChIP	LoVo	ZNF236	245	142340	0.00172123	196.434	13.885	0	1.24724	0.5	1	Null_Model_OpenChrom	human
Pazar_Chip	LS180	RXR	143	142340	0.00100464	215.758	14.3782	0	0.662779	0.5	1	Null_Model_OpenChrom	human
TxnFactorChIPV3	GM12878	JUND	96	142340	0.000674441	342.191	20.0292	0	0.280545	0.5	1	Null_Model_OpenChrom	human
ReMap_ChIP	293trex	ZNF143	658	142340	0.00462273	461.588	22.3487	0	1.42551	0.5	1	Null_Model_OpenChrom	human
Pazar_Chip	U20S+5nM-Actinomycin-D	p53-pS15	76	142340	0.000533933	130.066	12.0491	0	0.584319	0.5	1	Null_Model_OpenChrom	human
Pazar_Chip	U20S+5nM-Actinomycin-D	P53	206	142340	0.00144724	250.929	15.9053	0	0.820949	0.5	1	Null_Model_OpenChrom	human
Pazar_Chip	U20S+10M-Etoposide	p53-pS46	28	142340	0.000196712	59.1289	7.93035	0	0.473542	0.5	1	Null_Model_OpenChrom	human
Pazar_Chip	U20S+10M-Etoposide	p53-pS15	78	142340	0.000547984	134.243	11.8944	0	0.581037	0.5	1	Null_Model_OpenChrom	human
Pazar_Chip	U20S+10M-Etoposide	P53	237	142340	0.00166503	372.75	19.668	0	0.635814	0.5	1	Null_Model_OpenChrom	human
Pazar_Chip	THP-1+unstimulated	VDR	450	142340	0.00316144	470.34	21.5011	0	0.956755	0.5	1	Null_Model_OpenChrom	human
Pazar_Chip	THP-1+stimulated	VDR	554	142340	0.00389209	691.046	27.0602	0	0.801683	0.5	1	Null_Model_OpenChrom	human
Pazar_Chip	THP-1	RXR	134	142340	0.000941408	232.875	15.4235	0	0.575416	0.5	1	Null_Model_OpenChrom	human
Pazar_Chip	THP-1	PPARG	567	142340	0.00398342	807.514	27.8724	0	0.702155	0.5	1	Null_Model_OpenChrom	human
Misc_ChIP	LoVo	HES2	307	142340	0.00215681	207.869	14.6862	0	1.47689	0.5	1	Null_Model_OpenChrom	human
Misc_ChIP	LoVo	HNF4A	639	142340	0.00448925	1028.25	34.5955	0	0.621444	0.5	1	Null_Model_OpenChrom	human
Pazar_Chip	PC3	ETS1	527	142340	0.0037024	399.414	20.1776	0	1.31943	0.5	1	Null_Model_OpenChrom	human
Cistrome_ChIP	H929	SPIB	114	142340	0.000800899	61.987	8.03074	0	1.83909	0.5	1	Null_Model_OpenChrom	human
Pazar_Chip	PASMC	SMAD1	508	142340	0.00356892	367.826	20.0334	0	1.38109	0.5	1	Null_Model_OpenChrom	human
Misc_ChIP	LoVo	IRX3	627	142340	0.00440495	529.864	24.2083	0	1.18332	0.5	1	Null_Model_OpenChrom	human
Pazar_Chip	megakaryocytes	GATA1	621	142340	0.00436279	663.773	26.9327	0	0.93556	0.5	1	Null_Model_OpenChrom	human
Pazar_Chip	MCF7	TFAP2C	127	142340	0.00089223	109.548	10.3143	0	1.1593	0.5	1	Null_Model_OpenChrom	human
Cistrome_ChIP	HeLa-S3	IRF3	292	142340	0.00205143	196.422	14.0749	0	1.4866	0.5	1	Null_Model_OpenChrom	human
Misc_ChIP	LoVo	NR2F2	277	142340	0.00194604	267.274	16.5863	0	1.03639	0.5	1	Null_Model_OpenChrom	human
Cistrome_ChIP	HeLa	YY1	293	142340	0.00205845	163.248	13.5009	0	1.79482	0.5	1	Null_Model_OpenChrom	human
Pazar_Chip	MCF7+estrogen	ER	457	142340	0.00321062	578.963	24.8604	0	0.789342	0.5	1	Null_Model_OpenChrom	human
Misc_ChIP	LoVo	TCF12	682	142340	0.00479134	554.756	23.2144	0	1.22937	0.5	1	Null_Model_OpenChrom	human
Pazar_Chip	LS180+Veh	TCF4	146	142340	0.00102571	247.346	16.8512	0	0.590267	0.5	1	Null_Model_OpenChrom	human
Pazar_Chip	LS180+Veh	RXR	68	142340	0.000477729	87.3077	9.24917	0	0.778855	0.5	1	Null_Model_OpenChrom	human
Misc_ChIP	LoVo	TCF7L2	312	142340	0.00219193	360.265	18.4121	0	0.86603	0.5	1	Null_Model_OpenChrom	human
Pazar_Chip	LS180+Veh	CDX2	366	142340	0.00257131	848.7	33.458	0	0.431248	0.5	1	Null_Model_OpenChrom	human
Pazar_Chip	LS180	VDR	115	142340	0.000807925	175.185	13.3352	0	0.65645	0.5	1	Null_Model_OpenChrom	human
Pazar_Chip	LS180	TCF4	158	142340	0.00111002	279.094	16.4152	0	0.566118	0.5	1	Null_Model_OpenChrom	human
Pazar_Chip	megakaryocytes	TAL1	319	142340	0.00224111	471.289	21.4826	0	0.676867	0.5	1	Null_Model_OpenChrom	human
ReMap_ChIP	lcl_dex	NFKB1	143	142340	0.00100464	165.106	12.9616	0	0.866111	0.5	1	Null_Model_OpenChrom	human
ReMap_ChIP	hela	GATAD1	202	142340	0.00141914	141.624	12.0812	0	1.42631	0.5	1	Null_Model_OpenChrom	human
ReMap_ChIP	lcl_etoh	NFKB1	159	142340	0.00111704	175.615	13.433	0	0.905388	0.5	1	Null_Model_OpenChrom	human
Cistrome_ChIP	Keratinocyte	TP63	211	142340	0.00148237	420.121	21.3291	0	0.502236	0.5	1	Null_Model_OpenChrom	human
ReMap_ChIP	mcf7	GREB1	519	142340	0.0036462	1085.32	37.674	0	0.4782	0.5	1	Null_Model_OpenChrom	human
Cistrome_ChIP	GM18526	RELA	444	142340	0.00311929	397.19	20.3757	0	1.11785	0.5	1	Null_Model_OpenChrom	human
Cistrome_ChIP	GM18505	RELA	445	142340	0.00312632	698.478	27.7143	0	0.6371	0.5	1	Null_Model_OpenChrom	human
Cistrome_ChIP	OCI-Ly10	BATF	665	142340	0.00467191	1001.14	32.9182	0	0.664242	0.5	1	Null_Model_OpenChrom	human
Cistrome_ChIP	Lymphocyte	STAT5A	221	142340	0.00155262	237.707	15.7456	0	0.929715	0.5	1	Null_Model_OpenChrom	human
TxnFactorChIPV3	ECC-1+BPA_100nM	ESR1	435	142340	0.00305606	609.355	24.7859	0	0.71387	0.5	1	Null_Model_OpenChrom	human
Cistrome_ChIP	OCI-Ly10	SPI1	303	142340	0.00212871	598.098	26.443	0	0.506606	0.5	1	Null_Model_OpenChrom	human
Cistrome_ChIP	OCI-Ly3	BATF	204	142340	0.00143319	331.62	18.1412	0	0.615161	0.5	1	Null_Model_OpenChrom	human
Cistrome_ChIP	KYSE-70	TP63	251	142340	0.00176338	326.13	18.4358	0	0.769632	0.5	1	Null_Model_OpenChrom	human
Cistrome_ChIP	K562	STAT2	187	142340	0.00131376	210.339	14.5221	0	0.889042	0.5	1	Null_Model_OpenChrom	human
Cistrome_ChIP	OCI-Ly3	IRF4	396	142340	0.00278207	497.273	21.1984	0	0.796344	0.5	1	Null_Model_OpenChrom	human
Cistrome_ChIP	K562	STAT1	104	142340	0.000730645	99.7473	10.0811	0	1.04264	0.5	1	Null_Model_OpenChrom	human
Cistrome_ChIP	OCI-Ly3+SCRM	IRF4	358	142340	0.0025151	652.969	27.9468	0	0.548265	0.5	1	Null_Model_OpenChrom	human
Cistrome_ChIP	OCI-Ly3	SPI1	80	142340	0.000562035	151.661	12.536	0	0.527491	0.5	1	Null_Model_OpenChrom	human
Cistrome_ChIP	H54	MYC	466	142340	0.00327385	205.649	16.8474	0	2.26599	0.5	1	Null_Model_OpenChrom	human
Cistrome_ChIP	GM12878	NFYA	183	142340	0.00128565	131.438	12.0144	0	1.3923	0.5	1	Null_Model_OpenChrom	human
TxnFactorChIPV3	GM12878	ATF3	693	142340	0.00486862	267.685	21.2758	0	2.58886	0.5	1	Null_Model_OpenChrom	human
ReMap_ChIP	mcf7	ARNT	251	142340	0.00176338	451.412	21.1593	0	0.556034	0.5	1	Null_Model_OpenChrom	human
ReMap_ChIP	mcf7	AHR	402	142340	0.00282422	794.823	30.9429	0	0.505773	0.5	1	Null_Model_OpenChrom	human
Cistrome_ChIP	GM12878	TP53	46	142340	0.00032317	97.022	10.1154	0	0.474119	0.5	1	Null_Model_OpenChrom	human
Cistrome_ChIP	LoVo	ELF2	184	142340	0.00129268	110.518	10.8882	0	1.66488	0.5	1	Null_Model_OpenChrom	human
Cistrome_ChIP	LoVo	EP300	43	142340	0.000302094	142.368	12.4036	0	0.302035	0.5	1	Null_Model_OpenChrom	human
TxnFactorChIPV3	A549+DEX_500pM	NR3C1	126	142340	0.000885204	171.823	13.2771	0	0.733312	0.5	1	Null_Model_OpenChrom	human
Cistrome_ChIP	Lymphocyte	STAT1	93	142340	0.000653365	72.2268	8.54831	0	1.28761	0.5	1	Null_Model_OpenChrom	human
Cistrome_ChIP	Lymphocyte	STAT5B	577	142340	0.00405367	839.263	30.0608	0	0.687508	0.5	1	Null_Model_OpenChrom	human
ReMap_ChIP	tall_prima2	TAL1	638	142340	0.00448223	518.767	22.6783	0	1.22984	0.5	1	Null_Model_OpenChrom	human
ReMap_ChIP	t47d_r60	NR3C3	70	142340	0.00049178	84.976	8.95876	0	0.823762	0.5	1	Null_Model_OpenChrom	human
ReMap_ChIP	t47d_r5	NR3C3	69	142340	0.000484755	67.004	8.2639	0	1.02979	0.5	1	Null_Model_OpenChrom	human
ReMap_ChIP	t47d_r360	NR3C3	56	142340	0.000393424	61.047	7.84059	0	0.917327	0.5	1	Null_Model_OpenChrom	human
ReMap_ChIP	t47d_r30	NR3C3	49	142340	0.000344246	50.3646	7.09647	0	0.972905	0.5	1	Null_Model_OpenChrom	human
Cistrome_ChIP	Megakaryocyte	FLI1	686	142340	0.00481945	397.671	21.3107	0	1.72504	0.5	1	Null_Model_OpenChrom	human
ReMap_ChIP	u937_bio	TCF7L2	393	142340	0.00276099	617.702	24.4478	0	0.636229	0.5	1	Null_Model_OpenChrom	human
Cistrome_ChIP	LoVo	TP73	491	142340	0.00344949	351.513	19.1521	0	1.39682	0.5	1	Null_Model_OpenChrom	human
ReMap_ChIP	vcap_dht18hr	ERG	681	142340	0.00478432	1461.36	46.1288	0	0.466003	0.5	1	Null_Model_OpenChrom	human
Cistrome_ChIP	LoVo	SP2	250	142340	0.00175636	167.021	12.4961	0	1.49682	0.5	1	Null_Model_OpenChrom	human
ReMap_ChIP	lcl_dex	NR3C1	202	142340	0.00141914	237.577	15.6151	0	0.850249	0.5	1	Null_Model_OpenChrom	human
Cistrome_ChIP	LoVo	SP1	525	142340	0.00368835	326.173	19.0279	0	1.60958	0.5	1	Null_Model_OpenChrom	human
Cistrome_ChIP	LoVo	ETV7	584	142340	0.00410285	420.623	21.2829	0	1.38842	0.5	1	Null_Model_OpenChrom	human
Cistrome_ChIP	Monocyte_CD14+	CEBPB	252	142340	0.00177041	264.232	16.1629	0	0.953708	0.5	1	Null_Model_OpenChrom	human
ReMap_ChIP	rwpe1	GABPA	658	142340	0.00462273	534.313	22.9553	0	1.23149	0.5	1	Null_Model_OpenChrom	human
ReMap_ChIP	plasma_jq1	CDK9	32	142340	0.000224814	23.7852	4.88148	0	1.34537	0.5	1	Null_Model_OpenChrom	human
ReMap_ChIP	plasma_jq1	BRD4	333	142340	0.00233947	133.638	13.244	0	2.4918	0.5	1	Null_Model_OpenChrom	human
ReMap_ChIP	pc3	JUND	522	142340	0.00366728	752.209	28.9307	0	0.693956	0.5	1	Null_Model_OpenChrom	human
TxnFactorChIPV3	A549+DEX_100nM	FOXA1	436	142340	0.00306309	865.594	32.3094	0	0.5037	0.5	1	Null_Model_OpenChrom	human
ReMap_ChIP	lymphoblastoid	E2F4	643	142340	0.00451735	234.765	20.4152	0	2.73891	0.5	1	Null_Model_OpenChrom	human
ReMap_ChIP	ls180_veh	VDR	11	142340	7.72798e-05	6.70529	2.60386	0	1.64049	0.5	1	Null_Model_OpenChrom	human
Cistrome_ChIP	GM12878	YY1	82	142340	0.000576085	89.1708	9.4579	0	0.919583	0.5	1	Null_Model_OpenChrom	human
ReMap_ChIP	lncap1f5_sifoxa1	FOXA1	605	142340	0.00425039	939.917	31.9107	0	0.643674	0.5	1	Null_Model_OpenChrom	human
ReMap_ChIP	lncap_dht	NKX3-1	495	142340	0.00347759	699.558	27.7527	0	0.707589	0.5	1	Null_Model_OpenChrom	human
TxnFactorChIPV3	GM12878	BRCA1	181	142340	0.0012716	98.8432	10.3161	0	1.83118	0.5	1	Null_Model_OpenChrom	human
Cistrome_ChIP	PC-3	ETV4	136	142340	0.000955459	300.875	17.9861	0	0.452015	0.5	1	Null_Model_OpenChrom	human
Cistrome_ChIP	Plasma	MAX	645	142340	0.0045314	309.191	20.4091	0	2.08609	0.5	1	Null_Model_OpenChrom	human
ReMap_ChIP	lncap1f5_sifoxa1	NR3C1	437	142340	0.00307011	772.319	29.8457	0	0.565829	0.5	1	Null_Model_OpenChrom	human
ReMap_ChIP	ls180_veh	TCF4	678	142340	0.00476324	672.114	24.5408	0	1.00876	0.5	1	Null_Model_OpenChrom	human
Cistrome_ChIP	Proerythroblast_CD34+	IRF2	167	142340	0.00117325	156.983	12.5011	0	1.06381	0.5	1	Null_Model_OpenChrom	human
ReMap_ChIP	lncap1f5	NR3C1	202	142340	0.00141914	495.532	24.0299	0	0.407642	0.5	1	Null_Model_OpenChrom	human
Cistrome_ChIP	K562	EP300	543	142340	0.00381481	527.081	22.3023	0	1.0302	0.5	1	Null_Model_OpenChrom	human
Cistrome_ChIP	IMR90	TP53	149	142340	0.00104679	90.2048	9.49489	0	1.6518	0.5	1	Null_Model_OpenChrom	human
ReMap_ChIP	lncap_1f5_dht+dex	AR	655	142340	0.00460166	1531.29	48.0577	0	0.427744	0.5	1	Null_Model_OpenChrom	human
ReMap_ChIP	lncap_1f5_dht	AR	132	142340	0.000927357	373.84	20.9248	0	0.353092	0.5	1	Null_Model_OpenChrom	human
Cistrome_ChIP	IMR90	RELA	63	142340	0.000442602	172.231	13.3883	0	0.365788	0.5	1	Null_Model_OpenChrom	human
ReMap_ChIP	lncap1f5	AR	349	142340	0.00245188	791.703	30.6014	0	0.440822	0.5	1	Null_Model_OpenChrom	human
TxnFactorChIPV3	GM12878	FOS	562	142340	0.00394829	366.699	20.2253	0	1.53259	0.5	1	Null_Model_OpenChrom	human
TxnFactorChIPV3	GM12878	IKZF1	521	142340	0.00366025	1479.67	49.0645	0	0.352106	0.5	1	Null_Model_OpenChrom	human
ReMap_ChIP	lclgm19193	NFKB1	49	142340	0.000344246	82.2038	9.07008	0	0.59608	0.5	1	Null_Model_OpenChrom	human
Cistrome_ChIP	THP-1	VDR	132	142340	0.000927357	115.06	10.8714	0	1.14723	0.5	1	Null_Model_OpenChrom	human
ReMap_ChIP	lcl_etoh	NR3C1	143	142340	0.00100464	173.053	13.0364	0	0.826337	0.5	1	Null_Model_OpenChrom	human
ReMap_ChIP	lncap_dht_sifoxa1	MED12	613	142340	0.00430659	209.847	19.3782	0	2.92117	0.5	1	Null_Model_OpenChrom	human
ReMap_ChIP	lncap_dht	TFAP4	254	142340	0.00178446	174.554	13.1102	0	1.45513	0.5	1	Null_Model_OpenChrom	human
Cistrome_ChIP	Lymphocyte	STAT4	67	142340	0.000470704	69.5684	8.29973	0	0.963081	0.5	1	Null_Model_OpenChrom	human
ReMap_ChIP	ls180_125	RXRA	600	142340	0.00421526	637.813	25.6111	0	0.940714	0.5	1	Null_Model_OpenChrom	human
Cistrome_ChIP	K562	SP1	314	142340	0.00220599	210.65	14.5467	0	1.49062	0.5	1	Null_Model_OpenChrom	human
ReMap_ChIP	ls180_125	VDR	225	142340	0.00158072	268.906	16.5788	0	0.836723	0.5	1	Null_Model_OpenChrom	human
Cistrome_ChIP	OCI-Ly3+SPIBKD	IRF4	29	142340	0.000203738	70.2577	8.62424	0	0.412766	0.5	1	Null_Model_OpenChrom	human
ReMap_ChIP	ls180_125	TCF4	613	142340	0.00430659	669.291	26.6461	0	0.915895	0.5	1	Null_Model_OpenChrom	human
Cistrome_ChIP	K562	SMAD1	608	142340	0.00427146	1506	48.0311	0	0.403719	0.5	1	Null_Model_OpenChrom	human
Cistrome_ChIP	K562	IRF1	415	142340	0.00291555	357.491	19.3552	0	1.16087	0.5	1	Null_Model_OpenChrom	human
ReMap_ChIP	ls180_veh	MBD4	175	142340	0.00122945	152.015	12.5383	0	1.1512	0.5	1	Null_Model_OpenChrom	human
ReMap_ChIP	ls180_veh	NCOA1	197	142340	0.00138401	185.356	13.6449	0	1.06282	0.5	1	Null_Model_OpenChrom	human
ReMap_ChIP	ls180_125	NCOA1	478	142340	0.00335816	408.578	20.3767	0	1.16991	0.5	1	Null_Model_OpenChrom	human
ReMap_ChIP	ls180_125	MBD4	601	142340	0.00422228	460.169	22.0953	0	1.30604	0.5	1	Null_Model_OpenChrom	human
Misc_ChIP	LoVo	H3	19564	142340	0.137446	19575.3	133.556	-0.084973	0.99942	0.533859	1	Null_Model_OpenChrom	human
ReMap_ChIP	sem	MEIS1	1422	142340	0.00999016	1427.06	36.2637	-0.13967	0.996451	0.55554	1	Null_Model_OpenChrom	human
TxnFactorChIPV3	GM12878	STAT3	1047	142340	0.00735563	1052.59	31.9195	-0.174984	0.994694	0.569454	1	Null_Model_OpenChrom	human
Cistrome_ChIP	K562	STAT5A	1967	142340	0.013819	1975.14	45.0414	-0.180742	0.995878	0.571715	1	Null_Model_OpenChrom	human
TxnFactorChIPV3	A549+EtOH_0.02pct	BCL3	1452	142340	0.0102009	1460.12	38.6036	-0.210443	0.994436	0.583339	1	Null_Model_OpenChrom	human
ReMap_ChIP	t47d_e2	FOXA1	1088	142340	0.00764367	1095.83	33.5125	-0.23362	0.992855	0.59236	1	Null_Model_OpenChrom	human
TxnFactorChIPV3	HMEC	EZH2	1726	142340	0.0121259	1741.35	40.8577	-0.375588	0.991187	0.646388	1	Null_Model_OpenChrom	human
Pazar_Chip	hESC	FOXH1	1026	142340	0.00720809	1040.21	31.4707	-0.451461	0.986341	0.674171	1	Null_Model_OpenChrom	human
Cistrome_ChIP	GM18951	RELA	758	142340	0.00532528	773.509	27.8558	-0.556777	0.979949	0.71116	1	Null_Model_OpenChrom	human
Misc_ChIP	LoVo	ATF1	2550	142340	0.0179149	2579.74	50.838	-0.584902	0.988474	0.720693	1	Null_Model_OpenChrom	human
Pazar_Chip	MCF7	PBX1	7023	142340	0.0493396	7078.16	82.219	-0.670865	0.992207	0.748847	1	Null_Model_OpenChrom	human
TxnFactorChIPV3	HepG2	MAFF	2033	142340	0.0142827	2070.23	45.4352	-0.819447	0.982016	0.793734	1	Null_Model_OpenChrom	human
Misc_ChIP	BCells+Sendai_Virus	IRF3	1241	142340	0.00871856	1271.43	34.9841	-0.869955	0.976063	0.807838	1	Null_Model_OpenChrom	human
Pazar_Chip	hESC	SMAD2-3	1218	142340	0.00855698	1249.41	35.1467	-0.893585	0.974863	0.814228	1	Null_Model_OpenChrom	human
TxnFactorChIPV3	ECC-1+DMSO_0.02pct	FOXA1	755	142340	0.0053042	781.303	27.3087	-0.963162	0.966335	0.832267	1	Null_Model_OpenChrom	human
Misc_ChIP	LoVo	EGR1	4329	142340	0.0304131	4393.09	65.8357	-0.973514	0.985411	0.834851	1	Null_Model_OpenChrom	human
Pazar_Chip	VCaP	AR	8437	142340	0.0592736	8530.44	87.4136	-1.06889	0.989047	0.857441	1	Null_Model_OpenChrom	human
Misc_ChIP	LoVo	JUND	16631	142340	0.11684	16762.1	118.311	-1.10812	0.992179	0.866094	1	Null_Model_OpenChrom	human
Cistrome_ChIP	HL-60	SPI1	7640	142340	0.0536743	7759.09	84.9358	-1.40209	0.984652	0.919556	1	Null_Model_OpenChrom	human
TxnFactorChIPV3	H1-hESC	EZH2	1950	142340	0.0136996	2012.74	44.714	-1.40306	0.96883	0.9197	1	Null_Model_OpenChrom	human
TxnFactorChIPV3	GM12878	EZH2	921	142340	0.00647042	965.8	31.0872	-1.44111	0.953613	0.925224	1	Null_Model_OpenChrom	human
Misc_ChIP	LoVo	CAMTA2	2489	142340	0.0174863	2569.65	50.927	-1.58361	0.968615	0.943359	1	Null_Model_OpenChrom	human
ReMap_ChIP	u2os_notreated	ESR2	717	142340	0.00503723	763.153	27.8583	-1.6567	0.939523	0.95121	1	Null_Model_OpenChrom	human
Pazar_Chip	HepG2	HNF4A	4060	142340	0.0285233	4167.13	63.1343	-1.69684	0.974292	0.955137	1	Null_Model_OpenChrom	human
ReMap_ChIP	sem	RUNX1	9846	142340	0.0691724	10022.7	99.481	-1.77604	0.982372	0.962137	1	Null_Model_OpenChrom	human
Pazar_Chip	U937+BIO	TCF7L2	729	142340	0.00512154	779.472	28.3571	-1.77986	0.935249	0.96245	1	Null_Model_OpenChrom	human
Misc_ChIP	LoVo	GATA1	957	142340	0.00672334	1016.94	32.5527	-1.8412	0.941062	0.967204	1	Null_Model_OpenChrom	human
Cistrome_ChIP	Epithelial	RELA	2042	142340	0.0143459	2134.02	47.2098	-1.94915	0.95688	0.974361	1	Null_Model_OpenChrom	human
Cistrome_ChIP	HeLa	RELA	2042	142340	0.0143459	2134.28	47.2594	-1.9527	0.956761	0.974573	1	Null_Model_OpenChrom	human
TxnFactorChIPV3	MCF10A-Er-Src+4OHTAM_1uM_4hr	MYC	3907	142340	0.0274484	4041.79	62.9	-2.14286	0.966652	0.983938	1	Null_Model_OpenChrom	human
ReMap_ChIP	helab2_wt_ta	NR3C1	1027	142340	0.00721512	1103.5	33.4457	-2.28718	0.930678	0.988907	1	Null_Model_OpenChrom	human
TxnFactorChIPV3	HepG2	JUND	4882	142340	0.0342982	5048.79	72.7043	-2.29415	0.966964	0.989109	1	Null_Model_OpenChrom	human
TxnFactorChIPV3	K562	FOS	1973	142340	0.0138612	2080.06	45.979	-2.32854	0.948529	0.990058	1	Null_Model_OpenChrom	human
ReMap_ChIP	lclgm12891	NFKB1	4688	142340	0.0329352	4850.45	69.3762	-2.34163	0.966508	0.9904	1	Null_Model_OpenChrom	human
Misc_ChIP	LoVo	EVI1	9880	142340	0.0694113	10114.3	94.9231	-2.4679	0.976839	0.993205	1	Null_Model_OpenChrom	human
TxnFactorChIPV3	A549	CEBPB	3577	142340	0.02513	3728.87	60.152	-2.52472	0.959273	0.994211	1	Null_Model_OpenChrom	human
TxnFactorChIPV3	HepG2	MBD4	949	142340	0.00666714	1032.53	32.2504	-2.59009	0.9191	0.995202	1	Null_Model_OpenChrom	human
TxnFactorChIPV3	H1-hESC	SUZ12	722	142340	0.00507236	795.129	27.7659	-2.63377	0.908029	0.995778	1	Null_Model_OpenChrom	human
Misc_ChIP	LoVo	LHX2	2625	142340	0.0184418	2761.84	51.651	-2.64932	0.950453	0.995967	1	Null_Model_OpenChrom	human
TxnFactorChIPV3	K562	JUNB	1699	142340	0.0119362	1806.7	40.4126	-2.66494	0.94039	0.99615	1	Null_Model_OpenChrom	human
ReMap_ChIP	caco2_prolif	HNF4A	2085	142340	0.014648	2215.03	47.7461	-2.72332	0.941297	0.996769	1	Null_Model_OpenChrom	human
Misc_ChIP	Kasumi-1	RUNX1	1975	142340	0.0138752	2102.35	46.0888	-2.76312	0.939426	0.997137	1	Null_Model_OpenChrom	human
TxnFactorChIPV3	HSMM	EZH2	824	142340	0.00578896	909.757	30.425	-2.81864	0.905736	0.997589	1	Null_Model_OpenChrom	human
ReMap_ChIP	ls180_125	CEBPB	9028	142340	0.0634256	9289.88	92.3903	-2.83447	0.97181	0.997705	1	Null_Model_OpenChrom	human
ReMap_ChIP	caco2_diff	HNF4A	4308	142340	0.0302656	4505.18	65.0177	-3.03265	0.956233	0.998788	1	Null_Model_OpenChrom	human
Misc_ChIP	LoVo	ATF5	4332	142340	0.0304342	4542.22	66.4938	-3.16156	0.953718	0.999215	1	Null_Model_OpenChrom	human
Cistrome_ChIP	DendriticCell	TCF4	1648	142340	0.0115779	1783.75	42.8477	-3.1683	0.923894	0.999233	1	Null_Model_OpenChrom	human
TxnFactorChIPV3	HepG2	TEAD4	2052	142340	0.0144162	2201.27	45.6213	-3.27202	0.932188	0.999466	1	Null_Model_OpenChrom	human
Misc_ChIP	LoVo	NFYA	1398	142340	0.00982155	1524.36	38.3502	-3.29502	0.917103	0.999508	1	Null_Model_OpenChrom	human
TxnFactorChIPV3	K562	MAFK	1557	142340	0.0109386	1701.34	41.3045	-3.49448	0.915162	0.999763	1	Null_Model_OpenChrom	human
Misc_ChIP	LoVo	DLX1	9503	142340	0.0667627	9872.44	101.097	-3.65433	0.962578	0.999871	1	Null_Model_OpenChrom	human
TxnFactorChIPV3	K562	FOSL1	1235	142340	0.00867641	1380.41	38.0388	-3.82271	0.894661	0.999934	1	Null_Model_OpenChrom	human
Cistrome_ChIP	PBMC	STAT4	4731	142340	0.0332373	5003.23	70.1022	-3.88335	0.945589	0.999948	1	Null_Model_OpenChrom	human
Cistrome_ChIP	GM12878	BATF	7505	142340	0.0527259	7837.82	84.5219	-3.9377	0.957536	0.999959	1	Null_Model_OpenChrom	human
Cistrome_ChIP	NB4	EP300	1886	142340	0.01325	2079.84	45.6426	-4.24689	0.906801	0.999989	1	Null_Model_OpenChrom	human
Pazar_Chip	H1	NANOG	2314	142340	0.0162568	2525.83	48.8475	-4.33654	0.916135	0.999993	1	Null_Model_OpenChrom	human
TxnFactorChIPV3	PBDE	GATA1	2913	142340	0.0204651	3167.74	56.2696	-4.52716	0.919583	0.999997	1	Null_Model_OpenChrom	human
ReMap_ChIP	nci_h3122	NKX2-1	4449	142340	0.0312561	4787.57	73.22	-4.624	0.929282	0.999998	1	Null_Model_OpenChrom	human
ReMap_ChIP	asc	PPARG	5341	142340	0.0375228	5700.6	74.7037	-4.81362	0.93692	0.999999	1	Null_Model_OpenChrom	human
Misc_ChIP	LoVo	CEBPB	7436	142340	0.0522411	7863.57	91.3508	-4.68048	0.945627	0.999999	1	Null_Model_OpenChrom	human
ReMap_ChIP	endoderm	SMAD4	1150	142340	0.00807925	1329.57	37.7701	-4.75438	0.864939	0.999999	1	Null_Model_OpenChrom	human
Pazar_Chip	U20S	ESR2	714	142340	0.00501616	855.738	29.709	-4.77089	0.834367	0.999999	1	Null_Model_OpenChrom	human
Misc_ChIP	LoVo	H3K4me1	3806	142340	0.0267388	6596.16	117.825	-23.6804	0.577002	1	1	Null_Model_OpenChrom	human
Cistrome_ChIP	OCI-Ly3	SPIB	1902	142340	0.0133624	2433.78	52.192	-10.189	0.7815	1	1	Null_Model_OpenChrom	human
TxnFactorChIPV3	MCF10A-Er-Src+4OHTAM_1uM_4hr	FOS	4623	142340	0.0324786	10300.7	206.024	-27.5586	0.448803	1	1	Null_Model_OpenChrom	human
Cistrome_ChIP	K562	SPI1	3026	142340	0.021259	3308.08	56.3737	-5.00384	0.914729	1	1	Null_Model_OpenChrom	human
TxnFactorChIPV3	MCF10A-Er-Src+4OHTAM_1uM_36hr	STAT3	3780	142340	0.0265561	5676.17	93.599	-20.2584	0.665942	1	1	Null_Model_OpenChrom	human
TxnFactorChIPV3	T-47D+DMSO_0.02pct	EP300	1804	142340	0.0126739	2073.6	46.6276	-5.78204	0.869984	1	1	Null_Model_OpenChrom	human
Misc_ChIP	BCells+Sendai_Virus	MED1	860	142340	0.00604187	1045.11	31.8236	-5.81675	0.82288	1	1	Null_Model_OpenChrom	human
TxnFactorChIPV3	MCF10A-Er-Src+4OHTAM_1uM_36hr	FOS	4101	142340	0.0288113	8433.09	163.019	-26.5741	0.486299	1	1	Null_Model_OpenChrom	human
TxnFactorChIPV3	NHEK	POLR2A	1967	142340	0.013819	2201.32	46.8471	-5.0018	0.893555	1	1	Null_Model_OpenChrom	human
TxnFactorChIPV3	MCF10A-Er-Src+4OHTAM_1uM_12hr	STAT3	2919	142340	0.0205072	5188.02	101.382	-22.3808	0.562643	1	1	Null_Model_OpenChrom	human
TxnFactorChIPV3	MCF10A-Er-Src+4OHTAM_1uM_12hr	FOS	5109	142340	0.0358929	10910.7	210.415	-27.5728	0.468255	1	1	Null_Model_OpenChrom	human
Cistrome_ChIP	OCI-Ly10	IRF4	739	142340	0.00519179	1017.66	33.1084	-8.41663	0.726175	1	1	Null_Model_OpenChrom	human
TxnFactorChIPV3	MCF10A-Er-Src+EtOH_0.01pct_12hr	STAT3	3041	142340	0.0213643	5366.37	101.611	-22.885	0.566677	1	1	Null_Model_OpenChrom	human
TxnFactorChIPV3	MCF10A-Er-Src+EtOH_0.01pct_4hr	STAT3	3335	142340	0.0234298	5825.35	107.897	-23.0809	0.572498	1	1	Null_Model_OpenChrom	human
Misc_ChIP	BCells	Pol_II	7608	142340	0.0534495	10463.4	130.81	-21.8287	0.727106	1	1	Null_Model_OpenChrom	human
Misc_ChIP	BCells+Sendai_Virus	Pol_II	9693	142340	0.0680975	13328.7	158.127	-22.9924	0.727227	1	1	Null_Model_OpenChrom	human
TxnFactorChIPV3	MCF10A-Er-Src+EtOH_0.01pct	STAT3	1284	142340	0.00902065	1776.85	44.6466	-11.039	0.722626	1	1	Null_Model_OpenChrom	human
Misc_ChIP	BCells	MED1	881	142340	0.00618941	1067.64	33.8385	-5.51547	0.825188	1	1	Null_Model_OpenChrom	human
Cistrome_ChIP	A549	SMAD3	1101	142340	0.007735	1788.78	48.2027	-14.2684	0.615505	1	1	Null_Model_OpenChrom	human
TxnFactorChIPV3	K562	MAFF	1642	142340	0.0115358	1919.8	45.3671	-6.12336	0.855298	1	1	Null_Model_OpenChrom	human
TxnFactorChIPV3	MCF-7	GATA3	948	142340	0.00666011	1792.74	50.3471	-16.7783	0.5288	1	1	Null_Model_OpenChrom	human
Cistrome_ChIP	Saos-2	TP73	873	142340	0.0061332	1764.27	50.1165	-17.7839	0.494823	1	1	Null_Model_OpenChrom	human
TxnFactorChIPV3	MCF-7	ZNF217	828	142340	0.00581706	1469.67	44.2445	-14.5028	0.563392	1	1	Null_Model_OpenChrom	human
Cistrome_ChIP	SK-N-SH	EP300	3630	142340	0.0255023	5280.08	88.5948	-18.625	0.68749	1	1	Null_Model_OpenChrom	human
Cistrome_ChIP	U937	SMAD1	1768	142340	0.012421	4661.89	113.962	-25.3936	0.379245	1	1	Null_Model_OpenChrom	human
Cistrome_ChIP	IMR90	EP300	4323	142340	0.0303709	4735.89	69.6442	-5.92854	0.912817	1	1	Null_Model_OpenChrom	human
Cistrome_ChIP	Th1	TBX21	734	142340	0.00515667	1113.88	36.1193	-10.5174	0.658957	1	1	Null_Model_OpenChrom	human
TxnFactorChIPV3	MCF-7	TCF7L2	1232	142340	0.00865533	1646.41	41.803	-9.9133	0.748297	1	1	Null_Model_OpenChrom	human
Cistrome_ChIP	Th2	GATA3	1105	142340	0.0077631	1435.82	39.8158	-8.30882	0.769594	1	1	Null_Model_OpenChrom	human
TxnFactorChIPV3	MCF10A-Er-Src+EtOH_0.01pct	FOS	3835	142340	0.0269425	8361.51	166.792	-27.1387	0.458649	1	1	Null_Model_OpenChrom	human
Pazar_Chip	Caco-2_proliferating	GATA6	6235	142340	0.0438036	7570.26	95.6888	-13.9542	0.823617	1	1	Null_Model_OpenChrom	human
Cistrome_ChIP	NCI-H441	SMAD3	5811	142340	0.0408248	6995.47	87.7283	-13.5015	0.830681	1	1	Null_Model_OpenChrom	human
Cistrome_ChIP	NCI-H441	SMAD4	720	142340	0.00505831	1240.02	37.9568	-13.7003	0.580636	1	1	Null_Model_OpenChrom	human
Cistrome_ChIP	MCF-10A	STAT3	8393	142340	0.0589645	10058.3	110.52	-15.0679	0.834434	1	1	Null_Model_OpenChrom	human
Cistrome_ChIP	LX2	VDR	3176	142340	0.0223128	3555.87	61.2445	-6.20245	0.893172	1	1	Null_Model_OpenChrom	human
Cistrome_ChIP	LX2	SMAD3	1297	142340	0.00911199	3253.38	82.1425	-23.8169	0.398662	1	1	Null_Model_OpenChrom	human
Artem-ChIP	Naive_CD4_T_cells+EI12h	FOS	1033	142340	0.00725727	1678.09	46.2768	-13.9398	0.61558	1	1	Null_Model_OpenChrom	human
Cistrome_ChIP	MCF-7	EP300	875	142340	0.00614725	1969.26	55.0993	-19.8597	0.44433	1	1	Null_Model_OpenChrom	human
Misc_ChIP	LoVo	ERM	3841	142340	0.0269847	4535.61	68.8411	-10.0901	0.846854	1	1	Null_Model_OpenChrom	human
TxnFactorChIPV3	SH-SY5Y	GATA2	3406	142340	0.0239286	4057.17	67.7269	-9.6147	0.839501	1	1	Null_Model_OpenChrom	human
Misc_ChIP	LoVo	E2F2	7077	142340	0.049719	8174.91	94.1005	-11.6674	0.865698	1	1	Null_Model_OpenChrom	human
Cistrome_ChIP	HepG2	EP300	2796	142340	0.0196431	3917.52	70.0049	-16.0205	0.713717	1	1	Null_Model_OpenChrom	human
Misc_ChIP	LoVo	CLOCK	6563	142340	0.0461079	7453.64	86.8211	-10.2583	0.88051	1	1	Null_Model_OpenChrom	human
TxnFactorChIPV3	SH-SY5Y	GATA3	861	142340	0.0060489	1420.84	42.6064	-13.1397	0.605981	1	1	Null_Model_OpenChrom	human
TxnFactorChIPV3	K562	STAT5A	1118	142340	0.00785443	1298.56	35.5147	-5.08422	0.860951	1	1	Null_Model_OpenChrom	human
Cistrome_ChIP	HeLa-S3	STAT3	1202	142340	0.00844457	2243.65	57.0897	-18.2458	0.535735	1	1	Null_Model_OpenChrom	human
TxnFactorChIPV3	K562	TAL1	1951	142340	0.0137066	2640.81	55.5894	-12.409	0.738789	1	1	Null_Model_OpenChrom	human
Pazar_Chip	Caco-2_differentiated	GATA6	5068	142340	0.0356049	5768.49	77.0353	-9.09308	0.878566	1	1	Null_Model_OpenChrom	human
Cistrome_ChIP	HepG2	SP1	4231	142340	0.0297246	4660.35	69.5383	-6.17436	0.907871	1	1	Null_Model_OpenChrom	human
TxnFactorChIPV3	SK-N-SH_RA	EP300	3892	142340	0.027343	5815.02	95.2274	-20.194	0.669301	1	1	Null_Model_OpenChrom	human
Misc_ChIP	Kasumi-1_siRE	RUNX1	972	142340	0.00682872	1507.76	42.4085	-12.6334	0.644664	1	1	Null_Model_OpenChrom	human
Artem-ChIP	Naive_CD4_Tcell_EI_5h_3	NFATC1	1229	142340	0.00863426	1463.97	39.1859	-5.99617	0.839501	1	1	Null_Model_OpenChrom	human
Misc_ChIP	Kasumi-1_siMM	RUNX1-ETO	1357	142340	0.00953351	1648.51	40.3312	-7.22784	0.823169	1	1	Null_Model_OpenChrom	human
Misc_ChIP	MutuIII	EBNA2	4516	142340	0.0317269	5512.01	77.8981	-12.7861	0.819301	1	1	Null_Model_OpenChrom	EBV
Misc_ChIP	Kasumi-1_siMM	RUNX1	881	142340	0.00618941	1107.2	34.5615	-6.54499	0.795697	1	1	Null_Model_OpenChrom	human
Misc_ChIP	Kasumi-1	RUNX1-ETO	1469	142340	0.0103204	1677.01	40.1615	-5.17944	0.875962	1	1	Null_Model_OpenChrom	human
Cistrome_ChIP	NB4	FLI1	1245	142340	0.00874666	1811.08	47.347	-11.9561	0.687433	1	1	Null_Model_OpenChrom	human
Pazar_Chip	adipocyte	PPARg	1421	142340	0.00998314	2132.99	52.1342	-13.6568	0.666202	1	1	Null_Model_OpenChrom	human
Misc_ChIP	IB4	RBPJ	1434	142340	0.0100745	2203.3	54.2831	-14.172	0.650841	1	1	Null_Model_OpenChrom	human
Misc_ChIP	IB4	EBNA2	838	142340	0.00588731	1298.99	38.2161	-12.0626	0.645119	1	1	Null_Model_OpenChrom	EBV
Cistrome_ChIP	CD133+	SPI1	1229	142340	0.00863426	1550.61	40.6083	-7.9198	0.792592	1	1	Null_Model_OpenChrom	human
Misc_ChIP	CD34+	RUNX1	3454	142340	0.0242658	4632.29	74.6598	-15.7821	0.745635	1	1	Null_Model_OpenChrom	human
Misc_ChIP	LoVo	HOXA2	1095	142340	0.00769285	1555.17	41.5444	-11.0765	0.704105	1	1	Null_Model_OpenChrom	human
Cistrome_ChIP	Monocyte_CD14+	IRF1	1998	142340	0.0140368	2452.68	53.0288	-8.57426	0.814618	1	1	Null_Model_OpenChrom	human
Pazar_Chip	CD34+prog	GATA2	2232	142340	0.0156808	3278.34	65.1935	-16.0498	0.680832	1	1	Null_Model_OpenChrom	human
TxnFactorChIPV3	GM12878	MTA3	1912	142340	0.0134326	2262.88	48.4065	-7.24855	0.844942	1	1	Null_Model_OpenChrom	human
Pazar_Chip	endoderm	FOXH1	1712	142340	0.0120275	2377.49	54.8834	-12.1256	0.720086	1	1	Null_Model_OpenChrom	human
ReMap_ChIP	mcf7_dmso	GATA3	1314	142340	0.00923142	1665.23	41.6277	-8.4374	0.78908	1	1	Null_Model_OpenChrom	human
ReMap_ChIP	mcf7_e2	ESR1	5195	142340	0.0364971	7940.18	122.46	-22.417	0.654267	1	1	Null_Model_OpenChrom	human
ReMap_ChIP	mcf7_e2	FOXA1	4686	142340	0.0329212	5828.82	80.1828	-14.2527	0.803936	1	1	Null_Model_OpenChrom	human
ReMap_ChIP	mcf7_e2	GATA3	2727	142340	0.0191584	3694.14	67.12	-14.4091	0.738197	1	1	Null_Model_OpenChrom	human
ReMap_ChIP	mcf7	ESR1	3883	142340	0.0272798	6495.59	114.774	-22.7628	0.59779	1	1	Null_Model_OpenChrom	human
ReMap_ChIP	mcf7_etoh	FOXA1	4582	142340	0.0321905	5510.87	80.7547	-11.5024	0.831447	1	1	Null_Model_OpenChrom	human
ReMap_ChIP	ls180_veh	CDX2	2712	142340	0.019053	3069.25	53.7516	-6.64638	0.883602	1	1	Null_Model_OpenChrom	human
ReMap_ChIP	mcf7	FOXA1	2558	142340	0.0179711	3393.93	65.3506	-12.7914	0.753699	1	1	Null_Model_OpenChrom	human
ReMap_ChIP	mcf7_gatakd_veh	FOXA1	6832	142340	0.0479978	8084.83	95.1223	-13.1707	0.845039	1	1	Null_Model_OpenChrom	human
ReMap_ChIP	mcf7_veh	FOXA1	6850	142340	0.0481242	7876.46	89.6431	-11.4506	0.86968	1	1	Null_Model_OpenChrom	human
ReMap_ChIP	nb4_leukemic	FLI1	2116	142340	0.0148658	2820.21	57.6086	-12.2241	0.750297	1	1	Null_Model_OpenChrom	human
ReMap_ChIP	nci_h3122	FOXA1	3375	142340	0.0237108	4493.76	76.8533	-14.5571	0.751041	1	1	Null_Model_OpenChrom	human
TxnFactorChIPV3	GM19193+TNFa	RELA	758	142340	0.00532528	961.294	32.78	-6.20177	0.788521	1	1	Null_Model_OpenChrom	human
TxnFactorChIPV3	GM19099+TNFa	RELA	1213	142340	0.00852185	1415.68	39.7381	-5.10038	0.856832	1	1	Null_Model_OpenChrom	human
ReMap_ChIP	mcf7_gatakd_e2	ESR1	4017	142340	0.0282212	6507.95	112.11	-22.2188	0.617245	1	1	Null_Model_OpenChrom	human
ReMap_ChIP	saos	TAp73a	1377	142340	0.00967402	2659.28	64.4846	-19.885	0.51781	1	1	Null_Model_OpenChrom	human
ReMap_ChIP	lncap_etoh	FOXA1	3510	142340	0.0246593	5144.23	86.9374	-18.7978	0.682318	1	1	Null_Model_OpenChrom	human
ReMap_ChIP	lncap_dht	FOXA1	2277	142340	0.0159969	4062.53	85.2556	-20.9432	0.560488	1	1	Null_Model_OpenChrom	human
ReMap_ChIP	k562_bio	GATA2	1128	142340	0.00792469	2012.89	50.5223	-17.5148	0.560389	1	1	Null_Model_OpenChrom	human
TxnFactorChIPV3	HEK293	TCF7L2	1122	142340	0.00788253	1335.98	36.7602	-5.82103	0.839832	1	1	Null_Model_OpenChrom	human
ReMap_ChIP	k562_bmp	GATA2	1177	142340	0.00826893	1663.78	42.6515	-11.4129	0.707427	1	1	Null_Model_OpenChrom	human
ReMap_ChIP	keratinocyte	TP63	3043	142340	0.0213784	5392.76	101.929	-23.053	0.564275	1	1	Null_Model_OpenChrom	human
ReMap_ChIP	lclgm12878	NFKB1	3652	142340	0.0256569	4266.8	68.0531	-9.03417	0.85591	1	1	Null_Model_OpenChrom	human
ReMap_ChIP	leiomyoma_ru486	NR3C3	1825	142340	0.0128214	3189.38	69.9109	-19.5159	0.572212	1	1	Null_Model_OpenChrom	human
ReMap_ChIP	lncap_etoh	AR	1422	142340	0.00999016	2336.73	55.7831	-16.398	0.608542	1	1	Null_Model_OpenChrom	human
ReMap_ChIP	liver	CEBPA	4461	142340	0.0313405	4835.16	70.4391	-5.31181	0.922617	1	1	Null_Model_OpenChrom	human
ReMap_ChIP	lncap_1f5_dex	NR3C1	881	142340	0.00618941	1617.67	46.0093	-16.0112	0.544612	1	1	Null_Model_OpenChrom	human
ReMap_ChIP	lncap_1f5_dht+dex	NR3C1	1552	142340	0.0109035	2517.3	58.1587	-16.5978	0.616532	1	1	Null_Model_OpenChrom	human
ReMap_ChIP	lncap1f5	FOXA1	2572	142340	0.0180694	3069.24	58.9597	-8.43359	0.837992	1	1	Null_Model_OpenChrom	human
ReMap_ChIP	lncap1f5_sifoxa1	AR	728	142340	0.00511451	1386.91	42.0768	-15.6596	0.524909	1	1	Null_Model_OpenChrom	human
ReMap_ChIP	lncap_c4_2b	RUNX2	2527	142340	0.0177533	4216.73	82.651	-20.4441	0.59928	1	1	Null_Model_OpenChrom	human
ReMap_ChIP	lncap_dht	AR	3501	142340	0.024596	5555.66	97.6931	-21.0318	0.630168	1	1	Null_Model_OpenChrom	human
ReMap_ChIP	liver	HNF4A	5751	142340	0.0404033	6500.89	85.0144	-8.82076	0.884648	1	1	Null_Model_OpenChrom	human
ReMap_ChIP	jurkat	GATA3	718	142340	0.00504426	869.101	29.8844	-5.05618	0.826141	1	1	Null_Model_OpenChrom	human
ReMap_ChIP	saos	TAp73b	1748	142340	0.0122805	2929.78	64.2491	-18.3937	0.596632	1	1	Null_Model_OpenChrom	human
ReMap_ChIP	t47d	FOXA1	1848	142340	0.012983	3809.24	85.9029	-22.8308	0.485137	1	1	Null_Model_OpenChrom	human
TxnFactorChIPV3	A549+EtOH_0.02pct	FOSL2	3033	142340	0.0213081	4110.83	71.2314	-15.1314	0.737806	1	1	Null_Model_OpenChrom	human
TxnFactorChIPV3	GM12878	SPI1	3729	142340	0.0261978	4602.42	69.9739	-12.4821	0.810225	1	1	Null_Model_OpenChrom	human
Cistrome_ChIP	GM12891	SPI1	3925	142340	0.0275748	4840.73	75.7172	-12.0941	0.810828	1	1	Null_Model_OpenChrom	human
TxnFactorChIPV3	ECC-1+DEX_100nM	NR3C1	941	142340	0.00661093	1282.24	37.1492	-9.18558	0.733874	1	1	Null_Model_OpenChrom	human
TxnFactorChIPV3	ECC-1+Estradiol_10nM	ESR1	1459	142340	0.0102501	2088.79	49.2277	-12.7934	0.698491	1	1	Null_Model_OpenChrom	human
TxnFactorChIPV3	ECC-1+Genistein_100nM	ESR1	1174	142340	0.00824786	1558.88	41.3144	-9.31594	0.753104	1	1	Null_Model_OpenChrom	human
TxnFactorChIPV3	A549+EtOH_0.02pct	EP300	2324	142340	0.0163271	3014.76	58.6014	-11.7874	0.770874	1	1	Null_Model_OpenChrom	human
TxnFactorChIPV3	GM12878	ATF2	3196	142340	0.0224533	3754.59	63.8787	-8.74448	0.851226	1	1	Null_Model_OpenChrom	human
TxnFactorChIPV3	GM12878	BCL11A	1112	142340	0.00781228	2273.23	59.0103	-19.6784	0.489172	1	1	Null_Model_OpenChrom	human
TxnFactorChIPV3	GM12878	BCL3	1760	142340	0.0123648	2066.93	47.3627	-6.48039	0.851505	1	1	Null_Model_OpenChrom	human
TxnFactorChIPV3	GM12878	CEBPB	730	142340	0.00512857	1061.16	34.8914	-9.49106	0.687928	1	1	Null_Model_OpenChrom	human
TxnFactorChIPV3	GM12878	EP300	2197	142340	0.0154349	3084.59	61.3063	-14.478	0.71225	1	1	Null_Model_OpenChrom	human
TxnFactorChIPV3	GM12878	NFIC	2665	142340	0.0187228	4377.23	83.6267	-20.4747	0.608833	1	1	Null_Model_OpenChrom	human
TxnFactorChIPV3	GM12878	NFATC1	1267	142340	0.00890122	1787.31	45.5414	-11.4249	0.708888	1	1	Null_Model_OpenChrom	human
TxnFactorChIPV3	GM12878	BATF	1907	142340	0.0133975	3523.19	77.9153	-20.743	0.54127	1	1	Null_Model_OpenChrom	human
TxnFactorChIPV3	GM18505+TNFa	RELA	1388	142340	0.0097513	1628.16	41.7161	-5.75696	0.852497	1	1	Null_Model_OpenChrom	human
TxnFactorChIPV3	A549+DEX_5nM	NR3C1	763	142340	0.0053604	1437.87	43.7305	-15.4324	0.530647	1	1	Null_Model_OpenChrom	human
TxnFactorChIPV3	GM12878+TNFa	RELA	2074	142340	0.0145707	2878.86	58.7913	-13.6901	0.720425	1	1	Null_Model_OpenChrom	human
ReMap_ChIP	t47d	NR3C3	1672	142340	0.0117465	2688.58	61.3644	-16.5663	0.62189	1	1	Null_Model_OpenChrom	human
ReMap_ChIP	tall_rpmi8402	TAL1	5004	142340	0.0351553	5646.32	77.8566	-8.25008	0.886241	1	1	Null_Model_OpenChrom	human
ReMap_ChIP	tall_rpmi8402	TCF3	1902	142340	0.0133624	2731.12	56.1471	-14.7669	0.696418	1	1	Null_Model_OpenChrom	human
ReMap_ChIP	thp1	SPI1	6130	142340	0.0430659	6678	82.1318	-6.6722	0.91794	1	1	Null_Model_OpenChrom	human
ReMap_ChIP	u2os_e2	ESR2	1336	142340	0.00938598	1644.05	42.797	-7.19803	0.812625	1	1	Null_Model_OpenChrom	human
TxnFactorChIPV3	GM12891	SPI1	4144	142340	0.0291134	5094.38	79.1996	-11.9998	0.813445	1	1	Null_Model_OpenChrom	human
TxnFactorChIPV3	A549+DEX_50nM	NR3C1	2061	142340	0.0144794	3091.84	63.7868	-16.1607	0.666593	1	1	Null_Model_OpenChrom	human
ReMap_ChIP	u87_dmso	BRD4	1881	142340	0.0132148	2140.07	47.7514	-5.42547	0.878942	1	1	Null_Model_OpenChrom	human
ReMap_ChIP	u937_bio	CEBPA	2366	142340	0.0166222	5053.25	109	-24.6537	0.468213	1	1	Null_Model_OpenChrom	human
ReMap_ChIP	u937_bmp4	SMAD1	1556	142340	0.0109316	4189.2	104.663	-25.1588	0.371431	1	1	Null_Model_OpenChrom	human
ReMap_ChIP	u937_dmso	CEBPA	1818	142340	0.0127722	3790.48	86.2374	-22.8726	0.479623	1	1	Null_Model_OpenChrom	human
ReMap_ChIP	vcap_dht2hr	ERG	1135	142340	0.00797387	2219.69	57.8897	-18.7371	0.511334	1	1	Null_Model_OpenChrom	human
ReMap_ChIP	vcap_dht	AR	4205	142340	0.0295419	6541.79	107.271	-21.784	0.64279	1	1	Null_Model_OpenChrom	human
ReMap_ChIP	zr751	FOXA1	1823	142340	0.0128074	3565.98	81.2977	-21.4395	0.51122	1	1	Null_Model_OpenChrom	human
ReMap_ChIP	u87	MBD4	2316	142340	0.0162709	3306.76	63.8957	-15.5059	0.700383	1	1	Null_Model_OpenChrom	human
TxnFactorChIPV3	HeLa-S3	EP300	1711	142340	0.0120205	3740.16	88.8524	-22.8374	0.457467	1	1	Null_Model_OpenChrom	human
TxnFactorChIPV3	HeLa-S3	FOS	795	142340	0.00558522	1347.07	39.9733	-13.8109	0.590171	1	1	Null_Model_OpenChrom	human
ReMap_ChIP	hspc	SPI1	1694	142340	0.0119011	2082.07	47.2124	-8.21957	0.813615	1	1	Null_Model_OpenChrom	human
Pazar_Chip	MCF7+oestrogen	ERA	3906	142340	0.0274413	5571.8	89.9854	-18.5119	0.70103	1	1	Null_Model_OpenChrom	human
Pazar_Chip	MCF7	TRIM24	757	142340	0.00531825	1036.78	32.0575	-8.72755	0.730143	1	1	Null_Model_OpenChrom	human
TxnFactorChIPV3	IMR90	MAFK	2265	142340	0.0159126	2899.57	57.633	-11.0105	0.78115	1	1	Null_Model_OpenChrom	human
TxnFactorChIPV3	IMR90	CEBPB	4861	142340	0.0341506	7122.45	108.55	-20.8332	0.68249	1	1	Null_Model_OpenChrom	human
Pazar_Chip	Saos	Tp73alpha	1831	142340	0.0128636	3401.85	75.994	-20.6708	0.538236	1	1	Null_Model_OpenChrom	human
TxnFactorChIPV3	HUVEC	JUN	1962	142340	0.0137839	3984.13	89.0732	-22.7019	0.492453	1	1	Null_Model_OpenChrom	human
Pazar_Chip	MCF7	GATA3	1721	142340	0.0120908	2385.37	52.2637	-12.7118	0.721482	1	1	Null_Model_OpenChrom	human
TxnFactorChIPV3	HUVEC	GATA2	2247	142340	0.0157861	3940.3	79.9108	-21.1899	0.570261	1	1	Null_Model_OpenChrom	human
Pazar_Chip	Saos	Tp73beta	2465	142340	0.0173177	3935.73	78.5341	-18.7272	0.626314	1	1	Null_Model_OpenChrom	human
Pazar_Chip	THP-1	NR1H	1746	142340	0.0122664	2212.33	49.4214	-9.43578	0.789213	1	1	Null_Model_OpenChrom	human
Pazar_Chip	THP-1	SPI1	8739	142340	0.0613953	9467.38	96.6788	-7.53403	0.923064	1	1	Null_Model_OpenChrom	human
Pazar_Chip	U20S+DoxycyclineandE2	Erbeta	1138	142340	0.00799494	1551.96	41.4891	-9.97752	0.733267	1	1	Null_Model_OpenChrom	human
Pazar_Chip	U20S+Doxycycline	Erbeta	714	142340	0.00501616	854.401	28.6886	-4.89394	0.835674	1	1	Null_Model_OpenChrom	human
Pazar_Chip	U937+BIO	CEBPA	2314	142340	0.0162568	4440.66	93.6579	-22.7067	0.521094	1	1	Null_Model_OpenChrom	human
TxnFactorChIPV3	HUVEC	FOS	3634	142340	0.0255304	6515.07	121.885	-23.6376	0.557784	1	1	Null_Model_OpenChrom	human
Pazar_Chip	U937+BMP4	CEBPA	808	142340	0.00567655	1502.98	45.0265	-15.4349	0.537599	1	1	Null_Model_OpenChrom	human
Pazar_Chip	MCF7+ETOH	FOXA1	2632	142340	0.0184909	3652.77	68.427	-14.9177	0.720548	1	1	Null_Model_OpenChrom	human
Pazar_Chip	MCF7+E2	FOXA1	2630	142340	0.0184769	3755.8	72.3763	-15.5548	0.700251	1	1	Null_Model_OpenChrom	human
TxnFactorChIPV3	K562+IFNg30	JUN	820	142340	0.00576085	1241.73	38.7177	-10.8925	0.660367	1	1	Null_Model_OpenChrom	human
Pazar_Chip	HeLa	SMC4	2678	142340	0.0188141	3657.66	66.2109	-14.796	0.732162	1	1	Null_Model_OpenChrom	human
Pazar_Chip	K562+BIO	GATA2	1686	142340	0.0118449	2069.65	47.1864	-8.13057	0.81463	1	1	Null_Model_OpenChrom	human
Pazar_Chip	K562	EGR1	8571	142340	0.060215	9172.75	94.3305	-6.37915	0.934398	1	1	Null_Model_OpenChrom	human
Pazar_Chip	keratinocytes	TP63	1603	142340	0.0112618	2557.33	59.0745	-16.1546	0.626827	1	1	Null_Model_OpenChrom	human
TxnFactorChIPV3	K562	GATA2	2476	142340	0.017395	3193.76	60.5812	-11.8479	0.775262	1	1	Null_Model_OpenChrom	human
Pazar_Chip	MCF7+estradiol	GATA3	3426	142340	0.0240691	4816.53	80.0338	-17.3742	0.711301	1	1	Null_Model_OpenChrom	human
Pazar_Chip	LNCaP+DHT	AR	4056	142340	0.0284952	6618.24	112.69	-22.7371	0.612851	1	1	Null_Model_OpenChrom	human
Pazar_Chip	LNCaP+ethanol	AR	745	142340	0.00523395	1689.95	50.8935	-18.5671	0.440842	1	1	Null_Model_OpenChrom	human
Pazar_Chip	LNCaP+ethanol	FOXA1	4594	142340	0.0322748	6830.39	106.707	-20.9582	0.672582	1	1	Null_Model_OpenChrom	human
Pazar_Chip	LNCaP	FOXA1	2188	142340	0.0153716	3559.5	75.1971	-18.2387	0.614693	1	1	Null_Model_OpenChrom	human
Pazar_Chip	LS174T	TCF4	1465	142340	0.0102923	1740.33	41.7854	-6.58921	0.841793	1	1	Null_Model_OpenChrom	human
Pazar_Chip	LS180	CEBPb	2076	142340	0.0145848	2383.16	48.8918	-6.28249	0.871112	1	1	Null_Model_OpenChrom	human
Pazar_Chip	LS180+Veh	CEBPb	1981	142340	0.0139174	2212.5	45.9438	-5.03884	0.895366	1	1	Null_Model_OpenChrom	human
Pazar_Chip	LNCaP+DHT	FOXA1	2708	142340	0.0190249	4731.74	93.3983	-21.6679	0.572305	1	1	Null_Model_OpenChrom	human
Pazar_Chip	U937+BMP4	SMAD1	1402	142340	0.00984966	3748.13	96.287	-24.3661	0.374053	1	1	Null_Model_OpenChrom	human
Pazar_Chip	U937+DMSO	CEBPA	1805	142340	0.0126809	3313.77	74.9108	-20.1408	0.544697	1	1	Null_Model_OpenChrom	human
ReMap_ChIP	ab32	NR3C3	2007	142340	0.0141	3366.78	71.3312	-19.0629	0.596119	1	1	Null_Model_OpenChrom	human
TxnFactorChIPV3	HepG2	CEBPB	3968	142340	0.0278769	4912.43	73.8259	-12.7926	0.807747	1	1	Null_Model_OpenChrom	human
ReMap_ChIP	esc	EOMES	1021	142340	0.00717297	1537.93	42.5676	-12.1438	0.663878	1	1	Null_Model_OpenChrom	human
ReMap_ChIP	esc	FOXH1	1321	142340	0.0092806	1586.18	40.3688	-6.56903	0.832816	1	1	Null_Model_OpenChrom	human
ReMap_ChIP	esc	SMARCA4	932	142340	0.0065477	1237.56	35.7886	-8.53793	0.753095	1	1	Null_Model_OpenChrom	human
ReMap_ChIP	fibrobj_post	SOX2	965	142340	0.00677954	1570.83	43.564	-13.9066	0.614326	1	1	Null_Model_OpenChrom	human
TxnFactorChIPV3	HeLa-S3	STAT3	1316	142340	0.00924547	2041.6	50.6718	-14.3196	0.644593	1	1	Null_Model_OpenChrom	human
TxnFactorChIPV3	HepG2	EP300	3306	142340	0.0232261	4174.44	70.6549	-12.2913	0.791963	1	1	Null_Model_OpenChrom	human
ReMap_ChIP	helab2_wt_ta_tnfa	NR3C1	770	142340	0.00540958	991.203	31.9665	-6.91982	0.776834	1	1	Null_Model_OpenChrom	human
Cistrome_ChIP	HCT-116	SP1	3438	142340	0.0241534	3897.02	62.2825	-7.3699	0.882213	1	1	Null_Model_OpenChrom	human
ReMap_ChIP	hepg2	CEBPA	1755	142340	0.0123296	2320.88	52.7417	-10.7292	0.75618	1	1	Null_Model_OpenChrom	human
ReMap_ChIP	hepg2	HNF4A	1536	142340	0.0107911	2118.52	50.0679	-11.6345	0.725036	1	1	Null_Model_OpenChrom	human
Cistrome_ChIP	HaematopoieticProgenitorCell	SPI1	835	142340	0.00586624	1103.34	34.526	-7.77225	0.75679	1	1	Null_Model_OpenChrom	human
TxnFactorChIPV3	HeLa-S3	JUN	1550	142340	0.0108894	3090.69	71.199	-21.6393	0.501505	1	1	Null_Model_OpenChrom	human
TxnFactorChIPV3	HeLa-S3	JUND	3926	142340	0.0275818	4375.43	65.8099	-6.82915	0.897284	1	1	Null_Model_OpenChrom	human
ReMap_ChIP	helab2_wt_tnfa	RELA	1091	142340	0.00766475	1464.27	40.983	-9.10789	0.745082	1	1	Null_Model_OpenChrom	human
ReMap_ChIP	endoderm	FOXH1	2653	142340	0.0186385	3730.18	70.6127	-15.2547	0.711226	1	1	Null_Model_OpenChrom	human
ReMap_ChIP	cd4_il12	STAT5B	721	142340	0.00506534	1142.48	36.8027	-11.4523	0.631085	1	1	Null_Model_OpenChrom	human
ReMap_ChIP	cd36_shluc	TAL1	2463	142340	0.0173036	3382.07	64.7891	-14.1855	0.728253	1	1	Null_Model_OpenChrom	human
Cistrome_ChIP	HeLa-S3	EP300	1541	142340	0.0108262	3891.54	97.1217	-24.202	0.395987	1	1	Null_Model_OpenChrom	human
TxnFactorChIPV3	HepG2	SP1	3088	142340	0.0216945	3554.8	59.3125	-7.87009	0.868686	1	1	Null_Model_OpenChrom	human
ReMap_ChIP	blood_macrophage	CEBPB	2143	142340	0.0150555	3430.54	70.8926	-18.1618	0.624683	1	1	Null_Model_OpenChrom	human
ReMap_ChIP	blood_macrophage	SPI1	4483	142340	0.031495	6587.47	104.447	-20.1487	0.680534	1	1	Null_Model_OpenChrom	human
TxnFactorChIPV3	HepG2	NFIC	2274	142340	0.0159758	2640.5	53.7333	-6.82065	0.861202	1	1	Null_Model_OpenChrom	human
ReMap_ChIP	cd34+hspc_adult	GATA1	3547	142340	0.0249192	3971.44	63.8903	-6.64322	0.893127	1	1	Null_Model_OpenChrom	human
TxnFactorChIPV3	HepG2	MAFK	2714	142340	0.019067	2990.76	54.5654	-5.07215	0.90746	1	1	Null_Model_OpenChrom	human
TxnFactorChIPV3	HepG2	JUN	918	142340	0.00644935	1344.88	38.1995	-11.1749	0.682591	1	1	Null_Model_OpenChrom	human
ReMap_ChIP	cd34_nont8_21	RUNX1	4558	142340	0.0320219	4929.57	69.5603	-5.3417	0.924624	1	1	Null_Model_OpenChrom	human
TxnFactorChIPV3	HepG2	HNF4G	2074	142340	0.0145707	2472.69	52.0933	-7.65336	0.838763	1	1	Null_Model_OpenChrom	human
TxnFactorChIPV3	HepG2	HNF4A	1891	142340	0.0132851	2440.15	52.0957	-10.5412	0.774952	1	1	Null_Model_OpenChrom	human
ReMap_ChIP	cd36_shbrg1	TAL1	1231	142340	0.00864831	1646.58	42.6173	-9.75134	0.747612	1	1	Null_Model_OpenChrom	human
TxnFactorChIPV3	HepG2	FOXA2	3970	142340	0.027891	4313.45	68.0733	-5.04525	0.920378	1	1	Null_Model_OpenChrom	human
TxnFactorChIPV3	HepG2	FOXA1	5419	142340	0.0380708	5798.25	73.5228	-5.1583	0.934592	1	1	Null_Model_OpenChrom	human
ReMap_ChIP	cd36_shluc	GATA1	1886	142340	0.01325	2540.7	54.4542	-12.0229	0.742316	1	1	Null_Model_OpenChrom	human
Pazar_Chip	CD34+prog	SMAD1	765	142340	0.00537446	2228.7	67.4575	-21.6982	0.343249	1	1	Null_Model_OpenChrom	human
ReMap_ChIP	k562_bmp	GATA1	973	142340	0.00683575	2218.12	60.907	-20.443	0.438659	1	1	Null_Model_OpenChrom	human

## Sheet: HFF_CTCF_HCMV_rep1_nonTF_RELI
Track	Cell	TF	Overlap	Total	Ratio	Mean	STD	Z-score	Enrichment	P-val	Corrected P-val	Null_Model	Species
DNaseClusters	HCT-116	Dnase	40265	142340	0.282879	12876.8	873.254	31.3633	3.12693	3.20202e-216	8.44694e-213	Null_Model_OpenChrom	human
DNaseClusters	PANC-1	Dnase	35724	142340	0.250977	13069.2	724.678	31.2619	2.73345	7.68979e-215	2.02857e-211	Null_Model_OpenChrom	human
DNaseClusters	H9ES	Dnase	45728	142340	0.321259	18368.8	875.55	31.248	2.48943	1.18897e-214	3.1365e-211	Null_Model_OpenChrom	human
DNaseI_Duke	HEK293T	Dnase	47177	142340	0.331439	20649.5	849.316	31.234	2.28466	1.84277e-214	4.86123e-211	Null_Model_OpenChrom	human
DNaseClusters	BE2_C	Dnase	41757	142340	0.293361	17426	779.306	31.2214	2.39625	2.73223e-214	7.20764e-211	Null_Model_OpenChrom	human
DNaseClusters	NT2-D1	Dnase	45624	142340	0.320528	19325.2	842.528	31.2141	2.36085	3.42432e-214	9.03334e-211	Null_Model_OpenChrom	human
DNaseClusters	HEK293T	Dnase	47177	142340	0.331439	20646.1	850.096	31.2093	2.28504	3.98097e-214	1.05018e-210	Null_Model_OpenChrom	human
DNaseI_Duke	MCF7+Randomized_shRNA_control	Dnase	46716	142340	0.3282	20318.7	845.922	31.2054	2.29916	4.50653e-214	1.18882e-210	Null_Model_OpenChrom	human
DNaseClusters	CD34+_Mobilized	Dnase	42459	142340	0.298293	18217.5	777.282	31.1876	2.33068	7.84746e-214	2.07016e-210	Null_Model_OpenChrom	human
DNaseClusters	Jurkat	Dnase	38125	142340	0.267845	15566.4	723.412	31.1836	2.44918	8.90196e-214	2.34834e-210	Null_Model_OpenChrom	human
DNaseClusters	Huh-7	Dnase	40731	142340	0.286153	17223.2	753.92	31.1807	2.36489	9.72158e-214	2.56455e-210	Null_Model_OpenChrom	human
DNaseI_Duke	MCF7	Dnase	46052	142340	0.323535	20274.6	826.896	31.1737	2.27142	1.20963e-213	3.191e-210	Null_Model_OpenChrom	human
DNaseI_Duke	iPS_NIHi7	Dnase	50084	142340	0.351862	23910	839.83	31.1658	2.09469	1.54733e-213	4.08186e-210	Null_Model_OpenChrom	human
Roadmapepigenomics_Dnase_narrow	H1_Cell_Line	Dnase	58487	142340	0.410896	30172.6	908.638	31.1614	1.93842	1.77703e-213	4.6878e-210	Null_Model_OpenChrom	human
DNaseClusters	MCF-7	Dnase	44807	142340	0.314789	20878.7	768.418	31.1397	2.14606	3.49635e-213	9.22337e-210	Null_Model_OpenChrom	human
DNaseClusters	WERI-Rb-1	Dnase	38448	142340	0.270114	17187.5	682.995	31.1283	2.23697	4.98464e-213	1.31495e-209	Null_Model_OpenChrom	human
DNaseI_Duke	iPS_CWRU1	Dnase	51300	142340	0.360405	25219.1	838.008	31.1226	2.03418	5.96595e-213	1.57382e-209	Null_Model_OpenChrom	human
DNaseClusters	MCF-7+Hypoxia_LacAcid	Dnase	39128	142340	0.274891	16961.9	712.319	31.1182	2.30682	6.82254e-213	1.79979e-209	Null_Model_OpenChrom	human
DNaseClusters	NB4	Dnase	35761	142340	0.251236	15894.2	638.435	31.118	2.24994	6.88023e-213	1.815e-209	Null_Model_OpenChrom	human
DNaseClusters	A549	Dnase	42902	142340	0.301405	19266.6	759.692	31.1118	2.22676	8.33215e-213	2.19802e-209	Null_Model_OpenChrom	human
DNaseClusters	HMVEC-dNeo	Dnase	36700	142340	0.257833	16161.7	660.309	31.1041	2.2708	1.06003e-212	2.79636e-209	Null_Model_OpenChrom	human
DNaseClusters	HeLa-S3+IFNa4h	Dnase	32242	142340	0.226514	13106.6	615.405	31.0939	2.45998	1.4549e-212	3.83804e-209	Null_Model_OpenChrom	human
DNaseClusters	HMVEC-LLy	Dnase	36939	142340	0.259512	16065.4	671.514	31.0843	2.29928	1.96259e-212	5.17731e-209	Null_Model_OpenChrom	human
DNaseClusters	HMVEC-dLy-Ad	Dnase	33404	142340	0.234678	14299.8	614.597	31.0841	2.33597	1.97548e-212	5.21132e-209	Null_Model_OpenChrom	human
DNaseClusters	HepG2	Dnase	44343	142340	0.311529	20982.4	751.601	31.0811	2.11334	2.17057e-212	5.72596e-209	Null_Model_OpenChrom	human
DNaseClusters	HTR8svn	Dnase	34506	142340	0.24242	15104.4	624.75	31.055	2.2845	4.89011e-212	1.29001e-208	Null_Model_OpenChrom	human
Roadmapepigenomics_Dnase_narrow	H9_Cell_Line	Dnase	50679	142340	0.356042	26806.7	768.799	31.0514	1.89053	5.46438e-212	1.4415e-208	Null_Model_OpenChrom	human
DNaseClusters	H7-hESC	Dnase	48825	142340	0.343017	25248.6	759.377	31.047	1.93377	6.26705e-212	1.65325e-208	Null_Model_OpenChrom	human
DNaseI_Duke	H9ES	Dnase	48867	142340	0.343312	24970	769.885	31.0398	1.95703	7.84343e-212	2.0691e-208	Null_Model_OpenChrom	human
DNaseI_Duke	MCF7+Hypoxia_LacAcid_ctrl	Dnase	47206	142340	0.331643	23723	756.722	31.0326	1.98989	9.8012e-212	2.58556e-208	Null_Model_OpenChrom	human
DNaseI_Duke	iSP_NIHi11	Dnase	49109	142340	0.345012	25587.1	758.476	31.012	1.91928	1.85743e-211	4.89991e-208	Null_Model_OpenChrom	human
DNaseI_Duke	MCF7+Hypoxia_LacAcid	Dnase	42772	142340	0.300492	21464.2	687.234	31.0052	1.99271	2.29549e-211	6.05551e-208	Null_Model_OpenChrom	human
DNaseClusters	CMK	Dnase	32205	142340	0.226254	13893.1	590.804	30.9949	2.31806	3.15906e-211	8.3336e-208	Null_Model_OpenChrom	human
DNaseClusters	CD20+	Dnase	28025	142340	0.196888	12073.2	514.728	30.9908	2.32127	3.58459e-211	9.45616e-208	Null_Model_OpenChrom	human
DNaseClusters	GM12865	Dnase	34212	142340	0.240354	15550.7	602.174	30.9899	2.20003	3.68533e-211	9.7219e-208	Null_Model_OpenChrom	human
DNaseClusters	Ishikawa+4OHTAM_100nM_30m	Dnase	34375	142340	0.241499	15988.9	593.327	30.9882	2.14993	3.88734e-211	1.02548e-207	Null_Model_OpenChrom	human
DNaseClusters	HMVEC-dBl-Neo	Dnase	38786	142340	0.272488	18978.8	639.189	30.988	2.04364	3.91612e-211	1.03307e-207	Null_Model_OpenChrom	human
DNaseClusters	Ishikawa+Estradiol_100nM_1hr	Dnase	33746	142340	0.23708	15531.7	588.031	30.975	2.17271	5.85503e-211	1.54456e-207	Null_Model_OpenChrom	human
DNaseI_Duke	Mel_2183	Dnase	37862	142340	0.265997	18015.5	641.347	30.945	2.10164	1.48102e-210	3.90694e-207	Null_Model_OpenChrom	human
DNaseClusters	GM18507	Dnase	30239	142340	0.212442	13504.2	540.869	30.9406	2.23923	1.70054e-210	4.48603e-207	Null_Model_OpenChrom	human
DNaseClusters	HMVEC-dLy-Neo	Dnase	36034	142340	0.253154	17555.7	597.484	30.9269	2.05255	2.59982e-210	6.85832e-207	Null_Model_OpenChrom	human
DNaseI_Duke	K562+G1_phase	Dnase	39057	142340	0.274392	19413.5	635.202	30.9248	2.01185	2.77261e-210	7.31415e-207	Null_Model_OpenChrom	human
DNaseClusters	iPS	Dnase	43107	142340	0.302845	22979.2	651.059	30.9154	1.87591	3.70504e-210	9.77389e-207	Null_Model_OpenChrom	human
DNaseClusters	HMVEC-dAd	Dnase	31478	142340	0.221147	14461.4	550.458	30.9136	2.17669	3.92501e-210	1.03542e-206	Null_Model_OpenChrom	human
DNaseClusters	Huh-7.5	Dnase	40008	142340	0.281073	20371.5	635.222	30.9128	1.96392	4.02172e-210	1.06093e-206	Null_Model_OpenChrom	human
Roadmapepigenomics_Dnase_narrow	iPS_DF_6.9_Cell_Line	Dnase	62992	142340	0.442546	39188.2	770.203	30.9059	1.60742	4.98009e-210	1.31375e-206	Null_Model_OpenChrom	human
DNaseClusters	HeLa-S3	Dnase	40332	142340	0.28335	21087	622.711	30.9052	1.91265	5.07974e-210	1.34004e-206	Null_Model_OpenChrom	human
DNaseI_Duke	ECC-1+DMSO_0.02pct	Dnase	39737	142340	0.27917	20246.2	630.806	30.8983	1.96269	6.29698e-210	1.66114e-206	Null_Model_OpenChrom	human
DNaseClusters	Urothelia	Dnase	34936	142340	0.24544	16828.1	586.203	30.8901	2.07605	8.11635e-210	2.14109e-206	Null_Model_OpenChrom	human
DNaseClusters	T-47D	Dnase	34693	142340	0.243733	16640.8	584.492	30.8853	2.08482	9.4172e-210	2.48426e-206	Null_Model_OpenChrom	human
DNaseI_Duke	K562+G2-M_phase	Dnase	37782	142340	0.265435	19152.4	603.412	30.8739	1.97271	1.3402e-209	3.53544e-206	Null_Model_OpenChrom	human
DNaseClusters	H1-hESC	Dnase	50144	142340	0.352283	27997.6	717.74	30.8557	1.79101	2.34916e-209	6.19709e-206	Null_Model_OpenChrom	human
DNaseClusters	K562	Dnase	39067	142340	0.274463	20516.5	601.265	30.8525	1.90418	2.59311e-209	6.84062e-206	Null_Model_OpenChrom	human
Roadmapepigenomics_Dnase_narrow	H1_BMP4_Derived_Mesendoderm_Cultured_Cells	Dnase	54672	142340	0.384094	32888.6	706.255	30.8435	1.66234	3.42795e-209	9.04293e-206	Null_Model_OpenChrom	human
Roadmapepigenomics_Dnase_narrow	Mobilized_CD34_Primary_Cells_Male	Dnase	46279	142340	0.32513	26029.5	656.572	30.8413	1.77795	3.66515e-209	9.66867e-206	Null_Model_OpenChrom	human
DNaseClusters	HConF	Dnase	35556	142340	0.249796	17802	575.699	30.8391	1.99731	3.92199e-209	1.03462e-205	Null_Model_OpenChrom	human
DNaseI_Duke	A549	Dnase	42662	142340	0.299719	23001.7	637.688	30.8306	1.85473	5.10046e-209	1.3455e-205	Null_Model_OpenChrom	human
DNaseClusters	HSMM_emb	Dnase	32036	142340	0.225067	15491.7	536.701	30.8259	2.06794	5.90116e-209	1.55673e-205	Null_Model_OpenChrom	human
DNaseI_Duke	K562	Dnase	39935	142340	0.280561	21096.6	611.122	30.8258	1.89295	5.9049e-209	1.55771e-205	Null_Model_OpenChrom	human
DNaseI_Duke	HepG2	Dnase	41108	142340	0.288801	22093.3	616.956	30.8203	1.86066	7.00941e-209	1.84908e-205	Null_Model_OpenChrom	human
DNaseClusters	LNCaP+androgen	Dnase	33683	142340	0.236638	16645.1	552.845	30.8186	2.0236	7.38174e-209	1.9473e-205	Null_Model_OpenChrom	human
Roadmapepigenomics_Dnase_narrow	A549_EtOH_0.02pct_Lung_Carcinoma	Dnase	50617	142340	0.355606	29109.8	697.869	30.8183	1.73883	7.44531e-209	1.96407e-205	Null_Model_OpenChrom	human
DNaseI_Duke	Ishikawa+Estradiol_10nM_30m	Dnase	36737	142340	0.258093	19204.8	569.033	30.8105	1.91291	9.48116e-209	2.50113e-205	Null_Model_OpenChrom	human
DNaseI_Duke	GC_B_cell	Dnase	36711	142340	0.257911	19055.8	573.216	30.8002	1.9265	1.30251e-208	3.43601e-205	Null_Model_OpenChrom	human
DNaseI_Duke	Ishikawa+4OHTAM_100nM_30m	Dnase	37180	142340	0.261206	19725.7	567.001	30.7835	1.88485	2.17824e-208	5.74621e-205	Null_Model_OpenChrom	human
DNaseClusters	GM19239	Dnase	31539	142340	0.221575	15185.3	531.552	30.7659	2.07694	3.74791e-208	9.88699e-205	Null_Model_OpenChrom	human
DNaseClusters	HPAEC	Dnase	29349	142340	0.206189	14191.8	492.833	30.7552	2.06802	5.20541e-208	1.37319e-204	Null_Model_OpenChrom	human
DNaseClusters	RWPE1	Dnase	34091	142340	0.239504	17702.7	532.896	30.7532	1.92575	5.53483e-208	1.46009e-204	Null_Model_OpenChrom	human
DNaseClusters	8988T	Dnase	39547	142340	0.277835	21880.4	574.55	30.7485	1.80741	6.39363e-208	1.68664e-204	Null_Model_OpenChrom	human
DNaseClusters	Th2	Dnase	22856	142340	0.160573	10274.1	409.271	30.7423	2.22463	7.75383e-208	2.04546e-204	Null_Model_OpenChrom	human
DNaseClusters	HPDE6-E6E7	Dnase	31688	142340	0.222622	16043.5	508.982	30.7368	1.97513	9.18379e-208	2.42268e-204	Null_Model_OpenChrom	human
DNaseClusters	HMVEC-dBl-Ad	Dnase	35426	142340	0.248883	18365.9	555.138	30.7312	1.9289	1.08931e-207	2.8736e-204	Null_Model_OpenChrom	human
DNaseClusters	GM12864	Dnase	29745	142340	0.208971	14882.7	483.708	30.7257	1.99863	1.29177e-207	3.40769e-204	Null_Model_OpenChrom	human
DNaseI_Duke	Colo829	Dnase	35779	142340	0.251363	19034.9	545.046	30.7205	1.87965	1.51542e-207	3.99767e-204	Null_Model_OpenChrom	human
Roadmapepigenomics_Dnase_narrow	iPS_DF_19.11_Cell_Line	Dnase	62645	142340	0.440108	39359.3	758.227	30.7107	1.59162	2.0489e-207	5.405e-204	Null_Model_OpenChrom	human
DNaseClusters	GM19238	Dnase	33350	142340	0.234298	17445.3	517.99	30.7047	1.91169	2.46318e-207	6.49788e-204	Null_Model_OpenChrom	human
DNaseI_Duke	ECC-1+Estradiol_10nM_30m	Dnase	38509	142340	0.270542	21217.8	563.192	30.7021	1.81494	2.66513e-207	7.03061e-204	Null_Model_OpenChrom	human
DNaseClusters	HL-60	Dnase	31296	142340	0.219868	16268.2	489.52	30.6991	1.92376	2.92276e-207	7.71025e-204	Null_Model_OpenChrom	human
DNaseI_Duke	HTR8svn	Dnase	37981	142340	0.266833	20867	557.804	30.6809	1.82014	5.11168e-207	1.34846e-203	Null_Model_OpenChrom	human
DNaseClusters	HUVEC	Dnase	39231	142340	0.275615	21683.2	571.983	30.6789	1.80928	5.44918e-207	1.43749e-203	Null_Model_OpenChrom	human
DNaseClusters	HRGEC	Dnase	31336	142340	0.220149	15507.6	516.005	30.6749	2.02069	6.15494e-207	1.62367e-203	Null_Model_OpenChrom	human
DNaseI_Duke	K562+SAHA_ctrl	Dnase	40742	142340	0.28623	23128.4	574.596	30.6538	1.76155	1.17464e-206	3.0987e-203	Null_Model_OpenChrom	human
DNaseClusters	GM12891	Dnase	32438	142340	0.227891	16992	504.053	30.6436	1.90902	1.60647e-206	4.23787e-203	Null_Model_OpenChrom	human
DNaseI_Duke	Medullo_D341	Dnase	47667	142340	0.334881	29598.3	589.672	30.6419	1.61046	1.69168e-206	4.46265e-203	Null_Model_OpenChrom	human
DNaseClusters	GM12878	Dnase	35222	142340	0.24745	19528	512.177	30.6418	1.80367	1.6996e-206	4.48354e-203	Null_Model_OpenChrom	human
DNaseClusters	CLL	Dnase	23589	142340	0.165723	11206.9	404.124	30.6392	2.10485	1.83955e-206	4.85274e-203	Null_Model_OpenChrom	human
DNaseClusters	HMVEC-LBl	Dnase	35204	142340	0.247323	19222.4	521.724	30.6323	1.83141	2.27062e-206	5.98989e-203	Null_Model_OpenChrom	human
DNaseClusters	SK-N-MC	Dnase	26581	142340	0.186743	13273.2	434.677	30.6154	2.00261	3.81982e-206	1.00767e-202	Null_Model_OpenChrom	human
DNaseClusters	HPF	Dnase	32449	142340	0.227968	17815	478.147	30.6056	1.82144	5.14885e-206	1.35827e-202	Null_Model_OpenChrom	human
DNaseClusters	Urothelia+UT189	Dnase	35169	142340	0.247077	19441.5	514.05	30.5953	1.80896	7.07309e-206	1.86588e-202	Null_Model_OpenChrom	human
DNaseI_Duke	Urothelia	Dnase	35978	142340	0.252761	19859.4	527.077	30.581	1.81163	1.09349e-205	2.88462e-202	Null_Model_OpenChrom	human
DNaseClusters	Monocytes-CD14+_RO01746	Dnase	28217	142340	0.198237	14700.8	442.021	30.5782	1.91942	1.19273e-205	3.14643e-202	Null_Model_OpenChrom	human
DNaseClusters	HPAF	Dnase	37793	142340	0.265512	21555.8	531.043	30.5761	1.75326	1.27319e-205	3.35869e-202	Null_Model_OpenChrom	human
DNaseClusters	HFF-Myc	Dnase	39239	142340	0.275671	23230.6	523.578	30.575	1.68911	1.31772e-205	3.47616e-202	Null_Model_OpenChrom	human
DNaseClusters	Gliobla	Dnase	34544	142340	0.242687	19188.8	502.384	30.5647	1.80022	1.80426e-205	4.75963e-202	Null_Model_OpenChrom	human
DNaseI_Duke	Huh-7	Dnase	45094	142340	0.316805	27822.4	565.386	30.5483	1.62078	2.9809e-205	7.86362e-202	Null_Model_OpenChrom	human
DNaseI_Duke	GM18507	Dnase	33208	142340	0.233301	18201	491.306	30.5451	1.82451	3.28865e-205	8.67545e-202	Null_Model_OpenChrom	human
Roadmapepigenomics_Dnase_narrow	Mobilized_CD34_Primary_Cells_Female	Dnase	47825	142340	0.335991	29557.4	598.293	30.5329	1.61804	4.76717e-205	1.25758e-201	Null_Model_OpenChrom	human
DNaseClusters	SK-N-SH_RA	Dnase	21536	142340	0.1513	10180.9	372.137	30.5133	2.11534	8.67007e-205	2.28717e-201	Null_Model_OpenChrom	human
DNaseClusters	Stellate	Dnase	34952	142340	0.245553	19550.3	505.085	30.4933	1.7878	1.59655e-204	4.2117e-201	Null_Model_OpenChrom	human
DNaseClusters	HFF	Dnase	38172	142340	0.268175	22114.3	526.808	30.4811	1.72612	2.32315e-204	6.12847e-201	Null_Model_OpenChrom	human
DNaseI_Duke	Urothelia+UT189	Dnase	34797	142340	0.244464	20061.1	483.68	30.4661	1.73455	3.66152e-204	9.65909e-201	Null_Model_OpenChrom	human
DNaseI_Duke	K562+SAHA_1uM_72hr	Dnase	36233	142340	0.254552	21177.7	494.197	30.4642	1.7109	3.88822e-204	1.02571e-200	Null_Model_OpenChrom	human
DNaseClusters	GM19240	Dnase	35052	142340	0.246255	19910.2	497.663	30.4258	1.7605	1.25113e-203	3.30048e-200	Null_Model_OpenChrom	human
Roadmapepigenomics_Dnase_narrow	H1_Derived_Neuronal_Progenitor_Cultured_Cells	Dnase	47355	142340	0.332689	30018.6	569.99	30.4152	1.57752	1.7279e-203	4.55819e-200	Null_Model_OpenChrom	human
DNaseClusters	HCF	Dnase	34555	142340	0.242764	20145.3	473.963	30.4026	1.71529	2.53408e-203	6.68489e-200	Null_Model_OpenChrom	human
DNaseI_Duke	RWPE1	Dnase	37503	142340	0.263475	22497.6	493.657	30.3964	1.66698	3.06007e-203	8.07247e-200	Null_Model_OpenChrom	human
DNaseI_Duke	FibroP_AG20443	Dnase	39036	142340	0.274245	23781.3	501.953	30.3907	1.64146	3.64115e-203	9.60536e-200	Null_Model_OpenChrom	human
Roadmapepigenomics_Dnase_narrow	Fetal_Intestine_Small	Dnase	33631	142340	0.236272	19851.6	453.519	30.3834	1.69412	4.55756e-203	1.20228e-199	Null_Model_OpenChrom	human
DNaseI_Duke	HeLa-S3+INFa4h	Dnase	41974	142340	0.294885	26212.7	518.943	30.372	1.60129	6.42937e-203	1.69607e-199	Null_Model_OpenChrom	human
Roadmapepigenomics_Dnase_narrow	Fetal_Adrenal_Gland	Dnase	48403	142340	0.340052	31656.8	551.378	30.3716	1.52899	6.51174e-203	1.7178e-199	Null_Model_OpenChrom	human
DNaseClusters	HCM	Dnase	36331	142340	0.255241	21918.6	474.617	30.3664	1.65754	7.63152e-203	2.0132e-199	Null_Model_OpenChrom	human
DNaseI_Duke	Fibrobl_GM03348	Dnase	38876	142340	0.273121	23566.5	504.176	30.3654	1.64963	7.8657e-203	2.07497e-199	Null_Model_OpenChrom	human
DNaseI_Duke	Naive_B_cell	Dnase	31516	142340	0.221414	17735.5	453.859	30.3629	1.777	8.49176e-203	2.24013e-199	Null_Model_OpenChrom	human
DNaseI_Duke	HPDE6-E6E7	Dnase	36474	142340	0.256246	21436.6	495.359	30.3566	1.70149	1.02646e-202	2.70781e-199	Null_Model_OpenChrom	human
Roadmapepigenomics_Dnase_narrow	Gastric	Dnase	32722	142340	0.229886	19555.2	433.995	30.3387	1.67332	1.77339e-202	4.6782e-199	Null_Model_OpenChrom	human
DNaseI_Duke	SK-N-SH	Dnase	37960	142340	0.266685	23016.6	493.288	30.2935	1.64925	6.97848e-202	1.84092e-198	Null_Model_OpenChrom	human
DNaseClusters	PanIsletD	Dnase	37493	142340	0.263405	23284.6	469.226	30.2805	1.61021	1.03573e-201	2.73227e-198	Null_Model_OpenChrom	human
DNaseI_Duke	FibroP_AG08395	Dnase	38005	142340	0.267002	23297.3	485.752	30.2781	1.6313	1.11189e-201	2.93317e-198	Null_Model_OpenChrom	human
DNaseI_Duke	Melano	Dnase	33670	142340	0.236546	20014.1	451.049	30.2758	1.68231	1.19426e-201	3.15045e-198	Null_Model_OpenChrom	human
Roadmapepigenomics_Histone_narrow	CD56_Primary_Cells	H3K9me3	11704	142340	0.0822257	4546.28	236.484	30.2673	2.57441	1.54447e-201	4.07431e-198	Null_Model_OpenChrom	human
DNaseClusters	HAc	Dnase	33834	142340	0.237698	20324.9	446.542	30.2527	1.66466	2.40282e-201	6.33864e-198	Null_Model_OpenChrom	human
DNaseClusters	NHEK	Dnase	37690	142340	0.264789	23492.2	469.498	30.2403	1.60436	3.49635e-201	9.22336e-198	Null_Model_OpenChrom	human
DNaseClusters	HMF	Dnase	33684	142340	0.236645	20430.6	438.318	30.2369	1.6487	3.87349e-201	1.02183e-197	Null_Model_OpenChrom	human
DNaseI_Duke	Fibrobl_GM03348+lenti-MyoD	Dnase	38055	142340	0.267353	23525.9	480.681	30.2261	1.61758	5.38036e-201	1.41934e-197	Null_Model_OpenChrom	human
DNaseI_Duke	Gliobla	Dnase	35688	142340	0.250724	21796.4	459.955	30.202	1.63733	1.11365e-200	2.93781e-197	Null_Model_OpenChrom	human
DNaseClusters	HCPEpiC	Dnase	38093	142340	0.26762	23534.7	482.086	30.1986	1.61859	1.2362e-200	3.26109e-197	Null_Model_OpenChrom	human
Roadmapepigenomics_Dnase_narrow	CD3_Primary_Cells_Cord_BI	Dnase	36724	142340	0.258002	23061.1	452.511	30.1935	1.59247	1.44e-200	3.79872e-197	Null_Model_OpenChrom	human
DNaseI_Duke	HeLa-S3	Dnase	39219	142340	0.27553	24969.7	472.028	30.1874	1.57066	1.73286e-200	4.57129e-197	Null_Model_OpenChrom	human
DNaseClusters	GM12892	Dnase	31227	142340	0.219383	18508.8	421.429	30.1787	1.68714	2.25403e-200	5.94612e-197	Null_Model_OpenChrom	human
DNaseClusters	AoSMC+serum_free_media	Dnase	31511	142340	0.221378	18954.1	416.499	30.1487	1.66249	5.58431e-200	1.47314e-196	Null_Model_OpenChrom	human
DNaseI_Duke	Fibrobl_GM03348+lenti-control	Dnase	37537	142340	0.263714	23354.1	470.972	30.114	1.60729	1.58767e-199	4.18827e-196	Null_Model_OpenChrom	human
DNaseI_Duke	K562+NaBut	Dnase	37522	142340	0.263608	23219.6	475.208	30.0971	1.61596	2.64503e-199	6.9776e-196	Null_Model_OpenChrom	human
Roadmapepigenomics_Dnase_narrow	Small_Intestine	Dnase	43152	142340	0.303161	27975.2	504.289	30.0954	1.54251	2.78681e-199	7.35159e-196	Null_Model_OpenChrom	human
DNaseClusters	AG09319	Dnase	27794	142340	0.195265	16279.4	382.671	30.0902	1.70732	3.25386e-199	8.58368e-196	Null_Model_OpenChrom	human
DNaseClusters	AG04450	Dnase	28633	142340	0.201159	17082.7	383.981	30.0804	1.67614	4.37574e-199	1.15432e-195	Null_Model_OpenChrom	human
DNaseClusters	WI-38	Dnase	31155	142340	0.218877	18820.4	410.301	30.0624	1.65539	7.52231e-199	1.98439e-195	Null_Model_OpenChrom	human
DNaseClusters	LNCaP	Dnase	43487	142340	0.305515	28911.7	485.108	30.0454	1.50413	1.25186e-198	3.30241e-195	Null_Model_OpenChrom	human
Roadmapepigenomics_Dnase_narrow	Fetal_Brain_Male	Dnase	41219	142340	0.289581	27403.5	460.921	29.9737	1.50415	1.07903e-197	2.84647e-194	Null_Model_OpenChrom	human
Roadmapepigenomics_Dnase_narrow	Fetal_Brain_Female	Dnase	42245	142340	0.296789	28126.9	471.173	29.9638	1.50195	1.45476e-197	3.83765e-194	Null_Model_OpenChrom	human
DNaseI_Duke	GM12878	Dnase	37526	142340	0.263636	23821.3	457.622	29.9475	1.57531	2.36792e-197	6.24658e-194	Null_Model_OpenChrom	human
DNaseClusters	AoAF	Dnase	32042	142340	0.225109	19832.2	407.754	29.9441	1.61566	2.62652e-197	6.92877e-194	Null_Model_OpenChrom	human
DNaseClusters	PanIslets	Dnase	31789	142340	0.223331	19775.4	401.307	29.9361	1.6075	3.33663e-197	8.80203e-194	Null_Model_OpenChrom	human
DNaseClusters	RPTEC	Dnase	29491	142340	0.207187	18173.5	378.197	29.9249	1.62275	4.66297e-197	1.23009e-193	Null_Model_OpenChrom	human
DNaseI_Duke	FibroP	Dnase	36376	142340	0.255557	23501.1	430.376	29.9156	1.54784	6.17395e-197	1.62869e-193	Null_Model_OpenChrom	human
DNaseI_Duke	HSMM_emb	Dnase	37708	142340	0.264915	24385.6	445.479	29.9057	1.54632	8.28609e-197	2.18587e-193	Null_Model_OpenChrom	human
Roadmapepigenomics_Dnase_narrow	CD56_Primary_Cells	Dnase	36042	142340	0.253211	23355.3	424.341	29.8974	1.5432	1.06341e-196	2.80527e-193	Null_Model_OpenChrom	human
Roadmapepigenomics_Dnase_narrow	HUVEC_Umbilical_Vein_Endothelial_Cells	Dnase	37311	142340	0.262126	24102.9	441.786	29.8971	1.54799	1.07222e-196	2.82853e-193	Null_Model_OpenChrom	human
DNaseClusters	HEEpiC	Dnase	35376	142340	0.248532	22549.3	429.518	29.8629	1.56883	2.98096e-196	7.86377e-193	Null_Model_OpenChrom	human
DNaseClusters	GM06990	Dnase	19542	142340	0.137291	10505.6	302.69	29.8538	1.86016	3.91557e-196	1.03293e-192	Null_Model_OpenChrom	human
DNaseI_Duke	T-47D+Estradiol_10nM_30m	Dnase	49945	142340	0.350885	35183.7	494.522	29.8496	1.41955	4.44849e-196	1.17351e-192	Null_Model_OpenChrom	human
DNaseI_Duke	Olf_neurosphere	Dnase	33106	142340	0.232584	20729.5	414.774	29.8392	1.59705	6.06105e-196	1.5989e-192	Null_Model_OpenChrom	human
Roadmapepigenomics_Histone_narrow	CD14_Primary_Cells	H3K9me3	13541	142340	0.0951314	6424.29	238.592	29.8279	2.10778	8.49854e-196	2.24191e-192	Null_Model_OpenChrom	human
Roadmapepigenomics_Dnase_narrow	Fetal_Thymus	Dnase	44759	142340	0.314451	31015	460.792	29.8269	1.44314	8.76213e-196	2.31145e-192	Null_Model_OpenChrom	human
DNaseI_Duke	AoSMC+serum_free_media	Dnase	31822	142340	0.223563	20270.5	387.36	29.821	1.56986	1.04437e-195	2.75506e-192	Null_Model_OpenChrom	human
DNaseClusters	Adult_CD4_Th0	Dnase	33754	142340	0.237136	21788.3	401.408	29.8093	1.54918	1.48156e-195	3.90836e-192	Null_Model_OpenChrom	human
Roadmapepigenomics_Dnase_narrow	Penis_Foreskin_Melanocyte_Primary_Cells_skin01	Dnase	43828	142340	0.307911	29969.6	464.968	29.805	1.46241	1.68213e-195	4.43745e-192	Null_Model_OpenChrom	human
DNaseClusters	Myometr	Dnase	31123	142340	0.218653	19763	381.305	29.7924	1.57481	2.44731e-195	6.45601e-192	Null_Model_OpenChrom	human
DNaseI_Duke	FibroP_AG08396	Dnase	39165	142340	0.275151	25981.2	442.907	29.7664	1.50743	5.31337e-195	1.40167e-191	Null_Model_OpenChrom	human
DNaseClusters	HPdLF	Dnase	30305	142340	0.212906	19156.9	374.732	29.7497	1.58194	8.75036e-195	2.30834e-191	Null_Model_OpenChrom	human
Roadmapepigenomics_Dnase_narrow	H1_BMP4_Derived_Trophoblast_Cultured_Cells	Dnase	34764	142340	0.244232	22773.3	403.096	29.7466	1.52653	9.59652e-195	2.53156e-191	Null_Model_OpenChrom	human
DNaseClusters	HA-h	Dnase	34566	142340	0.242841	22365.8	410.143	29.7463	1.54549	9.68261e-195	2.55427e-191	Null_Model_OpenChrom	human
DNaseClusters	HBMEC	Dnase	34130	142340	0.239778	22481.8	391.778	29.7315	1.51811	1.50276e-194	3.96428e-191	Null_Model_OpenChrom	human
Roadmapepigenomics_Dnase_narrow	HepG2_Hepatocellular_Carcinoma	Dnase	38449	142340	0.270121	26091.5	416.016	29.7043	1.47362	3.37437e-194	8.90159e-191	Null_Model_OpenChrom	human
Roadmapepigenomics_Histone_narrow	Penis_Foreskin_Fibroblast_Primary_Cells_skin01	H3K9me3	21402	142340	0.150358	11972.4	317.452	29.7042	1.78762	3.39197e-194	8.94801e-191	Null_Model_OpenChrom	human
DNaseClusters	ProgFib	Dnase	36696	142340	0.257805	24263.8	418.538	29.7038	1.51238	3.42909e-194	9.04594e-191	Null_Model_OpenChrom	human
DNaseI_Duke	GM10248	Dnase	37616	142340	0.264269	24758	433.15	29.6849	1.51935	6.01542e-194	1.58687e-190	Null_Model_OpenChrom	human
Roadmapepigenomics_Histone_narrow	Duodenum_Mucosa	H3K9me3	7889	142340	0.0554236	3131.35	160.582	29.6275	2.51936	3.30722e-193	8.72444e-190	Null_Model_OpenChrom	human
DNaseClusters	AG10803	Dnase	30712	142340	0.215765	19545.9	377.286	29.5957	1.57127	8.48307e-193	2.23783e-189	Null_Model_OpenChrom	human
DNaseClusters	FibroP	Dnase	38758	142340	0.272292	26616.9	410.404	29.5833	1.45614	1.22456e-192	3.23038e-189	Null_Model_OpenChrom	human
DNaseI_Duke	Huh-7.5	Dnase	42182	142340	0.296347	29798.3	419.261	29.5369	1.41558	4.84003e-192	1.2768e-188	Null_Model_OpenChrom	human
Roadmapepigenomics_Histone_narrow	Penis_Foreskin_Fibroblast_Primary_Cells_skin02	H3K9me3	16546	142340	0.116243	8879.86	259.702	29.519	1.86332	8.2148e-192	2.16706e-188	Null_Model_OpenChrom	human
Roadmapepigenomics_Dnase_narrow	CD14_Primary_Cells	Dnase	31402	142340	0.220613	20630.2	365.005	29.5115	1.52214	1.02626e-191	2.70728e-188	Null_Model_OpenChrom	human
Roadmapepigenomics_Dnase_narrow	K562_Leukemia	Dnase	40513	142340	0.284621	28448.1	409.097	29.4914	1.4241	1.85307e-191	4.8884e-188	Null_Model_OpenChrom	human
DNaseI_Duke	HUVEC	Dnase	37029	142340	0.260145	25328.9	396.881	29.4802	1.46193	2.58321e-191	6.81451e-188	Null_Model_OpenChrom	human
Roadmapepigenomics_Histone_narrow	H9_Cell_Line	H2A.Z	18401	142340	0.129275	10458	269.578	29.4644	1.75951	4.11566e-191	1.08571e-187	Null_Model_OpenChrom	human
Roadmapepigenomics_Histone_narrow	HepG2_Hepatocellular_Carcinoma	H3K9me3	4845	142340	0.0340382	1665.58	107.937	29.4562	2.9089	5.2467e-191	1.38408e-187	Null_Model_OpenChrom	human
DNaseI_Duke	PanIsletD	Dnase	37347	142340	0.262379	25487.7	402.718	29.4482	1.4653	6.6354e-191	1.75042e-187	Null_Model_OpenChrom	human
Roadmapepigenomics_Dnase_narrow	CD3_Primary_Cells_Peripheral_UWUW	Dnase	38668	142340	0.271659	26779.9	403.838	29.4378	1.44392	9.01415e-191	2.37793e-187	Null_Model_OpenChrom	human
DNaseI_Duke	GM19240	Dnase	36070	142340	0.253407	24969.4	377.8	29.3822	1.44457	4.63302e-190	1.22219e-186	Null_Model_OpenChrom	human
DNaseI_Duke	NHEK	Dnase	35279	142340	0.24785	23909.9	387.595	29.3324	1.4755	2.00434e-189	5.28744e-186	Null_Model_OpenChrom	human
DNaseI_Duke	H1-hESC	Dnase	41872	142340	0.294169	30195.1	398.542	29.299	1.38672	5.33568e-189	1.40755e-185	Null_Model_OpenChrom	human
DNaseI_Duke	Stellate	Dnase	37620	142340	0.264297	26302	386.548	29.2796	1.43031	9.42816e-189	2.48715e-185	Null_Model_OpenChrom	human
Roadmapepigenomics_Dnase_narrow	HeLa-S3_Cervical_Carcinoma	Dnase	36814	142340	0.258634	25502.8	386.319	29.2794	1.44353	9.48624e-189	2.50247e-185	Null_Model_OpenChrom	human
Roadmapepigenomics_Dnase_narrow	Fetal_Placenta	Dnase	50182	142340	0.35255	37350.3	438.386	29.2704	1.34355	1.23645e-188	3.26175e-185	Null_Model_OpenChrom	human
DNaseI_Duke	ProgFib	Dnase	35923	142340	0.252375	24582.5	387.453	29.2693	1.46132	1.27687e-188	3.36838e-185	Null_Model_OpenChrom	human
DNaseI_Duke	Fibrobl	Dnase	29938	142340	0.210327	19670.6	350.802	29.2683	1.52196	1.31481e-188	3.46846e-185	Null_Model_OpenChrom	human
DNaseClusters	Medullo	Dnase	32594	142340	0.228987	22249.4	353.484	29.2646	1.46494	1.46541e-188	3.86576e-185	Null_Model_OpenChrom	human
DNaseI_Duke	Cerebellum_OC	Dnase	32727	142340	0.229921	21895.7	370.281	29.2515	1.49467	2.14801e-188	5.66644e-185	Null_Model_OpenChrom	human
Roadmapepigenomics_Histone_narrow	Left_Ventricle	H3K9me3	7629	142340	0.053597	3247.92	149.906	29.2255	2.34889	4.59922e-188	1.21327e-184	Null_Model_OpenChrom	human
Roadmapepigenomics_Dnase_narrow	CD19_Primary_Cells_Peripheral_UW	Dnase	37576	142340	0.263988	26682.3	372.82	29.2196	1.40827	5.46994e-188	1.44297e-184	Null_Model_OpenChrom	human
DNaseClusters	HRPEpiC	Dnase	33509	142340	0.235415	22855.1	364.623	29.2191	1.46615	5.5468e-188	1.46325e-184	Null_Model_OpenChrom	human
DNaseClusters	SAEC	Dnase	31640	142340	0.222285	21544.6	345.544	29.2159	1.46858	6.09036e-188	1.60664e-184	Null_Model_OpenChrom	human
DNaseClusters	HGF	Dnase	25772	142340	0.181059	16520.9	317.213	29.1636	1.55996	2.80584e-187	7.40182e-184	Null_Model_OpenChrom	human
DNaseI_Duke	GM20000	Dnase	38630	142340	0.271392	27252.7	390.164	29.1603	1.41747	3.09214e-187	8.15707e-184	Null_Model_OpenChrom	human
DNaseClusters	AG09309	Dnase	33091	142340	0.232479	22591.8	360.079	29.1579	1.46473	3.31266e-187	8.73879e-184	Null_Model_OpenChrom	human
Roadmapepigenomics_Dnase_narrow	Fetal_Stomach	Dnase	45324	142340	0.318421	33623.8	401.583	29.1353	1.34798	6.41427e-187	1.69209e-183	Null_Model_OpenChrom	human
Roadmapepigenomics_Histone_narrow	IMR90_Cell_Line	H3K9me3	17509	142340	0.123008	10361.9	245.384	29.126	1.68974	8.42252e-187	2.22186e-183	Null_Model_OpenChrom	human
DNaseClusters	HRCEpiC	Dnase	31298	142340	0.219882	21112.8	349.772	29.1196	1.48242	1.01357e-186	2.67379e-183	Null_Model_OpenChrom	human
Roadmapepigenomics_Histone_narrow	Fetal_Placenta	H3K9me3	9740	142340	0.0684277	4699.87	173.133	29.1114	2.0724	1.28924e-186	3.40102e-183	Null_Model_OpenChrom	human
Roadmapepigenomics_Histone_narrow	Adult_Liver	H3K9me3	8990	142340	0.0631586	4305.07	161.017	29.0959	2.08824	2.02095e-186	5.33127e-183	Null_Model_OpenChrom	human
DNaseClusters	HRE	Dnase	31017	142340	0.217908	21112.5	340.526	29.0857	1.46913	2.71857e-186	7.17159e-183	Null_Model_OpenChrom	human
Roadmapepigenomics_Dnase_narrow	Pancreas	Dnase	39282	142340	0.275973	28412.9	373.764	29.0802	1.38254	3.1959e-186	8.43079e-183	Null_Model_OpenChrom	human
Roadmapepigenomics_Histone_narrow	Adipose_Nuclei	H3K9me3	7780	142340	0.0546579	3515.14	146.684	29.0752	2.21328	3.69148e-186	9.73811e-183	Null_Model_OpenChrom	human
DNaseClusters	HSMMtube	Dnase	45497	142340	0.319636	33916.7	398.555	29.0557	1.34143	6.52645e-186	1.72168e-182	Null_Model_OpenChrom	human
DNaseI_Duke	iPS	Dnase	44354	142340	0.311606	32876.3	396.322	28.9606	1.34912	1.03222e-184	2.72299e-181	Null_Model_OpenChrom	human
DNaseClusters	HCFaa	Dnase	30181	142340	0.212035	20449.8	336.301	28.9361	1.47586	2.09797e-184	5.53445e-181	Null_Model_OpenChrom	human
Roadmapepigenomics_Histone_narrow	Osteoblasts	H3K9me3	6145	142340	0.0431713	2518.57	125.368	28.9263	2.43988	2.78959e-184	7.35895e-181	Null_Model_OpenChrom	human
Roadmapepigenomics_Dnase_narrow	Monocytes-CD14+_RO01746	Dnase	36088	142340	0.253534	25564.5	363.906	28.9181	1.41164	3.53725e-184	9.33127e-181	Null_Model_OpenChrom	human
Roadmapepigenomics_Histone_narrow	Penis_Foreskin_Keratinocyte_Primary_Cells_skin03	H3K9me3	11992	142340	0.084249	6461.15	191.447	28.8897	1.85602	8.04807e-184	2.12308e-180	Null_Model_OpenChrom	human
Roadmapepigenomics_Histone_narrow	Fetal_Intestine_Small	H3K9me3	12719	142340	0.0893565	6977.51	198.799	28.8808	1.82286	1.03974e-183	2.74285e-180	Null_Model_OpenChrom	human
DNaseClusters	Melano	Dnase	37226	142340	0.261529	26837.2	359.869	28.8683	1.3871	1.49521e-183	3.94436e-180	Null_Model_OpenChrom	human
Roadmapepigenomics_Histone_narrow	Aorta	H3K9me3	5846	142340	0.0410707	2447.3	117.84	28.8416	2.38875	3.2289e-183	8.51783e-180	Null_Model_OpenChrom	human
DNaseClusters	HNPCEpiC	Dnase	33517	142340	0.235471	23663.9	342.062	28.8049	1.41638	9.30119e-183	2.45365e-179	Null_Model_OpenChrom	human
Roadmapepigenomics_Dnase_narrow	GM12878_Lymphoblastoid	Dnase	37310	142340	0.262119	27140	353.258	28.7893	1.37473	1.46121e-182	3.85468e-179	Null_Model_OpenChrom	human
Roadmapepigenomics_Histone_narrow	Peripheral_Blood_Mononuclear_Primary_Cells	H3K9me3	6173	142340	0.043368	2625.73	123.26	28.7788	2.35097	1.97732e-182	5.21618e-179	Null_Model_OpenChrom	human
Roadmapepigenomics_Histone_narrow	Breast_Myoepithelial_Cells	H3K9me3	11505	142340	0.0808276	6113.45	187.521	28.7517	1.88192	4.31468e-182	1.13821e-178	Null_Model_OpenChrom	human
DNaseI_Duke	GM19238	Dnase	36647	142340	0.257461	26429.3	355.457	28.7453	1.38661	5.18312e-182	1.36731e-178	Null_Model_OpenChrom	human
Roadmapepigenomics_Dnase_narrow	HMEC_Mammary_Epithelial	Dnase	39355	142340	0.276486	28967.3	361.422	28.7413	1.3586	5.82035e-182	1.53541e-178	Null_Model_OpenChrom	human
DNaseClusters	NHDF-neo	Dnase	29823	142340	0.209519	20495	325.031	28.6987	1.45513	1.97816e-181	5.2184e-178	Null_Model_OpenChrom	human
DNaseClusters	Caco-2	Dnase	21321	142340	0.149789	13731.5	264.918	28.6485	1.55271	8.35859e-181	2.205e-177	Null_Model_OpenChrom	human
Roadmapepigenomics_Histone_narrow	Breast_vHMEC	H3K9me3	8283	142340	0.0581917	4026.22	148.671	28.6323	2.05727	1.33086e-180	3.5108e-177	Null_Model_OpenChrom	human
Roadmapepigenomics_Histone_narrow	Pancreas	H3K9me3	14399	142340	0.101159	8492.24	206.641	28.5846	1.69555	5.21846e-180	1.37663e-176	Null_Model_OpenChrom	human
DNaseI_Duke	GM10266	Dnase	37921	142340	0.266411	27633	360.025	28.576	1.37231	6.68336e-180	1.76307e-176	Null_Model_OpenChrom	human
DNaseI_Duke	MCF7+CTCF_shRNA_knockdown	Dnase	26391	142340	0.185408	18014	293.313	28.5599	1.46503	1.0576e-179	2.78996e-176	Null_Model_OpenChrom	human
Roadmapepigenomics_Histone_narrow	Esophagus	H3K9me3	14421	142340	0.101314	8529.65	206.346	28.5509	1.69069	1.37029e-179	3.61482e-176	Null_Model_OpenChrom	human
Roadmapepigenomics_Histone_narrow	Mobilized_CD34_Primary_Cells_Male	H3K9me3	11153	142340	0.0783546	6372.03	167.621	28.5225	1.75031	3.08125e-179	8.12833e-176	Null_Model_OpenChrom	human
Roadmapepigenomics_Dnase_narrow	Fetal_Heart	Dnase	49786	142340	0.349768	38624.5	391.521	28.5079	1.28897	4.66941e-179	1.23179e-175	Null_Model_OpenChrom	human
DNaseI_Duke	LNCap+androgen	Dnase	39255	142340	0.275783	29143.1	354.86	28.4954	1.34697	6.67776e-179	1.76159e-175	Null_Model_OpenChrom	human
Roadmapepigenomics_Histone_narrow	CD4+_CD25+_CD127-_Treg_Primary_CellsTh	H3K9me3	6040	142340	0.0424336	2672.53	118.184	28.4934	2.26003	7.07991e-179	1.86768e-175	Null_Model_OpenChrom	human
DNaseClusters	AG04449	Dnase	26891	142340	0.188921	18809.3	283.734	28.4833	1.42966	9.4286e-179	2.48726e-175	Null_Model_OpenChrom	human
DNaseClusters	HAEpiC	Dnase	31130	142340	0.218702	22304.2	310.14	28.4575	1.3957	1.96809e-178	5.19182e-175	Null_Model_OpenChrom	human
Roadmapepigenomics_Histone_narrow	H1_Cell_Line	H2A.Z	22141	142340	0.15555	14847.1	256.347	28.4534	1.49127	2.212e-178	5.83527e-175	Null_Model_OpenChrom	human
DNaseI_Duke	Adult_CD4_Th0	Dnase	33313	142340	0.234038	24365.2	314.502	28.4507	1.36724	2.39055e-178	6.30626e-175	Null_Model_OpenChrom	human
DNaseClusters	HVMF	Dnase	26913	142340	0.189075	18948.9	279.972	28.446	1.42029	2.73193e-178	7.20684e-175	Null_Model_OpenChrom	human
Roadmapepigenomics_Histone_narrow	Brain_Hippocampus_Middle	H3K9me3	5450	142340	0.0382886	2348.38	109.136	28.4198	2.32075	5.75386e-178	1.51787e-174	Null_Model_OpenChrom	human
DNaseI_Duke	GM13977	Dnase	38180	142340	0.268231	28366.2	345.891	28.3726	1.34597	2.20421e-177	5.81469e-174	Null_Model_OpenChrom	human
Roadmapepigenomics_Histone_narrow	Sigmoid_Colon	H3K9me3	5759	142340	0.0404595	2547.05	113.326	28.3427	2.26105	5.15126e-177	1.3589e-173	Null_Model_OpenChrom	human
DNaseI_Duke	HSMM_FSHD	Dnase	37504	142340	0.263482	28327.2	324.348	28.2931	1.32396	2.10306e-176	5.54786e-173	Null_Model_OpenChrom	human
Roadmapepigenomics_Histone_narrow	Lung	H3K9me3	22485	142340	0.157967	15027.5	263.599	28.2911	1.49626	2.2247e-176	5.86876e-173	Null_Model_OpenChrom	human
Roadmapepigenomics_Dnase_narrow	Fetal_Kidney	Dnase	50434	142340	0.354321	39847.4	374.333	28.2813	1.26568	2.93092e-176	7.73175e-173	Null_Model_OpenChrom	human
DNaseI_Duke	8988T	Dnase	40224	142340	0.282591	30717.4	336.701	28.2346	1.30949	1.09921e-175	2.89972e-172	Null_Model_OpenChrom	human
DNaseClusters	HMEC	Dnase	45143	142340	0.317149	34908	362.794	28.2116	1.2932	2.10686e-175	5.55791e-172	Null_Model_OpenChrom	human
DNaseClusters	WI-38+4OHTAM_20nM_72hr	Dnase	30425	142340	0.213749	21960.1	300.652	28.1553	1.38547	1.03057e-174	2.71864e-171	Null_Model_OpenChrom	human
DNaseI_Duke	GM19239	Dnase	38157	142340	0.268069	28613.6	339.144	28.1397	1.33353	1.60013e-174	4.22114e-171	Null_Model_OpenChrom	human
Roadmapepigenomics_Histone_narrow	Brain_Inferior_Temporal_Lobe	H3K9me3	5389	142340	0.0378601	2438.21	104.927	28.1224	2.21023	2.61027e-174	6.88589e-171	Null_Model_OpenChrom	human
Roadmapepigenomics_Histone_narrow	Brain_Anterior_Caudate	H3K9me3	5135	142340	0.0360756	2270.1	101.973	28.0948	2.26202	5.6672e-174	1.49501e-170	Null_Model_OpenChrom	human
Roadmapepigenomics_Dnase_narrow	Fetal_Intestine_Large	Dnase	33571	142340	0.235851	24671.2	317.021	28.0733	1.36074	1.03766e-173	2.73735e-170	Null_Model_OpenChrom	human
DNaseI_Duke	H7-hESC	Dnase	44138	142340	0.310089	34200.3	354.016	28.0714	1.29057	1.09542e-173	2.88973e-170	Null_Model_OpenChrom	human
Roadmapepigenomics_Histone_narrow	HUVEC_Umbilical_Vein_Endothelial_Cells	H3K9me3	7967	142340	0.0559716	4039.68	139.92	28.0683	1.97219	1.19541e-173	3.15349e-170	Null_Model_OpenChrom	human
DNaseClusters	HIPEpiC	Dnase	33634	142340	0.236293	24831.6	314.209	28.0146	1.35449	5.40181e-173	1.425e-169	Null_Model_OpenChrom	human
DNaseI_Duke	GM13976	Dnase	38910	142340	0.27336	29696	330.24	27.901	1.31028	1.29677e-171	3.42088e-168	Null_Model_OpenChrom	human
Misc_Histone	NeutrophilCells	H3K9me3	9441	142340	0.0663271	5227.56	151.621	27.7892	1.806	2.92964e-170	7.7284e-167	Null_Model_OpenChrom	human
Roadmapepigenomics_Dnase_narrow	Breast_vHMEC	Dnase	39691	142340	0.278846	30689	324.328	27.7559	1.29333	7.39957e-170	1.95201e-166	Null_Model_OpenChrom	human
Roadmapepigenomics_Dnase_narrow	H1_Derived_Mesenchymal_Stem_Cells	Dnase	44010	142340	0.309189	34743.8	334.035	27.7402	1.2667	1.14355e-169	3.01668e-166	Null_Model_OpenChrom	human
Roadmapepigenomics_Histone_narrow	Adipose_Derived_Mesenchymal_Stem_Cell_Cultured_Cells	H3K9me3	5070	142340	0.0356189	2349.44	98.1156	27.7281	2.15796	1.60206e-169	4.22623e-166	Null_Model_OpenChrom	human
DNaseI_Duke	T-47D	Dnase	45924	142340	0.322636	36399.1	344.101	27.6806	1.26168	5.97247e-169	1.57554e-165	Null_Model_OpenChrom	human
Roadmapepigenomics_Dnase_narrow	NHEK-Epidermal_Keratinocytes	Dnase	40307	142340	0.283174	31274.4	326.462	27.6682	1.28882	8.41884e-169	2.22089e-165	Null_Model_OpenChrom	human
Roadmapepigenomics_Histone_narrow	Penis_Foreskin_Keratinocyte_Primary_Cells_skin02	H3K9me3	9658	142340	0.0678516	5498.38	150.471	27.6439	1.75652	1.65066e-168	4.35444e-165	Null_Model_OpenChrom	human
Roadmapepigenomics_Histone_narrow	CD4+_CD25-_IL17+_PMA-Ionomcyin_stimulated_Th17_Primary_Cells	H3K9me3	4057	142340	0.0285022	1738.4	83.9433	27.6211	2.33376	3.10794e-168	8.19874e-165	Null_Model_OpenChrom	human
Roadmapepigenomics_Histone_narrow	CD15_Primary_Cellst_	H3K9me3	9346	142340	0.0656597	5211.8	149.688	27.6188	1.79324	3.30674e-168	8.72318e-165	Null_Model_OpenChrom	human
Roadmapepigenomics_Histone_narrow	Duodenum_Smooth_Muscle	H3K9me3	4916	142340	0.034537	2287.23	95.1964	27.6142	2.14933	3.75807e-168	9.91378e-165	Null_Model_OpenChrom	human
DNaseI_Duke	IMR90	Dnase	37856	142340	0.265955	29266.7	311.415	27.5814	1.29348	9.30059e-168	2.4535e-164	Null_Model_OpenChrom	human
Roadmapepigenomics_Histone_narrow	Fetal_Muscle_Leg	H3K9me3	5834	142340	0.0409864	2833	109	27.5322	2.0593	3.61901e-167	9.54695e-164	Null_Model_OpenChrom	human
Roadmapepigenomics_Histone_narrow	Brain_Germinal_Matrix	H3K9me3	7279	142340	0.0511381	3909.19	122.588	27.4889	1.86202	1.19198e-166	3.14445e-163	Null_Model_OpenChrom	human
Roadmapepigenomics_Histone_narrow	CD4+_CD25-_Th_Primary_Cells-I	H3K9me3	5014	142340	0.0352255	2359.61	96.59	27.481	2.12493	1.48108e-166	3.9071e-163	Null_Model_OpenChrom	human
Roadmapepigenomics_Histone_narrow	Brain_Substantia_Nigra	H3K9me3	4502	142340	0.0316285	2047.72	89.3442	27.4699	2.19854	2.00788e-166	5.29679e-163	Null_Model_OpenChrom	human
Roadmapepigenomics_Histone_narrow	Right_Atrium	H3K36me3	18617	142340	0.130792	12605.5	219.251	27.4184	1.47689	8.28116e-166	2.18457e-162	Null_Model_OpenChrom	human
Roadmapepigenomics_Histone_narrow	Rectal_Mucosa.Donor_31	H3K9me3	3981	142340	0.0279682	1767.22	80.7679	27.4092	2.25269	1.0656e-165	2.81105e-162	Null_Model_OpenChrom	human
Roadmapepigenomics_Histone_narrow	Brain_Mid_Frontal_Lobe	H3K9me3	5099	142340	0.0358227	2430.9	97.3649	27.4032	2.09758	1.25767e-165	3.31774e-162	Null_Model_OpenChrom	human
DNaseClusters	NHDF-Ad	Dnase	32363	142340	0.227364	24544.6	286.02	27.3353	1.31854	8.08314e-165	2.13233e-161	Null_Model_OpenChrom	human
Roadmapepigenomics_Histone_narrow	Psoas_Muscle	H3K9me3	3650	142340	0.0256428	1535.8	77.4958	27.2815	2.37661	3.51882e-164	9.28266e-161	Null_Model_OpenChrom	human
Roadmapepigenomics_Histone_narrow	H1_Derived_Mesenchymal_Stem_Cells	H2A.Z	23145	142340	0.162604	16481.6	245.014	27.1961	1.40429	3.61207e-163	9.52865e-160	Null_Model_OpenChrom	human
Roadmapepigenomics_Dnase_narrow	Fetal_Muscle_Trunk	Dnase	46613	142340	0.327476	37881.5	321.195	27.1843	1.23049	4.98426e-163	1.31485e-159	Null_Model_OpenChrom	human
Roadmapepigenomics_ActiveChromatin	Chondrocytes_from_Bone_Marrow_Derived_Mesenchymal_Stem_Cell	1_TssA	11322	142340	0.0795419	7065.63	156.709	27.1609	1.6024	9.41581e-163	2.48389e-159	Null_Model_OpenChrom	human
Roadmapepigenomics_ActiveChromatin	CD4+_CD25-_Th_Primary	1_TssA	7642	142340	0.0536884	4277.36	124.145	27.1024	1.78662	4.61046e-162	1.21624e-158	Null_Model_OpenChrom	human
DNaseI_Duke	HMEC	Dnase	37506	142340	0.263496	29189.2	307.068	27.0845	1.28493	7.49237e-162	1.97649e-158	Null_Model_OpenChrom	human
DNaseI_Duke	Cerebrum_frontal_OC	Dnase	38460	142340	0.270198	30303.9	301.494	27.0524	1.26915	1.78919e-161	4.71988e-158	Null_Model_OpenChrom	human
Roadmapepigenomics_Histone_narrow	Gastric	H3K9me3	8108	142340	0.0569622	4639.09	128.308	27.0359	1.74776	2.7974e-161	7.37954e-158	Null_Model_OpenChrom	human
DNaseI_Duke	Hsmmtube	Dnase	39068	142340	0.27447	30985.8	299.039	27.0274	1.26084	3.52007e-161	9.28596e-158	Null_Model_OpenChrom	human
Roadmapepigenomics_Histone_narrow	Fetal_Thymus	H3K9me3	16552	142340	0.116285	11347.7	192.991	26.9668	1.45863	1.81006e-160	4.77493e-157	Null_Model_OpenChrom	human
Roadmapepigenomics_Histone_narrow	Chondrocytes_from_Bone_Marrow_Derived_Mesenchymal_Stem_Cell_Cultured_Cells	H3K9me3	7106	142340	0.0499227	3939.61	117.438	26.9622	1.80373	2.05183e-160	5.41273e-157	Null_Model_OpenChrom	human
DNaseI_Duke	CLL	Dnase	31353	142340	0.220268	24221.1	265.691	26.8427	1.29445	5.13526e-159	1.35468e-155	Null_Model_OpenChrom	human
Roadmapepigenomics_Dnase_narrow	IMR90_Cell_Line	Dnase	42711	142340	0.300063	34704.1	298.76	26.8005	1.23072	1.59383e-158	4.20452e-155	Null_Model_OpenChrom	human
DNaseClusters	pHTE	Dnase	36914	142340	0.259337	29342.5	282.795	26.7737	1.25804	3.27418e-158	8.63729e-155	Null_Model_OpenChrom	human
DNaseClusters	Chorion	Dnase	26606	142340	0.186919	20112.6	242.534	26.7731	1.32285	3.3219e-158	8.76316e-155	Null_Model_OpenChrom	human
Roadmapepigenomics_Histone_narrow	Brain_Cingulate_Gyrus	H3K9me3	3766	142340	0.0264578	1731.87	76.2268	26.6853	2.17453	3.48883e-157	9.20352e-154	Null_Model_OpenChrom	human
DNaseClusters	PrEC	Dnase	24687	142340	0.173437	18391	236.184	26.6572	1.34234	7.37583e-157	1.94574e-153	Null_Model_OpenChrom	human
Roadmapepigenomics_Histone_narrow	Skeletal_Muscle_Female	H3K9me3	4282	142340	0.0300829	2091.54	82.3507	26.5992	2.0473	3.46497e-156	9.14059e-153	Null_Model_OpenChrom	human
Roadmapepigenomics_Histone_narrow	Monocytes-CD14+_RO01746	H3K9me3	12449	142340	0.0874596	8157.76	161.404	26.5869	1.52603	4.81434e-156	1.27002e-152	Null_Model_OpenChrom	human
DNaseClusters	Th1	Dnase	37812	142340	0.265646	30471.7	276.585	26.539	1.24089	1.718e-155	4.53207e-152	Null_Model_OpenChrom	human
Roadmapepigenomics_ActiveChromatin	CD4+_CD25-_CD45RA+_Naive_Primary	1_TssA	8425	142340	0.0591893	5116.93	124.692	26.53	1.6465	2.18279e-155	5.7582e-152	Null_Model_OpenChrom	human
Roadmapepigenomics_Histone_narrow	HUES64_Cell_Line	H3K9me3	7871	142340	0.0552972	4590.07	123.726	26.5178	1.71479	3.02301e-155	7.97469e-152	Null_Model_OpenChrom	human
DNaseI_Duke	Heart_OC	Dnase	35782	142340	0.251384	28484.7	275.416	26.4954	1.25618	5.47394e-155	1.44402e-151	Null_Model_OpenChrom	human
Roadmapepigenomics_ActiveChromatin	CD15_Primary	1_TssA	6295	142340	0.0442251	3482.04	107.277	26.2215	1.80785	7.56555e-152	1.99579e-148	Null_Model_OpenChrom	human
Roadmapepigenomics_Histone_narrow	IMR90_Cell_Line	H2A.Z	21226	142340	0.149122	15813.9	206.608	26.195	1.34224	1.51436e-151	3.99489e-148	Null_Model_OpenChrom	human
Roadmapepigenomics_ActiveChromatin	CD19_Primary_Peripheral_UW	1_TssA	7412	142340	0.0520725	4437.38	113.758	26.1487	1.67035	5.09744e-151	1.34471e-147	Null_Model_OpenChrom	human
Roadmapepigenomics_Histone_narrow	Skeletal_Muscle_Male	H3K9me3	5041	142340	0.0354152	2644.85	91.6628	26.141	1.90597	6.24187e-151	1.64661e-147	Null_Model_OpenChrom	human
DNaseClusters	BJ	Dnase	24332	142340	0.170943	18405.7	227.176	26.0868	1.32198	2.5711e-150	6.78257e-147	Null_Model_OpenChrom	human
Roadmapepigenomics_Histone_narrow	HeLa-S3_Cervical_Carcinoma	H2A.Z	17233	142340	0.121069	12461.3	183.136	26.0555	1.38292	5.82526e-150	1.5367e-146	Null_Model_OpenChrom	human
Roadmapepigenomics_Histone_narrow	Rectal_Mucosa.Donor_29	H3K9me3	3998	142340	0.0280877	1904.84	80.3624	26.0465	2.09886	7.36883e-150	1.9439e-146	Null_Model_OpenChrom	human
Roadmapepigenomics_Histone_narrow	hESC_Derived_CD184+_Endoderm_Cultured_Cells	H3K9me3	8972	142340	0.0630322	5578.77	130.493	26.0031	1.60824	2.28132e-149	6.01811e-146	Null_Model_OpenChrom	human
Roadmapepigenomics_ActiveChromatin	CD34_Primary	1_TssA	6857	142340	0.0481734	4011.34	109.605	25.9628	1.7094	6.52213e-149	1.72054e-145	Null_Model_OpenChrom	human
Roadmapepigenomics_Dnase_narrow	Ovary	Dnase	39283	142340	0.27598	32153.9	275.331	25.8929	1.22172	4.005e-148	1.05652e-144	Null_Model_OpenChrom	human
Roadmapepigenomics_Histone_narrow	Dnd41_TCell_Leukemia	H2A.Z	15093	142340	0.106035	10702.7	169.556	25.8927	1.4102	4.02793e-148	1.06257e-144	Null_Model_OpenChrom	human
DNaseI_Duke	Myometr	Dnase	34752	142340	0.244148	27721.7	271.793	25.8666	1.2536	7.92136e-148	2.08966e-144	Null_Model_OpenChrom	human
Roadmapepigenomics_Histone_narrow	Brain_Angular_Gyrus	H3K9me3	3087	142340	0.0216875	1434.8	63.9308	25.8436	2.15152	1.4369e-147	3.79055e-144	Null_Model_OpenChrom	human
Roadmapepigenomics_Histone_narrow	H9_Derived_Neuronal_Progenitor_Cultured_Cells	H2A.Z	29144	142340	0.204749	23116.3	233.565	25.8073	1.26075	3.67228e-147	9.68747e-144	Null_Model_OpenChrom	human
DNaseClusters	HSMM	Dnase	39667	142340	0.278678	32758.8	268.185	25.7589	1.21088	1.28008e-146	3.37684e-143	Null_Model_OpenChrom	human
Roadmapepigenomics_Histone_narrow	Right_Ventricle	H3K9me3	2484	142340	0.0174512	1041.04	56.0609	25.7392	2.38608	2.13092e-146	5.62138e-143	Null_Model_OpenChrom	human
Roadmapepigenomics_Dnase_narrow	Fetal_Lung	Dnase	49503	142340	0.34778	41749	301.259	25.7388	1.18573	2.15124e-146	5.67497e-143	Null_Model_OpenChrom	human
Roadmapepigenomics_Histone_narrow	Fetal_Lung	H3K9me3	4152	142340	0.0291696	2134.13	78.4796	25.712	1.94552	4.29015e-146	1.13174e-142	Null_Model_OpenChrom	human
Roadmapepigenomics_Histone_narrow	CD4+_CD25-_CD45RO+_Memory_Primary_Cells	H3K9me3	3262	142340	0.022917	1525.86	67.5325	25.7082	2.13781	4.72891e-146	1.24749e-142	Null_Model_OpenChrom	human
Roadmapepigenomics_Histone_narrow	Fetal_Brain_Female	H3K9me3	4782	142340	0.0335956	2535.8	87.5057	25.6692	1.8858	1.28946e-145	3.40159e-142	Null_Model_OpenChrom	human
Roadmapepigenomics_Histone_narrow	Mobilized_CD34_Primary_Cells_Female	H3K9me3	7541	142340	0.0529788	4588.54	115.133	25.644	1.64344	2.46457e-145	6.50154e-142	Null_Model_OpenChrom	human
Roadmapepigenomics_ActiveChromatin	CD3_Primary_Cord_BI	1_TssA	9642	142340	0.0677392	6242.04	132.63	25.6349	1.54469	3.11607e-145	8.2202e-142	Null_Model_OpenChrom	human
Roadmapepigenomics_Histone_narrow	H9_Derived_Neuron_Cultured_Cells	H2A.Z	19088	142340	0.134101	14221.7	190.093	25.5993	1.34217	7.76019e-145	2.04714e-141	Null_Model_OpenChrom	human
DNaseI_Duke	Adult_CD4_Th1	Dnase	32289	142340	0.226844	25999.2	246.027	25.5656	1.24192	1.83917e-144	4.85174e-141	Null_Model_OpenChrom	human
Roadmapepigenomics_Histone_narrow	Fetal_Muscle_Trunk	H3K9me3	3575	142340	0.0251159	1842.55	67.7836	25.5585	1.94025	2.20711e-144	5.82234e-141	Null_Model_OpenChrom	human
Roadmapepigenomics_Histone_narrow	A549_EtOH_0.02pct_Lung_Carcinoma	H2A.Z	21243	142340	0.149241	16064.6	202.723	25.5441	1.32235	3.19397e-144	8.42569e-141	Null_Model_OpenChrom	human
Roadmapepigenomics_Histone_narrow	NHLF_Lung_Fibroblasts	H2A.Z	16512	142340	0.116004	11974.3	178.179	25.467	1.37895	2.28651e-143	6.0318e-140	Null_Model_OpenChrom	human
Roadmapepigenomics_Histone_narrow	Dnd41_TCell_Leukemia	H3K9me3	6290	142340	0.04419	3661.08	103.341	25.4393	1.71807	4.63944e-143	1.22389e-139	Null_Model_OpenChrom	human
Roadmapepigenomics_Histone_narrow	CD8_Naive_Primary_Cells	H3K9me3	2909	142340	0.020437	1374.65	60.3667	25.4172	2.11618	8.13548e-143	2.14614e-139	Null_Model_OpenChrom	human
Roadmapepigenomics_ActiveChromatin	Adipose_Nuclei	1_TssA	8769	142340	0.061606	5541.76	126.984	25.4144	1.58235	8.73398e-143	2.30402e-139	Null_Model_OpenChrom	human
DNaseI_Duke	pHTC	Dnase	34259	142340	0.240684	27929	249.226	25.3985	1.22664	1.31057e-142	3.45729e-139	Null_Model_OpenChrom	human
Roadmapepigenomics_Histone_narrow	NHDF-Ad_Adult_Dermal_Fibroblasts	H2A.Z	15505	142340	0.108929	11290.5	166.027	25.3847	1.37328	1.86286e-142	4.91423e-139	Null_Model_OpenChrom	human
AlleleSpecificBinding	GM12878	none	1032	142340	0.00725025	296.419	28.9798	25.3825	3.48156	1.96702e-142	5.189e-139	Null_Model_OpenChrom	human
DNaseI_Duke	Panislets	Dnase	34677	142340	0.243621	27895.5	267.243	25.3757	1.2431	2.33715e-142	6.16539e-139	Null_Model_OpenChrom	human
Roadmapepigenomics_Histone_narrow	Spleen	H3K9me3	15748	142340	0.110637	11512.7	166.936	25.3711	1.36789	2.62905e-142	6.93543e-139	Null_Model_OpenChrom	human
Roadmapepigenomics_Histone_narrow	Fetal_Stomach	H3K9me3	14332	142340	0.100688	10187.6	163.375	25.3671	1.4068	2.91318e-142	7.68496e-139	Null_Model_OpenChrom	human
Roadmapepigenomics_Histone_narrow	Mesenchymal_Stem_Cell_Derived_Adipocyte_Cultured_Cells	H3K9me3	5671	142340	0.0398412	3283.42	94.1291	25.365	1.72716	3.07355e-142	8.10801e-139	Null_Model_OpenChrom	human
DNaseI_Duke	Medullo	Dnase	32875	142340	0.230961	26702.5	243.394	25.3602	1.23116	3.46436e-142	9.13897e-139	Null_Model_OpenChrom	human
Roadmapepigenomics_ActiveChromatin	CD14_Primary	1_TssA	7138	142340	0.0501475	4357.44	109.728	25.3404	1.63812	5.73383e-142	1.51258e-138	Null_Model_OpenChrom	human
Roadmapepigenomics_ActiveChromatin	Brain_Substantia_Nigra	1_TssA	12931	142340	0.0908459	9039.97	153.634	25.3267	1.43043	8.11454e-142	2.14062e-138	Null_Model_OpenChrom	human
Roadmapepigenomics_ActiveChromatin	CD4+_CD25-_IL17+_PMA-Ionomcyin_stimulated_Th17_Primary	1_TssA	6289	142340	0.0441829	3759.88	100.112	25.2631	1.67266	4.07056e-141	1.07381e-137	Null_Model_OpenChrom	human
Roadmapepigenomics_ActiveChromatin	CD8_Naive_Primary	1_TssA	8930	142340	0.0627371	5762.66	125.534	25.2309	1.54963	9.18149e-141	2.42208e-137	Null_Model_OpenChrom	human
Roadmapepigenomics_Histone_narrow	ES-WA7_Cell_Line	H3K4me3	15769	142340	0.110784	11431.3	172.204	25.1891	1.37946	2.63415e-140	6.9489e-137	Null_Model_OpenChrom	human
Roadmapepigenomics_Histone_narrow	HUES6_Cell_Line	H3K9me3	9979	142340	0.0701068	6546.94	136.389	25.1638	1.52422	4.99339e-140	1.31726e-136	Null_Model_OpenChrom	human
Roadmapepigenomics_Histone_narrow	Colonic_Mucosa	H3K9me3	6656	142340	0.0467613	4045.1	103.787	25.1563	1.64545	6.03384e-140	1.59173e-136	Null_Model_OpenChrom	human
Roadmapepigenomics_Histone_narrow	CD4+_CD25-_IL17-_PMA-Ionomycin_stimulated_MACS_purified_Th_Primary_Cells	H3K9me3	3307	142340	0.0232331	1626.2	66.8436	25.1452	2.03357	7.97451e-140	2.10368e-136	Null_Model_OpenChrom	human
Roadmapepigenomics_ActiveChromatin	CD19_Primary_Cord_BI	1_TssA	6103	142340	0.0428762	3627.58	98.4454	25.1451	1.68239	7.99409e-140	2.10884e-136	Null_Model_OpenChrom	human
Roadmapepigenomics_ActiveChromatin	CD4_Memory_Primary	1_TssA	9100	142340	0.0639314	5980.93	124.065	25.1407	1.5215	8.92968e-140	2.35565e-136	Null_Model_OpenChrom	human
Roadmapepigenomics_ActiveChromatin	Brain_Cingulate_Gyrus	1_TssA	12722	142340	0.0893775	9038.06	146.556	25.1368	1.4076	9.85371e-140	2.59941e-136	Null_Model_OpenChrom	human
Roadmapepigenomics_Histone_narrow	H1_Derived_Neuronal_Progenitor_Cultured_Cells	H3K4me3	16217	142340	0.113931	11875.8	173.145	25.0726	1.36555	4.95343e-139	1.30671e-135	Null_Model_OpenChrom	human
DNaseClusters	HA-sp	Dnase	25265	142340	0.177498	19833.2	216.663	25.0703	1.27387	5.24469e-139	1.38355e-135	Null_Model_OpenChrom	human
Roadmapepigenomics_Histone_narrow	Bone_Marrow_Derived_Mesenchymal_Stem_Cell_Cultured_Cells	H3K9me3	4910	142340	0.0344949	2730.37	86.9757	25.0602	1.79829	6.75728e-139	1.78257e-135	Null_Model_OpenChrom	human
Roadmapepigenomics_Dnase_narrow	HSMMtube_Skeletal_Muscle_Myotubes_Derived_from_HSMM	Dnase	50643	142340	0.355789	43681.2	277.881	25.053	1.15938	8.0897e-139	2.13406e-135	Null_Model_OpenChrom	human
Roadmapepigenomics_ActiveChromatin	Brain_Inferior_Temporal_Lobe	1_TssA	13446	142340	0.094464	9760.89	147.278	25.0214	1.37754	1.78755e-138	4.71555e-135	Null_Model_OpenChrom	human
Roadmapepigenomics_ActiveChromatin	CD4_Naive_Primary	1_TssA	9501	142340	0.0667486	6367.73	125.576	24.9512	1.49205	1.03564e-137	2.73201e-134	Null_Model_OpenChrom	human
Roadmapepigenomics_Histone_narrow	iPS-20b_Cell_Line	H3K9me3	7048	142340	0.0495152	4347.74	108.316	24.9294	1.62107	1.78629e-137	4.71224e-134	Null_Model_OpenChrom	human
Roadmapepigenomics_Histone_narrow	H1_BMP4_Derived_Trophoblast_Cultured_Cells	H3K4me3	16206	142340	0.113854	11999.4	169.336	24.8416	1.35056	1.59477e-136	4.20699e-133	Null_Model_OpenChrom	human
Roadmapepigenomics_Histone_narrow	Right_Atrium	H3K9me3	2511	142340	0.0176409	1171.43	53.9578	24.8263	2.14353	2.3337e-136	6.15629e-133	Null_Model_OpenChrom	human
Roadmapepigenomics_Histone_narrow	NH-A_Astrocytes	H2A.Z	21827	142340	0.153344	16969.8	195.649	24.8261	1.28623	2.34347e-136	6.18208e-133	Null_Model_OpenChrom	human
Roadmapepigenomics_Histone_narrow	CD4_Memory_Primary_Cells	H3K9me3	2360	142340	0.01658	1039.63	53.1863	24.8255	2.27005	2.37994e-136	6.27829e-133	Null_Model_OpenChrom	human
DNaseI_Duke	HSMM	Dnase	35766	142340	0.251272	29545.4	250.763	24.8067	1.21054	3.79604e-136	1.0014e-132	Null_Model_OpenChrom	human
Roadmapepigenomics_Histone_narrow	Pancreas	H3K4me3	16213	142340	0.113903	11982.1	170.56	24.8056	1.3531	3.89637e-136	1.02786e-132	Null_Model_OpenChrom	human
Roadmapepigenomics_ActiveChromatin	Brain_Anterior_Caudate	1_TssA	14630	142340	0.102782	10757	156.309	24.7781	1.36005	7.72838e-136	2.03875e-132	Null_Model_OpenChrom	human
Roadmapepigenomics_ActiveChromatin	CD34	1_TssA	7113	142340	0.0499719	4433	108.189	24.7713	1.60456	9.1304e-136	2.4086e-132	Null_Model_OpenChrom	human
Roadmapepigenomics_ActiveChromatin	CD56_Primary	1_TssA	6937	142340	0.0487354	4385.01	103.144	24.742	1.58198	1.89096e-135	4.98836e-132	Null_Model_OpenChrom	human
Roadmapepigenomics_Histone_narrow	H1_Derived_Mesenchymal_Stem_Cells	H3K9me3	8098	142340	0.0568919	5290.47	113.474	24.7416	1.53068	1.90736e-135	5.0316e-132	Null_Model_OpenChrom	human
Roadmapepigenomics_Histone_narrow	H1_Cell_Line	H3K9me3	7526	142340	0.0528734	4897.92	106.339	24.7143	1.53657	3.75532e-135	9.90653e-132	Null_Model_OpenChrom	human
Roadmapepigenomics_Histone_narrow	CD4+_CD25-_CD45RA+_Naive_Primary_Cellsd_	H3K9me3	3729	142340	0.0261978	1971.27	71.1809	24.6938	1.89167	6.22984e-135	1.64343e-131	Null_Model_OpenChrom	human
DNaseClusters	SKMC	Dnase	28200	142340	0.198117	22833.4	217.468	24.6777	1.23503	9.29187e-135	2.45119e-131	Null_Model_OpenChrom	human
Roadmapepigenomics_Dnase_narrow	Fetal_Muscle_Leg	Dnase	45595	142340	0.320325	38900.4	271.491	24.6585	1.1721	1.49086e-134	3.93288e-131	Null_Model_OpenChrom	human
Roadmapepigenomics_ActiveChromatin	4star	1_TssA	10805	142340	0.0759098	7443.95	136.495	24.6239	1.45151	3.50105e-134	9.23577e-131	Null_Model_OpenChrom	human
Roadmapepigenomics_Histone_narrow	iPS_DF_6.9_Cell_Line	H3K4me3	15097	142340	0.106063	11111.4	161.922	24.6146	1.3587	4.40697e-134	1.16256e-130	Null_Model_OpenChrom	human
Roadmapepigenomics_Dnase_narrow	Penis_Foreskin_Fibroblast_Primary_Cells_skin01	Dnase	49565	142340	0.348216	42715.1	278.321	24.6113	1.16036	4.77694e-134	1.26016e-130	Null_Model_OpenChrom	human
Roadmapepigenomics_Histone_narrow	CD3_Primary_Cells_Peripheral_UWUW	H3K9me3	4433	142340	0.0311437	2450.6	80.5659	24.6059	1.80894	5.464e-134	1.4414e-130	Null_Model_OpenChrom	human
Roadmapepigenomics_Histone_narrow	HepG2_Hepatocellular_Carcinoma	H2A.Z	6350	142340	0.0446115	3923.03	98.666	24.5978	1.61865	6.66883e-134	1.75924e-130	Null_Model_OpenChrom	human
Roadmapepigenomics_Histone_narrow	Fetal_Intestine_Large	H3K9me3	12227	142340	0.0859	8683.38	144.08	24.5948	1.40809	7.18346e-134	1.895e-130	Null_Model_OpenChrom	human
Roadmapepigenomics_ActiveChromatin	CD4+_CD25-_CD45RO+_Memory_Primary	1_TssA	7755	142340	0.0544822	4985.95	112.59	24.5941	1.55537	7.30077e-134	1.92594e-130	Null_Model_OpenChrom	human
Roadmapepigenomics_Histone_narrow	Gastric	H3K4me3	16123	142340	0.113271	11971.2	168.906	24.5804	1.34682	1.02273e-133	2.69796e-130	Null_Model_OpenChrom	human
Roadmapepigenomics_Histone_narrow	Penis_Foreskin_Melanocyte_Primary_Cells_skin03	H3K9me3	9554	142340	0.067121	6502.49	124.549	24.5005	1.46928	7.2944e-133	1.92426e-129	Null_Model_OpenChrom	human
Roadmapepigenomics_ActiveChromatin	Colon_Smooth_Muscle	1_TssA	12169	142340	0.0854925	8714.42	141.251	24.4571	1.39642	2.11271e-132	5.57334e-129	Null_Model_OpenChrom	human
Roadmapepigenomics_Histone_narrow	CD4+_CD25int_CD127+_Tmem_Primary_Cellsls	H3K9me3	2856	142340	0.0200646	1415.78	58.9349	24.4374	2.01726	3.42387e-132	9.03217e-129	Null_Model_OpenChrom	human
Roadmapepigenomics_Histone_narrow	Placenta_Amnion	H3K4me3	13533	142340	0.0950752	9909.65	148.365	24.4219	1.36564	5.00982e-132	1.32159e-128	Null_Model_OpenChrom	human
Roadmapepigenomics_ActiveChromatin	Brain_Angular_Gyrus	1_TssA	13602	142340	0.0955599	9880.31	152.399	24.4208	1.37668	5.14648e-132	1.35764e-128	Null_Model_OpenChrom	human
DNaseClusters	Hepatocytes	Dnase	23550	142340	0.165449	18575.3	203.731	24.4181	1.26781	5.49608e-132	1.44987e-128	Null_Model_OpenChrom	human
Roadmapepigenomics_ActiveChromatin	Fetal_Lung	1_TssA	9460	142340	0.0664606	6554.29	119.079	24.4016	1.44333	8.23085e-132	2.1713e-128	Null_Model_OpenChrom	human
Roadmapepigenomics_ActiveChromatin	CD4+_CD25+_CD127-_Treg_Primary	1_TssA	7286	142340	0.0511873	4690.79	106.395	24.3922	1.55326	1.03415e-131	2.72808e-128	Null_Model_OpenChrom	human
Roadmapepigenomics_Dnase_narrow	Penis_Foreskin_Fibroblast_Primary_Cells_skin02	Dnase	47668	142340	0.334888	41005.4	273.776	24.336	1.16248	4.07316e-131	1.0745e-127	Null_Model_OpenChrom	human
Roadmapepigenomics_Histone_narrow	Ovary	H3K9me3	6217	142340	0.0436771	3906.66	94.9528	24.3315	1.59139	4.55398e-131	1.20134e-127	Null_Model_OpenChrom	human
Roadmapepigenomics_Histone_narrow	Lung	H3K4me3	15449	142340	0.108536	11517	161.691	24.3181	1.34141	6.31011e-131	1.66461e-127	Null_Model_OpenChrom	human
Roadmapepigenomics_Histone_narrow	Neurosphere_Cultured_Cells_Cortex_Derived	H3K9me3	6662	142340	0.0468034	4206.5	100.993	24.3136	1.58374	7.0362e-131	1.85615e-127	Null_Model_OpenChrom	human
Roadmapepigenomics_ActiveChromatin	A549_EtOH_0.02pct_Lung_Carcinoma	1_TssA	12903	142340	0.0906491	9380.43	144.923	24.3064	1.37552	8.39133e-131	2.21363e-127	Null_Model_OpenChrom	human
Roadmapepigenomics_Histone_narrow	ES-WA7_Cell_Line	H3K9ac	5799	142340	0.0407405	3621.17	89.6248	24.2994	1.60141	9.95342e-131	2.62571e-127	Null_Model_OpenChrom	human
Roadmapepigenomics_Histone_narrow	hESC_Derived_CD56+_Mesoderm_Cultured_Cells	H3K9me3	9001	142340	0.0632359	6151.9	117.475	24.2529	1.46313	3.07989e-130	8.12475e-127	Null_Model_OpenChrom	human
Roadmapepigenomics_ActiveChromatin	Brain_Germinal_Matrix	10_TssBiv	5125	142340	0.0360053	3132.82	82.4573	24.1602	1.63591	2.91977e-129	7.70236e-126	Null_Model_OpenChrom	human
Roadmapepigenomics_Histone_narrow	H1_BMP4_Derived_Mesendoderm_Cultured_Cells	H3K4me3	12422	142340	0.0872699	8930.19	144.748	24.1233	1.39101	7.11145e-129	1.876e-125	Null_Model_OpenChrom	human
Roadmapepigenomics_ActiveChromatin	Bone_Marrow_Derived_Mesenchymal_Stem_Cell	1_TssA	11929	142340	0.0838064	8545.17	140.293	24.1198	1.39599	7.74473e-129	2.04306e-125	Null_Model_OpenChrom	human
Roadmapepigenomics_ActiveChromatin	Fetal_Adrenal_Gland	1_TssA	8124	142340	0.0570746	5378.71	114.003	24.0809	1.5104	1.98229e-128	5.22927e-125	Null_Model_OpenChrom	human
Roadmapepigenomics_ActiveChromatin	Adult_Liver	1_TssA	8428	142340	0.0592103	5720.82	112.534	24.0564	1.47321	3.57522e-128	9.43143e-125	Null_Model_OpenChrom	human
Roadmapepigenomics_ActiveChromatin	CD4+_CD25-_IL17-_PMA-Ionomycin_stimulated_MACS_purified_Th_Primary	1_TssA	8465	142340	0.0594703	5638.75	117.494	24.0545	1.50122	3.74845e-128	9.88841e-125	Null_Model_OpenChrom	human
Roadmapepigenomics_Histone_narrow	GM12878_Lymphoblastoid	H2A.Z	18024	142340	0.126626	13786.1	176.246	24.0451	1.3074	4.69751e-128	1.2392e-124	Null_Model_OpenChrom	human
Roadmapepigenomics_Histone_narrow	HUES48_Cell_Line	H3K9me3	7128	142340	0.0500773	4692.71	101.498	23.9935	1.51895	1.62596e-127	4.28928e-124	Null_Model_OpenChrom	human
Roadmapepigenomics_ActiveChromatin	Brain_Dorsolateral_Prefrontal_Cortex	1_TssA	13482	142340	0.0947169	9994.13	145.467	23.977	1.34899	2.41669e-127	6.37523e-124	Null_Model_OpenChrom	human
Roadmapepigenomics_Histone_narrow	HSMM_Skeletal_Muscle_Myoblasts	H2A.Z	20917	142340	0.146951	16380.6	189.265	23.9687	1.27694	2.94925e-127	7.78011e-124	Null_Model_OpenChrom	human
Roadmapepigenomics_ActiveChromatin	Brain_Hippocampus_Middle	1_TssA	12402	142340	0.0871294	8936.82	144.998	23.8981	1.38774	1.60167e-126	4.22521e-123	Null_Model_OpenChrom	human
Roadmapepigenomics_Dnase_narrow	NHDF-Ad_Adult_Dermal_Fibroblasts	Dnase	46101	142340	0.323879	39839.3	262.119	23.8888	1.15717	2.0001e-126	5.27627e-123	Null_Model_OpenChrom	human
Roadmapepigenomics_Histone_narrow	H1_Derived_Mesenchymal_Stem_Cells	H3K4me3	17801	142340	0.12506	13730.1	170.448	23.8834	1.29649	2.27761e-126	6.00833e-123	Null_Model_OpenChrom	human
BroadChromHMM	H1-hESC	ActivePromoter	6201	142340	0.0435647	3918.83	95.7316	23.8393	1.58236	6.53834e-126	1.72481e-122	Null_Model_OpenChrom	human
BroadChromHMM	HUVEC	ActivePromoter	7514	142340	0.0527891	5014.41	105.239	23.7516	1.49848	5.29328e-125	1.39637e-121	Null_Model_OpenChrom	human
Roadmapepigenomics_Histone_narrow	HUVEC_Umbilical_Vein_Endothelial_Cells	H2A.Z	22111	142340	0.155339	17536.6	192.741	23.7332	1.26085	8.19032e-125	2.16061e-121	Null_Model_OpenChrom	human
Roadmapepigenomics_ActiveChromatin	Dnd41_TCell_Leukemia	1_TssA	6076	142340	0.0426865	3870.12	93.0064	23.7175	1.56998	1.18929e-124	3.13735e-121	Null_Model_OpenChrom	human
Roadmapepigenomics_Histone_narrow	Muscle_Satellite_Cultured_Cells	H3K9me3	4792	142340	0.0336659	2909.99	79.6653	23.6239	1.64674	1.09433e-123	2.88684e-120	Null_Model_OpenChrom	human
Roadmapepigenomics_Dnase_narrow	Penis_Foreskin_Keratinocyte_Primary_Cells_skin02	Dnase	40073	142340	0.28153	34451.7	238.59	23.5604	1.16316	4.91105e-123	1.29554e-119	Null_Model_OpenChrom	human
DNaseI_Duke	CD20+_RO01794	Dnase	33524	142340	0.235521	28134.1	228.846	23.5525	1.19158	5.91837e-123	1.56126e-119	Null_Model_OpenChrom	human
DNaseI_Duke	LNCap	Dnase	35405	142340	0.248735	29792.7	238.393	23.5423	1.18838	7.521e-123	1.98404e-119	Null_Model_OpenChrom	human
Roadmapepigenomics_Histone_narrow	H1_Derived_Neuronal_Progenitor_Cultured_Cells	H3K23ac	21640	142340	0.15203	17436.1	179.681	23.3966	1.2411	2.31655e-121	6.11105e-118	Null_Model_OpenChrom	human
Roadmapepigenomics_Histone_narrow	H1_Derived_Mesenchymal_Stem_Cells	H3K9ac	15624	142340	0.109765	12055.2	152.872	23.3448	1.29604	7.78626e-121	2.05402e-117	Null_Model_OpenChrom	human
DNaseI_Duke	GM12891	Dnase	38999	142340	0.273985	33412.4	239.861	23.2908	1.1672	2.74788e-120	7.2489e-117	Null_Model_OpenChrom	human
Roadmapepigenomics_ActiveChromatin	Breast_Myoepithelial	1_TssA	12006	142340	0.0843473	8935.8	131.885	23.2793	1.34358	3.59154e-120	9.47447e-117	Null_Model_OpenChrom	human
Roadmapepigenomics_ActiveChromatin	CD3_Primary_Peripheral_UW	11_BivFlnk	3795	142340	0.0266615	2182.81	69.3223	23.2565	1.73859	6.11138e-120	1.61218e-116	Null_Model_OpenChrom	human
Roadmapepigenomics_Histone_narrow	Pancreatic_Islets	H3K9ac	13405	142340	0.0941759	10068.4	143.909	23.1856	1.3314	3.18406e-119	8.39955e-116	Null_Model_OpenChrom	human
Roadmapepigenomics_Histone_narrow	CD19_Primary_Cells_Peripheral_UW	H3K9me3	4005	142340	0.0281369	2383.73	70.1312	23.1177	1.68014	1.53844e-118	4.0584e-115	Null_Model_OpenChrom	human
Roadmapepigenomics_ActiveChromatin	CD8_Memory_Primary	1_TssA	8879	142340	0.0623788	6211.7	115.528	23.0878	1.4294	3.0704e-118	8.09972e-115	Null_Model_OpenChrom	human
Roadmapepigenomics_Histone_narrow	Esophagus	H3K4me3	16015	142340	0.112512	12407.5	156.286	23.0829	1.29076	3.43538e-118	9.06254e-115	Null_Model_OpenChrom	human
Roadmapepigenomics_ActiveChromatin	Esophagus	1_TssA	10982	142340	0.0771533	7995.78	129.486	23.0621	1.37347	5.55874e-118	1.4664e-114	Null_Model_OpenChrom	human
Roadmapepigenomics_Histone_narrow	H1_BMP4_Derived_Mesendoderm_Cultured_Cells	H4K8ac	10976	142340	0.0771111	8038.88	127.405	23.0533	1.36536	6.80785e-118	1.79591e-114	Null_Model_OpenChrom	human
Roadmapepigenomics_ActiveChromatin	CD4+_CD25int_CD127+_Tmem_Primary	1_TssA	9714	142340	0.068245	6974.72	119.123	22.9954	1.39274	2.59393e-117	6.8428e-114	Null_Model_OpenChrom	human
Roadmapepigenomics_Histone_narrow	K562_Leukemia	H2A.Z	19907	142340	0.139855	16019	170.41	22.8155	1.24271	1.60902e-115	4.24459e-112	Null_Model_OpenChrom	human
Roadmapepigenomics_Histone_narrow	Aorta	H3K27me3	5768	142340	0.0405227	3806.93	86.0937	22.7783	1.51513	3.76419e-115	9.92993e-112	Null_Model_OpenChrom	human
Roadmapepigenomics_ActiveChromatin	ES-WA7	1_TssA	11113	142340	0.0780736	8348	121.528	22.7519	1.33122	6.86475e-115	1.81092e-111	Null_Model_OpenChrom	human
Roadmapepigenomics_Histone_narrow	H1_BMP4_Derived_Trophoblast_Cultured_Cells	H2A.Z	25279	142340	0.177596	21006.6	187.784	22.7515	1.20338	6.93944e-115	1.83062e-111	Null_Model_OpenChrom	human
Roadmapepigenomics_Histone_narrow	Rectal_Smooth_Muscle	H3K9me3	3808	142340	0.0267528	2260.87	68.0587	22.7323	1.68431	1.07389e-114	2.83292e-111	Null_Model_OpenChrom	human
Roadmapepigenomics_ActiveChromatin	CD3_Primary_Peripheral_UW	1_TssA	6480	142340	0.0455248	4376.12	92.706	22.6941	1.48076	2.5635e-114	6.76251e-111	Null_Model_OpenChrom	human
Roadmapepigenomics_Histone_narrow	Ovary	H3K4me3	15847	142340	0.111332	12437.5	150.337	22.6792	1.27413	3.59085e-114	9.47266e-111	Null_Model_OpenChrom	human
Roadmapepigenomics_Histone_narrow	Small_Intestine	H3K9me3	3093	142340	0.0217297	1743.19	59.5887	22.6521	1.77433	6.65067e-114	1.75445e-110	Null_Model_OpenChrom	human
Roadmapepigenomics_Histone_narrow	H1_BMP4_Derived_Trophoblast_Cultured_Cells	H3K4me2	16367	142340	0.114985	12909.5	152.754	22.6348	1.26783	9.85608e-114	2.60003e-110	Null_Model_OpenChrom	human
Roadmapepigenomics_Histone_narrow	Fetal_Adrenal_Gland	H3K4me3	15810	142340	0.111072	12453.6	148.569	22.5913	1.26951	2.64069e-113	6.96614e-110	Null_Model_OpenChrom	human
Roadmapepigenomics_Histone_narrow	Aorta	H3K4me3	12763	142340	0.0896656	9636.84	138.437	22.5818	1.3244	3.27208e-113	8.63175e-110	Null_Model_OpenChrom	human
Roadmapepigenomics_ActiveChromatin	Fetal_Intestine_Small	1_TssA	9643	142340	0.0677462	7022.66	116.264	22.5378	1.37313	8.84103e-113	2.33226e-109	Null_Model_OpenChrom	human
Roadmapepigenomics_Histone_narrow	Left_Ventricle	H3K4me3	14826	142340	0.104159	11437	150.379	22.5366	1.29632	9.09473e-113	2.39919e-109	Null_Model_OpenChrom	human
Roadmapepigenomics_Histone_narrow	Small_Intestine	H3K4me3	12860	142340	0.0903471	9763.73	137.429	22.5299	1.31712	1.05615e-112	2.78612e-109	Null_Model_OpenChrom	human
Roadmapepigenomics_Histone_narrow	H1_BMP4_Derived_Mesendoderm_Cultured_Cells	H3K4me2	13091	142340	0.0919699	10018.9	136.613	22.4873	1.30662	2.76131e-112	7.28435e-109	Null_Model_OpenChrom	human
Roadmapepigenomics_Histone_narrow	Pancreatic_Islets	H3K4me3	14516	142340	0.101981	11259.5	145.022	22.455	1.28922	5.72302e-112	1.50973e-108	Null_Model_OpenChrom	human
Roadmapepigenomics_Histone_narrow	Brain_Angular_Gyrus	H3K4me3	19916	142340	0.139919	16052.8	172.497	22.3955	1.24065	2.17471e-111	5.73689e-108	Null_Model_OpenChrom	human
Roadmapepigenomics_Histone_narrow	4star	H3K4me3	16212	142340	0.113896	12811.5	152.011	22.3703	1.26543	3.83421e-111	1.01146e-107	Null_Model_OpenChrom	human
Roadmapepigenomics_ActiveChromatin	Fetal_Brain_Female	1_TssA	11125	142340	0.0781579	8265.87	128.119	22.3163	1.3459	1.28319e-110	3.38506e-107	Null_Model_OpenChrom	human
Roadmapepigenomics_ActiveChromatin	CD3_Primary_Peripheral_UW	12_EnhBiv	7726	142340	0.0542785	5393.1	104.722	22.2771	1.43257	3.07844e-110	8.12091e-107	Null_Model_OpenChrom	human
Roadmapepigenomics_Histone_narrow	iPS_DF_19.11_Cell_Line	H3K4me3	17893	142340	0.125706	14372.3	158.275	22.244	1.24496	6.44915e-110	1.70128e-106	Null_Model_OpenChrom	human
Roadmapepigenomics_Histone_narrow	IMR90_Cell_Line	H3K4me3	16511	142340	0.115997	13178.2	149.954	22.2252	1.2529	9.80075e-110	2.58544e-106	Null_Model_OpenChrom	human
Roadmapepigenomics_Histone_narrow	Fetal_Adrenal_Gland	H3K9me3	8719	142340	0.0612547	6169.57	114.856	22.1968	1.41323	1.84374e-109	4.86378e-106	Null_Model_OpenChrom	human
Roadmapepigenomics_Histone_narrow	Brain_Substantia_Nigra	H3K4me3	19948	142340	0.140143	16067.3	174.832	22.1965	1.24152	1.85591e-109	4.89589e-106	Null_Model_OpenChrom	human
DNaseI_Duke	Frontal_cortex_OC	Dnase	33558	142340	0.235759	28864.4	211.691	22.1719	1.16261	3.20782e-109	8.46222e-106	Null_Model_OpenChrom	human
Roadmapepigenomics_ActiveChromatin	Adipose_Derived_Mesenchymal_Stem_Cell	1_TssA	13001	142340	0.0913376	9941.25	138.404	22.1074	1.30778	1.34045e-108	3.5361e-105	Null_Model_OpenChrom	human
Roadmapepigenomics_Histone_narrow	Penis_Foreskin_Melanocyte_Primary_Cells_skin03	H3K4me3	16929	142340	0.118934	13463.8	157.377	22.0187	1.25738	9.54103e-108	2.51692e-104	Null_Model_OpenChrom	human
BroadChromHMM	HMEC	WeakPromoter	6725	142340	0.047246	4634.28	95.0264	22.0014	1.45114	1.39514e-107	3.68038e-104	Null_Model_OpenChrom	human
Roadmapepigenomics_Histone_narrow	Brain_Mid_Frontal_Lobe	H3K9ac	21216	142340	0.149052	17464.4	170.58	21.993	1.21481	1.6812e-107	4.435e-104	Null_Model_OpenChrom	human
Roadmapepigenomics_ActiveChromatin	Duodenum_Mucosa	1_TssA	11353	142340	0.0797597	8526	128.672	21.9706	1.33157	2.74885e-107	7.25148e-104	Null_Model_OpenChrom	human
Roadmapepigenomics_Histone_narrow	H1_BMP4_Derived_Trophoblast_Cultured_Cells	H3K9ac	8140	142340	0.057187	5858.14	103.928	21.9562	1.38952	3.77754e-107	9.96516e-104	Null_Model_OpenChrom	human
Roadmapepigenomics_ActiveChromatin	Aorta	1_TssA	12899	142340	0.090621	9956.77	134.03	21.952	1.2955	4.14002e-107	1.09214e-103	Null_Model_OpenChrom	human
Roadmapepigenomics_Histone_narrow	Brain_Inferior_Temporal_Lobe	H3K4me3	21836	142340	0.153407	18018.9	174.256	21.905	1.21184	1.16333e-106	3.06887e-103	Null_Model_OpenChrom	human
Roadmapepigenomics_Histone_narrow	Brain_Cingulate_Gyrus	H3K4me3	21178	142340	0.148785	17476.6	169.625	21.8214	1.2118	7.26654e-106	1.91691e-102	Null_Model_OpenChrom	human
Roadmapepigenomics_Histone_narrow	H9_Cell_Line	H3K23me2	17008	142340	0.119489	13658.2	153.558	21.8146	1.24526	8.44095e-106	2.22672e-102	Null_Model_OpenChrom	human
Roadmapepigenomics_Histone_narrow	Fetal_Muscle_Trunk	H3K4me3	14595	142340	0.102536	11446.7	144.779	21.7453	1.27504	3.8276e-105	1.00972e-101	Null_Model_OpenChrom	human
Roadmapepigenomics_Histone_narrow	Fetal_Placenta	H3K4me3	13178	142340	0.0925811	10326.9	131.212	21.7289	1.27608	5.46767e-105	1.44237e-101	Null_Model_OpenChrom	human
Roadmapepigenomics_Histone_narrow	H9_Cell_Line	H3K4me3	17564	142340	0.123395	14151.3	157.318	21.6928	1.24116	1.20055e-104	3.16706e-101	Null_Model_OpenChrom	human
Roadmapepigenomics_Histone_narrow	Psoas_Muscle	H3K4me3	15597	142340	0.109576	12421.7	146.638	21.6539	1.25562	2.79193e-104	7.3651e-101	Null_Model_OpenChrom	human
Roadmapepigenomics_Histone_narrow	Fetal_Kidney	H3K4me3	13606	142340	0.095588	10738.5	132.526	21.6375	1.26704	3.98305e-104	1.05073e-100	Null_Model_OpenChrom	human
Roadmapepigenomics_Histone_narrow	CD8_Memory_Primary_Cells	H3K9me3	1801	142340	0.0126528	932.327	40.2803	21.5657	1.93173	1.88473e-103	4.97192e-100	Null_Model_OpenChrom	human
Roadmapepigenomics_Histone_narrow	Penis_Foreskin_Melanocyte_Primary_Cells_skin01	H3K4me3	17070	142340	0.119924	13840.2	149.803	21.5601	1.23336	2.12632e-103	5.60923e-100	Null_Model_OpenChrom	human
Roadmapepigenomics_Histone_narrow	Neurosphere_Cultured_Cells_Ganglionic_Eminence_Derived	H3K9me3	4393	142340	0.0308627	2833.77	72.4344	21.5261	1.55023	4.43076e-103	1.16884e-99	Null_Model_OpenChrom	human
Roadmapepigenomics_Histone_narrow	Fetal_Muscle_Leg	H3K4me3	15371	142340	0.107988	12324.4	141.588	21.517	1.2472	5.396e-103	1.42347e-99	Null_Model_OpenChrom	human
Roadmapepigenomics_Histone_narrow	Brain_Cingulate_Gyrus	H3K9ac	24321	142340	0.170866	20579	174.406	21.4556	1.18183	2.02303e-102	5.33676e-99	Null_Model_OpenChrom	human
Roadmapepigenomics_ActiveChromatin	Fetal_Intestine_Large	1_TssA	9663	142340	0.0678868	7269.48	111.737	21.421	1.32926	4.25685e-102	1.12296e-98	Null_Model_OpenChrom	human
Roadmapepigenomics_ActiveChromatin	Fetal_Adrenal_Gland	11_BivFlnk	4658	142340	0.0327245	3101.74	72.7332	21.3968	1.50174	7.15908e-102	1.88857e-98	Null_Model_OpenChrom	human
Roadmapepigenomics_ActiveChromatin	Breast_vHMEC	1_TssA	9258	142340	0.0650415	6914.72	109.866	21.3286	1.33888	3.08096e-101	8.12756e-98	Null_Model_OpenChrom	human
Roadmapepigenomics_Histone_narrow	NH-A_Astrocytes	H3K9me3	6327	142340	0.0444499	4469.92	87.0939	21.3227	1.41546	3.49384e-101	9.21676e-98	Null_Model_OpenChrom	human
Roadmapepigenomics_Histone_narrow	Brain_Angular_Gyrus	H3K9ac	23986	142340	0.168512	20193.4	178.048	21.3008	1.18781	5.58488e-101	1.47329e-97	Null_Model_OpenChrom	human
BroadChromHMM	K562	WeakPromoter	5707	142340	0.0400941	3895.57	85.1013	21.2856	1.465	7.71504e-101	2.03523e-97	Null_Model_OpenChrom	human
Roadmapepigenomics_ActiveChromatin	Brain_Germinal_Matrix	1_TssA	8737	142340	0.0613812	6505.4	104.912	21.2713	1.34304	1.0473e-100	2.76277e-97	Null_Model_OpenChrom	human
Roadmapepigenomics_Histone_narrow	Stomach_Smooth_Muscle	H3K9me3	2109	142340	0.0148166	1166.52	44.4481	21.2041	1.80795	4.37337e-100	1.1537e-96	Null_Model_OpenChrom	human
Roadmapepigenomics_Histone_narrow	hESC_Derived_CD56+_Ectoderm_Cultured_Cells	H3K9me3	4399	142340	0.0309049	2880.24	71.7419	21.1698	1.5273	9.07468e-100	2.3939e-96	Null_Model_OpenChrom	human
Roadmapepigenomics_Histone_narrow	H1_BMP4_Derived_Trophoblast_Cultured_Cells	H3K9me3	13004	142340	0.0913587	10196	132.664	21.1664	1.2754	9.74519e-100	2.57078e-96	Null_Model_OpenChrom	human
Misc_ChIP	LoVo	H3K4me3	9489	142340	0.0666643	7182.19	109.017	21.1601	1.32119	1.11308e-99	2.93632e-96	Null_Model_OpenChrom	human
Roadmapepigenomics_Histone_narrow	iPS-18_Cell_Line	H3K9me3	5618	142340	0.0394689	3894.22	81.6017	21.1243	1.44265	2.37643e-99	6.26902e-96	Null_Model_OpenChrom	human
Roadmapepigenomics_Histone_narrow	Brain_Substantia_Nigra	H3K9ac	21405	142340	0.150379	17869	167.651	21.0916	1.19789	4.75459e-99	1.25426e-95	Null_Model_OpenChrom	human
Roadmapepigenomics_Histone_narrow	H1_Derived_Neuronal_Progenitor_Cultured_Cells	H3K4me2	20017	142340	0.140628	16579.3	163.059	21.0825	1.20735	5.76128e-99	1.51982e-95	Null_Model_OpenChrom	human
Roadmapepigenomics_Histone_narrow	Neurosphere_Cultured_Cells_Cortex_Derived	H3K4me3	16492	142340	0.115863	13452.8	144.566	21.0228	1.22591	2.02678e-98	5.34664e-95	Null_Model_OpenChrom	human
Roadmapepigenomics_Histone_narrow	iPS-15b_Cell_Line	H3K9me3	4833	142340	0.0339539	3266.14	74.6256	20.9963	1.47973	3.54678e-98	9.3564e-95	Null_Model_OpenChrom	human
Roadmapepigenomics_Histone_narrow	Brain_Mid_Frontal_Lobe	H3K4me3	20788	142340	0.146045	17332.6	164.595	20.9932	1.19936	3.78646e-98	9.98869e-95	Null_Model_OpenChrom	human
Roadmapepigenomics_Histone_narrow	Brain_Inferior_Temporal_Lobe	H3K9ac	26571	142340	0.186673	22805.1	180.469	20.8672	1.16513	5.32384e-97	1.40443e-93	Null_Model_OpenChrom	human
Roadmapepigenomics_Histone_narrow	Brain_Anterior_Caudate	H3K4me3	22791	142340	0.160117	19343.5	165.265	20.8604	1.17822	6.1341e-97	1.61818e-93	Null_Model_OpenChrom	human
Roadmapepigenomics_Histone_narrow	Sigmoid_Colon	H3K4me3	13017	142340	0.09145	10246.8	133.001	20.8281	1.27034	1.20503e-96	3.17887e-93	Null_Model_OpenChrom	human
Roadmapepigenomics_ActiveChromatin	CD4+_CD25+_CD127-_Treg_Primary	11_BivFlnk	3066	142340	0.02154	1890.27	56.6062	20.7703	1.62199	4.01812e-96	1.05998e-92	Null_Model_OpenChrom	human
Roadmapepigenomics_Histone_narrow	Peripheral_Blood_Mononuclear_Primary_Cells	H3K4me3	14502	142340	0.101883	11643.9	138.026	20.7071	1.24546	1.49416e-95	3.94159e-92	Null_Model_OpenChrom	human
Roadmapepigenomics_Histone_narrow	H1_BMP4_Derived_Mesendoderm_Cultured_Cells	H3K9ac	16928	142340	0.118927	13788.9	151.811	20.6778	1.22766	2.74433e-95	7.23954e-92	Null_Model_OpenChrom	human
Roadmapepigenomics_Histone_narrow	Thymus	H3K4me3	14606	142340	0.102613	11775.8	137.097	20.6436	1.24034	5.5719e-95	1.46987e-91	Null_Model_OpenChrom	human
Roadmapepigenomics_Histone_narrow	ES-I3_Cell_Line	H3K9me3	4705	142340	0.0330547	3183	74.2675	20.4934	1.47816	1.23266e-93	3.25175e-90	Null_Model_OpenChrom	human
Roadmapepigenomics_Histone_narrow	NHEK-Epidermal_Keratinocytes	H2A.Z	20216	142340	0.142026	17124.9	151.191	20.445	1.1805	3.33124e-93	8.7878e-90	Null_Model_OpenChrom	human
Roadmapepigenomics_Histone_narrow	NHEK-Epidermal_Keratinocytes	H3K9me3	5735	142340	0.0402909	4050.56	82.5118	20.4146	1.41585	6.20683e-93	1.63736e-89	Null_Model_OpenChrom	human
Roadmapepigenomics_ActiveChromatin	Colonic_Mucosa	1_TssA	10360	142340	0.0727835	8061.74	112.744	20.3848	1.28508	1.14164e-92	3.01164e-89	Null_Model_OpenChrom	human
Roadmapepigenomics_Histone_narrow	H9_Cell_Line	H3K4me2	20749	142340	0.145771	17453.3	161.88	20.3589	1.18883	1.93773e-92	5.11172e-89	Null_Model_OpenChrom	human
Roadmapepigenomics_Histone_narrow	Osteoblasts	H2A.Z	23191	142340	0.162927	19787.9	167.675	20.296	1.17198	6.97273e-92	1.83941e-88	Null_Model_OpenChrom	human
BroadChromHMM	NHLF	ActivePromoter	8779	142340	0.0616763	6609.55	106.896	20.2949	1.32823	7.12761e-92	1.88026e-88	Null_Model_OpenChrom	human
Roadmapepigenomics_ActiveChromatin	CD4+_CD25+_CD127-_Treg_Primary	10_TssBiv	1382	142340	0.00970915	693.837	33.9275	20.2834	1.99182	9.01906e-92	2.37923e-88	Null_Model_OpenChrom	human
Roadmapepigenomics_ActiveChromatin	Colonic_Mucosa	11_BivFlnk	2824	142340	0.0198398	1741.42	53.4037	20.2716	1.62166	1.14613e-91	3.0235e-88	Null_Model_OpenChrom	human
Roadmapepigenomics_Histone_narrow	HMEC_Mammary_Epithelial	H2A.Z	25147	142340	0.176669	21696	171.098	20.1698	1.15906	9.01846e-91	2.37907e-87	Null_Model_OpenChrom	human
Roadmapepigenomics_Histone_narrow	H1_Cell_Line	H3K4me3	16705	142340	0.11736	13771.5	145.537	20.1562	1.21301	1.18713e-90	3.13166e-87	Null_Model_OpenChrom	human
Roadmapepigenomics_ActiveChromatin	Duodenum_Smooth_Muscle	1_TssA	11780	142340	0.0827596	9361.59	120.079	20.1402	1.25833	1.6386e-90	4.32263e-87	Null_Model_OpenChrom	human
Roadmapepigenomics_Histone_narrow	CD4_Naive_Primary_Cells	H3K9ac	12671	142340	0.0890192	10238.6	120.988	20.1043	1.23757	3.38478e-90	8.92904e-87	Null_Model_OpenChrom	human
Roadmapepigenomics_Histone_narrow	H1_BMP4_Derived_Trophoblast_Cultured_Cells	H4K12ac	19432	142340	0.136518	16327.5	154.62	20.0783	1.19014	5.71312e-90	1.50712e-86	Null_Model_OpenChrom	human
Roadmapepigenomics_Histone_narrow	Right_Ventricle	H3K4me3	17445	142340	0.122559	14527.3	145.597	20.0394	1.20084	1.24933e-89	3.29574e-86	Null_Model_OpenChrom	human
BroadChromHMM	HSMM	ActivePromoter	7919	142340	0.0556344	5902.12	100.731	20.0225	1.34172	1.75475e-89	4.62902e-86	Null_Model_OpenChrom	human
BroadChromHMM	K562	ActivePromoter	7739	142340	0.0543698	5766.33	98.7253	19.9814	1.3421	3.99787e-89	1.05464e-85	Null_Model_OpenChrom	human
Roadmapepigenomics_Histone_narrow	H1_Derived_Neuronal_Progenitor_Cultured_Cells	H3K9me3	6332	142340	0.044485	4599.08	86.7333	19.9798	1.3768	4.12505e-89	1.08819e-85	Null_Model_OpenChrom	human
Roadmapepigenomics_Histone_narrow	CD34_Cultured_Cells	H3K9me3	7787	142340	0.054707	5912.31	93.891	19.9667	1.31708	5.37023e-89	1.41667e-85	Null_Model_OpenChrom	human
Roadmapepigenomics_Histone_narrow	Right_Atrium	H3K4me3	16584	142340	0.11651	13644.4	147.432	19.9387	1.21544	9.40052e-89	2.47986e-85	Null_Model_OpenChrom	human
DNaseClusters	NHLF	Dnase	26765	142340	0.188036	23098.2	184.128	19.9147	1.15875	1.51873e-88	4.0064e-85	Null_Model_OpenChrom	human
Roadmapepigenomics_Histone_narrow	Fetal_Stomach	H3K4me3	15944	142340	0.112013	13102.1	142.749	19.9085	1.21691	1.71618e-88	4.52727e-85	Null_Model_OpenChrom	human
Roadmapepigenomics_Histone_narrow	Brain_Anterior_Caudate	H3K9ac	25819	142340	0.18139	22308	176.49	19.8932	1.15738	2.33125e-88	6.14983e-85	Null_Model_OpenChrom	human
Roadmapepigenomics_ActiveChromatin	CD15_Primary	11_BivFlnk	2475	142340	0.0173879	1501.3	49.0205	19.863	1.64857	4.25014e-88	1.12119e-84	Null_Model_OpenChrom	human
BroadChromHMM	NHEK	ActivePromoter	8427	142340	0.0592033	6402.38	102.007	19.848	1.31623	5.73728e-88	1.51349e-84	Null_Model_OpenChrom	human
DNaseI_Duke	Osteobl	Dnase	32203	142340	0.22624	28336	195.096	19.8209	1.13647	9.82928e-88	2.59296e-84	Null_Model_OpenChrom	human
Roadmapepigenomics_Histone_narrow	NHLF_Lung_Fibroblasts	H3K4me3	14046	142340	0.0986792	11527.4	128.206	19.6446	1.21848	3.21271e-86	8.47512e-83	Null_Model_OpenChrom	human
BroadChromHMM	HepG2	WeakPromoter	10474	142340	0.0735844	8215.73	114.976	19.6412	1.27487	3.43709e-86	9.06704e-83	Null_Model_OpenChrom	human
Roadmapepigenomics_Histone_narrow	A549_EtOH_0.02pct_Lung_Carcinoma	H3K9me3	3667	142340	0.0257623	2481.35	60.5027	19.5966	1.47782	8.26942e-86	2.18147e-82	Null_Model_OpenChrom	human
Roadmapepigenomics_ActiveChromatin	Fetal_Muscle_Leg	1_TssA	4220	142340	0.0296473	2900.93	67.5667	19.5226	1.45471	3.53031e-85	9.31295e-82	Null_Model_OpenChrom	human
Roadmapepigenomics_Histone_narrow	CD14_Primary_Cells	H3K4me3	12440	142340	0.0873964	10055	122.765	19.4273	1.23719	2.26787e-84	5.98263e-81	Null_Model_OpenChrom	human
Roadmapepigenomics_Histone_narrow	Adult_Liver	H3K4me3	16729	142340	0.117528	14078.8	136.429	19.4254	1.18824	2.35523e-84	6.21311e-81	Null_Model_OpenChrom	human
Roadmapepigenomics_Histone_narrow	HMEC_Mammary_Epithelial	H3K9me3	9411	142340	0.0661163	7364.23	105.506	19.3994	1.27793	3.90028e-84	1.02889e-80	Null_Model_OpenChrom	human
Roadmapepigenomics_Histone_narrow	Spleen	H3K4me3	20724	142340	0.145595	17647.1	158.724	19.3852	1.17436	5.14858e-84	1.3582e-80	Null_Model_OpenChrom	human
Roadmapepigenomics_Histone_narrow	CD19_Primary_Cells_Peripheral_UW	H3K4me3	13060	142340	0.0917521	10632.5	125.225	19.3852	1.22831	5.14969e-84	1.35849e-80	Null_Model_OpenChrom	human
Misc_Histone	NeutrophilCells	H3K4me3	15438	142340	0.108459	12889.1	131.609	19.3675	1.19776	7.25923e-84	1.91498e-80	Null_Model_OpenChrom	human
Roadmapepigenomics_Histone_narrow	HSMMtube_Skeletal_Muscle_Myotubes_Derived_from_HSMM	H3K9me3	4715	142340	0.0331249	3306.56	72.9986	19.2941	1.42596	3.00878e-83	7.93715e-80	Null_Model_OpenChrom	human
Roadmapepigenomics_ActiveChromatin	CD15_Primary	10_TssBiv	890	142340	0.00625263	415.062	24.6656	19.2551	2.14426	6.39579e-83	1.68721e-79	Null_Model_OpenChrom	human
Roadmapepigenomics_Histone_narrow	Rectal_Smooth_Muscle	H3K9ac	14418	142340	0.101293	11887	131.643	19.2263	1.21292	1.11498e-82	2.94132e-79	Null_Model_OpenChrom	human
Roadmapepigenomics_Histone_narrow	Fetal_Intestine_Small	H3K4me3	16213	142340	0.113903	13587.3	136.845	19.1871	1.19324	2.37175e-82	6.25668e-79	Null_Model_OpenChrom	human
Roadmapepigenomics_Histone_narrow	CD34_Primary_Cells	H3K4me3	15196	142340	0.106758	12595.3	136.016	19.1207	1.20648	8.48462e-82	2.23824e-78	Null_Model_OpenChrom	human
Roadmapepigenomics_Histone_narrow	Fetal_Kidney	H3K9ac	11838	142340	0.0831671	9642.45	114.988	19.0937	1.2277	1.42474e-81	3.75845e-78	Null_Model_OpenChrom	human
Roadmapepigenomics_Histone_narrow	H1_Derived_Mesenchymal_Stem_Cells	H3K4me2	20278	142340	0.142462	17260.1	158.06	19.0934	1.17485	1.43336e-81	3.78121e-78	Null_Model_OpenChrom	human
BroadChromHMM	HSMM	WeakPromoter	7584	142340	0.0532809	5769.24	95.1426	19.0741	1.31456	2.07277e-81	5.46797e-78	Null_Model_OpenChrom	human
Roadmapepigenomics_Histone_narrow	HMEC_Mammary_Epithelial	H3K4me3	15250	142340	0.107138	12661.7	135.808	19.0588	1.20442	2.77744e-81	7.32689e-78	Null_Model_OpenChrom	human
Roadmapepigenomics_Histone_narrow	Fetal_Intestine_Large	H3K4me3	15734	142340	0.110538	13060.6	140.331	19.051	1.2047	3.22325e-81	8.50294e-78	Null_Model_OpenChrom	human
Roadmapepigenomics_Histone_narrow	CD56_Primary_Cells	H3K4me3	12690	142340	0.0891527	10335.2	123.723	19.0327	1.22784	4.57099e-81	1.20583e-77	Null_Model_OpenChrom	human
Roadmapepigenomics_ActiveChromatin	CD19_Primary_Peripheral_UW	11_BivFlnk	1916	142340	0.0134607	1122.74	41.7532	18.9988	1.70654	8.73072e-81	2.30317e-77	Null_Model_OpenChrom	human
Roadmapepigenomics_ActiveChromatin	ES-I3	1_TssA	10924	142340	0.0767458	8840.15	110.346	18.8847	1.23573	7.61552e-80	2.00897e-76	Null_Model_OpenChrom	human
Roadmapepigenomics_ActiveChromatin	CD4+_CD25-_IL17-_PMA-Ionomycin_stimulated_MACS_purified_Th_Primary	10_TssBiv	772	142340	0.00542363	345.863	22.5658	18.8842	2.2321	7.69645e-80	2.03032e-76	Null_Model_OpenChrom	human
Roadmapepigenomics_ActiveChromatin	A549_EtOH_0.02pct_Lung_Carcinoma	10_TssBiv	1709	142340	0.0120065	983.781	38.5305	18.8219	1.73717	2.49601e-79	6.58447e-76	Null_Model_OpenChrom	human
Roadmapepigenomics_ActiveChromatin	CD4+_CD25-_CD45RA+_Naive_Primary	10_TssBiv	839	142340	0.00589434	385.187	24.1772	18.7703	2.17816	6.60556e-79	1.74255e-75	Null_Model_OpenChrom	human
Roadmapepigenomics_ActiveChromatin	Bone_Marrow_Derived_Mesenchymal_Stem_Cell	10_TssBiv	1546	142340	0.0108613	857.131	36.8497	18.694	1.80369	2.77003e-78	7.30733e-75	Null_Model_OpenChrom	human
Roadmapepigenomics_ActiveChromatin	CD14_Primary	11_BivFlnk	2265	142340	0.0159126	1389.1	46.8787	18.6843	1.63055	3.32081e-78	8.7603e-75	Null_Model_OpenChrom	human
Roadmapepigenomics_Histone_narrow	Brain_Germinal_Matrix	H3K4me3	16908	142340	0.118786	14283.2	141.098	18.6031	1.18377	1.51746e-77	4.00305e-74	Null_Model_OpenChrom	human
Roadmapepigenomics_Dnase_narrow	HSMM_Skeletal_Muscle_Myoblasts	Dnase	41692	142340	0.292904	37709.7	214.234	18.5886	1.1056	1.9863e-77	5.23986e-74	Null_Model_OpenChrom	human
Roadmapepigenomics_Histone_narrow	NHLF_Lung_Fibroblasts	H3K9ac	13371	142340	0.0939371	11072.4	123.719	18.579	1.20759	2.37852e-77	6.27453e-74	Null_Model_OpenChrom	human
Roadmapepigenomics_Histone_narrow	4star	H3K9me3	7049	142340	0.0495223	5362.73	90.7687	18.5777	1.31444	2.43607e-77	6.42635e-74	Null_Model_OpenChrom	human
BroadChromHMM	NHEK	WeakPromoter	5468	142340	0.0384151	3990.99	79.5866	18.5586	1.37009	3.47475e-77	9.16638e-74	Null_Model_OpenChrom	human
Roadmapepigenomics_ActiveChromatin	CD4+_CD25-_CD45RA+_Naive_Primary	3_TxFlnk	3226	142340	0.022664	2150.13	57.9987	18.5499	1.50037	4.08867e-77	1.07859e-73	Null_Model_OpenChrom	human
BroadChromHMM	HSMM	PoisedPromoter	2425	142340	0.0170367	1569.96	46.1658	18.5212	1.54463	6.9689e-77	1.8384e-73	Null_Model_OpenChrom	human
Roadmapepigenomics_Histone_narrow	Stomach_Mucosa	H3K4me3	14088	142340	0.0989743	11721.3	127.893	18.5058	1.20192	9.27797e-77	2.44753e-73	Null_Model_OpenChrom	human
Roadmapepigenomics_ActiveChromatin	CD3_Primary_Cord_BI	10_TssBiv	2303	142340	0.0161796	1426.71	47.36	18.5028	1.61421	9.79738e-77	2.58455e-73	Null_Model_OpenChrom	human
Roadmapepigenomics_Histone_narrow	ES-I3_Cell_Line	H3K9ac	20194	142340	0.141872	17422.7	150.509	18.4127	1.15906	5.19369e-76	1.3701e-72	Null_Model_OpenChrom	human
Roadmapepigenomics_Dnase_narrow	Psoas_Muscle	Dnase	39424	142340	0.276971	35689.3	203.064	18.3919	1.10465	7.62661e-76	2.0119e-72	Null_Model_OpenChrom	human
Roadmapepigenomics_ActiveChromatin	CD34	11_BivFlnk	2297	142340	0.0161374	1422.36	47.5955	18.3765	1.61492	1.01297e-75	2.67222e-72	Null_Model_OpenChrom	human
Roadmapepigenomics_ActiveChromatin	Fetal_Intestine_Large	10_TssBiv	2762	142340	0.0194042	1848.28	49.8195	18.3406	1.49436	1.96206e-75	5.1759e-72	Null_Model_OpenChrom	human
Roadmapepigenomics_ActiveChromatin	Fetal_Heart	1_TssA	6258	142340	0.0439652	4704.46	84.7209	18.3372	1.33023	2.08985e-75	5.51302e-72	Null_Model_OpenChrom	human
Roadmapepigenomics_Histone_narrow	CD34_Primary_Cells	H3K9me3	2850	142340	0.0200225	1876.27	53.3129	18.2645	1.51897	7.93854e-75	2.09419e-71	Null_Model_OpenChrom	human
Roadmapepigenomics_Histone_narrow	hESC_Derived_CD56+_Ectoderm_Cultured_Cells	H3K4me3	16369	142340	0.114999	13945	133.069	18.2161	1.17383	1.9246e-74	5.0771e-71	Null_Model_OpenChrom	human
Roadmapepigenomics_ActiveChromatin	Chondrocytes_from_Bone_Marrow_Derived_Mesenchymal_Stem_Cell	10_TssBiv	1434	142340	0.0100745	807.238	34.5118	18.1608	1.77643	5.27513e-74	1.39158e-70	Null_Model_OpenChrom	human
Roadmapepigenomics_ActiveChromatin	Adipose_Derived_Mesenchymal_Stem_Cell	10_TssBiv	2173	142340	0.0152663	1360.59	44.799	18.1345	1.5971	8.51056e-74	2.24509e-70	Null_Model_OpenChrom	human
DNaseClusters	NH-A	Dnase	24653	142340	0.173198	21669.4	164.649	18.121	1.13769	1.08856e-73	2.87162e-70	Null_Model_OpenChrom	human
Roadmapepigenomics_Histone_narrow	CD4_Naive_Primary_Cells	H3K9me3	1429	142340	0.0100393	787.24	35.4274	18.1148	1.8152	1.21744e-73	3.21162e-70	Null_Model_OpenChrom	human
Roadmapepigenomics_ActiveChromatin	CD4+_CD25-_IL17-_PMA-Ionomycin_stimulated_MACS_purified_Th_Primary	11_BivFlnk	2248	142340	0.0157932	1434.24	45.0153	18.0773	1.56738	2.40447e-73	6.34298e-70	Null_Model_OpenChrom	human
Roadmapepigenomics_Histone_narrow	CD8_Naive_Primary_Cells	H3K9ac	11432	142340	0.0803147	9358.77	114.93	18.039	1.22153	4.81264e-73	1.26958e-69	Null_Model_OpenChrom	human
Roadmapepigenomics_Histone_narrow	H9_Cell_Line	H4K5ac	9078	142340	0.0637769	7281.92	99.7938	17.9979	1.24665	1.01162e-72	2.66867e-69	Null_Model_OpenChrom	human
Roadmapepigenomics_Histone_narrow	Monocytes-CD14+_RO01746	H2A.Z	23413	142340	0.164486	20464.6	164.056	17.9719	1.14407	1.61741e-72	4.26671e-69	Null_Model_OpenChrom	human
Roadmapepigenomics_Histone_narrow	Breast_vHMEC	H3K4me3	12893	142340	0.0905789	10723.7	120.723	17.9689	1.20229	1.70572e-72	4.4997e-69	Null_Model_OpenChrom	human
Roadmapepigenomics_Histone_narrow	CD8_Naive_Primary_Cells	H3K4me3	13661	142340	0.0959744	11356.1	128.839	17.8894	1.20296	7.12885e-72	1.88059e-68	Null_Model_OpenChrom	human
Roadmapepigenomics_ActiveChromatin	Brain_Germinal_Matrix	11_BivFlnk	3509	142340	0.0246522	2423.3	60.9383	17.8163	1.44802	2.63953e-71	6.96308e-68	Null_Model_OpenChrom	human
Roadmapepigenomics_Histone_narrow	H9_Cell_Line	H3K18ac	16922	142340	0.118884	14475.3	137.498	17.7946	1.16903	3.89155e-71	1.02659e-67	Null_Model_OpenChrom	human
Roadmapepigenomics_ActiveChromatin	Fetal_Brain_Female	10_TssBiv	3706	142340	0.0260363	2575.09	63.7157	17.7493	1.43917	8.72178e-71	2.3008e-67	Null_Model_OpenChrom	human
Roadmapepigenomics_Histone_narrow	HSMM_Skeletal_Muscle_Myoblasts	H3K4me3	16434	142340	0.115456	13980.4	138.394	17.7293	1.1755	1.24625e-70	3.2876e-67	Null_Model_OpenChrom	human
Roadmapepigenomics_ActiveChromatin	CD56_Primary	11_BivFlnk	1649	142340	0.0115849	962.827	38.8066	17.6818	1.71266	2.89371e-70	7.63361e-67	Null_Model_OpenChrom	human
Roadmapepigenomics_Histone_narrow	Fetal_Lung	H3K4me3	15974	142340	0.112224	13535.5	138.083	17.6595	1.18015	4.29959e-70	1.13423e-66	Null_Model_OpenChrom	human
Roadmapepigenomics_Histone_narrow	hESC_Derived_CD56+_Mesoderm_Cultured_Cells	H3K4me3	15115	142340	0.106189	12908.3	125.592	17.5704	1.17095	2.07765e-69	5.48085e-66	Null_Model_OpenChrom	human
Roadmapepigenomics_Histone_narrow	Fetal_Brain_Female	H3K4me3	17491	142340	0.122882	15127.5	134.679	17.5494	1.15624	3.00634e-69	7.93072e-66	Null_Model_OpenChrom	human
Roadmapepigenomics_ActiveChromatin	CD3_Primary_Peripheral_UW	10_TssBiv	743	142340	0.0052199	343.557	22.8535	17.4784	2.16267	1.04603e-68	2.75942e-65	Null_Model_OpenChrom	human
Roadmapepigenomics_Histone_narrow	CD3_Primary_Cells_Cord_BI	H3K4me3	13446	142340	0.094464	11403.6	117.079	17.4449	1.1791	1.88324e-68	4.96798e-65	Null_Model_OpenChrom	human
BroadChromHMM	HUVEC	PoisedPromoter	2979	142340	0.0209288	2015.23	55.2744	17.4361	1.47824	2.19677e-68	5.79509e-65	Null_Model_OpenChrom	human
BroadChromHMM	H1-hESC	WeakPromoter	8233	142340	0.0578404	6600.37	94.0503	17.3591	1.24735	8.41475e-68	2.21981e-64	Null_Model_OpenChrom	human
Roadmapepigenomics_Histone_narrow	H1_Cell_Line	H3K23me2	8822	142340	0.0619784	7107.76	99.0194	17.3122	1.24118	1.90396e-67	5.02265e-64	Null_Model_OpenChrom	human
Roadmapepigenomics_Histone_narrow	H9_Derived_Neuronal_Progenitor_Cultured_Cells	H3K4me3	14308	142340	0.10052	12159.1	124.312	17.2867	1.17674	2.9639e-67	7.81876e-64	Null_Model_OpenChrom	human
Roadmapepigenomics_Histone_narrow	Skeletal_Muscle_Male	H3K4me3	19974	142340	0.140326	17364.8	151.209	17.2557	1.15026	5.06532e-67	1.33623e-63	Null_Model_OpenChrom	human
BroadChromHMM	HMEC	ActivePromoter	7294	142340	0.0512435	5729.3	90.9152	17.2105	1.2731	1.10766e-66	2.92201e-63	Null_Model_OpenChrom	human
Roadmapepigenomics_ActiveChromatin	CD4+_CD25-_Th_Primary	11_BivFlnk	2087	142340	0.0146621	1344.94	43.1456	17.199	1.55174	1.35007e-66	3.56149e-63	Null_Model_OpenChrom	human
Roadmapepigenomics_ActiveChromatin	Breast_vHMEC	10_TssBiv	954	142340	0.00670226	494.138	26.7736	17.1759	1.93064	2.01047e-66	5.30363e-63	Null_Model_OpenChrom	human
Roadmapepigenomics_Histone_narrow	H1_Cell_Line	H3K9ac	14040	142340	0.0986371	11904.9	124.344	17.1708	1.17934	2.19719e-66	5.79619e-63	Null_Model_OpenChrom	human
Roadmapepigenomics_ActiveChromatin	Fetal_Adrenal_Gland	10_TssBiv	1752	142340	0.0123086	1068	39.841	17.1683	1.64045	2.29325e-66	6.0496e-63	Null_Model_OpenChrom	human
Roadmapepigenomics_Histone_narrow	Brain_Hippocampus_Middle	H3K4me3	22483	142340	0.157953	19687.3	163.009	17.1504	1.142	3.12169e-66	8.23501e-63	Null_Model_OpenChrom	human
Roadmapepigenomics_Histone_narrow	Adipose_Nuclei	H3K4me3	21056	142340	0.147927	18550.9	146.535	17.0955	1.13504	8.01177e-66	2.11351e-62	Null_Model_OpenChrom	human
Roadmapepigenomics_Histone_narrow	Colon_Smooth_Muscle	H3K4me3	19301	142340	0.135598	16834.3	144.349	17.0883	1.14653	9.07509e-66	2.39401e-62	Null_Model_OpenChrom	human
Roadmapepigenomics_Histone_narrow	Colon_Smooth_Muscle	H3K9me3	2118	142340	0.0148799	1366.64	43.987	17.0815	1.54979	1.01951e-65	2.68947e-62	Null_Model_OpenChrom	human
Roadmapepigenomics_Histone_narrow	Fetal_Thymus	H3K4me3	13774	142340	0.0967683	11725.9	120.404	17.0101	1.17466	3.45548e-65	9.11556e-62	Null_Model_OpenChrom	human
Roadmapepigenomics_Histone_narrow	H1_Derived_Neuronal_Progenitor_Cultured_Cells	H4K8ac	15007	142340	0.105431	12796.1	130.116	16.9916	1.17278	4.73456e-65	1.24898e-61	Null_Model_OpenChrom	human
BroadChromHMM	HUVEC	WeakPromoter	5187	142340	0.0364409	3925.43	74.3602	16.9656	1.32138	7.37643e-65	1.9459e-61	Null_Model_OpenChrom	human
Roadmapepigenomics_ActiveChromatin	Fetal_Intestine_Small	10_TssBiv	2530	142340	0.0177743	1729.86	47.2072	16.9496	1.46255	9.69174e-65	2.55668e-61	Null_Model_OpenChrom	human
Roadmapepigenomics_ActiveChromatin	Chondrocytes_from_Bone_Marrow_Derived_Mesenchymal_Stem_Cell	11_BivFlnk	1564	142340	0.0109878	951.178	36.2678	16.8971	1.64428	2.36098e-64	6.22826e-61	Null_Model_OpenChrom	human
Roadmapepigenomics_Histone_narrow	HUES48_Cell_Line	H3K9ac	12771	142340	0.0897218	10737.6	120.415	16.8863	1.18937	2.83538e-64	7.47972e-61	Null_Model_OpenChrom	human
Roadmapepigenomics_Histone_narrow	iPS_DF_19.11_Cell_Line	H3K9me3	11910	142340	0.0836729	10039.3	111.38	16.7958	1.18634	1.30871e-63	3.45237e-60	Null_Model_OpenChrom	human
Roadmapepigenomics_ActiveChromatin	Colon_Smooth_Muscle	10_TssBiv	1733	142340	0.0121751	1087.74	38.495	16.7621	1.59321	2.3117e-63	6.09827e-60	Null_Model_OpenChrom	human
Roadmapepigenomics_ActiveChromatin	Duodenum_Smooth_Muscle	10_TssBiv	2942	142340	0.0206688	2043.45	53.7883	16.7052	1.43972	6.00262e-63	1.58349e-59	Null_Model_OpenChrom	human
Roadmapepigenomics_Histone_narrow	HeLa-S3_Cervical_Carcinoma	H3K9me3	3665	142340	0.0257482	2668.06	59.9577	16.6273	1.37365	2.21019e-62	5.83049e-59	Null_Model_OpenChrom	human
Roadmapepigenomics_Histone_narrow	Colonic_Mucosa	H3K4me3	19762	142340	0.138837	17359.6	144.573	16.617	1.13839	2.6265e-62	6.9287e-59	Null_Model_OpenChrom	human
Roadmapepigenomics_Histone_narrow	CD3_Primary_Cells_Peripheral_UWUW	H3K4me3	14196	142340	0.099733	12164.7	122.925	16.5249	1.16698	1.21498e-61	3.20512e-58	Null_Model_OpenChrom	human
Roadmapepigenomics_Histone_narrow	H1_Cell_Line	H4K5ac	12350	142340	0.0867641	10366.9	120.891	16.4041	1.19129	8.93308e-61	2.35655e-57	Null_Model_OpenChrom	human
Roadmapepigenomics_Histone_narrow	CD19_Primary_Cells_Cord_BI	H3K4me3	11421	142340	0.0802375	9575.36	112.653	16.3834	1.19275	1.25735e-60	3.31689e-57	Null_Model_OpenChrom	human
Roadmapepigenomics_ActiveChromatin	ES-I3	10_TssBiv	5860	142340	0.041169	4551.78	80.1387	16.3245	1.28741	3.30474e-60	8.71791e-57	Null_Model_OpenChrom	human
Roadmapepigenomics_Histone_narrow	Penis_Foreskin_Keratinocyte_Primary_Cells_skin02	H3K4me3	17874	142340	0.125573	15613.9	139.21	16.2349	1.14475	1.42883e-59	3.76925e-56	Null_Model_OpenChrom	human
BroadChromHMM	NHLF	PoisedPromoter	2270	142340	0.0159477	1559.2	43.971	16.1651	1.45587	4.44298e-59	1.17206e-55	Null_Model_OpenChrom	human
Roadmapepigenomics_ActiveChromatin	4star	10_TssBiv	1476	142340	0.0103695	905.982	35.3263	16.1358	1.62917	7.14775e-59	1.88558e-55	Null_Model_OpenChrom	human
BroadChromHMM	NHEK	PoisedPromoter	3398	142340	0.0238724	2491.56	56.2557	16.1129	1.36381	1.03488e-58	2.73e-55	Null_Model_OpenChrom	human
Roadmapepigenomics_ActiveChromatin	CD4+_CD25-_IL17+_PMA-Ionomcyin_stimulated_Th17_Primary	3_TxFlnk	4964	142340	0.0348742	3826.25	71.0778	16.0071	1.29735	5.70123e-58	1.50399e-54	Null_Model_OpenChrom	human
BroadChromHMM	HMEC	PoisedPromoter	2226	142340	0.0156386	1520.28	44.2462	15.9497	1.4642	1.43082e-57	3.7745e-54	Null_Model_OpenChrom	human
Roadmapepigenomics_Histone_narrow	H9_Derived_Neuron_Cultured_Cells	H3K4me3	14460	142340	0.101588	12506.1	122.869	15.9025	1.15624	3.04219e-57	8.0253e-54	Null_Model_OpenChrom	human
Roadmapepigenomics_Histone_narrow	Neurosphere_Cultured_Cells_Ganglionic_Eminence_Derived	H3K4me3	18941	142340	0.133069	16728.9	139.745	15.8295	1.13223	9.73424e-57	2.56789e-53	Null_Model_OpenChrom	human
Roadmapepigenomics_ActiveChromatin	CD4+_CD25int_CD127+_Tmem_Primary	10_TssBiv	889	142340	0.00624561	468.078	26.6081	15.8193	1.89926	1.14493e-56	3.02033e-53	Null_Model_OpenChrom	human
Roadmapepigenomics_ActiveChromatin	Fetal_Muscle_Leg	10_TssBiv	932	142340	0.0065477	518.956	26.1157	15.8159	1.79591	1.20823e-56	3.18732e-53	Null_Model_OpenChrom	human
Roadmapepigenomics_Histone_narrow	Mobilized_CD34_Primary_Cells_Female	H3K4me3	18843	142340	0.13238	16667.5	138.053	15.7584	1.13052	3.00838e-56	7.93609e-53	Null_Model_OpenChrom	human
Roadmapepigenomics_Histone_narrow	H1_BMP4_Derived_Mesendoderm_Cultured_Cells	H3K9me3	1703	142340	0.0119643	1092.64	38.7933	15.7335	1.5586	4.45539e-56	1.17533e-52	Null_Model_OpenChrom	human
Roadmapepigenomics_ActiveChromatin	Adipose_Nuclei	11_BivFlnk	2655	142340	0.0186525	1889.09	48.694	15.729	1.40544	4.78626e-56	1.26261e-52	Null_Model_OpenChrom	human
Roadmapepigenomics_Histone_narrow	Placenta_Amnion	H3K9me3	1832	142340	0.0128706	1183.42	41.2975	15.705	1.54805	6.984e-56	1.84238e-52	Null_Model_OpenChrom	human
BroadChromHMM	GM12878	PoisedPromoter	2479	142340	0.017416	1714.63	48.8019	15.6627	1.44579	1.35986e-55	3.5873e-52	Null_Model_OpenChrom	human
Roadmapepigenomics_ActiveChromatin	Fetal_Muscle_Leg	11_BivFlnk	2224	142340	0.0156246	1551.28	43.2258	15.5628	1.43365	6.51348e-55	1.71825e-51	Null_Model_OpenChrom	human
Roadmapepigenomics_Histone_narrow	NHDF-Ad_Adult_Dermal_Fibroblasts	H3K4me3	13566	142340	0.095307	11678.8	121.268	15.5622	1.16159	6.57029e-55	1.73324e-51	Null_Model_OpenChrom	human
Roadmapepigenomics_Histone_narrow	CD4+_CD25int_CD127+_Tmem_Primary_Cellsls	H3K4me3	15573	142340	0.109407	13625.4	125.323	15.5403	1.14294	9.25707e-55	2.44202e-51	Null_Model_OpenChrom	human
Roadmapepigenomics_Histone_narrow	H1_Cell_Line	H4K8ac	29162	142340	0.204876	26522.5	170.368	15.4932	1.09952	1.92838e-54	5.08707e-51	Null_Model_OpenChrom	human
Roadmapepigenomics_ActiveChromatin	CD56_Primary	12_EnhBiv	4030	142340	0.0283125	3046.63	63.6214	15.4566	1.32277	3.4076e-54	8.98924e-51	Null_Model_OpenChrom	human
Roadmapepigenomics_Histone_narrow	iPS_DF_19.11_Cell_Line	H3K27ac	16099	142340	0.113102	14104	129.086	15.4549	1.14145	3.49474e-54	9.21913e-51	Null_Model_OpenChrom	human
Roadmapepigenomics_Histone_narrow	H1_Derived_Neuronal_Progenitor_Cultured_Cells	H3K18ac	24579	142340	0.172678	22145.6	158.027	15.3988	1.10988	8.33574e-54	2.19897e-50	Null_Model_OpenChrom	human
Roadmapepigenomics_ActiveChromatin	CD4+_CD25int_CD127+_Tmem_Primary	11_BivFlnk	1377	142340	0.00967402	858.231	33.6893	15.3986	1.60446	8.35696e-54	2.20457e-50	Null_Model_OpenChrom	human
Roadmapepigenomics_Histone_narrow	Pancreatic_Islets	H3K9me3	899	142340	0.00631586	512.476	25.2521	15.3066	1.75423	3.45337e-53	9.10998e-50	Null_Model_OpenChrom	human
Roadmapepigenomics_Histone_narrow	H9_Cell_Line	H4K8ac	8653	142340	0.0607911	7232.16	93.3642	15.2183	1.19646	1.33753e-52	3.52841e-49	Null_Model_OpenChrom	human
Roadmapepigenomics_Histone_narrow	Rectal_Mucosa.Donor_31	H3K4me3	18935	142340	0.133027	16775.9	141.989	15.2062	1.1287	1.6092e-52	4.24506e-49	Null_Model_OpenChrom	human
Roadmapepigenomics_Histone_narrow	H1_Derived_Mesenchymal_Stem_Cells	H3K14ac	13401	142340	0.0941478	11582.1	120.49	15.0959	1.15704	8.61799e-52	2.27343e-48	Null_Model_OpenChrom	human
Roadmapepigenomics_Histone_narrow	HUES64_Cell_Line	H3K4me3	18652	142340	0.131038	16561.7	139.205	15.0159	1.12621	2.88661e-51	7.61487e-48	Null_Model_OpenChrom	human
Roadmapepigenomics_ActiveChromatin	Esophagus	11_BivFlnk	1008	142340	0.00708164	591.224	27.7624	15.0122	1.70494	3.05231e-51	8.05198e-48	Null_Model_OpenChrom	human
Roadmapepigenomics_Histone_narrow	iPS-15b_Cell_Line	H3K4me3	20041	142340	0.140797	17895	143.543	14.9504	1.11992	7.74194e-51	2.04232e-47	Null_Model_OpenChrom	human
Roadmapepigenomics_Histone_narrow	ES-WA7_Cell_Line	H3K9me3	4012	142340	0.028186	3104.26	60.7737	14.9364	1.29242	9.54719e-51	2.51855e-47	Null_Model_OpenChrom	human
Roadmapepigenomics_Histone_narrow	H1_BMP4_Derived_Mesendoderm_Cultured_Cells	H3K18ac	16906	142340	0.118772	14921.2	133.013	14.9218	1.13302	1.18869e-50	3.13576e-47	Null_Model_OpenChrom	human
Roadmapepigenomics_Histone_narrow	H1_Derived_Mesenchymal_Stem_Cells	H3K23ac	16764	142340	0.117774	14849.5	128.334	14.9182	1.12893	1.25523e-50	3.31128e-47	Null_Model_OpenChrom	human
Roadmapepigenomics_Histone_narrow	H1_BMP4_Derived_Mesendoderm_Cultured_Cells	H3K4ac	15755	142340	0.110686	13905.4	124.065	14.9082	1.13301	1.4569e-50	3.8433e-47	Null_Model_OpenChrom	human
Roadmapepigenomics_ActiveChromatin	Brain_Hippocampus_Middle	11_BivFlnk	2020	142340	0.0141914	1389.29	42.4449	14.8594	1.45398	3.02152e-50	7.97076e-47	Null_Model_OpenChrom	human
Roadmapepigenomics_ActiveChromatin	ES-WA7	10_TssBiv	2786	142340	0.0195729	2019.69	51.6255	14.8436	1.37942	3.82896e-50	1.01008e-46	Null_Model_OpenChrom	human
Roadmapepigenomics_Histone_narrow	H1_Derived_Neuronal_Progenitor_Cultured_Cells	H2BK120ac	8471	142340	0.0595124	7072.53	94.2271	14.8415	1.19773	3.94855e-50	1.04163e-46	Null_Model_OpenChrom	human
Roadmapepigenomics_Histone_narrow	HUES48_Cell_Line	H3K4me3	19078	142340	0.134031	17077.2	135.03	14.8174	1.11716	5.65515e-50	1.49183e-46	Null_Model_OpenChrom	human
BroadChromHMM	HepG2	ActivePromoter	8017	142340	0.0563229	6672.32	91.2904	14.7297	1.20153	2.07654e-49	5.47792e-46	Null_Model_OpenChrom	human
Roadmapepigenomics_Dnase_narrow	NHLF_Lung_Fibroblasts	Dnase	39700	142340	0.27891	36890.1	190.817	14.7258	1.07617	2.19967e-49	5.80273e-46	Null_Model_OpenChrom	human
Roadmapepigenomics_Histone_narrow	Breast_Myoepithelial_Cells	H3K4me3	17937	142340	0.126015	15984	132.876	14.6981	1.12219	3.31246e-49	8.73828e-46	Null_Model_OpenChrom	human
Roadmapepigenomics_ActiveChromatin	Esophagus	2_TssAFlnk	3615	142340	0.0253969	2790.74	56.447	14.6024	1.29536	1.35486e-48	3.57412e-45	Null_Model_OpenChrom	human
MegaMPRA_SNPs	K562	none	1023	142340	0.00718702	626.059	27.3808	14.497	1.63403	6.32386e-48	1.66823e-44	Null_Model_OpenChrom	human
Roadmapepigenomics_ActiveChromatin	CD4+_CD25-_CD45RO+_Memory_Primary	12_EnhBiv	2743	142340	0.0192708	2005.99	51.0824	14.4279	1.36741	1.7264e-47	4.55424e-44	Null_Model_OpenChrom	human
Roadmapepigenomics_Histone_narrow	H1_BMP4_Derived_Mesendoderm_Cultured_Cells	H2BK120ac	12438	142340	0.0873823	10787	115.066	14.3479	1.15305	5.49418e-47	1.44937e-43	Null_Model_OpenChrom	human
Roadmapepigenomics_ActiveChromatin	Fetal_Brain_Male	1_TssA	5547	142340	0.0389701	4485.73	74.0432	14.3331	1.23659	6.79879e-47	1.79352e-43	Null_Model_OpenChrom	human
Roadmapepigenomics_Histone_narrow	HUVEC_Umbilical_Vein_Endothelial_Cells	H3K4me3	15167	142340	0.106555	13479.7	118.074	14.2905	1.12518	1.25376e-46	3.30741e-43	Null_Model_OpenChrom	human
Roadmapepigenomics_Histone_narrow	Chondrocytes_from_Bone_Marrow_Derived_Mesenchymal_Stem_Cell_Cultured_Cells	H3K4me3	21504	142340	0.151075	19435.6	145.257	14.2397	1.10642	2.59786e-46	6.85317e-43	Null_Model_OpenChrom	human
Roadmapepigenomics_ActiveChromatin	Duodenum_Mucosa	10_TssBiv	1917	142340	0.0134678	1334.93	40.9887	14.2008	1.43603	4.53041e-46	1.19512e-42	Null_Model_OpenChrom	human
Roadmapepigenomics_Histone_narrow	ES-I3_Cell_Line	H3K4me3	19542	142340	0.137291	17506.7	144.528	14.0824	1.11626	2.43469e-45	6.42271e-42	Null_Model_OpenChrom	human
Roadmapepigenomics_ActiveChromatin	Fetal_Intestine_Large	11_BivFlnk	1934	142340	0.0135872	1362.63	40.5913	14.0762	1.41932	2.65818e-45	7.01228e-42	Null_Model_OpenChrom	human
Roadmapepigenomics_ActiveChromatin	CD4+_CD25-_IL17+_PMA-Ionomcyin_stimulated_Th17_Primary	11_BivFlnk	1108	142340	0.00778418	707.941	28.6341	13.9714	1.5651	1.16443e-44	3.07177e-41	Null_Model_OpenChrom	human
Roadmapepigenomics_ActiveChromatin	CD19_Primary_Peripheral_UW	12_EnhBiv	4202	142340	0.0295209	3326.48	62.7693	13.9482	1.2632	1.61312e-44	4.25541e-41	Null_Model_OpenChrom	human
Roadmapepigenomics_ActiveChromatin	Colonic_Mucosa	10_TssBiv	1873	142340	0.0131586	1307.6	40.5685	13.9368	1.43239	1.8919e-44	4.99082e-41	Null_Model_OpenChrom	human
Roadmapepigenomics_Histone_narrow	Stomach_Smooth_Muscle	H3K9ac	15202	142340	0.106801	13498.1	123.38	13.8099	1.12623	1.11055e-43	2.92964e-40	Null_Model_OpenChrom	human
Roadmapepigenomics_ActiveChromatin	Dnd41_TCell_Leukemia	11_BivFlnk	1030	142340	0.0072362	635.102	28.6912	13.7637	1.62179	2.10609e-43	5.55587e-40	Null_Model_OpenChrom	human
Roadmapepigenomics_Histone_narrow	CD4+_CD25-_Th_Primary_Cells-I	H3K4me3	16028	142340	0.112604	14342.2	122.595	13.7507	1.11754	2.52314e-43	6.65604e-40	Null_Model_OpenChrom	human
Roadmapepigenomics_Histone_narrow	Skeletal_Muscle_Female	H3K4me3	21106	142340	0.148279	19126	144.273	13.7237	1.10352	3.66075e-43	9.65705e-40	Null_Model_OpenChrom	human
Roadmapepigenomics_Histone_narrow	HSMMtube_Skeletal_Muscle_Myotubes_Derived_from_HSMM	H2A.Z	25654	142340	0.18023	23602.9	149.792	13.6932	1.0869	5.576e-43	1.47095e-39	Null_Model_OpenChrom	human
Roadmapepigenomics_Histone_narrow	CD4+_CD25-_CD45RA+_Naive_Primary_Cellsd_	H3K4me3	16677	142340	0.117163	14978.3	124.699	13.6225	1.11341	1.47149e-42	3.88178e-39	Null_Model_OpenChrom	human
Roadmapepigenomics_ActiveChromatin	CD34_Primary	2_TssAFlnk	10748	142340	0.0755093	9320.2	105.402	13.5462	1.15319	4.16927e-42	1.09985e-38	Null_Model_OpenChrom	human
BroadChromHMM	GM12878	ActivePromoter	8041	142340	0.0564915	6829.79	89.4335	13.5431	1.17734	4.3494e-42	1.14737e-38	Null_Model_OpenChrom	human
Roadmapepigenomics_Histone_narrow	H1_BMP4_Derived_Trophoblast_Cultured_Cells	H4K8ac	23122	142340	0.162442	21086.7	150.303	13.5413	1.09652	4.46112e-42	1.17684e-38	Null_Model_OpenChrom	human
Roadmapepigenomics_ActiveChromatin	Duodenum_Smooth_Muscle	11_BivFlnk	2023	142340	0.0142124	1445.56	42.787	13.4956	1.39945	8.30024e-42	2.1896e-38	Null_Model_OpenChrom	human
DNaseClusters	Osteobl	Dnase	37460	142340	0.263173	35029.1	180.339	13.4796	1.0694	1.0314e-41	2.72082e-38	Null_Model_OpenChrom	human
Roadmapepigenomics_ActiveChromatin	Fetal_Intestine_Small	11_BivFlnk	2163	142340	0.015196	1556.71	45.1993	13.4137	1.38947	2.51315e-41	6.6297e-38	Null_Model_OpenChrom	human
Roadmapepigenomics_Histone_narrow	Colonic_Mucosa	H3K9ac	18063	142340	0.1269	16233.8	137.036	13.3481	1.11268	6.07266e-41	1.60197e-37	Null_Model_OpenChrom	human
Roadmapepigenomics_Histone_narrow	iPS-18_Cell_Line	H3K9ac	15167	142340	0.106555	13576.2	119.286	13.3356	1.11717	7.18335e-41	1.89497e-37	Null_Model_OpenChrom	human
Roadmapepigenomics_ActiveChromatin	Duodenum_Mucosa	11_BivFlnk	1926	142340	0.013531	1368.42	41.8889	13.3109	1.40746	1.00089e-40	2.64036e-37	Null_Model_OpenChrom	human
Roadmapepigenomics_Histone_narrow	Rectal_Smooth_Muscle	H3K4me3	20627	142340	0.144914	18766.4	140.072	13.2835	1.09915	1.44292e-40	3.80642e-37	Null_Model_OpenChrom	human
Roadmapepigenomics_Histone_narrow	H9_Cell_Line	H3K9ac	14441	142340	0.101454	12881.4	117.506	13.2725	1.12107	1.6713e-40	4.40889e-37	Null_Model_OpenChrom	human
Roadmapepigenomics_ActiveChromatin	Breast_Myoepithelial	11_BivFlnk	1303	142340	0.00915414	865.42	33.0629	13.2348	1.50563	2.76277e-40	7.28819e-37	Null_Model_OpenChrom	human
Roadmapepigenomics_Histone_narrow	H1_Cell_Line	H3K4me2	28712	142340	0.201714	26592.7	160.415	13.2115	1.0797	3.76708e-40	9.93757e-37	Null_Model_OpenChrom	human
Roadmapepigenomics_Histone_narrow	H1_Cell_Line	H3K56ac	5936	142340	0.041703	4928.67	76.4081	13.1835	1.20438	5.4598e-40	1.44029e-36	Null_Model_OpenChrom	human
DNaseI_Duke	GM12982	Dnase	36937	142340	0.259498	34521.7	184.275	13.1069	1.06996	1.50361e-39	3.96651e-36	Null_Model_OpenChrom	human
Roadmapepigenomics_Histone_narrow	HepG2_Hepatocellular_Carcinoma	H3K4me3	18337	142340	0.128825	16581	134.72	13.0346	1.10591	3.88667e-39	1.0253e-35	Null_Model_OpenChrom	human
Roadmapepigenomics_ActiveChromatin	Brain_Inferior_Temporal_Lobe	11_BivFlnk	1071	142340	0.00752424	699.241	28.5772	13.0089	1.53166	5.44202e-39	1.4356e-35	Null_Model_OpenChrom	human
BroadChromHMM	K562	PoisedPromoter	1478	142340	0.0103836	1036.73	33.9405	13.0013	1.42564	6.01507e-39	1.58678e-35	Null_Model_OpenChrom	human
Roadmapepigenomics_ActiveChromatin	CD19_Primary_Cord_BI	11_BivFlnk	1255	142340	0.00881692	838.974	32.2384	12.9047	1.49587	2.11823e-38	5.5879e-35	Null_Model_OpenChrom	human
Roadmapepigenomics_Histone_narrow	Penis_Foreskin_Keratinocyte_Primary_Cells_skin03	H3K4me3	18870	142340	0.13257	17195.3	130.005	12.8815	1.09739	2.8602e-38	7.5452e-35	Null_Model_OpenChrom	human
Roadmapepigenomics_ActiveChromatin	CD8_Naive_Primary	11_BivFlnk	762	142340	0.00535338	464.614	23.3601	12.7305	1.64007	2.00116e-37	5.27905e-34	Null_Model_OpenChrom	human
Roadmapepigenomics_ActiveChromatin	CD4+_CD25-_CD45RA+_Naive_Primary	11_BivFlnk	1441	142340	0.0101236	1017.8	33.3868	12.6756	1.4158	4.03556e-37	1.06458e-33	Null_Model_OpenChrom	human
Roadmapepigenomics_Histone_narrow	H9_Cell_Line	H3K9me3	7680	142340	0.0539553	6593.21	85.8574	12.6581	1.16483	5.0461e-37	1.33116e-33	Null_Model_OpenChrom	human
Roadmapepigenomics_ActiveChromatin	CD4+_CD25-_IL17-_PMA-Ionomycin_stimulated_MACS_purified_Th_Primary	12_EnhBiv	3076	142340	0.0216102	2410.05	52.7007	12.6365	1.27632	6.64021e-37	1.75169e-33	Null_Model_OpenChrom	human
Roadmapepigenomics_Histone_narrow	CD4+_CD25-_IL17+_PMA-Ionomcyin_stimulated_Th17_Primary_Cells	H3K4me3	15904	142340	0.111732	14349.5	123.214	12.6165	1.10833	8.55901e-37	2.25787e-33	Null_Model_OpenChrom	human
DNaseI_Duke	Psoas_muscle_OC	Dnase	34679	142340	0.243635	32486	173.947	12.6073	1.06751	9.62191e-37	2.53826e-33	Null_Model_OpenChrom	human
Roadmapepigenomics_Dnase_narrow	NH-A_Astrocytes	Dnase	38505	142340	0.270514	36275	176.969	12.601	1.06147	1.04272e-36	2.75069e-33	Null_Model_OpenChrom	human
Roadmapepigenomics_Histone_narrow	Duodenum_Mucosa	H3K9ac	18054	142340	0.126837	16374	133.334	12.6003	1.1026	1.05118e-36	2.77302e-33	Null_Model_OpenChrom	human
Roadmapepigenomics_ActiveChromatin	Brain_Hippocampus_Middle	10_TssBiv	1967	142340	0.013819	1449.33	41.2468	12.5505	1.35718	1.97539e-36	5.21109e-33	Null_Model_OpenChrom	human
BroadChromHMM	NHLF	WeakPromoter	5871	142340	0.0412463	4953.51	73.2221	12.5302	1.18522	2.55282e-36	6.73434e-33	Null_Model_OpenChrom	human
Roadmapepigenomics_Histone_narrow	CD4+_CD25+_CD127-_Treg_Primary_CellsTh	H3K4me3	17106	142340	0.120177	15472.7	131.273	12.4418	1.10556	7.74561e-36	2.04329e-32	Null_Model_OpenChrom	human
Roadmapepigenomics_Histone_narrow	H1_Cell_Line	H3K18ac	18955	142340	0.133167	17276.7	135.297	12.4042	1.09714	1.24014e-35	3.27149e-32	Null_Model_OpenChrom	human
Roadmapepigenomics_ActiveChromatin	CD4+_CD25+_CD127-_Treg_Primary	12_EnhBiv	2030	142340	0.0142616	1511.61	41.8449	12.3883	1.34294	1.51156e-35	3.98749e-32	Null_Model_OpenChrom	human
Roadmapepigenomics_ActiveChromatin	CD56_Primary	2_TssAFlnk	6843	142340	0.048075	5857.43	80.0241	12.3159	1.16826	3.71997e-35	9.81328e-32	Null_Model_OpenChrom	human
Roadmapepigenomics_ActiveChromatin	Brain_Cingulate_Gyrus	10_TssBiv	1876	142340	0.0131797	1374.17	40.8658	12.28	1.36519	5.79638e-35	1.52909e-31	Null_Model_OpenChrom	human
Roadmapepigenomics_Histone_narrow	Duodenum_Smooth_Muscle	H3K4me3	20433	142340	0.143551	18763	136.55	12.2297	1.089	1.07933e-34	2.84727e-31	Null_Model_OpenChrom	human
Roadmapepigenomics_ActiveChromatin	Fetal_Lung	10_TssBiv	1148	142340	0.0080652	785.188	29.6761	12.2257	1.46207	1.13257e-34	2.98772e-31	Null_Model_OpenChrom	human
Roadmapepigenomics_Histone_narrow	HUES64_Cell_Line	H3K9ac	15688	142340	0.110215	14178.9	124.264	12.1446	1.10644	3.0645e-34	8.08414e-31	Null_Model_OpenChrom	human
Roadmapepigenomics_Histone_narrow	CD4_Naive_Primary_Cells	H3K4me3	14261	142340	0.10019	12879.2	113.798	12.1426	1.10729	3.14002e-34	8.28336e-31	Null_Model_OpenChrom	human
Roadmapepigenomics_Histone_narrow	CD4+_CD25-_CD45RO+_Memory_Primary_Cells	H3K4me3	13531	142340	0.0950611	12161.6	113.027	12.1155	1.1126	4.37188e-34	1.1533e-30	Null_Model_OpenChrom	human
Roadmapepigenomics_Histone_narrow	iPS-18_Cell_Line	H3K4me3	18654	142340	0.131052	17055.5	132.022	12.1077	1.09372	4.81024e-34	1.26894e-30	Null_Model_OpenChrom	human
Roadmapepigenomics_Histone_narrow	CD4_Memory_Primary_Cells	H3K4me3	13444	142340	0.0944499	12126.1	109.649	12.0193	1.10868	1.40723e-33	3.71226e-30	Null_Model_OpenChrom	human
Roadmapepigenomics_Histone_narrow	CD34_Cultured_Cells	H3K4me3	15603	142340	0.109618	14123.3	124.788	11.8577	1.10477	9.81221e-33	2.58846e-29	Null_Model_OpenChrom	human
Roadmapepigenomics_Histone_narrow	HUES6_Cell_Line	H3K4me3	19948	142340	0.140143	18283.3	140.919	11.813	1.09105	1.67204e-32	4.41084e-29	Null_Model_OpenChrom	human
Roadmapepigenomics_ActiveChromatin	Breast_vHMEC	12_EnhBiv	1596	142340	0.0112126	1164.59	36.7093	11.752	1.37044	3.4472e-32	9.09372e-29	Null_Model_OpenChrom	human
Roadmapepigenomics_Histone_narrow	Adult_Liver	H3K9ac	16991	142340	0.119369	15534.8	124.519	11.6949	1.09374	6.76683e-32	1.78509e-28	Null_Model_OpenChrom	human
Roadmapepigenomics_Histone_narrow	Thymus	H3K9me3	1570	142340	0.0110299	1153.29	35.7366	11.6606	1.36132	1.01285e-31	2.67189e-28	Null_Model_OpenChrom	human
Roadmapepigenomics_ActiveChromatin	Esophagus	10_TssBiv	795	142340	0.00558522	510.555	24.498	11.6109	1.55713	1.81308e-31	4.78292e-28	Null_Model_OpenChrom	human
Roadmapepigenomics_ActiveChromatin	CD14_Primary	12_EnhBiv	3725	142340	0.0261697	3047.19	58.758	11.5357	1.22244	4.36016e-31	1.15021e-27	Null_Model_OpenChrom	human
Roadmapepigenomics_ActiveChromatin	Fetal_Brain_Male	12_EnhBiv	4517	142340	0.0317339	3771.45	64.9601	11.477	1.19768	8.60659e-31	2.27042e-27	Null_Model_OpenChrom	human
Roadmapepigenomics_ActiveChromatin	CD34_Primary	11_BivFlnk	1422	142340	0.00999016	1031.91	34.1492	11.423	1.37802	1.60526e-30	4.23468e-27	Null_Model_OpenChrom	human
Roadmapepigenomics_Histone_narrow	Stomach_Smooth_Muscle	H3K4me3	23101	142340	0.162295	21443.4	146.613	11.306	1.0773	6.12776e-30	1.6165e-26	Null_Model_OpenChrom	human
Roadmapepigenomics_Histone_narrow	NHLF_Lung_Fibroblasts	H3K9me3	746	142340	0.00524097	484.713	23.2283	11.2486	1.53905	1.1761e-29	3.10256e-26	Null_Model_OpenChrom	human
Roadmapepigenomics_Histone_narrow	Stomach_Mucosa	H3K9me3	1312	142340	0.00921737	941.89	33.179	11.1549	1.39294	3.38713e-29	8.93525e-26	Null_Model_OpenChrom	human
Roadmapepigenomics_ActiveChromatin	Fetal_Brain_Female	11_BivFlnk	1839	142340	0.0129198	1403.3	40.4136	10.7811	1.31049	2.1134e-27	5.57515e-24	Null_Model_OpenChrom	human
Roadmapepigenomics_Histone_narrow	K562_Leukemia	H3K4me2	18994	142340	0.133441	17646.7	126.794	10.6258	1.07635	1.13016e-26	2.98136e-23	Null_Model_OpenChrom	human
Roadmapepigenomics_Histone_narrow	H9_Derived_Neuron_Cultured_Cells	H3K9me3	6444	142340	0.0452719	5626.04	77.2674	10.586	1.14539	1.72967e-26	4.56286e-23	Null_Model_OpenChrom	human
Roadmapepigenomics_ActiveChromatin	CD15_Primary	12_EnhBiv	2306	142340	0.0162006	1828.41	45.5591	10.4829	1.26121	5.1764e-26	1.36554e-22	Null_Model_OpenChrom	human
Roadmapepigenomics_ActiveChromatin	iPS_DF_6.9	ActiveChromatin	24907	142340	0.174982	23339.8	149.769	10.464	1.06715	6.31896e-26	1.66694e-22	Null_Model_OpenChrom	human
Roadmapepigenomics_ActiveChromatin	Brain_Cingulate_Gyrus	11_BivFlnk	1092	142340	0.00767177	787.078	29.2136	10.4377	1.38741	8.34311e-26	2.20091e-22	Null_Model_OpenChrom	human
Roadmapepigenomics_Histone_narrow	iPS_DF_6.9_Cell_Line	H3K9me3	1970	142340	0.0138401	1538.95	41.4228	10.4061	1.28009	1.16244e-25	3.0665e-22	Null_Model_OpenChrom	human
Roadmapepigenomics_Histone_narrow	Fetal_Brain_Male	H3K4me3	6770	142340	0.0475622	5956.75	78.3022	10.386	1.13652	1.43593e-25	3.78799e-22	Null_Model_OpenChrom	human
Roadmapepigenomics_Histone_narrow	Mobilized_CD34_Primary_Cells_Male	H3K4me3	22322	142340	0.156822	20851.9	142.036	10.3504	1.0705	2.08351e-25	5.49629e-22	Null_Model_OpenChrom	human
DNaseClusters	Fibrobl	Dnase	39132	142340	0.274919	37346.5	174.405	10.2379	1.04781	6.70566e-25	1.76895e-21	Null_Model_OpenChrom	human
Roadmapepigenomics_Histone_narrow	Penis_Foreskin_Melanocyte_Primary_Cells_skin03	H3K27me3	17708	142340	0.124406	16415.6	126.25	10.2371	1.07873	6.76331e-25	1.78416e-21	Null_Model_OpenChrom	human
Roadmapepigenomics_Histone_narrow	K562_Leukemia	H3K4me3	14619	142340	0.102705	13438.9	115.692	10.2001	1.08781	9.89989e-25	2.61159e-21	Null_Model_OpenChrom	human
Roadmapepigenomics_ActiveChromatin	Brain_Dorsolateral_Prefrontal_Cortex	10_TssBiv	1579	142340	0.0110932	1206.86	36.7695	10.1208	1.30835	2.23425e-24	5.89394e-21	Null_Model_OpenChrom	human
Roadmapepigenomics_Histone_narrow	H1_Derived_Mesenchymal_Stem_Cells	H4K8ac	22214	142340	0.156063	20756.3	144.104	10.1156	1.07023	2.3562e-24	6.21564e-21	Null_Model_OpenChrom	human
Roadmapepigenomics_Histone_narrow	H9_Cell_Line	H2BK15ac	4905	142340	0.0344597	4243.66	65.9567	10.0269	1.15584	5.80318e-24	1.53088e-20	Null_Model_OpenChrom	human
Roadmapepigenomics_Histone_narrow	Duodenum_Mucosa	H3K4me3	21256	142340	0.149333	19897.8	135.645	10.013	1.06826	6.68314e-24	1.76301e-20	Null_Model_OpenChrom	human
BroadChromHMM	HepG2	PoisedPromoter	2367	142340	0.0166292	1921.24	44.5861	9.99763	1.23201	7.80469e-24	2.05888e-20	Null_Model_OpenChrom	human
Roadmapepigenomics_ActiveChromatin	Breast_Myoepithelial	10_TssBiv	966	142340	0.00678657	686.156	28.218	9.91721	1.40784	1.75211e-23	4.62206e-20	Null_Model_OpenChrom	human
Roadmapepigenomics_Histone_narrow	H9_Cell_Line	H3K56ac	8774	142340	0.0616411	7894.07	88.8299	9.90573	1.11147	1.96541e-23	5.18474e-20	Null_Model_OpenChrom	human
Roadmapepigenomics_ActiveChromatin	CD8_Naive_Primary	12_EnhBiv	1917	142340	0.0134678	1518.67	40.2874	9.88715	1.26229	2.36649e-23	6.24279e-20	Null_Model_OpenChrom	human
Roadmapepigenomics_ActiveChromatin	Brain_Inferior_Temporal_Lobe	10_TssBiv	1532	142340	0.010763	1168.44	37.4298	9.71304	1.31115	1.32646e-22	3.49921e-19	Null_Model_OpenChrom	human
Roadmapepigenomics_Histone_narrow	CD8_Memory_Primary_Cells	H3K4me3	13378	142340	0.0939862	12310.9	110.537	9.65357	1.08668	2.37363e-22	6.26165e-19	Null_Model_OpenChrom	human
Roadmapepigenomics_Histone_narrow	H1_Derived_Neuronal_Progenitor_Cultured_Cells	H3K27ac	8853	142340	0.0621962	8008.47	88.6631	9.52513	1.10545	8.24176e-22	2.17418e-18	Null_Model_OpenChrom	human
Roadmapepigenomics_Histone_narrow	H9_Cell_Line	H2BK120ac	8283	142340	0.0581917	7454.45	87.3806	9.48209	1.11115	1.24618e-21	3.28743e-18	Null_Model_OpenChrom	human
Roadmapepigenomics_ActiveChromatin	CD19_Primary_Cord_BI	12_EnhBiv	1640	142340	0.0115217	1293.44	36.7346	9.43424	1.26794	1.96921e-21	5.19478e-18	Null_Model_OpenChrom	human
Roadmapepigenomics_Histone_narrow	H1_Derived_Neuronal_Progenitor_Cultured_Cells	H3K9ac	24976	142340	0.175467	23635.2	144.169	9.30044	1.05673	6.99299e-21	1.84475e-17	Null_Model_OpenChrom	human
Roadmapepigenomics_Histone_narrow	hESC_Derived_CD184+_Endoderm_Cultured_Cells	H3K9ac	12266	142340	0.0861739	11295.5	105.001	9.24314	1.08592	1.19685e-20	3.15728e-17	Null_Model_OpenChrom	human
DNaseI_Duke	Monocytes_CD14+	Dnase	33926	142340	0.238345	32358	171.191	9.15921	1.04846	2.61386e-20	6.89535e-17	Null_Model_OpenChrom	human
Roadmapepigenomics_ActiveChromatin	Colon_Smooth_Muscle	11_BivFlnk	774	142340	0.00543768	545.02	25.1398	9.10828	1.42013	4.18486e-20	1.10397e-16	Null_Model_OpenChrom	human
Roadmapepigenomics_ActiveChromatin	ES-WA7	ActiveChromatin	22433	142340	0.157602	21159	140.998	9.03536	1.06021	8.17335e-20	2.15613e-16	Null_Model_OpenChrom	human
Roadmapepigenomics_Histone_narrow	Osteoblasts	H3K4me3	20440	142340	0.1436	19238.3	134.328	8.94599	1.06246	1.84315e-19	4.86224e-16	Null_Model_OpenChrom	human
Roadmapepigenomics_Histone_narrow	Penis_Foreskin_Melanocyte_Primary_Cells_skin01	H3K27ac	12848	142340	0.0902628	11894.1	107.122	8.90517	1.0802	2.66511e-19	7.03057e-16	Null_Model_OpenChrom	human
Roadmapepigenomics_ActiveChromatin	Colonic_Mucosa	2_TssAFlnk	5876	142340	0.0412814	5192.92	77.0623	8.86401	1.13154	3.85944e-19	1.01812e-15	Null_Model_OpenChrom	human
Roadmapepigenomics_ActiveChromatin	CD4+_CD25int_CD127+_Tmem_Primary	12_EnhBiv	1452	142340	0.0102009	1137.07	35.6139	8.84281	1.27696	4.66687e-19	1.23112e-15	Null_Model_OpenChrom	human
Roadmapepigenomics_ActiveChromatin	Fetal_Lung	11_BivFlnk	1178	142340	0.00827596	907.732	30.957	8.73043	1.29774	1.26852e-18	3.34635e-15	Null_Model_OpenChrom	human
Roadmapepigenomics_Histone_narrow	Rectal_Mucosa.Donor_31	H3K9ac	18994	142340	0.133441	17841.8	132.53	8.69351	1.06458	1.75705e-18	4.6351e-15	Null_Model_OpenChrom	human
Roadmapepigenomics_ActiveChromatin	Adult_Liver	12_EnhBiv	1635	142340	0.0114866	1309.89	37.5029	8.66896	1.2482	2.18051e-18	5.75217e-15	Null_Model_OpenChrom	human
Roadmapepigenomics_Histone_narrow	Penis_Foreskin_Melanocyte_Primary_Cells_skin01	H3K9me3	4485	142340	0.0315091	3944.77	62.4562	8.64967	1.13695	2.58249e-18	6.8126e-15	Null_Model_OpenChrom	human
Roadmapepigenomics_Histone_narrow	K562_Leukemia	H3K9me3	747	142340	0.005248	537.825	24.3728	8.5823	1.38893	4.6498e-18	1.22662e-14	Null_Model_OpenChrom	human
Roadmapepigenomics_ActiveChromatin	CD4+_CD25-_IL17+_PMA-Ionomcyin_stimulated_Th17_Primary	12_EnhBiv	1925	142340	0.013524	1575.91	40.6906	8.57924	1.22152	4.77522e-18	1.2597e-14	Null_Model_OpenChrom	human
Roadmapepigenomics_Histone_narrow	H1_BMP4_Derived_Mesendoderm_Cultured_Cells	H2BK15ac	5247	142340	0.0368624	4637.48	71.1434	8.56753	1.13143	5.28649e-18	1.39458e-14	Null_Model_OpenChrom	human
Roadmapepigenomics_ActiveChromatin	CD3_Primary_Cord_BI	11_BivFlnk	1288	142340	0.00904876	1006.66	32.8496	8.56451	1.27948	5.42666e-18	1.43155e-14	Null_Model_OpenChrom	human
Roadmapepigenomics_ActiveChromatin	Brain_Dorsolateral_Prefrontal_Cortex	11_BivFlnk	773	142340	0.00543066	558.884	25.0457	8.549	1.38311	6.2081e-18	1.6377e-14	Null_Model_OpenChrom	human
Roadmapepigenomics_ActiveChromatin	Brain_Substantia_Nigra	10_TssBiv	847	142340	0.00595054	618.539	26.7714	8.53376	1.36935	7.08328e-18	1.86857e-14	Null_Model_OpenChrom	human
Roadmapepigenomics_Histone_narrow	Chondrocytes_from_Bone_Marrow_Derived_Mesenchymal_Stem_Cell_Cultured_Cells	H3K9ac	19496	142340	0.136968	18387.7	131.633	8.41991	1.06028	1.88394e-17	4.96982e-14	Null_Model_OpenChrom	human
Roadmapepigenomics_Histone_narrow	iPS-20b_Cell_Line	H3K4me3	20326	142340	0.142799	19156.3	139.514	8.38408	1.06106	2.5561e-17	6.74298e-14	Null_Model_OpenChrom	human
Roadmapepigenomics_ActiveChromatin	Brain_Angular_Gyrus	10_TssBiv	1037	142340	0.00728537	797.824	28.5341	8.3821	1.29979	2.59949e-17	6.85746e-14	Null_Model_OpenChrom	human
Roadmapepigenomics_Histone_narrow	H1_BMP4_Derived_Trophoblast_Cultured_Cells	H3K23ac	1021	142340	0.00717297	783.421	28.4395	8.35384	1.30326	3.30396e-17	8.71585e-14	Null_Model_OpenChrom	human
Roadmapepigenomics_Histone_narrow	Rectal_Mucosa.Donor_29	H3K9ac	16222	142340	0.113967	15226.7	123.722	8.04429	1.06536	4.33727e-16	1.14417e-12	Null_Model_OpenChrom	human
Roadmapepigenomics_Histone_narrow	Gastric	H3K27me3	1951	142340	0.0137066	1613	42.2446	8.00105	1.20955	6.16796e-16	1.62711e-12	Null_Model_OpenChrom	human
Roadmapepigenomics_Histone_narrow	CD15_Primary_Cellst_	H3K4me3	15472	142340	0.108697	14532.9	117.748	7.97568	1.06462	7.57745e-16	1.99893e-12	Null_Model_OpenChrom	human
Roadmapepigenomics_Histone_narrow	H1_Derived_Neuronal_Progenitor_Cultured_Cells	H2BK15ac	8012	142340	0.0562878	7361.88	81.8844	7.93951	1.08831	1.01491e-15	2.67734e-12	Null_Model_OpenChrom	human
Roadmapepigenomics_ActiveChromatin	4star	11_BivFlnk	1877	142340	0.0131867	1559.4	40.2781	7.88513	1.20367	1.57103e-15	4.14438e-12	Null_Model_OpenChrom	human
Roadmapepigenomics_ActiveChromatin	Adipose_Derived_Mesenchymal_Stem_Cell	11_BivFlnk	790	142340	0.00555009	592.378	25.1097	7.87036	1.33361	1.76813e-15	4.66433e-12	Null_Model_OpenChrom	human
Roadmapepigenomics_Histone_narrow	HSMMtube_Skeletal_Muscle_Myotubes_Derived_from_HSMM	H3K4me3	16790	142340	0.117957	15848.9	120.187	7.83033	1.05938	2.43294e-15	6.4181e-12	Null_Model_OpenChrom	human
Roadmapepigenomics_Histone_narrow	H1_Derived_Neuronal_Progenitor_Cultured_Cells	H3K14ac	14670	142340	0.103063	13796.4	113.668	7.6851	1.06332	7.644e-15	2.01649e-11	Null_Model_OpenChrom	human
Roadmapepigenomics_ActiveChromatin	Brain_Anterior_Caudate	10_TssBiv	1121	142340	0.00787551	888.433	30.8238	7.54506	1.26177	2.26032e-14	5.96274e-11	Null_Model_OpenChrom	human
Roadmapepigenomics_ActiveChromatin	Adipose_Nuclei	2_TssAFlnk	11152	142340	0.0783476	10393.5	103.551	7.32473	1.07298	1.19695e-13	3.15754e-10	Null_Model_OpenChrom	human
Roadmapepigenomics_Histone_narrow	HSMM_Skeletal_Muscle_Myoblasts	H3K9me3	929	142340	0.00652663	721.8	28.4631	7.2796	1.28706	1.67402e-13	4.41608e-10	Null_Model_OpenChrom	human
Roadmapepigenomics_ActiveChromatin	Fetal_Brain_Male	11_BivFlnk	933	142340	0.00655473	735.698	27.5769	7.15461	1.26818	4.19549e-13	1.10677e-09	Null_Model_OpenChrom	human
Roadmapepigenomics_ActiveChromatin	CD19_Primary_Peripheral_UW	2_TssAFlnk	6388	142340	0.0448785	5867.54	75.4352	6.89938	1.0887	2.61143e-12	6.88894e-09	Null_Model_OpenChrom	human
Roadmapepigenomics_ActiveChromatin	CD4+_CD25+_CD127-_Treg_Primary	3_TxFlnk	1426	142340	0.0100183	1169.32	37.2712	6.8867	1.21951	2.85516e-12	7.53192e-09	Null_Model_OpenChrom	human
Roadmapepigenomics_Histone_narrow	iPS-15b_Cell_Line	H3K9ac	17609	142340	0.123711	16748.2	125.767	6.84434	1.0514	3.84147e-12	1.01338e-08	Null_Model_OpenChrom	human
Roadmapepigenomics_ActiveChromatin	Adult_Liver	2_TssAFlnk	8575	142340	0.0602431	7968.66	89.6437	6.76394	1.07609	6.71428e-12	1.77123e-08	Null_Model_OpenChrom	human
Roadmapepigenomics_Histone_narrow	Stomach_Mucosa	H3K9ac	19589	142340	0.137621	18716.9	129.115	6.7542	1.04659	7.18127e-12	1.89442e-08	Null_Model_OpenChrom	human
Roadmapepigenomics_Histone_narrow	H1_Derived_Neuronal_Progenitor_Cultured_Cells	H2BK5ac	23449	142340	0.164739	22484.2	142.906	6.75136	1.04291	7.32313e-12	1.93184e-08	Null_Model_OpenChrom	human
Roadmapepigenomics_Histone_narrow	H9_Cell_Line	H3K14ac	19668	142340	0.138176	18784.8	131.046	6.73941	1.04702	7.95181e-12	2.09769e-08	Null_Model_OpenChrom	human
Roadmapepigenomics_ActiveChromatin	Esophagus	12_EnhBiv	1296	142340	0.00910496	1071.27	33.4092	6.72663	1.20978	8.68199e-12	2.29031e-08	Null_Model_OpenChrom	human
Roadmapepigenomics_Histone_narrow	NH-A_Astrocytes	H3K4me3	17949	142340	0.126099	17118.2	123.942	6.70319	1.04853	1.01958e-11	2.68964e-08	Null_Model_OpenChrom	human
Roadmapepigenomics_Histone_narrow	hESC_Derived_CD184+_Endoderm_Cultured_Cells	H3K4me3	18161	142340	0.127589	17293.9	129.673	6.68675	1.05014	1.14093e-11	3.00976e-08	Null_Model_OpenChrom	human
Roadmapepigenomics_Histone_narrow	Pancreatic_Islets	H3K27ac	11200	142340	0.0786848	10576.5	96.9353	6.43229	1.05895	6.28461e-11	1.65788e-07	Null_Model_OpenChrom	human
Roadmapepigenomics_Histone_narrow	Breast_Myoepithelial_Cells	H3K9ac	19889	142340	0.139729	19019.4	136.117	6.3884	1.04572	8.38128e-11	2.21098e-07	Null_Model_OpenChrom	human
Roadmapepigenomics_Histone_narrow	Rectal_Mucosa.Donor_29	H3K4me3	20438	142340	0.143586	19599.4	134.149	6.25102	1.04279	2.03887e-10	5.37853e-07	Null_Model_OpenChrom	human
Roadmapepigenomics_Histone_narrow	IMR90_Cell_Line	H3K9ac	20100	142340	0.141211	19300.7	128.006	6.24398	1.04141	2.13284e-10	5.62644e-07	Null_Model_OpenChrom	human
Roadmapepigenomics_Histone_narrow	Colon_Smooth_Muscle	H3K9ac	12739	142340	0.089497	12080.4	105.655	6.23337	1.05452	2.28247e-10	6.02116e-07	Null_Model_OpenChrom	human
Roadmapepigenomics_Histone_narrow	iPS-20b_Cell_Line	H3K9ac	18644	142340	0.130982	17875.6	123.423	6.22601	1.04299	2.39231e-10	6.31092e-07	Null_Model_OpenChrom	human
Roadmapepigenomics_Histone_narrow	A549_EtOH_0.02pct_Lung_Carcinoma	H3K9ac	20649	142340	0.145068	19843.8	130.136	6.18756	1.04058	3.05507e-10	8.05927e-07	Null_Model_OpenChrom	human
Roadmapepigenomics_Histone_narrow	IMR90_Cell_Line	H2AK9ac	8780	142340	0.0616833	8232.26	89.6089	6.11253	1.06654	4.9031e-10	1.29344e-06	Null_Model_OpenChrom	human
Roadmapepigenomics_Histone_narrow	H9_Cell_Line	H2BK5ac	4129	142340	0.029008	3758.68	61.32	6.03913	1.09852	7.74739e-10	2.04376e-06	Null_Model_OpenChrom	human
Roadmapepigenomics_Histone_narrow	Muscle_Satellite_Cultured_Cells	H3K4me3	18429	142340	0.129472	17673.7	126.545	5.9685	1.04273	1.19719e-09	3.15819e-06	Null_Model_OpenChrom	human
Roadmapepigenomics_Histone_narrow	Fetal_Brain_Male	H3K9me3	1734	142340	0.0121821	1500.89	39.3534	5.92352	1.15532	1.57557e-09	4.15634e-06	Null_Model_OpenChrom	human
Roadmapepigenomics_Histone_narrow	Pancreas	H3K27me3	1284	142340	0.00902065	1097.86	31.8866	5.83769	1.16955	2.6465e-09	6.98147e-06	Null_Model_OpenChrom	human
Roadmapepigenomics_ActiveChromatin	Brain_Inferior_Temporal_Lobe	2_TssAFlnk	6423	142340	0.0451244	5986.01	75.5031	5.78777	1.073	3.56644e-09	9.40828e-06	Null_Model_OpenChrom	human
Roadmapepigenomics_Histone_narrow	H1_Derived_Neuronal_Progenitor_Cultured_Cells	H3K4ac	3899	142340	0.0273922	3550.76	61.4253	5.66939	1.09808	7.16553e-09	1.89027e-05	Null_Model_OpenChrom	human
Roadmapepigenomics_Histone_narrow	NHDF-Ad_Adult_Dermal_Fibroblasts	H3K9ac	11975	142340	0.0841295	11375	106.867	5.61443	1.05275	9.86062e-09	2.60123e-05	Null_Model_OpenChrom	human
Roadmapepigenomics_Histone_narrow	H1_Cell_Line	H3K27ac	15559	142340	0.109309	14906	117.71	5.54781	1.04381	1.44631e-08	3.81538e-05	Null_Model_OpenChrom	human
Roadmapepigenomics_Histone_narrow	H9_Derived_Neuronal_Progenitor_Cultured_Cells	H3K9me3	5764	142340	0.0404946	5355.9	75.3628	5.41515	1.0762	3.06182e-08	8.07708e-05	Null_Model_OpenChrom	human
Roadmapepigenomics_Histone_narrow	HeLa-S3_Cervical_Carcinoma	H3K4me3	17195	142340	0.120802	16554	121.41	5.27929	1.03872	6.4841e-08	0.000171051	Null_Model_OpenChrom	human
Roadmapepigenomics_Histone_narrow	Sigmoid_Colon	H3K27me3	10169	142340	0.0714416	9691.82	91.224	5.23091	1.04924	8.43375e-08	0.000222482	Null_Model_OpenChrom	human
Roadmapepigenomics_ActiveChromatin	4star	2_TssAFlnk	3277	142340	0.0230223	2998.47	53.5512	5.20116	1.09289	9.90224e-08	0.000261221	Null_Model_OpenChrom	human
Roadmapepigenomics_Histone_narrow	A549_EtOH_0.02pct_Lung_Carcinoma	H3K4me3	20603	142340	0.144745	19921.5	133.207	5.11619	1.03421	1.55888e-07	0.000411232	Null_Model_OpenChrom	human
Roadmapepigenomics_Histone_narrow	Fetal_Heart	H3K4me3	13630	142340	0.0957566	13068	112.756	4.98409	1.043	3.1127e-07	0.000821131	Null_Model_OpenChrom	human
Roadmapepigenomics_ActiveChromatin	Fetal_Muscle_Leg	2_TssAFlnk	3079	142340	0.0216313	2823.72	52.4259	4.86929	1.0904	5.60003e-07	0.00147729	Null_Model_OpenChrom	human
Placental_Enhancers	Placental	Enhancer_HighConf	1378	142340	0.00968105	1208.51	35.0256	4.83902	1.14025	6.52408e-07	0.00172105	Null_Model_OpenChrom	human
Roadmapepigenomics_Histone_narrow	HSMM_Skeletal_Muscle_Myoblasts	H3K9ac	12989	142340	0.0912533	12477.9	107.84	4.73966	1.04096	1.0704e-06	0.00282371	Null_Model_OpenChrom	human
Roadmapepigenomics_ActiveChromatin	CD19_Primary_Cord_BI	2_TssAFlnk	9816	142340	0.0689616	9361.77	96.6574	4.69934	1.04852	1.30502e-06	0.00344265	Null_Model_OpenChrom	human
Roadmapepigenomics_Histone_narrow	NHEK-Epidermal_Keratinocytes	H3K4me3	19165	142340	0.134642	18577.8	127.965	4.58842	1.03161	2.23304e-06	0.00589075	Null_Model_OpenChrom	human
Roadmapepigenomics_Histone_narrow	Pancreas	H3K27ac	12745	142340	0.0895391	12240.9	110.425	4.56503	1.04118	2.49713e-06	0.00658744	Null_Model_OpenChrom	human
Roadmapepigenomics_Histone_narrow	A549_EtOH_0.02pct_Lung_Carcinoma	H3K4me2	25824	142340	0.181425	25152.6	148.728	4.51404	1.02669	3.18023e-06	0.00838945	Null_Model_OpenChrom	human
Roadmapepigenomics_ActiveChromatin	Fetal_Intestine_Small	12_EnhBiv	2164	142340	0.015203	1970.79	42.8488	4.50901	1.09803	3.25653e-06	0.00859073	Null_Model_OpenChrom	human
Roadmapepigenomics_ActiveChromatin	Fetal_Adrenal_Gland	2_TssAFlnk	5078	142340	0.0356751	4780.72	68.0392	4.36927	1.06218	6.23301e-06	0.0164427	Null_Model_OpenChrom	human
Roadmapepigenomics_ActiveChromatin	CD4+_CD25-_Th_Primary	12_EnhBiv	2343	142340	0.0164606	2143.16	45.782	4.36504	1.09325	6.35495e-06	0.0167643	Null_Model_OpenChrom	human
Roadmapepigenomics_ActiveChromatin	Brain_Inferior_Temporal_Lobe	12_EnhBiv	794	142340	0.00557819	679.663	26.1957	4.36471	1.16823	6.36444e-06	0.0167894	Null_Model_OpenChrom	human
BroadChromHMM	GM12878	WeakPromoter	5366	142340	0.0376985	5053.18	72.6029	4.30864	1.06191	8.21293e-06	0.0216657	Null_Model_OpenChrom	human
Roadmapepigenomics_Histone_narrow	Peripheral_Blood_Mononuclear_Primary_Cells	H3K27ac	9284	142340	0.0652241	8891.63	91.7788	4.27519	1.04413	9.54882e-06	0.0251898	Null_Model_OpenChrom	human
Roadmapepigenomics_Histone_narrow	Bone_Marrow_Derived_Mesenchymal_Stem_Cell_Cultured_Cells	H3K4me3	19111	142340	0.134263	18597.7	123.246	4.16454	1.0276	1.55992e-05	0.0411506	Null_Model_OpenChrom	human
Roadmapepigenomics_ActiveChromatin	CD8_Memory_Primary	12_EnhBiv	1146	142340	0.00805115	1010.51	33.0184	4.10358	1.13408	2.03402e-05	0.0536575	Null_Model_OpenChrom	human
Roadmapepigenomics_Histone_narrow	CD4+_CD25-_IL17-_PMA-Ionomycin_stimulated_MACS_purified_Th_Primary_Cells	H3K4me3	16597	142340	0.116601	16122.8	121.735	3.89569	1.02941	4.89591e-05	0.129154	Null_Model_OpenChrom	human
Roadmapepigenomics_ActiveChromatin	Colonic_Mucosa	12_EnhBiv	1279	142340	0.00898553	1146.25	35.27	3.76378	1.11581	8.36834e-05	0.220757	Null_Model_OpenChrom	human
Roadmapepigenomics_ActiveChromatin	CD4_Naive_Primary	12_EnhBiv	1122	142340	0.00788253	1003.57	31.7627	3.72873	1.11801	9.62252e-05	0.253842	Null_Model_OpenChrom	human
Roadmapepigenomics_Histone_narrow	Skeletal_Muscle_Female	H3K9ac	20442	142340	0.143614	19959.7	129.414	3.72715	1.02417	9.68269e-05	0.255429	Null_Model_OpenChrom	human
Roadmapepigenomics_ActiveChromatin	CD34	12_EnhBiv	2236	142340	0.0157089	2064.57	46.0849	3.71993	1.08304	9.96406e-05	0.262852	Null_Model_OpenChrom	human
Roadmapepigenomics_Histone_narrow	Peripheral_Blood_Mononuclear_Primary_Cells	H3K9ac	18490	142340	0.1299	18034	122.636	3.71804	1.02528	0.000100388	0.264822	Null_Model_OpenChrom	human
Roadmapepigenomics_Histone_narrow	HepG2_Hepatocellular_Carcinoma	H3K4me2	22061	142340	0.154988	21573	133.354	3.65944	1.02262	0.000126384	0.333402	Null_Model_OpenChrom	human
Roadmapepigenomics_ActiveChromatin	Fetal_Intestine_Large	12_EnhBiv	2058	142340	0.0144583	1897.49	44.3177	3.6217	1.08459	0.000146336	0.386033	Null_Model_OpenChrom	human
Roadmapepigenomics_Histone_narrow	H9_Cell_Line	H2BK12ac	3948	142340	0.0277364	3737.7	59.44	3.53795	1.05626	0.000201622	0.531878	Null_Model_OpenChrom	human
Roadmapepigenomics_Histone_narrow	H1_BMP4_Derived_Mesendoderm_Cultured_Cells	H2BK5ac	4777	142340	0.0335605	4546.41	65.2418	3.53444	1.05072	0.000204318	0.538992	Null_Model_OpenChrom	human
Roadmapepigenomics_ActiveChromatin	CD3_Primary_Peripheral_UW	2_TssAFlnk	6507	142340	0.0457145	6231.66	78.4274	3.51077	1.04418	0.000223405	0.589343	Null_Model_OpenChrom	human
Roadmapepigenomics_Histone_narrow	H9_Cell_Line	H3T11ph	6767	142340	0.0475411	6492.81	78.5942	3.48872	1.04223	0.000242673	0.640171	Null_Model_OpenChrom	human
Roadmapepigenomics_Histone_narrow	H9_Cell_Line	H2BK20ac	6923	142340	0.0486371	6645.64	79.5783	3.48542	1.04174	0.000245685	0.648117	Null_Model_OpenChrom	human
Roadmapepigenomics_ActiveChromatin	CD4_Memory_Primary	12_EnhBiv	1129	142340	0.00793171	1032.99	31.4327	3.05447	1.09294	0.00112731	1	Null_Model_OpenChrom	human
GSE62742_Histone	GM19203	H3K4ME3	14220	142340	0.0999016	13884.8	110.804	3.02521	1.02414	0.00124229	1	Null_Model_OpenChrom	human
BroadChromHMM	H1-hESC	PoisedPromoter	6010	142340	0.0422228	5785.74	76.1175	2.94618	1.03876	0.00160864	1	Null_Model_OpenChrom	human
GSE62742_Histone	GM19204	H3K4ME3	13994	142340	0.0983139	13667.4	110.912	2.94441	1.02389	0.00161784	1	Null_Model_OpenChrom	human
Roadmapepigenomics_ActiveChromatin	Duodenum_Smooth_Muscle	12_EnhBiv	1300	142340	0.00913306	1200.59	33.8642	2.93545	1.0828	0.00166534	1	Null_Model_OpenChrom	human
Roadmapepigenomics_Histone_narrow	H1_Cell_Line	H2BK5ac	11106	142340	0.0780244	10817.3	99.6304	2.89763	1.02669	0.00187995	1	Null_Model_OpenChrom	human
eQTLs	LCLs	none	2278	142340	0.0160039	2147.38	45.1582	2.89255	1.06083	0.00191066	1	Null_Model_OpenChrom	human
Roadmapepigenomics_ActiveChromatin	Fetal_Heart	12_EnhBiv	1745	142340	0.0122594	1634.72	38.9568	2.83072	1.06746	0.00232218	1	Null_Model_OpenChrom	human
GSE62742_Histone	GM18523	H3K4ME3	15182	142340	0.10666	14866.3	112.134	2.81519	1.02123	0.00243738	1	Null_Model_OpenChrom	human
Roadmapepigenomics_ActiveChromatin	Chondrocytes_from_Bone_Marrow_Derived_Mesenchymal_Stem_Cell	12_EnhBiv	1031	142340	0.00724322	947.069	30.0418	2.79381	1.08862	0.00260456	1	Null_Model_OpenChrom	human
GSE62742_Histone	GM18852	H3K4ME3	14433	142340	0.101398	14146.8	108.596	2.63564	1.02023	0.00419898	1	Null_Model_OpenChrom	human
GSE62742_Histone	GM18916	H3K4ME3	14471	142340	0.101665	14186	112.168	2.5409	1.02009	0.00552845	1	Null_Model_OpenChrom	human
Roadmapepigenomics_Histone_narrow	H1_Derived_Mesenchymal_Stem_Cells	H2BK5ac	9546	142340	0.0670648	9302.4	96.3906	2.52719	1.02619	0.00574896	1	Null_Model_OpenChrom	human
Roadmapepigenomics_ActiveChromatin	Colon_Smooth_Muscle	12_EnhBiv	758	142340	0.00532528	694.364	25.6342	2.48248	1.09165	0.00652364	1	Null_Model_OpenChrom	human
Roadmapepigenomics_Histone_narrow	H1_BMP4_Derived_Mesendoderm_Cultured_Cells	H3K23ac	6156	142340	0.0432486	5971.55	74.4387	2.47782	1.03089	0.00660943	1	Null_Model_OpenChrom	human
GSE62742_Histone	GM19147	H3K4ME3	14207	142340	0.0998103	13941.1	107.328	2.47702	1.01907	0.00662414	1	Null_Model_OpenChrom	human
Roadmapepigenomics_Histone_narrow	HUES6_Cell_Line	H3K9ac	18865	142340	0.132535	18562.2	130.026	2.32887	1.01631	0.00993287	1	Null_Model_OpenChrom	human
Roadmapepigenomics_ActiveChromatin	Aorta	ActiveChromatin	18080	142340	0.12702	17787.3	126.22	2.31873	1.01645	0.0102047	1	Null_Model_OpenChrom	human
Roadmapepigenomics_ActiveChromatin	CD34	2_TssAFlnk	8852	142340	0.0621891	8652.15	87.1811	2.29234	1.0231	0.0109429	1	Null_Model_OpenChrom	human
Roadmapepigenomics_ActiveChromatin	CD14_Primary	2_TssAFlnk	5869	142340	0.0412323	5711.39	74.1895	2.12438	1.0276	0.0168193	1	Null_Model_OpenChrom	human
Roadmapepigenomics_ActiveChromatin	CD4+_CD25-_Th_Primary	2_TssAFlnk	8836	142340	0.0620767	8654.44	86.19	2.10654	1.02098	0.0175788	1	Null_Model_OpenChrom	human
Roadmapepigenomics_Histone_narrow	H1_Derived_Neuronal_Progenitor_Cultured_Cells	H4K91ac	10968	142340	0.0770549	10766.1	98.2368	2.05543	1.01876	0.0199187	1	Null_Model_OpenChrom	human
Roadmapepigenomics_Histone_narrow	HeLa-S3_Cervical_Carcinoma	H3K9ac	15972	142340	0.11221	15748.3	116.481	1.92012	1.0142	0.0274216	1	Null_Model_OpenChrom	human
GSE62742_Histone	GM19101	H3K4ME3	13986	142340	0.0982577	13779.4	108.116	1.91115	1.015	0.0279927	1	Null_Model_OpenChrom	human
Roadmapepigenomics_ActiveChromatin	Adipose_Nuclei	12_EnhBiv	2282	142340	0.016032	2192.43	46.9989	1.90569	1.04085	0.0283451	1	Null_Model_OpenChrom	human
GSE62742_Histone	GM18517	H3K4ME3	14743	142340	0.103576	14537.7	116.645	1.76026	1.01412	0.0391821	1	Null_Model_OpenChrom	human
Roadmapepigenomics_Histone_narrow	Dnd41_TCell_Leukemia	H3K4me3	11847	142340	0.0832303	11668	102.862	1.74002	1.01534	0.0409274	1	Null_Model_OpenChrom	human
GSE62742_Histone	GM19152	H3K4ME3	14504	142340	0.101897	14315	111.67	1.69289	1.01321	0.045238	1	Null_Model_OpenChrom	human
Roadmapepigenomics_Histone_narrow	Peripheral_Blood_Mononuclear_Primary_Cells	H3K4me1	15263	142340	0.107229	15061.8	118.864	1.6926	1.01336	0.0452657	1	Null_Model_OpenChrom	human
GSE62742_Histone	GM18855	H3K4ME3	15040	142340	0.105662	14846.5	118.376	1.63456	1.01303	0.0510704	1	Null_Model_OpenChrom	human
Roadmapepigenomics_ActiveChromatin	CD4+_CD25-_CD45RA+_Naive_Primary	12_EnhBiv	1426	142340	0.0100183	1366.6	36.5967	1.62322	1.04347	0.0522709	1	Null_Model_OpenChrom	human
GSE62742_Histone	GM19160	H3K4ME3	14419	142340	0.1013	14246.2	113.446	1.52279	1.01213	0.0639052	1	Null_Model_OpenChrom	human
Roadmapepigenomics_ActiveChromatin	CD34_Primary	12_EnhBiv	1514	142340	0.0106365	1455.55	38.4495	1.52019	1.04016	0.0642318	1	Null_Model_OpenChrom	human
Roadmapepigenomics_Histone_narrow	Placenta_Amnion	H3K27ac	9889	142340	0.0694745	9757.58	97.2542	1.35127	1.01347	0.0883047	1	Null_Model_OpenChrom	human
Roadmapepigenomics_Histone_narrow	H1_Derived_Mesenchymal_Stem_Cells	H4K91ac	20688	142340	0.145342	20519.5	127.31	1.32393	1.00821	0.0927638	1	Null_Model_OpenChrom	human
Roadmapepigenomics_Histone_narrow	Brain_Germinal_Matrix	H3K27me3	13654	142340	0.0959252	13515.1	109.036	1.27372	1.01028	0.101381	1	Null_Model_OpenChrom	human
Roadmapepigenomics_Histone_narrow	Left_Ventricle	H3K27me3	7600	142340	0.0533933	7489.88	87.4043	1.25986	1.0147	0.103861	1	Null_Model_OpenChrom	human
Roadmapepigenomics_Histone_narrow	Penis_Foreskin_Fibroblast_Primary_Cells_skin01	H3K4me3	24554	142340	0.172502	24379.8	142.512	1.2222	1.00714	0.110815	1	Null_Model_OpenChrom	human
Roadmapepigenomics_ActiveChromatin	Pancreatic_Islets	ActiveChromatin	19285	142340	0.135485	19127.3	130.221	1.21088	1.00824	0.112971	1	Null_Model_OpenChrom	human
Roadmapepigenomics_Histone_narrow	CD4_Naive_Primary_Cells	H3K27ac	10940	142340	0.0768582	10828.9	98.0233	1.1329	1.01026	0.128627	1	Null_Model_OpenChrom	human
GSE62742_Histone	GM19119	H3K4ME3	14073	142340	0.0988689	13961.5	112.168	0.993703	1.00798	0.160184	1	Null_Model_OpenChrom	human
GSE62742_Histone	GM19225	H3K4ME3	14430	142340	0.101377	14334.8	115.948	0.82128	1.00664	0.205743	1	Null_Model_OpenChrom	human
Roadmapepigenomics_ActiveChromatin	Duodenum_Mucosa	12_EnhBiv	1203	142340	0.00845159	1175.37	34.3141	0.805161	1.02351	0.210363	1	Null_Model_OpenChrom	human
Roadmapepigenomics_Histone_narrow	iPS-18_Cell_Line	H3K27ac	6742	142340	0.0473655	6680.05	78.0395	0.793817	1.00927	0.213651	1	Null_Model_OpenChrom	human
GSE62742_Histone	GM18522	H3K4ME3	14750	142340	0.103625	14661.5	113.401	0.780068	1.00603	0.217675	1	Null_Model_OpenChrom	human
Roadmapepigenomics_ActiveChromatin	Brain_Cingulate_Gyrus	12_EnhBiv	892	142340	0.00626669	874	30.0777	0.598451	1.02059	0.27477	1	Null_Model_OpenChrom	human
Roadmapepigenomics_ActiveChromatin	Breast_Myoepithelial	12_EnhBiv	1863	142340	0.0130884	1839.71	40.8163	0.570697	1.01266	0.284103	1	Null_Model_OpenChrom	human
GSE62742_Histone	GM18853	H3K4ME3	14784	142340	0.103864	14719.6	115.381	0.557803	1.00437	0.28849	1	Null_Model_OpenChrom	human
Roadmapepigenomics_Histone_narrow	Dnd41_TCell_Leukemia	H3K4me2	15476	142340	0.108726	15417.1	113.334	0.519386	1.00382	0.301746	1	Null_Model_OpenChrom	human
Roadmapepigenomics_Histone_narrow	H1_Derived_Mesenchymal_Stem_Cells	H2BK120ac	15198	142340	0.106773	15140.1	113.726	0.509454	1.00383	0.305217	1	Null_Model_OpenChrom	human
GSE62742_Histone	GM18859	H3K4ME3	14870	142340	0.104468	14826.6	116.21	0.37321	1.00293	0.354496	1	Null_Model_OpenChrom	human
GSE62742_Histone	GM19140	H3K4ME3	15061	142340	0.10581	15024.5	113.977	0.31984	1.00243	0.374545	1	Null_Model_OpenChrom	human
Roadmapepigenomics_Histone_narrow	GM12878_Lymphoblastoid	H3K9me3	2161	142340	0.015182	2146.23	46.1889	0.319779	1.00688	0.374568	1	Null_Model_OpenChrom	human
Roadmapepigenomics_Histone_narrow	HepG2_Hepatocellular_Carcinoma	H3K9ac	13509	142340	0.0949066	13480.3	108.494	0.264266	1.00213	0.395788	1	Null_Model_OpenChrom	human
GSE62742_Histone	GM19172	H3K4ME3	15448	142340	0.108529	15417.3	118.361	0.259133	1.00199	0.397766	1	Null_Model_OpenChrom	human
Roadmapepigenomics_ActiveChromatin	CD8_Naive_Primary	2_TssAFlnk	5674	142340	0.0398623	5662.2	70.5051	0.167338	1.00208	0.433552	1	Null_Model_OpenChrom	human
eQTLs_GTEx_Analysis_V7	Minor_Salivary_Gland	none	1320	142340	0.00927357	1314.13	36.2473	0.161836	1.00446	0.435717	1	Null_Model_OpenChrom	human
Roadmapepigenomics_ActiveChromatin	Fetal_Lung	12_EnhBiv	2483	142340	0.0174441	2475.05	50.7471	0.1567	1.00321	0.437741	1	Null_Model_OpenChrom	human
Roadmapepigenomics_Histone_narrow	H9_Cell_Line	H4K20me1	12139	142340	0.0852817	12131.2	102.45	0.0764878	1.00065	0.469516	1	Null_Model_OpenChrom	human
Roadmapepigenomics_Histone_narrow	Esophagus	H3K27me3	5658	142340	0.0397499	5655.93	70.412	0.0294258	1.00037	0.488263	1	Null_Model_OpenChrom	human
GSE62742_Histone	GM18913	H3K4ME3	14704	142340	0.103302	14703.5	114.312	0.00428222	1.00003	0.498292	1	Null_Model_OpenChrom	human
Roadmapepigenomics_ActiveChromatin	Fetal_Heart	11_BivFlnk	266	142340	0.00186876	243.163	15.3529	0	1.09392	0.5	1	Null_Model_OpenChrom	human
Roadmapepigenomics_ActiveChromatin	Fetal_Intestine_Small	3_TxFlnk	687	142340	0.00482647	1094.29	35.3146	0	0.627802	0.5	1	Null_Model_OpenChrom	human
FANTOM5_enhancer_organ	lymph_node_expressed_enhancers	Enhancer	38	142340	0.000266966	55.3576	7.26608	0	0.686445	0.5	1	Null_Model_OpenChrom	human
Roadmapepigenomics_ActiveChromatin	CD4_Memory_Primary	11_BivFlnk	454	142340	0.00318955	326.465	18.6485	0	1.39066	0.5	1	Null_Model_OpenChrom	human
Roadmapepigenomics_ActiveChromatin	CD4+_CD25int_CD127+_Tmem_Primary	6_EnhG	490	142340	0.00344246	800.916	31.1496	0	0.611799	0.5	1	Null_Model_OpenChrom	human
Roadmapepigenomics_ActiveChromatin	CD4+_CD25-_Th_Primary	3_TxFlnk	129	142340	0.000906281	250.06	16.9954	0	0.515876	0.5	1	Null_Model_OpenChrom	human
FANTOM5_enhancer_organ	placenta_expressed_enhancers	Enhancer	92	142340	0.00064634	130.168	11.4075	0	0.70678	0.5	1	Null_Model_OpenChrom	human
Roadmapepigenomics_ActiveChromatin	Fetal_Heart	3_TxFlnk	19	142340	0.000133483	66.2807	8.35836	0	0.28666	0.5	1	Null_Model_OpenChrom	human
FANTOM5_enhancer_organ	olfactory_region_expressed_enhancers	Enhancer	80	142340	0.000562035	59.1858	8.09144	0	1.35168	0.5	1	Null_Model_OpenChrom	human
Roadmapepigenomics_ActiveChromatin	Fetal_Heart	6_EnhG	313	142340	0.00219896	554.23	24.1538	0	0.564748	0.5	1	Null_Model_OpenChrom	human
Roadmapepigenomics_ActiveChromatin	Fetal_Intestine_Large	3_TxFlnk	171	142340	0.00120135	320.731	19.3891	0	0.533157	0.5	1	Null_Model_OpenChrom	human
FANTOM5_enhancer_organ	penis_expressed_enhancers	Enhancer	25	142340	0.000175636	27.3087	4.97389	0	0.915459	0.5	1	Null_Model_OpenChrom	human
FANTOM5_enhancer_organ	pancreas_expressed_enhancers	Enhancer	39	142340	0.000273992	42.5405	6.59626	0	0.916774	0.5	1	Null_Model_OpenChrom	human
FANTOM5_enhancer_organ	parotid_gland_expressed_enhancers	Enhancer	32	142340	0.000224814	30.7722	5.64518	0	1.0399	0.5	1	Null_Model_OpenChrom	human
Roadmapepigenomics_ActiveChromatin	CD4_Memory_Primary	10_TssBiv	236	142340	0.001658	110.242	11.054	0	2.14075	0.5	1	Null_Model_OpenChrom	human
FANTOM5_enhancer_organ	lung_expressed_enhancers	Enhancer	304	142340	0.00213573	435.351	21.0527	0	0.698288	0.5	1	Null_Model_OpenChrom	human
Roadmapepigenomics_ActiveChromatin	CD4+_CD25-_Th_Primary	10_TssBiv	566	142340	0.00397639	253.301	18.4885	0	2.2345	0.5	1	Null_Model_OpenChrom	human
FANTOM5_enhancer_organ	meninx_expressed_enhancers	Enhancer	229	142340	0.00160882	276.716	16.156	0	0.827562	0.5	1	Null_Model_OpenChrom	human
Roadmapepigenomics_ActiveChromatin	Esophagus	3_TxFlnk	172	142340	0.00120837	250.892	15.4368	0	0.685554	0.5	1	Null_Model_OpenChrom	human
Roadmapepigenomics_ActiveChromatin	CD4+_CD25int_CD127+_Tmem_Primary	3_TxFlnk	124	142340	0.000871154	208.436	15.2116	0	0.594908	0.5	1	Null_Model_OpenChrom	human
FANTOM5_enhancer_cell	skeletal_muscle_cell	Enhancer	429	142340	0.00301391	479.586	21.9746	0	0.894521	0.5	1	Null_Model_OpenChrom	human
FANTOM5_enhancer_cell	skin_fibroblast	Enhancer	588	142340	0.00413095	727.522	25.7839	0	0.808222	0.5	1	Null_Model_OpenChrom	human
FANTOM5_enhancer_cell	smooth_muscle_cell_of_prostate	Enhancer	245	142340	0.00172123	249.881	15.3738	0	0.980466	0.5	1	Null_Model_OpenChrom	human
FANTOM5_enhancer_cell	smooth_muscle_cell_of_the_esophagus	Enhancer	71	142340	0.000498806	77.7582	8.83003	0	0.913086	0.5	1	Null_Model_OpenChrom	human
FANTOM5_enhancer_cell	smooth_muscle_cell_of_trachea	Enhancer	74	142340	0.000519882	68.8012	8.2169	0	1.07556	0.5	1	Null_Model_OpenChrom	human
FANTOM5_enhancer_cell	stromal_cell	Enhancer	539	142340	0.00378671	630.975	25.8552	0	0.854233	0.5	1	Null_Model_OpenChrom	human
FANTOM5_enhancer_cell	T_cell	Enhancer	487	142340	0.00342139	822.513	30.0839	0	0.592088	0.5	1	Null_Model_OpenChrom	human
FANTOM5_enhancer_cell	tendon_cell	Enhancer	174	142340	0.00122243	190.974	13.6842	0	0.911119	0.5	1	Null_Model_OpenChrom	human
FANTOM5_enhancer_cell	trabecular_meshwork_cell	Enhancer	182	142340	0.00127863	169.448	13.413	0	1.07408	0.5	1	Null_Model_OpenChrom	human
FANTOM5_enhancer_cell	urothelial_cell	Enhancer	210	142340	0.00147534	250.87	15.1674	0	0.837087	0.5	1	Null_Model_OpenChrom	human
FANTOM5_enhancer_cell	uterine_smooth_muscle_cell	Enhancer	136	142340	0.000955459	151.34	12.2356	0	0.898641	0.5	1	Null_Model_OpenChrom	human
FANTOM5_enhancer_organ	adipose_tissue_expressed_enhancers	Enhancer	184	142340	0.00129268	225.548	15.2845	0	0.815789	0.5	1	Null_Model_OpenChrom	human
FANTOM5_enhancer_organ	blood_expressed_enhancers	Enhancer	345	142340	0.00242377	611.951	25.2578	0	0.563771	0.5	1	Null_Model_OpenChrom	human
FANTOM5_enhancer_organ	blood_vessel_expressed_enhancers	Enhancer	161	142340	0.00113109	196.084	14.4226	0	0.821077	0.5	1	Null_Model_OpenChrom	human
FANTOM5_enhancer_organ	brain_expressed_enhancers	Enhancer	647	142340	0.00454545	700.58	26.3802	0	0.92352	0.5	1	Null_Model_OpenChrom	human
FANTOM5_enhancer_organ	esophagus_expressed_enhancers	Enhancer	141	142340	0.000990586	160.659	13.0271	0	0.877633	0.5	1	Null_Model_OpenChrom	human
FANTOM5_enhancer_organ	eye_expressed_enhancers	Enhancer	195	142340	0.00136996	193.329	14.2559	0	1.00865	0.5	1	Null_Model_OpenChrom	human
FANTOM5_enhancer_organ	female_gonad_expressed_enhancers	Enhancer	163	142340	0.00114515	145.244	11.7313	0	1.12225	0.5	1	Null_Model_OpenChrom	human
FANTOM5_enhancer_organ	gallbladder_expressed_enhancers	Enhancer	123	142340	0.000864128	135.123	11.4548	0	0.910283	0.5	1	Null_Model_OpenChrom	human
Roadmapepigenomics_ActiveChromatin	Fetal_Muscle_Leg	3_TxFlnk	188	142340	0.00132078	343.087	18.8009	0	0.547966	0.5	1	Null_Model_OpenChrom	human
Roadmapepigenomics_ActiveChromatin	CD4+_CD25-_CD45RO+_Memory_Primary	3_TxFlnk	63	142340	0.000442602	143.945	12.2857	0	0.437667	0.5	1	Null_Model_OpenChrom	human
Roadmapepigenomics_ActiveChromatin	CD4+_CD25-_CD45RO+_Memory_Primary	6_EnhG	484	142340	0.00340031	783.922	29.8401	0	0.617408	0.5	1	Null_Model_OpenChrom	human
FANTOM5_enhancer_organ	heart_expressed_enhancers	Enhancer	222	142340	0.00155965	283.041	16.5263	0	0.784339	0.5	1	Null_Model_OpenChrom	human
Roadmapepigenomics_ActiveChromatin	CD4+_CD25-_IL17+_PMA-Ionomcyin_stimulated_Th17_Primary	10_TssBiv	565	142340	0.00396937	250.277	17.9959	0	2.2575	0.5	1	Null_Model_OpenChrom	human
FANTOM5_enhancer_organ	internal_male_genitalia_expressed_enhancers	Enhancer	134	142340	0.000941408	148.317	12.3164	0	0.903472	0.5	1	Null_Model_OpenChrom	human
FANTOM5_enhancer_organ	kidney_expressed_enhancers	Enhancer	251	142340	0.00176338	250.041	15.738	0	1.00384	0.5	1	Null_Model_OpenChrom	human
Roadmapepigenomics_ActiveChromatin	Fetal_Lung	3_TxFlnk	218	142340	0.00153154	358.467	19.2338	0	0.608146	0.5	1	Null_Model_OpenChrom	human
FANTOM5_enhancer_organ	large_intestine_expressed_enhancers	Enhancer	190	142340	0.00133483	232.525	15.3954	0	0.817115	0.5	1	Null_Model_OpenChrom	human
Roadmapepigenomics_ActiveChromatin	CD4+_CD25-_IL17-_PMA-Ionomycin_stimulated_MACS_purified_Th_Primary	3_TxFlnk	430	142340	0.00302094	980.79	36.0004	0	0.438422	0.5	1	Null_Model_OpenChrom	human
FANTOM5_enhancer_organ	liver_expressed_enhancers	Enhancer	93	142340	0.000653365	152.119	12.7774	0	0.611364	0.5	1	Null_Model_OpenChrom	human
Roadmapepigenomics_ActiveChromatin	Fetal_Heart	10_TssBiv	184	142340	0.00129268	115.094	10.8096	0	1.59869	0.5	1	Null_Model_OpenChrom	human
Roadmapepigenomics_ActiveChromatin	CD4_Naive_Primary	10_TssBiv	364	142340	0.00255726	185.204	14.8266	0	1.9654	0.5	1	Null_Model_OpenChrom	human
Roadmapepigenomics_ActiveChromatin	Fetal_Brain_Male	3_TxFlnk	16	142340	0.000112407	53.7403	7.34333	0	0.297728	0.5	1	Null_Model_OpenChrom	human
FANTOM5_enhancer_cell	sensory_epithelial_cell	Enhancer	303	142340	0.00212871	406.175	20.6296	0	0.745984	0.5	1	Null_Model_OpenChrom	human
Roadmapepigenomics_ActiveChromatin	Duodenum_Mucosa	3_TxFlnk	210	142340	0.00147534	446.547	22.2298	0	0.470275	0.5	1	Null_Model_OpenChrom	human
FANTOM5_enhancer_organ	vagina_expressed_enhancers	Enhancer	104	142340	0.000730645	102.599	9.78174	0	1.01365	0.5	1	Null_Model_OpenChrom	human
FANTOM5_enhancer_organ	spinal_cord_expressed_enhancers	Enhancer	177	142340	0.0012435	192.317	14.1552	0	0.920357	0.5	1	Null_Model_OpenChrom	human
FANTOM5_enhancer_organ	uterus_expressed_enhancers	Enhancer	162	142340	0.00113812	171.726	13.2456	0	0.943362	0.5	1	Null_Model_OpenChrom	human
Roadmapepigenomics_ActiveChromatin	Duodenum_Smooth_Muscle	3_TxFlnk	261	142340	0.00183364	402.098	20.5966	0	0.649096	0.5	1	Null_Model_OpenChrom	human
FANTOM5_enhancer_organ	spleen_expressed_enhancers	Enhancer	311	142340	0.00218491	456.502	21.1949	0	0.681267	0.5	1	Null_Model_OpenChrom	human
Roadmapepigenomics_ActiveChromatin	Duodenum_Smooth_Muscle	6_EnhG	682	142340	0.00479134	1246.48	39.5739	0	0.547142	0.5	1	Null_Model_OpenChrom	human
FANTOM5_enhancer_organ	urinary_bladder_expressed_enhancers	Enhancer	104	142340	0.000730645	124.892	10.851	0	0.832719	0.5	1	Null_Model_OpenChrom	human
FANTOM5_enhancer_organ	stomach_expressed_enhancers	Enhancer	18	142340	0.000126458	18.2428	4.28136	0	0.986693	0.5	1	Null_Model_OpenChrom	human
Roadmapepigenomics_ActiveChromatin	ES-I3	11_BivFlnk	602	142340	0.00422931	877.486	30.7286	0	0.686051	0.5	1	Null_Model_OpenChrom	human
FANTOM5_enhancer_organ	umbilical_cord_expressed_enhancers	Enhancer	18	142340	0.000126458	17.6424	4.08068	0	1.02027	0.5	1	Null_Model_OpenChrom	human
FANTOM5_enhancer_organ	submandibular_gland_expressed_enhancers	Enhancer	27	142340	0.000189687	29.979	5.62499	0	0.90063	0.5	1	Null_Model_OpenChrom	human
Roadmapepigenomics_ActiveChromatin	ES-WA7	6_EnhG	11	142340	7.72798e-05	9.5984	3.14906	0	1.14602	0.5	1	Null_Model_OpenChrom	human
Roadmapepigenomics_ActiveChromatin	ES-WA7	3_TxFlnk	1	142340	7.02543e-06	0.52048	0.734731	0	1.92131	0.5	1	Null_Model_OpenChrom	human
Roadmapepigenomics_ActiveChromatin	ES-WA7	2_TssAFlnk	361	142340	0.00253618	277.447	17.163	0	1.30115	0.5	1	Null_Model_OpenChrom	human
FANTOM5_enhancer_organ	testis_expressed_enhancers	Enhancer	246	142340	0.00172826	209.029	14.6561	0	1.17687	0.5	1	Null_Model_OpenChrom	human
Roadmapepigenomics_ActiveChromatin	ES-I3	3_TxFlnk	91	142340	0.000639314	216.174	14.8457	0	0.420958	0.5	1	Null_Model_OpenChrom	human
Roadmapepigenomics_ActiveChromatin	ES-WA7	11_BivFlnk	209	142340	0.00146832	176.561	13.4077	0	1.18372	0.5	1	Null_Model_OpenChrom	human
FANTOM5_enhancer_organ	throat_expressed_enhancers	Enhancer	121	142340	0.000850077	143.599	12.1451	0	0.842622	0.5	1	Null_Model_OpenChrom	human
Roadmapepigenomics_ActiveChromatin	ES-I3	6_EnhG	362	142340	0.00254321	536.511	23.8814	0	0.674729	0.5	1	Null_Model_OpenChrom	human
FANTOM5_enhancer_organ	tonsil_expressed_enhancers	Enhancer	156	142340	0.00109597	230.275	15.7093	0	0.677452	0.5	1	Null_Model_OpenChrom	human
FANTOM5_enhancer_organ	tongue_expressed_enhancers	Enhancer	117	142340	0.000821976	133.089	12.023	0	0.879112	0.5	1	Null_Model_OpenChrom	human
FANTOM5_enhancer_organ	thyroid_gland_expressed_enhancers	Enhancer	149	142340	0.00104679	144.562	12.0083	0	1.0307	0.5	1	Null_Model_OpenChrom	human
FANTOM5_enhancer_organ	thymus_expressed_enhancers	Enhancer	265	142340	0.00186174	325.845	18.2691	0	0.81327	0.5	1	Null_Model_OpenChrom	human
Roadmapepigenomics_ActiveChromatin	Dnd41_TCell_Leukemia	12_EnhBiv	649	142340	0.00455951	508.93	22.8201	0	1.27522	0.5	1	Null_Model_OpenChrom	human
Roadmapepigenomics_ActiveChromatin	Dnd41_TCell_Leukemia	10_TssBiv	267	142340	0.00187579	119.362	11.4395	0	2.2369	0.5	1	Null_Model_OpenChrom	human
Roadmapepigenomics_ActiveChromatin	Colon_Smooth_Muscle	3_TxFlnk	133	142340	0.000934382	227.605	14.6948	0	0.584345	0.5	1	Null_Model_OpenChrom	human
Roadmapepigenomics_ActiveChromatin	Fetal_Adrenal_Gland	3_TxFlnk	192	142340	0.00134888	348.056	19.3762	0	0.551635	0.5	1	Null_Model_OpenChrom	human
FANTOM5_enhancer_organ	prostate_gland_expressed_enhancers	Enhancer	144	142340	0.00101166	137.187	11.1001	0	1.04966	0.5	1	Null_Model_OpenChrom	human
FANTOM5_enhancer_organ	salivary_gland_expressed_enhancers	Enhancer	62	142340	0.000435577	68.5195	8.08405	0	0.904852	0.5	1	Null_Model_OpenChrom	human
FANTOM5_enhancer_organ	skeletal_muscle_tissue_expressed_enhancers	Enhancer	121	142340	0.000850077	131.485	11.441	0	0.92026	0.5	1	Null_Model_OpenChrom	human
Roadmapepigenomics_ActiveChromatin	Fetal_Brain_Male	10_TssBiv	369	142340	0.00259238	408.658	19.9958	0	0.902955	0.5	1	Null_Model_OpenChrom	human
Roadmapepigenomics_ActiveChromatin	CD4_Memory_Primary	3_TxFlnk	60	142340	0.000421526	136.069	12.0042	0	0.440953	0.5	1	Null_Model_OpenChrom	human
Roadmapepigenomics_ActiveChromatin	CD4_Memory_Primary	6_EnhG	579	142340	0.00406773	941.285	32.6105	0	0.615117	0.5	1	Null_Model_OpenChrom	human
Roadmapepigenomics_ActiveChromatin	Fetal_Brain_Female	6_EnhG	523	142340	0.0036743	936.413	32.4102	0	0.558514	0.5	1	Null_Model_OpenChrom	human
Roadmapepigenomics_ActiveChromatin	Fetal_Brain_Female	3_TxFlnk	144	142340	0.00101166	358.682	20.5291	0	0.401469	0.5	1	Null_Model_OpenChrom	human
Roadmapepigenomics_ActiveChromatin	CD4_Naive_Primary	11_BivFlnk	607	142340	0.00426444	406.039	20.8375	0	1.49493	0.5	1	Null_Model_OpenChrom	human
Roadmapepigenomics_ActiveChromatin	CD4_Naive_Primary	3_TxFlnk	134	142340	0.000941408	250.955	16.4793	0	0.53396	0.5	1	Null_Model_OpenChrom	human
Roadmapepigenomics_ActiveChromatin	CD56_Primary	10_TssBiv	314	142340	0.00220599	146.232	12.9543	0	2.14728	0.5	1	Null_Model_OpenChrom	human
FANTOM5_enhancer_organ	skin_of_body_expressed_enhancers	Enhancer	34	142340	0.000238865	31.5385	5.55111	0	1.07805	0.5	1	Null_Model_OpenChrom	human
Roadmapepigenomics_ActiveChromatin	Fetal_Brain_Male	6_EnhG	107	142340	0.000751721	197.128	14.7754	0	0.542795	0.5	1	Null_Model_OpenChrom	human
Roadmapepigenomics_ActiveChromatin	CD56_Primary	3_TxFlnk	143	142340	0.00100464	273.061	16.7331	0	0.523693	0.5	1	Null_Model_OpenChrom	human
Roadmapepigenomics_ActiveChromatin	CD8_Memory_Primary	10_TssBiv	430	142340	0.00302094	216.556	16.2135	0	1.98563	0.5	1	Null_Model_OpenChrom	human
FANTOM5_enhancer_organ	small_intestine_expressed_enhancers	Enhancer	143	142340	0.00100464	153.461	12.8286	0	0.931836	0.5	1	Null_Model_OpenChrom	human
Roadmapepigenomics_ActiveChromatin	CD8_Memory_Primary	11_BivFlnk	524	142340	0.00368133	361.085	19.3351	0	1.45118	0.5	1	Null_Model_OpenChrom	human
Roadmapepigenomics_ActiveChromatin	CD8_Memory_Primary	3_TxFlnk	100	142340	0.000702543	197.775	15.0566	0	0.505625	0.5	1	Null_Model_OpenChrom	human
Roadmapepigenomics_ActiveChromatin	CD8_Memory_Primary	6_EnhG	546	142340	0.00383589	871.194	31.0694	0	0.626726	0.5	1	Null_Model_OpenChrom	human
Roadmapepigenomics_ActiveChromatin	CD8_Naive_Primary	10_TssBiv	479	142340	0.00336518	231.864	17.2985	0	2.06586	0.5	1	Null_Model_OpenChrom	human
Roadmapepigenomics_ActiveChromatin	CD8_Naive_Primary	3_TxFlnk	63	142340	0.000442602	101.081	10.2537	0	0.623263	0.5	1	Null_Model_OpenChrom	human
FANTOM5_enhancer_organ	smooth_muscle_tissue_expressed_enhancers	Enhancer	45	142340	0.000316144	51.2488	7.02133	0	0.87807	0.5	1	Null_Model_OpenChrom	human
Roadmapepigenomics_ActiveChromatin	CD8_Naive_Primary	6_EnhG	536	142340	0.00376563	846.685	30.4257	0	0.633057	0.5	1	Null_Model_OpenChrom	human
Roadmapepigenomics_ActiveChromatin	Chondrocytes_from_Bone_Marrow_Derived_Mesenchymal_Stem_Cell	3_TxFlnk	228	142340	0.0016018	534.069	24.7346	0	0.426911	0.5	1	Null_Model_OpenChrom	human
Roadmapepigenomics_ActiveChromatin	Colonic_Mucosa	3_TxFlnk	256	142340	0.00179851	309.055	17.0895	0	0.828332	0.5	1	Null_Model_OpenChrom	human
Roadmapepigenomics_ActiveChromatin	Colonic_Mucosa	6_EnhG	653	142340	0.00458761	1057.8	35.3951	0	0.617317	0.5	1	Null_Model_OpenChrom	human
Roadmapepigenomics_ActiveChromatin	Fetal_Brain_Female	12_EnhBiv	677	142340	0.00475622	908.048	30.9173	0	0.745555	0.5	1	Null_Model_OpenChrom	human
FANTOM5_enhancer_cell	retinal_pigment_epithelial_cell	Enhancer	200	142340	0.00140509	207.725	14.5003	0	0.96281	0.5	1	Null_Model_OpenChrom	human
FANTOM5_enhancer_cell	fibroblast_of_choroid_plexus	Enhancer	199	142340	0.00139806	202.235	14.284	0	0.984005	0.5	1	Null_Model_OpenChrom	human
FANTOM5_enhancer_cell	respiratory_epithelial_cell	Enhancer	520	142340	0.00365322	658.75	25.6064	0	0.789374	0.5	1	Null_Model_OpenChrom	human
Roadmapepigenomics_Histone_narrow	Right_Atrium	H3K27me3	557	142340	0.00391317	604.657	24.875	0	0.921183	0.5	1	Null_Model_OpenChrom	human
CancerEnD	CESC	none	392	142340	0.00275397	525.715	23.0992	0	0.745651	0.5	1	Null_Model_OpenChrom	human
CancerEnD	BRCA	none	370	142340	0.00259941	497.542	22.92	0	0.743655	0.5	1	Null_Model_OpenChrom	human
CancerEnD	BLCA	none	351	142340	0.00246593	497.794	23.4064	0	0.705111	0.5	1	Null_Model_OpenChrom	human
SNP_sets	Any	Allergy	4	142340	2.81017e-05	3.9041	1.97352	0	1.02456	0.5	1	Null_Model_OpenChrom	human
SNP_sets	Any	Alopecia_areata	3	142340	2.10763e-05	1.51548	1.26254	0	1.97956	0.5	1	Null_Model_OpenChrom	human
CancerEnD	ESCA	none	272	142340	0.00191092	375.159	19.7798	0	0.725026	0.5	1	Null_Model_OpenChrom	human
SNP_sets	Any	Alzheimers_combined	5	142340	3.51272e-05	3.24276	1.83739	0	1.5419	0.5	1	Null_Model_OpenChrom	human
SNP_sets	Any	Asthma	4	142340	2.81017e-05	2.25874	1.53492	0	1.7709	0.5	1	Null_Model_OpenChrom	human
SNP_sets	Any	Atopic_dermatitis	0	142340	0	2.71528	1.65827	0	0	0.5	1	Null_Model_OpenChrom	human
SNP_sets	Any	Autoimmune_thyroiditis	0	142340	0	1.60839	1.28238	0	0	0.5	1	Null_Model_OpenChrom	human
SNP_sets	Any	Behcets_disease	1	142340	7.02543e-06	0.899101	0.943827	0	1.11222	0.5	1	Null_Model_OpenChrom	human
SNP_sets	Any	Bone_mineral_density	5	142340	3.51272e-05	8.01199	2.87226	0	0.624065	0.5	1	Null_Model_OpenChrom	human
SNP_sets	Any	Celiac_disease	5	142340	3.51272e-05	10.2937	3.23197	0	0.485734	0.5	1	Null_Model_OpenChrom	human
SNP_sets	Any	Ankylosing_spondylitis	1	142340	7.02543e-06	4.995	2.28363	0	0.2002	0.5	1	Null_Model_OpenChrom	human
SNP_sets	Any	Chronic_kidney_disease	6	142340	4.21526e-05	4.81019	2.15961	0	1.24735	0.5	1	Null_Model_OpenChrom	human
CancerEnD	GBM	none	496	142340	0.00348461	683.375	26.3724	0	0.72581	0.5	1	Null_Model_OpenChrom	human
CancerEnD	KIRC	none	437	142340	0.00307011	618.013	25.5044	0	0.707105	0.5	1	Null_Model_OpenChrom	human
EBV_Enhancers	LCLs	none	101	142340	0.000709569	151.746	12.1135	0	0.665585	0.5	1	Null_Model_OpenChrom	human
EBV_Enhancers	LCLs	EnhancersT2	282	142340	0.00198117	444.022	21.6789	0	0.635104	0.5	1	Null_Model_OpenChrom	human
EBV_Enhancers	LCLs_allmaxscore	none	216	142340	0.00151749	347.422	19.2555	0	0.621723	0.5	1	Null_Model_OpenChrom	human
CancerEnD	UCEC	none	405	142340	0.0028453	578.411	24.9604	0	0.700195	0.5	1	Null_Model_OpenChrom	human
CancerEnD	THCA	none	286	142340	0.00200927	378.979	19.563	0	0.754659	0.5	1	Null_Model_OpenChrom	human
CancerEnD	STAD	none	330	142340	0.00231839	454.855	21.1943	0	0.725506	0.5	1	Null_Model_OpenChrom	human
CancerEnD	HNSC	none	320	142340	0.00224814	442.014	21.3754	0	0.723959	0.5	1	Null_Model_OpenChrom	human
CancerEnD	SKCM	none	232	142340	0.0016299	317.807	18.3328	0	0.730002	0.5	1	Null_Model_OpenChrom	human
CancerEnD	PRAD	none	274	142340	0.00192497	355.777	17.9637	0	0.770145	0.5	1	Null_Model_OpenChrom	human
CancerEnD	PAAD	none	198	142340	0.00139104	263.573	16.4066	0	0.751214	0.5	1	Null_Model_OpenChrom	human
CancerEnD	LUSC	none	495	142340	0.00347759	679.175	26.7787	0	0.728826	0.5	1	Null_Model_OpenChrom	human
CancerEnD	LUAD	none	412	142340	0.00289448	562.939	24.0728	0	0.731873	0.5	1	Null_Model_OpenChrom	human
CancerEnD	LIHC	none	405	142340	0.0028453	510.765	23.1525	0	0.792928	0.5	1	Null_Model_OpenChrom	human
CancerEnD	KIRP	none	393	142340	0.00276099	527.567	23.3856	0	0.744928	0.5	1	Null_Model_OpenChrom	human
CancerEnD	SARC	none	312	142340	0.00219193	410.921	20.3011	0	0.75927	0.5	1	Null_Model_OpenChrom	human
SNP_sets	Any	C_reactive_protein	3	142340	2.10763e-05	2.78721	1.67322	0	1.07634	0.5	1	Null_Model_OpenChrom	human
SNP_sets	Any	Creatinine_levels	1	142340	7.02543e-06	1.5974	1.28637	0	0.626016	0.5	1	Null_Model_OpenChrom	human
SNP_sets	Any	Crohns_disease	11	142340	7.72798e-05	16.982	4.18732	0	0.647744	0.5	1	Null_Model_OpenChrom	human
SNP_sets	Any	Triglycerides	2	142340	1.40509e-05	4.83317	2.29981	0	0.413807	0.5	1	Null_Model_OpenChrom	human
SNP_sets	Any	Type_1_diabetes	4	142340	2.81017e-05	6.49351	2.55464	0	0.616	0.5	1	Null_Model_OpenChrom	human
SNP_sets	Any	Type_2_diabetes	4	142340	2.81017e-05	9.34865	2.9586	0	0.427869	0.5	1	Null_Model_OpenChrom	human
SNP_sets	Any	Ulcerative_colitis	5	142340	3.51272e-05	11.7542	3.57792	0	0.425378	0.5	1	Null_Model_OpenChrom	human
SNP_sets	Any	Urate_levels	3	142340	2.10763e-05	5.31169	2.2576	0	0.564792	0.5	1	Null_Model_OpenChrom	human
SNP_sets	Any	Vitiligo	3	142340	2.10763e-05	2.68531	1.61365	0	1.11719	0.5	1	Null_Model_OpenChrom	human
SNP_sets	Any	Systemic_sclerosis	0	142340	0	1.08292	1.04696	0	0	0.5	1	Null_Model_OpenChrom	human
SuperEnhancers_Hnisz2013	BI_CD34_Primary_RO01480	SuperEnhancer	648	142340	0.00455248	1162.69	38.431	0	0.55733	0.5	1	Null_Model_OpenChrom	human
SuperEnhancers_Hnisz2013	CD34_adult	SuperEnhancer	255	142340	0.00179149	467.584	22.8345	0	0.545356	0.5	1	Null_Model_OpenChrom	human
SuperEnhancers_Hnisz2013	CD34_fetal	SuperEnhancer	102	142340	0.000716594	224.05	15.6028	0	0.455256	0.5	1	Null_Model_OpenChrom	human
SuperEnhancers_Hnisz2013	H1	SuperEnhancer	666	142340	0.00467894	1029.97	33.7234	0	0.646624	0.5	1	Null_Model_OpenChrom	human
SuperEnhancers_Hnisz2013	HepG2	SuperEnhancer	573	142340	0.00402557	924.06	32.9992	0	0.62009	0.5	1	Null_Model_OpenChrom	human
SuperEnhancers_Hnisz2013	MCF-7	SuperEnhancer	312	142340	0.00219193	517.673	23.7594	0	0.602697	0.5	1	Null_Model_OpenChrom	human
SuperEnhancers_Hnisz2013	UCSD_Adipose_Tissue	SuperEnhancer	76	142340	0.000533933	126.302	11.5045	0	0.601734	0.5	1	Null_Model_OpenChrom	human
SuperEnhancers_Hnisz2013	BI_CD34_Primary_RO01549	SuperEnhancer	548	142340	0.00384994	1038.56	35.3928	0	0.527653	0.5	1	Null_Model_OpenChrom	human
SNP_sets	Any	Systemic_lupus_erythematosus	2	142340	1.40509e-05	5.53147	2.43665	0	0.361568	0.5	1	Null_Model_OpenChrom	human
SNP_sets	Any	Rheumatoid_arthritis	1	142340	7.02543e-06	4.33167	2.08324	0	0.230858	0.5	1	Null_Model_OpenChrom	human
SNP_sets	Any	Restless_legs_syndrome	0	142340	0	0.495504	0.708682	0	0	0.5	1	Null_Model_OpenChrom	human
SNP_sets	Any	Fasting_glucose_related_traits	2	142340	1.40509e-05	2.6014	1.63584	0	0.768817	0.5	1	Null_Model_OpenChrom	human
SNP_sets	Any	HDL_cholesterol	7	142340	4.9178e-05	7.90709	2.74961	0	0.885281	0.5	1	Null_Model_OpenChrom	human
SNP_sets	Any	Juvenile_idiopathic_arthritis	4	142340	2.81017e-05	5.43656	2.34653	0	0.735759	0.5	1	Null_Model_OpenChrom	human
SNP_sets	Any	Kawasaki_disease	1	142340	7.02543e-06	1.37762	1.14772	0	0.725888	0.5	1	Null_Model_OpenChrom	human
SNP_sets	Any	LDL_cholesterol	6	142340	4.21526e-05	4.7023	2.15668	0	1.27597	0.5	1	Null_Model_OpenChrom	human
SNP_sets	Any	Liver_enzyme_levels_gamma_glutamyl_transferase	5	142340	3.51272e-05	4.3007	2.15511	0	1.1626	0.5	1	Null_Model_OpenChrom	human
SNP_sets	Any	Migraine	1	142340	7.02543e-06	2.11189	1.46611	0	0.47351	0.5	1	Null_Model_OpenChrom	human
SNP_sets	Any	Multiple_sclerosis	10	142340	7.02543e-05	17.3467	4.14593	0	0.57648	0.5	1	Null_Model_OpenChrom	human
SNP_sets	Any	Platelet_counts	6	142340	4.21526e-05	10.4226	3.15313	0	0.575673	0.5	1	Null_Model_OpenChrom	human
SNP_sets	Any	Primary_biliary_cirrhosis	7	142340	4.9178e-05	7.59141	2.74916	0	0.922095	0.5	1	Null_Model_OpenChrom	human
SNP_sets	Any	Primary_sclerosing_cholangitis	0	142340	0	1.97802	1.35629	0	0	0.5	1	Null_Model_OpenChrom	human
SNP_sets	Any	Progressive_supranuclear_palsy	0	142340	0	1.36663	1.19601	0	0	0.5	1	Null_Model_OpenChrom	human
SNP_sets	Any	Psoriasis	4	142340	2.81017e-05	6.72028	2.68546	0	0.595213	0.5	1	Null_Model_OpenChrom	human
SNP_sets	Any	Red_blood_cell_traits	3	142340	2.10763e-05	7.27073	2.58334	0	0.412613	0.5	1	Null_Model_OpenChrom	human
SNP_sets	Any	Renal_function_related_traits_BUN	2	142340	1.40509e-05	2.48352	1.51459	0	0.80531	0.5	1	Null_Model_OpenChrom	human
EBV_Enhancers	LCLs	SuperEnhancersAll	216	142340	0.00151749	347.205	19.016	0	0.622111	0.5	1	Null_Model_OpenChrom	human
EBV_Enhancers	LCLs	SuperEnhancers	101	142340	0.000709569	152.057	12.2087	0	0.664225	0.5	1	Null_Model_OpenChrom	human
EBV_Enhancers	LCLs_Tier2	none	282	142340	0.00198117	445.048	21.0369	0	0.63364	0.5	1	Null_Model_OpenChrom	human
EnhancerFinder_Enhancers	Limb	none	515	142340	0.0036181	2368.39	76.2643	0	0.217448	0.5	1	Null_Model_OpenChrom	human
FANTOM5_enhancer_cell	iris_pigment_epithelial_cell	Enhancer	73	142340	0.000512857	92.8751	9.69657	0	0.786002	0.5	1	Null_Model_OpenChrom	human
FANTOM5_enhancer_cell	intestinal_epithelial_cell	Enhancer	190	142340	0.00133483	196.499	14.1747	0	0.966928	0.5	1	Null_Model_OpenChrom	human
FANTOM5_enhancer_cell	hepatocyte	Enhancer	75	142340	0.000526907	105.393	10.6868	0	0.711625	0.5	1	Null_Model_OpenChrom	human
FANTOM5_enhancer_cell	hepatic_stellate_cell	Enhancer	179	142340	0.00125755	175.489	13.2028	0	1.02001	0.5	1	Null_Model_OpenChrom	human
FANTOM5_enhancer_cell	hair_follicle_cell	Enhancer	241	142340	0.00169313	259.574	16.1065	0	0.928443	0.5	1	Null_Model_OpenChrom	human
FANTOM5_enhancer_cell	granulocyte	Enhancer	323	142340	0.00226921	684.257	28.9658	0	0.472045	0.5	1	Null_Model_OpenChrom	human
FANTOM5_enhancer_cell	keratinocyte	Enhancer	279	142340	0.0019601	342.313	18.6612	0	0.815044	0.5	1	Null_Model_OpenChrom	human
FANTOM5_enhancer_cell	gingival_epithelial_cell	Enhancer	277	142340	0.00194604	378.544	20.1667	0	0.73175	0.5	1	Null_Model_OpenChrom	human
FANTOM5_enhancer_cell	fibroblast_of_the_conjuctiva	Enhancer	110	142340	0.000772798	97.1239	9.76159	0	1.13257	0.5	1	Null_Model_OpenChrom	human
FANTOM5_enhancer_cell	fibroblast_of_pulmonary_artery	Enhancer	87	142340	0.000611213	115.848	11.0715	0	0.750983	0.5	1	Null_Model_OpenChrom	human
FANTOM5_enhancer_cell	fibroblast_of_periodontium	Enhancer	323	142340	0.00226921	343.04	18.1986	0	0.941581	0.5	1	Null_Model_OpenChrom	human
FANTOM5_enhancer_cell	fibroblast_of_lymphatic_vessel	Enhancer	178	142340	0.00125053	220.548	14.7763	0	0.807079	0.5	1	Null_Model_OpenChrom	human
FANTOM5_enhancer_cell	fibroblast_of_gingiva	Enhancer	321	142340	0.00225516	355.435	18.8652	0	0.90312	0.5	1	Null_Model_OpenChrom	human
Roadmapepigenomics_ActiveChromatin	CD4+_CD25-_CD45RO+_Memory_Primary	11_BivFlnk	709	142340	0.00498103	433.99	22.3023	0	1.63368	0.5	1	Null_Model_OpenChrom	human
FANTOM5_enhancer_cell	fibroblast_of_tunica_adventitia_of_artery	Enhancer	181	142340	0.0012716	226.907	14.8577	0	0.797683	0.5	1	Null_Model_OpenChrom	human
FANTOM5_enhancer_cell	keratocyte	Enhancer	78	142340	0.000547984	76.9081	8.72969	0	1.0142	0.5	1	Null_Model_OpenChrom	human
FANTOM5_enhancer_cell	kidney_epithelial_cell	Enhancer	635	142340	0.00446115	756.386	26.8634	0	0.839519	0.5	1	Null_Model_OpenChrom	human
FANTOM5_enhancer_cell	lens_epithelial_cell	Enhancer	215	142340	0.00151047	229.657	15.0848	0	0.936177	0.5	1	Null_Model_OpenChrom	human
FANTOM5_enhancer_cell	preadipocyte	Enhancer	457	142340	0.00321062	584.758	24.433	0	0.78152	0.5	1	Null_Model_OpenChrom	human
FANTOM5_enhancer_cell	placental_epithelial_cell	Enhancer	285	142340	0.00200225	312.239	18.3383	0	0.912763	0.5	1	Null_Model_OpenChrom	human
FANTOM5_enhancer_cell	pericyte_cell	Enhancer	262	142340	0.00184066	239.442	15.2815	0	1.09421	0.5	1	Null_Model_OpenChrom	human
FANTOM5_enhancer_cell	osteoblast	Enhancer	278	142340	0.00195307	302.766	17.527	0	0.9182	0.5	1	Null_Model_OpenChrom	human
FANTOM5_enhancer_cell	neutrophil	Enhancer	228	142340	0.0016018	484.073	23.9422	0	0.471003	0.5	1	Null_Model_OpenChrom	human
FANTOM5_enhancer_cell	neuron	Enhancer	189	142340	0.00132781	158.1	12.2917	0	1.19545	0.5	1	Null_Model_OpenChrom	human
FANTOM5_enhancer_cell	neuronal_stem_cell	Enhancer	58	142340	0.000407475	71.3916	8.67182	0	0.81242	0.5	1	Null_Model_OpenChrom	human
FANTOM5_enhancer_cell	natural_killer_cell	Enhancer	355	142340	0.00249403	661.486	28.1322	0	0.536671	0.5	1	Null_Model_OpenChrom	human
FANTOM5_enhancer_cell	myoblast	Enhancer	237	142340	0.00166503	298.332	17.8303	0	0.794418	0.5	1	Null_Model_OpenChrom	human
FANTOM5_enhancer_cell	mesothelial_cell	Enhancer	169	142340	0.0011873	215.834	15.0871	0	0.783009	0.5	1	Null_Model_OpenChrom	human
FANTOM5_enhancer_cell	melanocyte	Enhancer	263	142340	0.00184769	246.67	15.8427	0	1.0662	0.5	1	Null_Model_OpenChrom	human
FANTOM5_enhancer_cell	mast_cell	Enhancer	510	142340	0.00358297	783.682	29.6754	0	0.650774	0.5	1	Null_Model_OpenChrom	human
FANTOM5_enhancer_cell	mammary_epithelial_cell	Enhancer	239	142340	0.00167908	301.242	17.4518	0	0.793383	0.5	1	Null_Model_OpenChrom	human
FANTOM5_enhancer_cell	macrophage	Enhancer	282	142340	0.00198117	416.33	21.4082	0	0.677348	0.5	1	Null_Model_OpenChrom	human
FANTOM5_enhancer_cell	lymphocyte_of_B_lineage	Enhancer	213	142340	0.00149642	366.115	19.3123	0	0.581785	0.5	1	Null_Model_OpenChrom	human
FANTOM5_enhancer_cell	fat_cell	Enhancer	373	142340	0.00262049	398.271	20.0464	0	0.936549	0.5	1	Null_Model_OpenChrom	human
FANTOM5_enhancer_cell	reticulocyte	Enhancer	100	142340	0.000702543	138.567	11.6846	0	0.72167	0.5	1	Null_Model_OpenChrom	human
FANTOM5_enhancer_cell	epithelial_cell_of_prostate	Enhancer	286	142340	0.00200927	312.173	18.3198	0	0.916159	0.5	1	Null_Model_OpenChrom	human
FANTOM5_enhancer_cell	epithelial_cell_of_esophagus	Enhancer	100	142340	0.000702543	114.639	10.6541	0	0.872301	0.5	1	Null_Model_OpenChrom	human
Roadmapepigenomics_Histone_narrow	CD19_Primary_Cells_Cord_BI	H3K27me3	428	142340	0.00300688	812.184	30.1282	0	0.526974	0.5	1	Null_Model_OpenChrom	human
Roadmapepigenomics_Histone_narrow	CD19_Primary_Cells_Cord_BI	H3K9me3	582	142340	0.0040888	511.067	22.6267	0	1.13879	0.5	1	Null_Model_OpenChrom	human
Roadmapepigenomics_Histone_narrow	CD3_Primary_Cells_Cord_BI	H3K9me3	606	142340	0.00425741	405.986	21.2393	0	1.49266	0.5	1	Null_Model_OpenChrom	human
Roadmapepigenomics_Histone_narrow	Fetal_Kidney	H3K9me3	572	142340	0.00401855	520.773	23.3541	0	1.09837	0.5	1	Null_Model_OpenChrom	human
eQTLs_GTEx_Analysis_V6	Vagina	none	586	142340	0.0041169	617.858	24.1143	0	0.948438	0.5	1	Null_Model_OpenChrom	human
eQTLs_GTEx_Analysis_V6	Uterus	none	566	142340	0.00397639	570.315	23.3702	0	0.992435	0.5	1	Null_Model_OpenChrom	human
eQTLs	Liver	none	105	142340	0.00073767	125.047	11.2747	0	0.839685	0.5	1	Null_Model_OpenChrom	human
Roadmapepigenomics_Histone_narrow	H1_BMP4_Derived_Mesendoderm_Cultured_Cells	H3K36me3	320	142340	0.00224814	459.264	21.1279	0	0.696767	0.5	1	Null_Model_OpenChrom	human
eQTLs	Dendritic_cells	none	12	142340	8.43052e-05	15.3866	4.11696	0	0.779899	0.5	1	Null_Model_OpenChrom	human
eQTLs	Brain_Cortex	none	13	142340	9.13306e-05	12.3177	3.55119	0	1.05539	0.5	1	Null_Model_OpenChrom	human
Enhancers_Hnisz2013	UCSD_Adipose_Tissue	Enhancer	234	142340	0.00164395	270.248	16.5334	0	0.865872	0.5	1	Null_Model_OpenChrom	human
Roadmapepigenomics_Histone_narrow	HUVEC_Umbilical_Vein_Endothelial_Cells	H3K9me1	657	142340	0.00461571	1176.1	38.2201	0	0.558627	0.5	1	Null_Model_OpenChrom	human
Enhancers_Hnisz2013	CD34_fetal	Enhancer	348	142340	0.00244485	492.865	23.37	0	0.706076	0.5	1	Null_Model_OpenChrom	human
Roadmapepigenomics_Histone_narrow	NHDF-Ad_Adult_Dermal_Fibroblasts	H3K9me3	475	142340	0.00333708	337.139	18.9371	0	1.40892	0.5	1	Null_Model_OpenChrom	human
eQTLs	Fibroblasts	none	14	142340	9.8356e-05	13.9491	3.72671	0	1.00365	0.5	1	Null_Model_OpenChrom	human
eQTLs	Monocytes	none	583	142340	0.00409583	882.839	31.3094	0	0.660369	0.5	1	Null_Model_OpenChrom	human
eQTLs	T-cells	none	16	142340	0.000112407	15.4256	4.09813	0	1.03724	0.5	1	Null_Model_OpenChrom	human
FANTOM5_enhancer_cell	acinar_cell	Enhancer	169	142340	0.0011873	222.756	15.1695	0	0.758677	0.5	1	Null_Model_OpenChrom	human
FANTOM5_enhancer_cell	enteric_smooth_muscle_cell	Enhancer	232	142340	0.0016299	231.037	14.5502	0	1.00417	0.5	1	Null_Model_OpenChrom	human
FANTOM5_enhancer_cell	endothelial_cell_of_lymphatic_vessel	Enhancer	157	142340	0.00110299	199.42	13.6459	0	0.787285	0.5	1	Null_Model_OpenChrom	human
FANTOM5_enhancer_cell	endothelial_cell_of_hepatic_sinusoid	Enhancer	175	142340	0.00122945	196.999	14.3663	0	0.888329	0.5	1	Null_Model_OpenChrom	human
FANTOM5_enhancer_cell	dendritic_cell	Enhancer	561	142340	0.00394127	1010.72	34.9338	0	0.55505	0.5	1	Null_Model_OpenChrom	human
FANTOM5_enhancer_cell	corneal_epithelial_cell	Enhancer	124	142340	0.000871154	130.095	11.4369	0	0.95315	0.5	1	Null_Model_OpenChrom	human
FANTOM5_enhancer_cell	circulating_cell	Enhancer	139	142340	0.000976535	301.138	18.2863	0	0.461583	0.5	1	Null_Model_OpenChrom	human
FANTOM5_enhancer_cell	ciliated_epithelial_cell	Enhancer	230	142340	0.00161585	222.903	14.5407	0	1.03184	0.5	1	Null_Model_OpenChrom	human
FANTOM5_enhancer_cell	chondrocyte	Enhancer	195	142340	0.00136996	219.938	14.6277	0	0.886613	0.5	1	Null_Model_OpenChrom	human
FANTOM5_enhancer_cell	cardiac_myocyte	Enhancer	155	142340	0.00108894	154.076	12.2714	0	1.006	0.5	1	Null_Model_OpenChrom	human
FANTOM5_enhancer_cell	cardiac_fibroblast	Enhancer	353	142340	0.00247998	413.262	19.6555	0	0.85418	0.5	1	Null_Model_OpenChrom	human
FANTOM5_enhancer_cell	bronchial_smooth_muscle_cell	Enhancer	126	142340	0.000885204	119.043	10.9581	0	1.05844	0.5	1	Null_Model_OpenChrom	human
FANTOM5_enhancer_cell	blood_vessel_endothelial_cell	Enhancer	550	142340	0.00386399	684.384	26.9511	0	0.803643	0.5	1	Null_Model_OpenChrom	human
FANTOM5_enhancer_cell	basophil	Enhancer	433	142340	0.00304201	889.17	34.0947	0	0.486971	0.5	1	Null_Model_OpenChrom	human
FANTOM5_enhancer_cell	astrocyte	Enhancer	486	142340	0.00341436	457.006	20.9258	0	1.06344	0.5	1	Null_Model_OpenChrom	human
FANTOM5_enhancer_cell	amniotic_epithelial_cell	Enhancer	207	142340	0.00145426	221.491	15.1555	0	0.934577	0.5	1	Null_Model_OpenChrom	human
FANTOM5_enhancer_cell	epithelial_cell_of_Malassez	Enhancer	186	142340	0.00130673	244.169	15.7631	0	0.761768	0.5	1	Null_Model_OpenChrom	human
Roadmapepigenomics_ActiveChromatin	CD4+_CD25-_CD45RO+_Memory_Primary	10_TssBiv	223	142340	0.00156667	95.9491	10.5491	0	2.32415	0.5	1	Null_Model_OpenChrom	human
VistaEnhancers	Any	Enhancer	139	142340	0.000976535	225.8	15.1735	0	0.615588	0.5	1	Null_Model_OpenChrom	human
Roadmapepigenomics_ActiveChromatin	Brain_Angular_Gyrus	3_TxFlnk	58	142340	0.000407475	111.939	10.6334	0	0.518139	0.5	1	Null_Model_OpenChrom	human
Roadmapepigenomics_ActiveChromatin	Breast_vHMEC	3_TxFlnk	40	142340	0.000281017	158.057	12.6842	0	0.253073	0.5	1	Null_Model_OpenChrom	human
Roadmapepigenomics_ActiveChromatin	A549_EtOH_0.02pct_Lung_Carcinoma	11_BivFlnk	529	142340	0.00371645	376.428	19.5417	0	1.40532	0.5	1	Null_Model_OpenChrom	human
Roadmapepigenomics_ActiveChromatin	Brain_Dorsolateral_Prefrontal_Cortex	3_TxFlnk	116	142340	0.00081495	210.305	14.8319	0	0.551581	0.5	1	Null_Model_OpenChrom	human
Roadmapepigenomics_ActiveChromatin	Breast_vHMEC	11_BivFlnk	310	142340	0.00217788	176.486	14.3256	0	1.75652	0.5	1	Null_Model_OpenChrom	human
Roadmapepigenomics_ActiveChromatin	Bone_Marrow_Derived_Mesenchymal_Stem_Cell	3_TxFlnk	285	142340	0.00200225	663.225	28.2292	0	0.429719	0.5	1	Null_Model_OpenChrom	human
Roadmapepigenomics_ActiveChromatin	Adipose_Derived_Mesenchymal_Stem_Cell	3_TxFlnk	226	142340	0.00158775	647.009	29.2251	0	0.3493	0.5	1	Null_Model_OpenChrom	human
Roadmapepigenomics_ActiveChromatin	CD34_Primary	3_TxFlnk	35	142340	0.00024589	103.392	10.404	0	0.338519	0.5	1	Null_Model_OpenChrom	human
Roadmapepigenomics_ActiveChromatin	Breast_Myoepithelial	3_TxFlnk	259	142340	0.00181959	611.117	27.3858	0	0.423814	0.5	1	Null_Model_OpenChrom	human
Roadmapepigenomics_ActiveChromatin	CD34_Primary	6_EnhG	490	142340	0.00344246	961.628	34.1212	0	0.509552	0.5	1	Null_Model_OpenChrom	human
Roadmapepigenomics_ActiveChromatin	Adult_Liver	3_TxFlnk	87	142340	0.000611213	187.455	13.7899	0	0.464113	0.5	1	Null_Model_OpenChrom	human
Roadmapepigenomics_ActiveChromatin	Brain_Angular_Gyrus	11_BivFlnk	394	142340	0.00276802	302.364	17.7319	0	1.30307	0.5	1	Null_Model_OpenChrom	human
Roadmapepigenomics_ActiveChromatin	Brain_Substantia_Nigra	3_TxFlnk	79	142340	0.000555009	144.463	12.5536	0	0.546855	0.5	1	Null_Model_OpenChrom	human
Roadmapepigenomics_ActiveChromatin	Brain_Dorsolateral_Prefrontal_Cortex	12_EnhBiv	689	142340	0.00484052	688.339	26.5451	0	1.00096	0.5	1	Null_Model_OpenChrom	human
Roadmapepigenomics_ActiveChromatin	Bone_Marrow_Derived_Mesenchymal_Stem_Cell	12_EnhBiv	529	142340	0.00371645	423.409	21.0029	0	1.24938	0.5	1	Null_Model_OpenChrom	human
Roadmapepigenomics_ActiveChromatin	Brain_Angular_Gyrus	12_EnhBiv	442	142340	0.00310524	412.148	20.4981	0	1.07243	0.5	1	Null_Model_OpenChrom	human
Roadmapepigenomics_ActiveChromatin	Adult_Liver	11_BivFlnk	491	142340	0.00344949	332.694	19.1257	0	1.47583	0.5	1	Null_Model_OpenChrom	human
Roadmapepigenomics_ActiveChromatin	Adult_Liver	10_TssBiv	86	142340	0.000604187	87.2238	9.54421	0	0.98597	0.5	1	Null_Model_OpenChrom	human
Roadmapepigenomics_ActiveChromatin	CD3_Primary_Peripheral_UW	3_TxFlnk	208	142340	0.00146129	437.695	22.0778	0	0.475216	0.5	1	Null_Model_OpenChrom	human
Roadmapepigenomics_ActiveChromatin	CD3_Primary_Cord_BI	12_EnhBiv	616	142340	0.00432767	702.639	25.8348	0	0.876694	0.5	1	Null_Model_OpenChrom	human
Roadmapepigenomics_ActiveChromatin	Brain_Substantia_Nigra	12_EnhBiv	671	142340	0.00471406	606.053	24.3431	0	1.10716	0.5	1	Null_Model_OpenChrom	human
Roadmapepigenomics_ActiveChromatin	Brain_Substantia_Nigra	11_BivFlnk	512	142340	0.00359702	385.913	19.9621	0	1.32672	0.5	1	Null_Model_OpenChrom	human
Roadmapepigenomics_ActiveChromatin	Aorta	3_TxFlnk	42	142340	0.000295068	77.0569	8.72741	0	0.545051	0.5	1	Null_Model_OpenChrom	human
Roadmapepigenomics_ActiveChromatin	A549_EtOH_0.02pct_Lung_Carcinoma	12_EnhBiv	370	142340	0.00259941	329.627	18.5782	0	1.12248	0.5	1	Null_Model_OpenChrom	human
Roadmapepigenomics_ActiveChromatin	Brain_Anterior_Caudate	3_TxFlnk	125	142340	0.000878179	228.866	15.5795	0	0.546171	0.5	1	Null_Model_OpenChrom	human
Roadmapepigenomics_ActiveChromatin	CD3_Primary_Cord_BI	3_TxFlnk	161	142340	0.00113109	415.828	21.922	0	0.387179	0.5	1	Null_Model_OpenChrom	human
Roadmapepigenomics_ActiveChromatin	Adipose_Nuclei	3_TxFlnk	147	142340	0.00103274	306.836	18.4748	0	0.479083	0.5	1	Null_Model_OpenChrom	human
Roadmapepigenomics_ActiveChromatin	Brain_Anterior_Caudate	11_BivFlnk	649	142340	0.00455951	492.411	23.4914	0	1.31801	0.5	1	Null_Model_OpenChrom	human
Roadmapepigenomics_ActiveChromatin	Brain_Anterior_Caudate	12_EnhBiv	462	142340	0.00324575	483.381	22.1672	0	0.955769	0.5	1	Null_Model_OpenChrom	human
Roadmapepigenomics_ActiveChromatin	Brain_Cingulate_Gyrus	3_TxFlnk	93	142340	0.000653365	192.938	14.1225	0	0.48202	0.5	1	Null_Model_OpenChrom	human
Roadmapepigenomics_ActiveChromatin	CD34_Primary	10_TssBiv	549	142340	0.00385696	337.16	19.698	0	1.62831	0.5	1	Null_Model_OpenChrom	human
Roadmapepigenomics_ActiveChromatin	Brain_Inferior_Temporal_Lobe	3_TxFlnk	116	142340	0.00081495	224.004	15.3388	0	0.517848	0.5	1	Null_Model_OpenChrom	human
Roadmapepigenomics_ActiveChromatin	CD14_Primary	3_TxFlnk	92	142340	0.00064634	171.415	13.1149	0	0.53671	0.5	1	Null_Model_OpenChrom	human
MegaMPRA_SNPs	HepG2	none	365	142340	0.00256428	392.497	20.2245	0	0.929945	0.5	1	Null_Model_OpenChrom	human
Roadmapepigenomics_ActiveChromatin	Aorta	12_EnhBiv	115	142340	0.000807925	73.0909	9.01636	0	1.57338	0.5	1	Null_Model_OpenChrom	human
Roadmapepigenomics_ActiveChromatin	CD14_Primary	10_TssBiv	639	142340	0.00448925	279.03	20.0557	0	2.29008	0.5	1	Null_Model_OpenChrom	human
Roadmapepigenomics_ActiveChromatin	CD15_Primary	3_TxFlnk	186	142340	0.00130673	360.137	19.3582	0	0.51647	0.5	1	Null_Model_OpenChrom	human
Roadmapepigenomics_ActiveChromatin	CD19_Primary_Cord_BI	10_TssBiv	521	142340	0.00366025	356.423	19.3498	0	1.46175	0.5	1	Null_Model_OpenChrom	human
Roadmapepigenomics_ActiveChromatin	CD19_Primary_Peripheral_UW	10_TssBiv	417	142340	0.00292961	168.415	15.8289	0	2.47603	0.5	1	Null_Model_OpenChrom	human
Roadmapepigenomics_ActiveChromatin	4star	3_TxFlnk	87	142340	0.000611213	149.402	12.3154	0	0.582323	0.5	1	Null_Model_OpenChrom	human
Roadmapepigenomics_ActiveChromatin	CD34	10_TssBiv	433	142340	0.00304201	216.218	15.9238	0	2.00261	0.5	1	Null_Model_OpenChrom	human
Roadmapepigenomics_ActiveChromatin	Aorta	2_TssAFlnk	607	142340	0.00426444	679.971	26.534	0	0.892685	0.5	1	Null_Model_OpenChrom	human
Roadmapepigenomics_ActiveChromatin	Aorta	6_EnhG	339	142340	0.00238162	467.658	22.6096	0	0.724888	0.5	1	Null_Model_OpenChrom	human
Roadmapepigenomics_ActiveChromatin	Aorta	11_BivFlnk	66	142340	0.000463679	39.6613	6.47937	0	1.66409	0.5	1	Null_Model_OpenChrom	human
Roadmapepigenomics_ActiveChromatin	Aorta	10_TssBiv	394	142340	0.00276802	222.901	16.6741	0	1.7676	0.5	1	Null_Model_OpenChrom	human
Roadmapepigenomics_ActiveChromatin	Brain_Germinal_Matrix	6_EnhG	510	142340	0.00358297	977.605	34.6164	0	0.521683	0.5	1	Null_Model_OpenChrom	human
Roadmapepigenomics_ActiveChromatin	Brain_Germinal_Matrix	3_TxFlnk	162	142340	0.00113812	330.111	18.6549	0	0.490744	0.5	1	Null_Model_OpenChrom	human
Roadmapepigenomics_ActiveChromatin	Brain_Hippocampus_Middle	3_TxFlnk	125	142340	0.000878179	250.648	16.6131	0	0.498707	0.5	1	Null_Model_OpenChrom	human
Roadmapepigenomics_ActiveChromatin	Bone_Marrow_Derived_Mesenchymal_Stem_Cell	11_BivFlnk	687	142340	0.00482647	356.992	21.4435	0	1.92441	0.5	1	Null_Model_OpenChrom	human
Roadmapepigenomics_ActiveChromatin	A549_EtOH_0.02pct_Lung_Carcinoma	3_TxFlnk	605	142340	0.00425039	1352.64	43.6462	0	0.447273	0.5	1	Null_Model_OpenChrom	human
Roadmapepigenomics_ActiveChromatin	Adipose_Nuclei	10_TssBiv	672	142340	0.00472109	511.667	23.2819	0	1.31335	0.5	1	Null_Model_OpenChrom	human
Roadmapepigenomics_ActiveChromatin	CD19_Primary_Cord_BI	3_TxFlnk	109	142340	0.000765772	327.746	20.0024	0	0.332574	0.5	1	Null_Model_OpenChrom	human
Roadmapepigenomics_ActiveChromatin	CD34	3_TxFlnk	393	142340	0.00276099	886.511	33.2297	0	0.443311	0.5	1	Null_Model_OpenChrom	human
Roadmapepigenomics_ActiveChromatin	CD19_Primary_Peripheral_UW	3_TxFlnk	151	142340	0.00106084	295.693	17.3009	0	0.510664	0.5	1	Null_Model_OpenChrom	human
Roadmapepigenomics_Histone_narrow	Fetal_Lung	H3K9ac	17035	142340	0.119678	17036.5	122.955	-0.012358	0.999911	0.50493	1	Null_Model_OpenChrom	human
GSE62742_Histone	GM18519	H3K4ME3	15027	142340	0.105571	15029.5	114.668	-0.0220852	0.999832	0.50881	1	Null_Model_OpenChrom	human
Misc_ChIP	LoVo	H3	19564	142340	0.137446	19568.6	127.89	-0.036331	0.999763	0.514491	1	Null_Model_OpenChrom	human
Roadmapepigenomics_ActiveChromatin	CD4+_CD25int_CD127+_Tmem_Primary	ActiveChromatin	20122	142340	0.141366	20131.9	125.57	-0.078873	0.999508	0.531433	1	Null_Model_OpenChrom	human
Roadmapepigenomics_ActiveChromatin	Fetal_Intestine_Small	2_TssAFlnk	3583	142340	0.0251721	3588.42	59.6945	-0.0907719	0.99849	0.536163	1	Null_Model_OpenChrom	human
Roadmapepigenomics_Histone_narrow	Adult_Liver	H3K27me3	5315	142340	0.0373402	5322.76	75.9382	-0.102139	0.998543	0.540677	1	Null_Model_OpenChrom	human
Roadmapepigenomics_ActiveChromatin	Brain_Cingulate_Gyrus	2_TssAFlnk	5849	142340	0.0410918	5860.31	74.9443	-0.150895	0.99807	0.559971	1	Null_Model_OpenChrom	human
GSE62742_Histone	GM18498	H3K4ME3	15856	142340	0.111395	15891.1	119.975	-0.292536	0.997791	0.615062	1	Null_Model_OpenChrom	human
GSE62742_Histone	GM18871	H3K4ME3	15231	142340	0.107004	15275	115.986	-0.37897	0.997122	0.647645	1	Null_Model_OpenChrom	human
eQTLs_GTEx_Analysis_V6	Small_Intestine_Terminal_Ileum	none	834	142340	0.00585921	845.884	28.1645	-0.421954	0.985951	0.663471	1	Null_Model_OpenChrom	human
Roadmapepigenomics_Histone_narrow	Spleen	H3K27me3	4368	142340	0.0306871	4400.31	64.8815	-0.49795	0.992658	0.69074	1	Null_Model_OpenChrom	human
GSE62742_Histone	GM19143	H3K4ME3	15274	142340	0.107306	15339.5	114.177	-0.573255	0.995733	0.716764	1	Null_Model_OpenChrom	human
Roadmapepigenomics_ActiveChromatin	Brain_Dorsolateral_Prefrontal_Cortex	2_TssAFlnk	4708	142340	0.0330757	4762.6	68.5103	-0.79701	0.988535	0.787277	1	Null_Model_OpenChrom	human
GSE62742_Histone	GM19144	H3K4ME3	15823	142340	0.111163	15912.4	111.996	-0.797972	0.994384	0.787557	1	Null_Model_OpenChrom	human
Roadmapepigenomics_Histone_narrow	K562_Leukemia	H3K9ac	12126	142340	0.0851904	12224.3	108.896	-0.902401	0.991961	0.816578	1	Null_Model_OpenChrom	human
Roadmapepigenomics_Histone_narrow	Adipose_Derived_Mesenchymal_Stem_Cell_Cultured_Cells	H3K4me3	21726	142340	0.152635	21851.8	139.331	-0.903125	0.994242	0.81677	1	Null_Model_OpenChrom	human
Roadmapepigenomics_Histone_narrow	CD8_Naive_Primary_Cells	H3K27ac	10564	142340	0.0742167	10666.7	100.47	-1.02267	0.990367	0.846769	1	Null_Model_OpenChrom	human
GSE62742_Histone	GM19207	H3K4ME3	15191	142340	0.106723	15316.8	121.434	-1.03573	0.991789	0.849836	1	Null_Model_OpenChrom	human
eQTLs_GTEx_Analysis_V7	Brain_Substantia_nigra	none	1044	142340	0.00733455	1079.57	32.9573	-1.07932	0.96705	0.859777	1	Null_Model_OpenChrom	human
Roadmapepigenomics_Histone_narrow	Skeletal_Muscle_Male	H3K9ac	24743	142340	0.17383	24900.6	143.082	-1.10152	0.993671	0.864665	1	Null_Model_OpenChrom	human
GSE62742_Histone	GM18507	H3K4ME3	14726	142340	0.103457	14854.1	115.09	-1.11302	0.991376	0.867149	1	Null_Model_OpenChrom	human
Roadmapepigenomics_Histone_narrow	H1_BMP4_Derived_Trophoblast_Cultured_Cells	H3K79me2	14688	142340	0.10319	14820.5	116.836	-1.13402	0.99106	0.871607	1	Null_Model_OpenChrom	human
eQTLs_GTEx_Analysis_V7	Vagina	none	1580	142340	0.0111002	1629.22	40.4364	-1.21731	0.969787	0.888257	1	Null_Model_OpenChrom	human
Roadmapepigenomics_ActiveChromatin	CD4+_CD25int_CD127+_Tmem_Primary	2_TssAFlnk	5350	142340	0.0375861	5436.3	69.0132	-1.25054	0.984125	0.894449	1	Null_Model_OpenChrom	human
Roadmapepigenomics_Histone_narrow	CD4+_CD25int_CD127+_Tmem_Primary_Cellsls	H3K27me3	8211	142340	0.0576858	8331.83	88.0462	-1.37237	0.985498	0.915026	1	Null_Model_OpenChrom	human
eQTLs_GTEx_Analysis_V7	Small_Intestine_Terminal_Ileum	none	2876	142340	0.0202051	2950.63	53.7546	-1.38843	0.974706	0.917496	1	Null_Model_OpenChrom	human
Roadmapepigenomics_ActiveChromatin	Peripheral_Blood_Mononuclear_Primary	ActiveChromatin	18927	142340	0.13297	19120.5	132.747	-1.45768	0.98988	0.927536	1	Null_Model_OpenChrom	human
GSE62742_Histone	GM19206	H3K4ME3	15067	142340	0.105852	15232.7	112.227	-1.47615	0.989124	0.930048	1	Null_Model_OpenChrom	human
GSE62742_Histone	GM19093	H3K4ME3	15959	142340	0.112119	16141.1	121.765	-1.49535	0.988719	0.932588	1	Null_Model_OpenChrom	human
GSE62742_Histone	GM18858	H3K4ME3	15186	142340	0.106688	15363.9	117.453	-1.5146	0.988421	0.935063	1	Null_Model_OpenChrom	human
eQTLs_GTEx_Analysis_V7	Uterus	none	1546	142340	0.0108613	1608.65	40.2381	-1.55704	0.961053	0.940269	1	Null_Model_OpenChrom	human
eQTLs_GTEx_Analysis_V6	Brain_Hypothalamus	none	812	142340	0.00570465	858.401	29.2402	-1.58688	0.945945	0.94373	1	Null_Model_OpenChrom	human
GSE62742_Histone	GM18909	H3K4ME3	15198	142340	0.106773	15388.4	117.626	-1.61849	0.987629	0.947221	1	Null_Model_OpenChrom	human
eQTLs_GTEx_Analysis_V6	Brain_Nucleus_accumbens_basal_ganglia	none	1406	142340	0.00987776	1468.6	37.4052	-1.67357	0.957374	0.952893	1	Null_Model_OpenChrom	human
eQTLs_GTEx_Analysis_V7	Brain_Hypothalamus	none	2025	142340	0.0142265	2101.01	45.3023	-1.67784	0.963822	0.953311	1	Null_Model_OpenChrom	human
GSE62742_Histone	GM18505	H3K4ME3	15209	142340	0.10685	15408.8	116.225	-1.71903	0.987034	0.957195	1	Null_Model_OpenChrom	human
Roadmapepigenomics_Histone_narrow	iPS-20b_Cell_Line	H3K27ac	12656	142340	0.0889139	12836.6	104.189	-1.73295	0.985934	0.958447	1	Null_Model_OpenChrom	human
eQTLs_GTEx_Analysis_V7	Brain_Spinal_cord_cervical_c-1	none	1548	142340	0.0108754	1619.82	41.3484	-1.73686	0.955664	0.958794	1	Null_Model_OpenChrom	human
GSE62742_Histone	GM18870	H3K4ME3	14894	142340	0.104637	15093.3	114.326	-1.7429	0.986798	0.959324	1	Null_Model_OpenChrom	human
GSE62742_Histone	GM19222	H3K4ME3	15121	142340	0.106232	15320.2	113.966	-1.74764	0.986999	0.959737	1	Null_Model_OpenChrom	human
Roadmapepigenomics_Histone_narrow	Dnd41_TCell_Leukemia	H3K9ac	12709	142340	0.0892862	12901.4	110.045	-1.74881	0.985083	0.959838	1	Null_Model_OpenChrom	human
Roadmapepigenomics_ActiveChromatin	CD4+_CD25-_IL17+_PMA-Ionomcyin_stimulated_Th17_Primary	2_TssAFlnk	6847	142340	0.0481031	6993.85	81.2897	-1.80644	0.979004	0.964575	1	Null_Model_OpenChrom	human
eQTLs_GTEx_Analysis_V6	Brain_Frontal_Cortex_BA9	none	1394	142340	0.00979345	1464.35	38.4012	-1.83191	0.95196	0.966518	1	Null_Model_OpenChrom	human
Roadmapepigenomics_ActiveChromatin	Brain_Anterior_Caudate	2_TssAFlnk	6329	142340	0.044464	6475.2	78.7433	-1.85663	0.977422	0.968318	1	Null_Model_OpenChrom	human
GSE62742_Histone	GM18502	H3K4ME3	15047	142340	0.105712	15271.5	120.713	-1.86009	0.985297	0.968564	1	Null_Model_OpenChrom	human
Roadmapepigenomics_Histone_narrow	H1_BMP4_Derived_Trophoblast_Cultured_Cells	H3K14ac	20159	142340	0.141626	20414.8	134.536	-1.90152	0.987469	0.971383	1	Null_Model_OpenChrom	human
Roadmapepigenomics_Histone_narrow	HUVEC_Umbilical_Vein_Endothelial_Cells	H3K9ac	15232	142340	0.107011	15451.3	115.304	-1.9022	0.985805	0.971427	1	Null_Model_OpenChrom	human
eQTLs_GTEx_Analysis_V8	Kidney_Cortex	none	874	142340	0.00614023	933.32	31.1364	-1.90515	0.936442	0.97162	1	Null_Model_OpenChrom	human
eQTLs_GTEx_Analysis_V6	Liver	none	1095	142340	0.00769285	1158.87	32.9591	-1.93774	0.944889	0.973672	1	Null_Model_OpenChrom	human
Roadmapepigenomics_ActiveChromatin	Brain_Hippocampus_Middle	12_EnhBiv	1118	142340	0.00785443	1187.36	35.0841	-1.97695	0.941585	0.975977	1	Null_Model_OpenChrom	human
GSE62742_Histone	GM19099	H3K4ME3	15489	142340	0.108817	15739.1	119.319	-2.0958	0.984112	0.98195	1	Null_Model_OpenChrom	human
Roadmapepigenomics_ActiveChromatin	Brain_Hippocampus_Middle	2_TssAFlnk	6853	142340	0.0481453	7030.23	81.6053	-2.17179	0.97479	0.985064	1	Null_Model_OpenChrom	human
eQTLs_GTEx_Analysis_V6	Brain_Hippocampus	none	745	142340	0.00523395	810.926	30.0648	-2.1928	0.918703	0.985839	1	Null_Model_OpenChrom	human
eQTLs_GTEx_Analysis_V6	Artery_Coronary	none	1672	142340	0.0117465	1762.67	41.0974	-2.20611	0.948564	0.986312	1	Null_Model_OpenChrom	human
Roadmapepigenomics_ActiveChromatin	Brain_Angular_Gyrus	2_TssAFlnk	4424	142340	0.0310805	4561.02	62.0014	-2.21001	0.969958	0.986448	1	Null_Model_OpenChrom	human
GSE62742_Histone	GM18489	H3K4ME3	15628	142340	0.109793	15895	120.543	-2.21531	0.9832	0.986631	1	Null_Model_OpenChrom	human
GSE62742_Histone	GM18508	H3K4ME3	15617	142340	0.109716	15880.6	117.971	-2.23436	0.983402	0.98727	1	Null_Model_OpenChrom	human
Roadmapepigenomics_Histone_narrow	Pancreatic_Islets	H3K27me3	4208	142340	0.029563	4349.52	63.327	-2.2348	0.967462	0.987285	1	Null_Model_OpenChrom	human
eQTLs_GTEx_Analysis_V7	Brain_Frontal_Cortex_BA9	none	3113	142340	0.0218702	3239.06	55.5765	-2.26831	0.96108	0.988345	1	Null_Model_OpenChrom	human
GSE62742_Histone	GM19127	H3K4ME3	15213	142340	0.106878	15479.9	116.404	-2.29259	0.98276	0.989064	1	Null_Model_OpenChrom	human
eQTLs_GTEx_Analysis_V7	Prostate	none	2597	142340	0.018245	2715.14	51.0618	-2.31368	0.956488	0.989657	1	Null_Model_OpenChrom	human
eQTLs_GTEx_Analysis_V6	Brain_Anterior_cingulate_cortex_BA24	none	797	142340	0.00559927	867.705	30.5268	-2.31617	0.918515	0.989726	1	Null_Model_OpenChrom	human
Roadmapepigenomics_Histone_narrow	4star	H3K27me3	9330	142340	0.0655473	9569.24	98.1122	-2.43848	0.974999	0.992625	1	Null_Model_OpenChrom	human
Roadmapepigenomics_Histone_narrow	Fetal_Heart	H3K9ac	23095	142340	0.162252	23443.3	142.252	-2.44813	0.985145	0.99282	1	Null_Model_OpenChrom	human
Roadmapepigenomics_Histone_narrow	Bone_Marrow_Derived_Mesenchymal_Stem_Cell_Cultured_Cells	H3K9ac	15816	142340	0.111114	16108.4	118.322	-2.47149	0.981846	0.993272	1	Null_Model_OpenChrom	human
Roadmapepigenomics_Histone_narrow	Adipose_Nuclei	H3K9ac	18083	142340	0.127041	18393.2	125.195	-2.47752	0.983136	0.993385	1	Null_Model_OpenChrom	human
eQTLs_GTEx_Analysis_V6	Brain_Putamen_basal_ganglia	none	1025	142340	0.00720107	1106.55	32.8013	-2.48608	0.926305	0.993542	1	Null_Model_OpenChrom	human
eQTLs_GTEx_Analysis_V7	Brain_Amygdala	none	1341	142340	0.0094211	1436.19	38.1704	-2.49392	0.933718	0.993683	1	Null_Model_OpenChrom	human
eQTLs_GTEx_Analysis_V7	Ovary	none	2398	142340	0.016847	2522.73	49.4075	-2.52454	0.950557	0.994208	1	Null_Model_OpenChrom	human
Roadmapepigenomics_Histone_narrow	H1_Derived_Neuronal_Progenitor_Cultured_Cells	H3K27me3	3626	142340	0.0254742	3786.32	62.3147	-2.57271	0.957659	0.994955	1	Null_Model_OpenChrom	human
GSE62742_Histone	GM18510	H3K4ME3	14993	142340	0.105332	15292.2	116.014	-2.57931	0.980432	0.99505	1	Null_Model_OpenChrom	human
Roadmapepigenomics_Histone_narrow	H1_Derived_Neuronal_Progenitor_Cultured_Cells	H2BK12ac	9768	142340	0.0686244	10025.3	99.1696	-2.59428	0.974337	0.995261	1	Null_Model_OpenChrom	human
eQTLs_GTEx_Analysis_V6	Ovary	none	993	142340	0.00697625	1075.44	31.0438	-2.65565	0.923342	0.996042	1	Null_Model_OpenChrom	human
eQTLs_GTEx_Analysis_V6	Brain_Caudate_basal_ganglia	none	1686	142340	0.0118449	1800.16	42.2673	-2.70102	0.936581	0.996544	1	Null_Model_OpenChrom	human
Roadmapepigenomics_Histone_narrow	Psoas_Muscle	H3K27me3	6939	142340	0.0487495	7167.59	83.7139	-2.73059	0.968108	0.996839	1	Null_Model_OpenChrom	human
eQTLs_GTEx_Analysis_V6	Prostate	none	936	142340	0.0065758	1022.33	31.5876	-2.73318	0.915551	0.996864	1	Null_Model_OpenChrom	human
GSE62742_Histone	GM19257	H3K4ME3	14628	142340	0.102768	14943.8	112.737	-2.80163	0.978864	0.997458	1	Null_Model_OpenChrom	human
Roadmapepigenomics_Histone_narrow	Monocytes-CD14+_RO01746	H3K9ac	16069	142340	0.112892	16415.6	121.694	-2.84822	0.978885	0.997802	1	Null_Model_OpenChrom	human
eQTLs_GTEx_Analysis_V8	Vagina	none	2756	142340	0.0193621	2909.78	53.5652	-2.87082	0.947152	0.997953	1	Null_Model_OpenChrom	human
[truncated: 1,340 more rows]

## Sheet: HFF_CTCF_HCMV_rep2_TF_RELI
Track	Cell	TF	Overlap	Total	Ratio	Mean	STD	Z-score	Enrichment	P-val	Corrected P-val	Null_Model	Species
[truncated: 1,544 more rows]

## Sheet: HFF_CTCF_HCMV_rep2_nonTF_RELI
Track	Cell	TF	Overlap	Total	Ratio	Mean	STD	Z-score	Enrichment	P-val	Corrected P-val	Null_Model	Species
[truncated: 2,634 more rows]

[truncated: 32 more sheets: HFF_CTCF_UI_rep1_TF_RELI, HFF_CTCF_UI_rep1_nonTF_RELI, HFF_CTCF_UI_rep2_TF_RELI, HFF_CTCF_UI_rep2_nonTF_RELI, HFF_H3K27ac_HCMV_rep1_TF_REL, HFF_H3K27ac_HCMV_rep1_nonTF_REL, HFF_H3K27ac_HCMV_rep2_TF_REL, HFF_H3K27ac_HCMV_rep2_nonTF_REL, HFF_H3K27ac_UI_rep1_TF_RELI, HFF_H3K27ac_UI_rep1_nonTF_RELI, HFF_H3K27ac_UI_rep2_TF_RELI, HFF_H3K27ac_UI_rep2_nonTF_RELI, HFF_TEAD1_HCMV_rep1_TF_RELI, HFF_TEAD1_HCMV_rep1_nonTF_RELI, HFF_TEAD1_HCMV_rep2_TF_RELI, HFF_TEAD1_HCMV_rep2_nonTF_RELI, HFF_TEAD1_UI_rep1_TF_RELI, HFF_TEAD1_UI_rep1_nonTF_RELI, HFF_TEAD1_UI_rep2_TF_RELI, HFF_TEAD1_UI_rep2_nonTF_RELI …]
