# Supplementary material for: Human cytomegalovirus infection coopts chromatin organization to diminish TEAD1 transcription factor activity
Source: bioRxiv preprint, doi:10.1101/2024.04.12.588762, version 4 (2025-06-02)
Supplement: Supplemental Dataset 8 [file 588762_file24.xlsx]

## Sheet: README
Human cytomegalovirus extensively re-organizes the human genome, diminishing TEAD1 transcription factor activity
This document contains differential binding of CTCF, H3K27ac and TEAD1 in Uninfected and HCMV infected cells in HFF as measured by DiffBind. ChIP-seq data were aligned to the hg19 genome.
Comments, additions, or subtractions should be addressed to the corresponding authors:
Leah Kottyan (Leah.Kottyan@cchmc.org)
Matt Weirauch (Matthew.Weirauch@cchmc.org)
Sheet name	Link
HCMV vs UI CTCF DESeq2 results	Go to sheet
HCMV vs UI H3K27ac DESeq2 results	Go to sheet
HCMV vs UI TEAD1 DESeq2 results	Go to sheet
HCMV closed CTCF	Go to sheet
HCMV opened CTCF	Go to sheet
Unchanged CTCF	Go to sheet
HCMV closed H3K27ac	Go to sheet
HCMV opened H3K27ac	Go to sheet
unchanged H3K27ac	Go to sheet
HCMV closed TEAD1	Go to sheet
HCMV opened TEAD1	Go to sheet
unchanged TEAD1	Go to sheet

## Sheet: HCMV_vs_UI_deseq2_CTCF
seqnames	start	end	width	strand	Conc	Conc_HCMV	Conc_UI	Log2FoldChange	p.value	FDR	CTCF_HCMV_Rep1	CTCF_HCMV_Rep2	CTCF_UI_Rep1	CTCF_UI_Rep2
chr2	11346	12062	717	*	8.28655	9.07275	6.42655	2.55532	5.46224e-60	3.69772e-55	582.72	494.23	94.27	77.76
chr15	22460971	22461961	991	*	8.38133	9.06366	7.04225	1.95448	1.11907e-44	3.78784e-40	571.09	499.1	135.34	128.27
chr17	72350137	72350622	486	*	7.24238	8.11794	4.64539	3.29482	2.21713e-42	5.00303e-38	302.41	253.2	25.2	24.85
chr14	107119740	107120456	717	*	7.70974	8.47314	5.9848	2.36757	6.32031e-41	1.06965e-36	369.87	340.85	68.14	58.52
chr11	134945511	134946070	560	*	7.77868	8.49867	6.27573	2.11705	5.39417e-36	7.30327e-32	384.99	338.42	81.21	73.75
chr11	189536	190372	837	*	9.68264	10.1173	9.0577	1.04148	1.88499e-31	2.12677e-27	1153.81	1067.6	542.3	523.48
chr13	53420217	53420725	509	*	7.22946	7.99262	5.50591	2.3152	1.75972e-28	1.7018e-24	275.66	233.73	53.2	37.68
chr14	106765015	106765665	651	*	7.40748	8.11731	5.95102	2.0372	3.64646e-28	3.08563e-24	281.47	273.9	64.4	59.32
chr2	105459449	105460003	555	*	7.01717	7.77185	5.34022	2.2368	2.31118e-25	1.73842e-21	207.04	230.07	40.14	40.88
chr6	148185	149041	857	*	8.12637	8.7135	7.11988	1.52308	2.85442e-25	1.93233e-21	452.45	387.11	130.68	147.51
chr22	48970841	48971352	512	*	7.35933	8.05205	5.97728	1.94153	7.47881e-25	4.6026e-21	286.13	244.68	63.47	62.53
chr4	11430340	11430889	550	*	6.48948	7.35891	3.95881	3.05671	1.29628e-24	7.31277e-21	190.75	137.56	15.87	15.23
chr16	49315886	49316529	644	*	7.22277	7.93717	5.74564	2.03646	3.41113e-24	1.77631e-20	269.84	220.34	56	51.31
chr1	237205138	237205718	581	*	6.30522	7.17402	3.78122	3.01453	4.71727e-23	2.281e-19	150.04	138.78	13.07	14.43
chr13	112717067	112717621	555	*	6.97617	7.72271	5.34236	2.18225	1.10581e-22	4.99057e-19	233.79	188.69	46.67	34.47
chr8	56013575	56014079	505	*	6.4568	7.30132	4.16583	2.79213	1.37774e-22	5.82923e-19	179.12	136.34	21.47	14.43
chr6	40296260	40296852	593	*	6.75709	7.51961	5.03713	2.24771	6.90244e-22	2.74863e-18	196.57	170.43	33.6	32.07
chr2	219867119	219868148	1030	*	8.20362	8.7253	7.37833	1.29347	2.28147e-21	8.58036e-18	435.01	411.46	165.21	167.55
chr8	55371866	55372532	667	*	6.77944	7.5449	5.04291	2.25764	3.58438e-21	1.2771e-17	214.01	159.47	35.47	30.46
chr7	71217052	71217638	587	*	7.01161	7.71299	5.59252	1.95159	5.09448e-21	1.72438e-17	216.34	203.29	47.6	48.9
chr12	14134870	14135401	532	*	6.47015	7.27447	4.4912	2.46177	1.59888e-20	5.15419e-17	173.3	136.34	23.33	21.64
chr17	71994685	71995216	532	*	6.84101	7.56669	5.31118	2.05791	4.55071e-20	1.33601e-16	196.57	182.6	45.74	33.67
chr2	16689436	16689918	483	*	6.60969	7.37699	4.8627	2.25335	4.61435e-20	1.33601e-16	180.28	152.17	31.74	26.45
chr10	102321665	102322251	587	*	7.95882	8.50163	7.07833	1.35879	4.73649e-20	1.33601e-16	379.18	345.72	137.21	133.08
chr14	99654901	99655345	445	*	5.936	6.85182	2.79498	3.58137	5.43459e-20	1.4716e-16	110.5	120.52	7.47	6.41
chr18	47721328	47721838	511	*	7.14371	7.8066	5.88097	1.78046	2.0676e-19	5.38339e-16	239.6	208.16	56.94	60.93
chr14	105633744	105634736	993	*	7.29382	7.93127	6.12385	1.68724	2.36413e-19	5.92749e-16	260.54	227.64	73.74	65.74
chr15	53489509	53489912	404	*	6.57574	7.32683	4.91799	2.1558	4.86005e-19	1.17502e-15	162.84	158.25	30.8	29.66
chr18	56936309	56936773	465	*	6.72426	7.44867	5.2005	2.03397	6.34192e-19	1.48042e-15	182.61	166.77	38.27	35.27
chr13	58207562	58208010	449	*	6.21125	7.0308	4.12284	2.5046	1.53691e-18	3.44861e-15	134.92	126.6	14	20.84
chr19	480107	480505	399	*	6.35521	7.14412	4.4781	2.34596	1.57922e-18	3.44861e-15	146.55	136.34	26.14	18.44
chr19	50831300	50832425	1126	*	7.58179	8.17792	6.54775	1.5345	2.90493e-18	6.14539e-15	318.69	260.51	104.54	82.57
chr4	596407	596864	458	*	6.66984	7.39345	5.14986	2.02202	3.47351e-18	7.12553e-15	176.79	159.47	37.34	33.67
chr5	180075640	180076251	612	*	6.69192	7.42126	5.1445	2.0433	4.76328e-18	9.48397e-15	193.08	149.73	35.47	35.27
chr22	33453932	33454601	670	*	6.72736	7.45513	5.18752	2.02982	7.90373e-18	1.52872e-14	201.22	149.73	33.6	39.28
chr2	99438908	99439806	899	*	6.96636	7.64325	5.64918	1.82405	1.04722e-17	1.96924e-14	223.32	176.51	52.27	48.1
chr8	99439817	99440391	575	*	6.62453	7.35081	5.09181	2.02371	1.44397e-17	2.64191e-14	177.96	148.51	34.54	33.67
chr8	139948313	139948838	526	*	6.12039	6.93454	4.07193	2.45678	1.93338e-17	3.37587e-14	131.43	113.21	16.8	16.83
chr17	43860522	43861020	499	*	7.17103	7.79672	6.04147	1.63031	1.94486e-17	3.37587e-14	226.81	217.9	70	61.73
chr13	53421102	53421454	353	*	6.64651	7.37558	5.10038	2.02916	2.23734e-17	3.71701e-14	187.26	144.86	31.74	36.88
chr17	71948785	71949263	479	*	6.22734	7.01972	4.32804	2.34061	2.25121e-17	3.71701e-14	125.62	133.91	23.33	16.83
chr4	3768775	3769590	816	*	6.8941	7.57765	5.55004	1.84252	2.35501e-17	3.79583e-14	212.85	169.21	44.8	48.9
chr15	27603897	27604408	512	*	6.6768	7.38297	5.23666	1.93496	4.37369e-17	6.88561e-14	176.79	157.04	40.14	35.27
chr11	116228671	116229271	601	*	6.91706	7.58031	5.65296	1.76603	4.68122e-17	7.20226e-14	197.73	185.03	54.14	46.5
chr14	24045244	24045828	585	*	6.5688	7.29239	5.04891	1.99958	7.10699e-17	1.06914e-13	168.65	144.86	31.74	34.47
chr7	98246080	98247127	1048	*	7.01474	7.67271	5.77052	1.74362	7.90217e-17	1.16292e-13	229.13	178.95	57.87	51.31
chr9	1042442	1042889	448	*	6.57309	7.31216	4.97754	2.05816	1.04208e-16	1.50096e-13	180.28	137.56	26.14	36.88
chr1	2738509	2738973	465	*	6.03027	6.8459	3.97098	2.44531	1.95129e-16	2.75197e-13	104.68	125.38	17.73	13.63
chr4	37245315	37245771	457	*	5.6869	6.57827	2.90165	3.0796	2.57961e-16	3.56386e-13	104.68	86.43	9.33	5.61
chr20	21683558	21684016	459	*	6.30569	7.06733	4.59055	2.15684	3.05924e-16	4.14196e-13	147.72	120.52	23.33	24.85
chr8	139926511	139927073	563	*	5.76999	6.64568	3.17156	2.87777	3.48805e-16	4.62995e-13	117.48	82.78	8.4	9.62
chr3	27762983	27764006	1024	*	7.72528	8.2468	6.90039	1.27447	4.63563e-16	6.03488e-13	311.72	295.81	119.47	119.45
chr3	13921859	13922526	668	*	7.62139	8.16139	6.74844	1.32957	6.36723e-16	8.13276e-13	303.57	269.03	103.61	111.43
chr5	140305841	140306544	704	*	7.22733	7.82874	6.17683	1.53007	6.96548e-16	8.73213e-13	247.74	206.95	70.94	73.75
chr10	133110723	133111127	405	*	5.92074	6.7398	3.83605	2.43978	1.10388e-15	1.3587e-12	115.15	98.6	14.93	13.63
chr1	38511801	38512367	567	*	5.89235	6.71679	3.76674	2.47829	1.37291e-15	1.65965e-12	109.33	101.04	16.8	10.42
chr19	36449881	36450568	688	*	7.31513	7.89852	6.31983	1.46918	1.40385e-15	1.66728e-12	260.54	216.68	81.21	78.56
chr22	48972538	48972955	418	*	6.52131	7.23019	5.0691	1.91705	2.18202e-15	2.5468e-12	165.16	135.12	32.67	34.47
chr4	8875611	8876108	498	*	5.98294	6.78066	4.04866	2.31606	2.6447e-15	3.0345e-12	113.99	105.91	18.67	14.43
chr11	47638517	47639026	510	*	6.28864	4.49916	7.06325	-2.19532	2.94057e-15	3.28829e-12	22.1	23.13	140.01	127.46
chr19	30713214	30713752	539	*	6.92373	7.56504	5.74016	1.6677	2.96303e-15	3.28829e-12	205.87	172.86	58.8	48.1
chr7	31375932	31376527	596	*	6.38473	7.10808	4.86597	1.97833	3.30613e-15	3.60987e-12	139.57	136.34	32.67	25.65
chr1	2375154	2375728	575	*	7.0097	7.63179	5.89221	1.5983	3.47065e-15	3.72935e-12	212.85	183.82	63.47	55.31
chr2	70995129	70995689	561	*	6.79755	7.46621	5.51271	1.75417	4.13349e-15	4.3722e-12	195.4	158.25	39.2	52.11
chr17	72280751	72281279	529	*	5.66639	6.52714	3.22422	2.68477	4.29512e-15	4.41666e-12	90.72	93.73	7.47	11.22
chr8	56433440	56433878	439	*	6.27101	7.02196	4.61402	2.09484	4.30601e-15	4.41666e-12	143.06	116.86	28.94	20.04
chr7	26416572	26417050	479	*	7.14843	7.75487	6.08203	1.53705	5.13853e-15	5.19191e-12	238.44	193.55	62.54	72.95
chr1	30705050	30705564	515	*	6.59576	7.28602	5.22401	1.83694	5.7316e-15	5.70597e-12	172.14	139.99	35.47	39.28
chr19	59117548	59118189	642	*	7.23707	7.81191	6.26702	1.43655	7.09808e-15	6.96394e-12	230.3	219.12	80.27	73.75
chr2	186603466	186604090	625	*	7.83134	8.32749	7.06904	1.19312	9.92606e-15	9.59935e-12	345.45	297.03	136.28	132.27
chr4	57687532	57688047	516	*	5.95585	6.7565	4.00198	2.28748	1.58083e-14	1.50727e-11	113.99	102.26	11.2	20.84
chr13	53312864	53313728	865	*	7.40968	7.971	6.47838	1.3888	1.62643e-14	1.52921e-11	281.47	220.34	87.74	90.59
chr1	91194979	91195430	452	*	6.93427	7.55615	5.81749	1.58582	1.82122e-14	1.6889e-11	203.55	172.86	55.07	57.72
chr6	39197109	39197689	581	*	7.01615	7.62656	5.93699	1.54761	2.24729e-14	2.05584e-11	217.5	177.73	61.6	60.93
chr17	72353337	72353646	310	*	5.39846	6.32586	2.04964	3.40135	2.65206e-14	2.39378e-11	83.74	76.69	1.87	6.41
chr9	137874859	137875356	498	*	5.90325	6.69418	4.01329	2.25201	2.94716e-14	2.62515e-11	101.19	105.91	18.67	13.63
chr19	33668218	33668785	568	*	7.4294	7.96532	6.56726	1.3099	3.23975e-14	2.84615e-11	245.42	254.42	99.87	89.79
chr4	185021427	185021843	417	*	6.53313	7.21386	5.2005	1.79316	3.27936e-14	2.84615e-11	159.35	137.56	38.27	35.27
chr19	51111267	51111793	527	*	6.86452	7.48702	5.74564	1.58641	4.39157e-14	3.75676e-11	189.59	169.21	56	51.31
chr10	118386854	118387608	755	*	6.96618	7.5709	5.90523	1.52476	4.43957e-14	3.75676e-11	198.89	181.38	59.74	60.12
chr10	71906071	71906641	571	*	7.2463	6.24557	7.83151	-1.45879	4.73385e-14	3.95633e-11	87.23	64.52	223.08	232.48
chr10	23481512	23482131	620	*	5.67206	6.51246	3.41676	2.49673	5.29927e-14	4.37487e-11	104.68	77.91	9.33	12.02
chr12	39539158	39539591	434	*	6.75395	7.39577	5.56852	1.64286	6.11862e-14	4.99043e-11	165.16	171.64	42	52.91
chr11	61334811	61335429	619	*	7.54842	8.06835	6.72759	1.25997	6.27959e-14	5.01e-11	287.29	249.55	110.14	101.81
chr13	53775246	53775723	478	*	7.03623	7.62627	6.02088	1.47708	6.29063e-14	5.01e-11	193.08	202.08	68.14	61.73
chr17	33219756	33220294	539	*	6.71758	7.36201	5.5229	1.65996	7.3262e-14	5.76692e-11	175.63	153.38	49.47	42.49
chr17	71837808	71838224	417	*	5.63382	6.46753	3.43445	2.45605	7.8388e-14	6.09948e-11	94.21	82.78	11.2	10.42
chr19	42210514	42211203	690	*	8.20431	8.64442	7.56785	1.02956	8.5276e-14	6.56005e-11	432.68	367.63	189.48	189.99
chr5	5886969	5887513	545	*	6.46074	7.14356	5.11964	1.79475	1.03969e-13	7.90821e-11	148.88	133.91	38.27	31.26
chr1	248020585	248021164	580	*	5.64612	6.47698	3.46992	2.42282	1.1368e-13	8.55074e-11	95.38	82.78	9.33	12.83
chr16	55357395	55358084	690	*	7.48403	8.0124	6.64159	1.28053	1.20155e-13	8.93846e-11	281.47	234.94	97.07	102.61
chr14	106465342	106466208	867	*	6.86618	7.49656	5.72063	1.59649	1.48701e-13	1.09418e-10	190.75	170.43	42.94	62.53
chr20	62947819	62948369	551	*	6.60866	7.2693	5.35442	1.70763	1.55111e-13	1.12907e-10	170.98	137.56	40.14	41.69
chr8	143069906	143070308	403	*	5.32287	6.23862	2.18297	3.13715	1.75903e-13	1.2668e-10	76.77	74.26	1.87	7.21
chr18	13003318	13004020	703	*	6.70619	5.47874	7.35964	-1.67903	2.30491e-13	1.64246e-10	45.36	43.82	168.94	159.53
chr18	70209085	70209485	401	*	5.77669	6.59532	3.69518	2.32737	3.00229e-13	2.11712e-10	108.17	85.21	7.47	18.44
chr9	29212039	29212581	543	*	7.41933	7.94788	6.57643	1.27956	3.5559e-13	2.48165e-10	269.84	223.99	97.07	93.79
chr10	134910401	134910801	401	*	5.80562	6.59774	3.90799	2.22682	3.66799e-13	2.53376e-10	101.19	92.52	19.6	10.42
chr1	2792425	2792857	433	*	5.64272	6.45023	3.64159	2.27433	6.36631e-13	4.35327e-10	87.23	87.65	12.13	12.83
chr18	75362738	75363129	392	*	6.27187	6.96937	4.8695	1.82564	6.81178e-13	4.6113e-10	133.76	116.86	28	30.46
chr7	8476476	8476931	456	*	6.75811	7.3839	5.6282	1.57299	6.95496e-13	4.66161e-10	172.14	161.9	42	56.92
chr5	3602951	3603573	623	*	6.49445	7.1573	5.23183	1.69819	7.35833e-13	4.88362e-10	143.06	142.43	32.67	42.49
chr1	92295720	92296429	710	*	6.25456	4.74235	6.97653	-1.91504	8.41783e-13	5.53256e-10	26.75	26.78	126.01	125.86
chr2	240609749	240610185	437	*	5.9458	6.6985	4.27951	2.03425	8.76844e-13	5.70758e-10	113.99	93.73	19.6	19.24
chr10	123368069	123368619	551	*	7.35523	7.87553	6.53346	1.25018	9.10204e-13	5.8683e-10	239.6	230.07	91.47	93.79
chr3	68981533	68982093	561	*	5.80388	6.57868	4.01329	2.12553	1.23769e-12	7.90437e-10	103.52	87.65	18.67	13.63
chr2	231789077	231789609	533	*	5.46832	6.30379	3.25441	2.40778	1.31392e-12	8.31284e-10	83.74	74.26	10.27	8.82
chr16	26656910	26657298	389	*	5.51755	6.3447	3.37079	2.35487	1.61568e-12	1.01273e-09	90.72	71.82	10.27	10.42
chr4	85403897	85404587	691	*	7.0373	7.61784	6.05046	1.42544	1.75081e-12	1.08169e-09	216.34	176.51	58.8	73.75
chr19	49925540	49926047	508	*	7.08844	7.64997	6.15653	1.37607	1.75766e-12	1.08169e-09	209.36	192.34	79.34	63.33
chr5	101631644	101632314	671	*	6.11747	6.85265	4.54138	1.96597	1.85506e-12	1.13135e-09	133.76	97.39	28.94	17.64
chr10	69548178	69548660	483	*	6.54601	7.20012	5.31616	1.66978	1.87313e-12	1.13217e-09	167.49	126.6	42	37.68
chr11	134230072	134230563	492	*	6.95435	7.53778	5.95894	1.43541	1.9433e-12	1.16419e-09	201.22	170.43	57.87	66.54
chr17	72085970	72086423	454	*	6.6543	7.28114	5.52083	1.57871	2.02552e-12	1.2028e-09	168.65	142.43	48.54	43.29
chr5	1011249	1011589	341	*	6.1374	6.8609	4.6179	1.919	2.22992e-12	1.31217e-09	131.43	101.04	29.87	19.24
chr22	49700986	49701443	458	*	5.92659	6.66812	4.31854	1.98042	2.24846e-12	1.31217e-09	102.35	101.04	21.47	18.44
chr22	46658354	46659204	851	*	6.43935	7.09443	5.20588	1.66351	3.03046e-12	1.75342e-09	143.06	130.25	34.54	39.28
chr9	104500324	104501209	886	*	6.16266	6.8594	4.76354	1.80621	3.85957e-12	2.21422e-09	110.5	121.73	27.07	27.26
chr18	48033454	48033920	467	*	6.28634	6.96423	4.96517	1.73615	4.13829e-12	2.35417e-09	126.78	122.95	28	34.47
chr20	5297411	5297915	505	*	5.72527	6.497	3.95268	2.08443	4.29495e-12	2.42292e-09	94.21	86.43	14.93	16.03
chr11	131116504	131116941	438	*	6.10004	6.80947	4.64539	1.85038	4.6973e-12	2.62038e-09	123.29	101.04	25.2	24.85
chr21	32931174	32931577	404	*	5.68788	6.47917	3.79557	2.15173	4.72238e-12	2.62038e-09	89.56	88.86	9.33	18.44
chr21	38065115	38065860	746	*	6.00364	6.72475	4.49542	1.8945	4.89422e-12	2.69365e-09	110.5	101.04	24.27	20.84
chr1	2718147	2718561	415	*	5.4336	6.26854	3.22422	2.35821	5.39459e-12	2.9451e-09	87.23	66.95	7.47	11.22
chr7	51383963	51384499	537	*	5.76709	6.53242	4.03133	2.0547	5.75389e-12	3.11612e-09	102.35	82.78	15.87	16.83
chr9	133884214	133884997	784	*	7.23387	7.77014	6.37079	1.29031	6.81809e-12	3.66315e-09	244.26	192.34	82.14	83.37
chr1	17033817	17034176	360	*	6.91799	7.48746	5.96351	1.38699	7.42226e-12	3.95636e-09	187.26	171.64	60.67	64.13
chr10	130066261	130066719	459	*	5.84461	6.58865	4.22379	1.97313	7.94221e-12	4.17946e-09	101.19	91.3	20.53	16.83
chr7	149484579	149484995	417	*	6.05855	6.7771	4.56233	1.87433	7.96428e-12	4.17946e-09	125.62	93.73	22.4	24.85
chr6	32081656	32082045	390	*	6.25915	4.86393	6.95498	-1.79417	8.72672e-12	4.54434e-09	30.24	28	122.27	125.86
chr22	25729439	25730447	1009	*	6.97738	7.5382	6.04747	1.35778	1.16883e-11	6.04009e-09	198.89	172.86	62.54	69.74
chr7	149487053	149487607	555	*	7.29763	7.80582	6.50609	1.20841	1.19477e-11	6.12737e-09	218.67	228.86	95.21	86.58
chr12	108306067	108306870	804	*	7.2681	7.80039	6.41546	1.27587	1.39154e-11	7.08283e-09	254.72	191.12	84.94	85.78
chr5	138728121	138728679	559	*	7.28412	7.79241	6.49235	1.20574	1.45972e-11	7.3744e-09	229.13	214.25	88.67	91.39
chr9	96588549	96588926	378	*	6.61534	7.24314	5.47865	1.55529	1.65179e-11	8.28291e-09	159.35	143.64	35.47	53.71
chr18	35358436	35359006	571	*	6.77267	7.36591	5.74756	1.45422	1.68372e-11	8.38094e-09	182.61	147.3	51.34	56.12
chr7	64348404	64348900	497	*	6.48653	7.1185	5.33552	1.57433	1.72816e-11	8.53937e-09	148.88	129.04	38.27	42.49
chr9	112415254	112415653	400	*	5.33228	2.25123	6.24442	-2.89592	1.88883e-11	9.26565e-09	4.65	4.87	74.67	76.96
chr14	37116277	37116734	458	*	5.94147	6.67176	4.38943	1.90069	2.10738e-11	1.02634e-08	117.48	86.43	18.67	23.25
chr1	18436614	18437227	614	*	6.42926	7.07445	5.23183	1.61155	2.16163e-11	1.04524e-08	145.39	124.17	32.67	42.49
chr5	45696279	45696903	625	*	7.3483	7.85173	6.56844	1.18917	2.17893e-11	1.04614e-08	247.74	214.25	89.61	100.21
chr18	59992193	59992935	743	*	7.36874	7.88256	6.56325	1.22188	2.20271e-11	1.0501e-08	268.68	203.29	96.14	92.99
chr6	119399072	119400255	1184	*	7.12874	7.65589	6.28947	1.25587	2.2863e-11	1.08233e-08	200.06	203.29	74.67	81.77
chr12	561985	562362	378	*	6.50481	7.12565	5.3915	1.53961	2.63272e-11	1.23767e-08	145.39	133.91	43.87	40.08
chr10	85996937	85997424	488	*	6.38884	7.03512	5.18752	1.6141	3.05741e-11	1.42741e-08	144.23	118.08	33.6	39.28
chr6	167764760	167765241	482	*	6.57659	7.20528	5.43683	1.55866	3.17813e-11	1.46934e-08	170.98	124.17	40.14	46.5
chr18	31804951	31805303	353	*	5.32684	6.15374	3.18207	2.28084	3.19064e-11	1.46934e-08	79.09	63.3	9.33	8.82
chr14	104808189	104808687	499	*	6.47162	7.10553	5.31398	1.57295	3.23388e-11	1.47919e-08	150.04	125.38	35.47	44.09
chr5	75370350	75370725	376	*	5.51332	6.30379	3.62628	2.1141	3.54499e-11	1.61062e-08	83.74	74.26	10.27	14.43
chr1	5805779	5806297	519	*	7.34482	7.83764	6.59047	1.16087	3.6859e-11	1.66347e-08	239.6	217.9	98.94	93.79
chr13	96204607	96205253	647	*	6.26333	6.92043	5.02234	1.651	4.32761e-11	1.94014e-08	130.27	111.99	34.54	30.46
chr1	179555386	179555897	512	*	7.03264	7.57827	6.14461	1.30504	4.85356e-11	2.16162e-08	209.36	172.86	65.34	76.16
chr3	181413120	181413528	409	*	5.97206	6.68072	4.52083	1.81846	5.36604e-11	2.37425e-08	116.31	88.86	24.27	21.64
chr22	22011492	22012033	542	*	6.30802	6.9745	5.03158	1.66829	5.65892e-11	2.48757e-08	140.74	110.78	26.14	39.28
chr3	122640580	122641515	936	*	6.47658	7.11541	5.30178	1.58489	5.84998e-11	2.54778e-08	161.67	115.65	36.4	42.49
chr18	21656218	21656648	431	*	6.59463	5.49829	7.21032	-1.51452	5.87115e-11	2.54778e-08	45.36	45.04	150.28	145.9
chr6	168770940	168771460	521	*	5.75293	6.48811	4.17683	1.90383	6.19531e-11	2.67132e-08	91.89	87.65	17.73	18.44
chr19	35738653	35739121	469	*	5.76712	6.5041	4.18207	1.9106	6.94024e-11	2.96845e-08	101.19	80.34	18.67	17.64
chr11	2291026	2291762	737	*	6.37808	7.01021	5.22655	1.56345	6.9721e-11	2.96845e-08	136.08	121.73	36.4	38.48
chr17	32473451	32473867	417	*	6.21922	6.87826	4.97098	1.65405	7.40065e-11	3.12707e-08	123.29	111.99	35.47	27.26
chr7	302720	303054	335	*	6.816	7.40155	5.81426	1.41673	7.43705e-11	3.12707e-08	188.43	149.73	47.6	64.93
chr7	31091814	31092301	488	*	6.09058	6.78402	4.70552	1.76419	7.97697e-11	3.33339e-08	129.11	91.3	28.94	23.25
chr4	101017104	101017556	453	*	6.66944	5.60316	7.27584	-1.48193	8.4055e-11	3.49091e-08	55.83	41.39	151.21	158.73
chr11	30038456	30038851	396	*	5.10376	5.96266	2.6798	2.40236	8.87404e-11	3.66303e-08	66.3	58.43	5.6	7.21
chr16	20359603	20360101	499	*	5.27267	6.09529	3.16098	2.22436	8.97653e-11	3.68288e-08	69.79	66.95	7.47	10.42
chr7	28995585	28996875	1291	*	8.37142	8.75293	7.85126	0.861495	1.39505e-10	5.6891e-08	475.72	387.11	222.15	239.7
chr10	118922513	118922954	442	*	6.37021	7.00899	5.19554	1.57213	1.44187e-10	5.84485e-08	140.74	116.86	30.8	42.49
chr1	18561237	18561751	515	*	6.72166	7.31743	5.68872	1.45459	1.4786e-10	5.95807e-08	181.45	137.56	60.67	42.49
chr14	29243522	29244006	485	*	6.14536	6.80652	4.88915	1.64451	1.50993e-10	6.0483e-08	107.01	116.86	28	31.26
chr12	119417555	119418020	466	*	6.36528	6.98993	5.23918	1.53582	1.86983e-10	7.44587e-08	134.92	119.3	41.07	34.47
chr3	62859115	62860070	956	*	5.87903	6.58621	4.43445	1.79333	1.96439e-10	7.77668e-08	108.17	84	22.4	20.84
chr17	71591654	71592109	456	*	6.35623	6.9827	5.22401	1.53498	2.04154e-10	8.02858e-08	136.08	116.86	35.47	39.28
chrX	2532924	2533357	434	*	6.04284	4.56162	6.75813	-1.81233	2.05174e-10	8.02858e-08	31.4	15.83	113.87	102.61
chr17	72732763	72733238	476	*	6.54217	7.13762	5.51027	1.44724	2.07077e-10	8.05649e-08	147.72	133.91	49.47	41.69
chr1	183287594	183288057	464	*	6.39017	5.22799	7.02538	-1.56288	2.09857e-10	8.11798e-08	37.22	37.74	130.68	129.87
chr1	1977877	1978250	374	*	6.84061	7.39252	5.93544	1.3171	2.12891e-10	8.18858e-08	181.45	154.6	60.67	61.73
chr6	113735686	113736106	421	*	6.08079	4.71066	6.77067	-1.73463	2.17724e-10	8.32713e-08	25.59	26.78	104.54	113.84
chr17	37427217	37427666	450	*	5.51935	3.56657	6.31983	-2.11108	2.35095e-10	8.94101e-08	13.96	9.74	81.21	78.56
chr2	171573147	171573785	639	*	7.38813	7.86652	6.66746	1.1105	2.38564e-10	9.02224e-08	250.07	216.68	94.27	109.03
chr7	154585831	154586246	416	*	5.45457	6.24454	3.57069	2.06632	2.42579e-10	9.12312e-08	89.56	62.08	9.33	14.43
chr17	77898010	77898662	653	*	7.203	7.69944	6.44003	1.16264	2.648e-10	9.9038e-08	222.16	193.55	88.67	84.98
chr1	92951162	92951846	685	*	6.88049	7.45446	5.913	1.38502	2.82016e-10	1.04897e-07	204.71	146.08	70	50.5
chr11	72300826	72301379	554	*	7.13072	7.63316	6.35326	1.17601	2.99113e-10	1.10649e-07	204.71	192.34	79.34	84.17
chrX	37003340	37003736	397	*	5.21886	6.0314	3.18207	2.15389	3.05811e-10	1.12512e-07	66.3	64.52	9.33	8.82
chr1	210048825	210049310	486	*	5.73	3.99267	6.4956	-1.97557	3.10015e-10	1.13442e-07	22.1	9.74	85.87	94.6
chr18	5890344	5891082	739	*	7.44356	7.91268	6.74394	1.08677	3.16049e-10	1.15028e-07	264.03	217.9	104.54	109.83
chr17	4064362	4064860	499	*	5.58638	3.77336	6.36493	-2.0237	3.26029e-10	1.18026e-07	13.96	13.39	83.07	81.77
chr16	24082090	24082630	541	*	5.80636	6.52205	4.3233	1.81571	3.31231e-10	1.19271e-07	104.68	79.13	22.4	17.64
chr16	88343531	88343861	331	*	5.30499	6.11794	3.26518	2.13568	3.58633e-10	1.28455e-07	75.6	63.3	5.6	13.63
chr8	10589883	10590512	630	*	6.17243	6.81866	4.97124	1.58867	3.71771e-10	1.32113e-07	118.64	107.12	29.87	32.87
chr19	53811522	53812124	603	*	6.30389	6.93358	5.16075	1.54043	3.72748e-10	1.32113e-07	134.92	109.56	35.47	36.07
chr18	34846254	34846657	404	*	5.86107	6.56308	4.43921	1.75665	3.93933e-10	1.38894e-07	95.38	93.73	17.73	25.65
chr17	6797327	6797905	579	*	6.67307	7.2381	5.73125	1.35073	4.15517e-10	1.45745e-07	155.86	146.08	54.14	52.11
chr4	6009718	6010243	526	*	5.86029	6.56822	4.41231	1.77568	4.28555e-10	1.49543e-07	107.01	82.78	17.73	24.85
chr20	30605596	30606000	405	*	4.9578	5.82143	2.48697	2.36513	4.51984e-10	1.5691e-07	54.67	58.43	5.6	5.61
chr1	10969937	10970465	529	*	6.98165	7.50422	6.1541	1.2269	4.55123e-10	1.57194e-07	175.63	187.47	66.27	76.16
chr7	30721856	30722578	723	*	6.46081	7.06165	5.41211	1.45136	4.67038e-10	1.6049e-07	144.23	122.95	41.07	44.09
chr19	1285501	1286338	838	*	6.19971	6.84182	5.01329	1.58118	4.74653e-10	1.62283e-07	118.64	110.78	37.34	27.26
chr8	57350243	57350813	571	*	6.54404	7.12705	5.54987	1.40269	5.11634e-10	1.74048e-07	139.57	139.99	50.4	43.29
chr4	142296937	142297421	485	*	5.9705	4.54252	6.67391	-1.7652	5.2433e-10	1.77475e-07	18.61	28	106.41	97.8
chr22	22901450	22901956	507	*	6.96015	7.48234	6.13359	1.22791	5.27403e-10	1.77627e-07	188.43	169.21	69.07	71.35
chr3	10814246	10814805	560	*	6.19305	6.8716	4.86922	1.69132	5.32207e-10	1.78358e-07	146.55	87.65	33.6	24.85
chr8	140659083	140659520	438	*	6.48665	7.08499	5.44577	1.43785	5.72609e-10	1.90952e-07	129.11	142.43	38.27	48.9
chr22	49339632	49339962	331	*	5.12449	5.95952	2.91431	2.23594	5.8665e-10	1.94676e-07	72.11	52.35	10.27	4.81
chr20	35220621	35221149	529	*	5.42267	3.42116	6.23024	-2.1123	6.06611e-10	2.00318e-07	10.47	10.96	81.21	68.94
chr16	55866785	55867299	515	*	5.26565	2.93898	6.11417	-2.27386	6.27559e-10	2.06229e-07	10.47	4.87	72.8	65.74
chr17	32846255	32846730	476	*	6.34312	6.95718	5.25213	1.48398	6.64045e-10	2.17165e-07	126.78	121.73	34.54	41.69
chr11	103480136	103480732	597	*	6.60726	5.57234	7.20367	-1.43337	7.10082e-10	2.31104e-07	47.69	47.48	163.34	131.47
chr12	111470956	111471415	460	*	5.85953	6.5521	4.4781	1.73103	7.14758e-10	2.31513e-07	100.03	87.65	26.14	18.44
chr17	73584181	73584621	441	*	6.18573	6.83738	4.96491	1.60231	7.26176e-10	2.34091e-07	133.76	94.95	33.6	28.86
chr20	22567272	22567748	477	*	6.58489	7.18128	5.55004	1.43446	7.50656e-10	2.40836e-07	170.98	119.3	44.8	48.9
chr17	77785055	77785653	599	*	7.33316	7.80608	6.62499	1.09619	7.59187e-10	2.42424e-07	243.09	204.51	103.61	93.79
chr12	113573365	113573907	543	*	6.91029	7.44206	6.05904	1.25157	7.81618e-10	2.48415e-07	190.75	157.04	64.4	68.94
chr16	5666016	5666530	515	*	6.24071	6.87693	5.075	1.5464	7.90571e-10	2.50086e-07	127.94	107.12	28.94	38.48
chr3	192127329	192128220	892	*	5.75027	6.47302	4.23436	1.81354	8.42413e-10	2.65247e-07	105.84	71.82	16.8	20.84
chr17	75524587	75525160	574	*	5.85169	6.5496	4.44757	1.74346	8.96658e-10	2.81019e-07	107.01	80.34	25.2	18.44
chr10	102586384	102587063	680	*	5.86264	6.54564	4.52083	1.69275	9.13753e-10	2.85057e-07	91.89	94.95	24.27	21.64
chr4	2443189	2444090	902	*	7.93023	8.34716	7.34149	0.945871	9.99361e-10	3.10334e-07	365.22	286.07	151.21	173.16
chr15	62910519	62911029	511	*	5.38876	3.42116	6.19143	-2.07904	1.04559e-09	3.23207e-07	10.47	10.96	70	76.16
chr17	45924606	45925526	921	*	7.22207	7.71038	6.47838	1.1331	1.05472e-09	3.24548e-07	232.62	186.25	87.74	90.59
chr5	10987988	10988519	532	*	7.09262	7.58865	6.3306	1.15556	1.07438e-09	3.29101e-07	202.38	182.6	84.01	76.96
chr2	231902103	231903139	1037	*	6.32375	6.93422	5.24442	1.47091	1.20551e-09	3.67605e-07	132.6	111.99	37.34	38.48
chr7	20824302	20824903	602	*	6.18815	6.83277	4.9928	1.56269	1.31275e-09	3.98332e-07	123.29	104.69	25.2	38.48
chr12	131937075	131937488	414	*	6.31931	6.93947	5.20823	1.50312	1.31804e-09	3.98332e-07	139.57	105.91	41.07	32.87
chr17	79869469	79869823	355	*	5.37197	6.13499	3.64918	1.93641	1.38066e-09	4.15401e-07	66.3	74.26	13.07	12.02
chr2	99552533	99553209	677	*	5.83807	6.53893	4.4212	1.73617	1.42201e-09	4.25947e-07	110.5	75.47	19.6	23.25
chr12	52513758	52514134	377	*	6.62284	7.18505	5.68903	1.33099	1.44665e-09	4.3142e-07	154.69	136.34	49.47	53.71
chr22	29876584	29877358	775	*	5.71309	6.42683	4.23897	1.78615	1.4732e-09	4.37412e-07	95.38	76.69	23.33	14.43
chr10	26223761	26224204	444	*	5.1682	5.97356	3.18207	2.07752	1.52222e-09	4.49991e-07	72.11	53.56	9.33	8.82
chr11	15651232	15651592	361	*	5.13298	5.94724	3.08367	2.10024	1.54916e-09	4.5552e-07	68.62	54.78	6.53	10.42
chr10	106400196	106400487	292	*	5.21318	6.01307	3.26434	2.06216	1.55839e-09	4.5552e-07	75.6	53.56	11.2	8.02
chr19	41018497	41019470	974	*	6.10665	6.74763	4.92426	1.56029	1.56395e-09	4.5552e-07	116.31	98.6	32.67	28.06
chr5	3599827	3600145	319	*	4.96415	5.80792	2.6798	2.21567	1.56784e-09	4.5552e-07	51.18	60.87	5.6	7.21
chr21	38623224	38623604	381	*	5.78203	4.29463	6.49867	-1.78295	1.67486e-09	4.84536e-07	19.77	19.48	94.27	86.58
chr19	10624832	10625313	482	*	5.93834	6.61297	4.63012	1.65102	1.73748e-09	4.99877e-07	109.33	86.43	21.47	28.06
chr4	47034553	47035097	545	*	6.62915	7.19494	5.68519	1.34278	1.74266e-09	4.99877e-07	164	129.04	53.2	49.7
chr7	149496798	149497399	602	*	6.06394	6.71382	4.84958	1.57908	2.0523e-09	5.86212e-07	118.64	91.3	28	29.66
chr14	107287385	107287831	447	*	5.73357	6.44396	4.27461	1.75997	2.08064e-09	5.91811e-07	103.52	70.6	18.67	20.04
chr1	32421655	32422092	438	*	5.33141	3.329	6.13911	-2.07103	2.10191e-09	5.93217e-07	12.79	7.3	67.2	73.75
chr11	17741618	17742558	941	*	6.91432	7.44989	6.05308	1.2601	2.10311e-09	5.93217e-07	202.38	147.3	71.87	60.93
chr4	20420511	20420849	339	*	5.25787	3.05859	6.09157	-2.16585	2.14937e-09	6.0375e-07	8.14	8.52	80.27	56.12
chr4	187475606	187476959	1354	*	7.09217	7.59097	6.3235	1.15697	2.21463e-09	6.19512e-07	215.18	170.43	78.41	81.77
chr17	35014477	35014984	508	*	5.72552	6.43182	4.28481	1.73747	2.28193e-09	6.3571e-07	82.58	90.08	14.93	24.05
chr11	113258320	113258956	637	*	6.56627	7.12733	5.6357	1.3263	2.31803e-09	6.43121e-07	138.41	141.21	51.34	48.1
chr5	176513882	176514490	609	*	7.35036	7.80084	6.6918	1.02953	2.4495e-09	6.76821e-07	225.65	220.34	101.74	105.02
chr7	70596389	70596793	405	*	4.71686	5.62032	1.76733	2.48877	2.4854e-09	6.83949e-07	56.99	41.39	2.8	4.01
chr9	38017314	38017741	428	*	5.84769	6.52587	4.52532	1.65424	2.54824e-09	6.98403e-07	94.21	90.08	19.6	26.45
chr1	2928982	2929588	607	*	6.56781	7.14645	5.5866	1.3715	2.56921e-09	6.98893e-07	162.84	120.52	44.8	51.31
chr10	23462187	23462897	711	*	5.42376	6.1852	3.70978	1.90422	2.57068e-09	6.98893e-07	63.97	81.56	9.33	16.83
chr10	133110088	133110404	317	*	4.94368	5.78508	2.6798	2.18335	2.7463e-09	7.43655e-07	62.81	47.48	5.6	7.21
chr16	87984370	87984747	378	*	6.35974	6.96046	5.31138	1.43524	2.83176e-09	7.63741e-07	140.74	108.34	40.14	39.28
chr4	187542822	187543412	591	*	6.11683	4.86259	6.77747	-1.60278	2.9162e-09	7.83394e-07	31.4	26.78	123.21	96.2
chr9	136150327	136150956	630	*	5.83844	6.51759	4.51217	1.66777	3.02001e-09	8.08074e-07	90.72	92.52	28	17.64
chr5	134870698	134871322	625	*	6.0261	6.67482	4.81595	1.56533	3.10229e-09	8.26822e-07	108.17	96.17	24.27	32.07
chr11	60534743	60535238	496	*	6.66754	7.21386	5.77761	1.2836	3.14387e-09	8.34618e-07	159.35	137.56	56	53.71
chr15	84326346	84326670	325	*	5.28727	6.058	3.52048	1.94722	3.23709e-09	8.56008e-07	66.3	66.95	14.93	8.02
chr19	12936292	12936829	538	*	6.8171	7.3777	5.88782	1.31254	3.25065e-09	8.5625e-07	176.79	155.82	43.87	74.55
chr21	41758217	41758623	407	*	6.63315	7.1944	5.70203	1.32215	3.39243e-09	8.90133e-07	166.33	126.6	50.4	53.71
chr19	22805788	22806250	463	*	5.055	5.86326	3.04866	2.06164	3.52835e-09	9.19589e-07	61.65	54.78	9.33	7.21
chr5	136537520	136537966	447	*	6.10989	4.89509	6.75989	-1.57104	3.53187e-09	9.19589e-07	29.08	30.43	115.74	101.01
chr7	27169600	27170150	551	*	6.67216	7.2195	5.77949	1.28188	3.62384e-09	9.39921e-07	160.51	137.56	51.34	58.52
chr7	44283892	44284286	395	*	6.68975	7.23202	5.81074	1.2663	4.00946e-09	1.03597e-06	157.02	143.64	51.34	60.93
chr22	40018825	40019364	540	*	6.85752	7.37723	6.03725	1.20687	4.06248e-09	1.04568e-06	179.12	153.38	61.6	69.74
chr1	150894790	150895350	561	*	6.56931	5.58661	7.14846	-1.36666	4.17814e-09	1.07138e-06	53.5	42.61	153.08	130.67
chr21	36094876	36095530	655	*	6.71669	7.25391	5.85109	1.25901	4.26169e-09	1.088e-06	162.84	142.43	62.54	52.91
chr5	86365800	86366220	421	*	5.6543	4.05153	6.3948	-1.83222	4.2751e-09	1.088e-06	19.77	13.39	96.14	72.15
chr13	49794077	49794864	788	*	7.11171	7.59985	6.36839	1.12724	4.4979e-09	1.13078e-06	216.34	171.64	85.87	79.36
chr16	4986162	4986754	593	*	6.50024	7.06821	5.55004	1.33708	4.50652e-09	1.13078e-06	144.23	124.17	44.8	48.9
chr3	13503005	13503550	546	*	7.23406	7.69577	6.55097	1.05782	4.50821e-09	1.13078e-06	218.67	195.99	96.14	91.39
chr7	68532346	68532780	435	*	5.00614	5.84129	2.79498	2.14497	4.51002e-09	1.13078e-06	73.28	41.39	7.47	6.41
chr7	127992060	127992687	628	*	7.58667	8.00475	6.99559	0.943656	4.53403e-09	1.1326e-06	261.7	251.99	121.34	133.88
chrX	16762141	16762579	439	*	5.10737	2.83619	5.94961	-2.16706	4.68782e-09	1.16672e-06	6.98	7.3	57.87	65.74
chr11	126498455	126499025	571	*	5.85545	4.46512	6.55013	-1.70057	4.72636e-09	1.16913e-06	18.61	25.56	84.01	103.41
chr19	57349260	57349867	608	*	5.66471	6.3652	4.24942	1.71607	4.73206e-09	1.16913e-06	93.05	71.82	19.6	18.44
chr17	6323637	6324056	420	*	6.38661	6.98208	5.35462	1.40821	4.86197e-09	1.19686e-06	138.41	114.43	34.54	47.3
chr13	102568646	102569186	541	*	6.0924	6.73192	4.91511	1.53049	4.91396e-09	1.20527e-06	113.99	98.6	24.27	36.07
chr5	168175161	168175738	578	*	6.97513	7.47698	6.1991	1.16448	5.183e-09	1.26667e-06	190.75	165.56	81.21	65.74
chr8	143210169	143210614	446	*	5.01324	5.83071	2.94036	2.06973	5.24636e-09	1.27755e-06	65.13	48.69	6.53	8.82
chr14	107238790	107239270	481	*	6.62687	7.17792	5.72407	1.28963	5.35479e-09	1.29928e-06	159.35	130.25	50.4	55.31
chr6	26323146	26323649	504	*	4.61313	5.54876	1.09483	2.64646	5.60072e-09	1.35409e-06	54.67	38.95	1.87	2.4
chr1	10853865	10854323	459	*	5.98464	6.62469	4.8055	1.53554	5.64196e-09	1.35921e-06	101.19	96.17	27.07	28.86
chr22	38220516	38221356	841	*	6.38889	6.9745	5.38697	1.38505	5.81428e-09	1.39576e-06	140.74	110.78	42	41.69
chr5	2151351	2151796	446	*	6.38383	6.97387	5.36849	1.39597	5.9306e-09	1.41865e-06	143.06	108.34	40.14	42.49
chr18	73986617	73987070	454	*	5.49682	6.21518	4.00147	1.76335	6.11107e-09	1.45667e-06	76.77	71.82	16.8	15.23
chr1	205312449	205313378	930	*	6.94856	7.46079	6.14706	1.1908	6.20727e-09	1.47016e-06	197.73	154.6	78.41	63.33
chr11	364419	364866	448	*	7.39393	7.83328	6.75909	0.998812	6.21108e-09	1.47016e-06	243.09	213.03	109.21	107.42
chr22	23044982	23045441	460	*	5.84429	6.52162	4.52532	1.63697	6.34331e-09	1.49519e-06	105.84	77.91	19.6	26.45
chr20	43438990	43439409	420	*	5.67611	6.36757	4.29937	1.6788	6.36099e-09	1.49519e-06	87.23	77.91	17.73	21.64
chr2	47748060	47748841	782	*	7.0667	7.55231	6.32932	1.12057	6.51386e-09	1.52582e-06	198.89	176.51	88.67	72.15
chr1	6500713	6501084	372	*	6.53989	7.13177	5.51894	1.39772	7.09487e-09	1.65619e-06	172.14	108.34	42	49.7
chr6	32659815	32660176	362	*	5.38206	6.12774	3.75271	1.84236	7.26145e-09	1.68925e-06	81.42	58.43	14.93	12.02
chr12	103897574	103898108	535	*	5.82424	6.4944	4.53355	1.61617	7.3464e-09	1.70316e-06	101.19	79.13	21.47	24.85
chr5	52367514	52367971	458	*	5.19462	3.04444	6.02221	-2.08851	7.41972e-09	1.71429e-06	11.63	4.87	74.67	55.31
chr11	82952334	82952822	489	*	6.2537	5.15483	6.87017	-1.46431	7.51064e-09	1.72939e-06	38.38	32.87	124.14	109.83
chr17	32907668	32908246	579	*	5.692	6.38495	4.30899	1.68319	7.61988e-09	1.74437e-06	96.54	70.6	19.6	20.04
chr22	50421784	50422222	439	*	6.93397	7.43351	6.16352	1.14938	7.62724e-09	1.74437e-06	182.61	163.12	67.2	76.16
chr7	31099182	31099584	403	*	5.3915	6.12941	3.80181	1.81768	7.99191e-09	1.82092e-06	77.93	62.08	15.87	12.02
chr12	7167727	7168275	549	*	6.99269	6.2259	7.49072	-1.14626	8.01573e-09	1.82092e-06	79.09	70.6	180.15	179.57
chr11	62092321	62092831	511	*	7.29254	7.7377	6.64539	1.0119	8.09521e-09	1.83282e-06	217.5	209.38	100.81	99.41
chr22	23035213	23035683	471	*	6.60575	7.14633	5.73125	1.25942	8.22585e-09	1.85007e-06	137.25	146.08	54.14	52.11
chr7	153584075	153584544	470	*	4.94077	5.78011	2.69455	2.13079	8.22606e-09	1.85007e-06	70.95	38.95	6.53	6.41
chr5	54522176	54522740	565	*	7.32542	7.78305	6.65131	1.03953	8.37781e-09	1.87796e-06	238.44	202.08	89.61	111.43
chr6	82887778	82888199	422	*	5.65367	4.09898	6.3845	-1.78529	8.62768e-09	1.9232e-06	22.1	12.17	93.34	73.75
chr3	50712350	50713153	804	*	6.97758	7.46797	6.22898	1.13001	8.63645e-09	1.9232e-06	186.1	167.99	80.27	69.74
chr5	180100296	180100607	312	*	4.83418	5.67367	2.5866	2.12514	8.83741e-09	1.95935e-06	55.83	46.26	5.6	6.41
chr1	202174922	202175434	513	*	6.06919	6.69191	4.94961	1.47948	8.85667e-09	1.95935e-06	108.17	98.6	28.94	32.87
chr9	99215905	99216315	411	*	5.4907	3.83345	6.2417	-1.84595	9.01801e-09	1.98854e-06	15.12	13.39	84.01	67.34
chrX	37431579	37431959	381	*	5.10268	5.8918	3.22422	1.95663	9.0704e-09	1.9924e-06	63.97	54.78	7.47	11.22
chr17	75277064	75277560	497	*	6.81014	7.33361	5.9803	1.2151	9.11753e-09	1.9924e-06	182.61	139.99	65.34	60.93
chr1	91189213	91189661	449	*	5.89253	6.55853	4.6179	1.61057	9.12379e-09	1.9924e-06	108.17	80.34	29.87	19.24
chr11	76903019	76903485	467	*	6.82134	7.33555	6.01488	1.19222	9.15723e-09	1.99327e-06	173.3	149.73	70	59.32
chr3	128764646	128765634	989	*	6.33791	6.91576	5.35906	1.3588	9.29227e-09	2.01618e-06	120.96	120.52	42	40.08
chr22	34501468	34501792	325	*	5.10414	5.89509	3.21402	1.95771	9.42755e-09	2.039e-06	58.16	60.87	6.53	12.02
chr4	27693743	27694196	454	*	5.83429	6.51864	4.48697	1.65485	9.52712e-09	2.05397e-06	113.99	69.39	22.4	22.45
chr21	31781180	31781577	398	*	5.33672	6.08066	3.7164	1.83192	9.82159e-09	2.11074e-06	73.28	62.08	15.87	10.42
chr19	35546572	35546974	403	*	5.71518	6.39195	4.39847	1.63017	9.8606e-09	2.11242e-06	79.09	88.86	20.53	21.64
chr9	129464609	129465117	509	*	7.79526	8.18076	7.26763	0.864267	9.92748e-09	2.12003e-06	294.27	286.07	161.48	146.7
chr5	128797079	128797557	479	*	6.87869	7.3839	6.09448	1.16911	1.01521e-08	2.16119e-06	172.14	161.9	76.54	60.12
chr15	75280318	75280737	420	*	5.86255	6.51631	4.63395	1.56248	1.03089e-08	2.18768e-06	94.21	88.86	22.4	27.26
chr22	25678540	25679227	688	*	4.82177	5.65791	2.60234	2.10857	1.07167e-08	2.26372e-06	53.5	47.48	6.53	5.61
chr1	6514944	6515747	804	*	7.08571	7.56205	6.36974	1.08636	1.07341e-08	2.26372e-06	196.57	181.38	75.6	89.79
chr2	220777336	220777739	404	*	5.55257	4.0049	6.28196	-1.77894	1.10128e-08	2.31529e-06	16.28	15.83	80.27	75.36
chr12	65515125	65515585	461	*	6.90497	7.41727	6.10327	1.17793	1.12111e-08	2.34967e-06	187.26	154.6	59.74	77.76
chr9	139030405	139030843	439	*	6.56354	7.10695	5.68149	1.26402	1.13497e-08	2.37032e-06	144.23	131.47	51.34	51.31
chr9	1051801	1052325	525	*	6.15484	6.7646	5.07781	1.43847	1.13796e-08	2.37032e-06	113.99	103.47	29.87	37.68
chr16	3206733	3207345	613	*	4.77952	5.64937	2.24442	2.2237	1.17745e-08	2.44506e-06	66.3	34.09	4.67	4.81
chr9	133307680	133308104	425	*	5.66792	6.3633	4.27461	1.6802	1.19227e-08	2.46825e-06	97.7	66.95	18.67	20.04
chr21	45797279	45797684	406	*	5.20153	5.97232	3.43445	1.89959	1.20353e-08	2.48398e-06	74.44	51.13	11.2	10.42
chr11	2207853	2208335	483	*	6.66518	7.20145	5.8021	1.24254	1.22057e-08	2.51147e-06	161.67	132.69	52.27	59.32
chr15	100879209	100879522	314	*	5.77377	6.4462	4.4742	1.61141	1.24685e-08	2.55778e-06	97.7	76.69	19.6	24.85
chr2	100937683	100938250	568	*	6.18272	6.78279	5.13641	1.41144	1.29903e-08	2.65678e-06	107.01	113.21	32.67	37.68
chr11	84425324	84425703	380	*	5.73676	6.40765	4.44321	1.61381	1.33186e-08	2.71571e-06	91.89	77.91	24.27	19.24
chr20	61808680	61809040	361	*	5.74437	6.41041	4.46955	1.59908	1.33646e-08	2.71691e-06	84.91	85.21	24.27	20.04
chr14	89026227	89026648	422	*	5.80343	4.46335	6.486	-1.64368	1.37398e-08	2.78483e-06	19.77	24.35	83.07	96.2
chr22	38283675	38284375	701	*	5.70666	4.21914	6.42332	-1.74186	1.39647e-08	2.82195e-06	10.47	26.78	85.87	85.78
chr6	45914074	45914654	581	*	6.28354	5.22276	6.88821	-1.42323	1.40903e-08	2.83885e-06	43.04	31.65	122.27	114.64
chr6	88506195	88506662	468	*	5.92655	4.67826	6.58561	-1.57548	1.53664e-08	3.07882e-06	24.43	26.78	88.67	103.41
chr15	27083866	27084347	482	*	6.3466	6.92269	5.37288	1.35328	1.53723e-08	3.07882e-06	122.13	120.52	47.6	35.27
chr22	31847673	31848122	450	*	6.00633	4.80372	6.65296	-1.53714	1.57984e-08	3.15484e-06	29.08	26.78	108.27	92.99
chr19	5523035	5523569	535	*	6.90932	7.40317	6.15253	1.13506	1.64294e-08	3.2712e-06	180.28	158.25	76.54	65.74
chr1	171110868	171111425	558	*	5.24371	3.329	6.03845	-1.95379	1.65393e-08	3.28342e-06	12.79	7.3	73.74	57.72
chr14	36994474	36995149	676	*	6.86565	7.39831	6.01207	1.23239	1.66216e-08	3.2901e-06	204.71	132.69	62.54	66.54
chr17	1687177	1687737	561	*	6.27537	5.22695	6.87612	-1.41395	1.68266e-08	3.32098e-06	38.38	36.52	108.27	126.66
chr8	139698697	139699180	484	*	5.84136	6.48942	4.63362	1.54548	1.76116e-08	3.4658e-06	88.4	91.3	28	21.64
chr15	27262291	27262828	538	*	6.54457	7.08441	5.67204	1.25101	1.76862e-08	3.46737e-06	131.43	139.99	52.27	49.7
chr22	24503637	24504077	441	*	5.56097	4.05859	6.28084	-1.74128	1.7722e-08	3.46737e-06	16.28	17.04	73.74	81.77
chr10	1462892	1463534	643	*	5.98441	6.61456	4.83966	1.48742	1.84118e-08	3.59194e-06	104.68	91.3	25.2	32.07
chr11	30607616	30608222	607	*	6.0107	6.65326	4.82268	1.52363	1.85314e-08	3.60488e-06	120.96	80.34	26.14	30.46
chr4	115101610	115102078	469	*	6.23767	5.15703	6.84854	-1.4367	1.87213e-08	3.63139e-06	36.06	35.3	127.88	102.61
chr20	57782722	57783286	565	*	6.12276	6.72697	5.06343	1.41751	1.89314e-08	3.66166e-06	103.52	108.34	30.8	36.07
chr12	130526746	130527304	559	*	6.09891	6.72216	4.97754	1.46688	1.90184e-08	3.668e-06	118.64	92.52	26.14	36.88
chr16	28074398	28075277	880	*	6.3287	6.90016	5.36849	1.33209	1.91642e-08	3.68563e-06	124.45	114.43	40.14	42.49
chr1	202162938	202163229	292	*	5.40312	6.12132	3.90853	1.73125	1.92292e-08	3.68765e-06	68.62	70.6	14	16.03
chr12	48137794	48138148	355	*	6.25097	6.83977	5.2394	1.37736	1.9401e-08	3.70932e-06	125.62	103.47	35.47	40.08
chr1	2703155	2703656	502	*	5.37949	6.10524	3.8493	1.76026	1.94518e-08	3.70932e-06	75.6	62.08	16.8	12.02
chr4	8276589	8277019	431	*	5.88856	4.61119	6.55528	-1.59299	1.9804e-08	3.76587e-06	22.1	26.78	83.07	105.02
chr12	108522959	108524113	1155	*	6.53171	7.0717	5.65878	1.24987	2.01366e-08	3.8184e-06	130.27	138.78	51.34	49.7
chr11	3071094	3071436	343	*	4.98677	2.71365	5.82924	-2.09604	2.01987e-08	3.81947e-06	5.82	7.3	61.6	52.11
chr6	157735547	157736224	678	*	6.66688	5.75143	7.22252	-1.2862	2.04935e-08	3.86442e-06	65.13	42.61	162.41	136.28
chr16	11193922	11194423	502	*	5.63511	4.15812	6.34947	-1.71939	2.07067e-08	3.89378e-06	17.45	18.26	93.34	69.74
chr11	116147060	116147776	717	*	7.83369	8.21209	7.31934	0.840704	2.16196e-08	4.05418e-06	308.23	284.85	150.28	169.15
chr12	133055461	133055852	392	*	5.49109	6.19508	4.06059	1.68652	2.23577e-08	4.18102e-06	68.62	77.91	14.93	18.44
chr17	158864	159731	868	*	6.79927	7.3033	6.01795	1.15698	2.25373e-08	4.20299e-06	169.82	146.08	66.27	63.33
chr9	94533222	94533642	421	*	6.00564	4.83756	6.64254	-1.50742	2.26633e-08	4.21487e-06	26.75	30.43	98.01	101.81
chr21	45864217	45864763	547	*	5.91368	6.54439	4.76703	1.49061	2.28009e-08	4.22885e-06	95.38	91.3	28	26.45
chr7	107283882	107284318	437	*	5.23791	3.4248	6.01648	-1.89909	2.32937e-08	4.30844e-06	9.3	12.17	65.34	64.13
chr2	23535805	23536430	626	*	6.89437	7.38705	6.14034	1.12834	2.45941e-08	4.53658e-06	182.61	152.17	73.74	67.34
chr7	54614377	54614837	461	*	6.04366	6.67099	4.90853	1.477	2.59482e-08	4.76706e-06	119.8	84	28	32.07
chr17	62028311	62028648	338	*	5.9159	6.54522	4.774	1.48691	2.59845e-08	4.76706e-06	93.05	93.73	29.87	24.85
chr14	72398595	72399380	786	*	6.65917	7.19387	5.80025	1.23521	2.60601e-08	4.76801e-06	168.65	124.17	56.94	54.51
chr14	35684283	35684849	567	*	5.5146	4.00734	6.23551	-1.73385	2.63874e-08	4.81488e-06	15.12	17.04	73.74	76.96
chrX	152901678	152902202	525	*	6.04599	6.67882	4.89208	1.49878	2.70953e-08	4.92812e-06	122.13	82.78	34.54	24.85
chr8	22046250	22046709	460	*	5.98519	4.76476	6.63674	-1.53976	2.71536e-08	4.92812e-06	34.89	19.48	98.01	101.01
chr7	37324314	37324689	376	*	5.90498	6.53621	4.75653	1.48522	2.76477e-08	5.00438e-06	91.89	93.73	25.2	28.86
chr4	48548304	48548738	435	*	5.65599	4.24506	6.35548	-1.66984	2.81336e-08	5.07876e-06	22.1	15.83	86.81	76.96
chr3	46976963	46977460	498	*	6.49653	5.56822	7.05678	-1.29663	2.8788e-08	5.18307e-06	53.5	41.39	137.21	129.07
chr12	108154646	108155215	570	*	6.96864	7.45346	6.23309	1.10056	2.97482e-08	5.34174e-06	183.77	166.77	66.27	84.17
chr3	13324621	13325393	773	*	6.08923	6.69115	5.03713	1.40942	3.02032e-08	5.40908e-06	110.5	96.17	33.6	32.07
chr17	5697237	5697569	333	*	5.09784	5.86326	3.36157	1.84858	3.09013e-08	5.51951e-06	61.65	54.78	9.33	11.22
chr15	75335781	75336263	483	*	6.1734	5.10581	6.78021	-1.41831	3.22699e-08	5.74879e-06	37.22	31.65	114.81	105.02
chr6	28739447	28739864	418	*	5.13917	5.89575	3.45192	1.83024	3.28438e-08	5.83569e-06	56.99	62.08	13.07	8.82
chr19	15742671	15742962	292	*	6.09677	6.70655	5.01966	1.42345	3.31699e-08	5.8782e-06	115.15	93.73	28	36.88
chr13	53419591	53419912	322	*	5.62291	6.30379	4.28968	1.6119	3.3702e-08	5.9569e-06	83.74	74.26	15.87	23.25
chr9	136454516	136455015	500	*	6.86707	7.36153	6.10879	1.12531	3.60922e-08	6.36275e-06	177.96	150.95	63.47	74.55
chr1	110334655	110335037	383	*	5.74249	4.36826	6.43335	-1.63847	3.70265e-08	6.5105e-06	27.91	13.39	88.67	84.17
chr22	34810776	34811191	416	*	5.6831	6.35286	4.39396	1.58273	3.72747e-08	6.53716e-06	70.95	92.52	19.6	22.45
chr2	175201291	175201914	624	*	6.70054	7.20899	5.90839	1.16413	3.77255e-08	6.56576e-06	154.69	141.21	61.6	58.52
chr18	49147459	49147884	426	*	5.63191	6.31143	4.30418	1.61069	3.77476e-08	6.56576e-06	91.89	66.95	18.67	20.84
chr13	45148065	45148804	740	*	5.91381	4.70468	6.56225	-1.52638	3.77587e-08	6.56576e-06	30.24	21.91	95.21	93.79
chr7	2749143	2749776	634	*	7.5178	7.92718	6.94409	0.916004	3.78349e-08	6.56576e-06	264.03	222.77	120.41	125.86
chr1	248100070	248100719	650	*	6.44034	6.98455	5.55611	1.25493	3.79227e-08	6.56576e-06	129.11	124.17	47.6	46.5
chr3	55033130	55033644	515	*	5.89407	4.5951	6.56635	-1.58788	3.8225e-08	6.60122e-06	33.73	14.61	93.34	96.2
chr3	51671827	51672372	546	*	6.89729	6.14633	7.38867	-1.11942	3.83453e-08	6.60515e-06	68.62	73.04	170.81	164.34
chr19	14897043	14897622	580	*	7.21809	7.65686	6.58445	0.988986	3.8599e-08	6.63197e-06	194.24	209.38	98.94	92.99
chr3	67655856	67656283	428	*	5.5868	4.1625	6.28937	-1.6737	3.98472e-08	6.82911e-06	15.12	20.69	80.27	76.16
chr11	115860613	115861100	488	*	5.69029	6.34902	4.44321	1.55843	4.05652e-08	6.93459e-06	80.26	82.78	24.27	19.24
chr1	50737592	50738145	554	*	6.53819	7.07416	5.67592	1.23113	4.09205e-08	6.97177e-06	146.55	122.95	48.54	53.71
chr3	133758257	133758769	513	*	5.58604	6.26271	4.26969	1.59932	4.09886e-08	6.97177e-06	74.44	79.13	17.73	20.84
chr6	85484362	85484838	477	*	6.39311	6.94615	5.48485	1.27467	4.24403e-08	7.20059e-06	115.15	131.47	43.87	45.69
chr1	14155278	14155878	601	*	6.67024	7.19547	5.83591	1.21025	4.31038e-08	7.29488e-06	161.67	131.47	65.34	48.9
chr15	89437470	89437875	406	*	6.3856	6.94693	5.45428	1.30103	4.33813e-08	7.32354e-06	138.41	108.34	47.6	40.08
chr20	35028094	35028513	420	*	6.1856	6.77086	5.18469	1.36186	4.35057e-08	7.32626e-06	119.8	98.6	38.27	34.47
chr2	233232231	233232853	623	*	6.46741	7.01489	5.57435	1.26411	4.41652e-08	7.41416e-06	144.23	114.43	50.4	44.89
chr22	49363932	49364520	589	*	5.32854	6.04772	3.82938	1.71327	4.42466e-08	7.41416e-06	60.48	71.82	14	14.43
chr16	75654919	75655446	528	*	5.87997	4.6752	6.5272	-1.5216	4.47103e-08	7.47335e-06	26.75	24.35	91.47	92.99
chr8	42177052	42177570	519	*	6.42325	5.49743	6.98262	-1.29091	4.53954e-08	7.56917e-06	46.52	43.82	127.88	125.06
chr19	17716770	17717586	817	*	7.66526	8.05624	7.12726	0.874478	4.57748e-08	7.61369e-06	279.15	253.2	152.14	127.46
chr17	77814221	77814653	433	*	7.11983	7.57806	6.4444	1.03831	4.69274e-08	7.78434e-06	210.52	171.64	92.41	81.77
chr7	110738630	110739112	483	*	6.06685	4.93073	6.69447	-1.47107	4.70307e-08	7.78434e-06	23.26	37.74	110.14	97
chr15	49967315	49967716	402	*	4.95596	2.71365	5.79483	-2.03869	4.74424e-08	7.83333e-06	5.82	7.3	65.34	45.69
chr7	149558249	149558900	652	*	6.41037	6.95655	5.52083	1.25905	4.95973e-08	8.16919e-06	129.11	119.3	48.54	43.29
chr8	542000	542371	372	*	5.07396	5.83345	3.37079	1.81751	5.11659e-08	8.4071e-06	60.48	53.56	10.27	10.42
chr22	46526890	46527446	557	*	6.61786	7.14673	5.77415	1.21255	5.19198e-08	8.51033e-06	161.67	121.73	54.14	55.31
chr17	77105486	77106104	619	*	6.13576	6.73687	5.08623	1.39784	5.21254e-08	8.52339e-06	124.45	88.86	32.67	35.27
chr13	38214538	38215031	494	*	5.67373	4.23886	6.3787	-1.66573	5.41484e-08	8.83284e-06	25.59	12.17	94.27	72.15
chr18	24351472	24351958	487	*	5.55974	6.24506	4.20845	1.61775	5.57385e-08	9.07036e-06	88.4	63.3	17.73	19.24
chr3	105546837	105547209	373	*	5.00588	2.93898	5.82254	-1.96433	5.6526e-08	9.17646e-06	10.47	4.87	57.87	55.31
chr2	242786220	242786639	420	*	6.54928	7.09657	5.65673	1.26272	5.75122e-08	9.31131e-06	160.51	113.21	56	44.89
chr16	795757	796164	408	*	6.53737	7.0637	5.7002	1.20276	5.76317e-08	9.31131e-06	136.08	131.47	49.47	54.51
chr17	72357158	72358046	889	*	7.54012	7.94122	6.98262	0.895452	5.83488e-08	9.40471e-06	266.35	225.21	127.88	125.06
chr18	76959988	76960422	435	*	5.3621	3.7705	6.10038	-1.75623	5.90783e-08	9.49968e-06	15.12	12.17	63.47	73.75
chr7	152591407	152591944	538	*	7.08287	7.53432	6.42222	1.01707	5.94545e-08	9.53752e-06	194.24	176.51	84.94	86.58
chr5	172197512	172198023	512	*	7.26032	7.68822	6.64926	0.959008	5.96739e-08	9.55008e-06	212.85	199.64	98.94	101.81
chr12	131939177	131939675	499	*	7.251	7.68282	6.63187	0.969137	6.25613e-08	9.97763e-06	219.83	191.12	98.94	99.41
chr7	25256250	25256801	552	*	6.54862	5.67291	7.08966	-1.2388	6.26402e-08	9.97763e-06	56.99	45.04	140.94	131.47
chr2	220007064	220007585	522	*	5.71925	4.4248	6.39037	-1.57891	6.32977e-08	1.00587e-05	18.61	24.35	86.81	80.97
chr19	4208679	4209118	440	*	5.9862	4.83893	6.6171	-1.47221	6.40709e-08	1.01577e-05	25.59	31.65	107.34	88.98
chr19	29124443	29125050	608	*	6.69543	7.20952	5.88928	1.16729	6.44555e-08	1.01948e-05	152.37	143.64	50.4	68.14
chr8	20898512	20899035	524	*	7.15385	7.59381	6.51772	0.989727	6.47196e-08	1.02127e-05	198.89	187.47	94.27	88.98
chr17	30810451	30810928	478	*	6.18077	5.15812	6.7732	-1.37209	6.49425e-08	1.02241e-05	34.89	36.52	112.94	105.82
chr1	218472731	218473166	436	*	5.89414	4.71066	6.53542	-1.49837	6.541e-08	1.02585e-05	25.59	26.78	98.94	86.58
chr6	168433022	168433460	439	*	5.25376	3.57316	6.00912	-1.79876	6.54641e-08	1.02585e-05	11.63	12.17	60.67	68.14
chr22	22958612	22959007	396	*	5.80847	6.4549	4.60658	1.50935	6.61971e-08	1.03494e-05	101.19	74.26	21.47	27.26
chr10	77863039	77863507	469	*	5.81477	4.57808	6.47072	-1.53839	6.68406e-08	1.04259e-05	19.77	28	92.41	84.98
chr1	11380145	11380681	537	*	7.03967	7.50453	6.34957	1.05303	6.70284e-08	1.04312e-05	200.06	163.12	87.74	75.36
chr22	23052227	23052532	306	*	5.55012	6.22538	4.2394	1.58552	6.7957e-08	1.05514e-05	80.26	69.39	17.73	20.04
chr1	18311015	18311506	492	*	6.52423	7.05051	5.68719	1.20044	7.03213e-08	1.08935e-05	136.08	129.04	48.54	54.51
chr17	73056019	73056484	466	*	5.14305	3.33289	5.92113	-1.85216	7.16725e-08	1.10645e-05	11.63	8.52	63.47	57.72
chr19	51396383	51396862	480	*	5.12773	5.8756	3.48697	1.77568	7.17516e-08	1.10645e-05	66.3	51.13	11.2	11.22
chr19	6551894	6552393	500	*	5.40784	6.1258	3.91431	1.70666	7.25948e-08	1.11595e-05	59.32	80.34	20.53	9.62
chr1	163038953	163039398	446	*	6.27939	5.27208	6.86678	-1.3553	7.26974e-08	1.11595e-05	39.55	37.74	131.61	101.81
chr12	130498426	130498952	527	*	5.87518	6.49656	4.76004	1.44458	7.29765e-08	1.11704e-05	95.38	85.21	26.14	28.06
chr17	35111833	35112279	447	*	6.13732	6.72438	5.131	1.35294	7.30988e-08	1.11704e-05	111.66	99.82	30.8	39.28
chr7	73689575	73690134	560	*	6.91485	7.38414	6.21486	1.06061	7.34987e-08	1.12062e-05	170.98	163.12	75.6	72.95
chr8	104511551	104512071	521	*	5.30426	6.0167	3.83605	1.68365	7.40909e-08	1.12711e-05	68.62	60.87	14.93	13.63
chr1	18249323	18249761	439	*	6.56537	7.08556	5.74387	1.18691	7.55463e-08	1.14391e-05	126.78	144.86	55.07	52.11
chr7	101944010	101944664	655	*	5.92607	6.54187	4.82938	1.43052	7.56404e-08	1.14391e-05	102.35	84	28	28.86
chr7	99787603	99788089	487	*	5.63381	4.29463	6.31616	-1.60223	7.57016e-08	1.14391e-05	19.77	19.48	84.01	75.36
chr18	44773409	44774280	872	*	7.3471	7.77122	6.74379	0.952612	7.58871e-08	1.14415e-05	237.28	199.64	115.74	98.6
chr6	161188229	161188785	557	*	7.01819	7.47874	6.33767	1.04216	7.61434e-08	1.14547e-05	181.45	175.3	89.61	72.15
chr18	35065116	35065734	619	*	7.00977	7.48256	6.30188	1.06303	7.74113e-08	1.16196e-05	187.26	170.43	67.2	90.59
chr5	180017800	180018249	450	*	4.74003	5.55376	2.69455	1.94416	7.79524e-08	1.16749e-05	47.69	46.26	6.53	6.41
chr12	125194361	125194758	398	*	5.4298	3.8885	6.15787	-1.71775	7.81614e-08	1.16804e-05	17.45	12.17	80.27	62.53
chr3	37783140	37783584	445	*	5.36803	6.06996	3.94653	1.6501	7.8857e-08	1.17584e-05	68.62	65.74	14	16.83
chr15	60419659	60420175	517	*	5.75299	4.45802	6.42424	-1.57034	8.00811e-08	1.19147e-05	23.26	20.69	98.01	73.75
chr10	43751175	43751846	672	*	6.84658	7.32586	6.12385	1.08627	8.13483e-08	1.20766e-05	167.49	153.38	73.74	65.74
chr14	37124979	37125688	710	*	6.89519	7.37605	6.16881	1.08797	8.19605e-08	1.21409e-05	184.94	147.3	70.94	72.95
chr1	94201261	94201633	373	*	5.13485	3.33289	5.91156	-1.84199	8.43888e-08	1.24733e-05	11.63	8.52	63.47	56.92
chr16	63323754	63324177	424	*	6.02668	6.62389	4.9893	1.38516	8.50533e-08	1.25442e-05	103.52	93.73	35.47	28.06
chr12	130395988	130396480	493	*	5.75488	6.40443	4.54173	1.51566	8.86222e-08	1.30185e-05	100.03	69.39	23.33	23.25
chr20	23029096	23029712	617	*	7.38803	7.80625	6.79669	0.937906	8.86542e-08	1.30185e-05	241.93	205.73	121.34	101.01
chr14	104563388	104563714	327	*	5.94497	6.55626	4.86298	1.41192	9.01147e-08	1.31909e-05	88.4	99.82	26.14	32.07
chr10	72200987	72201478	492	*	4.95511	5.72512	3.1925	1.8275	9.02181e-08	1.31909e-05	54.67	51.13	10.27	8.02
chr21	40070962	40071529	568	*	6.00022	6.59774	4.96186	1.38235	9.17941e-08	1.33924e-05	101.19	92.52	32.67	29.66
chr11	17757301	17757730	430	*	6.38137	6.92927	5.48715	1.24953	9.38945e-08	1.36694e-05	124.45	119.3	39.2	50.5
chr6	36947082	36947483	402	*	6.25746	5.26904	6.83854	-1.33531	9.44043e-08	1.37142e-05	43.04	34.09	122.27	106.62
chr6	27125210	27126097	888	*	6.32693	5.37487	6.89555	-1.30415	9.60372e-08	1.39215e-05	47.69	35.3	119.47	118.65
chr11	68657379	68658029	651	*	7.04906	6.37041	7.50875	-1.03374	9.67654e-08	1.39971e-05	80.26	85.21	189.48	174.76
chr10	57390857	57391384	528	*	6.94767	7.41442	6.25338	1.04865	9.75983e-08	1.40875e-05	175.63	165.56	70	82.57
chr17	79228639	79229131	493	*	6.67473	5.86057	7.19202	-1.17477	9.81171e-08	1.41322e-05	66.3	49.91	146.54	145.9
chr1	3508015	3508408	394	*	5.02323	5.79074	3.27503	1.80516	9.93861e-08	1.42846e-05	53.5	57.21	6.53	12.83
chr12	48080399	48080807	409	*	5.62644	4.25738	6.31606	-1.61538	1.00319e-07	1.43882e-05	15.12	23.13	89.61	69.74
chr17	11144484	11145114	631	*	4.72572	5.53748	2.69455	1.92527	1.0234e-07	1.46448e-05	44.2	48.69	6.53	6.41
chr14	95215051	95215479	429	*	5.68153	6.32829	4.47847	1.50159	1.02541e-07	1.46448e-05	77.93	82.78	20.53	24.05
chr14	56331480	56331948	469	*	5.22025	5.94661	3.68719	1.70606	1.05489e-07	1.49898e-05	69.79	53.56	12.13	13.63
chr8	132052364	132052669	306	*	4.5324	5.39495	2.07241	2.05058	1.05541e-07	1.49898e-05	48.85	35.3	2.8	5.61
chr8	81003801	81004184	384	*	5.78313	4.57152	6.43225	-1.50931	1.05621e-07	1.49898e-05	24.43	23.13	87.74	84.98
chr17	71952717	71953084	368	*	5.68666	6.34326	4.44757	1.53457	1.06678e-07	1.51081e-05	94.21	68.17	25.2	18.44
chr22	38187795	38188318	524	*	6.12004	5.02721	6.73467	-1.41687	1.11016e-07	1.56896e-05	37.22	28	123.21	89.79
chr22	45944864	45945315	452	*	6.79315	5.98439	7.30828	-1.16615	1.12718e-07	1.5897e-05	77.93	48.69	167.08	149.91
chr5	140419754	140420115	362	*	5.49545	6.16874	4.1925	1.57387	1.14548e-07	1.61216e-05	73.28	70.6	20.53	16.03
chr15	91576160	91576811	652	*	7.18146	7.62557	6.53653	0.99678	1.15822e-07	1.62669e-05	223.32	171.64	94.27	91.39
chr17	15360187	15360879	693	*	5.47738	4.06093	6.17814	-1.63975	1.18738e-07	1.66421e-05	15.12	18.26	71.87	72.95
chr5	170846407	170847262	856	*	6.51719	7.0415	5.68519	1.19416	1.19913e-07	1.6772e-05	145.39	118.08	53.2	49.7
chr14	22471028	22471379	352	*	4.88333	5.67291	3.00198	1.85452	1.20327e-07	1.67952e-05	56.99	45.04	5.6	10.42
chr12	43732732	43733143	412	*	5.74173	4.45089	6.41192	-1.55635	1.21104e-07	1.68447e-05	27.91	15.83	93.34	76.96
chr10	126254276	126254757	482	*	6.12354	6.69962	5.14986	1.32407	1.2118e-07	1.68447e-05	110.5	97.39	37.34	33.67
chr10	62580034	62580428	395	*	5.90777	4.66599	6.56509	-1.52056	1.32294e-07	1.8352e-05	33.73	17.04	109.21	80.17
chr11	102981174	102981500	327	*	5.18748	3.43568	5.95562	-1.80706	1.32747e-07	1.83772e-05	5.82	15.83	67.2	56.92
chr2	126273934	126274451	518	*	5.95397	6.55376	4.90853	1.37773	1.3452e-07	1.85711e-05	95.38	92.52	28	32.07
chr19	29969424	29969980	557	*	5.94649	6.5521	4.88272	1.39116	1.34697e-07	1.85711e-05	100.03	87.65	26.14	32.87
chr11	130697619	130698146	528	*	6.35194	5.44061	6.90609	-1.26609	1.36297e-07	1.87536e-05	43.04	43.82	114.81	125.06
chr17	72347869	72348162	294	*	5.02659	5.78437	3.33276	1.78251	1.38665e-07	1.90407e-05	63.97	46.26	12.13	8.02
chr16	19992157	19992610	454	*	5.51231	6.18973	4.19295	1.57028	1.39095e-07	1.90611e-05	80.26	65.74	14.93	21.64
chr7	18913281	18913681	401	*	5.65063	4.33094	6.32814	-1.57181	1.41187e-07	1.93087e-05	24.43	15.83	87.74	72.95
chr10	133849948	133850887	940	*	5.91876	6.53242	4.8291	1.42074	1.41975e-07	1.93773e-05	102.35	82.78	33.6	23.25
chr4	3785451	3785844	394	*	5.94137	6.5577	4.84297	1.41852	1.44853e-07	1.97303e-05	110.5	77.91	26.14	31.26
chr5	926970	927414	445	*	7.1151	7.55231	6.48476	0.979018	1.50524e-07	2.04615e-05	198.89	176.51	93.34	85.78
chr17	1971355	1971675	321	*	5.06026	3.243	5.83952	-1.82296	1.55383e-07	2.10797e-05	11.63	7.3	56	58.52
chr12	75953898	75954343	446	*	5.28199	3.71662	6.01501	-1.71155	1.62489e-07	2.19927e-05	10.47	15.83	64.4	64.93
chr17	76824571	76825046	476	*	5.94528	4.83756	6.56443	-1.42753	1.6351e-07	2.19927e-05	26.75	30.43	85.87	103.41
chr2	20490686	20491231	546	*	6.80693	6.06821	7.29311	-1.0945	1.63674e-07	2.19927e-05	72.11	62.08	154.94	158.73
chr14	75310287	75310713	427	*	4.89309	2.84166	5.70765	-1.90997	1.63714e-07	2.19927e-05	5.82	8.52	47.6	56.92
chr22	50118388	50118896	509	*	6.90046	7.36733	6.20588	1.0463	1.63737e-07	2.19927e-05	175.63	154.6	69.07	78.56
chr12	15685333	15685720	388	*	5.74247	4.48875	6.40297	-1.52494	1.6855e-07	2.25944e-05	29.08	15.83	85.87	83.37
chr8	139779782	139780290	509	*	6.99562	7.44408	6.34139	1.00369	1.69457e-07	2.2671e-05	180.28	167.99	81.21	80.97
chr2	233401741	233402103	363	*	5.63101	6.29314	4.37118	1.5235	1.72705e-07	2.30601e-05	82.58	74.26	14.93	26.45
chr17	71640867	71641722	856	*	6.29713	6.85333	5.38014	1.26603	1.73731e-07	2.31514e-05	131.43	99.82	39.2	44.09
chr11	117692746	117693105	360	*	6.65169	7.1588	5.86284	1.14672	1.74324e-07	2.31847e-05	162.84	122.95	57.87	58.52
chr9	35385005	35385535	531	*	5.43638	4.00002	6.14169	-1.63641	1.7528e-07	2.32662e-05	18.61	13.39	74.67	66.54
chr14	69567984	69568396	413	*	6.12977	5.1322	6.71392	-1.33561	1.77594e-07	2.35273e-05	36.06	34.09	107.34	102.61
chr5	140535132	140535549	418	*	4.92523	5.69002	3.1925	1.78653	1.81343e-07	2.39769e-05	56.99	46.26	10.27	8.02
chr9	95004776	95005242	467	*	5.51362	4.15593	6.2005	-1.5906	1.84793e-07	2.43833e-05	18.61	17.04	76.54	70.55
chr2	238341067	238341590	524	*	5.93421	4.79952	6.56141	-1.44297	1.85137e-07	2.43833e-05	32.57	23.13	83.07	105.82
chr20	36172114	36172607	494	*	5.51509	4.15812	6.20179	-1.59052	1.86092e-07	2.44615e-05	17.45	18.26	77.47	69.74
chr15	53076090	53076556	467	*	6.8303	7.30676	6.11405	1.07501	1.86947e-07	2.45263e-05	153.53	163.12	78.41	60.12
chr14	71789343	71789992	650	*	5.48518	4.10808	6.17672	-1.60072	1.95273e-07	2.55691e-05	17.45	17.04	76.54	68.14
chr9	5799187	5799632	446	*	6.42116	5.5341	6.96643	-1.23617	1.95852e-07	2.55953e-05	48.85	43.82	136.28	113.84
chr13	112157488	112157874	387	*	5.20682	5.9288	3.69455	1.67544	1.9746e-07	2.57558e-05	50.01	71.82	13.07	12.83
chr2	180714924	180715299	376	*	5.2299	3.63885	5.96807	-1.71372	1.99397e-07	2.59512e-05	13.96	10.96	63.47	61.73
chr14	21149923	21150353	431	*	4.37515	5.24918	1.79498	2.04099	1.99725e-07	2.59512e-05	39.55	36.52	3.73	3.21
chr3	14643393	14644078	686	*	5.91993	6.52545	4.85644	1.38216	2.02233e-07	2.62268e-05	95.38	88.86	24.27	33.67
chr17	2627836	2628376	541	*	6.01886	6.61257	4.99229	1.36341	2.05047e-07	2.65409e-05	110.5	85.21	36.4	27.26
chr20	35910913	35911401	489	*	5.90671	4.75254	6.5396	-1.45785	2.05457e-07	2.65432e-05	18.61	35.3	97.07	88.98
chr6	108496636	108497092	457	*	5.40741	6.114	3.96543	1.63013	2.06448e-07	2.66203e-05	83.74	54.78	11.2	20.04
chr5	138729775	138730271	497	*	6.95951	7.41304	6.29432	1.01473	2.09071e-07	2.68739e-05	182.61	158.25	78.41	78.56
chr3	13461078	13461506	429	*	5.24227	5.94851	3.80181	1.64007	2.09208e-07	2.68739e-05	66.3	57.21	15.87	12.02
chr1	39853170	39853599	430	*	5.80034	4.61119	6.44321	-1.47861	2.11385e-07	2.70693e-05	22.1	26.78	97.07	76.96
chr4	21950026	21950761	736	*	7.24148	7.67996	6.60844	0.977633	2.11825e-07	2.70693e-05	237.28	172.86	93.34	101.81
chr2	128173424	128173951	528	*	5.64347	6.28691	4.45229	1.47806	2.11929e-07	2.70693e-05	70.95	85.21	20.53	23.25
chr3	129694297	129695006	710	*	5.75333	6.37723	4.62979	1.43541	2.15437e-07	2.74656e-05	89.56	76.69	27.07	22.45
chr4	184679417	184679866	450	*	5.64648	6.28591	4.46955	1.47276	2.18772e-07	2.78383e-05	73.28	82.78	24.27	20.04
chr2	1557732	1558043	312	*	5.12716	3.41016	5.88915	-1.76594	2.21359e-07	2.81059e-05	13.96	7.3	56	62.53
chr17	79486125	79486785	661	*	6.75184	7.22825	6.03568	1.06922	2.2187e-07	2.81059e-05	147.72	152.17	66.27	64.93
chrX	119443165	119443682	518	*	5.95707	6.56699	4.87949	1.39298	2.22182e-07	2.81059e-05	110.5	79.13	25.2	33.67
chr12	93521145	93522039	895	*	6.30803	5.39959	6.86114	-1.25545	2.22535e-07	2.81059e-05	43.04	41.39	119.47	113.03
chr3	2140049	2140429	381	*	4.62452	5.45267	2.46992	1.92005	2.23723e-07	2.82032e-05	53.5	34.09	4.67	6.41
chr12	6022100	6022534	435	*	5.96045	6.57458	4.86922	1.41248	2.25731e-07	2.84035e-05	115.15	75.47	33.6	24.85
chr17	38095678	38096241	564	*	6.21803	5.27411	6.78381	-1.28799	2.29163e-07	2.87486e-05	37.22	40.17	107.34	113.03
chr16	57201881	57202331	451	*	5.82342	4.63413	6.46633	-1.47375	2.29323e-07	2.87486e-05	31.4	18.26	94.27	82.57
chr18	24384436	24384837	402	*	4.91423	5.6752	3.20286	1.76887	2.34947e-07	2.93993e-05	53.5	48.69	11.2	7.21
chr4	185084960	185085302	343	*	6.1676	6.72512	5.24692	1.26673	2.37542e-07	2.96691e-05	109.33	102.26	38.27	37.68
chr10	85836276	85836893	618	*	6.00697	4.95293	6.6095	-1.37903	2.42025e-07	3.01733e-05	29.08	32.87	88.67	106.62
chr3	137427858	137428230	373	*	4.96873	5.7229	3.29453	1.74206	2.45031e-07	3.04806e-05	58.16	47.48	8.4	11.22
chr1	6483297	6483980	684	*	7.23784	7.6831	6.59047	0.995416	2.4539e-07	3.04806e-05	244.26	166.77	98.94	93.79
chr8	896792	897195	404	*	5.58355	6.23551	4.36157	1.49521	2.53642e-07	3.14478e-05	83.74	66.95	18.67	22.45
chr12	117910786	117911214	429	*	5.63657	6.27562	4.46095	1.46566	2.56368e-07	3.17278e-05	70.95	84	22.4	21.64
chr17	77184038	77184486	449	*	6.74776	7.22238	6.03568	1.06362	2.60621e-07	3.21953e-05	147.72	150.95	66.27	64.93
chr5	135393608	135394100	493	*	6.33785	5.44151	6.88653	-1.24227	2.65525e-07	3.27413e-05	41.87	45.04	126.01	110.63
chr8	129695714	129696120	407	*	5.40774	4.00246	6.10591	-1.60756	2.7134e-07	3.33976e-05	17.45	14.61	67.2	70.55
chr11	29293526	29294004	479	*	5.70533	4.50261	6.352	-1.48323	2.79695e-07	3.43634e-05	19.77	25.56	84.01	79.36
chr3	99809091	99809649	559	*	6.08883	5.08008	6.67669	-1.33559	2.84866e-07	3.49353e-05	37.22	30.43	109.21	95.4
chr1	19724918	19725368	451	*	5.72531	4.53916	6.36734	-1.47211	2.86065e-07	3.50189e-05	20.94	25.56	79.34	85.78
chr20	36965997	36966554	558	*	6.56525	7.07979	5.75798	1.16491	2.89216e-07	3.53408e-05	150.04	120.52	62.54	45.69
chr3	192232455	192232923	469	*	5.2297	5.94407	3.75271	1.64854	2.90601e-07	3.5446e-05	74.44	48.69	14.93	12.02
chr12	57869667	57870385	719	*	6.63865	7.1675	5.79498	1.19718	2.92604e-07	3.56261e-05	177.96	109.56	59.74	51.31
chr5	171550084	171550605	522	*	5.44292	4.05859	6.13618	-1.59297	2.94377e-07	3.57777e-05	16.28	17.04	76.54	64.13
chr11	72532985	72533815	831	*	6.66494	7.15934	5.90681	1.11122	2.96482e-07	3.59689e-05	160.51	125.38	60.67	59.32
chr10	114535175	114535548	374	*	4.7524	2.56657	5.58445	-1.91268	2.98123e-07	3.60544e-05	6.98	4.87	49.47	46.5
chr17	40333297	40333701	405	*	6.96599	7.41179	6.31745	0.992594	2.98252e-07	3.60544e-05	162.84	177.73	79.34	80.17
chr17	58227340	58227796	457	*	4.94156	5.70543	3.21402	1.75308	2.99146e-07	3.6098e-05	59.32	45.04	6.53	12.02
chr14	21924322	21925100	779	*	6.92309	6.23655	7.38635	-1.03307	3.01975e-07	3.63745e-05	81.42	69.39	172.68	161.94
chr19	48948472	48949031	560	*	6.76956	6.04535	7.24948	-1.07506	3.05358e-07	3.67167e-05	65.13	66.95	151.21	153.12
chr7	33498788	33499482	695	*	6.66969	5.89575	7.17068	-1.12426	3.08651e-07	3.70469e-05	56.99	62.08	155.88	132.27
chr19	15342480	15343162	683	*	6.48148	6.99086	5.68703	1.14774	3.10159e-07	3.71619e-05	131.43	122.95	54.14	48.9
chr11	133837105	133837566	462	*	6.24008	6.78827	5.3451	1.23614	3.1613e-07	3.78104e-05	115.15	105.91	36.4	44.89
chr6	33640501	33640997	497	*	6.12267	5.13443	6.7037	-1.31796	3.23911e-07	3.86728e-05	33.73	36.52	113.87	94.6
chr19	19738946	19739356	411	*	4.98369	5.72438	3.37994	1.70487	3.2522e-07	3.87563e-05	55.83	49.91	11.2	9.62
chr7	157668090	157668527	438	*	5.20583	5.90847	3.78122	1.61172	3.25755e-07	3.87563e-05	60.48	59.65	13.07	14.43
chr9	127656759	127657272	514	*	5.86921	4.77336	6.48476	-1.40163	3.34627e-07	3.97407e-05	27.91	26.78	93.34	85.78
chr5	90370409	90370781	373	*	4.80393	2.69565	5.62611	-1.88261	3.35204e-07	3.97407e-05	9.3	3.65	46.67	52.11
chr18	49814776	49815142	367	*	5.36276	6.04476	4.02501	1.57058	3.37771e-07	3.99751e-05	66.3	65.74	20.53	12.02
chr14	24779853	24780618	766	*	7.75037	8.10447	7.28007	0.778475	3.38783e-07	3.99913e-05	282.64	267.81	163.34	147.51
chr5	180486228	180487039	812	*	4.87903	5.6412	3.16098	1.7465	3.3909e-07	3.99913e-05	52.34	47.48	7.47	10.42
chr12	92537750	92538233	484	*	6.53986	5.72438	7.05768	-1.16596	3.42657e-07	4.03418e-05	55.83	49.91	121.34	145.1
chr17	73689523	73690042	520	*	4.74502	2.57972	5.57452	-1.9006	3.4706e-07	4.07589e-05	4.65	7.3	44.8	50.5
chr5	135355023	135355450	428	*	5.36035	3.8885	6.07358	-1.63612	3.47404e-07	4.07589e-05	17.45	12.17	56.94	77.76
chr7	127269270	127269716	447	*	6.195	6.76835	5.2293	1.29526	3.52067e-07	4.12344e-05	127.94	90.08	31.74	43.29
chr22	23296906	23297187	282	*	5.29095	5.98225	3.91484	1.58289	3.52831e-07	4.12526e-05	55.83	70.6	14.93	15.23
chr18	13217104	13217729	626	*	6.89048	7.34291	6.22771	1.01001	3.56081e-07	4.15608e-05	164	160.69	79.34	70.55
chr12	75784747	75785333	587	*	7.2585	6.67635	7.67212	-0.916252	3.57122e-07	4.15779e-05	103.52	101.04	197.88	210.03
chr16	3068113	3068503	391	*	6.0083	6.58946	5.01966	1.31332	3.57456e-07	4.15779e-05	98.87	93.73	28	36.88
chr15	86343716	86344037	322	*	5.30406	5.99239	3.94036	1.57175	3.58229e-07	4.15964e-05	62.81	64.52	13.07	17.64
chr2	1595647	1596107	461	*	5.56535	6.2136	4.35694	1.47586	3.6716e-07	4.25604e-05	80.26	68.17	17.73	23.25
chr1	39073887	39074447	561	*	6.1862	6.73413	5.2919	1.236	3.69393e-07	4.2746e-05	107.01	105.91	38.27	40.08
chr16	51180055	51180452	398	*	5.42946	4.06327	6.11839	-1.57805	3.72003e-07	4.29746e-05	13.96	19.48	70	68.94
chr5	16179105	16179567	463	*	5.46579	6.12997	4.19813	1.51361	3.76404e-07	4.32982e-05	76.77	63.3	15.87	20.84
chr3	87055983	87056532	550	*	6.04218	4.92816	6.66323	-1.41217	3.76605e-07	4.32982e-05	25.59	35.3	124.14	78.56
chr18	9147924	9148339	416	*	6.10386	5.13109	6.67964	-1.30341	3.77337e-07	4.32982e-05	37.22	32.87	100.81	104.22
chr3	10557857	10558255	399	*	4.8868	5.64277	3.20286	1.73706	3.77363e-07	4.32982e-05	50.01	49.91	11.2	7.21
chr7	2961378	2961790	413	*	5.79322	6.40627	4.70552	1.39804	3.83415e-07	4.39183e-05	95.38	74.26	28.94	23.25
chr14	74769509	74770167	659	*	6.91125	6.19799	7.3864	-1.05879	3.86245e-07	4.41676e-05	88.4	58.43	167.08	167.55
chr17	44953596	44954243	648	*	6.51941	7.03362	5.71294	1.15789	3.98137e-07	4.5437e-05	150.04	111.99	56	48.9
chr5	37413030	37413538	509	*	7.13636	6.50324	7.57489	-0.971347	3.98864e-07	4.5437e-05	103.52	77.91	196.95	184.38
chr22	23775416	23775825	410	*	6.20939	6.75686	5.31636	1.23185	3.99744e-07	4.5437e-05	112.82	103.47	36.4	43.29
chr2	95536050	95536572	523	*	7.15152	7.57827	6.54284	0.94504	4.0003e-07	4.5437e-05	209.36	172.86	88.67	97.8
chr13	53776036	53776422	387	*	6.17092	6.72327	5.26455	1.24752	4.04257e-07	4.5766e-05	115.15	96.17	39.2	37.68
chr2	27356640	27357165	526	*	5.61236	4.329	6.28063	-1.52115	4.04279e-07	4.5766e-05	25.59	14.61	84.94	70.55
chr10	135523049	135523541	493	*	5.74924	6.38354	4.59021	1.45072	4.05723e-07	4.58528e-05	100.03	66.95	28.94	19.24
chr12	28736606	28737105	500	*	5.8395	4.71365	6.46409	-1.41993	4.0709e-07	4.59306e-05	23.26	29.22	98.01	78.56
chr16	79801506	79801979	474	*	5.41683	4.00977	6.11542	-1.59575	4.11078e-07	4.63034e-05	13.96	18.26	79.34	59.32
chr1	18434323	18434771	449	*	4.57258	5.39402	2.46992	1.8675	4.18454e-07	4.70559e-05	50.01	34.09	4.67	6.41
chr12	39300336	39300892	557	*	7.06863	7.497	6.45663	0.949076	4.19533e-07	4.7099e-05	188.43	172.86	85.87	89.79
chr8	53001566	53001998	433	*	5.90971	6.50583	4.87571	1.35816	4.23249e-07	4.74375e-05	96.54	85.21	35.47	23.25
chr1	24919831	24920419	589	*	5.70853	4.5341	6.34724	-1.4519	4.24268e-07	4.74726e-05	24.43	21.91	85.87	76.96
chr4	4386520	4386988	469	*	5.94176	6.53242	4.92453	1.33486	4.24964e-07	4.74726e-05	102.35	82.78	27.07	33.67
chr1	203840110	203840583	474	*	6.66895	5.92172	7.15876	-1.09532	4.33043e-07	4.82954e-05	62.81	58.43	139.08	146.7
chr19	51162156	51162517	362	*	4.70973	5.51075	2.75331	1.81869	4.34401e-07	4.83672e-05	54.67	36.52	4.67	8.82
chr11	114645343	114645773	431	*	5.93125	6.51845	4.92453	1.32507	4.36705e-07	4.85011e-05	88.4	94.95	27.07	33.67
chr1	3643797	3644300	504	*	6.76821	7.23332	6.07757	1.03822	4.37037e-07	4.85011e-05	151.21	149.73	70.94	64.13
chr10	116512848	116513215	368	*	4.99683	3.13827	5.7828	-1.78655	4.40332e-07	4.87868e-05	13.96	3.65	58.8	51.31
chr2	232406244	232406725	482	*	5.89364	6.4855	4.87275	1.33958	4.57709e-07	5.06292e-05	98.87	80.34	28.94	29.66
chr9	976271	977376	1106	*	5.46427	6.12941	4.19295	1.50929	4.59699e-07	5.07664e-05	77.93	62.08	14.93	21.64
chr20	43726361	43726677	317	*	5.36605	6.05447	4.00198	1.5607	4.6435e-07	5.11898e-05	73.28	59.65	11.2	20.84
chr20	2073610	2074241	632	*	6.31182	6.85265	5.43664	1.21945	4.6551e-07	5.11898e-05	133.76	97.39	45.74	40.88
chr10	85963886	85964241	356	*	6.16873	6.72935	5.2394	1.26294	4.66235e-07	5.11898e-05	122.13	90.08	35.47	40.08
chr9	81475969	81476398	430	*	5.33767	3.90164	6.04291	-1.60866	4.66558e-07	5.11898e-05	11.63	18.26	70.94	60.93
chr2	217561387	217561815	429	*	6.1961	5.27512	6.75374	-1.25728	4.71419e-07	5.16395e-05	36.06	41.39	109.21	106.62
chr5	174162910	174163420	511	*	6.08945	6.65559	5.1445	1.27785	4.76471e-07	5.21085e-05	113.99	87.65	35.47	35.27
chr7	50244937	50245408	472	*	5.85332	6.44844	4.82239	1.35067	4.80325e-07	5.24453e-05	91.89	82.78	31.74	24.85
chr9	136114398	136114920	523	*	7.44365	7.83311	6.90853	0.855488	4.82482e-07	5.25959e-05	244.26	211.81	112.01	128.27
chr12	99784401	99784855	455	*	5.50937	6.15538	4.30899	1.46723	4.8999e-07	5.33286e-05	75.6	66.95	19.6	20.04
chr1	150592256	150592622	367	*	4.94798	3.16031	5.72228	-1.76148	4.9243e-07	5.35081e-05	8.14	9.74	49.47	56.12
chr6	161459056	161459476	421	*	5.2651	3.77622	5.98206	-1.63434	4.94433e-07	5.36396e-05	12.79	14.61	55.07	71.35
chr12	30610617	30611003	387	*	5.66018	4.45802	6.30669	-1.46885	4.98307e-07	5.39735e-05	23.26	20.69	70.94	87.38
chr12	6444772	6445208	437	*	5.93247	4.8964	6.52926	-1.34967	5.10472e-07	5.51581e-05	27.91	31.65	93.34	91.39
chr4	41260854	41261258	405	*	5.59833	4.34255	6.25938	-1.50147	5.10874e-07	5.51581e-05	17.45	23.13	85.87	67.34
chr8	47829247	47829808	562	*	6.92573	7.37217	6.27584	0.990491	5.17675e-07	5.58034e-05	177.96	153.38	75.6	79.36
chr12	120904373	120904716	344	*	6.12777	5.18358	6.69363	-1.27541	5.30004e-07	5.70416e-05	33.73	38.95	103.61	103.41
chr20	41820596	41820961	366	*	6.55574	7.04903	5.80025	1.10284	5.30858e-07	5.70428e-05	141.9	122.95	56.94	54.51
chr10	11557579	11557993	415	*	5.63043	4.41933	6.27941	-1.47048	5.36155e-07	5.74766e-05	22.1	20.69	84.01	71.35
chr2	200604394	200604944	551	*	6.46462	5.62191	6.9931	-1.18185	5.36593e-07	5.74766e-05	54.67	43.82	140.94	113.84
chrX	101409206	101409532	327	*	4.74391	5.51674	2.96491	1.7545	5.39084e-07	5.76522e-05	46.52	45.04	8.4	7.21
chr9	12329305	12329805	501	*	6.75117	7.22993	6.02963	1.07207	5.39948e-07	5.76535e-05	166.33	133.91	73.74	56.92
chr4	115299453	115299891	439	*	5.6609	4.41384	6.31963	-1.49037	5.47548e-07	5.8373e-05	25.59	17.04	92.41	67.34
chr5	153008662	153009167	506	*	5.67024	4.4957	6.30899	-1.44652	5.49391e-07	5.84773e-05	24.43	20.69	78.41	80.17
chr10	32059210	32059617	408	*	6.14632	6.69887	5.2394	1.24064	5.52098e-07	5.86302e-05	112.82	94.95	35.47	40.08
chr8	26231470	26232047	578	*	7.0641	6.43926	7.49867	-0.960909	5.52559e-07	5.86302e-05	89.56	84	188.55	173.16
chr1	5890800	5891129	330	*	4.6802	5.47698	2.7521	1.81261	5.53909e-07	5.86814e-05	47.69	41.39	10.27	3.21
chr12	100452194	100452626	433	*	5.25954	3.76763	5.97715	-1.62678	5.56363e-07	5.88493e-05	16.28	10.96	69.07	56.92
chr17	78958604	78958897	294	*	5.06355	3.4175	5.81243	-1.69889	5.60149e-07	5.91453e-05	11.63	9.74	52.27	60.12
chr11	10319866	10320207	342	*	4.97982	3.25123	5.74387	-1.73185	5.60909e-07	5.91453e-05	9.3	9.74	55.07	52.11
chr3	54180579	54181070	492	*	6.53182	7.029	5.76703	1.11179	5.63724e-07	5.93497e-05	141.9	119.3	56	52.91
chr19	33167169	33167852	684	*	5.54489	6.18089	4.37994	1.44197	5.79708e-07	6.08857e-05	73.28	71.82	22.4	19.24
chr19	54926336	54926882	547	*	6.58359	7.07921	5.82254	1.10783	5.80112e-07	6.08857e-05	152.37	118.08	57.87	55.31
chr2	144857157	144857600	444	*	4.8904	3.05859	5.67204	-1.76748	5.83822e-07	6.11802e-05	8.14	8.52	52.27	49.7
chr16	89400028	89400416	389	*	6.02927	5.02601	6.61532	-1.31955	5.86812e-07	6.13985e-05	38.38	26.78	94.27	101.81
chr1	201914296	201914784	489	*	6.0959	5.10581	6.67754	-1.30702	6.00546e-07	6.27385e-05	37.22	31.65	115.74	88.98
chr21	9908971	9909909	939	*	5.81432	6.40903	4.78467	1.34058	6.04988e-07	6.31052e-05	88.4	81.56	27.07	28.06
chr2	76826794	76827339	546	*	5.88228	6.47478	4.85943	1.33838	6.08702e-07	6.33949e-05	101.19	76.69	30.8	27.26
chr1	68577452	68577919	468	*	6.1862	5.27006	6.74209	-1.24729	6.12812e-07	6.37249e-05	41.87	35.3	108.27	105.82
chr1	183925788	183926146	359	*	4.8928	3.06327	5.67406	-1.76579	6.1469e-07	6.38222e-05	6.98	9.74	47.6	54.51
chr15	45427479	45427841	363	*	5.60853	6.24328	4.44795	1.43094	6.24187e-07	6.4709e-05	66.3	85.21	19.6	24.05
chr16	69832379	69832725	347	*	5.49653	4.19799	6.1687	-1.51889	6.28246e-07	6.50301e-05	22.1	14.61	76.54	67.34
chr17	45819980	45820401	422	*	5.99741	6.57704	5.01329	1.31021	6.30812e-07	6.5115e-05	108.17	82.78	37.34	27.26
chr21	45875709	45876169	461	*	6.02673	6.59532	5.07475	1.27981	6.30989e-07	6.5115e-05	108.17	85.21	34.54	32.87
chr4	153381570	153381977	408	*	4.8494	2.93898	5.64349	-1.7865	6.36148e-07	6.55474e-05	10.47	4.87	49.47	50.5
chr19	30348882	30349376	495	*	6.81053	7.27006	6.13224	1.01957	6.42064e-07	6.60517e-05	167.49	141.21	68.14	72.15
chr20	669414	669947	534	*	5.09446	5.81381	3.59449	1.62897	6.42993e-07	6.60517e-05	67.46	45.04	12.13	12.02
chr11	65236316	65236690	375	*	6.26814	6.79654	5.42563	1.1811	6.48175e-07	6.64831e-05	113.99	108.34	41.07	44.89
chr7	155205307	155205908	602	*	6.92516	7.38518	6.24578	1.01947	6.4948e-07	6.65162e-05	191.91	142.43	70	81.77
chr10	23983774	23984214	441	*	5.03156	5.75505	3.51217	1.64305	6.5057e-07	6.65271e-05	59.32	48.69	14	8.82
chr14	54805389	54805839	451	*	6.00915	5.01098	6.59351	-1.31684	6.5821e-07	6.71425e-05	26.75	37.74	96.14	97
chr1	10574451	10574910	460	*	5.92228	4.86124	6.52703	-1.35991	6.58571e-07	6.71425e-05	32.57	25.56	102.67	81.77
chr3	13461702	13462260	559	*	4.64711	5.45624	2.6346	1.80754	6.60178e-07	6.72052e-05	48.85	38.95	2.8	9.62
chr20	3098561	3098957	397	*	6.34416	5.47347	6.88332	-1.20493	6.61589e-07	6.72477e-05	52.34	36.52	122.27	113.84
chr8	139711018	139711482	465	*	5.79294	6.39681	4.73467	1.36637	6.63782e-07	6.73694e-05	93.05	75.47	30.8	22.45
chr11	117110042	117110494	453	*	5.92454	4.8964	6.51876	-1.33798	6.66638e-07	6.7558e-05	27.91	31.65	95.21	88.18
chr14	36993428	36993732	305	*	5.3366	6.01489	4.01379	1.52895	6.71477e-07	6.79466e-05	72.11	57.21	13.07	19.24
chr2	242331441	242331927	487	*	5.84068	4.77193	6.44785	-1.36809	6.73994e-07	6.80996e-05	29.08	25.56	84.01	90.59
chr22	43624374	43624723	350	*	6.24841	6.78579	5.38242	1.20255	6.8393e-07	6.90005e-05	123.29	97.39	40.14	43.29
chr1	154968177	154968514	338	*	5.82457	4.70767	6.44648	-1.39965	6.85474e-07	6.90534e-05	27.91	24.35	99.87	74.55
chr1	152423702	152424079	378	*	5.20961	5.90521	3.81537	1.57918	7.02338e-07	7.06471e-05	66.3	53.56	17.73	10.42
chr15	39875649	39876000	352	*	5.8686	4.80232	6.47499	-1.36323	7.05166e-07	7.06806e-05	30.24	25.56	96.14	81.77
chr11	2320492	2320941	450	*	5.53401	6.16819	4.37537	1.43178	7.0527e-07	7.06806e-05	74.44	69.39	21.47	20.04
chr4	3794531	3794947	417	*	5.31982	5.99239	4.01966	1.51511	7.06722e-07	7.06806e-05	62.81	64.52	14	18.44
chr15	64648592	64649036	445	*	5.4885	4.21072	6.15532	-1.50752	7.06848e-07	7.06806e-05	15.12	21.91	72.8	69.74
chr14	29237188	29237749	562	*	5.61916	6.25966	4.43846	1.45461	7.20043e-07	7.18938e-05	81.42	71.82	28.94	14.43
chr1	41826713	41827511	799	*	7.04104	7.46731	6.43335	0.942609	7.28009e-07	7.25821e-05	189.59	164.34	88.67	84.17
chr1	18475459	18475901	443	*	4.7268	5.50089	2.94036	1.73687	7.31163e-07	7.27894e-05	41.87	48.69	6.53	8.82
chr19	51830905	51831281	377	*	5.4852	6.12997	4.28927	1.45762	7.33066e-07	7.28718e-05	76.77	63.3	21.47	17.64
chr2	33258592	33258971	380	*	5.92638	4.89114	6.5229	-1.33889	7.41655e-07	7.36051e-05	32.57	26.78	98.94	84.98
chr19	42585680	42586112	433	*	5.86936	4.79811	6.47731	-1.36608	7.42618e-07	7.36051e-05	33.73	21.91	86.81	91.39
chr8	87797425	87797769	345	*	5.80625	6.42319	4.70583	1.38702	7.44109e-07	7.36451e-05	104.68	66.95	23.33	28.86
chr1	179560710	179561497	788	*	5.85087	6.4462	4.81932	1.3355	7.49299e-07	7.40504e-05	97.7	76.69	25.2	31.26
chr12	328785	329554	770	*	7.79923	8.14653	7.3409	0.755519	7.5377e-07	7.43837e-05	298.92	267.81	150.28	173.96
chr17	27229797	27230483	687	*	8.80741	9.07525	8.47824	0.579301	7.56816e-07	7.45755e-05	568.77	510.06	384.56	328.68
chr4	155547835	155548329	495	*	6.90578	7.34926	6.26218	0.977885	7.66177e-07	7.52227e-05	159.35	166.77	70.94	82.57
chr7	16697627	16697941	315	*	4.70735	2.55331	5.53542	-1.84094	7.66692e-07	7.52227e-05	9.3	2.43	49.47	43.29
chr12	6729446	6730224	779	*	7.84807	8.18545	7.40689	0.737264	7.66717e-07	7.52227e-05	305.9	276.33	178.28	161.13
chr10	103061231	103061535	305	*	5.9996	6.57275	5.03448	1.27979	7.7089e-07	7.55227e-05	94.21	96.17	27.07	38.48
chr10	95801741	95802155	415	*	5.00788	3.34448	5.76004	-1.69358	7.73702e-07	7.56886e-05	8.14	12.17	52.27	56.12
chr5	172940622	172941002	381	*	5.09342	3.49743	5.83258	-1.66225	7.82036e-07	7.63935e-05	11.63	10.96	63.47	50.5
chr19	56320704	56321218	515	*	6.05147	6.62072	5.09761	1.27345	7.99027e-07	7.79408e-05	112.82	84	30.8	37.68
chr14	106873349	106873968	620	*	7.016	7.4471	6.39837	0.953785	8.10626e-07	7.89585e-05	190.75	158.25	87.74	80.97
chr19	55953797	55954230	434	*	4.91838	5.66487	3.28481	1.67105	8.23289e-07	8.00766e-05	43.04	58.43	7.47	12.02
chr10	1757955	1758341	387	*	5.00951	5.73723	3.46992	1.63321	8.29499e-07	8.05649e-05	61.65	45.04	9.33	12.83
chr1	70902256	70902759	504	*	5.10357	3.50778	5.84269	-1.66214	8.3181e-07	8.06736e-05	8.14	14.61	63.47	51.31
chr13	108520509	108521079	571	*	5.89464	6.4761	4.90509	1.3072	8.35318e-07	8.08293e-05	97.7	80.34	32.67	27.26
chr3	140769855	140770349	495	*	6.23112	6.77086	5.35886	1.21162	8.38085e-07	8.08293e-05	119.8	98.6	47.6	34.47
chr8	142427460	142428337	878	*	5.42112	6.07054	4.20845	1.46004	8.3817e-07	8.08293e-05	67.46	66.95	17.73	19.24
chr9	135923892	135924398	507	*	5.75098	4.63728	6.37193	-1.39371	8.39988e-07	8.08293e-05	29.08	20.69	83.07	82.57
chr4	113687609	113687975	367	*	5.76778	4.6752	6.38232	-1.37971	8.4035e-07	8.08293e-05	26.75	24.35	85.87	80.97
chr18	13800898	13801348	451	*	6.29799	6.81832	5.47615	1.16149	8.40579e-07	8.08293e-05	119.8	105.91	45.74	43.29
chr3	123443103	123443487	385	*	5.3845	4.05389	6.06473	-1.52972	8.43148e-07	8.09614e-05	18.61	14.61	68.14	65.74
chr2	192623564	192624034	471	*	6.23578	5.36023	6.77675	-1.20862	8.47945e-07	8.13066e-05	39.55	42.61	111.07	108.22
chr19	19106512	19107002	491	*	6.51644	5.72142	7.02605	-1.13199	8.51001e-07	8.13701e-05	60.48	45.04	137.21	123.46
chr22	37894292	37894806	515	*	6.06469	6.61616	5.16075	1.23284	8.51011e-07	8.13701e-05	100.03	96.17	35.47	36.07
chr3	9768634	9769254	621	*	6.44752	6.95529	5.65706	1.12706	8.57132e-07	8.18398e-05	133.76	114.43	44.8	56.12
chr4	19852563	19852946	384	*	4.87658	3.05389	5.65673	-1.7423	8.65129e-07	8.2487e-05	9.3	7.3	56	44.89
chr7	155191624	155192064	441	*	5.85176	6.43745	4.84958	1.31229	8.72214e-07	8.29917e-05	94.21	79.13	28	29.66
chr22	29755384	29755982	599	*	6.47968	5.69153	6.9865	-1.12807	8.72874e-07	8.29917e-05	54.67	48.69	121.34	132.27
chr19	20108356	20108860	505	*	6.18511	6.71902	5.32824	1.19193	8.78266e-07	8.33872e-05	102.35	108.34	41.07	39.28
chr17	9023754	9024226	473	*	5.73951	6.36283	4.6179	1.40662	9.0017e-07	8.53472e-05	98.87	65.74	29.87	19.24
chr8	139712612	139713027	416	*	5.8704	6.45023	4.88566	1.30187	9.02718e-07	8.54691e-05	87.23	87.65	32.67	26.45
chr8	56014664	56014986	323	*	4.90649	5.6412	3.33276	1.65233	9.19711e-07	8.69201e-05	52.34	47.48	12.13	8.02
chr2	95719310	95719692	383	*	4.92432	5.65869	3.3523	1.64219	9.21642e-07	8.69201e-05	52.34	48.69	8.4	12.02
chr16	88905371	88905946	576	*	5.49429	6.14024	4.29412	1.45571	9.21895e-07	8.69201e-05	81.42	59.65	22.4	16.83
chr1	195686685	195687185	501	*	6.09268	5.05035	6.69148	-1.33704	9.28841e-07	8.73663e-05	40.71	25.56	124.14	82.57
chr1	205641260	205641584	325	*	4.84437	5.60236	3.1494	1.70372	9.30384e-07	8.73663e-05	56.99	40.17	12.13	5.61
chrX	36975393	36976010	618	*	4.99806	5.7343	3.41676	1.64784	9.305e-07	8.73663e-05	66.3	40.17	9.33	12.02
chr17	75084584	75085028	445	*	7.0963	6.49743	7.51824	-0.927997	9.43954e-07	8.85068e-05	93.05	87.65	189.48	177.17
chr1	238027588	238027974	387	*	5.47997	6.11907	4.30418	1.43289	9.51832e-07	8.9122e-05	73.28	65.74	18.67	20.84
chr1	110672874	110673285	412	*	5.58571	6.21254	4.45229	1.4048	9.54857e-07	8.92818e-05	82.58	65.74	20.53	23.25
chr19	3852722	3853035	314	*	5.33445	6.01368	4.0079	1.51889	9.56729e-07	8.93335e-05	74.44	54.78	12.13	20.04
chr1	150785509	150785991	483	*	6.65986	5.93422	7.1404	-1.06424	9.60558e-07	8.95674e-05	66.3	56	141.88	140.29
chr15	50651021	50651426	406	*	5.00689	3.34833	5.75813	-1.6816	9.64769e-07	8.98363e-05	6.98	13.39	56.94	51.31
chr14	94291276	94291684	409	*	4.67669	5.45535	2.86298	1.73319	9.70559e-07	9.02514e-05	50.01	37.74	6.53	8.02
chr14	106410833	106411251	419	*	5.26837	5.95104	3.92792	1.52457	9.76798e-07	9.06948e-05	61.65	62.08	11.2	19.24
chr1	50513431	50513998	568	*	5.26852	5.94661	3.94653	1.51961	9.78008e-07	9.06948e-05	69.79	53.56	14	16.83
chr7	89252347	89252754	408	*	5.66865	6.2824	4.57867	1.37116	9.82946e-07	9.1028e-05	81.42	74.26	20.53	27.26
chr2	27472957	27473507	551	*	7.24912	7.64579	6.7002	0.868953	9.86279e-07	9.1212e-05	208.2	192.34	98.94	109.03
chr12	108168996	108169434	439	*	5.06963	5.77479	3.63395	1.57757	1.004e-06	9.27239e-05	53.5	56	11.2	13.63
chr9	96190223	96190598	376	*	5.28219	5.94978	4.00147	1.49879	1.00673e-06	9.28495e-05	63.97	59.65	16.8	15.23
chr8	14068520	14068907	388	*	6.00501	6.56905	5.06603	1.26385	1.01689e-06	9.36589e-05	104.68	85.21	37.34	29.66
chr14	94598656	94598998	343	*	6.12144	5.15154	6.69623	-1.28036	1.01948e-06	9.37702e-05	41.87	29.22	117.61	89.79
chr2	96783588	96783866	279	*	5.1777	5.86393	3.82268	1.53601	1.02854e-06	9.44746e-05	60.48	56	13.07	15.23
chr15	22436036	22436359	324	*	4.48898	5.29662	2.48697	1.7862	1.04195e-06	9.55007e-05	37.22	41.39	5.6	5.61
chr10	131977858	131978536	679	*	5.55058	4.33094	6.2019	-1.45777	1.04253e-06	9.55007e-05	24.43	15.83	71.87	75.36
chr12	62829396	62829829	434	*	6.58427	5.8152	7.08325	-1.10444	1.04417e-06	9.55214e-05	65.13	47.48	143.74	127.46
chr6	74508215	74508667	453	*	6.15385	5.25123	6.70484	-1.22994	1.0473e-06	9.56354e-05	37.22	38.95	98.01	110.63
chr2	148747354	148747927	574	*	5.95167	4.94914	6.53747	-1.30736	1.04933e-06	9.56354e-05	32.57	29.22	100.81	84.98
chr5	11903686	11904394	709	*	6.12795	6.68034	5.22146	1.23034	1.04965e-06	9.56354e-05	117.48	87.65	34.54	40.08
chr8	140641296	140641597	302	*	4.92929	5.65714	3.38904	1.63047	1.07066e-06	9.74188e-05	54.67	46.26	12.13	8.82
chr10	106402420	106402820	401	*	6.70039	7.1618	6.01795	1.02093	1.08729e-06	9.87991e-05	150.04	136.34	66.27	63.33
chr17	8906699	8907024	326	*	4.81907	5.56822	3.17156	1.66795	1.10535e-06	0.000100305	53.5	41.39	8.4	9.62
chr1	226411299	226411857	559	*	6.41653	6.92108	5.63395	1.11676	1.10775e-06	0.000100389	127.94	114.43	44.8	54.51
chrX	139173434	139173978	545	*	5.03504	5.74309	3.5866	1.58077	1.11233e-06	0.000100669	52.34	54.78	11.2	12.83
chr5	54523030	54523502	473	*	6.53012	7.01324	5.79855	1.06978	1.11608e-06	0.000100873	124.45	133.91	56	55.31
chr2	177053483	177054022	540	*	4.82193	5.57562	3.15032	1.67124	1.12726e-06	0.000101748	43.04	52.35	6.53	11.22
chr1	152371534	152372051	518	*	5.35316	6.01489	4.09483	1.477	1.15155e-06	0.000103802	72.11	57.21	14.93	19.24
chr3	104347007	104347507	501	*	6.1521	5.19906	6.72107	-1.26448	1.15944e-06	0.000104204	43.04	30.43	120.41	90.59
chr11	116476263	116476884	622	*	6.13196	6.6811	5.23436	1.21996	1.16022e-06	0.000104204	115.15	90.08	33.6	41.69
chr18	46548177	46548569	393	*	6.03294	6.59068	5.11166	1.23797	1.16062e-06	0.000104204	95.38	97.39	29.87	39.28
chr12	121497780	121498851	1072	*	7.08265	6.47522	7.50879	-0.935512	1.1864e-06	0.000106377	100.03	77.91	183.88	180.37
chr1	13840379	13840727	349	*	5.04378	5.7662	3.52944	1.60835	1.20068e-06	0.000107515	67.46	41.39	10.27	12.83
chr4	123653406	123654101	696	*	6.10241	5.17927	6.66082	-1.24404	1.21154e-06	0.000108344	38.38	34.09	93.34	109.03
chr15	73617579	73617969	391	*	5.26124	5.9406	3.93415	1.51072	1.23407e-06	0.000110213	54.67	68.17	12.13	18.44
chr13	100611819	100612238	420	*	5.60774	6.24351	4.44358	1.4169	1.23734e-06	0.00011036	91.89	59.65	18.67	24.85
chr9	130717607	130718102	496	*	5.40768	6.05624	4.19813	1.44468	1.24235e-06	0.000110527	69.79	63.3	15.87	20.84
chr14	78173560	78174294	735	*	5.86405	4.83071	6.45996	-1.32848	1.24249e-06	0.000110527	32.57	24.35	83.07	92.99
chr8	143690401	143690964	564	*	6.09009	6.63238	5.21102	1.205	1.2829e-06	0.000113973	104.68	93.73	36.4	37.68
chr1	160651167	160651742	576	*	6.2066	6.73597	5.36157	1.17143	1.32269e-06	0.000117354	101.19	111.99	37.34	44.89
chr3	169379694	169380676	983	*	8.1039	8.40772	7.71856	0.655999	1.3318e-06	0.000118007	340.79	338.42	207.21	214.04
chr16	56623003	56623905	903	*	5.53282	6.15593	4.41192	1.39226	1.35156e-06	0.000119485	74.44	68.17	23.33	19.24
chr1	2838570	2838993	424	*	5.2316	5.90521	3.92739	1.50458	1.35201e-06	0.000119485	66.3	53.56	16.8	13.63
chr1	153250321	153250775	455	*	6.05142	6.60397	5.1445	1.22877	1.36336e-06	0.000120331	109.33	85.21	35.47	35.27
chr7	150865258	150865674	417	*	7.40327	7.78597	6.8809	0.837931	1.37462e-06	0.000121167	245.42	195.99	119.47	116.24
chr14	106829296	106829706	411	*	5.53095	6.15483	4.40745	1.39241	1.37972e-06	0.000121459	76.77	65.74	22.4	20.04
chrX	124339357	124339784	428	*	4.88192	5.63492	3.21402	1.66025	1.39544e-06	0.000122683	61.65	37.74	6.53	12.02
chr9	92981797	92982192	396	*	6.15803	6.69737	5.28683	1.20029	1.40878e-06	0.000123695	117.48	90.08	42	36.07
chr12	127765146	127765743	598	*	7.87333	8.20602	7.44017	0.719748	1.41487e-06	0.000124068	309.39	281.2	160.54	186.79
chr8	103284619	103285082	464	*	5.5541	4.33869	6.20426	-1.44647	1.41803e-06	0.000124185	19.77	20.69	84.94	62.53
chr22	42158968	42159475	508	*	6.40387	6.90081	5.63968	1.09768	1.42295e-06	0.000124455	122.13	116.86	47.6	52.11
chr19	21385673	21386154	482	*	6.26349	6.78579	5.43664	1.16016	1.43149e-06	0.00012504	123.29	97.39	45.74	40.88
chr3	184802630	184803050	421	*	5.67666	4.56987	6.29553	-1.37706	1.43335e-06	0.000125041	25.59	21.91	79.34	77.76
chr6	1524157	1524603	447	*	6.80231	7.27245	6.10038	1.036	1.4519e-06	0.000126497	182.61	126.6	63.47	73.75
chr18	5023143	5023725	583	*	5.84785	6.42774	4.86298	1.2865	1.45766e-06	0.000126835	93.05	79.13	26.14	32.07
chr1	13843688	13844153	466	*	5.90075	6.46797	4.95268	1.2594	1.46689e-06	0.000127474	93.05	84	29.87	32.07
chr13	27231041	27231462	422	*	4.91906	3.25123	5.67204	-1.66276	1.47617e-06	0.000128117	9.3	9.74	52.27	49.7
chr10	115086177	115086761	585	*	5.52353	4.29264	6.17792	-1.45373	1.48024e-06	0.000128305	20.94	18.26	83.07	61.73
chr14	90526631	90527171	541	*	7.30708	7.68841	6.78726	0.833392	1.4838e-06	0.000128449	211.69	200.86	111.07	109.83
chr7	41926501	41926950	450	*	5.65813	4.53073	6.28318	-1.38857	1.49642e-06	0.000129376	26.75	19.48	81.21	74.55
chr8	144302499	144302913	415	*	5.64244	6.24815	4.57833	1.35063	1.50077e-06	0.000129587	81.42	70.6	26.14	21.64
chr11	42546143	42546552	410	*	5.52049	6.15209	4.37079	1.40579	1.51203e-06	0.000130393	82.58	59.65	20.53	20.84
chr19	15979825	15980268	444	*	6.10718	6.64919	5.22887	1.20713	1.51672e-06	0.000130631	107.01	93.73	42.94	32.07
chr7	15594880	15595312	433	*	5.15092	3.64824	5.87085	-1.59462	1.52957e-06	0.00013157	10.47	14.61	68.14	48.9
chr3	150320979	150321680	702	*	6.18608	5.31388	6.72579	-1.19491	1.55021e-06	0.000133176	43.04	36.52	108.27	103.41
chr11	117350119	117350456	338	*	5.20788	5.88026	3.90853	1.4919	1.55845e-06	0.000133715	58.16	59.65	14	16.03
chrX	39021727	39022063	337	*	4.46791	5.27006	2.50382	1.75331	1.57145e-06	0.00013466	41.87	35.3	6.53	4.81
chr12	56324455	56325051	597	*	6.71633	6.00368	7.1912	-1.04428	1.58142e-06	0.000135343	67.46	60.87	162.41	129.87
chr12	69292900	69293379	480	*	6.20257	5.33579	6.74024	-1.18961	1.5859e-06	0.000135555	43.04	37.74	112.01	101.81
chr8	142937949	142938506	558	*	4.83634	5.57069	3.26434	1.62647	1.58847e-06	0.000135603	50.01	45.04	11.2	8.02
chr17	8735891	8736432	542	*	7.31131	7.69539	6.78632	0.841236	1.59967e-06	0.000136387	220.99	193.55	115.74	105.02
chr7	139190323	139190753	431	*	6.15017	6.68377	5.29412	1.18675	1.60604e-06	0.000136758	107.01	98.6	44.8	33.67
chr1	62319284	62319632	349	*	4.77365	2.94914	5.55409	-1.70977	1.61641e-06	0.000137468	8.14	7.3	46.67	47.3
chr10	102329367	102329900	534	*	5.30549	5.96516	4.05488	1.46026	1.63526e-06	0.000138741	61.65	63.3	14	19.24
chr19	30018250	30018561	312	*	5.32124	5.97605	4.08878	1.45885	1.63548e-06	0.000138741	67.46	58.43	19.6	14.43
chr22	46786463	46786995	533	*	5.78016	4.70168	6.39037	-1.35222	1.63758e-06	0.000138746	32.57	19.48	86.81	80.97
chr8	143592223	143592716	494	*	4.50007	5.29463	2.5866	1.73316	1.64642e-06	0.00013932	39.55	38.95	5.6	6.41
chr13	107172909	107173353	445	*	5.43954	4.15374	6.10843	-1.48131	1.66135e-06	0.000140187	19.77	15.83	80.27	57.72
chr5	3591068	3591396	329	*	4.35658	5.17927	2.24442	1.78116	1.66265e-06	0.000140187	38.38	34.09	4.67	4.81
chr11	2449303	2449901	599	*	7.2256	7.61924	6.68249	0.859284	1.66288e-06	0.000140187	208.2	185.03	98.01	107.42
chr14	85881565	85881952	388	*	5.34761	4.05624	6.01795	-1.48575	1.70388e-06	0.000143465	17.45	15.83	66.27	63.33
chr19	33716511	33716922	412	*	4.99476	5.7266	3.4352	1.60368	1.70896e-06	0.000143714	52.34	53.56	5.6	16.03
chr17	10782454	10782786	333	*	5.27884	5.93614	4.03713	1.45881	1.72125e-06	0.000144391	62.81	59.65	16.8	16.03
chr17	43890734	43891089	356	*	5.47796	6.11512	4.30899	1.41452	1.72128e-06	0.000144391	81.42	57.21	19.6	20.04
chr1	18526615	18526940	326	*	4.15164	5.02721	1.55461	1.85035	1.72743e-06	0.000144728	37.22	28	1.87	4.01
chr5	65790328	65790634	307	*	4.69681	5.45713	2.98904	1.67457	1.74723e-06	0.000146206	47.69	40.17	10.27	5.61
chr4	108587340	108587693	354	*	5.10874	3.64198	5.82086	-1.57277	1.75857e-06	0.000146973	12.79	12.17	56.94	56.12
chr5	134187003	134187443	441	*	5.59645	4.45624	6.22528	-1.39406	1.78103e-06	0.000148625	24.43	19.48	71.87	77.76
chr5	70896701	70897551	851	*	6.34772	5.53916	6.86277	-1.13815	1.78272e-06	0.000148625	41.87	51.13	121.34	111.43
chr16	71475273	71475832	560	*	6.64363	7.11991	5.92779	1.04335	1.8128e-06	0.000150946	143.06	135.12	50.4	71.35
chr3	195474667	195475153	487	*	6.51568	6.99178	5.80025	1.04922	1.82416e-06	0.000151275	127.94	126.6	56.94	54.51
chr11	46148597	46149103	507	*	5.82818	4.80092	6.42212	-1.3141	1.82511e-06	0.000151275	31.4	24.35	90.54	80.97
chr12	108064806	108065270	465	*	6.89464	7.32512	6.27829	0.94454	1.8253e-06	0.000151275	170.98	149.73	77.47	77.76
chrX	17878868	17879471	604	*	5.2105	5.8885	3.88887	1.50476	1.82569e-06	0.000151275	69.79	48.69	16.8	12.83
chr10	59777544	59777973	430	*	4.73151	2.8252	5.52497	-1.72351	1.8308e-06	0.000151513	9.3	4.87	50.4	41.69
chr3	12412288	12412697	410	*	5.12288	3.65135	5.83605	-1.57496	1.84064e-06	0.000152142	9.3	15.83	59.74	54.51
chr10	98945270	98946014	745	*	5.15453	5.83688	3.81537	1.51592	1.84718e-06	0.000152496	54.67	59.65	17.73	10.42
chr9	20611700	20612213	514	*	5.19687	3.77622	5.8986	-1.54887	1.85183e-06	0.000152694	12.79	14.61	67.2	52.11
chr19	42205489	42205965	477	*	5.47679	6.10524	4.33787	1.39229	1.85796e-06	0.000152839	75.6	62.08	19.6	20.84
chr4	8588308	8588759	452	*	5.11712	5.81071	3.7314	1.52977	1.85811e-06	0.000152839	46.52	65.74	12.13	14.43
chr4	138452228	138452720	493	*	5.80365	4.7705	6.3995	-1.31786	1.89157e-06	0.000155403	30.24	24.35	88.67	80.17
chr2	36935381	36935861	481	*	5.5	4.21072	6.16979	-1.48086	1.89909e-06	0.000155832	15.12	21.91	88.67	55.31
chr2	241580408	241580768	361	*	6.3852	6.87926	5.62787	1.09163	1.92476e-06	0.000157746	119.8	115.65	53.2	45.69
chr2	241165209	241165745	537	*	5.36174	6.0049	4.17156	1.42163	1.95082e-06	0.000159476	65.13	63.3	16.8	19.24
chr4	53848743	53849106	364	*	5.54808	4.3852	6.18349	-1.40877	1.95141e-06	0.000159476	17.45	24.35	70	75.36
chr6	12045013	12045683	671	*	6.06486	5.15593	6.61815	-1.22202	1.95293e-06	0.000159476	37.22	34.09	102.67	93.79
chr19	42828416	42828780	365	*	6.11043	6.64394	5.25462	1.17572	1.96839e-06	0.000160387	96.54	103.47	35.47	40.88
chr3	127550635	127551133	499	*	6.73463	7.20012	6.04315	1.02124	1.97058e-06	0.000160387	167.49	126.6	59.74	72.15
chr5	6583024	6583746	723	*	7.36371	7.75007	6.83446	0.843291	1.97119e-06	0.000160387	243.09	187.47	112.01	116.24
chr12	128872319	128872725	407	*	4.99031	5.6938	3.56199	1.55505	1.98646e-06	0.000161435	51.18	52.35	14	9.62
chr14	74768738	74769114	377	*	5.90034	4.9243	6.47722	-1.27607	1.98909e-06	0.000161455	29.08	31.65	92.41	85.78
chr15	25092141	25092519	379	*	4.60432	5.3777	2.82211	1.69143	1.99423e-06	0.000161678	44.2	38.95	9.33	4.81
chr1	18626232	18626637	406	*	6.10936	6.64159	5.2569	1.17868	2.01176e-06	0.000162853	103.52	96.17	42	34.47
chr1	3200378	3200947	570	*	6.98017	7.39982	6.38593	0.915985	2.01353e-06	0.000162853	170.98	166.77	77.47	89.79
chr20	44941196	44941494	299	*	5.01884	5.72142	3.59449	1.54849	2.02677e-06	0.000163545	60.48	45.04	12.13	12.02
chr12	132990535	132990974	440	*	7.26774	7.65414	6.73839	0.846282	2.0275e-06	0.000163545	210.52	192.34	115.74	97.8
chr2	208352689	208353161	473	*	5.65641	4.53073	6.28094	-1.38183	2.02933e-06	0.000163545	26.75	19.48	68.14	87.38
chr5	143571607	143572055	449	*	5.46109	4.24506	6.11142	-1.43588	2.03351e-06	0.000163686	22.1	15.83	70.94	67.34
chr4	8963062	8963450	389	*	6.17687	6.71141	5.31834	1.18673	2.03917e-06	0.000163822	100.03	109.56	48.54	31.26
chr6	168756506	168756983	478	*	5.36194	6.00368	4.17683	1.41882	2.04003e-06	0.000163822	67.46	60.87	17.73	18.44
chr1	179836802	179837301	500	*	6.4493	5.65248	6.95964	-1.1228	2.05424e-06	0.000164767	61.65	38.95	122.27	126.66
chr16	74684665	74685481	817	*	6.13314	5.20225	6.69431	-1.23633	2.10414e-06	0.00016857	39.55	34.09	121.34	85.78
chr4	144452496	144452999	504	*	5.40004	4.10354	6.07169	-1.47891	2.10766e-06	0.000168652	19.77	14.61	78.41	56.12
chr1	154158569	154159002	434	*	6.08343	6.65132	5.13348	1.2579	2.11747e-06	0.000169237	126.78	74.26	37.34	32.87
chr19	2253052	2253522	471	*	5.87726	6.4462	4.92426	1.26024	2.12117e-06	0.000169334	97.7	76.69	32.67	28.06
chr19	6710564	6711039	476	*	5.02503	5.72364	3.6179	1.54293	2.15596e-06	0.000171816	56.99	48.69	14.93	9.62
chr2	220941345	220941789	445	*	5.61596	4.49396	6.2394	-1.37716	2.15734e-06	0.000171816	25.59	19.48	70.94	80.17
chr20	61846348	61846832	485	*	6.37429	5.56657	6.88901	-1.13128	2.19585e-06	0.000174671	55.83	38.95	123.21	113.84
chr9	127208936	127209633	698	*	6.75823	7.20714	6.10303	0.986418	2.19835e-06	0.000174671	162.84	132.69	70.94	66.54
chr11	116086484	116086830	347	*	5.31149	5.97729	4.03763	1.45998	2.2133e-06	0.000175653	65.13	60.87	11.2	21.64
chr22	37522872	37523400	529	*	5.65273	6.25659	4.59449	1.33489	2.22021e-06	0.000175994	88.4	64.52	24.27	24.05
chr6	30043029	30043982	954	*	6.63967	7.09615	5.96807	1.00191	2.25571e-06	0.0001786	136.08	137.56	63.47	61.73
chr4	159499605	159499988	384	*	5.63104	4.5341	6.24692	-1.35861	2.31413e-06	0.000183011	24.43	21.91	76.54	75.36
chr1	4645218	4645665	448	*	5.39806	6.0308	4.24442	1.39548	2.33321e-06	0.000184046	67.46	63.3	18.67	19.24
chr7	51255711	51256091	381	*	5.16321	5.83414	3.8695	1.47613	2.33393e-06	0.000184046	59.32	54.78	14	15.23
chr20	50929888	50930278	391	*	6.01808	5.0893	6.5785	-1.2385	2.33537e-06	0.000184046	27.91	40.17	93.34	97.8
chr2	153483818	153484260	443	*	5.49949	4.28864	6.1484	-1.42713	2.34308e-06	0.000184439	23.26	15.83	79.34	62.53
chr2	106071193	106071637	445	*	5.66209	4.57644	6.27451	-1.35208	2.34603e-06	0.000184456	20.94	26.78	80.27	74.55
chr15	43479710	43480149	440	*	6.02984	5.01999	6.61806	-1.29312	2.35133e-06	0.000184624	44.2	20.69	108.27	88.18
chr2	223779560	223780341	782	*	5.99824	5.05389	6.56417	-1.24556	2.35362e-06	0.000184624	37.22	29.22	102.67	86.58
chr3	38669375	38669920	546	*	6.68008	7.13706	6.00739	1.0062	2.3676e-06	0.000185486	150.04	131.47	70.94	57.72
chr16	20371365	20371737	373	*	4.95445	5.68546	3.39885	1.59209	2.37099e-06	0.000185486	63.97	38.95	7.47	13.63
chr13	26624147	26625237	1091	*	5.75182	6.33531	4.75623	1.29208	2.37282e-06	0.000185486	87.23	74.26	30.8	23.25
chr14	94517396	94518069	674	*	5.72774	4.67979	6.32834	-1.32664	2.38934e-06	0.000186562	23.26	28	76.54	84.17
chr16	30626592	30627186	595	*	6.49026	6.98115	5.74047	1.07613	2.40419e-06	0.000187505	141.9	110.78	47.6	59.32
chr10	43761288	43761722	435	*	6.09618	6.63198	5.23436	1.17721	2.40724e-06	0.000187526	105.84	92.52	33.6	41.69
chr9	10612838	10613341	504	*	6.1442	6.66697	5.31616	1.15296	2.4211e-06	0.000188389	105.84	97.39	42	37.68
chr13	52019067	52019464	398	*	4.86423	3.16031	5.62386	-1.64879	2.43712e-06	0.000189418	8.14	9.74	56.94	41.69
chr11	59569787	59570485	699	*	5.50166	4.33676	6.13765	-1.40078	2.44456e-06	0.000189779	20.94	19.48	71.87	68.94
chr15	85360257	85361066	810	*	6.19397	6.71029	5.38222	1.13906	2.49136e-06	0.00019319	103.52	105.91	45.74	37.68
chr2	181848538	181848853	316	*	5.0283	3.487	5.75638	-1.58628	2.50566e-06	0.000194077	15.12	7.3	56	52.11
chr2	62220543	62221002	460	*	5.75822	4.70618	6.36012	-1.32379	2.52283e-06	0.000195184	29.08	23.13	90.54	73.75
chr11	132812633	132813043	411	*	5.31044	5.97294	4.04915	1.45192	2.53171e-06	0.000195647	73.28	52.35	13.07	20.04
chr16	33764046	33764328	283	*	4.93293	5.64042	3.48697	1.54841	2.5544e-06	0.000197175	53.5	46.26	11.2	11.22
chr8	56727607	56728022	416	*	5.07283	3.57644	5.79141	-1.56882	2.5953e-06	0.000200104	10.47	13.39	63.47	47.3
chrX	139590168	139590522	355	*	3.9951	4.89509	1.09483	1.82835	2.64e-06	0.000203319	29.08	30.43	1.87	2.4
chr19	29218397	29218869	473	*	5.37783	6.0167	4.20286	1.41145	2.66223e-06	0.000204798	68.62	60.87	22.4	14.43
chr22	47609235	47609843	609	*	7.08221	7.49926	6.49322	0.915359	2.68761e-06	0.000206516	202.38	159.47	100.81	79.36
chr20	22228559	22229040	482	*	4.65314	5.41659	2.92792	1.64602	2.69389e-06	0.000206763	47.69	37.74	5.6	9.62
chr7	158488712	158489136	425	*	5.56114	4.42116	6.1899	-1.38181	2.70737e-06	0.000207563	20.94	21.91	80.27	65.74
chr7	23509265	23509634	370	*	4.99877	5.69304	3.61014	1.52286	2.72664e-06	0.000208804	52.34	51.13	14	10.42
chr20	749367	749836	470	*	4.95122	5.65714	3.51217	1.54775	2.74293e-06	0.000209814	54.67	46.26	14	8.82
chr12	562585	563019	435	*	6.60734	7.07329	5.91484	1.02134	2.76251e-06	0.000211073	150.04	119.3	59.74	60.93
chr17	47296964	47297322	359	*	6.09738	6.62588	5.25462	1.15908	2.77966e-06	0.000212144	97.7	99.82	35.47	40.88
chr18	10016052	10016517	466	*	5.62585	4.53242	6.24065	-1.35166	2.79325e-06	0.000212916	25.59	20.69	71.87	79.36
chr4	170487425	170487920	496	*	6.04177	5.07313	6.61613	-1.25914	2.79607e-06	0.000212916	44.2	23.13	106.41	89.79
chr22	41633372	41634147	776	*	7.11735	7.51193	6.57244	0.858777	2.82381e-06	0.000214788	186.1	178.95	93.34	97
chr2	232660159	232660639	481	*	5.87563	4.85855	6.46624	-1.29474	2.87219e-06	0.000218222	34.89	23.13	99.87	76.96
chr11	63971981	63972393	413	*	6.4102	5.63885	6.91011	-1.09636	2.90162e-06	0.000220211	55.83	43.82	113.87	126.66
chr1	1534702	1535195	494	*	5.94128	6.50238	5.01059	1.233	2.90897e-06	0.000220522	105.84	75.47	30.8	33.67
chr1	27213560	27214032	473	*	5.95438	4.94153	6.5436	-1.29056	2.91558e-06	0.000220775	39.55	21.91	106.41	80.17
chr7	139303611	139304283	673	*	6.58576	5.86728	7.06319	-1.045	2.93947e-06	0.000222336	54.67	62.08	145.61	121.85
chr4	181830380	181830804	425	*	4.88928	5.62032	3.33356	1.57977	2.9808e-06	0.00022521	56.99	41.39	6.53	13.63
chr7	152890151	152890495	345	*	5.25338	5.91655	3.98956	1.45151	3.00443e-06	0.000226511	72.11	48.69	14.93	16.83
chr6	113443137	113443535	399	*	5.66859	4.56822	6.28551	-1.35151	3.00471e-06	0.000226511	26.75	20.69	88.67	67.34
chr7	100317500	100317944	445	*	5.95867	5.0308	6.51876	-1.22942	3.0154e-06	0.000227064	33.73	31.65	95.21	88.18
chr17	59385454	59385945	492	*	5.33307	4.04917	6.00147	-1.45978	3.03106e-06	0.000227901	20.94	12.17	67.2	60.93
chr7	42312832	42313235	404	*	5.85644	4.87063	6.43664	-1.27548	3.035e-06	0.000227901	24.43	34.09	91.47	81.77
chr17	29700152	29700566	415	*	5.86939	4.89246	6.44658	-1.26605	3.03661e-06	0.000227901	31.4	28	94.27	80.17
chr12	47940780	47941228	449	*	5.7927	4.7365	6.39593	-1.32082	3.04924e-06	0.000228352	31.4	21.91	97.07	71.35
chr1	18700391	18700745	355	*	5.01602	5.70693	3.64159	1.50764	3.04937e-06	0.000228352	56.99	47.48	12.13	12.83
chr9	124094221	124094688	468	*	5.42648	4.21283	6.07616	-1.42541	3.06014e-06	0.000228905	13.96	23.13	70	64.93
chr6	41159292	41159789	498	*	6.71268	7.1562	6.06898	0.971367	3.10934e-06	0.000232329	147.72	137.56	70.94	63.33
chr7	135186194	135186630	437	*	4.91995	3.34448	5.65501	-1.59299	3.13854e-06	0.000234252	8.14	12.17	49.47	51.31
chr2	133426885	133427441	557	*	5.79284	6.37135	4.81199	1.27662	3.15426e-06	0.000235166	77.93	87.65	34.54	21.64
chr2	238001781	238002212	432	*	5.97538	5.05624	6.53235	-1.22135	3.16884e-06	0.000235993	34.89	31.65	96.14	88.98
chrX	130809626	130809945	320	*	4.87113	5.58661	3.38904	1.55806	3.18247e-06	0.000236748	53.5	42.61	12.13	8.82
chr5	176127219	176127678	460	*	6.13246	6.6583	5.29654	1.1588	3.22801e-06	0.000239872	105.84	96.17	45.74	32.87
chr5	178016777	178018078	1302	*	7.70233	8.04498	7.25208	0.740283	3.24989e-06	0.000241233	289.62	238.6	143.74	161.13
chr17	71706197	71706671	475	*	6.28965	6.80057	5.49138	1.11791	3.25496e-06	0.000241345	126.78	96.17	41.07	48.9
chr20	21686393	21686757	365	*	4.90133	5.60959	3.45192	1.54349	3.26197e-06	0.000241582	46.52	51.13	13.07	8.82
chr5	173998498	173999048	551	*	5.89138	4.91785	6.46741	-1.26101	3.2653e-06	0.000241582	34.89	25.56	95.21	81.77
chr16	85132851	85133323	473	*	5.78103	6.3495	4.82938	1.24659	3.26999e-06	0.000241665	79.09	84	28	28.86
chr9	140917329	140917744	416	*	4.71763	5.47082	3.04866	1.62484	3.27674e-06	0.0002419	55.83	32.87	9.33	7.21
chr6	29653495	29653930	436	*	4.60483	5.37581	2.83662	1.64647	3.28065e-06	0.000241925	46.52	36.52	4.67	9.62
chr1	2460550	2461165	616	*	5.39226	6.03942	4.18774	1.41067	3.29301e-06	0.000242444	76.77	54.78	14	22.45
chr9	94909292	94909681	390	*	4.81569	3.0726	5.5823	-1.64635	3.29486e-06	0.000242444	4.65	12.17	54.14	41.69
chr4	187858230	187858664	435	*	5.12129	3.71066	5.82071	-1.52028	3.32648e-06	0.000244505	12.79	13.39	62.54	50.5
chr14	75614115	75614662	548	*	5.52004	4.34833	6.15798	-1.39866	3.33203e-06	0.000244648	13.96	26.78	74.67	68.14
chr4	39466784	39467075	292	*	4.56948	2.57972	5.37537	-1.70659	3.34512e-06	0.000245137	4.65	7.3	42.94	40.08
chr17	79504431	79505023	593	*	6.73845	7.196	6.06449	1.00643	3.34594e-06	0.000245137	159.35	133.91	79.34	54.51
chr12	54718312	54718834	523	*	7.02729	6.448	7.43948	-0.896586	3.35548e-06	0.000245571	93.05	81.56	176.41	170.75
chr4	141247547	141247916	370	*	6.39464	5.62508	6.89381	-1.09132	3.36028e-06	0.000245656	50.01	48.69	128.81	109.03
chr1	86316002	86316391	390	*	4.82006	3.15593	5.57235	-1.61808	3.37011e-06	0.000245858	9.3	8.52	49.47	45.69
chr7	94674878	94675297	420	*	5.37812	4.15154	6.03133	-1.42648	3.3703e-06	0.000245858	20.94	14.61	63.47	67.34
chr10	94766150	94766609	460	*	5.73817	4.6752	6.34353	-1.32397	3.3768e-06	0.000246067	26.75	24.35	94.27	68.14
chr14	93579159	93579987	829	*	7.19817	6.60035	7.6196	-0.914741	3.41427e-06	0.000248344	119.8	74.26	208.15	185.18
chr2	47664440	47665148	709	*	5.4935	4.33869	6.12658	-1.38442	3.41849e-06	0.000248344	19.77	20.69	75.6	64.13
chr12	58386752	58387165	414	*	5.68737	4.63885	6.28815	-1.31502	3.42117e-06	0.000248344	27.91	21.91	79.34	76.96
chr17	33939910	33940365	456	*	6.2324	5.41933	6.74925	-1.1314	3.42272e-06	0.000248344	44.2	41.39	110.14	105.02
chr8	24010739	24011258	520	*	4.7091	2.83619	5.49735	-1.6759	3.44831e-06	0.000249933	6.98	7.3	55.07	35.27
chr17	62598538	62598933	396	*	4.99763	3.49049	5.71852	-1.55848	3.4655e-06	0.00025091	13.96	8.52	53.2	52.11
chr11	92929887	92930511	625	*	5.71312	4.67214	6.31148	-1.3103	3.48144e-06	0.000251794	29.08	21.91	74.67	84.17
chr18	68449077	68449539	463	*	5.38894	6.0161	4.25441	1.37448	3.52768e-06	0.000254866	69.79	59.65	20.53	17.64
chr5	82812768	82813198	431	*	4.47638	2.22638	5.31616	-1.74335	3.56205e-06	0.000257075	8.14	1.22	42	37.68
chr8	140353070	140353541	472	*	6.42958	6.91817	5.68519	1.07073	3.57785e-06	0.000257941	138.41	103.47	53.2	49.7
chr13	20558825	20559279	455	*	6.20641	5.38239	6.72759	-1.1413	3.59058e-06	0.000258583	38.38	45.04	110.14	101.81
chr7	28311915	28312392	478	*	6.62521	5.92043	7.09662	-1.02726	3.60652e-06	0.000259455	65.13	56	150.28	123.46
chr1	18902094	18902458	365	*	5.12321	5.79074	3.84269	1.45721	3.6153e-06	0.000259557	53.5	57.21	15.87	12.83
chr10	64182069	64182522	454	*	4.96441	3.41384	5.69439	-1.57271	3.61719e-06	0.000259557	12.79	8.52	57.87	45.69
chr15	78164430	78164753	324	*	5.54499	6.15703	4.46058	1.34689	3.61944e-06	0.000259557	72.11	70.6	28	16.03
chr1	2688795	2689248	454	*	5.40292	6.03259	4.25981	1.37133	3.63894e-06	0.000260679	63.97	66.95	15.87	22.45
chr13	28534253	28534818	566	*	6.47481	6.94914	5.76339	1.04025	3.67108e-06	0.000262703	130.27	116.86	59.74	48.9
chr11	72635606	72636053	448	*	5.61828	4.5341	6.23024	-1.33681	3.67876e-06	0.000262975	24.43	21.91	81.21	68.94
chr4	48485758	48486386	629	*	5.51583	6.1283	4.43005	1.3398	3.73853e-06	0.000266966	80.26	59.65	21.47	21.64
chr12	125721551	125722135	585	*	6.50707	6.97636	5.80706	1.02819	3.77152e-06	0.000269038	133.76	118.08	60.67	51.31
chr17	70330357	70330732	376	*	4.62609	2.69565	5.42323	-1.68151	3.80302e-06	0.000270999	9.3	3.65	45.74	40.08
chr19	4547439	4547891	453	*	6.38056	6.86359	5.64918	1.05717	3.81126e-06	0.000271301	122.13	110.78	52.27	48.1
chr1	178313514	178313995	482	*	5.66991	4.60155	6.27696	-1.32424	3.81912e-06	0.000271575	29.08	19.48	82.14	72.95
chr1	146552328	146552705	378	*	4.52911	5.32075	2.6346	1.66685	3.84088e-06	0.000272836	34.89	45.04	2.8	9.62
chr5	11384685	11385420	736	*	5.31235	5.95546	4.12238	1.40515	3.86291e-06	0.000274112	53.5	70.6	19.6	15.23
chr12	94018	94701	684	*	7.25659	7.63071	6.75014	0.812226	3.88026e-06	0.000275055	193.08	203.29	111.07	104.22
chr1	56314593	56314973	381	*	5.15616	3.76476	5.85109	-1.50265	3.90515e-06	0.000276531	17.45	9.74	62.54	52.91
chr11	2906150	2906583	434	*	7.0379	7.44228	6.47402	0.880177	3.91503e-06	0.00027694	189.59	158.25	89.61	88.18
chr4	107187356	107187779	424	*	5.71509	4.66907	6.31507	-1.30912	3.95424e-06	0.000279388	31.4	19.48	77.47	81.77
chr14	91821220	91821658	439	*	5.89345	6.45802	4.95295	1.22857	3.95789e-06	0.000279388	93.05	82.78	24.27	37.68
chr14	55368894	55370183	1290	*	7.42679	7.78394	6.95108	0.773433	3.96542e-06	0.000279628	232.62	208.16	123.21	124.26
chr1	156329750	156330123	374	*	5.88848	4.95041	6.4522	-1.23254	3.97611e-06	0.00028009	31.4	30.43	87.74	87.38
chr5	33470590	33471072	483	*	5.39578	4.20649	6.0387	-1.40203	3.99918e-06	0.000281423	17.45	19.48	62.54	68.94
chr15	87167792	87168163	372	*	5.34306	5.9887	4.14404	1.41488	4.03415e-06	0.000283343	69.79	57.21	23.33	12.02
chr17	12920885	12921468	584	*	5.76443	6.35212	4.75623	1.28926	4.03484e-06	0.000283343	98.87	64.52	30.8	23.25
chr12	84902165	84902712	548	*	6.31673	5.4957	6.83674	-1.13313	4.04449e-06	0.000283726	48.85	41.39	131.61	97
chr16	60907	61217	311	*	6.38881	6.87045	5.66066	1.05306	4.06711e-06	0.000284923	124.45	109.56	52.27	48.9
chr22	50714481	50715051	571	*	7.71015	8.03735	7.28628	0.707448	4.06996e-06	0.000284923	271.01	254.42	161.48	150.71
chr2	112425116	112425502	387	*	5.58519	4.49396	6.19932	-1.33955	4.0869e-06	0.000285734	25.59	19.48	70	76.96
chr19	17190824	17191322	499	*	6.34238	5.5496	6.85109	-1.1083	4.08999e-06	0.000285734	53.5	40.17	125.07	105.82
chr1	206934794	206935150	357	*	4.50664	2.40279	5.32824	-1.70947	4.12716e-06	0.000288033	8.14	2.43	41.07	39.28
chr14	60981519	60982211	693	*	7.36897	7.73568	6.87605	0.793916	4.14109e-06	0.000288708	230.3	195.99	113.87	121.05
chr15	78912277	78912668	392	*	5.6274	6.21412	4.62209	1.28239	4.18977e-06	0.000291801	79.09	69.39	25.2	24.05
chr16	3222117	3222681	565	*	4.73436	5.47347	3.13865	1.5895	4.20329e-06	0.000292442	52.34	36.52	11.2	6.41
chr19	18366002	18366351	350	*	5.08348	5.76011	3.76733	1.46176	4.27402e-06	0.000297057	51.18	57.21	11.2	16.03
chr1	18543857	18544295	439	*	5.53035	6.1322	4.47847	1.3107	4.29786e-06	0.000298123	72.11	68.17	20.53	24.05
chr13	53383248	53383844	597	*	5.95683	6.497	5.08343	1.17804	4.29815e-06	0.000298123	94.21	86.43	31.74	36.07
chr15	85369526	85370068	543	*	5.93909	6.49309	5.02817	1.2143	4.3288e-06	0.000299941	104.68	75.47	36.4	28.86
chr12	55386963	55387630	668	*	6.6002	5.90782	7.06609	-1.01381	4.33477e-06	0.000300048	61.65	58.43	143.74	124.26
chr11	7926498	7926964	467	*	5.10026	3.62624	5.81397	-1.5323	4.36093e-06	0.00030155	18.61	6.09	58.8	53.71
chr3	111296592	111297027	436	*	6.20041	5.37487	6.7222	-1.13771	4.36733e-06	0.000301684	47.69	35.3	104.54	106.62
chr19	50990119	50990643	525	*	6.63362	7.09157	5.95881	0.999538	4.37437e-06	0.000301863	154.69	118.08	63.47	60.93
chr6	32064282	32065010	729	*	5.54991	6.14577	4.51669	1.30003	4.41185e-06	0.000303638	69.79	71.82	23.33	22.45
chr21	43378111	43378596	486	*	5.33047	4.11035	5.98193	-1.41605	4.41296e-06	0.000303638	16.28	18.26	60.67	65.74
chr12	133136230	133136449	220	*	4.29864	5.10808	2.28398	1.69486	4.41355e-06	0.000303638	34.89	34.09	6.53	3.21
chr16	88058607	88058884	278	*	4.62608	2.70767	5.42139	-1.67156	4.41855e-06	0.000303673	6.98	6.09	33.6	52.11
chr7	35470021	35470568	548	*	6.24121	6.74126	5.46955	1.09454	4.42576e-06	0.000303861	110.5	103.47	48.54	40.08
chr18	31019974	31020801	828	*	6.49171	6.96329	5.78654	1.02479	4.44554e-06	0.000304909	130.27	119.3	49.47	60.93
chr3	98306879	98307358	480	*	5.01645	3.56987	5.72407	-1.52388	4.45247e-06	0.000305075	12.79	10.96	50.4	55.31
chr2	15888797	15889229	433	*	5.60186	6.19188	4.5866	1.2848	4.48344e-06	0.000306886	75.6	70.6	22.4	25.65
chr3	141021118	141021434	317	*	4.61849	2.72552	5.40988	-1.66574	4.54501e-06	0.000310787	3.49	9.74	40.14	44.89
chr5	102728765	102729180	416	*	4.67789	2.8252	5.46292	-1.65136	4.55027e-06	0.000310833	9.3	4.87	51.34	36.88
chr1	152843483	152844169	687	*	6.67272	7.1283	6.00308	0.99233	4.58738e-06	0.000313052	160.51	119.3	62.54	65.74
chr13	49306100	49306521	422	*	6.4541	6.92863	5.74224	1.0312	4.61513e-06	0.000314556	126.78	116.86	48.54	58.52
chr18	14178578	14179145	568	*	5.63085	6.22381	4.60658	1.28937	4.61995e-06	0.000314556	83.74	65.74	21.47	27.26
chr3	51853685	51854134	450	*	6.05198	6.60075	5.15543	1.19677	4.62337e-06	0.000314556	118.64	75.47	33.6	37.68
chr9	130912779	130913287	509	*	6.17418	6.68339	5.38014	1.10903	4.63688e-06	0.000315159	108.17	97.39	39.2	44.09
chr15	40659972	40660715	744	*	8.67975	8.93059	8.37592	0.537407	4.64971e-06	0.000315487	504.79	471.11	350.96	313.45
chr11	119883885	119884471	587	*	6.53692	6.99682	5.8578	1.00358	4.65103e-06	0.000315487	134.92	120.52	60.67	55.31
chr13	63086308	63086756	449	*	5.55116	6.14743	4.51669	1.29918	4.662e-06	0.000315915	66.3	75.47	23.33	22.45
chr19	3228663	3228987	325	*	5.27317	5.91785	4.07757	1.40139	4.67495e-06	0.000316476	69.79	51.13	17.73	16.03
chr17	75092474	75093000	527	*	6.47552	5.72586	6.96636	-1.06735	4.68719e-06	0.000316882	53.5	52.35	141.88	108.22
chr20	62733181	62733890	710	*	7.71153	8.06033	7.25057	0.758218	4.69032e-06	0.000316882	298.92	234.94	169.88	134.68
chr9	115473347	115473795	449	*	5.94814	5.02601	6.50618	-1.21524	4.70604e-06	0.000317627	38.38	26.78	89.61	92.19
chr12	86036630	86037013	384	*	5.04081	3.58298	5.75094	-1.52742	4.72824e-06	0.000318808	8.14	15.83	58.8	48.9
chr5	113641215	113641719	505	*	6.37763	5.62746	6.86869	-1.07185	4.76833e-06	0.000321191	46.52	52.35	111.07	122.65
chr16	33618819	33619463	645	*	6.60899	7.05771	5.95422	0.975649	4.77339e-06	0.000321212	133.76	132.69	60.67	63.33
chr21	16146112	16146448	337	*	5.14927	5.82865	3.82211	1.47531	4.78796e-06	0.00032181	68.62	45.04	18.67	9.62
chr14	107150575	107151116	542	*	5.28175	5.93038	4.07193	1.40735	4.79178e-06	0.00032181	73.28	48.69	16.8	16.83
chr12	12798361	12798954	594	*	5.76803	4.77479	6.35073	-1.26824	4.81401e-06	0.000322983	26.75	28	88.67	74.55
chr12	130511051	130511492	442	*	5.65216	6.24815	4.61856	1.29085	4.86442e-06	0.000326041	81.42	70.6	18.67	30.46
chr13	53226786	53227378	593	*	6.88705	6.28189	7.31208	-0.923924	4.87778e-06	0.000326613	82.58	73.04	150.28	167.55
chr16	49924753	49925155	403	*	5.3425	5.97418	4.1925	1.37515	4.92413e-06	0.000329391	70.95	54.78	20.53	16.03
chr2	17081695	17082031	337	*	4.9655	5.65559	3.59449	1.4867	4.98951e-06	0.000333435	56.99	43.82	12.13	12.02
chr2	243153677	243154172	496	*	7.46322	7.81807	6.99161	0.769602	5.0502e-06	0.000336954	215.18	236.16	139.08	115.44
chr3	127192025	127192448	424	*	5.41616	6.0308	4.3233	1.33885	5.05212e-06	0.000336954	67.46	63.3	22.4	17.64
chr9	135526544	135527053	510	*	5.66384	4.59994	6.26948	-1.31303	5.09245e-06	0.00033931	30.24	18.26	82.14	72.15
chr10	50369645	50369999	355	*	5.23638	3.94407	5.90695	-1.44683	5.10421e-06	0.000339758	18.61	12.17	55.07	64.93
chr7	47365858	47366266	409	*	5.5562	4.45267	6.17409	-1.33846	5.21623e-06	0.000346623	26.75	17.04	74.67	69.74
chr17	45922249	45922580	332	*	5.8818	4.94661	6.44449	-1.22337	5.21757e-06	0.000346623	34.89	26.78	86.81	87.38
chr17	56347835	56348319	485	*	4.89768	5.60316	3.46058	1.51851	5.2923e-06	0.000351243	55.83	41.39	14	8.02
chr1	221651339	221651842	504	*	6.85649	6.24918	7.28257	-0.923702	5.31133e-06	0.000351966	79.09	73.04	161.48	149.91
chr12	26452113	26452612	500	*	5.40795	4.25123	6.04159	-1.37324	5.31359e-06	0.000351966	18.61	19.48	64.4	67.34
chr9	100616823	100617247	425	*	5.07504	5.746	3.78122	1.44479	5.36599e-06	0.000355071	47.69	59.65	13.07	14.43
chr19	54445207	54445778	572	*	5.34197	5.96579	4.2187	1.3537	5.37096e-06	0.000355071	60.48	64.52	19.6	17.64
chr22	49059096	49059489	394	*	5.43538	6.05859	4.31418	1.34402	5.40952e-06	0.000357271	65.13	68.17	14.93	24.85
chr1	111149836	111150201	366	*	5.09698	5.75939	3.83605	1.43051	5.41733e-06	0.000357438	52.34	56	14.93	13.63
chr7	8473247	8473757	511	*	5.06981	5.73943	3.78122	1.4426	5.42457e-06	0.000357567	58.16	48.69	13.07	14.43
chr4	6310578	6311361	784	*	5.22932	5.88784	3.98305	1.42797	5.48725e-06	0.000361347	70.95	47.48	19.6	12.02
chr17	43845354	43845680	327	*	4.64112	5.37958	3.04866	1.57061	5.50769e-06	0.000362125	41.87	41.39	9.33	7.21
chr17	32854720	32855338	619	*	5.26538	5.91591	4.04866	1.40946	5.51877e-06	0.000362125	73.28	47.48	18.67	14.43
chr1	22029685	22030331	647	*	5.57605	4.50261	6.18469	-1.32081	5.5191e-06	0.000362125	19.77	25.56	76.54	68.94
chr6	27219437	27219954	518	*	6.62225	7.07358	5.96186	0.98304	5.52046e-06	0.000362125	148.88	120.52	65.34	59.32
chr4	5981735	5982141	407	*	6.1819	6.69531	5.37746	1.12257	5.53443e-06	0.00036269	97.7	109.56	49.47	33.67
chr13	26706929	26707285	357	*	5.49139	4.37581	6.11291	-1.34596	5.57249e-06	0.000364831	23.26	18.26	66.27	72.15
chr3	151097107	151097521	415	*	5.52861	4.36826	6.16329	-1.36908	5.57933e-06	0.000364926	27.91	13.39	78.41	64.93
chr5	174265300	174265734	435	*	5.83747	4.89114	6.40409	-1.22985	5.66381e-06	0.000370094	32.57	26.78	86.81	82.57
chr20	741526	742161	636	*	7.53129	7.87503	7.07916	0.739357	5.72409e-06	0.000373672	243.09	226.42	126.94	143.5
chr17	40314929	40315520	592	*	6.70585	7.14273	6.07616	0.950203	5.73794e-06	0.000374215	152.37	130.25	70	64.93
chr20	3730338	3730830	493	*	7.05752	7.44889	6.51876	0.848966	5.79816e-06	0.000377779	181.45	167.99	95.21	88.18
chr20	56621771	56622185	415	*	4.79417	3.15593	5.54156	-1.57878	5.8077e-06	0.000377987	9.3	8.52	52.27	40.88
chr13	113622796	113623243	448	*	4.54395	5.32608	2.70916	1.63568	5.81252e-06	0.000377987	54.67	25.56	7.47	5.61
chr7	1962305	1962849	545	*	5.31694	4.10354	5.96656	-1.4002	5.84346e-06	0.000379383	19.77	14.61	62.54	62.53
chr14	54833429	54834052	624	*	6.43395	5.70917	6.91412	-1.04445	5.8452e-06	0.000379383	53.5	51.13	112.94	128.27
chr16	50581249	50581699	451	*	5.11697	5.77408	3.87599	1.41664	5.85669e-06	0.000379765	54.67	54.78	14.93	14.43
chr3	68056911	68057450	540	*	5.23696	5.89246	4.00198	1.4058	5.86282e-06	0.000379799	62.81	56	11.2	20.84
chr6	168308669	168309180	512	*	5.52827	4.36637	6.16341	-1.36865	5.89179e-06	0.00038131	29.08	12.17	72.8	70.55
chr3	146535509	146535912	404	*	4.91562	3.42116	5.63379	-1.52948	5.92006e-06	0.000382774	10.47	10.96	50.4	48.9
chr16	70403942	70404476	535	*	6.46925	5.73723	6.95255	-1.04729	5.92832e-06	0.000382943	61.65	45.04	130.68	117.04
chr17	76130301	76130821	521	*	6.74788	7.17873	6.13077	0.936492	5.97465e-06	0.000385567	155.86	133.91	72.8	67.34
chr7	16965768	16966327	560	*	6.6666	6.00063	7.1205	-0.983868	6.02352e-06	0.000388173	73.28	54.78	137.21	141.09
chr7	38787554	38788286	733	*	6.10612	5.27309	6.63083	-1.13933	6.0265e-06	0.000388173	38.38	38.95	103.61	94.6
chr8	105690813	105691255	443	*	6.14688	5.3129	6.67196	-1.13796	6.12046e-06	0.00039385	44.2	35.3	110.14	93.79
chr12	108920658	108921157	500	*	5.39339	4.14271	6.05308	-1.41416	6.28697e-06	0.000404181	25.59	9.74	71.87	60.93
chr17	18223096	18223558	463	*	5.94939	5.05976	6.4956	-1.18687	6.31608e-06	0.000405667	31.4	35.3	85.87	94.6
chr15	71167272	71167833	562	*	6.36996	5.6235	6.85943	-1.06079	6.33643e-06	0.000406589	52.34	46.26	123.21	109.03
chr18	54376695	54377089	395	*	5.0048	3.56327	5.71128	-1.50373	6.36909e-06	0.000408297	15.12	8.52	49.47	55.31
chr14	107198653	107199265	613	*	5.35859	5.97667	4.25441	1.33782	6.37817e-06	0.000408339	66.3	59.65	20.53	17.64
chr7	155364332	155364669	338	*	4.40334	5.18251	2.5866	1.62147	6.3818e-06	0.000408339	34.89	37.74	5.6	6.41
chr3	185973457	185973800	344	*	5.45785	6.06646	4.3845	1.31973	6.43977e-06	0.000411659	75.6	58.43	23.33	18.44
chr1	41705948	41706300	353	*	4.74202	3.04917	5.49963	-1.5876	6.46059e-06	0.0004126	10.47	6.09	50.4	40.08
chr1	154732824	154733403	580	*	7.20929	7.59532	6.68064	0.833448	6.46991e-06	0.000412806	216.34	170.43	96.14	109.03
chr22	48884920	48885267	348	*	4.89969	5.60155	3.47847	1.49476	6.533e-06	0.000416439	58.16	38.95	10.27	12.02
chr12	126536098	126536496	399	*	5.53915	4.46335	6.14852	-1.31734	6.54543e-06	0.000416753	19.77	24.35	73.74	68.14
chr14	78630592	78630979	388	*	5.54486	6.1419	4.508	1.29743	6.55025e-06	0.000416753	77.93	63.3	27.07	18.44
chr3	62095074	62095738	665	*	6.26423	5.47522	6.77139	-1.098	6.55729e-06	0.000416809	50.01	38.95	116.67	101.81
chr3	42484188	42484535	348	*	5.53001	6.12075	4.51253	1.27765	6.62557e-06	0.000420755	69.79	69.39	22.4	23.25
chr4	107122451	107122933	483	*	5.9821	5.07893	6.53329	-1.19183	6.63916e-06	0.000421223	38.38	29.22	102.67	82.57
chr1	27286529	27287161	633	*	5.2292	5.87627	4.02501	1.39895	6.6543e-06	0.000421788	65.13	52.35	20.53	12.02
chr1	153793815	153794215	401	*	5.79416	4.83619	6.36484	-1.23503	6.70072e-06	0.00042395	27.91	29.22	88.67	76.16
chr14	26007048	26007426	379	*	4.8588	5.5674	3.40784	1.50271	6.70094e-06	0.00042395	54.67	40.17	8.4	12.83
chr11	9769903	9770486	584	*	6.55677	5.8403	7.03332	-1.03306	6.76179e-06	0.000427401	48.85	65.74	146.54	115.44
chr12	32810258	32810938	681	*	5.70005	4.70917	6.28196	-1.25825	6.84517e-06	0.000432267	26.75	25.56	80.27	75.36
chr2	202047583	202047904	322	*	4.63355	2.8471	5.40764	-1.61265	6.85854e-06	0.000432708	4.65	9.74	39.2	45.69
chr19	11026086	11026583	498	*	5.71144	4.70618	6.29816	-1.2692	6.90525e-06	0.00043525	29.08	23.13	70	87.38
chr8	99224464	99225029	566	*	5.66191	4.64667	6.25192	-1.27587	6.92715e-06	0.000436224	22.1	28	80.27	72.15
chr2	219738034	219738503	470	*	5.05541	5.74852	3.67172	1.48311	6.94379e-06	0.000436865	69.79	37.74	15.87	9.62
chr20	39706953	39707395	443	*	5.76694	4.80512	6.33894	-1.23713	6.95444e-06	0.000436938	27.91	28	84.94	76.96
chr4	54522452	54522900	449	*	6.37471	5.60236	6.87504	-1.08115	6.95786e-06	0.000436938	56.99	40.17	129.74	105.02
chr7	1595781	1596297	517	*	6.39279	6.87527	5.66269	1.04497	7.03904e-06	0.000441626	133.76	101.04	47.6	53.71
chr5	177409060	177409649	590	*	5.8104	6.3588	4.91484	1.18746	7.07164e-06	0.000443261	82.58	81.56	29.87	30.46
chr1	147362327	147362721	395	*	6.34899	6.84436	5.58858	1.07346	7.10774e-06	0.000444726	136.08	93.73	45.74	50.5
chr17	32770864	32771260	397	*	4.76559	5.50645	3.16098	1.55577	7.11335e-06	0.000444726	60.48	30.43	7.47	10.42
chr6	6557098	6557650	553	*	6.79584	7.21924	6.19402	0.916452	7.11473e-06	0.000444726	161.67	136.34	71.87	74.55
chr6	131918487	131919148	662	*	5.2923	4.05153	5.94935	-1.40579	7.12958e-06	0.000445244	19.77	13.39	69.07	54.51
chr1	39052576	39053128	553	*	7.25572	7.63463	6.74039	0.817197	7.14726e-06	0.000445936	222.16	175.3	100.81	113.03
chr5	54620638	54621056	419	*	5.68197	4.64042	6.28053	-1.28925	7.16361e-06	0.000446545	26.75	23.13	90.54	64.93
chr6	80254692	80255169	478	*	5.94645	5.05506	6.49331	-1.18229	7.17832e-06	0.00044705	36.06	30.43	95.21	84.98
chr11	16967388	16967879	492	*	6.74612	7.18398	6.1144	0.945161	7.19055e-06	0.0004474	159.35	131.47	61.6	76.96
chr5	38781107	38781504	398	*	4.90218	3.4175	5.61823	-1.51526	7.21945e-06	0.000448786	11.63	9.74	48.54	49.7
chr19	5369859	5370343	485	*	7.11266	7.50475	6.57252	0.84527	7.2731e-06	0.00045134	198.89	164.34	87.74	102.61
chr2	36922936	36923337	402	*	5.34708	4.12162	5.99999	-1.40292	7.27387e-06	0.00045134	10.47	24.35	66.27	61.73
chr14	107082977	107083283	307	*	4.93757	5.62667	3.57069	1.46276	7.28883e-06	0.000451854	47.69	51.13	9.33	14.43
chr16	85859008	85859307	300	*	4.84757	5.5496	3.42563	1.49035	7.30037e-06	0.000452156	53.5	40.17	10.27	11.22
chr17	49938336	49938715	380	*	5.38179	6.01126	4.2394	1.35326	7.34121e-06	0.000454269	79.09	49.91	17.73	20.04
chr13	34374267	34374731	465	*	5.51016	4.4248	6.12249	-1.32005	7.36577e-06	0.000455373	18.61	24.35	72.8	66.54
chr20	1489867	1490382	516	*	5.41891	4.29463	6.04303	-1.34295	7.40174e-06	0.000456944	19.77	19.48	65.34	66.54
chr1	38484440	38484976	537	*	5.66676	4.64355	6.25938	-1.27756	7.40468e-06	0.000456944	24.43	25.56	85.87	67.34
chr8	110986462	110987037	576	*	6.10158	6.62191	5.27972	1.12338	7.45114e-06	0.000459392	109.33	87.65	33.6	44.09
chr10	98479489	98480059	571	*	6.15986	6.6662	5.37288	1.10188	7.47022e-06	0.000460149	108.17	94.95	47.6	35.27
chr8	35453004	35453347	344	*	5.10459	5.76011	3.8695	1.4026	7.49015e-06	0.000460957	51.18	57.21	14	15.23
chr14	32694122	32694574	453	*	5.76118	4.80652	6.3307	-1.23151	7.57824e-06	0.000465955	26.75	29.22	78.41	82.57
chr7	6595892	6596211	320	*	4.80694	5.51845	3.34296	1.49961	7.63567e-06	0.000468906	44.2	47.48	7.47	12.83
chr14	105070843	105071375	533	*	4.76597	5.47698	3.30418	1.50336	7.64008e-06	0.000468906	47.69	41.39	9.33	10.42
chr17	60670010	60670475	466	*	4.25967	1.8252	5.11964	-1.69104	7.68923e-06	0.000471495	4.65	2.43	38.27	31.26
chr22	24720951	24721403	453	*	6.14726	5.33579	6.66347	-1.11556	7.72683e-06	0.000473371	43.04	37.74	107.34	95.4
chr7	116355169	116355545	377	*	5.20156	3.90687	5.87275	-1.43498	7.80278e-06	0.000477592	9.3	20.69	57.87	59.32
chr8	93083427	93083907	481	*	5.66241	4.63728	6.25566	-1.27595	7.82735e-06	0.000478663	29.08	20.69	83.07	69.74
chr19	35329207	35330237	1031	*	6.69785	7.13165	6.07463	0.94225	7.90123e-06	0.000482745	146.55	133.91	74.67	60.12
chr11	113601623	113602034	412	*	5.74693	4.77907	6.32102	-1.24005	7.96957e-06	0.000486279	23.26	31.65	82.14	77.76
chr17	74456629	74456999	371	*	6.00343	5.12662	6.54487	-1.16888	7.97344e-06	0.000486279	41.87	28	90.54	96.2
chr11	62608046	62608655	610	*	4.4931	5.24918	2.80861	1.57754	8.01141e-06	0.000488155	39.55	36.52	8.4	5.61
chr19	56820858	56821491	634	*	8.0136	8.32567	7.61484	0.669251	8.03739e-06	0.000489115	362.89	278.77	187.61	204.42
chr10	133915019	133915392	374	*	4.818	5.52988	3.3523	1.5002	8.04162e-06	0.000489115	54.67	37.74	8.4	12.02
chr5	78260710	78261083	374	*	4.81824	3.23886	5.55409	-1.54036	8.08259e-06	0.000491166	12.79	6.09	46.67	47.3
chr11	133900745	133901280	536	*	6.2657	6.78878	5.43683	1.13061	8.10949e-06	0.000492359	139.57	81.56	40.14	46.5
chr12	130765675	130766136	462	*	7.43007	7.78252	6.96269	0.760095	8.12053e-06	0.000492587	241.93	198.42	126.01	123.46
chr11	57409000	57409328	329	*	5.64777	4.64355	6.23414	-1.26323	8.15772e-06	0.0004944	24.43	25.56	78.41	72.15
chr6	4254076	4254643	568	*	6.21541	5.41384	6.72767	-1.10595	8.16647e-06	0.000494488	51.18	34.09	104.54	107.42
chr6	167555647	167556041	395	*	5.99329	6.52205	5.14986	1.14549	8.20231e-06	0.000496214	104.68	79.13	37.34	33.67
chr19	4246662	4247084	423	*	5.95317	5.08239	6.49235	-1.16502	8.21819e-06	0.000496731	34.89	32.87	88.67	91.39
chr18	76746167	76746558	392	*	5.77038	6.32439	4.85943	1.19869	8.22773e-06	0.000496864	87.23	73.04	30.8	27.26
chr12	116453232	116453698	467	*	5.50967	4.41384	6.12522	-1.31957	8.25041e-06	0.00049751	25.59	17.04	74.67	64.93
chr11	108568560	108569019	460	*	6.73232	6.10921	7.16606	-0.93703	8.25313e-06	0.00049751	67.46	70.6	149.34	137.89
chr5	132795713	132796370	658	*	6.67402	7.11302	6.0399	0.954015	8.26885e-06	0.000498014	145.39	131.47	74.67	56.92
chr11	72947892	72948353	462	*	6.67456	7.10751	6.05308	0.938921	8.32515e-06	0.00050096	141.9	133.91	71.87	60.93
chr1	100202602	100203018	417	*	5.83794	4.92172	6.39386	-1.19951	8.37622e-06	0.000503585	31.4	29.22	84.01	84.17
chr12	52789562	52790090	529	*	6.33727	6.81156	5.62595	1.02797	8.38927e-06	0.000503922	116.31	108.34	52.27	46.5
chr10	102503256	102503826	571	*	6.82109	7.23707	6.23425	0.89788	8.44603e-06	0.000506518	160.51	141.21	72.8	77.76
chr4	108015404	108015893	490	*	6.05394	5.19799	6.58751	-1.15047	8.44746e-06	0.000506518	44.2	29.22	96.14	96.2
chr9	613658	614255	598	*	6.98358	6.40949	7.39315	-0.882004	8.48398e-06	0.000508256	87.23	82.78	183.88	152.32
chr14	103857174	103857804	631	*	7.3213	6.81658	7.69447	-0.801423	8.49523e-06	0.000508256	125.62	99.82	220.28	194
chr1	181906146	181906636	491	*	5.23847	5.87494	4.07193	1.3632	8.49896e-06	0.000508256	67.46	49.91	16.8	16.83
chr2	121194550	121195213	664	*	6.62318	7.06704	5.97879	0.960954	8.51937e-06	0.000509027	148.88	119.3	64.4	61.73
chr14	62390070	62390427	358	*	5.76388	4.80372	6.33532	-1.22995	8.53272e-06	0.000509375	29.08	26.78	87.74	73.75
chr12	113750224	113750755	532	*	6.54104	5.86728	6.9985	-0.989122	8.65949e-06	0.00051599	54.67	62.08	130.68	125.06
chr22	34507179	34507718	540	*	6.43375	6.89852	5.74387	1.00627	8.66736e-06	0.00051599	130.27	108.34	55.07	52.11
chr2	208598984	208599389	406	*	5.40031	4.243	6.03411	-1.35367	8.67243e-06	0.00051599	23.26	14.61	70.94	60.12
chr18	49866207	49866576	370	*	4.92823	5.61119	3.5866	1.44696	8.67403e-06	0.00051599	44.2	53.56	11.2	12.83
chr15	45403615	45403930	316	*	4.57526	5.31487	2.97703	1.54757	8.6989e-06	0.000516695	41.87	37.74	9.33	6.41
chr7	158766177	158766503	327	*	4.90813	5.60397	3.51289	1.46643	8.70114e-06	0.000516695	54.67	42.61	8.4	14.43
chr18	60985189	60985736	548	*	6.89701	7.31915	6.29775	0.917841	8.74478e-06	0.000518489	173.3	146.08	92.41	64.93
chr5	6448771	6449625	855	*	4.72135	5.4379	3.23436	1.50479	8.74666e-06	0.000518489	46.52	40.17	8.4	10.42
chr20	42876585	42877143	559	*	6.34444	6.81936	5.63171	1.03028	8.82257e-06	0.000522531	116.31	109.56	55.07	44.09
chr1	39876554	39877007	454	*	6.92748	6.34614	7.3407	-0.889688	8.85296e-06	0.000523872	87.23	75.47	172.68	151.51
chr22	25816979	25817761	783	*	5.42221	6.04001	4.31895	1.31992	8.86907e-06	0.000524368	75.6	56	15.87	24.05
chr6	75119186	75119549	364	*	5.63039	4.60477	6.22379	-1.27323	8.89103e-06	0.000525207	26.75	21.91	82.14	67.34
chr22	30168235	30168802	568	*	5.9531	5.08239	6.49226	-1.16217	8.93866e-06	0.00052756	34.89	32.87	94.27	85.78
chr11	102651058	102651632	575	*	6.31113	5.57152	6.79769	-1.05094	8.97986e-06	0.000528895	48.85	46.26	111.07	111.43
chr12	17092687	17093215	529	*	6.01864	6.53537	5.20588	1.1138	8.98354e-06	0.000528895	94.21	91.3	34.54	39.28
chr4	25769474	25769953	480	*	6.4194	5.70767	6.89388	-1.02365	8.98472e-06	0.000528895	55.83	48.69	123.21	114.64
chr11	64111290	64111658	369	*	6.0156	6.53326	5.2005	1.11955	8.99506e-06	0.000529044	100.03	85.21	38.27	35.27
chr1	19772207	19772738	532	*	5.96529	5.05035	6.52074	-1.19314	9.05054e-06	0.000531379	40.71	25.56	102.67	80.97
chr12	94351492	94351958	467	*	4.84451	3.33289	5.56635	-1.51268	9.05707e-06	0.000531379	11.63	8.52	46.67	48.1
chr4	158093176	158093551	376	*	4.23443	1.8252	5.09181	-1.67289	9.06412e-06	0.000531379	4.65	2.43	34.54	33.67
chr5	178769660	178770026	367	*	6.29294	5.53073	6.78905	-1.07036	9.06616e-06	0.000531379	53.5	38.95	107.34	113.84
chr9	36597327	36597954	628	*	6.33076	5.56905	6.82666	-1.06792	9.12864e-06	0.000534578	52.34	42.61	126.01	101.01
chr7	51230365	51230885	521	*	7.06372	6.52417	7.4555	-0.843739	9.21124e-06	0.000538949	98.87	85.21	175.48	175.56
chr15	68809726	68810173	448	*	5.13836	3.83345	5.81214	-1.42741	9.30823e-06	0.000544154	15.12	13.39	63.47	48.9
chr12	57480296	57480768	473	*	6.01802	5.15593	6.55392	-1.15324	9.32929e-06	0.000544914	37.22	34.09	104.54	83.37
chr19	532594	533215	622	*	6.55451	5.8776	7.01341	-0.988739	9.37048e-06	0.000546848	62.81	54.78	138.14	120.25
chr10	43724498	43725120	623	*	4.76381	5.47434	3.30418	1.4924	9.3822e-06	0.000547061	51.18	37.74	9.33	10.42
chr4	147978076	147978464	389	*	4.72606	3.06327	5.4781	-1.55791	9.41947e-06	0.000548344	6.98	9.74	52.27	36.88
chr6	163602239	163602570	332	*	5.44869	6.05741	4.37498	1.31272	9.42041e-06	0.000548344	67.46	65.74	27.07	14.43
chr2	5813292	5813893	602	*	4.5967	5.35451	2.90273	1.55918	9.43259e-06	0.000548582	46.52	35.3	3.73	11.22
chr12	72676466	72676905	440	*	6.14412	5.31781	6.6662	-1.12426	9.44929e-06	0.000549081	38.38	41.39	115.74	87.38
chr20	37355846	37356147	302	*	5.58198	6.19586	4.49156	1.31058	9.53076e-06	0.00055334	93.05	53.56	17.73	27.26
chr17	76113462	76114029	568	*	6.11141	6.62112	5.31616	1.10231	9.54732e-06	0.000553826	111.66	85.21	42	37.68
chr7	112929140	112929587	448	*	5.86579	4.94534	6.42323	-1.19713	9.59905e-06	0.000556351	36.06	25.56	91.47	80.17
chr1	32599071	32599435	365	*	4.56178	2.70767	5.34704	-1.60017	9.67394e-06	0.000560211	6.98	6.09	48.54	32.87
chr14	23578403	23578828	426	*	6.27165	5.51759	6.76434	-1.06213	9.75911e-06	0.00056466	45.36	46.26	114.81	102.61
chr11	119350397	119350796	400	*	6.75548	6.14577	7.18273	-0.921091	9.81775e-06	0.000567406	69.79	71.82	150.28	140.29
chr4	8689843	8690390	548	*	7.28949	7.65075	6.80643	0.774619	9.82333e-06	0.000567406	204.71	197.21	103.61	120.25
chr10	118568995	118569535	541	*	6.43545	6.89852	5.74933	0.999087	9.83389e-06	0.000567532	130.27	108.34	52.27	55.31
chr6	41410445	41411090	646	*	6.80777	7.22486	6.2187	0.902023	9.86036e-06	0.000568147	162.84	136.34	78.41	70.55
chr10	102397495	102398011	517	*	6.48733	6.94693	5.8089	0.992658	9.86133e-06	0.000568147	138.41	108.34	56	56.12
chr13	50223438	50223812	375	*	4.53111	2.70767	5.31138	-1.59314	9.88627e-06	0.000569099	6.98	6.09	40.14	39.28
chr20	11696645	11697245	601	*	6.22531	5.45891	6.72318	-1.07448	9.95831e-06	0.000572759	45.36	42.61	99.87	111.43
chr15	36501367	36501812	446	*	4.47221	2.57316	5.26455	-1.60734	1.00057e-05	0.000574987	5.82	6.09	39.2	37.68
chr3	89901180	89901533	354	*	4.56798	5.31093	2.95268	1.54069	1.0014e-05	0.000574987	46.52	32.87	7.47	8.02
chr2	180904812	180905184	373	*	4.5972	2.84166	5.36599	-1.57763	1.00713e-05	0.000577784	5.82	8.52	44.8	37.68
chr4	140682521	140683070	550	*	5.44012	4.34255	6.05619	-1.31894	1.01238e-05	0.000580066	17.45	23.13	62.54	70.55
chr12	94469019	94469464	446	*	6.41672	5.70618	6.89068	-1.02091	1.01282e-05	0.000580066	58.16	46.26	119.47	117.84
chr1	26611497	26611974	478	*	6.97408	7.37453	6.41787	0.858881	1.01644e-05	0.000581648	166.33	165.56	75.6	95.4
chr5	157344902	157345386	485	*	6.14111	5.31192	6.66433	-1.12364	1.01854e-05	0.000582357	45.36	34.09	113.87	88.98
chr7	140714638	140715130	493	*	7.0445	6.50626	7.43559	-0.841369	1.02725e-05	0.000586841	95.38	86.43	175.48	170.75
chr19	49575816	49576212	397	*	5.50984	6.09529	4.50836	1.25394	1.02869e-05	0.00058717	69.79	66.95	21.47	24.05
chr16	22311719	22312157	439	*	6.87672	6.29762	7.28881	-0.889545	1.0326e-05	0.000588904	72.11	85.21	154.01	158.73
chr3	25938523	25938876	354	*	5.24464	5.87627	4.09483	1.34356	1.03425e-05	0.000589348	65.13	52.35	14.93	19.24
chr2	149895033	149895600	568	*	5.06367	5.72438	3.80919	1.39618	1.03919e-05	0.000591484	55.83	49.91	11.2	16.83
chr6	159214413	159214879	467	*	5.66261	4.67979	6.2418	-1.24288	1.04056e-05	0.000591484	23.26	28	78.41	72.95
chr1	245242307	245242891	585	*	6.37227	5.64667	6.8528	-1.03648	1.04062e-05	0.000591484	44.2	56	121.34	109.83
chr6	31919914	31920563	650	*	6.89072	6.31388	7.30167	-0.884708	1.04239e-05	0.000591784	86.07	73.04	156.81	158.73
chr20	20349950	20350462	513	*	5.26587	5.89246	4.13325	1.34237	1.04289e-05	0.000591784	62.81	56	21.47	13.63
chr3	126679052	126679769	718	*	6.33691	5.56492	6.8371	-1.07704	1.04822e-05	0.000594127	58.16	36.52	103.61	125.06
chr1	212769143	212769620	478	*	6.25064	5.49743	6.74298	-1.06046	1.04878e-05	0.000594127	46.52	43.82	109.21	105.02
chr6	117589287	117589674	388	*	4.97396	5.6412	3.69455	1.41255	1.05163e-05	0.000595245	52.34	47.48	13.07	12.83
chr11	63512875	63513616	742	*	5.38701	4.24506	6.01635	-1.33856	1.05555e-05	0.000596962	22.1	15.83	70.94	58.52
chr12	104165192	104165617	426	*	5.83675	4.92687	6.39037	-1.19047	1.0572e-05	0.000597189	26.75	34.09	86.81	80.97
chr14	100745027	100745479	453	*	4.79785	3.25123	5.52703	-1.5159	1.05771e-05	0.000597189	9.3	9.74	51.34	40.88
chr5	170030940	170031529	590	*	6.71492	7.14329	6.10291	0.927637	1.05905e-05	0.000597447	150.04	132.69	76.54	60.93
chr21	38432554	38432917	364	*	4.68863	3.05859	5.43445	-1.54075	1.07287e-05	0.000604738	8.14	8.52	44.8	41.69
chr10	43250645	43251029	385	*	5.87409	6.40949	5.01329	1.15652	1.07629e-05	0.000606158	87.23	82.78	37.34	27.26
chr14	94255044	94255810	767	*	5.86355	6.41521	4.95907	1.18151	1.08389e-05	0.000609931	98.87	71.82	26.14	36.07
chr1	84326130	84326589	460	*	5.31174	5.93422	4.19295	1.32263	1.08611e-05	0.000610677	66.3	56	14.93	21.64
chr3	139653357	139653723	367	*	6.14581	6.64724	5.37079	1.08052	1.08842e-05	0.000611145	112.82	87.65	41.07	41.69
chr14	98604919	98605328	410	*	5.00303	5.67214	3.7164	1.41924	1.08875e-05	0.000611145	58.16	43.82	15.87	10.42
chr17	46563942	46564345	404	*	4.59621	2.8471	5.36388	-1.57201	1.09428e-05	0.000613741	4.65	9.74	38.27	44.09
chr9	100752494	100752879	386	*	4.86771	3.35216	5.59038	-1.50607	1.10275e-05	0.000617977	5.82	14.61	52.27	44.09
chr10	37177847	37178295	449	*	5.71454	6.2839	4.76034	1.21406	1.10978e-05	0.000621405	77.93	77.91	20.53	33.67
chrX	54813429	54813757	329	*	4.55756	5.29363	2.97703	1.5275	1.11306e-05	0.000622725	40.71	37.74	9.33	6.41
chr22	36234859	36235234	376	*	5.59611	4.56492	6.19132	-1.26989	1.12146e-05	0.000626906	29.08	18.26	75.6	70.55
chr11	26306289	26306848	560	*	6.59246	5.9355	7.04219	-0.966913	1.12271e-05	0.000627088	63.97	58.43	140.94	122.65
chr10	102998427	102998944	518	*	7.09149	7.47468	6.56818	0.828505	1.12608e-05	0.000628453	176.79	178.95	106.41	83.37
chr6	160254605	160255013	409	*	5.1181	3.82796	5.78812	-1.41215	1.12905e-05	0.000629588	17.45	10.96	56	54.51
chr12	105351651	105352641	991	*	7.5142	7.85763	7.0626	0.738148	1.13135e-05	0.000630353	259.38	204.51	133.48	133.88
chr19	19335668	19336306	639	*	7.78244	8.09108	7.38928	0.6608	1.13542e-05	0.000631649	287.29	258.07	166.14	169.15
chr17	72081647	72081909	263	*	4.7685	5.48875	3.26434	1.50226	1.13608e-05	0.000631649	58.16	31.65	11.2	8.02
chr16	928369	928866	498	*	5.27799	5.90325	4.14986	1.33287	1.13648e-05	0.000631649	69.79	49.91	18.67	16.83
chr12	53846376	53846786	411	*	6.43537	5.73943	6.90285	-1.00613	1.15264e-05	0.000640108	58.16	48.69	116.67	122.65
chr2	101653011	101653371	361	*	5.864	4.97853	6.40867	-1.16934	1.1539e-05	0.00064028	31.4	31.65	84.94	84.98
chr10	99299476	99300060	585	*	5.44025	4.329	6.06047	-1.31833	1.1567e-05	0.000641313	25.59	14.61	65.34	68.14
chr2	9012968	9013484	517	*	6.17721	5.39774	6.68048	-1.081	1.15882e-05	0.000641962	45.36	38.95	107.34	97.8
chr20	42018599	42019320	722	*	7.15122	7.53178	6.63283	0.819591	1.16589e-05	0.000644935	208.2	161.9	99.87	98.6
chr7	65605887	65606318	432	*	5.98065	5.10467	6.52178	-1.15856	1.1661e-05	0.000644935	38.38	30.43	103.61	80.17
chr12	13177051	13177468	418	*	5.52927	4.45267	6.13888	-1.29617	1.16925e-05	0.000646151	26.75	17.04	78.41	62.53
chr20	59426754	59427285	532	*	5.75813	6.30528	4.86597	1.17783	1.17066e-05	0.000646353	80.26	77.91	32.67	25.65
chr3	128745928	128746439	512	*	7.23789	7.60126	6.75102	0.782774	1.17199e-05	0.000646353	208.2	180.16	112.01	103.41
chr1	17020074	17020623	550	*	4.91652	5.59068	3.61014	1.42305	1.17248e-05	0.000646353	47.69	48.69	14	10.42
chr10	90711049	90711638	590	*	5.34534	4.20437	5.97439	-1.33784	1.18352e-05	0.000651449	18.61	18.26	56	69.74
chr7	30508774	30509266	493	*	5.86526	4.9428	6.42342	-1.19491	1.18365e-05	0.000651449	38.38	23.13	80.27	91.39
chr5	166457544	166457888	345	*	4.8475	5.53916	3.46992	1.44588	1.18478e-05	0.000651541	41.87	51.13	9.33	12.83
chr5	75698789	75699440	652	*	7.43336	7.77319	6.98799	0.728118	1.18896e-05	0.000653312	224.48	213.03	123.21	130.67
chr9	134553340	134553678	339	*	4.29299	2.03493	5.13371	-1.63509	1.19591e-05	0.000656594	6.98	1.22	31.74	38.48
chr8	121136427	121136868	442	*	6.5988	5.94914	7.04513	-0.959001	1.19842e-05	0.00065744	65.13	58.43	139.08	125.06
chr2	54342353	54342836	484	*	5.51924	4.46689	6.12124	-1.28637	1.20488e-05	0.000660448	17.45	26.78	66.27	72.95
chr3	115155654	115156138	485	*	5.42241	4.33869	6.03423	-1.30307	1.20828e-05	0.000661779	19.77	20.69	65.34	65.74
chr4	143761657	143762076	420	*	5.86095	4.94914	6.41527	-1.1852	1.22738e-05	0.00067129	32.57	29.22	96.14	74.55
chr11	110939816	110940301	486	*	5.40338	4.24712	6.03688	-1.34067	1.22763e-05	0.00067129	20.94	17.04	78.41	52.91
chr3	25635448	25635950	503	*	6.76843	6.16765	7.19132	-0.908485	1.22907e-05	0.000671532	75.6	68.17	151.21	141.09
chr8	9534469	9534862	394	*	5.65409	4.67214	6.23299	-1.23647	1.237e-05	0.000675023	29.08	21.91	71.87	78.56
chr6	133952540	133952920	381	*	4.78098	3.243	5.50836	-1.50384	1.23745e-05	0.000675023	11.63	7.3	42.94	48.1
chr1	15359835	15360223	389	*	5.24295	4.05389	5.8858	-1.3595	1.24406e-05	0.000678085	18.61	14.61	59.74	58.52
chr16	5540536	5541034	499	*	6.09875	6.59734	5.3306	1.07336	1.24774e-05	0.000679542	102.35	91.3	42	38.48
chr11	32456078	32456562	485	*	4.77451	5.47874	3.34296	1.46212	1.26113e-05	0.000686284	45.36	43.82	7.47	12.83
chr13	112092588	112093284	697	*	6.64538	7.07979	6.02088	0.936897	1.27046e-05	0.000690802	150.04	120.52	68.14	61.73
chr17	25936631	25937184	554	*	6.51417	5.85148	6.96656	-0.973406	1.27289e-05	0.000691571	55.83	59.65	125.07	125.06
chr2	28614826	28615601	776	*	6.90413	7.31216	6.33306	0.878288	1.27688e-05	0.000693182	180.28	137.56	80.27	80.97
chr2	161065837	161066211	375	*	4.53299	2.70767	5.31357	-1.57388	1.27978e-05	0.0006942	6.98	6.09	46.67	32.87
chr12	12857472	12857994	523	*	7.31087	6.79302	7.69114	-0.813026	1.28511e-05	0.000696532	125.62	96.17	230.55	182.78
chr11	49547737	49548291	555	*	5.71578	6.26955	4.8055	1.18507	1.28704e-05	0.000697017	84.91	69.39	27.07	28.86
chr14	104602438	104602782	345	*	5.64799	6.2157	4.69853	1.20861	1.29733e-05	0.000702029	75.6	73.04	21.47	30.46
chr2	89542799	89543072	274	*	5.0614	5.71066	3.8493	1.37455	1.30203e-05	0.000703682	51.18	53.56	16.8	12.02
chr11	27738420	27738771	352	*	5.04431	3.70168	5.72751	-1.42794	1.30246e-05	0.000703682	16.28	9.74	57.87	48.1
chr1	53935721	53936207	487	*	6.87065	7.27574	6.30539	0.869923	1.30441e-05	0.000704174	167.49	142.43	75.6	82.57
chr7	73808819	73809250	432	*	5.18032	3.95672	5.83272	-1.37731	1.31171e-05	0.000707548	12.79	18.26	57.87	56.12
chr1	48438742	48439251	510	*	5.54691	6.12941	4.55426	1.23981	1.31435e-05	0.000707855	77.93	62.08	20.53	26.45
chr14	93136457	93136884	428	*	5.33261	4.20649	5.95728	-1.32497	1.31437e-05	0.000707855	17.45	19.48	62.54	61.73
chr16	2835418	2836123	706	*	6.33905	6.81658	5.62033	1.02356	1.31698e-05	0.000708699	125.62	99.82	43.87	54.51
chr12	127969957	127970456	500	*	6.2297	5.4761	6.7222	-1.05679	1.3241e-05	0.000711965	48.85	40.17	104.54	106.62
chr22	44732026	44732343	318	*	4.49087	5.24403	2.82211	1.54218	1.33559e-05	0.000717572	45.36	30.43	9.33	4.81
chr7	158823166	158823807	642	*	6.10567	6.60517	5.33532	1.07553	1.34276e-05	0.000720855	105.84	88.86	43.87	36.88
chr2	12857552	12858058	507	*	5.99674	5.15154	6.52617	-1.13291	1.34613e-05	0.000721734	41.87	29.22	90.54	93.79
chr7	49816565	49817032	468	*	4.9627	5.62508	3.70187	1.39467	1.34689e-05	0.000721734	50.01	48.69	14	12.02
chr10	47008049	47008520	472	*	6.06527	6.57908	5.25981	1.09733	1.3476e-05	0.000721734	102.35	88.86	31.74	44.89
chr7	50663164	50663589	426	*	6.04193	5.20755	6.56718	-1.12484	1.3493e-05	0.000722072	33.73	40.17	105.47	84.17
chr16	58131034	58131547	514	*	7.54055	7.87162	7.11016	0.706864	1.35417e-05	0.000724105	240.77	227.64	128.81	147.51
chr19	18302560	18303144	585	*	5.37083	4.24506	5.9954	-1.32053	1.36635e-05	0.000729806	22.1	15.83	69.07	58.52
chr1	66901967	66902465	499	*	6.08211	5.27309	6.59735	-1.10327	1.36713e-05	0.000729806	38.38	38.95	105.47	88.18
chr11	56898385	56898954	570	*	6.16854	6.65753	5.42323	1.0524	1.36806e-05	0.000729806	108.17	93.73	45.74	40.08
chr18	56940598	56940984	387	*	6.29989	6.77158	5.59449	1.01387	1.36921e-05	0.000729844	117.48	101.04	48.54	48.1
chr1	161109522	161109981	460	*	5.99908	5.08355	6.55476	-1.18459	1.37389e-05	0.000731759	33.73	34.09	116.67	71.35
chr9	95916529	95917148	620	*	7.18809	7.55977	6.68611	0.800151	1.37549e-05	0.000732038	209.36	167.99	107.34	98.6
chr8	128981388	128981970	583	*	6.07262	5.27208	6.58445	-1.09666	1.38106e-05	0.000733932	39.55	37.74	98.94	92.99
chr1	6268753	6269092	340	*	7.08369	7.47028	6.55401	0.832949	1.38152e-05	0.000733932	200.06	154.6	98.94	88.98
chr15	84322410	84322914	505	*	4.90459	5.60155	3.50454	1.44478	1.3823e-05	0.000733932	58.16	38.95	7.47	15.23
chr22	42564870	42565534	665	*	7.15011	6.6412	7.52557	-0.804355	1.38375e-05	0.000734123	104.68	94.95	191.35	177.17
chr5	140473933	140474423	491	*	5.82532	6.3652	4.95268	1.15501	1.38856e-05	0.000736102	93.05	71.82	29.87	32.07
chr11	5705808	5706289	482	*	6.13595	5.30797	6.6587	-1.11615	1.39478e-05	0.000738818	50.01	29.22	108.27	93.79
chr6	136868521	136868825	305	*	5.88095	4.98101	6.43096	-1.17453	1.39739e-05	0.000739624	29.08	34.09	98.01	74.55
chr2	31202558	31203136	579	*	5.87949	5.00246	6.42101	-1.15671	1.40507e-05	0.000743105	34.89	29.22	89.61	81.77
chr4	108300388	108300777	390	*	4.58013	2.81967	5.34977	-1.55307	1.4066e-05	0.000743333	10.47	3.65	38.27	43.29
chr5	127972709	127973116	408	*	4.45874	2.58624	5.24692	-1.57745	1.41221e-05	0.000745718	3.49	8.52	38.27	37.68
chr17	33307828	33308440	613	*	5.49523	4.4598	6.09181	-1.26795	1.41626e-05	0.000747274	22.1	21.91	69.07	67.34
chr3	174864044	174864472	429	*	5.03756	3.70468	5.71836	-1.42001	1.42473e-05	0.000751154	15.12	10.96	58.8	46.5
chr7	130380618	130381065	448	*	6.31849	5.58824	6.80103	-1.03326	1.42814e-05	0.000752367	51.18	45.04	120.41	102.61
chr1	6516186	6516469	284	*	4.80033	5.4957	3.40707	1.45283	1.43258e-05	0.000754119	48.85	41.39	14	7.21
chr19	29776770	29777175	406	*	5.0404	5.69304	3.81595	1.36953	1.43495e-05	0.000754782	52.34	51.13	12.13	16.03
chr3	93834307	93834767	461	*	5.42297	4.33676	6.03556	-1.29693	1.43899e-05	0.000756319	20.94	19.48	71.87	59.32
chr20	20574040	20575115	1076	*	7.22423	6.72216	7.59596	-0.795509	1.45118e-05	0.000762134	118.64	92.52	196.95	189.99
chr8	144214748	144215040	293	*	4.18269	4.98101	2.24442	1.58375	1.45604e-05	0.000764095	29.08	34.09	4.67	4.81
chr5	180596830	180597230	401	*	4.86767	5.5641	3.46992	1.44462	1.46338e-05	0.000767199	59.32	35.3	9.33	12.83
chr11	108741866	108742337	472	*	5.82587	4.88586	6.39027	-1.19976	1.46517e-05	0.000767199	37.22	21.91	92.41	75.36
chr20	56522575	56523220	646	*	4.90532	3.50434	5.6025	-1.44957	1.46536e-05	0.000767199	9.3	13.39	46.67	50.5
chr1	175403288	175403795	508	*	5.78395	6.32488	4.90853	1.15455	1.46997e-05	0.000769019	86.07	74.26	28	32.07
chr6	41743621	41744045	425	*	6.78084	6.17873	7.20437	-0.906834	1.47652e-05	0.000771849	77.93	66.95	158.68	136.28
chr14	65486627	65487138	512	*	6.57653	5.92172	7.02526	-0.960988	1.48701e-05	0.000776461	62.81	58.43	141.88	118.65
chr11	1474751	1475222	472	*	6.61094	7.0533	5.96972	0.948655	1.48764e-05	0.000776461	151.21	114.43	58.8	66.54
chr5	8842981	8843557	577	*	6.28238	5.55127	6.76529	-1.03429	1.49141e-05	0.000777832	51.18	42.61	110.14	107.42
chr19	1590672	1591472	801	*	5.81229	4.89903	6.36714	-1.18349	1.52115e-05	0.000792729	25.59	34.09	90.54	74.55
chr17	49565058	49565626	569	*	4.87306	5.55043	3.55392	1.41603	1.52611e-05	0.000794705	52.34	41.39	13.07	10.42
chr9	137703197	137703753	557	*	5.23988	4.06327	5.87922	-1.34703	1.52794e-05	0.000794922	13.96	19.48	61.6	56.12
chr8	50947355	50947820	466	*	5.67238	4.70318	6.24692	-1.22059	1.52888e-05	0.000794922	31.4	20.69	76.54	75.36
chrX	77285153	77285517	365	*	4.82621	3.3251	5.54581	-1.47778	1.53874e-05	0.000799435	13.96	6.09	48.54	44.89
chr17	16593131	16593634	504	*	6.03404	6.54145	5.24442	1.0864	1.54689e-05	0.000803052	103.52	82.78	37.34	38.48
chr5	150180601	150181510	910	*	7.08203	6.5606	7.46423	-0.818266	1.54959e-05	0.000803842	102.35	86.43	179.21	173.96
chr2	233285220	233285716	497	*	4.42308	5.17927	2.73793	1.53672	1.55087e-05	0.000803885	38.38	34.09	9.33	4.01
chr11	70261007	70261676	670	*	7.15013	6.62961	7.53183	-0.816111	1.55756e-05	0.00080674	112.82	85.21	191.35	178.77
chr12	132918662	132919206	545	*	5.59011	6.15483	4.64918	1.20409	1.57256e-05	0.000813883	76.77	65.74	26.14	24.05
chr3	123166696	123167253	558	*	7.95862	8.24918	7.59441	0.622351	1.57614e-05	0.000814526	316.37	292.16	205.35	181.18
chr1	52402257	52402577	321	*	4.80778	3.33676	5.52083	-1.46841	1.57621e-05	0.000814526	10.47	9.74	48.54	43.29
chr7	89927412	89927866	455	*	6.40537	5.70618	6.8743	-1.00294	1.58081e-05	0.000816263	58.16	46.26	123.21	111.43
chr5	1667377	1667692	316	*	6.14485	6.63238	5.40297	1.04516	1.58198e-05	0.000816263	104.68	93.73	42.94	41.69
chr17	4755764	4756136	373	*	4.49662	2.70168	5.27215	-1.55236	1.58324e-05	0.000816292	8.14	4.87	36.4	40.88
chr6	160509318	160509905	588	*	6.97892	6.44151	7.36959	-0.837896	1.58813e-05	0.000818189	83.74	90.08	168.01	162.74
chr4	42400215	42400715	501	*	4.96019	5.62191	3.70187	1.38658	1.59054e-05	0.000818805	54.67	43.82	14	12.02
chr8	30140244	30140736	493	*	5.37969	4.29264	5.99254	-1.29507	1.60457e-05	0.000825401	20.94	18.26	61.6	65.74
chr22	28398386	28398807	422	*	4.55724	2.83071	5.32092	-1.53685	1.60685e-05	0.000825906	8.14	6.09	43.87	36.07
chr2	171943179	171943769	591	*	6.67623	6.04001	7.11622	-0.940524	1.60799e-05	0.000825906	75.6	56	148.41	129.07
chr20	58220798	58221235	438	*	5.34269	5.94978	4.27419	1.29092	1.61248e-05	0.000827586	63.97	59.65	24.27	14.43
chr22	43263541	43264124	584	*	7.24482	7.60166	6.76965	0.766754	1.62116e-05	0.000831408	205.87	182.6	114.81	103.41
chrX	150994290	150994670	381	*	4.55486	2.84166	5.31616	-1.53472	1.62694e-05	0.000833199	5.82	8.52	42	37.68
chr2	75517862	75518228	367	*	5.83411	4.95167	6.37766	-1.15842	1.62816e-05	0.000833199	30.24	31.65	87.74	78.56
chr20	35382954	35383488	535	*	6.41472	5.72364	6.88002	-0.995151	1.6295e-05	0.000833199	56.99	48.69	124.14	111.43
chr10	94825790	94826119	330	*	5.63386	6.19401	4.70583	1.18913	1.62994e-05	0.000833199	70.95	75.47	23.33	28.86
chr17	16900848	16901187	340	*	5.11157	5.76548	3.88244	1.37226	1.6308e-05	0.000833199	68.62	40.17	15.87	13.63
chr3	147663766	147664273	508	*	6.65459	6.03319	7.08751	-0.927604	1.63302e-05	0.000833702	62.81	68.17	143.74	128.27
chr15	75871464	75872073	610	*	7.08189	6.56018	7.46423	-0.817969	1.6418e-05	0.000837555	103.52	85.21	179.21	173.96
chr19	50740803	50741129	327	*	4.37169	5.14823	2.57069	1.54909	1.65085e-05	0.000841537	45.36	25.56	4.67	7.21
chr14	72490640	72491150	511	*	5.51507	6.09243	4.53765	1.22558	1.65526e-05	0.000842915	75.6	60.87	22.4	24.05
chr10	64008249	64008642	394	*	4.85726	3.41384	5.56417	-1.45495	1.65605e-05	0.000842915	12.79	8.52	51.34	43.29
chr2	171678675	171679173	499	*	6.04259	6.55853	5.23183	1.09934	1.66797e-05	0.000848347	108.17	80.34	32.67	42.49
chr18	7174703	7175030	328	*	4.87764	5.56822	3.50454	1.42439	1.67062e-05	0.000848579	53.5	41.39	7.47	15.23
chr7	37274467	37274835	369	*	5.15885	5.79952	3.97754	1.34177	1.67094e-05	0.000848579	65.13	46.26	13.07	18.44
chr12	19660756	19661128	373	*	4.6094	2.95923	5.35906	-1.51826	1.67937e-05	0.00085142	5.82	9.74	42	40.08
chr7	47325768	47326207	440	*	5.65989	4.70618	6.22908	-1.20847	1.68002e-05	0.00085142	29.08	23.13	74.67	75.36
chr13	76140864	76141273	410	*	5.1913	3.95923	5.846	-1.37034	1.6803e-05	0.00085142	11.63	19.48	65.34	49.7
chr6	41341597	41341832	236	*	4.59978	5.31781	3.10591	1.47226	1.68388e-05	0.000852593	38.38	41.39	8.4	8.82
chr17	65154222	65154580	359	*	4.37308	2.4175	5.17397	-1.5735	1.68663e-05	0.000853348	5.82	4.87	40.14	32.07
chr4	100729431	100729808	378	*	6.01455	6.51716	5.23666	1.0766	1.69044e-05	0.000854323	91.89	91.3	40.14	35.27
chr10	90488102	90488664	563	*	6.44022	6.8941	5.77429	0.968784	1.69108e-05	0.000854323	119.8	118.08	48.54	60.93
chr7	129677559	129677981	423	*	5.24358	4.05153	5.88727	-1.34701	1.6976e-05	0.000856976	19.77	13.39	66.27	52.11
chr16	19126036	19126848	813	*	7.67488	7.98978	7.27149	0.67226	1.70612e-05	0.000860637	271.01	237.38	150.28	158.73
chr7	151267396	151267863	468	*	5.60084	4.59994	6.1861	-1.23833	1.70939e-05	0.000861644	30.24	18.26	71.87	73.75
chr9	133723293	133723713	421	*	5.28186	4.09898	5.92297	-1.34384	1.71383e-05	0.000862979	22.1	12.17	53.2	68.14
chr10	128590650	128591017	368	*	5.16793	3.89903	5.83244	-1.38495	1.71459e-05	0.000862979	12.79	17.04	69.07	44.89
chr11	8339972	8340454	483	*	5.41748	6.00429	4.41192	1.24607	1.72216e-05	0.000865612	66.3	62.08	23.33	19.24
chr19	46417080	46417485	406	*	5.39286	5.9988	4.32804	1.28474	1.72238e-05	0.000865612	76.77	51.13	23.33	16.83
chr12	49374459	49375107	649	*	6.44516	6.89739	5.7828	0.97019	1.72957e-05	0.000867816	108.17	130.25	58.8	51.31
chr9	138563450	138563910	461	*	4.64434	5.35546	3.18207	1.46172	1.72996e-05	0.000867816	45.36	36.52	9.33	8.82
chr14	65881750	65882060	311	*	5.51332	4.412	6.13054	-1.29652	1.73061e-05	0.000867816	26.75	15.83	84.01	56.12
chr14	51560539	51561106	568	*	5.35126	5.94851	4.31377	1.26431	1.73472e-05	0.000869235	66.3	57.21	20.53	19.24
chr19	8400282	8400827	546	*	6.23777	6.70992	5.53132	1.0115	1.7404e-05	0.000871436	104.68	104.69	47.6	44.89
chr18	34874917	34875393	477	*	6.2351	6.7088	5.52514	1.01307	1.74742e-05	0.000874302	108.17	101.04	44.8	47.3
chr15	26505577	26506117	541	*	6.6059	7.03571	5.99092	0.92296	1.74906e-05	0.000874479	141.9	120.52	66.27	60.93
chrX	16689176	16689505	330	*	4.23379	2.04444	5.06627	-1.59257	1.76373e-05	0.000881165	5.82	2.43	31.74	35.27
chr5	105790416	105790801	386	*	5.28752	5.89312	4.22379	1.28092	1.77677e-05	0.00088702	61.65	57.21	20.53	16.83
chr7	150864321	150864835	515	*	6.58478	7.02136	5.95575	0.93575	1.78001e-05	0.000887983	145.39	114.43	61.6	62.53
chr5	158476784	158477216	433	*	5.51694	4.49223	6.11005	-1.25227	1.78654e-05	0.000890587	26.75	18.26	70	68.14
chr2	75833303	75833643	341	*	5.1887	4.00734	5.82938	-1.34297	1.79051e-05	0.000891907	15.12	17.04	56	57.72
chr3	152552944	152553601	658	*	5.95149	6.46709	5.14158	1.10471	1.79659e-05	0.000894278	95.38	81.56	40.14	30.46
chr7	34636490	34636957	468	*	5.47176	6.05447	4.47847	1.23222	1.80756e-05	0.00089908	73.28	59.65	20.53	24.05
chr12	129283082	129283699	618	*	5.31801	4.20012	5.94022	-1.30762	1.82419e-05	0.000906684	20.94	15.83	57.87	64.93
chr6	112407805	112408197	393	*	4.74319	3.14713	5.48236	-1.4948	1.83136e-05	0.000909462	11.63	6.09	54.14	35.27
chr18	39518483	39518906	424	*	5.0499	3.77907	5.7149	-1.38505	1.8334e-05	0.000909462	11.63	15.83	51.34	53.71
chr1	150457347	150457753	407	*	4.90546	3.50434	5.60267	-1.43863	1.83381e-05	0.000909462	9.3	13.39	41.07	56.12
chr18	39632128	39632473	346	*	5.67773	4.66907	6.26557	-1.23903	1.83555e-05	0.000909657	31.4	19.48	90.54	63.33
chr2	37570500	37571043	544	*	5.35293	4.243	5.97275	-1.3019	1.83717e-05	0.000909797	23.26	14.61	60.67	64.93
chr10	13655512	13655856	345	*	4.60831	2.93898	5.36157	-1.5144	1.83857e-05	0.000909824	10.47	4.87	37.34	44.89
chr14	77679427	77680147	721	*	7.01541	7.39843	6.49244	0.817777	1.85667e-05	0.000918111	177.96	159.47	83.07	97
chr17	36762422	36763061	640	*	8.1785	8.45918	7.82969	0.600485	1.86184e-05	0.000919994	386.16	317.72	241.75	213.24
chr12	64575450	64575903	454	*	5.76467	4.86393	6.31497	-1.16817	1.87011e-05	0.000922942	30.24	28	83.07	76.16
chr2	110340909	110341316	408	*	5.19111	4.00002	5.83453	-1.34481	1.87053e-05	0.000922942	18.61	13.39	53.2	60.93
chr2	175214740	175215197	458	*	5.15698	3.9542	5.80366	-1.35118	1.87816e-05	0.000926028	13.96	17.04	58.8	52.91
chr15	77265415	77266077	663	*	6.72204	7.14218	6.12681	0.897592	1.88581e-05	0.000929128	154.69	127.82	64.4	75.36
chr15	86775199	86775834	636	*	5.38423	5.97667	4.36157	1.24892	1.88996e-05	0.00093049	66.3	59.65	18.67	22.45
chr7	44831072	44831577	506	*	4.99662	3.63256	5.68503	-1.41751	1.89145e-05	0.000930552	16.28	8.52	58.8	44.09
chr5	135265639	135266059	421	*	4.85211	5.53242	3.52119	1.40408	1.89539e-05	0.00093181	51.18	41.39	9.33	13.63
chr16	1123853	1124320	468	*	5.69328	6.24018	4.80181	1.16585	1.90618e-05	0.000936249	73.28	77.91	31.74	24.05
chr19	56151345	56151885	541	*	7.49215	7.81936	7.06828	0.701058	1.90718e-05	0.000936249	232.62	219.12	140.94	127.46
chr11	124609726	124610799	1074	*	7.02119	7.40742	6.49217	0.831037	1.91613e-05	0.000939957	184.94	154.6	99.87	80.17
chr6	152677797	152678173	377	*	4.77073	3.23471	5.4977	-1.47537	1.92112e-05	0.000941723	13.96	4.87	43.87	46.5
chr4	81243842	81244283	442	*	5.28018	4.15812	5.90364	-1.30881	1.92446e-05	0.000942678	17.45	18.26	58.8	60.93
chr1	48251211	48251574	364	*	4.83449	5.52734	3.45192	1.43109	1.92768e-05	0.000943572	58.16	34.09	13.07	8.82
chr6	163277799	163278256	458	*	6.03618	5.22276	6.55317	-1.10109	1.93063e-05	0.000944334	43.04	31.65	86.81	101.01
chr12	71786225	71786726	502	*	6.42734	5.7229	6.8986	-1.00363	1.93612e-05	0.000946335	58.16	47.48	134.41	104.22
chr13	25320538	25321146	609	*	6.01248	6.5246	5.21124	1.08674	1.9414e-05	0.000947777	97.7	86.43	30.8	43.29
chr13	25201164	25201699	536	*	7.28117	7.63924	6.8038	0.765104	1.94187e-05	0.000947777	220.99	177.73	106.41	117.04
chr5	140593301	140593653	353	*	4.97408	5.62588	3.75271	1.36084	1.94525e-05	0.000948745	48.85	49.91	14.93	12.02
chr3	12750384	12750746	363	*	5.23191	4.06093	5.86964	-1.33573	1.95585e-05	0.000953226	15.12	18.26	50.4	66.54
chr11	76784100	76784829	730	*	6.601	5.97729	7.03502	-0.928923	1.96041e-05	0.000954762	65.13	60.87	126.01	136.28
chr15	27111956	27112428	473	*	5.80734	6.35451	4.91511	1.15712	1.96911e-05	0.00095831	93.05	70.6	24.27	36.07
chr21	45358882	45359480	599	*	7.39224	7.73229	6.94647	0.725542	1.97462e-05	0.000960302	225.65	199.64	117.61	129.07
chr3	195501770	195502231	462	*	6.82965	7.23202	6.26969	0.858486	1.99913e-05	0.000971019	157.02	143.64	70.94	83.37
chr3	107293476	107293924	449	*	5.57886	4.60798	6.15398	-1.21602	1.99953e-05	0.000971019	24.43	24.35	71.87	70.55
chr5	58303256	58303646	391	*	4.97661	3.63885	5.65862	-1.4056	2.0023e-05	0.00097151	13.96	10.96	56.94	44.09
chr8	142062947	142063311	365	*	4.48358	2.70168	5.2569	-1.53134	2.00341e-05	0.00097151	8.14	4.87	42	34.47
chr6	161100189	161100783	595	*	4.88999	5.5674	3.57069	1.3961	2.00976e-05	0.000973892	54.67	40.17	9.33	14.43
chr16	71460594	71461186	593	*	4.40776	5.1717	2.6798	1.52087	2.0132e-05	0.000974859	46.52	25.56	5.6	7.21
chr5	56134281	56134706	426	*	5.09373	3.8252	5.75813	-1.37548	2.01729e-05	0.000976141	18.61	9.74	56.94	51.31
chr4	171295888	171296325	438	*	5.40636	6.01037	4.34764	1.26463	2.02033e-05	0.000976611	54.67	74.26	15.87	24.85
chr1	247070819	247071188	370	*	4.97145	3.63571	5.65296	-1.40411	2.02114e-05	0.000976611	15.12	9.74	54.14	46.5
chr7	100609341	100609906	566	*	8.36554	8.61973	8.05678	0.540937	2.0239e-05	0.000977246	410.58	376.15	274.42	258.13
chr7	92077521	92077921	401	*	5.6333	4.68131	6.2019	-1.20478	2.02973e-05	0.000977569	22.1	29.22	71.87	75.36
chr11	72929178	72929886	709	*	7.31331	7.67606	6.82757	0.77896	2.03078e-05	0.000977569	234.95	174.08	121.34	105.82
chrX	64923749	64924104	356	*	4.47913	2.71365	5.24964	-1.52955	2.03087e-05	0.000977569	5.82	7.3	33.6	42.49
chr4	180788449	180788856	408	*	5.35792	5.95104	4.33316	1.24811	2.03124e-05	0.000977569	61.65	62.08	18.67	21.64
chr6	107563031	107563405	375	*	4.28035	2.25123	5.09181	-1.56631	2.03179e-05	0.000977569	4.65	4.87	34.54	33.67
chr19	11570892	11571465	574	*	5.98083	6.50152	5.15809	1.10799	2.03629e-05	0.000978623	108.17	73.04	34.54	36.88
chr17	46114252	46114763	512	*	7.36043	7.70786	6.90185	0.746738	2.03687e-05	0.000978623	222.16	195.99	132.54	106.62
chr9	135732952	135733320	369	*	4.62758	5.33966	3.16098	1.44974	2.04011e-05	0.000979484	38.38	42.61	7.47	10.42
chr5	141193600	141194016	417	*	6.82696	7.22669	6.27215	0.853251	2.04644e-05	0.000981608	154.69	144.86	72.8	81.77
chr7	141437645	141438545	901	*	7.63995	7.23124	7.95808	-0.678128	2.04846e-05	0.000981608	160.51	139.99	246.42	250.92
chr15	50168988	50169634	647	*	5.44937	6.029	4.46526	1.22614	2.04964e-05	0.000981608	70.95	59.65	23.33	20.84
chr17	46547941	46548367	427	*	4.66477	3.06327	5.40502	-1.49137	2.05033e-05	0.000981608	6.98	9.74	49.47	35.27
chr4	165304633	165305218	586	*	4.70011	5.412	3.23436	1.45069	2.06467e-05	0.000987162	53.5	31.65	8.4	10.42
chr8	31497426	31498097	672	*	6.5628	7.00155	5.92922	0.936582	2.0654e-05	0.000987162	143.06	113.21	56.94	64.93
chr17	48929370	48929879	510	*	6.18608	5.4433	6.67399	-1.04173	2.06766e-05	0.000987162	39.55	47.48	100.81	103.41
chr20	21501804	21502401	598	*	4.45868	5.21857	2.75331	1.51194	2.06853e-05	0.000987162	47.69	26.78	4.67	8.82
chr8	144822287	144823066	780	*	7.40388	7.74034	6.96427	0.718408	2.06923e-05	0.000987162	226.81	200.86	122.27	127.46
chr12	52565776	52566325	550	*	6.39751	6.85401	5.72587	0.974992	2.07189e-05	0.000987738	129.11	102.26	51.34	54.51
chr7	17691475	17691846	372	*	5.04165	3.76763	5.70749	-1.37765	2.07827e-05	0.000990079	16.28	10.96	53.2	51.31
chr11	62107595	62108139	545	*	6.47437	5.79952	6.93233	-0.97691	2.08438e-05	0.000992292	65.13	46.26	117.61	126.66
chr17	37395821	37396200	380	*	6.78379	7.19081	6.21475	0.874059	2.08594e-05	0.00099234	155.86	136.34	81.21	67.34
chr5	73331323	73331746	424	*	5.07573	3.83345	5.73319	-1.36513	2.09127e-05	0.000994177	15.12	13.39	49.47	56.92
chr2	240821511	240822155	645	*	5.94266	6.46443	5.11714	1.10784	2.09677e-05	0.00099609	102.35	74.26	31.74	37.68
chr2	224662852	224663272	421	*	5.05121	3.77907	5.71656	-1.37802	2.1032e-05	0.000998447	11.63	15.83	57.87	47.3
chr12	99047679	99048090	412	*	5.46216	4.36637	6.07769	-1.2876	2.10734e-05	0.000999709	29.08	12.17	65.34	69.74
chr1	28286422	28286964	543	*	7.05893	7.43273	6.55308	0.797907	2.11029e-05	0.00100041	160.51	185.03	92.41	95.4
chr17	79783702	79784117	416	*	5.3969	5.98747	4.37994	1.24674	2.11196e-05	0.0010005	72.11	54.78	22.4	19.24
chr16	8999097	9000045	949	*	6.10996	5.33482	6.61144	-1.06823	2.11447e-05	0.00100099	44.2	36.52	90.54	105.02
chr16	67499636	67500158	523	*	7.21229	6.73486	7.5704	-0.765671	2.12395e-05	0.00100462	104.68	108.34	188.55	191.6
chr6	27652104	27652433	330	*	4.22538	5.01219	2.36157	1.54052	2.12511e-05	0.00100462	25.59	38.95	4.67	5.61
chr11	73642267	73642747	481	*	5.56016	4.54587	6.14986	-1.24401	2.13992e-05	0.00101091	16.28	30.43	74.67	67.34
chr19	5567448	5568006	559	*	6.55655	6.99468	5.92426	0.939384	2.14288e-05	0.00101141	143.06	111.99	65.34	56.12
chr6	73334308	73334684	377	*	6.39903	5.72586	6.85623	-0.976305	2.14396e-05	0.00101141	53.5	52.35	113.87	117.84
chr3	62354553	62355058	506	*	5.80585	6.33482	4.96186	1.1253	2.15227e-05	0.00101463	88.4	73.04	32.67	29.66
chr1	31807865	31808284	420	*	5.47029	4.41016	6.07475	-1.26632	2.15948e-05	0.00101732	27.91	14.61	69.07	65.74
chr3	69841141	69841706	566	*	5.69101	4.77479	6.24692	-1.17643	2.18362e-05	0.00102797	26.75	28	76.54	75.36
chr2	150954501	150954891	391	*	4.88107	3.50434	5.57252	-1.41965	2.18831e-05	0.00102946	9.3	13.39	43.87	51.31
chr3	21881113	21881574	462	*	5.47266	4.4598	6.06189	-1.24036	2.19346e-05	0.00103114	22.1	21.91	66.27	67.34
chr4	76415344	76415799	456	*	4.52629	2.83071	5.2844	-1.50792	2.19492e-05	0.00103114	8.14	6.09	41.07	36.88
chr19	15590225	15590872	648	*	5.53226	6.09586	4.59449	1.1913	2.19735e-05	0.00103157	68.62	68.17	24.27	24.05
chr1	25475046	25475572	527	*	5.64648	6.22927	4.65296	1.23104	2.20488e-05	0.00103438	97.7	52.35	27.07	23.25
chr9	16257542	16258068	527	*	6.1349	5.3777	6.62891	-1.05065	2.20671e-05	0.00103453	44.2	38.95	101.74	96.2
chr13	52305933	52306352	420	*	4.93295	3.56657	5.62193	-1.411	2.21711e-05	0.00103868	13.96	9.74	56	42.49
chr17	40995321	40995825	505	*	6.91842	6.38005	7.30958	-0.836168	2.22088e-05	0.00103973	82.58	84	157.74	159.53
chr12	56727771	56728396	626	*	6.48688	5.83756	6.93304	-0.952891	2.2244e-05	0.00104066	53.5	60.87	124.14	120.25
chr17	6605049	6605577	529	*	6.36726	6.82005	5.7037	0.969385	2.23343e-05	0.00104416	113.99	111.99	56.94	47.3
chr6	113505425	113505964	540	*	4.92451	3.56327	5.61225	-1.4085	2.24315e-05	0.00104727	15.12	8.52	51.34	46.5
chr18	10230064	10230473	410	*	5.50022	4.49743	6.08611	-1.23237	2.24319e-05	0.00104727	23.26	21.91	70.94	64.93
chr9	126895934	126896356	423	*	5.36601	4.29861	5.97275	-1.27355	2.24847e-05	0.00104902	17.45	21.91	60.67	64.93
chr2	23840251	23840795	545	*	6.67875	6.08355	7.09888	-0.897564	2.26335e-05	0.00105497	67.46	68.17	136.28	137.89
chr15	67793550	67793919	370	*	4.73692	3.25533	5.45229	-1.45264	2.26436e-05	0.00105497	8.14	10.96	41.07	46.5
chr16	89665746	89666398	653	*	6.56032	6.98963	5.9464	0.91723	2.27282e-05	0.00105819	136.08	118.08	61.6	61.73
chr4	156129474	156130112	639	*	4.95608	5.60878	3.7314	1.3509	2.27925e-05	0.00106023	47.69	49.91	12.13	14.43
chr19	4207214	4207496	283	*	4.95749	3.64198	5.63395	-1.39281	2.28034e-05	0.00106023	12.79	12.17	44.8	54.51
chr22	26530708	26531359	652	*	5.67997	6.23343	4.77052	1.17292	2.28596e-05	0.00106212	88.4	62.08	28.94	25.65
chr16	1203682	1204203	522	*	4.62475	5.33386	3.17156	1.4409	2.28869e-05	0.00106266	45.36	35.3	8.4	9.62
chr1	192549574	192549914	341	*	4.84088	3.4248	5.54156	-1.42913	2.29314e-05	0.00106399	9.3	12.17	52.27	40.88
chr20	62073429	62073990	562	*	6.55752	6.98702	5.94318	0.918625	2.30003e-05	0.00106646	119.8	133.91	65.34	57.72
chr8	61835409	61835809	401	*	4.55403	5.27208	3.0601	1.45802	2.30301e-05	0.00106711	39.55	37.74	10.27	6.41
chrX	25041082	25041457	376	*	5.0729	5.70693	3.91484	1.32029	2.31046e-05	0.00106983	56.99	47.48	14.93	15.23
chr2	26394356	26394771	416	*	6.33684	6.79619	5.65894	0.976648	2.31447e-05	0.00107083	115.15	107.12	45.74	55.31
chr21	46131269	46131738	470	*	4.32067	5.08008	2.6179	1.50922	2.3158e-05	0.00107083	37.22	30.43	7.47	4.81
chr14	25286938	25287402	465	*	5.62314	4.67979	6.18871	-1.19411	2.32462e-05	0.00107418	23.26	28	73.74	72.15
chr8	144313564	144314062	499	*	6.115	6.59855	5.38242	1.02834	2.32712e-05	0.0010746	98.87	94.95	40.14	43.29
chr14	95147534	95148074	541	*	6.10738	6.59068	5.37537	1.02988	2.33441e-05	0.00107723	95.38	97.39	42.94	40.08
chr18	31075272	31075618	347	*	4.73347	5.41933	3.37994	1.40721	2.34017e-05	0.00107916	44.2	41.39	11.2	9.62
chr19	42683344	42683796	453	*	6.55017	6.9776	5.94009	0.913744	2.34239e-05	0.00107945	129.11	122.95	63.47	59.32
chr12	6977899	6978192	294	*	5.34652	4.24093	5.96504	-1.28972	2.34522e-05	0.00108001	24.43	13.39	61.6	63.33
chr12	22253911	22254356	446	*	5.55435	6.11738	4.61823	1.18843	2.34693e-05	0.00108007	76.77	62.08	24.27	24.85
chr14	75985059	75985452	394	*	5.72423	6.29585	4.76354	1.20594	2.34972e-05	0.00108062	102.35	54.78	27.07	27.26
chr5	148644246	148644676	431	*	6.09744	6.58743	5.34977	1.04101	2.36698e-05	0.00108757	104.68	87.65	38.27	43.29
chr7	150663132	150663427	296	*	4.994	5.63963	3.79498	1.34135	2.36805e-05	0.00108757	54.67	45.04	14.93	12.83
chr12	118472571	118473389	819	*	6.03978	5.2259	6.55695	-1.09457	2.37427e-05	0.00108968	39.55	35.3	107.34	80.97
chr1	178251980	178252390	411	*	5.3904	4.33289	5.99403	-1.26317	2.38654e-05	0.00109457	23.26	17.04	62.54	64.93
chr16	1080421	1080822	402	*	5.11779	5.74309	3.98956	1.30168	2.39734e-05	0.00109878	52.34	54.78	14.93	16.83
chr1	110192181	110192641	461	*	6.11028	5.28564	6.63171	-1.10129	2.4118e-05	0.00110466	50.01	28	110.14	88.18
chr19	3440005	3440540	536	*	6.29054	6.75271	5.60641	0.984022	2.41395e-05	0.0011049	100.03	115.65	48.54	48.9
chr7	158118796	158119158	363	*	4.35201	5.10581	2.6798	1.49533	2.41635e-05	0.00110525	37.22	31.65	5.6	7.21
chr4	2956528	2956958	431	*	6.07595	6.56905	5.32092	1.05193	2.41933e-05	0.00110587	104.68	85.21	43.87	36.07
chr1	46877528	46878059	532	*	6.37107	6.8247	5.70567	0.967579	2.43144e-05	0.00111065	124.45	102.26	52.27	52.11
chr4	78783260	78783911	652	*	5.31376	4.14492	5.95089	-1.31915	2.43854e-05	0.00111287	24.43	10.96	70	53.71
chr18	48171220	48171610	391	*	5.17261	5.78792	4.07757	1.28623	2.43959e-05	0.00111287	58.16	52.35	17.73	16.03
chr12	53937211	53937649	439	*	6.60644	5.94534	7.05808	-0.958542	2.44301e-05	0.00111368	72.11	51.13	150.28	116.24
chr10	6828399	6829081	683	*	6.67165	6.07344	7.09326	-0.90095	2.44752e-05	0.00111499	61.65	73.04	134.41	138.69
chr17	36972037	36972539	503	*	5.45366	4.41384	6.05165	-1.25021	2.45953e-05	0.0011197	25.59	17.04	70.94	61.73
chr8	144250813	144251285	473	*	4.49296	5.2259	2.92792	1.46578	2.47317e-05	0.00112443	39.55	35.3	5.6	9.62
chr2	86305952	86306237	286	*	4.7756	3.34063	5.4806	-1.4322	2.47324e-05	0.00112443	9.3	10.96	42	47.3
chr16	29327431	29327959	529	*	5.01414	5.66907	3.78122	1.35268	2.47859e-05	0.001125	62.81	38.95	13.07	14.43
chr7	151842994	151843607	614	*	6.46714	5.80792	6.91792	-0.960293	2.47877e-05	0.001125	51.18	60.87	128.81	113.03
chr22	23226096	23226557	462	*	6.81581	7.21439	6.2632	0.85394	2.47947e-05	0.001125	157.02	139.99	83.07	70.55
chr11	119155218	119155700	483	*	5.67984	4.71811	6.25181	-1.20428	2.48618e-05	0.00112719	19.77	32.87	85.87	66.54
chr1	26612286	26612699	414	*	6.46017	6.90488	5.81397	0.950181	2.48763e-05	0.00112719	133.76	105.91	58.8	53.71
chr20	29848087	29848621	535	*	5.41688	6.0242	4.34764	1.26531	2.49698e-05	0.00113067	80.26	49.91	15.87	24.85
chr8	130903861	130904263	403	*	5.52551	4.44551	6.13618	-1.271	2.50441e-05	0.00113328	31.4	12.17	76.54	64.13
chr11	78871822	78872234	413	*	6.02335	5.23216	6.53141	-1.07982	2.51135e-05	0.00113566	32.57	42.61	89.61	95.4
chr17	9425407	9425769	363	*	5.04008	3.76763	5.70552	-1.36687	2.52531e-05	0.00114121	16.28	10.96	57.87	46.5
chr3	55583171	55583654	484	*	5.54855	4.57316	6.12522	-1.21123	2.53463e-05	0.00114466	23.26	24.35	74.67	64.93
chr7	18733030	18733405	376	*	6.07449	5.29363	6.57833	-1.06702	2.54843e-05	0.00115012	40.71	37.74	104.54	86.58
chr18	9684000	9684382	383	*	5.5467	4.56987	6.12385	-1.21116	2.55356e-05	0.00115167	25.59	21.91	73.74	65.74
chr7	90712109	90712600	492	*	5.88198	5.00002	6.42535	-1.14384	2.56304e-05	0.00115518	37.22	26.78	98.94	72.95
chr7	116442866	116443291	426	*	5.93757	5.07429	6.47393	-1.13006	2.56702e-05	0.0011562	43.04	24.35	95.21	82.57
chr3	150804367	150805072	706	*	6.66079	6.0242	7.10096	-0.935024	2.60196e-05	0.00117116	80.26	49.91	139.08	135.48
chr6	114417673	114418205	533	*	6.69581	6.09586	7.11828	-0.898753	2.60952e-05	0.00117378	68.62	68.17	151.21	126.66
chr1	94987841	94988218	378	*	5.31103	4.20225	5.93051	-1.28729	2.62086e-05	0.0011781	19.77	17.04	69.07	52.91
chr9	37390692	37391120	429	*	5.39067	5.97605	4.38943	1.22475	2.62296e-05	0.00117826	67.46	58.43	18.67	23.25
chr16	86286228	86286721	494	*	7.02667	7.40673	6.50923	0.814135	2.62772e-05	0.00117962	188.43	150.95	98.01	84.17
chr9	79906444	79907102	659	*	6.15741	5.42116	6.64254	-1.03103	2.63494e-05	0.00118208	41.87	43.82	98.01	101.81
chr1	246810382	246810817	436	*	6.08233	5.31781	6.57941	-1.05428	2.64074e-05	0.00118389	38.38	41.39	99.87	91.39
chr13	22212244	22212896	653	*	6.34019	5.65869	6.80118	-0.980691	2.66292e-05	0.00119305	52.34	48.69	109.21	113.84
chr8	23563889	23564443	555	*	5.05599	5.69077	3.89527	1.32014	2.67552e-05	0.0011979	55.83	47.48	17.73	12.02
chr6	1479472	1479874	403	*	5.21121	4.05624	5.84434	-1.31067	2.68399e-05	0.00120005	17.45	15.83	64.4	50.5
chr11	14926959	14927300	342	*	6.68056	7.08972	6.10729	0.871848	2.68554e-05	0.00120005	136.08	136.34	68.14	69.74
chr10	38043683	38043985	303	*	4.43869	5.17927	2.83548	1.4796	2.68566e-05	0.00120005	38.38	34.09	10.27	4.01
chr5	77268386	77268926	541	*	6.16982	6.65559	5.43206	1.03652	2.68777e-05	0.00120021	113.99	87.65	49.47	36.88
chr14	106626845	106627379	535	*	5.21425	5.82005	4.14986	1.26528	2.69362e-05	0.00120203	56.99	56	18.67	16.83
chr17	8868928	8869378	451	*	4.62317	5.33192	3.17156	1.4306	2.70716e-05	0.00120727	47.69	32.87	8.4	9.62
chr7	127961966	127962495	530	*	5.57813	4.56987	6.16583	-1.22728	2.72596e-05	0.00121486	25.59	21.91	85.87	57.72
chr7	108093088	108093644	557	*	6.00186	5.19906	6.51461	-1.08367	2.73566e-05	0.00121838	43.04	30.43	91.47	91.39
chrX	30326287	30327152	866	*	6.40682	6.85434	5.75462	0.953714	2.75528e-05	0.00122524	127.94	103.47	55.07	52.91
chr1	7267844	7268392	549	*	6.87312	7.26017	6.34256	0.825994	2.75536e-05	0.00122524	160.51	146.08	82.14	80.17
chr4	155728176	155728583	408	*	5.91749	5.0847	6.44212	-1.10761	2.7565e-05	0.00122524	32.57	35.3	96.14	77.76
chr9	22009424	22009723	300	*	5.23768	4.11035	5.8627	-1.29649	2.76679e-05	0.00122901	16.28	18.26	63.47	52.91
chr16	9319122	9319760	639	*	6.26898	6.74653	5.55021	1.00997	2.77552e-05	0.00123129	119.8	94.95	39.2	54.51
chr1	4886205	4886534	330	*	4.39097	5.13554	2.76733	1.47351	2.77557e-05	0.00123129	32.57	37.74	5.6	8.02
chr7	36167916	36168560	645	*	6.65995	6.03942	7.09245	-0.917816	2.78317e-05	0.00123278	76.77	54.78	144.68	128.27
chr4	84283641	84284218	578	*	5.65901	4.73943	6.21614	-1.17071	2.7833e-05	0.00123278	29.08	24.35	76.54	72.15
chr13	33112782	33113397	616	*	5.32215	4.24918	5.93064	-1.26669	2.78438e-05	0.00123278	19.77	18.26	63.47	58.52
chr12	130516046	130516544	499	*	6.99707	7.37264	6.48794	0.803573	2.80211e-05	0.00123981	175.63	155.82	96.14	83.37
chr16	34422938	34423292	355	*	4.76521	5.4433	3.44321	1.38578	2.81664e-05	0.00124543	39.55	47.48	12.13	9.62
chr16	81763747	81764353	607	*	7.03447	7.40501	6.53457	0.787636	2.81912e-05	0.00124571	170.98	167.99	86.81	98.6
chr14	54970165	54970680	516	*	5.75114	4.85989	6.29795	-1.14967	2.82254e-05	0.00124641	33.73	24.35	81.21	76.16
chr7	29846969	29847429	461	*	5.68719	6.23551	4.79185	1.15085	2.83309e-05	0.00125025	83.74	66.95	23.33	32.07
chr13	40351557	40352256	700	*	6.67876	6.06821	7.10643	-0.907574	2.83731e-05	0.0012513	72.11	62.08	152.14	123.46
chr8	110564191	110564555	365	*	4.90268	3.57316	5.58264	-1.38728	2.84031e-05	0.00125181	11.63	12.17	42.94	52.91
chr11	1411886	1412220	335	*	3.86406	4.71066	1.55461	1.54691	2.84771e-05	0.00125358	25.59	26.78	1.87	4.01
chr6	122797300	122797758	459	*	5.16585	4.00002	5.8021	-1.31465	2.84802e-05	0.00125358	18.61	13.39	52.27	59.32
chr12	1626262	1626741	480	*	6.04725	6.53537	5.30398	1.03786	2.85543e-05	0.00125602	94.21	91.3	42.94	36.07
chr6	97662919	97663389	471	*	6.28168	5.54709	6.76609	-1.02399	2.85863e-05	0.00125661	56.99	36.52	116.67	101.01
chr5	78405704	78406081	378	*	5.79763	6.32342	4.96186	1.11244	2.86186e-05	0.00125721	89.56	70.6	32.67	29.66
chr9	88901908	88902299	392	*	5.05954	3.83893	5.71113	-1.34071	2.87875e-05	0.00126381	12.79	15.83	55.07	49.7
chr19	41770264	41770634	371	*	5.44239	4.4175	6.03556	-1.23641	2.89003e-05	0.00126794	23.26	19.48	71.87	59.32
chr11	75140802	75141241	440	*	5.54972	6.13858	4.53799	1.22493	2.89278e-05	0.00126832	84.91	56	16.8	29.66
chr1	244997060	244997464	405	*	5.18426	4.00002	5.82575	-1.32058	2.89752e-05	0.00126958	18.61	13.39	65.34	48.1
chr18	24393050	24393340	291	*	4.76718	5.45446	3.40784	1.39226	2.93114e-05	0.00128348	51.18	36.52	8.4	12.83
chr2	7147877	7148359	483	*	5.65837	4.74381	6.21369	-1.16849	2.94017e-05	0.00128652	25.59	28	69.07	79.36
chr4	1402249	1402587	339	*	4.56428	5.27208	3.11691	1.42625	2.94187e-05	0.00128652	39.55	37.74	9.33	8.02
chr7	142636567	142637032	466	*	5.61155	6.15703	4.72392	1.14978	2.94973e-05	0.00128831	72.11	70.6	28	24.85
chr9	117179820	117180233	414	*	5.3181	4.24712	5.92596	-1.26342	2.94985e-05	0.00128831	20.94	17.04	60.67	60.93
chr6	42532979	42533385	407	*	5.488	4.46157	6.08167	-1.23694	2.95168e-05	0.00128831	20.94	23.13	79.34	56.12
chr16	88747436	88747896	461	*	5.67979	6.22538	4.79185	1.14412	2.96117e-05	0.00129162	80.26	69.39	23.33	32.07
chr12	104277999	104278384	386	*	5.63834	4.70468	6.2005	-1.17771	2.96365e-05	0.00129187	30.24	21.91	76.54	70.55
chr11	2951463	2952495	1033	*	8.03266	8.31854	7.67577	0.610078	2.9788e-05	0.00129653	352.43	286.07	216.55	192.4
chr2	142938629	142939136	508	*	6.22625	5.51588	6.70012	-1.00472	2.97969e-05	0.00129653	47.69	43.82	104.54	103.41
chr14	76177455	76177882	428	*	6.60706	5.92845	7.06674	-0.971736	2.98009e-05	0.00129653	76.77	45.04	150.28	117.84
chr11	111957124	111957639	516	*	5.53692	4.57152	6.11016	-1.2012	2.98508e-05	0.00129787	24.43	23.13	64.4	73.75
chr4	159778029	159778416	388	*	5.48695	4.4957	6.06898	-1.21477	3.03707e-05	0.00131962	24.43	20.69	70.94	63.33
chr2	239987594	239988086	493	*	5.69881	6.23759	4.8291	1.13964	3.04387e-05	0.00132173	79.09	71.82	33.6	23.25
chr13	98735764	98736145	382	*	4.30919	2.4175	5.10038	-1.5142	3.06075e-05	0.00132821	5.82	4.87	31.74	36.88
chr6	136353114	136353766	653	*	5.89061	5.05153	6.41768	-1.10904	3.06442e-05	0.00132895	39.55	26.78	86.81	84.17
chr1	43751200	43751546	347	*	5.16263	5.78366	4.04866	1.28953	3.07906e-05	0.00133389	65.13	45.04	18.67	14.43
chr17	73583717	73584030	314	*	5.67345	6.21412	4.79869	1.13525	3.07974e-05	0.00133389	79.09	69.39	25.2	30.46
chr1	37074846	37075245	400	*	6.63993	7.06019	6.04447	0.895066	3.08598e-05	0.00133573	150.04	116.86	66.27	65.74
chr21	42539636	42540554	919	*	7.38818	6.91655	7.74302	-0.753469	3.09107e-05	0.00133708	144.23	97.39	212.81	215.65
chr2	61362647	61362969	323	*	4.64369	3.06327	5.37975	-1.45773	3.10013e-05	0.00134014	6.98	9.74	50.4	32.87
chr18	43973217	43973602	386	*	5.43746	6.0161	4.45626	1.21571	3.10386e-05	0.0013409	69.79	59.65	27.07	16.83
chr1	118337704	118338064	361	*	4.68789	3.14271	5.41676	-1.44762	3.11242e-05	0.00134374	12.79	4.87	37.34	48.1
chr15	90035254	90035736	483	*	6.44547	6.87992	5.82086	0.923681	3.11693e-05	0.00134434	117.48	118.08	56.94	56.12
chr1	48559327	48559955	629	*	7.00618	7.37793	6.50409	0.790857	3.11779e-05	0.00134434	175.63	157.04	87.74	93.79
chr19	2291207	2291906	700	*	5.25142	5.84877	4.21358	1.24376	3.12014e-05	0.0013445	60.48	54.78	18.67	18.44
chr10	3494452	3494891	440	*	5.50737	4.5341	6.08331	-1.20331	3.12519e-05	0.00134582	24.43	21.91	69.07	66.54
chr1	44119019	44119433	415	*	5.20728	4.04917	5.84132	-1.30651	3.12773e-05	0.00134606	20.94	12.17	51.34	63.33
chr7	67089994	67090603	610	*	6.38884	6.84045	5.72782	0.95559	3.1467e-05	0.00135287	123.29	105.91	46.67	59.32
chr11	134738405	134738930	526	*	6.73389	7.15181	6.14315	0.889793	3.14755e-05	0.00135287	166.33	118.08	70	71.35
chr7	118837837	118838372	536	*	6.00611	6.5041	5.2394	1.05185	3.15693e-05	0.00135604	101.19	80.34	35.47	40.08
chr6	125513443	125514057	615	*	6.53023	5.85787	6.98705	-0.965477	3.15922e-05	0.00135616	70.95	45.04	139.08	114.64
chr6	125117050	125117473	424	*	5.30466	5.90586	4.25484	1.24474	3.17196e-05	0.00136077	65.13	54.78	14.93	23.25
chrY	15863086	15863696	611	*	5.15385	5.7705	4.05439	1.28136	3.20109e-05	0.00137239	60.48	48.69	19.6	13.63
chr22	43911784	43912116	333	*	4.48585	5.20966	2.96491	1.44145	3.20726e-05	0.00137417	31.4	42.61	8.4	7.21
chr3	10749156	10749605	450	*	5.5328	6.09243	4.60624	1.17614	3.22823e-05	0.00138228	75.6	60.87	27.07	21.64
chr17	15280438	15280866	429	*	5.09255	3.88586	5.74032	-1.3269	3.2348e-05	0.00138417	18.61	10.96	53.2	53.71
chr13	76259471	76259846	376	*	5.56945	4.61438	6.13911	-1.19372	3.23674e-05	0.00138417	19.77	29.22	67.2	73.75
chr17	73857302	73857841	540	*	7.58747	7.90838	7.17414	0.683313	3.26071e-05	0.00139354	268.68	211.81	143.74	145.1
chr8	71060214	71060800	587	*	5.63708	4.70318	6.19932	-1.17588	3.26294e-05	0.00139357	31.4	20.69	70	76.96
chr20	34327706	34328055	350	*	4.90175	3.56987	5.5823	-1.37805	3.2649e-05	0.00139357	12.79	10.96	54.14	41.69
chr15	86135315	86135690	376	*	4.85133	3.50434	5.5356	-1.38656	3.2751e-05	0.00139705	9.3	13.39	43.87	48.9
chr3	127889708	127890184	477	*	6.80084	6.22172	7.21294	-0.874114	3.27955e-05	0.00139806	88.4	60.87	148.41	148.31
chr15	71185285	71185728	444	*	5.93222	5.13332	6.4434	-1.07856	3.29358e-05	0.00140316	34.89	35.3	85.87	88.18
chr6	83073169	83073671	503	*	5.64145	4.70168	6.20577	-1.17816	3.30597e-05	0.00140753	32.57	19.48	74.67	72.95
chr14	57533548	57533993	446	*	6.05031	6.53453	5.31616	1.02636	3.30799e-05	0.00140753	96.54	88.86	42	37.68
chr8	58122131	58123007	877	*	6.15767	6.64763	5.41007	1.03123	3.31126e-05	0.00140803	111.66	88.86	34.54	50.5
chr20	49361041	49361419	379	*	4.8538	3.50089	5.53952	-1.38599	3.31906e-05	0.00141047	10.47	12.17	51.34	41.69
chr22	22734621	22735140	520	*	5.62216	6.17549	4.71309	1.15958	3.32926e-05	0.00141391	84.91	59.65	25.2	27.26
chr2	102313668	102314413	746	*	6.05135	5.24609	6.56509	-1.07935	3.33557e-05	0.00141515	43.04	32.87	109.21	80.17
chr2	121278648	121279243	596	*	7.56497	7.87586	7.16815	0.660062	3.33634e-05	0.00141515	237.28	232.51	140.94	146.7
chr1	230358458	230358839	382	*	5.27005	4.15812	5.89048	-1.27995	3.34151e-05	0.00141645	17.45	18.26	68.14	50.5
chr2	111633968	111634598	631	*	5.24324	5.8696	4.11142	1.29323	3.3443e-05	0.00141674	76.77	40.17	17.73	16.83
chr4	16200773	16201131	359	*	5.19684	3.99758	5.84255	-1.32021	3.35032e-05	0.00141841	19.77	12.17	69.07	45.69
chr1	85864333	85864842	510	*	5.18434	4.05859	5.8089	-1.28854	3.35645e-05	0.00142011	16.28	17.04	56	56.12
chr19	7294755	7295173	419	*	6.20847	6.70205	5.45229	1.04254	3.3618e-05	0.00142149	129.11	79.13	41.07	46.5
chr12	110371876	110372411	536	*	5.25146	4.15812	5.86624	-1.2723	3.37651e-05	0.00142568	17.45	18.26	54.14	62.53
chr5	159402506	159402917	412	*	6.44271	5.78579	6.89242	-0.953904	3.3772e-05	0.00142568	61.65	48.69	110.14	127.46
chr3	143691254	143692302	1049	*	6.84411	6.29413	7.24134	-0.846171	3.37804e-05	0.00142568	80.26	76.69	139.08	163.54
chr7	35225291	35225790	500	*	5.12714	5.74089	4.03713	1.26995	3.40242e-05	0.00143508	55.83	51.13	16.8	16.03
chr1	161834362	161834793	432	*	4.59816	3.05859	5.32587	-1.44157	3.40712e-05	0.00143617	8.14	8.52	40.14	40.08
chr8	17104097	17104829	733	*	5.78551	6.31732	4.93415	1.11187	3.41541e-05	0.00143876	77.93	81.56	24.27	36.88
chr1	212464780	212465255	476	*	5.87753	5.0284	6.40848	-1.11296	3.42998e-05	0.001444	36.06	29.22	96.14	73.75
chr1	171952729	171953090	362	*	5.47836	4.4957	6.05749	-1.20551	3.4501e-05	0.00145157	24.43	20.69	69.07	64.13
chr15	69868171	69868777	607	*	6.737	7.14095	6.17397	0.861741	3.4786e-05	0.00146265	133.76	148.51	80.27	64.13
chr9	33517248	33517782	535	*	6.49912	5.84606	6.94704	-0.946363	3.49174e-05	0.00146727	65.13	49.91	135.34	111.43
chr6	1686863	1687565	703	*	5.7172	4.80792	6.27061	-1.15705	3.5111e-05	0.00147449	25.59	30.43	88.67	65.74
chr6	408619	409209	591	*	5.85803	6.36757	5.06319	1.07654	3.52415e-05	0.00147905	87.23	77.91	36.4	30.46
chr7	93924998	93925491	494	*	6.18353	5.45713	6.66441	-1.01429	3.52722e-05	0.00147942	47.69	40.17	108.27	94.6
chr15	101191536	101191927	392	*	4.74889	3.34063	5.44776	-1.40141	3.55261e-05	0.00148915	9.3	10.96	44.8	42.49
chr18	35104596	35104906	311	*	4.10876	4.89246	2.26434	1.49649	3.55871e-05	0.00149078	31.4	28	5.6	4.01
chr17	28422710	28423106	397	*	5.95321	5.15703	6.46329	-1.07568	3.5715e-05	0.00149521	36.06	35.3	80.27	96.2
chr2	16083477	16083809	333	*	5.0711	5.69531	3.94653	1.28248	3.59441e-05	0.00150323	48.85	54.78	14	16.83
chr20	23042735	23043283	549	*	6.63696	6.04239	7.05678	-0.889636	3.59508e-05	0.00150323	70.95	60.87	137.21	129.07
chr1	37501668	37501977	310	*	4.39691	5.14823	2.73793	1.46903	3.60509e-05	0.0015061	45.36	25.56	9.33	4.01
chr1	7599416	7600196	781	*	6.72276	7.13025	6.15276	0.863491	3.60721e-05	0.0015061	152.37	127.82	65.34	76.96
chr6	53516440	53517217	778	*	6.93154	7.32767	6.38365	0.839898	3.60998e-05	0.0015061	184.94	136.34	75.6	91.39
chr6	155816247	155816654	408	*	5.52732	4.5748	6.0961	-1.18736	3.61084e-05	0.0015061	22.1	25.56	66.27	70.55
chr3	69069444	69069994	551	*	5.08368	3.83893	5.74179	-1.33847	3.63612e-05	0.00151571	12.79	15.83	65.34	41.69
chr15	64973598	64973992	395	*	6.06117	5.28964	6.56115	-1.05133	3.63906e-05	0.001516	45.36	32.87	99.87	88.98
chr8	142639526	142639995	470	*	4.90792	5.56575	3.66425	1.34336	3.64235e-05	0.00151644	56.99	37.74	14.93	10.42
chr14	75380550	75381116	567	*	6.78513	6.22903	7.18551	-0.852212	3.64702e-05	0.00151745	72.11	77.91	137.21	153.92
chr11	22213764	22214170	407	*	4.87618	5.53157	3.64159	1.3348	3.6732e-05	0.00152736	52.34	40.17	12.13	12.83
chr12	54378541	54379445	905	*	7.27978	7.62409	6.82666	0.735996	3.67536e-05	0.00152736	205.87	188.69	126.01	101.01
chr14	57999938	58000316	379	*	5.87375	6.38145	5.08343	1.06659	3.6973e-05	0.00153478	79.09	87.65	31.74	36.07
chr5	75699624	75699934	311	*	5.18075	5.81242	4.03083	1.30337	3.69774e-05	0.00153478	69.79	42.61	21.47	11.22
chr1	26021645	26021980	336	*	5.28199	4.2086	5.89061	-1.25719	3.70938e-05	0.00153867	16.28	20.69	62.54	56.12
chr11	124738841	124739096	256	*	4.85813	5.51503	3.6179	1.34137	3.71622e-05	0.00154056	48.85	42.61	14.93	9.62
chr20	5537719	5538241	523	*	6.03656	5.27512	6.53235	-1.04516	3.73265e-05	0.00154528	36.06	41.39	96.14	88.98
chr13	95068705	95069154	450	*	6.16794	6.63356	5.47615	0.985658	3.73277e-05	0.00154528	101.19	97.39	45.74	43.29
chrX	47713898	47714294	397	*	4.88336	3.56657	5.56015	-1.36512	3.73642e-05	0.00154528	13.96	9.74	49.47	44.89
chr2	15777351	15777847	497	*	6.58036	5.97853	7.00376	-0.897621	3.73674e-05	0.00154528	62.81	63.3	131.61	125.06
chr8	11565314	11565635	322	*	4.77959	5.45891	3.45266	1.36448	3.74986e-05	0.00154976	45.36	42.61	7.47	14.43
chr3	170128252	170128583	332	*	5.94867	5.13109	6.46731	-1.0869	3.78413e-05	0.00156297	37.22	32.87	100.81	76.16
chr2	158192499	158193206	708	*	6.80583	6.21254	7.22501	-0.885208	3.79708e-05	0.00156736	82.58	65.74	171.74	127.46
chr7	149413619	149413971	353	*	4.28704	2.4175	5.07475	-1.49177	3.80933e-05	0.00157146	5.82	4.87	34.54	32.87
chr4	36245672	36246253	582	*	4.45618	5.19479	2.86298	1.44549	3.81865e-05	0.00157434	47.69	25.56	6.53	8.02
chr5	11075117	11075507	391	*	5.0851	5.70618	3.97098	1.28041	3.83106e-05	0.0015785	58.16	46.26	17.73	13.63
chr7	23111692	23112063	372	*	4.75945	3.34063	5.46076	-1.39923	3.83551e-05	0.00157937	9.3	10.96	50.4	37.68
chr6	12234149	12234694	546	*	6.69168	6.10581	7.10717	-0.878913	3.86175e-05	0.00158921	74.44	63.3	147.48	128.27
chr1	185688224	185688640	417	*	4.91807	3.64198	5.58445	-1.34867	3.8774e-05	0.00159468	12.79	12.17	49.47	46.5
chr14	106995564	106995876	313	*	4.5872	5.29264	3.15032	1.40014	3.90293e-05	0.00160421	41.87	36.52	6.53	11.22
chr18	44787577	44787999	423	*	5.23762	5.83551	4.19813	1.23265	3.91375e-05	0.00160768	56.99	57.21	15.87	20.84
chr17	55198570	55199112	543	*	5.96389	5.18358	6.4675	-1.05997	3.93145e-05	0.00161397	33.73	38.95	89.61	87.38
chr4	123221920	123222279	360	*	5.02686	3.78192	5.68503	-1.33613	3.93544e-05	0.00161463	10.47	17.04	58.8	44.09
chr12	124468363	124468841	479	*	6.18337	5.437	6.67282	-1.0279	3.96007e-05	0.00162375	47.69	38.95	116.67	87.38
chr9	92815282	92815717	436	*	5.65337	6.19188	4.78438	1.13202	3.96824e-05	0.00162573	75.6	70.6	32.67	22.45
chrX	152915042	152915507	466	*	5.34125	5.92108	4.35654	1.20721	3.96971e-05	0.00162573	63.97	57.21	23.33	17.64
chr4	13432723	13433281	559	*	5.52835	6.08066	4.62209	1.15377	3.97442e-05	0.00162663	73.28	62.08	25.2	24.05
chr16	20810811	20811413	603	*	5.47963	4.4491	6.07463	-1.22641	3.97897e-05	0.00162663	29.08	14.61	74.67	60.12
chr2	241719559	241719964	406	*	5.37465	5.94851	4.40745	1.19427	3.97911e-05	0.00162663	66.3	57.21	22.4	20.04
chr2	135535874	135536297	424	*	5.38493	5.96078	4.41192	1.19904	3.99073e-05	0.00163039	69.79	54.78	23.33	19.24
chr15	60296422	60296806	385	*	4.45991	5.17819	2.96491	1.42045	3.99388e-05	0.0016307	39.55	32.87	8.4	7.21
chr2	55126958	55127404	447	*	5.72793	4.86393	6.26455	-1.1222	3.9964e-05	0.00163074	30.24	28	78.41	75.36
chr17	34131690	34132174	485	*	7.39238	6.94629	7.73263	-0.720727	3.99908e-05	0.00163085	140.74	105.91	213.75	211.64
chr4	109683654	109684019	366	*	5.01064	5.64355	3.85644	1.29098	4.00471e-05	0.00163217	48.85	51.13	12.13	16.83
chr4	13908718	13909167	450	*	5.23872	4.15812	5.84958	-1.25811	4.01479e-05	0.0016338	17.45	18.26	56	59.32
chr5	77833605	77834013	409	*	5.32107	4.24506	5.93051	-1.25229	4.01518e-05	0.0016338	22.1	15.83	69.07	52.91
chr8	32189138	32189493	356	*	4.74493	3.329	5.44558	-1.3945	4.01595e-05	0.0016338	12.79	7.3	43.87	43.29
chr19	51107737	51108234	498	*	5.48458	6.06295	4.50418	1.19899	4.026e-05	0.0016369	82.58	51.13	20.53	24.85
chr19	32532694	32533153	460	*	6.57233	7.00063	5.96046	0.906565	4.03089e-05	0.00163766	146.55	109.56	58.8	65.74
chr6	99295630	99295995	366	*	5.3379	5.92301	4.33747	1.21841	4.03325e-05	0.00163766	60.48	60.87	25.2	15.23
chr9	131865283	131865926	644	*	6.62493	6.0296	7.04513	-0.88859	4.03512e-05	0.00163766	69.79	60.87	139.08	125.06
chr12	49942779	49943304	526	*	6.35411	6.82125	5.65894	0.984909	4.04166e-05	0.00163933	136.08	90.08	45.74	55.31
chr9	35258744	35259318	575	*	6.87362	6.33579	7.26449	-0.827422	4.04463e-05	0.00163955	86.07	75.47	162.41	145.1
chr11	36500245	36500670	426	*	5.0159	3.77907	5.67188	-1.33076	4.05147e-05	0.00164134	11.63	15.83	57.87	44.09
chr10	43574191	43574714	524	*	5.56401	6.11794	4.65328	1.15163	4.0553e-05	0.00164191	75.6	63.3	21.47	28.86
chr20	20805528	20806048	521	*	6.85499	7.24635	6.31626	0.830795	4.1068e-05	0.00166161	170.98	132.69	78.41	80.97
chr3	130771800	130772273	474	*	5.44121	4.4175	6.03399	-1.22247	4.10885e-05	0.00166161	23.26	19.48	76.54	54.51
chr11	12562554	12563113	560	*	5.97417	5.17387	6.48591	-1.07222	4.11577e-05	0.00166341	44.2	28	88.67	90.59
chr11	125496026	125496699	674	*	5.85407	5.03558	6.37308	-1.08923	4.12802e-05	0.00166737	29.08	36.52	84.01	81.77
chr7	20817537	20818108	572	*	7.10264	7.46576	6.61621	0.77281	4.13228e-05	0.00166809	197.73	155.82	100.81	95.4
chr6	135007078	135007541	464	*	4.0826	1.81412	4.92453	-1.5048	4.13581e-05	0.00166852	5.82	1.22	27.07	33.67
chr18	41678430	41679163	734	*	6.84697	6.27686	7.25452	-0.861564	4.14397e-05	0.00167082	94.21	60.87	153.08	152.32
chr5	86176520	86177075	556	*	7.05917	6.55977	7.42945	-0.784044	4.15886e-05	0.00167582	104.68	84	176.41	168.35
chr5	32794078	32794589	512	*	5.62292	4.70468	6.17956	-1.15888	4.16637e-05	0.00167785	30.24	21.91	67.2	77.76
chr13	30732834	30733308	475	*	5.60887	4.6706	6.17266	-1.16931	4.18594e-05	0.00168473	30.24	20.69	79.34	64.93
chr7	79435607	79436071	465	*	5.49794	4.49743	6.08307	-1.2083	4.20949e-05	0.0016932	23.26	21.91	80.27	55.31
chr1	209171225	209171721	497	*	5.96167	5.18143	6.46526	-1.05684	4.23175e-05	0.00170114	36.06	36.52	93.34	83.37
chr5	43627120	43627498	379	*	6.01427	5.24712	6.51244	-1.04525	4.24647e-05	0.00170504	41.87	34.09	95.21	87.38
chrX	47059658	47060049	392	*	4.74019	3.33289	5.43884	-1.38851	4.24776e-05	0.00170504	11.63	8.52	46.67	40.08
chr5	64106843	64107271	429	*	6.2276	5.4717	6.72107	-1.03344	4.249e-05	0.00170504	54.67	34.09	120.41	90.59
chr2	45711143	45711695	553	*	5.64247	4.70618	6.20555	-1.16736	4.25783e-05	0.00170747	29.08	23.13	85.87	61.73
chr9	36190265	36191228	964	*	6.79625	6.23914	7.19716	-0.847939	4.26087e-05	0.00170747	75.6	75.47	159.61	133.88
chr11	17036555	17036974	420	*	5.72031	6.25812	4.85315	1.11884	4.26375e-05	0.00170747	84.91	68.17	23.33	34.47
chr5	15286767	15287172	406	*	5.04927	3.84438	5.69654	-1.31748	4.26515e-05	0.00170747	10.47	18.26	47.6	56.12
chr18	45058171	45058652	482	*	5.11266	5.72733	4.01966	1.25809	4.2807e-05	0.00171268	51.18	54.78	14	18.44
chr14	106877349	106877691	343	*	5.04742	5.67214	3.92113	1.27979	4.28942e-05	0.00171516	58.16	43.82	15.87	14.43
chr5	95116703	95117305	603	*	7.07575	6.58824	7.43948	-0.770616	4.30556e-05	0.00171973	102.35	90.08	176.41	170.75
chr11	8790095	8790578	484	*	5.17056	4.05624	5.7917	-1.2723	4.30593e-05	0.00171973	17.45	15.83	52.27	58.52
chr17	38446962	38447355	394	*	5.71574	4.7953	6.27317	-1.15583	4.31454e-05	0.00172201	36.06	19.48	84.94	69.74
chr10	102268398	102268863	466	*	6.23843	5.53073	6.71113	-0.993682	4.31672e-05	0.00172201	53.5	38.95	110.14	99.41
chr11	111722362	111722729	368	*	5.33683	4.29064	5.93686	-1.2335	4.35253e-05	0.00173469	22.1	17.04	67.2	55.31
chr15	95828258	95828726	469	*	5.14223	4.00977	5.76878	-1.28106	4.35488e-05	0.00173469	13.96	18.26	56.94	52.11
chr15	30277451	30277983	533	*	5.61726	6.16086	4.73467	1.13739	4.3562e-05	0.00173469	63.97	79.13	30.8	22.45
chr14	105635437	105635863	427	*	6.56678	6.9887	5.96794	0.897079	4.36087e-05	0.00173553	139.57	114.43	69.07	56.12
chr13	53436503	53436904	402	*	6.21809	6.68415	5.52532	0.97833	4.39562e-05	0.00174814	105.84	99.82	39.2	52.91
chr1	152452490	152452988	499	*	6.20294	6.67176	5.504	0.990026	4.39771e-05	0.00174814	117.48	86.43	46.67	44.09
chr7	93918260	93918714	455	*	7.31518	6.87245	7.65347	-0.716375	4.4119e-05	0.00175189	117.48	116.86	211.88	190.79
chr22	22414895	22415506	612	*	7.46123	7.77719	7.05607	0.671251	4.41233e-05	0.00175189	224.48	214.25	136.28	129.87
chr8	63160526	63161001	476	*	4.71825	5.39588	3.39808	1.36323	4.41928e-05	0.00175267	47.69	36.52	13.07	8.02
chr1	18246415	18246728	314	*	4.95179	5.58743	3.78812	1.29527	4.41946e-05	0.00175267	52.34	43.82	14	13.63
chr2	240745901	240746325	425	*	4.88967	5.53832	3.6798	1.31224	4.42694e-05	0.0017546	43.04	49.91	11.2	14.43
chr2	239924554	239924939	386	*	5.37742	4.32705	5.97879	-1.23438	4.43729e-05	0.00175768	26.75	13.39	64.4	61.73
chr4	71049383	71049746	364	*	5.36382	5.9355	4.40297	1.18541	4.44548e-05	0.00175989	63.97	58.43	21.47	20.84
chr12	30593678	30594181	504	*	6.07742	5.33482	6.56526	-1.0241	4.4511e-05	0.00176108	44.2	36.52	98.01	91.39
chr21	45533728	45534455	728	*	7.07916	7.43903	6.59859	0.76109	4.46118e-05	0.00176404	180.28	166.77	89.61	104.22
chr12	66093009	66093411	403	*	5.43434	4.42116	6.02367	-1.21431	4.46687e-05	0.00176526	20.94	21.91	75.6	54.51
chr17	34091030	34091991	962	*	8.68172	8.90566	8.41652	0.473548	4.47251e-05	0.00176646	497.82	461.37	354.69	328.68
chr10	43471073	43471554	482	*	4.96188	5.60236	3.78122	1.30126	4.486e-05	0.00177075	56.99	40.17	13.07	14.43
chr5	33181029	33181447	419	*	4.95161	3.70468	5.6103	-1.32841	4.49452e-05	0.00177288	15.12	10.96	50.4	47.3
chr17	4686020	4686363	344	*	4.69307	5.37581	3.3523	1.362	4.49663e-05	0.00177288	46.52	36.52	8.4	12.02
chr8	30015058	30015664	607	*	6.26181	5.52649	6.74652	-1.01571	4.50686e-05	0.00177578	59.32	32.87	112.94	101.81
chr13	113164274	113164708	435	*	5.95021	5.15264	6.46086	-1.06724	4.51016e-05	0.00177578	40.71	30.43	95.21	80.97
chr1	5681122	5681419	298	*	4.5208	5.24918	2.97806	1.41598	4.51296e-05	0.00177578	39.55	36.52	3.73	12.02
chr10	74003788	74004243	456	*	5.51726	4.56822	6.08483	-1.17638	4.51447e-05	0.00177578	26.75	20.69	64.4	71.35
chr10	129362128	129362628	501	*	6.77772	7.16819	6.24065	0.826064	4.52486e-05	0.00177883	148.88	138.78	71.87	79.36
chr12	100013567	100014039	473	*	6.19997	6.66466	5.51027	0.98271	4.5358e-05	0.00178053	112.82	90.08	49.47	41.69
chr2	26951043	26951655	613	*	6.7377	7.13165	6.19402	0.834407	4.53702e-05	0.00178053	146.55	133.91	71.87	74.55
chr9	138508045	138508506	462	*	5.66366	6.20065	4.79869	1.11823	4.53706e-05	0.00178053	82.58	64.52	25.2	30.46
chr5	81403114	81403482	369	*	5.30222	4.24712	5.90509	-1.23702	4.54428e-05	0.00178233	20.94	17.04	65.34	54.51
chr4	2420285	2420805	521	*	6.29472	6.74089	5.64539	0.942467	4.57093e-05	0.00179174	111.66	102.26	50.4	49.7
chr13	102127015	102127403	389	*	5.74855	4.88982	6.28318	-1.11338	4.58788e-05	0.00179706	33.73	25.56	81.21	74.55
chr8	10773356	10773668	313	*	4.35315	5.0847	2.79498	1.42584	4.58982e-05	0.00179706	32.57	35.3	7.47	6.41
chr6	16713434	16713894	461	*	5.76319	4.92301	6.29069	-1.10241	4.59705e-05	0.00179885	30.24	30.43	75.6	80.97
chr7	2599719	2600161	443	*	5.64009	4.7365	6.19143	-1.14541	4.60834e-05	0.00180223	31.4	21.91	70	76.16
chr14	96032477	96033020	544	*	6.01429	6.51246	5.24714	1.04221	4.61307e-05	0.0018024	104.68	77.91	32.67	43.29
chr15	41314620	41315063	444	*	6.27881	5.58417	6.74571	-0.98162	4.6141e-05	0.0018024	56.99	38.95	106.41	108.22
chr19	1768308	1768691	384	*	6.23771	6.7043	5.54377	0.984516	4.62437e-05	0.00180537	122.13	86.43	47.6	45.69
chr13	25823236	25823721	486	*	5.93628	5.09784	6.4631	-1.09686	4.63148e-05	0.00180711	45.36	23.13	91.47	84.98
chr1	42065574	42066028	455	*	5.68081	4.76476	6.23666	-1.15119	4.63998e-05	0.00180938	34.89	19.48	80.27	70.55
chr12	8230954	8231363	410	*	5.63403	4.73943	6.18207	-1.1388	4.65451e-05	0.0018136	29.08	24.35	74.67	70.55
chr1	85069986	85070675	690	*	6.79272	6.2502	7.18605	-0.832415	4.6573e-05	0.0018136	76.77	75.47	149.34	141.89
chr15	79243340	79243683	344	*	4.74728	3.33289	5.44757	-1.38441	4.65885e-05	0.0018136	11.63	8.52	50.4	36.88
chrX	46763085	46763784	700	*	7.4886	7.07416	7.81017	-0.680343	4.68728e-05	0.00182359	146.55	122.95	226.81	222.06
chr8	124166840	124167383	544	*	6.39225	5.74089	6.83937	-0.941451	4.6899e-05	0.00182359	55.83	51.13	123.21	105.82
chr20	4207568	4208066	499	*	6.0892	5.30699	6.59359	-1.05507	4.70208e-05	0.00182728	51.18	28	90.54	102.61
chr9	32395636	32396124	489	*	5.13167	4.0049	5.75653	-1.27461	4.74014e-05	0.00184101	16.28	15.83	50.4	57.72
chr3	159647159	159647601	443	*	5.06428	3.89377	5.70187	-1.29352	4.74453e-05	0.00184134	15.12	14.61	56	48.1
chr7	38403027	38403366	340	*	6.77794	7.17266	6.23277	0.839827	4.74642e-05	0.00184134	155.86	132.69	83.07	67.34
chr4	113435769	113436252	484	*	5.15682	5.76011	4.10038	1.23577	4.75989e-05	0.00184551	51.18	57.21	15.87	18.44
chr17	1927232	1927809	578	*	5.80704	6.31732	5.01034	1.07163	4.7694e-05	0.00184814	77.93	81.56	36.4	28.06
chr5	66445782	66446129	348	*	5.49003	4.4957	6.0731	-1.19979	4.7751e-05	0.00184929	24.43	20.69	79.34	55.31
chr21	45994288	45994747	460	*	4.81423	5.47434	3.56199	1.3325	4.80053e-05	0.00185807	51.18	37.74	14	9.62
chr3	153839511	153840421	911	*	5.16238	5.77265	4.08367	1.24404	4.81932e-05	0.00186428	56.99	52.35	13.07	20.84
chr1	40663179	40663735	557	*	5.41378	4.41933	5.99689	-1.20077	4.83069e-05	0.0018666	22.1	20.69	70	57.72
chr2	203143646	203144097	452	*	5.52572	4.56492	6.09737	-1.17912	4.83118e-05	0.0018666	29.08	18.26	72.8	64.13
chr6	159416059	159416639	581	*	4.77081	3.4175	5.45663	-1.3644	4.8336e-05	0.0018666	11.63	9.74	42.94	44.89
chr7	132474007	132474478	472	*	4.68072	3.1777	5.40072	-1.41054	4.85535e-05	0.00187393	3.49	14.61	42	42.49
chr5	2755217	2755549	333	*	5.68868	6.22224	4.83272	1.11314	4.86153e-05	0.00187525	87.23	62.08	28.94	28.06
chr2	202572466	202572911	446	*	5.03767	3.8252	5.68703	-1.30888	4.86966e-05	0.00187679	18.61	9.74	54.14	48.9
chr3	184204394	184204651	258	*	3.1925	0	4.1925	-1.04776	4.87108e-05	0.00187679	0	0	20.53	16.03
chr2	220969674	220970125	452	*	5.65445	4.77193	6.19802	-1.13062	4.88588e-05	0.00188142	29.08	25.56	69.07	77.76
chr20	5107029	5107769	741	*	7.5716	7.17266	7.88379	-0.660639	4.88938e-05	0.0018817	155.86	132.69	234.28	238.09
chr12	103344118	103344526	409	*	5.27759	5.86191	4.27951	1.20467	4.89521e-05	0.00188207	63.97	52.35	19.6	19.24
chr12	64195789	64196162	374	*	5.40437	4.4175	5.98493	-1.19671	4.8959e-05	0.00188207	23.26	19.48	62.54	64.13
chr1	14140094	14140520	427	*	6.87688	7.25838	6.35674	0.808813	4.90768e-05	0.00188553	168.65	137.56	82.14	81.77
chr3	25482644	25483186	543	*	6.29331	5.6227	6.74933	-0.960176	4.91141e-05	0.00188589	53.5	45.04	104.54	110.63
chr5	7394927	7395432	506	*	5.38921	5.97107	4.39847	1.19984	4.91741e-05	0.0018871	76.77	48.69	20.53	21.64
chr3	185624873	185625415	543	*	5.99886	5.22799	6.49858	-1.04514	4.92013e-05	0.0018871	37.22	37.74	99.87	80.97
chr15	38116877	38117222	346	*	4.72754	3.33289	5.42323	-1.37512	4.95283e-05	0.00189857	11.63	8.52	45.74	40.08
chr20	60173987	60174480	494	*	5.17343	5.78366	4.09483	1.24572	4.96791e-05	0.00190327	65.13	45.04	14.93	19.24
chr5	140571579	140572126	548	*	6.06319	6.54876	5.32587	1.02003	4.98276e-05	0.00190788	109.33	77.91	40.14	40.08
chr16	82377691	82378151	461	*	5.48062	6.03438	4.57035	1.1487	4.98558e-05	0.00190788	60.48	70.6	24.27	23.25
chr20	41872349	41872654	306	*	4.84869	5.49656	3.64159	1.30743	5.00814e-05	0.00191543	47.69	42.61	12.13	12.83
chr18	49194495	49194843	349	*	5.56657	6.11035	4.6835	1.12713	5.01307e-05	0.00191623	65.13	73.04	23.33	28.06
chr11	133817231	133817622	392	*	5.6255	6.16819	4.74534	1.13476	5.02194e-05	0.00191854	74.44	69.39	33.6	20.04
chr12	94539391	94539777	387	*	5.49646	4.52903	6.0704	-1.1819	5.03374e-05	0.00192196	27.91	18.26	71.87	62.53
chr8	2027416	2028015	600	*	6.67212	7.07979	6.10177	0.860702	5.04514e-05	0.00192523	150.04	120.52	64.4	72.95
chr5	54528755	54529681	927	*	5.9637	6.47214	5.17156	1.06244	5.0578e-05	0.00192897	108.17	69.39	33.6	38.48
chr10	30799455	30799838	384	*	5.05514	3.89114	5.69088	-1.28788	5.06886e-05	0.0019321	16.28	13.39	50.4	52.91
chr1	153651595	153652288	694	*	6.38332	6.83071	5.7314	0.941064	5.07887e-05	0.00193342	130.27	97.39	48.54	57.72
chr8	140668440	140668820	381	*	4.93762	5.57316	3.77429	1.2854	5.08172e-05	0.00193342	46.52	48.69	12.13	15.23
chr4	39660382	39660731	350	*	4.39446	2.71365	5.14986	-1.44116	5.08306e-05	0.00193342	5.82	7.3	37.34	33.67
chr10	88122913	88123245	333	*	4.29146	5.0308	2.69455	1.42575	5.08373e-05	0.00193342	33.73	31.65	6.53	6.41
chr8	68251645	68252053	409	*	5.68451	4.76476	6.2417	-1.15021	5.09487e-05	0.00193656	34.89	19.48	84.01	67.34
chr11	75479017	75479561	545	*	5.24782	5.84401	4.21358	1.22397	5.10233e-05	0.00193831	68.62	46.26	18.67	18.44
chr10	88720056	88720629	574	*	7.54191	7.8519	7.14657	0.656507	5.11501e-05	0.00194171	246.58	215.47	139.08	144.3
chr3	16558632	16559086	455	*	5.87423	5.05153	6.39489	-1.08305	5.117e-05	0.00194171	39.55	26.78	90.54	77.76
chr22	43363934	43364362	429	*	5.75786	4.92301	6.28328	-1.09551	5.13269e-05	0.00194657	30.24	30.43	75.6	80.17
chr20	42824961	42825449	489	*	4.45005	2.83619	5.19273	-1.42788	5.16814e-05	0.00195892	6.98	7.3	35.47	37.68
chr13	31147136	31147529	394	*	4.46499	2.8471	5.20845	-1.42954	5.1922e-05	0.00196543	4.65	9.74	35.47	38.48
chr17	66016031	66016611	581	*	6.61341	7.02256	6.04015	0.864025	5.19322e-05	0.00196543	140.74	119.3	63.47	68.14
chr12	58021234	58021708	475	*	5.52924	6.08899	4.60234	1.16106	5.19404e-05	0.00196543	82.58	53.56	26.14	22.45
chrX	122904279	122904716	438	*	4.78765	3.43207	5.47402	-1.36294	5.20672e-05	0.00196913	6.98	14.61	44.8	44.09
chr7	28575895	28576236	342	*	5.1158	3.94153	5.75447	-1.28826	5.23249e-05	0.00197687	19.77	10.96	60.67	47.3
chr10	4554993	4555418	426	*	5.94817	5.12662	6.46839	-1.08065	5.23304e-05	0.00197687	41.87	28	101.74	75.36
chr14	22446374	22446927	554	*	6.01153	6.49483	5.27951	1.01439	5.25456e-05	0.0019839	100.03	80.34	39.2	38.48
chr10	105883222	105883503	282	*	4.68139	3.243	5.38716	-1.38489	5.26627e-05	0.00198721	11.63	7.3	36.4	47.3
chr1	152469814	152470184	371	*	4.71414	5.38145	3.43445	1.3342	5.29023e-05	0.0019941	39.55	43.82	11.2	10.42
chrX	64114358	64114976	619	*	5.52764	6.07112	4.64539	1.12796	5.29042e-05	0.0019941	66.3	68.17	25.2	24.85
chr9	140916585	140917129	545	*	6.32141	7.08598	4.58988	1.44642	5.29637e-05	0.00199523	151.21	120.52	34.54	13.63
chr5	121302886	121303334	449	*	4.64973	3.14271	5.37059	-1.39941	5.34082e-05	0.00201086	12.79	4.87	46.67	36.07
chr1	54535513	54536197	685	*	6.66997	6.06588	7.09448	-0.89177	5.34421e-05	0.00201102	76.77	57.21	153.08	120.25
chr2	219874653	219875342	690	*	5.98983	6.47566	5.25192	1.02011	5.39136e-05	0.0020269	98.87	79.13	40.14	36.07
chr17	45356865	45357248	384	*	4.57777	3.04444	5.30418	-1.40607	5.39241e-05	0.0020269	11.63	4.87	37.34	41.69
chr9	127267698	127268063	366	*	4.87345	5.51759	3.6798	1.29557	5.41014e-05	0.00203244	45.36	46.26	11.2	14.43
chr3	11033564	11033965	402	*	4.97557	5.61199	3.80919	1.28161	5.41942e-05	0.00203479	43.04	54.78	11.2	16.83
chr11	111867403	111867829	427	*	5.45724	4.49396	6.02975	-1.17765	5.43591e-05	0.00203985	25.59	19.48	68.14	62.53
chr14	29987592	29987878	287	*	4.40999	2.72552	5.16606	-1.43731	5.43915e-05	0.00203994	3.49	9.74	37.34	34.47
chr10	28539687	28540132	446	*	5.19812	4.10126	5.81397	-1.25086	5.46187e-05	0.00204639	20.94	13.39	58.8	53.71
chr2	233994022	233994492	471	*	5.83898	6.36188	5.01059	1.08865	5.46452e-05	0.00204639	101.19	63.3	30.8	33.67
chr5	53386508	53386907	400	*	5.34462	4.33676	5.9322	-1.20452	5.46543e-05	0.00204639	20.94	19.48	64.4	57.72
chr17	42733221	42733710	490	*	5.19966	5.79216	4.17683	1.21287	5.50338e-05	0.00205919	51.18	59.65	17.73	18.44
chr2	237085101	237085426	326	*	6.68901	7.08771	6.13618	0.845701	5.5057e-05	0.00205919	144.23	127.82	76.54	64.13
chr21	43870008	43870491	484	*	6.2443	6.69812	5.5785	0.954139	5.54131e-05	0.00207137	115.15	92.52	46.67	48.9
chr2	72222101	72222602	502	*	5.94992	5.18358	6.44776	-1.04075	5.54714e-05	0.00207169	33.73	38.95	89.61	84.98
chr2	10133629	10134085	457	*	4.51853	2.93898	5.25441	-1.41358	5.54831e-05	0.00207169	10.47	4.87	41.07	35.27
chr3	120003892	120004404	513	*	5.49981	6.06035	4.57069	1.15151	5.56123e-05	0.00207538	61.65	71.82	18.67	28.86
chr9	35661136	35661480	345	*	5.13855	4.00002	5.76689	-1.2696	5.58314e-05	0.0020824	18.61	13.39	61.6	47.3
chr8	35744641	35745014	374	*	5.53732	6.09415	4.61856	1.14464	5.59902e-05	0.00208634	72.11	64.52	18.67	30.46
chr14	66825940	66826584	645	*	5.75905	4.91785	6.28694	-1.09573	5.59985e-05	0.00208634	34.89	25.56	78.41	77.76
chr12	40352065	40352529	465	*	4.8527	3.56987	5.52083	-1.33046	5.62218e-05	0.0020935	12.79	10.96	48.54	43.29
chr1	205779536	205780077	542	*	5.02065	3.84166	5.66066	-1.2908	5.64188e-05	0.00209968	11.63	17.04	52.27	48.9
chr1	193159449	193159843	395	*	4.52819	2.93387	5.26702	-1.41464	5.66021e-05	0.00210535	11.63	3.65	40.14	36.88
chr16	2346520	2347092	573	*	6.31933	6.7628	5.67577	0.935543	5.68235e-05	0.00211242	119.8	97.39	54.14	48.1
chr1	3823811	3824114	304	*	4.95143	5.58499	3.79498	1.28162	5.68775e-05	0.00211295	55.83	40.17	14.93	12.83
chr7	8483468	8484335	868	*	5.38388	5.94851	4.44321	1.16725	5.69001e-05	0.00211295	66.3	57.21	24.27	19.24
chr21	37305801	37306257	457	*	5.3962	4.42116	5.97275	-1.18552	5.69566e-05	0.00211389	20.94	21.91	60.67	64.93
chr2	217381440	217381853	414	*	6.36554	5.70393	6.81742	-0.947316	5.69889e-05	0.00211393	61.65	42.61	115.74	109.83
chr13	26611426	26611880	455	*	6.1018	6.59167	5.35442	1.02521	5.71308e-05	0.00211803	118.64	74.26	40.14	41.69
chr7	100943213	100943848	636	*	4.7779	5.437	3.52944	1.31573	5.72533e-05	0.00212141	47.69	38.95	10.27	12.83
chr3	62318402	62319012	611	*	5.93176	5.11035	6.45192	-1.07991	5.73741e-05	0.00212472	32.57	36.52	104.54	70.55
chr12	50478691	50479127	437	*	6.91311	6.3982	7.2918	-0.798595	5.74375e-05	0.00212591	89.56	79.13	164.28	149.11
chr11	123173465	123173717	253	*	4.32686	2.55996	5.09761	-1.44203	5.76024e-05	0.00213085	8.14	3.65	30.8	37.68
chr6	141523986	141524300	315	*	4.27764	2.43929	5.06034	-1.45135	5.77876e-05	0.00213653	2.33	8.52	35.47	31.26
chr12	44351559	44351969	411	*	5.34792	4.34063	5.93531	-1.20268	5.78806e-05	0.0021388	18.61	21.91	66.27	56.12
chr14	80050939	80051353	415	*	5.04642	3.89114	5.67964	-1.2774	5.80312e-05	0.0021432	16.28	13.39	50.4	52.11
chr3	46118149	46118423	275	*	4.57074	3.06327	5.29169	-1.39617	5.81051e-05	0.00214386	6.98	9.74	43.87	34.47
chr19	50393195	50393822	628	*	7.99652	8.26784	7.66206	0.575495	5.81124e-05	0.00214386	329.16	287.29	211.88	193.2
chr21	43801414	43801896	483	*	6.83865	7.22002	6.31875	0.804148	5.86036e-05	0.00216065	158.18	139.99	74.67	84.98
chr17	20811591	20812135	545	*	6.74756	6.20331	7.14181	-0.832384	5.86356e-05	0.00216065	76.77	70.6	138.14	144.3
chr7	91582895	91583332	438	*	4.57959	3.04444	5.30638	-1.39949	5.86634e-05	0.00216065	11.63	4.87	43.87	35.27
chr15	83348924	83349616	693	*	4.72413	5.39402	3.43445	1.33261	5.87236e-05	0.00216169	50.01	34.09	11.2	10.42
chr4	134073025	134073515	491	*	5.65699	6.18089	4.82604	1.08716	5.904e-05	0.00217216	73.28	71.82	27.07	29.66
chr6	78160670	78161015	346	*	4.44679	2.83071	5.1899	-1.41649	5.91366e-05	0.00217453	8.14	6.09	40.14	32.87
chr1	235781091	235781549	459	*	5.96568	5.20012	6.4632	-1.0373	5.93899e-05	0.00218266	41.87	31.65	85.87	90.59
chr1	200885256	200885790	535	*	5.34857	5.91979	4.38904	1.17842	5.94849e-05	0.00218497	66.3	54.78	24.27	17.64
chr2	173648023	173648456	434	*	5.08262	3.94914	5.70947	-1.2669	5.98049e-05	0.00219553	16.28	14.61	48.54	56.12
chr11	42792059	42792518	460	*	5.10996	5.72216	4.02501	1.24925	5.98861e-05	0.00219732	59.32	46.26	20.53	12.02
chr2	80313877	80314206	330	*	4.80646	3.50089	5.48042	-1.3357	5.99693e-05	0.00219918	10.47	12.17	47.6	41.69
chr9	107543071	107543426	356	*	5.34627	4.3006	5.94614	-1.22201	6.00934e-05	0.00220253	16.28	23.13	72.8	50.5
chr16	29203556	29204006	451	*	5.46086	6.01489	4.54987	1.14564	6.02372e-05	0.00220661	72.11	57.21	25.2	21.64
chr17	66530238	66530674	437	*	5.1875	4.10581	5.79869	-1.24146	6.04321e-05	0.00221255	18.61	15.83	50.4	60.93
chr6	1477647	1477986	340	*	4.64532	3.13827	5.36619	-1.3907	6.06402e-05	0.00221897	13.96	3.65	39.2	43.29
chr18	53528433	53528997	565	*	6.09186	5.36404	6.57335	-1.0075	6.09838e-05	0.00223034	34.89	47.48	99.87	90.59
chr19	3783621	3784125	505	*	5.74254	6.27636	4.88594	1.10485	6.11297e-05	0.00223447	95.38	59.65	27.07	32.07
chr16	56827465	56827894	430	*	5.64189	4.77193	6.18076	-1.11422	6.11745e-05	0.0022349	29.08	25.56	73.74	71.35
chr14	37132115	37132772	658	*	5.00439	5.6412	3.83662	1.27412	6.13099e-05	0.00223864	52.34	47.48	9.33	19.24
chr10	115998998	115999653	656	*	5.40603	5.96767	4.47383	1.15901	6.1377e-05	0.00223966	56.99	68.17	25.2	19.24
chr5	2070899	2071291	393	*	4.00418	4.79811	2.09483	1.45004	6.1404e-05	0.00223966	33.73	21.91	3.73	4.81
chr15	75913065	75913466	402	*	5.28211	4.24506	5.87922	-1.2151	6.16247e-05	0.0022465	22.1	15.83	61.6	56.12
chr1	218524883	218525308	426	*	5.34328	4.33094	5.93233	-1.20207	6.17256e-05	0.00224897	24.43	15.83	58.8	63.33
chr5	118806539	118806946	408	*	5.64569	4.77193	6.18599	-1.11584	6.17729e-05	0.00224948	29.08	25.56	77.47	68.14
chr11	30218087	30218537	451	*	6.60191	7.00521	6.04015	0.849194	6.18204e-05	0.00225	129.11	127.82	63.47	68.14
chr10	12991288	12991677	390	*	4.66974	5.33966	3.37994	1.32958	6.19304e-05	0.00225249	38.38	42.61	11.2	9.62
chr20	49242572	49243118	547	*	7.15683	7.49786	6.70939	0.720532	6.19555e-05	0.00225249	183.77	177.73	102.67	106.62
chr22	23027413	23027740	328	*	5.87024	6.37183	5.09483	1.04095	6.21057e-05	0.00225674	76.77	88.86	29.87	38.48
chr4	6046577	6046899	323	*	4.73513	5.39866	3.46992	1.3165	6.21897e-05	0.00225858	44.2	40.17	9.33	12.83
chr13	110790045	110790384	340	*	5.14169	5.74016	4.10038	1.21738	6.22559e-05	0.00225977	56.99	49.91	15.87	18.44
chr13	25319881	25320176	296	*	4.28516	5.03199	2.64983	1.41255	6.2299e-05	0.00226013	32.57	32.87	3.73	8.82
chr14	72570746	72571142	397	*	6.47737	6.8941	5.88901	0.87896	6.24319e-05	0.00226373	119.8	118.08	61.6	56.92
chr6	74797669	74797953	285	*	4.51298	2.94407	5.24671	-1.40241	6.25825e-05	0.00226692	9.3	6.09	43.87	32.07
chr12	80586737	80587059	323	*	5.08858	3.94407	5.71867	-1.26889	6.25966e-05	0.00226692	18.61	12.17	47.6	57.72
chr15	28266785	28267067	283	*	4.18544	4.94407	2.48697	1.42643	6.26204e-05	0.00226692	37.22	24.35	5.6	5.61
chr8	55382557	55383247	691	*	5.42133	5.98685	4.4781	1.16718	6.26537e-05	0.00226692	73.28	53.56	26.14	18.44
chrX	105066735	105067186	452	*	4.25217	4.9988	2.6179	1.41833	6.27125e-05	0.00226783	38.38	25.56	7.47	4.81
chr10	7450404	7450973	570	*	6.57816	6.98517	6.00912	0.855791	6.28868e-05	0.00227292	126.78	126.6	60.67	68.14
chr5	34905648	34906196	549	*	5.92625	5.15374	6.42664	-1.04064	6.32783e-05	0.00228585	39.55	31.65	88.67	83.37
chr13	112722258	112722549	292	*	3.98276	4.77336	2.09483	1.44514	6.33901e-05	0.00228867	27.91	26.78	3.73	4.81
chr17	48653130	48653629	500	*	5.41736	5.98287	4.4742	1.15804	6.35226e-05	0.00229223	54.67	71.82	19.6	24.85
chr17	1998227	1998644	418	*	5.37945	4.38707	5.96186	-1.19212	6.37192e-05	0.0022981	16.28	25.56	65.34	59.32
chr11	133701242	133701550	309	*	4.56279	5.2502	3.20286	1.35324	6.385e-05	0.00230159	38.38	37.74	11.2	7.21
chr15	38273848	38274397	550	*	5.53356	4.61119	6.09169	-1.14797	6.39542e-05	0.00230412	22.1	26.78	74.67	61.73
chr12	510608	511700	1093	*	6.19493	5.49223	6.66543	-0.981978	6.41327e-05	0.00230932	53.5	36.52	103.61	99.41
chr5	170653129	170653468	340	*	4.61053	3.15154	5.32092	-1.37555	6.43792e-05	0.00231589	10.47	7.3	43.87	36.07
chr17	40700024	40700661	638	*	6.32679	6.76926	5.68535	0.925922	6.43923e-05	0.00231589	98.87	119.3	47.6	55.31
chr6	17584399	17585056	658	*	6.93545	6.43137	7.30828	-0.786231	6.44431e-05	0.00231589	83.74	88.86	167.08	149.91
chr19	6047824	6048351	528	*	6.82924	6.30627	7.21225	-0.807623	6.44518e-05	0.00231589	77.93	80.34	153.08	143.5
chr13	113548589	113548947	359	*	4.07847	4.8572	2.26434	1.43881	6.4508e-05	0.00231668	36.06	21.91	5.6	4.01
chr11	70023261	70023775	515	*	7.19787	7.536	6.75542	0.717389	6.48927e-05	0.00232926	184.94	186.25	116.67	99.41
chr20	43709489	43709908	420	*	5.5503	4.64667	6.10165	-1.13661	6.4971e-05	0.00233083	22.1	28	70	67.34
chr17	73779340	73779810	471	*	6.37914	5.73943	6.82079	-0.925018	6.50591e-05	0.00233275	58.16	48.69	119.47	106.62
chr10	94179707	94180276	570	*	6.41969	5.78933	6.85691	-0.916424	6.51002e-05	0.00233299	55.83	54.78	126.01	105.82
chr9	71764377	71764819	443	*	4.70447	3.33676	5.39376	-1.34983	6.54894e-05	0.0023457	10.47	9.74	44.8	39.28
chr5	78316826	78317239	414	*	6.80584	6.26955	7.19592	-0.820513	6.55709e-05	0.00234738	84.91	69.39	152.14	141.09
chr15	61487284	61487927	644	*	6.15531	5.437	6.63267	-0.994058	6.58724e-05	0.00235692	47.69	38.95	111.07	87.38
chr12	24933982	24934324	343	*	5.36359	4.37958	5.94318	-1.18389	6.59678e-05	0.00235909	20.94	20.69	65.34	57.72
chr12	69782140	69782596	457	*	5.92412	5.12438	6.43564	-1.05993	6.62355e-05	0.00236741	44.2	25.56	84.94	88.18
chr1	64140041	64140505	465	*	6.58193	6.00429	6.99329	-0.866021	6.63486e-05	0.0023702	66.3	62.08	124.14	130.67
chr17	81057233	81057558	326	*	4.69397	5.35833	3.42563	1.3159	6.64247e-05	0.00237158	41.87	40.17	10.27	11.22
chr2	120144861	120145215	355	*	4.70522	3.34063	5.39376	-1.34858	6.64573e-05	0.00237158	9.3	10.96	44.8	39.28
chr14	92601581	92602054	474	*	5.36158	4.37581	5.94177	-1.18493	6.65741e-05	0.0023745	23.26	18.26	58.8	64.13
chr20	55091020	55091440	421	*	5.09204	3.9542	5.72017	-1.26275	6.66794e-05	0.002377	13.96	17.04	59.74	45.69
chr1	201845192	201845635	444	*	5.85789	5.06327	6.36734	-1.06028	6.68878e-05	0.00238318	27.91	38.95	79.34	85.78
chr7	91677754	91678070	317	*	4.79722	3.43568	5.48503	-1.35033	6.70703e-05	0.00238842	5.82	15.83	38.27	51.31
chr1	65681231	65681620	390	*	5.68593	4.83208	6.2187	-1.09926	6.74457e-05	0.00240053	31.4	25.56	78.41	70.55
chr11	68780718	68781276	559	*	7.15206	6.68072	7.50675	-0.748266	6.75847e-05	0.00240344	116.31	88.86	174.54	189.19
chr6	107739312	107739818	507	*	5.81666	4.9988	6.33542	-1.07295	6.76307e-05	0.00240344	38.38	25.56	82.14	79.36
chr5	140235292	140236331	1040	*	5.45022	6.00185	4.54581	1.13661	6.76342e-05	0.00240344	70.95	57.21	24.27	22.45
chr7	24324535	24324851	317	*	4.52057	5.23886	3.02551	1.38155	6.78398e-05	0.00240949	51.18	24.35	7.47	8.82
chr6	52272135	52272542	408	*	5.10411	3.93898	5.74016	-1.27117	6.79405e-05	0.0024118	20.94	9.74	58.8	48.1
chr4	185018418	185018776	359	*	5.69105	6.21254	4.86624	1.07865	6.82098e-05	0.00242009	82.58	65.74	27.07	31.26
chr1	243100047	243100369	323	*	3.90957	4.71066	1.95268	1.44229	6.83887e-05	0.00242517	25.59	26.78	3.73	4.01
chr11	12782573	12783008	436	*	5.53398	4.61278	6.09169	-1.1454	6.84256e-05	0.0024252	20.94	28	74.67	61.73
chr14	39837529	39837925	397	*	5.68986	4.82933	6.22517	-1.10295	6.85092e-05	0.0024257	33.73	23.13	77.47	72.15
chr11	67029101	67029427	327	*	5.49817	4.57644	6.05607	-1.14646	6.85113e-05	0.0024257	20.94	26.78	68.14	64.93
chr5	180644235	180644971	737	*	6.21551	6.66543	5.55813	0.944108	6.88919e-05	0.00243695	110.5	92.52	48.54	45.69
chr8	6785915	6786656	742	*	6.06494	6.53368	5.36619	0.978396	6.8901e-05	0.00243695	98.87	86.43	39.2	43.29
chr5	126872365	126872830	466	*	5.08698	3.88056	5.73467	-1.28707	6.89655e-05	0.00243745	20.94	8.52	61.6	44.89
chr14	75345021	75345401	381	*	4.8801	3.64511	5.5356	-1.30301	6.90048e-05	0.00243745	11.63	13.39	43.87	48.9
chr13	28498223	28498531	309	*	4.16172	4.91914	2.46992	1.41558	6.90231e-05	0.00243745	33.73	26.78	4.67	6.41
chr7	106376943	106377402	460	*	6.33929	5.6938	6.78367	-0.930095	6.9388e-05	0.00244636	51.18	52.35	118.54	101.81
chr10	32151092	32151690	599	*	5.79347	4.98101	6.31008	-1.07012	6.93902e-05	0.00244636	29.08	34.09	84.94	73.75
chr3	74425380	74425869	490	*	5.72693	4.8964	6.25067	-1.08361	6.93928e-05	0.00244636	27.91	31.65	79.34	72.95
chr10	75886842	75887203	362	*	4.92523	3.71365	5.57435	-1.29287	6.94199e-05	0.00244636	11.63	14.61	50.4	44.89
chr19	51519986	51520466	481	*	7.17243	7.5146	6.72302	0.725041	6.94882e-05	0.00244749	197.73	167.99	111.07	100.21
chr15	91814802	91815170	369	*	5.87209	5.087	6.37766	-1.04991	6.96851e-05	0.00245315	30.24	37.74	87.74	78.56
chr18	56328685	56329170	486	*	4.77005	3.43207	5.45211	-1.33877	6.97361e-05	0.00245367	6.98	14.61	46.67	40.88
chr13	28542606	28543183	578	*	4.7692	5.41933	3.55392	1.29604	6.9872e-05	0.00245676	44.2	41.39	13.07	10.42
chr14	106610068	106610480	413	*	6.71231	7.10553	6.17002	0.831398	6.98966e-05	0.00245676	150.04	125.38	77.47	66.54
chr2	33495643	33496015	373	*	5.57584	4.68131	6.12385	-1.12791	6.99894e-05	0.00245875	22.1	29.22	73.74	65.74
chr1	156771076	156771443	368	*	5.2067	4.15374	5.8089	-1.21916	7.00653e-05	0.00246014	19.77	15.83	56	56.12
chr3	151008465	151008886	422	*	5.31808	4.29264	5.91142	-1.20313	7.02866e-05	0.00246663	20.94	18.26	69.07	51.31
chr1	10161864	10162375	512	*	4.75694	3.42844	5.43664	-1.33444	7.06311e-05	0.00247743	8.14	13.39	45.74	40.88
chr2	73496002	73496773	772	*	6.79294	7.17347	6.27461	0.801328	7.06941e-05	0.00247836	152.37	136.34	74.67	80.17
chr10	88443955	88444344	390	*	6.60537	7.00521	6.05034	0.840656	7.08628e-05	0.00248299	129.11	127.82	64.4	68.14
chr3	52832886	52833502	617	*	6.67646	7.07358	6.12669	0.836894	7.09274e-05	0.00248396	148.88	120.52	70	69.74
chr12	110480868	110481465	598	*	6.96064	6.4629	7.33001	-0.779184	7.09956e-05	0.00248469	80.26	96.17	167.08	154.72
chr10	12749587	12750051	465	*	6.07847	5.35737	6.55704	-0.995929	7.10216e-05	0.00248469	43.04	38.95	101.74	86.58
chr2	74875075	74875659	585	*	6.10909	6.57704	5.41211	0.977099	7.10974e-05	0.00248606	108.17	82.78	41.07	44.09
chr12	91571799	91572217	419	*	5.47862	4.53073	6.04579	-1.15781	7.13477e-05	0.00249352	26.75	19.48	72.8	59.32
chr10	5136809	5137222	414	*	6.0038	5.27208	6.48697	-1.00622	7.18659e-05	0.00251034	39.55	37.74	89.61	89.79
chr3	30975626	30976082	457	*	5.99234	5.24918	6.48042	-1.01424	7.19665e-05	0.00251255	39.55	36.52	95.21	83.37
chr2	223846697	223847098	402	*	5.6582	4.80652	6.19013	-1.09878	7.21022e-05	0.002516	26.75	29.22	69.07	76.96
chr17	43094226	43094553	328	*	4.83851	3.57316	5.50208	-1.31164	7.24092e-05	0.00252541	11.63	12.17	40.14	50.5
chr6	141931961	141932343	383	*	4.9586	3.77336	5.60038	-1.27891	7.25927e-05	0.0025305	13.96	13.39	51.34	45.69
chr3	197874809	197875165	357	*	3.87448	4.70017	1.73915	1.43997	7.26486e-05	0.00253115	33.73	18.26	1.87	4.81
chr7	54731984	54732674	691	*	6.26878	6.72364	5.60071	0.94674	7.28198e-05	0.00253581	113.99	97.39	40.14	56.92
chr10	108160811	108161318	508	*	5.65601	4.80232	6.18871	-1.09764	7.29533e-05	0.00253915	30.24	25.56	73.74	72.15
chr12	105270864	105271293	430	*	6.02541	5.29463	6.50818	-1.00401	7.3267e-05	0.00254774	39.55	38.95	97.07	84.98
chr1	100194213	100194801	589	*	5.7282	4.89771	6.25192	-1.08226	7.32755e-05	0.00254774	26.75	32.87	80.27	72.15
chr20	40039829	40040377	549	*	5.41507	4.4598	5.9848	-1.16289	7.33211e-05	0.00254802	22.1	21.91	68.14	58.52
chr1	193377925	193378235	311	*	4.17424	2.243	4.9715	-1.4333	7.37307e-05	0.00256094	5.82	3.65	24.27	38.48
chr13	41495445	41496065	621	*	6.4148	5.78437	6.85205	-0.914606	7.38641e-05	0.00256426	63.97	46.26	114.81	116.24
chr8	130253364	130253766	403	*	5.10716	4.00734	5.72392	-1.24064	7.3936e-05	0.00256474	15.12	17.04	56	49.7
chr8	92093810	92094267	458	*	5.36935	4.37958	5.95089	-1.182	7.39538e-05	0.00256474	20.94	20.69	70	53.71
chr14	74945692	74946131	440	*	6.07079	5.33192	6.55704	-1.00848	7.41246e-05	0.00256935	47.69	32.87	101.74	86.58
chr2	85875665	85876210	546	*	6.44511	5.80092	6.88887	-0.925337	7.44362e-05	0.00257883	62.81	48.69	134.41	102.61
chr7	139475552	139476032	481	*	6.37312	5.74235	6.81052	-0.915131	7.45493e-05	0.00258081	53.5	53.56	119.47	105.02
chr7	72756474	72757087	614	*	6.18373	5.49829	6.6465	-0.967945	7.45914e-05	0.00258081	45.36	45.04	90.54	109.83
chr11	12398915	12399898	984	*	7.13003	7.48528	6.65768	0.75389	7.46077e-05	0.00258081	198.89	159.47	112.94	88.98
chr8	8800034	8800512	479	*	5.41267	4.45446	5.98343	-1.16372	7.50696e-05	0.00259546	25.59	18.26	61.6	64.93
chr5	178266382	178266709	328	*	5.31356	5.87893	4.37079	1.15537	7.53393e-05	0.00260346	60.48	57.21	20.53	20.84
chr1	63529073	63529381	309	*	4.46059	5.16031	3.04866	1.35526	7.54729e-05	0.00260674	32.57	38.95	9.33	7.21
chr22	22301465	22302360	896	*	6.51001	5.9039	6.93551	-0.89188	7.57332e-05	0.0026144	68.62	51.13	115.74	129.07
chr7	30101407	30101860	454	*	5.96143	5.19906	6.45762	-1.02736	7.598e-05	0.00262056	43.04	30.43	92.41	83.37
chr2	113642464	113642930	467	*	6.77897	7.17549	6.23035	0.83541	7.5989e-05	0.00262056	169.82	119.3	75.6	74.55
chr4	657450	657876	427	*	4.89621	5.53832	3.70978	1.27178	7.62651e-05	0.00262874	43.04	49.91	9.33	16.83
chr12	75919037	75919419	383	*	4.92269	3.62624	5.59432	-1.31469	7.63131e-05	0.00262905	18.61	6.09	54.14	42.49
chr9	114854148	114854574	427	*	4.54045	3.05389	5.2569	-1.37004	7.65036e-05	0.00263428	9.3	7.3	42	34.47
chr1	61545623	61546025	403	*	4.8774	3.64824	5.53132	-1.29468	7.68124e-05	0.00264357	10.47	14.61	47.6	44.89
chr1	221163728	221164059	332	*	4.9284	3.69867	5.58247	-1.29185	7.68536e-05	0.00264364	17.45	8.52	48.54	47.3
chr14	75270892	75271295	404	*	5.23198	4.20437	5.82604	-1.2031	7.72263e-05	0.00265511	18.61	18.26	54.14	59.32
chrX	12465520	12465832	313	*	4.06963	2.05389	4.87922	-1.43147	7.73091e-05	0.00265661	4.65	3.65	30.8	28.06
chr22	43386069	43386573	505	*	5.87023	5.07777	6.3788	-1.04992	7.74909e-05	0.00266151	39.55	28	88.67	77.76
chr2	201173456	201173905	450	*	4.53105	3.05859	5.24442	-1.36701	7.75431e-05	0.00266195	8.14	8.52	37.34	38.48
chr12	53109182	53109591	410	*	4.41605	5.13554	2.91538	1.3683	7.77237e-05	0.00266679	32.57	37.74	4.67	10.42
chr6	108489560	108490222	663	*	6.15742	6.61337	5.48697	0.952844	7.77891e-05	0.00266769	108.17	87.65	44.8	44.89
chr2	192435864	192436150	287	*	4.73973	3.41384	5.41879	-1.32507	7.81072e-05	0.00267724	12.79	8.52	43.87	41.69
chr6	101105560	101105998	439	*	5.64051	4.75254	6.1861	-1.12244	7.81929e-05	0.00267882	18.61	35.3	71.87	73.75
chr21	43757926	43758499	574	*	6.3157	6.76352	5.66285	0.931605	7.85362e-05	0.00268922	117.48	99.82	42	59.32
chr12	79949363	79949779	417	*	5.13797	4.05624	5.74918	-1.228	7.88095e-05	0.00269721	17.45	15.83	57.87	49.7
chr11	1897500	1898258	759	*	7.32089	7.64316	6.90529	0.677929	7.89887e-05	0.00270118	197.73	202.08	113.87	125.86
chr1	179807318	179807880	563	*	5.03258	3.8885	5.66253	-1.25604	7.90053e-05	0.00270118	17.45	12.17	53.2	48.1
chr10	133959716	133959953	238	*	4.37629	5.10126	2.84986	1.37489	7.9205e-05	0.0027065	41.87	26.78	5.6	8.82
chr1	86360320	86360722	403	*	6.01866	5.29164	6.49981	-0.999548	7.92408e-05	0.0027065	43.04	35.3	89.61	91.39
chr20	47940231	47940563	333	*	5.06662	3.9542	5.68719	-1.24468	7.93682e-05	0.00270848	13.96	17.04	48.54	54.51
chr3	33758290	33758621	332	*	4.6889	3.33289	5.37537	-1.33343	7.94162e-05	0.00270848	11.63	8.52	42.94	40.08
chr8	144296368	144296752	385	*	3.98505	4.76907	2.13865	1.42167	7.94187e-05	0.00270848	31.4	23.13	5.6	3.21
chr16	57456274	57456625	352	*	6.24571	5.59068	6.69455	-0.937745	7.95959e-05	0.00271315	47.69	48.69	104.54	102.61
chr2	16706571	16706952	382	*	5.10767	5.70618	4.06627	1.20782	7.96546e-05	0.00271379	58.16	46.26	15.87	17.64
chr7	101448186	101448737	552	*	5.15496	5.74162	4.14986	1.19049	7.98155e-05	0.00271473	54.67	52.35	18.67	16.83
chr1	156326612	156327213	602	*	7.61922	7.91212	7.2513	0.619559	7.98266e-05	0.00271473	241.93	239.81	159.61	145.1
chr4	55837422	55838219	798	*	7.28913	6.85468	7.62258	-0.701332	7.98891e-05	0.00271473	126.78	104.69	202.55	191.6
chr5	72514420	72514738	319	*	5.91513	5.15374	6.4109	-1.02643	7.99421e-05	0.00271473	39.55	31.65	86.81	83.37
chr16	25138086	25138531	446	*	6.41478	5.80512	6.842	-0.89504	7.9943e-05	0.00271473	55.83	56	114.81	114.64
chr6	30883260	30883683	424	*	6.03614	5.3129	6.51565	-0.995739	7.99478e-05	0.00271473	44.2	35.3	92.41	90.59
chr14	60099084	60099502	419	*	6.48817	6.90147	5.90668	0.870561	7.99631e-05	0.00271473	119.8	119.3	66.27	53.71
chr6	6494965	6495363	399	*	4.72951	5.39402	3.46058	1.31102	8.00421e-05	0.00271605	50.01	34.09	14	8.02
chr10	25263872	25264330	459	*	4.58332	3.07724	5.30398	-1.37347	8.03897e-05	0.00272648	3.49	13.39	42.94	36.07
chr11	19757108	19757445	338	*	4.63891	3.25123	5.33296	-1.34233	8.04757e-05	0.00272803	9.3	9.74	42.94	37.68
chr11	64257175	64257862	688	*	7.49078	7.79654	7.10228	0.647565	8.07823e-05	0.00273655	227.97	216.68	146.54	128.27
chr19	50762152	50762585	434	*	5.80067	6.30577	5.01673	1.04048	8.08077e-05	0.00273655	79.09	79.13	27.07	37.68
[truncated: 65,697 more rows]

## Sheet: HCMV_vs_UI_deseq2_H3K27ac
seqnames	start	end	width	strand	Conc	Conc_HCMV	Conc_UI	Log2FoldChange	p.value	FDR	H3K27ac_HCMV_Rep1	H3K27ac_HCMV_Rep2	H3K27ac_UI_Rep1	H3K27ac_UI_Rep2
chr2	47052536	47055625	3090	*	9.29029	7.73126	10.022	-2.27507	4.2742e-103	5.54735e-98	221.45	203.53	1023.82	1055.67
chr11	1568065	1570948	2884	*	9.09474	9.83341	7.50123	2.31802	5.43766e-94	3.52869e-89	897.08	927.57	197.97	164.38
chr3	71802447	71804275	1829	*	8.4005	9.26953	5.87405	3.34241	4.33009e-89	1.8733e-84	579.26	655.08	53.37	63.92
chr6	169471495	169473256	1762	*	8.37367	5.86868	9.24064	-3.31608	4.12432e-84	1.33821e-79	64.59	52.27	601.68	608.19
chr17	72426478	72429037	2560	*	8.54241	9.31469	6.76661	2.52404	2.42617e-75	5.66133e-71	654.1	619.49	115.48	102.28
chr1	145113493	145116177	2685	*	9.15017	7.85255	9.8221	-1.95532	2.61721e-75	5.66133e-71	240.93	221.33	889.9	920.51
chr6	161393464	161395386	1923	*	8.29949	6.10847	9.13218	-2.98361	6.15641e-74	1.14146e-69	64.59	73.4	556.07	566.19
chr8	11371665	11373335	1671	*	8.50372	6.65905	9.28745	-2.60141	5.36385e-73	8.70198e-69	95.35	106.77	612.35	637.42
chr1	17018746	17020880	2135	*	8.15144	8.99988	5.8255	3.11938	2.87416e-72	4.14476e-68	490.06	533.85	49.49	63.92
chr1	198462371	198464313	1943	*	8.32939	6.24083	9.14896	-2.874	1.34734e-71	1.74867e-67	65.62	85.64	561.89	573.49
chr7	22611228	22612588	1361	*	8.08446	5.52214	8.95685	-3.37102	7.97942e-70	9.41477e-66	44.09	47.82	515.31	478.52
chr2	233350250	233352913	2664	*	8.02897	8.89199	5.56435	3.26265	2.25322e-69	2.43698e-65	455.21	494.93	40.76	53.88
chr19	10117825	10119568	1744	*	8.65806	7.06542	9.39655	-2.31255	3.22601e-68	3.22072e-64	119.95	147.92	666.7	681.25
chr8	144032410	144033553	1144	*	7.98963	5.22348	8.87949	-3.57605	9.55006e-68	8.85338e-64	36.91	37.81	487.17	454.78
chr17	29864	31915	2052	*	8.06935	8.92018	5.72167	3.14343	3.01002e-67	2.60441e-63	443.93	524.96	55.32	50.23
chr7	33846365	33848656	2292	*	8.10189	5.78612	8.9492	-3.10316	1.7322e-66	1.37989e-62	62.54	47.82	488.14	500.44
chr15	52385919	52387601	1683	*	8.41829	6.65109	9.18909	-2.51069	1.80743e-66	1.37989e-62	95.35	105.66	578.39	589.02
chr14	104582640	104584291	1652	*	7.79745	8.69158	4.97635	3.62629	4.92867e-65	3.55376e-61	413.17	413.74	30.08	32.88
chr11	74383063	74385373	2311	*	8.73925	7.29826	9.44562	-2.12879	1.76338e-64	1.20454e-60	156.86	157.93	667.67	726.91
chr6	17031596	17034205	2610	*	8.21669	6.27214	9.01595	-2.70459	1.1285e-63	7.32323e-60	78.94	75.63	523.07	512.31
chr11	126859903	126861931	2029	*	8.56225	6.99945	9.29475	-2.27522	1.81038e-63	1.11887e-59	116.88	139.02	626.91	629.2
chr17	38708464	38709965	1502	*	8.43036	6.76773	9.18237	-2.38884	3.36184e-63	1.98329e-59	105.6	112.33	579.36	582.63
chr14	69013796	69015920	2125	*	9.06619	7.87451	9.70977	-1.82021	4.44903e-63	2.51055e-59	249.13	220.21	851.08	823.71
chr16	84865824	84868165	2342	*	8.87501	7.58995	9.54372	-1.93894	4.95129e-63	2.67755e-59	190.69	194.63	752.1	740.61
chr8	144033808	144035100	1293	*	8.01993	5.73268	8.86402	-3.072	5.68015e-63	2.94884e-59	57.41	48.94	471.64	460.26
chr3	13460744	13462262	1519	*	7.71721	8.61548	4.84067	3.67695	5.34555e-62	2.6684e-58	389.59	394.83	27.17	30.14
chr3	132756452	132757998	1547	*	7.84807	8.71576	5.33571	3.30685	5.62694e-62	2.70483e-58	392.67	448.22	37.85	42.92
chr21	36074175	36076196	2022	*	8.30481	6.54863	9.07371	-2.48946	5.98147e-60	2.77256e-56	100.47	86.75	558.98	518.7
chr18	46147684	46149831	2148	*	8.69771	7.33925	9.38477	-2.02906	9.40808e-60	4.2105e-56	154.81	169.05	666.7	670.29
chr19	44143215	44145010	1796	*	8.36553	9.11013	6.7418	2.33825	1.64383e-59	7.11158e-56	528	577.23	98.99	115.06
chr3	134180451	134182211	1761	*	8.31951	6.60045	9.08187	-2.44902	4.84565e-59	2.02872e-55	98.42	95.65	569.65	514.13
chr22	24455942	24458134	2193	*	8.21997	6.44209	8.99261	-2.51667	8.40151e-59	3.40752e-55	87.15	86.75	504.63	514.13
chr2	175651366	175654001	2636	*	8.82796	7.58447	9.48574	-1.88567	1.29046e-58	5.07529e-55	194.8	189.07	715.22	718.69
chr16	55521052	55522679	1628	*	8.22523	6.43935	8.99922	-2.52961	2.23276e-58	8.28853e-55	77.92	95.65	506.57	516.87
chr2	109933681	109936325	2645	*	8.88577	7.63756	9.54481	-1.89523	2.23519e-58	8.28853e-55	182.49	215.77	724.93	768.92
chr21	46879075	46880581	1507	*	8.36659	6.75351	9.10911	-2.32913	2.36958e-58	8.54281e-55	104.57	111.22	563.83	540.62
chr14	101033296	101035855	2560	*	8.40417	9.13636	6.84283	2.26656	1.29568e-57	4.54491e-54	524.92	600.59	114.51	115.06
chr19	1467696	1470689	2994	*	8.76808	9.43432	7.49256	1.92403	1.71904e-57	5.87129e-54	654.1	729.6	176.62	183.55
chr6	167009301	167010976	1676	*	7.91857	5.68303	8.75664	-3.00726	7.6819e-57	2.55644e-53	60.49	42.26	437.67	427.38
chr12	96031751	96032775	1025	*	7.83487	5.45915	8.68872	-3.16807	8.10724e-57	2.63053e-53	37.93	50.05	413.41	411.86
chr10	47057578	47059342	1765	*	8.73562	7.46986	9.3993	-1.91383	2.27997e-56	7.21732e-53	173.27	181.29	679.31	671.21
chr5	10076352	10078398	2047	*	7.8512	5.55264	8.69657	-3.08077	4.3111e-56	1.3322e-52	47.16	46.71	396.91	432.86
chr2	220214840	220216820	1981	*	7.8755	5.66882	8.71011	-2.98713	1.73105e-55	5.22485e-52	46.14	55.61	405.65	431.95
chr8	11373764	11375283	1520	*	8.23275	6.55664	8.98727	-2.40131	2.49313e-55	7.34125e-52	88.17	100.1	518.22	496.78
chr3	32857919	32860501	2583	*	7.92628	8.72595	5.97897	2.70285	2.54537e-55	7.34125e-52	414.2	432.64	64.05	62.1
chr4	8474905	8476179	1275	*	8.04833	6.16197	8.8387	-2.6373	5.21015e-55	1.47002e-51	68.69	74.52	444.47	471.21
chr2	99552061	99553833	1773	*	7.85459	8.66919	5.80282	2.81326	7.28559e-55	2.01186e-51	405.99	408.18	50.46	61.18
chr5	178701672	178704300	2629	*	9.69551	8.90357	10.2039	-1.29436	7.90617e-55	2.13775e-51	482.89	474.91	1192.68	1166.16
chr4	48491963	48493633	1671	*	8.40089	9.10426	6.97308	2.10915	1.40089e-54	3.71057e-51	554.65	546.09	126.16	125.11
chr5	168789	170193	1405	*	8.36497	6.85131	9.08725	-2.21232	1.86979e-54	4.85349e-51	109.7	121.23	545.39	542.44
chr1	156074158	156077207	3050	*	9.80391	9.03631	10.3023	-1.2593	2.03877e-54	5.18835e-51	548.5	501.6	1275.17	1250.18
chr18	395142	397148	2007	*	8.14553	6.35579	8.92018	-2.52347	2.99738e-54	7.48116e-51	88.17	75.63	510.46	458.43
chr2	158881431	158883180	1750	*	7.88286	5.76138	8.70676	-2.88759	4.52715e-54	1.10861e-50	58.44	50.05	403.71	431.95
chr7	155249934	155251994	2061	*	7.67412	8.5218	5.35497	3.09848	1.11248e-53	2.67381e-50	354.73	380.37	40.76	41.09
chr17	2135751	2137388	1638	*	8.23261	6.61497	8.97602	-2.32974	1.73401e-53	4.09185e-50	101.5	94.54	492.99	514.13
chr4	26015889	26018347	2459	*	8.199	6.54152	8.95004	-2.3799	2.1482e-53	4.97872e-50	85.09	101.21	497.84	491.3
chr18	76738574	76741152	2579	*	7.46782	8.39691	4.08589	4.15006	2.42477e-53	5.52111e-50	326.03	348.12	18.44	15.52
chr20	55401274	55403868	2595	*	8.58688	7.26743	9.26434	-1.98024	4.08348e-53	9.13764e-50	143.53	164.61	616.24	613.67
chr12	12110927	12112805	1879	*	7.94409	5.93164	8.75322	-2.76635	4.38793e-53	9.65247e-50	68.69	53.39	449.32	413.68
chr7	98245922	98247786	1865	*	7.46509	8.36973	4.4985	3.75117	6.57503e-53	1.42226e-49	330.13	331.43	23.29	21.92
chr15	26074712	26077589	2878	*	9.02702	7.98556	9.62554	-1.62874	1.6037e-52	3.41211e-49	252.21	254.69	804.5	775.31
chr19	39055415	39056618	1204	*	7.64359	8.48956	5.3398	3.08208	1.70253e-52	3.56396e-49	349.61	369.25	41.73	39.27
chr11	12098255	12099682	1428	*	8.35593	6.82744	9.08133	-2.22222	1.96639e-52	4.05098e-49	128.15	98.99	531.81	551.58
chr7	47689904	47691197	1294	*	7.75499	5.46027	8.59993	-3.06546	2.93136e-52	5.94458e-49	50.24	37.81	398.85	377.15
chr20	62679376	62681402	2027	*	7.91034	8.69276	6.07371	2.5789	7.33211e-52	1.46402e-48	418.3	409.29	69.87	64.84
chr15	89921020	89922866	1847	*	7.54696	8.40817	5.10035	3.22682	2.15735e-51	4.24236e-48	342.43	337	33	35.62
chr7	41188597	41189893	1297	*	7.69998	5.39594	8.54598	-3.07903	2.72801e-51	5.28448e-48	43.06	41.15	380.42	367.11
chr17	81101550	81103381	1832	*	8.51048	7.15469	9.1969	-2.02463	2.86652e-51	5.47113e-48	128.15	156.82	592.94	580.8
chr17	66373311	66374934	1624	*	8.63325	7.37427	9.29514	-1.90577	3.38531e-51	6.36768e-48	152.76	179.06	632.73	623.72
chr21	43459382	43460650	1269	*	8.62933	7.35969	9.29403	-1.91826	3.52953e-51	6.5441e-48	152.76	175.73	647.29	608.19
chr8	97349803	97351470	1668	*	8.57734	7.28217	9.24865	-1.95007	3.81313e-51	6.97034e-48	145.58	165.72	591.97	624.63
chr3	141174004	141176295	2292	*	8.91513	7.83701	9.52522	-1.67519	4.50556e-51	8.1217e-48	233.75	223.55	723.95	749.74
chr11	111605231	111606561	1331	*	8.65171	7.42963	9.3037	-1.85798	7.4779e-51	1.3295e-47	170.19	174.61	620.12	643.81
chr15	92936619	92938574	1956	*	7.39196	8.30454	4.30376	3.86088	1.17822e-50	2.06646e-47	307.57	324.76	19.41	20.09
chr1	204653519	204655112	1594	*	7.6855	8.51781	5.49758	2.95626	1.74307e-50	3.01637e-47	339.35	393.72	45.61	44.75
chr1	154473935	154475597	1663	*	7.78967	8.59556	5.79989	2.74748	1.78847e-50	3.05421e-47	372.16	401.5	62.11	49.31
chr6	151177271	151178724	1454	*	7.77771	5.68206	8.59823	-2.86082	3.23961e-50	5.4605e-47	48.19	54.5	398.85	376.24
chr1	21587784	21590538	2755	*	9.33863	8.46688	9.87818	-1.4041	3.3389e-50	5.55571e-47	350.63	357.02	929.69	952.47
chr8	21987428	21989117	1690	*	8.13971	8.87403	6.56785	2.27896	5.45596e-50	8.96345e-47	475.71	462.67	104.81	84.93
chr3	8499690	8501410	1721	*	7.98545	6.17382	8.76377	-2.54284	1.03704e-49	1.68242e-46	80.99	63.4	448.35	420.99
chr13	113763995	113765545	1551	*	7.85761	8.63469	6.0534	2.54037	3.09912e-49	4.96574e-46	396.77	398.17	68.9	63.92
chr6	166073906	166076984	3079	*	7.73294	8.53481	5.77076	2.71355	3.69976e-49	5.85587e-46	368.06	373.7	55.32	53.88
chr11	65058642	65060301	1660	*	8.45423	7.13805	9.13087	-1.97209	4.3268e-49	6.76581e-46	140.46	141.25	569.65	551.58
chr5	37738530	37741333	2804	*	7.81478	5.84009	8.61848	-2.73024	4.4983e-49	6.95025e-46	52.29	62.28	398.85	387.2
chr6	105388176	105389462	1287	*	7.68207	8.51023	5.52735	2.91904	4.88509e-49	7.45907e-46	332.18	397.05	46.58	45.66
chr7	69062329	69065357	3029	*	8.73585	9.37695	7.553	1.80498	1.22558e-48	1.84959e-45	621.29	708.47	174.68	200.91
chr5	149755743	149757510	1768	*	7.92847	6.14807	8.70153	-2.51165	1.69416e-48	2.52735e-45	71.77	70.07	414.38	418.25
chr8	142427291	142428638	1348	*	7.39131	8.27117	4.74566	3.42428	2.12837e-48	3.13903e-45	307.57	310.3	27.17	26.48
chr18	55094658	55096374	1717	*	7.38118	8.26458	4.6941	3.46514	2.4885e-48	3.62893e-45	301.42	313.64	26.2	25.57
chr20	25289238	25291064	1827	*	9.10381	8.14484	9.67483	-1.52123	2.6114e-48	3.76584e-45	275.79	290.28	790.92	843.8
chr10	105435987	105438563	2577	*	9.36063	8.5127	9.89112	-1.37145	2.67771e-48	3.81903e-45	356.78	373.7	969.48	929.64
chr1	144940132	144942775	2644	*	8.79433	7.66924	9.41868	-1.73137	8.44027e-48	1.19069e-44	222.48	184.62	694.84	673.95
chr15	89594195	89596815	2621	*	7.82903	5.93574	8.62047	-2.63399	9.47977e-48	1.32296e-44	64.59	57.83	401.77	385.37
chr2	238090829	238091849	1021	*	7.89181	6.09588	8.66751	-2.53019	1.1922e-47	1.64609e-44	65.62	71.18	410.5	402.72
chr2	235858941	235860474	1534	*	8.8641	7.82131	9.46305	-1.62927	1.23649e-47	1.68926e-44	226.58	225.78	707.46	704.08
chr6	166720342	166722314	1973	*	8.17282	8.88548	6.7036	2.15163	5.34073e-47	7.22039e-44	453.15	492.7	97.04	111.41
chr11	2291382	2292982	1601	*	7.31763	8.2656	3.4985	4.51978	6.50266e-47	8.70063e-44	296.29	319.2	11.65	10.96
chr10	46992220	46993814	1595	*	8.47837	9.13841	7.2264	1.89033	6.80395e-47	9.01085e-44	545.43	581.68	138.77	160.72
chr3	24186199	24188177	1979	*	7.88484	6.09935	8.65877	-2.51248	1.04366e-46	1.36821e-43	74.84	62.28	404.68	403.64
chr4	184718245	184719906	1662	*	7.61471	8.4296	5.56089	2.81313	1.05553e-46	1.36994e-43	353.71	335.88	52.4	42.01
chr5	180017080	180018976	1897	*	7.7973	8.57273	6.00293	2.52761	1.47845e-46	1.89983e-43	371.14	390.38	68.9	59.36
chr18	360969	363447	2479	*	8.2954	6.79168	9.01555	-2.18819	1.80334e-46	2.29461e-43	128.15	93.42	549.27	485.83
chr6	39247315	39249648	2334	*	7.31752	8.20648	4.56264	3.53199	1.86359e-46	2.34825e-43	286.04	304.74	27.17	20.09
chr1	109357976	109360851	2876	*	8.51946	7.23817	9.18719	-1.92486	2.31414e-46	2.88794e-43	164.04	137.91	614.29	551.58
chr3	3840313	3842886	2574	*	7.27569	8.17885	4.33059	3.70608	2.74096e-46	3.38801e-43	287.07	292.51	16.5	23.74
chr6	148828388	148830998	2611	*	8.68759	7.56315	9.31175	-1.73489	4.31768e-46	5.2866e-43	182.49	195.75	616.24	654.77
chr7	51383389	51385147	1759	*	7.37851	8.24645	4.86348	3.28491	4.80158e-46	5.82413e-43	287.07	320.31	27.17	31.05
chr14	105947377	105949416	2040	*	9.62035	8.88701	10.1042	-1.21183	5.53856e-46	6.65587e-43	467.51	479.36	1124.75	1076.67
chr2	129062936	129063914	979	*	8.41474	7.12257	9.08528	-1.93865	7.47256e-46	8.89762e-43	149.68	129.01	551.21	535.14
chr19	49575008	49576259	1252	*	7.63189	8.43228	5.67971	2.69833	1.08255e-45	1.27728e-42	351.66	339.22	50.46	52.05
chr3	67697074	67699532	2459	*	8.08264	6.55531	8.8078	-2.22302	1.32744e-45	1.55211e-42	90.22	97.87	440.58	455.69
chr7	43685648	43687657	2010	*	8.41915	7.10629	9.09494	-1.97102	1.55136e-45	1.79774e-42	120.98	154.6	535.69	557.97
chr14	37115998	37117374	1377	*	7.22013	8.14285	3.95926	4.01003	1.61152e-45	1.85092e-42	285.02	280.27	16.5	14.61
chr19	15360958	15362104	1147	*	8.26508	6.87937	8.95867	-2.05722	1.65814e-45	1.88776e-42	108.68	126.79	490.08	505
chr13	114629732	114630820	1089	*	7.82549	6.01232	8.60406	-2.54519	1.80208e-45	2.03379e-42	64.59	64.51	405.65	372.59
chr15	101631125	101633275	2151	*	8.50735	7.29044	9.15793	-1.84978	2.01978e-45	2.25984e-42	150.71	162.38	589.06	553.4
chr19	10055263	10057636	2374	*	8.68314	7.5755	9.30227	-1.71277	2.82262e-45	3.13111e-42	183.52	197.97	645.35	617.33
chr15	80798632	80800170	1539	*	7.76911	5.8646	8.56229	-2.64854	3.8519e-45	4.23667e-42	55.36	61.17	354.21	401.81
chr6	151254534	151255631	1098	*	7.36002	4.36158	8.26681	-3.74655	4.23416e-45	4.61797e-42	26.66	14.46	302.78	313.23
chr1	3438712	3440781	2070	*	8.94435	7.9699	9.5207	-1.53923	4.48328e-45	4.84893e-42	251.18	250.24	754.04	715.04
chr7	51077402	51078989	1588	*	7.85208	6.11554	8.61754	-2.45961	5.3945e-45	5.78625e-42	69.72	68.96	390.12	395.42
chr5	167626	168644	1019	*	8.409	7.15327	9.07004	-1.89579	5.61818e-45	5.97677e-42	144.56	140.14	543.45	531.49
chr11	10401346	10402781	1436	*	7.37654	3.68573	8.31957	-4.40152	5.9119e-45	6.23811e-42	11.28	14.46	304.72	334.23
chr16	70737177	70739089	1913	*	9.30371	8.47986	9.82483	-1.33667	6.38842e-45	6.68656e-42	367.03	347.01	901.55	912.29
chr13	100620387	100622134	1748	*	7.52323	8.34793	5.39566	2.89077	7.80526e-45	8.10417e-42	329.1	322.54	49.49	34.7
chr4	54341810	54343800	1991	*	8.16111	6.69579	8.87291	-2.15025	8.39282e-45	8.64507e-42	99.45	107.88	445.44	492.22
chr17	11143395	11145266	1872	*	7.20311	8.13956	3.6668	4.25608	1.13059e-44	1.1554e-41	287.07	276.94	12.62	12.78
chr5	1930543	1932062	1520	*	7.26464	8.14785	4.57993	3.45066	1.24726e-44	1.26467e-41	288.09	279.16	21.35	26.48
chr2	105990508	105991635	1128	*	7.79166	5.97852	8.57023	-2.54593	1.39937e-44	1.40791e-41	60.49	65.62	394	366.2
chr7	51075612	51077079	1468	*	7.61549	5.56567	8.42983	-2.7997	1.55425e-44	1.5517e-41	50.24	44.49	344.51	345.19
chr4	77701910	77703452	1543	*	7.65231	5.61204	8.46533	-2.79931	1.62435e-44	1.60931e-41	39.98	57.83	357.13	349.76
chr2	238187655	238188827	1173	*	8.34109	7.03228	9.01587	-1.96188	1.97748e-44	1.93869e-41	126.1	135.69	537.63	497.7
chr1	26371950	26373557	1608	*	7.42296	8.25993	5.19669	2.98806	1.98668e-44	1.93869e-41	311.67	301.41	35.91	37.44
chr17	39071910	39073067	1158	*	7.43731	5.02373	8.29514	-3.18132	2.17874e-44	2.11024e-41	32.81	32.25	308.6	319.62
chr8	143762009	143764367	2359	*	9.17025	8.30315	9.70804	-1.39672	2.56383e-44	2.46483e-41	314.75	316.98	817.12	855.67
chr19	6232985	6234765	1781	*	8.55971	7.39013	9.19704	-1.79015	2.96997e-44	2.83429e-41	161.99	173.5	610.41	563.45
chr7	29651753	29653297	1545	*	7.41666	4.83813	8.29055	-3.35936	3.50844e-44	3.32372e-41	20.5	36.7	321.22	305.01
chr5	178752080	178753245	1166	*	8.07062	6.57937	8.78809	-2.17962	4.12548e-44	3.87995e-41	92.27	98.99	435.73	448.38
chr10	17027433	17029378	1946	*	8.37581	7.12176	9.0364	-1.8942	4.64323e-44	4.33548e-41	138.41	140.14	525.98	524.18
chr8	95253076	95255625	2550	*	8.24186	6.89388	8.92637	-2.00776	4.77371e-44	4.42547e-41	119.95	117.89	488.14	484.91
chr15	83315208	83317495	2288	*	8.32472	9.00292	7.00227	1.97468	4.84668e-44	4.46125e-41	477.76	548.31	120.34	136.07
chr17	2658442	2659912	1471	*	7.63448	8.42355	5.75635	2.61439	5.14562e-44	4.70306e-41	335.25	351.45	52.4	55.71
chr3	123451622	123453046	1425	*	8.12945	6.65283	8.84374	-2.15847	5.50043e-44	4.9922e-41	105.6	95.65	483.28	435.6
chr20	43123306	43124446	1141	*	7.77781	5.96975	8.55553	-2.54194	7.53139e-44	6.78803e-41	56.39	68.96	387.21	365.28
chr8	49504514	49505514	1001	*	7.7114	5.8335	8.50043	-2.61382	8.16141e-44	7.30514e-41	58.44	55.61	373.62	350.67
chr4	159234488	159235844	1357	*	7.82337	6.08133	8.5898	-2.46452	1.11849e-43	9.94288e-41	68.69	66.73	368.77	401.81
chr4	160321918	160323238	1321	*	7.95093	6.24131	8.71158	-2.42086	1.19775e-43	1.0575e-40	91.25	60.06	404.68	433.77
chr17	70460495	70462573	2079	*	8.11783	6.60947	8.83898	-2.20229	1.46246e-43	1.28248e-40	84.07	111.22	478.43	437.43
chr4	77675262	77676614	1353	*	8.12892	6.68912	8.83501	-2.11466	1.50769e-43	1.30687e-40	110.73	95.65	451.26	462.08
chr9	130445063	130446816	1754	*	7.84121	6.07056	8.6126	-2.50382	1.5104e-43	1.30687e-40	54.34	80.08	391.09	391.77
chr3	127797871	127799058	1188	*	7.62014	5.62554	8.42672	-2.73624	4.50303e-43	3.87043e-40	55.36	43.38	334.8	353.41
chr7	134877479	134879778	2300	*	8.47919	7.30565	9.11766	-1.79266	4.9092e-43	4.19178e-40	164.04	152.37	551.21	559.8
chr1	6514240	6516089	1850	*	7.54049	8.35664	5.47742	2.8206	7.05613e-43	5.98558e-40	321.92	333.66	55.32	33.79
chr10	127942081	127943303	1223	*	7.6744	5.74652	8.47115	-2.66436	7.27062e-43	6.12748e-40	58.44	48.94	374.59	335.15
chr17	55740676	55741840	1165	*	7.61312	5.64797	8.41543	-2.70834	8.35011e-43	6.99184e-40	50.24	50.05	352.27	330.58
chr9	140917174	140918710	1537	*	7.13255	8.06574	3.6668	4.18305	1.08575e-42	9.03313e-40	277.84	258.03	12.62	12.78
chr10	17067718	17068947	1230	*	7.81577	6.12005	8.5739	-2.41438	1.11063e-42	9.18122e-40	64.59	74.52	380.42	381.72
chr8	118967801	118970199	2399	*	8.56504	7.45515	9.18485	-1.71344	1.31717e-42	1.07951e-39	176.34	174.61	582.27	581.71
chr1	4714221	4716427	2207	*	7.47372	8.29124	5.40051	2.82103	1.3225e-42	1.07951e-39	297.32	329.21	38.82	45.66
chr2	47796739	47798504	1766	*	7.29375	8.16267	4.76849	3.28757	1.47454e-42	1.1961e-39	258.36	314.75	26.2	28.31
chr1	170277770	170280229	2460	*	8.14325	6.74885	8.83888	-2.06118	1.98169e-42	1.5975e-39	112.78	102.32	446.41	469.39
chr12	45666770	45668766	1997	*	7.92253	6.34071	8.65887	-2.28166	2.22306e-42	1.78101e-39	82.02	80.08	390.12	418.25
chr11	74741976	74743235	1260	*	7.58547	5.61689	8.38828	-2.71163	2.35711e-42	1.87682e-39	49.21	48.94	337.72	332.41
chr2	241758016	241760463	2448	*	7.36787	8.21275	5.07368	3.04844	2.38871e-42	1.89039e-39	281.94	311.42	27.17	40.18
chr17	77788619	77789717	1099	*	7.48989	8.2981	5.48385	2.75248	3.01788e-42	2.37383e-39	301.42	328.1	46.58	42.92
chr11	82443490	82445056	1567	*	7.6981	8.46199	5.97046	2.44886	3.22542e-42	2.52179e-39	352.68	352.57	66.96	58.45
chr11	69087290	69089785	2496	*	8.83837	7.86326	9.41494	-1.5409	4.15154e-42	3.22645e-39	226.58	239.12	665.73	699.52
chr2	239427200	239428446	1247	*	7.77924	6.05102	8.54322	-2.44924	4.29242e-42	3.31607e-39	62.54	70.07	387.21	358.89
chr5	52715055	52716383	1329	*	7.52173	5.4688	8.33649	-2.80194	4.59893e-42	3.53184e-39	44.09	44.49	324.13	322.36
chr12	130645365	130648139	2775	*	7.2814	8.15882	4.66354	3.37674	5.06207e-42	3.86465e-39	250.16	321.42	23.29	27.4
chr2	69468789	69469814	1026	*	7.40184	5.10137	8.24743	-3.06631	6.32329e-42	4.79931e-39	29.73	38.93	302.78	305.01
chr1	236081292	236082687	1396	*	7.87309	6.27214	8.61324	-2.3022	7.19439e-42	5.42871e-39	78.94	75.63	396.91	386.29
chr2	45155812	45157088	1277	*	7.28388	8.15041	4.78349	3.25641	7.80273e-42	5.85372e-39	302.44	265.82	20.38	34.7
chr4	7844605	7846455	1851	*	8.69838	7.66016	9.29586	-1.61983	8.98808e-42	6.70423e-39	213.25	191.3	627.88	629.2
chr18	47720495	47721704	1210	*	7.11125	8.01712	4.12654	3.73797	9.1473e-42	6.78401e-39	251.18	266.93	19.41	15.52
chr4	8893712	8895708	1997	*	7.155	8.10638	3.23984	4.57603	9.83727e-42	7.25426e-39	280.91	270.26	10.67	8.22
chr11	66104450	66105885	1436	*	8.5582	7.44533	9.1789	-1.71855	9.93475e-42	7.28475e-39	165.06	183.51	593.91	565.27
chr3	134179161	134179834	674	*	7.25766	4.51256	8.14584	-3.49938	1.01461e-41	7.39796e-39	25.63	20.02	283.37	283.09
chr20	31170617	31173033	2417	*	8.58104	9.19959	7.4753	1.70555	1.12924e-41	8.18774e-39	559.78	616.16	165.95	189.95
chr5	154006456	154008547	2092	*	7.73117	5.99119	8.49724	-2.46192	1.4741e-41	1.06288e-38	60.49	66.73	361.98	360.72
chr2	47108241	47109174	934	*	7.79278	6.12796	8.5452	-2.37615	1.77123e-41	1.27007e-38	68.69	71.18	373.62	373.5
chr1	162203882	162204945	1064	*	7.21343	4.17295	8.12298	-3.78032	1.93794e-41	1.38197e-38	20.5	15.57	271.73	285.83
chr4	91048562	91049816	1255	*	7.33276	8.1656	5.1406	2.94694	1.96598e-41	1.39431e-38	283.99	290.28	34.94	35.62
chr13	45477445	45479138	1694	*	7.77103	6.06569	8.53092	-2.41759	2.00623e-41	1.41512e-38	72.79	61.17	372.65	367.11
chr9	94648493	94649725	1233	*	7.57763	5.54729	8.38927	-2.77202	2.07391e-41	1.45495e-38	51.26	42.26	361.01	309.58
chr8	48522524	48524224	1701	*	7.65331	5.81714	8.43567	-2.56346	2.19167e-41	1.5293e-38	60.49	52.27	345.48	347.02
chr15	71983312	71985201	1890	*	7.89782	6.3178	8.6338	-2.2824	2.23198e-41	1.5491e-38	72.79	86.75	386.24	408.2
chr11	10919915	10921389	1475	*	8.07583	6.66512	8.77527	-2.08275	2.27171e-41	1.56829e-38	98.42	104.55	427	449.3
chr12	120805758	120807518	1761	*	7.78472	8.528	6.16777	2.31927	2.29552e-41	1.57634e-38	356.78	381.48	68.9	74.88
chr5	172167279	172169277	1999	*	8.31424	7.04761	8.97815	-1.90449	2.32669e-41	1.58934e-38	145.58	119.01	502.69	505.92
chr2	175642265	175643997	1733	*	8.63954	7.58832	9.24118	-1.63787	2.63259e-41	1.78888e-38	195.82	189.07	593.91	616.41
chr6	134910932	134912486	1555	*	7.91195	6.34458	8.64537	-2.26571	2.65339e-41	1.79362e-38	76.89	85.64	417.29	383.55
chr17	39536680	39537703	1024	*	7.88515	6.32235	8.61764	-2.2589	3.09403e-41	2.08065e-38	79.97	80.08	391.09	394.5
chr16	70771780	70772461	682	*	8.1564	6.81447	8.83942	-1.9988	3.22199e-41	2.15553e-38	112.78	112.33	467.76	448.38
chr15	58791058	58792667	1610	*	7.73315	6.01329	8.49565	-2.43761	3.41598e-41	2.27359e-38	63.56	65.62	363.92	357.98
chr1	1981079	1983035	1957	*	7.5274	8.32117	5.61902	2.64911	6.17574e-41	4.08944e-38	326.03	313.64	56.29	42.01
chr12	107712244	107714055	1812	*	7.57117	8.36095	5.68854	2.62168	6.26905e-41	4.13016e-38	325	332.55	61.14	42.01
chr3	123470601	123471418	818	*	7.50245	5.47445	8.31377	-2.77719	7.62571e-41	4.98705e-38	39.98	48.94	323.16	313.23
chr2	129293736	129294921	1186	*	7.36583	5.04628	8.21356	-3.07741	7.64656e-41	4.98705e-38	33.83	32.25	280.46	313.23
chr1	27625225	27627402	2178	*	8.41939	7.26058	9.05363	-1.77554	1.02202e-40	6.63227e-38	147.63	159.04	538.6	524.18
chr17	72449104	72451249	2146	*	7.9686	8.67039	6.54773	2.09232	1.15794e-40	7.47688e-38	411.12	403.73	91.22	95.89
chr12	54393367	54394935	1569	*	8.1222	8.79714	6.81275	1.9589	1.57925e-40	1.01469e-37	433.68	456	111.6	113.24
chr1	210069416	210070371	956	*	7.2013	4.41781	8.09254	-3.53966	1.68981e-40	1.08037e-37	20.5	22.24	275.61	270.31
chr2	239341993	239343107	1115	*	8.17643	6.86503	8.85186	-1.9598	1.98322e-40	1.26175e-37	123.03	110.11	462.9	461.17
chr2	47086268	47087201	934	*	7.75748	6.05575	8.5167	-2.4214	2.09859e-40	1.32863e-37	57.41	75.63	358.1	374.41
chr14	90096378	90097636	1259	*	7.51923	5.47415	8.33291	-2.78296	2.16196e-40	1.36211e-37	53.31	35.59	312.48	332.41
chr7	158380632	158381720	1089	*	7.14735	8.02021	4.57993	3.32227	2.5839e-40	1.62008e-37	251.18	268.04	21.35	26.48
chr3	54155254	54157104	1851	*	7.53476	8.31733	5.69728	2.56882	2.66653e-40	1.66385e-37	319.87	318.09	56.29	47.49
chr11	12096893	12097688	796	*	7.78938	6.15846	8.53536	-2.33474	2.86246e-40	1.76997e-37	72.79	70.07	380.42	361.63
chr16	89005997	89008202	2206	*	7.80429	8.54662	6.1922	2.31564	2.86387e-40	1.76997e-37	348.58	399.28	79.58	66.66
chr18	3621931	3625481	3551	*	9.57376	8.88749	10.0369	-1.14305	2.89261e-40	1.77925e-37	490.06	457.11	1049.06	1052.01
chr17	1960425	1961918	1494	*	8.74938	7.77393	9.32607	-1.54004	2.90967e-40	1.78131e-37	215.3	222.44	645.35	638.33
chr11	35103923	35105159	1237	*	8.32359	7.08179	8.98092	-1.87741	3.85159e-40	2.34688e-37	136.36	134.58	473.58	536.96
chr19	34396391	34398116	1726	*	8.04861	8.74011	6.67167	2.04322	4.08869e-40	2.47971e-37	433.68	421.52	112.57	91.32
chr15	85382710	85384705	1996	*	8.3081	8.95333	7.11053	1.82427	4.38918e-40	2.64957e-37	493.14	498.26	149.45	126.94
chr2	239593937	239595281	1345	*	7.77596	6.13493	8.52388	-2.34534	5.03031e-40	3.02254e-37	73.82	66.73	358.1	378.07
chr15	73659912	73661917	2006	*	7.39033	8.21047	5.29748	2.83496	5.53216e-40	3.30877e-37	279.89	312.53	33	45.66
chr5	9046087	9046899	813	*	7.51722	5.45742	8.33292	-2.79719	6.78106e-40	4.03713e-37	52.29	35.59	343.54	301.36
chr9	95946140	95947641	1502	*	7.43312	8.23089	5.4985	2.67216	7.82724e-40	4.6387e-37	298.34	302.52	46.58	43.83
chr8	11323143	11325265	2123	*	9.03462	8.17057	9.57126	-1.39254	8.59339e-40	5.06959e-37	273.74	302.52	775.39	746.09
chr17	2626877	2628400	1524	*	7.63005	8.41384	5.78499	2.56706	9.30336e-40	5.4636e-37	323.97	358.13	42.7	67.58
chr17	78830656	78833127	2472	*	9.32999	8.58094	9.82056	-1.23248	9.87881e-40	5.77541e-37	385.49	380.37	919.02	889.46
chr1	230248237	230250542	2306	*	8.3521	7.18075	8.98994	-1.78957	9.94315e-40	5.78696e-37	145.58	144.59	503.66	513.22
chr7	8300942	8302298	1357	*	7.60554	8.36749	5.88873	2.43134	1.14232e-39	6.6187e-37	329.1	331.43	58.23	60.27
chr22	28196593	28198605	2013	*	8.87182	9.42714	7.95726	1.45734	1.25073e-39	7.21458e-37	669.48	707.36	236.79	260.26
chr7	43732594	43735170	2577	*	7.83475	6.21675	8.57823	-2.31592	1.26105e-39	7.24193e-37	82.02	66.73	403.71	360.72
chr1	245254375	245256244	1870	*	7.83625	6.25058	8.57336	-2.2884	1.2831e-39	7.33609e-37	66.64	85.64	375.56	386.29
chr3	40086191	40087454	1264	*	7.28261	4.89272	8.13797	-3.14076	1.32977e-39	7.56961e-37	33.83	25.58	277.55	285.83
chr15	78111307	78113314	2008	*	7.63845	8.40876	5.87408	2.4889	1.39661e-39	7.91539e-37	326.03	353.68	68.9	48.4
chr17	2116400	2118546	2147	*	8.68526	7.68766	9.26941	-1.56717	1.44465e-39	8.15203e-37	213.25	199.08	612.35	621.89
chr14	73074507	73076670	2164	*	8.43657	7.3111	9.06104	-1.73131	1.49654e-39	8.4083e-37	163.01	154.6	523.07	545.18
chr5	148864491	148865694	1204	*	7.66369	5.87296	8.43851	-2.51337	1.51187e-39	8.45781e-37	60.49	56.72	322.19	371.67
chr4	151156006	151158104	2099	*	8.17194	6.83394	8.854	-1.98878	1.61767e-39	9.01083e-37	129.18	98.99	455.14	470.3
chr3	181412726	181414083	1358	*	7.09473	7.99174	4.23546	3.60655	1.67889e-39	9.3119e-37	226.58	282.5	19.41	18.26
chr19	18716647	18718446	1800	*	7.77729	8.50592	6.23327	2.23472	1.80447e-39	9.96582e-37	357.81	369.25	73.75	76.71
chr5	146932847	146935350	2504	*	8.02691	6.6412	8.72049	-2.0509	1.97543e-39	1.08638e-36	98.42	101.21	415.35	428.29
chr21	43032584	43034640	2057	*	8.32656	7.14895	8.96618	-1.79728	2.21363e-39	1.21224e-36	141.48	142.36	500.75	499.52
chr21	46712673	46715874	3202	*	9.86878	9.27229	10.2896	-1.01427	2.29064e-39	1.24544e-36	603.86	632.84	1240.23	1262.96
chr2	69423944	69424818	875	*	7.30771	5.0218	8.15165	-3.038	2.29563e-39	1.24544e-36	33.83	31.14	291.13	277.61
chr5	148784562	148786067	1506	*	8.32202	7.12796	8.96627	-1.81782	2.30305e-39	1.24544e-36	137.38	142.36	517.25	483.09
chr2	239635198	239636227	1030	*	7.44235	5.41634	8.25338	-2.76877	2.62075e-39	1.41137e-36	42.03	43.38	314.43	295.88
chr15	83620857	83621997	1141	*	7.68816	8.44	6.02647	2.36599	2.70733e-39	1.45197e-36	334.23	360.35	58.23	72.14
chr1	156083643	156086018	2376	*	9.80742	9.17495	10.2456	-1.06761	2.83376e-39	1.51352e-36	545.43	610.6	1237.32	1190.82
chr12	102927928	102929928	2001	*	8.20914	6.95335	8.8702	-1.89443	2.87972e-39	1.53176e-36	119.95	127.9	477.46	458.43
chr22	43326850	43327600	751	*	7.51935	5.61944	8.31182	-2.63427	3.2288e-39	1.71044e-36	47.16	51.16	324.13	311.4
chr17	81151106	81152365	1260	*	8.58632	7.54017	9.18634	-1.63296	3.53425e-39	1.86463e-36	174.29	197.97	587.12	578.06
chr17	74378526	74381949	3424	*	10.3637	9.87738	10.7268	-0.846748	4.05024e-39	2.12822e-36	952.45	928.68	1693.43	1695.82
chr4	190935872	190936950	1079	*	7.40341	8.20839	5.41988	2.72167	4.19549e-39	2.19565e-36	276.81	314.75	42.7	42.92
chr20	46645089	46646024	936	*	7.30383	5.01058	8.1486	-3.054	4.58969e-39	2.3923e-36	26.66	37.81	286.28	281.27
chr9	34589252	34590460	1209	*	7.27881	8.10756	5.11943	2.90617	4.77158e-39	2.47716e-36	262.46	289.17	33	36.53
chr22	19136520	19138507	1988	*	7.53643	8.31914	5.69808	2.56731	4.95445e-39	2.56184e-36	297.32	341.44	57.26	46.57
chr15	42749184	42750926	1743	*	7.81737	6.26336	8.54807	-2.24626	5.27238e-39	2.71542e-36	76.89	76.74	383.33	365.28
chr5	8843261	8845317	2057	*	7.89484	6.37767	8.61785	-2.2091	5.9625e-39	3.05871e-36	71.77	94.54	393.03	392.68
chr16	70747968	70749719	1752	*	8.76507	7.81614	9.3326	-1.50533	6.00011e-39	3.06589e-36	219.4	231.34	635.64	653.86
chr5	1444681	1446726	2046	*	7.14063	8.00424	4.67004	3.22691	6.35226e-39	3.2331e-36	239.91	273.6	27.17	23.74
chr20	644102	645235	1134	*	7.05841	7.93933	4.40051	3.4081	6.4689e-39	3.27961e-36	244.01	246.91	19.41	22.83
chr2	31569591	31570709	1119	*	7.3431	5.1523	8.17577	-2.93585	6.91007e-39	3.48964e-36	39.98	31.14	283.37	294.97
chr17	25828717	25830644	1928	*	7.55337	5.72346	8.3347	-2.5563	7.36964e-39	3.7073e-36	52.29	53.39	326.07	319.62
chr12	54367025	54369005	1981	*	8.3087	8.94083	7.15714	1.76531	7.78319e-39	3.90022e-36	489.04	493.82	148.48	136.98
chr1	7763822	7765948	2127	*	8.35151	8.97947	7.21427	1.74796	7.95671e-39	3.97183e-36	502.37	507.16	158.18	138.81
chr20	55840229	55842254	2026	*	7.19481	8.04025	4.89568	3.05617	8.27291e-39	4.11386e-36	257.33	269.15	33.97	25.57
chr3	134146692	134147946	1255	*	7.83762	6.30533	8.56382	-2.22322	8.32306e-39	4.12299e-36	75.87	82.3	367.8	389.03
chr10	10912648	10913901	1254	*	7.3064	5.0218	8.15019	-3.03606	1.01113e-38	4.9898e-36	33.83	31.14	265.9	302.27
chr17	71639122	71641709	2588	*	7.69477	8.45243	6.00164	2.40386	1.12074e-38	5.50976e-36	315.77	384.82	66.96	61.18
chr15	27111494	27113533	2040	*	7.0734	7.94712	4.49667	3.32948	1.19046e-38	5.83042e-36	238.88	254.69	22.32	22.83
chr2	224441895	224442874	980	*	7.13569	4.37978	8.02474	-3.50561	1.31831e-38	6.43231e-36	20.5	21.13	253.29	267.57
chr15	84322147	84323992	1846	*	7.08983	7.96504	4.49667	3.34492	1.32605e-38	6.44586e-36	231.7	268.04	22.32	22.83
chr9	100531425	100532469	1045	*	7.23807	4.82933	8.09539	-3.16886	1.4723e-38	7.13007e-36	24.61	32.25	262.99	284.01
chr22	45847550	45848855	1306	*	7.80002	6.24397	8.53113	-2.24927	1.47962e-38	7.13888e-36	74.84	76.74	359.07	380.81
chr1	92035198	92037007	1810	*	7.86516	6.36495	8.58456	-2.18698	1.49091e-38	7.1667e-36	75.87	88.98	383.33	384.46
chr6	43252573	43253609	1037	*	6.9709	7.90423	3.50215	4.16544	1.84016e-38	8.81289e-36	238.88	240.23	12.62	10.05
chr14	93113966	93115183	1218	*	7.92797	6.43371	8.64609	-2.18251	1.88733e-38	8.99509e-36	72.79	100.1	408.56	392.68
chr5	172313648	172315976	2329	*	8.69024	7.70609	9.26989	-1.54876	1.89207e-38	8.99509e-36	216.33	201.31	634.67	599.98
chr16	70770424	70771610	1187	*	8.58289	7.56149	9.17492	-1.59875	1.9645e-38	9.30536e-36	187.62	190.19	586.15	569.84
chr22	48971009	48971926	918	*	6.96308	7.89362	3.55212	4.10718	2.29447e-38	1.07681e-35	240.93	234.67	10.67	12.78
chr1	179712147	179713678	1532	*	7.41826	8.2092	5.52824	2.62111	2.29711e-38	1.07681e-35	286.04	305.85	47.55	44.75
chr16	88337009	88338169	1161	*	8.09362	6.76715	8.77282	-1.97989	2.29819e-38	1.07681e-35	106.62	111.22	417.29	457.52
chr2	96781679	96782894	1216	*	7.45528	8.23643	5.62653	2.55372	2.65328e-38	1.23779e-35	297.32	305.85	49.49	49.31
chr12	3474583	3476399	1817	*	7.40308	8.1981	5.48662	2.65194	2.66084e-38	1.23779e-35	287.07	300.29	49.49	40.18
chr1	204288926	204290716	1791	*	8.13892	6.86664	8.8043	-1.91186	3.06683e-38	1.42155e-35	119.95	113.44	450.29	443.82
chr4	154925072	154926963	1892	*	7.99417	6.61497	8.68622	-2.04043	3.22429e-38	1.48922e-35	101.5	94.54	404.68	419.16
chr12	116818910	116821086	2177	*	8.99546	8.14373	9.52741	-1.37388	3.5227e-38	1.62128e-35	280.91	284.72	761.8	714.13
chr21	46784247	46785787	1541	*	9.05101	8.23005	9.57099	-1.33175	3.75336e-38	1.72133e-35	302.44	298.07	770.54	750.66
chr18	29264229	29265935	1707	*	8.08147	8.76707	6.72905	2.00639	3.86306e-38	1.7654e-35	400.87	470.46	98.02	114.15
chr7	1577881	1579022	1142	*	8.65977	7.67901	9.23826	-1.54587	3.87688e-38	1.7655e-35	203	206.87	614.29	593.58
chr1	20753065	20754450	1386	*	7.35691	5.25763	8.17791	-2.83904	5.14502e-38	2.33482e-35	42.03	34.48	297.93	281.27
chr16	17929649	17930954	1306	*	7.35384	5.2658	8.17335	-2.83284	5.64873e-38	2.55447e-35	36.91	40.04	297.93	279.44
chr12	1662256	1663848	1593	*	7.9184	6.47375	8.62559	-2.12166	5.74491e-38	2.58894e-35	80.99	96.76	402.74	387.2
chr11	33743508	33746491	2984	*	9.01953	8.1873	9.54394	-1.34646	6.56461e-38	2.94533e-35	299.37	283.61	755.98	736.96
chr13	42184994	42185901	908	*	7.42034	5.45486	8.2227	-2.704	6.58114e-38	2.94533e-35	41.01	46.71	297.93	299.53
chr16	88339677	88340410	734	*	7.87765	6.40099	8.59194	-2.15243	7.24106e-38	3.22031e-35	92.27	76.74	388.18	383.55
chr11	22213921	22215480	1560	*	7.05358	7.92496	4.50215	3.30598	7.24518e-38	3.22031e-35	235.8	250.24	25.23	20.09
chr11	10407369	10409103	1735	*	7.55923	5.75699	8.33598	-2.52726	7.33914e-38	3.25094e-35	49.21	58.95	335.78	310.49
chr3	139020006	139021196	1191	*	8.24337	6.98911	8.90401	-1.88833	7.46601e-38	3.29589e-35	138.41	115.67	451.26	506.83
chr6	139897902	139899504	1603	*	7.77243	6.21271	8.50429	-2.25171	7.51676e-38	3.30704e-35	73.82	74.52	375.56	350.67
chr3	124509403	124512899	3497	*	8.8536	7.95178	9.40429	-1.44004	8.85679e-38	3.88343e-35	259.38	235.79	665.73	689.47
chr17	31269961	31271798	1838	*	7.42616	5.47304	8.22669	-2.6911	9.12779e-38	3.98878e-35	41.01	47.82	295.02	304.1
chr17	1173535	1174694	1160	*	7.17496	8.01304	4.93927	2.98765	9.40184e-38	4.09475e-35	255.28	261.37	33.97	27.4
chr10	115802883	115805436	2554	*	8.09146	8.75795	6.81495	1.91805	1.00756e-37	4.37351e-35	413.17	452.66	117.42	107.76
chr4	38162317	38163492	1176	*	7.51595	5.69034	8.29658	-2.54726	1.1153e-37	4.82503e-35	54.34	48.94	319.28	309.58
chr9	96716869	96718294	1426	*	7.00669	7.89177	4.29957	3.45121	1.1688e-37	5.03971e-35	248.11	226.89	17.47	21.92
chr5	97751046	97752174	1129	*	7.12966	4.52078	8.00628	-3.35966	1.17795e-37	5.06233e-35	22.56	23.36	249.41	264.83
chr11	27238805	27240265	1461	*	7.69504	6.08318	8.43733	-2.31191	1.35651e-37	5.81049e-35	66.64	68.96	343.54	349.76
chr2	239636435	239637249	815	*	7.55291	5.7761	8.32536	-2.49323	1.4024e-37	5.98726e-35	58.44	51.16	317.34	324.19
chr8	40343143	40344285	1143	*	7.15846	4.67839	8.023	-3.23132	1.41462e-37	6.01964e-35	25.63	25.58	258.14	262.09
chr9	118434888	118436679	1792	*	7.86949	6.41266	8.57941	-2.13069	1.47248e-37	6.24538e-35	89.2	81.19	383.33	381.72
chr13	42188026	42189245	1220	*	7.57357	5.76921	8.35068	-2.51881	1.87794e-37	7.93916e-35	64.59	44.49	324.13	328.75
chr1	165868471	165869486	1016	*	7.81698	6.20695	8.5589	-2.31288	2.06095e-37	8.68455e-35	67.67	80.08	339.66	414.6
chr2	231692588	231693880	1293	*	7.51649	8.27894	5.79692	2.43321	2.07752e-37	8.72605e-35	307.57	313.64	58.23	52.97
chr2	236547327	236549246	1920	*	8.26971	7.07139	8.91515	-1.82545	2.15426e-37	9.01919e-35	119.95	149.03	484.25	481.26
chr17	1970230	1971543	1314	*	7.9095	6.49433	8.60997	-2.08314	2.284e-37	9.53164e-35	90.22	90.09	397.88	383.55
chr11	66102131	66104155	2025	*	9.34827	8.63718	9.82247	-1.17923	2.38621e-37	9.92626e-35	393.69	402.62	913.19	897.68
chr3	185374512	185376387	1876	*	8.10805	6.75479	8.79385	-2.01616	2.44222e-37	1.01268e-34	89.2	126.79	433.79	453.86
chr14	73212543	73214287	1745	*	7.70093	6.10392	8.4403	-2.29324	2.59191e-37	1.07133e-34	69.72	67.84	352.27	342.45
chr19	34112291	34114416	2126	*	7.68385	8.42341	6.08589	2.29634	2.68018e-37	1.10429e-34	322.95	363.69	73.75	62.1
chr13	24723173	24724586	1414	*	7.93511	6.54272	8.63027	-2.05501	2.92113e-37	1.19976e-34	96.37	90.09	399.82	392.68
chr17	21279527	21281057	1531	*	7.53993	8.29766	5.84643	2.40501	3.28222e-37	1.34382e-34	316.8	312.53	62.11	52.97
chr8	131503085	131504818	1734	*	8.07586	6.78397	8.74632	-1.93427	3.42059e-37	1.39606e-34	115.85	104.55	426.03	432.86
chr5	65155614	65157529	1916	*	7.72052	6.09752	8.46497	-2.3191	3.53628e-37	1.43876e-34	76.89	60.06	338.69	368.02
chr6	34111514	34113899	2386	*	7.87538	8.5865	6.41314	2.13767	3.58615e-37	1.45449e-34	350.63	418.19	87.34	83.1
chr5	158127838	158129587	1750	*	7.41735	5.42659	8.22338	-2.73492	3.67969e-37	1.48777e-34	34.86	51.16	287.25	310.49
chr8	128771918	128773873	1956	*	7.5318	5.67962	8.31675	-2.57759	3.70442e-37	1.49312e-34	50.24	52.27	345.48	292.23
chr16	11453567	11454364	798	*	7.39781	5.41781	8.20229	-2.71762	3.85696e-37	1.54979e-34	41.01	44.49	279.49	309.58
chr20	18036968	18038532	1565	*	7.10588	7.9526	4.79543	3.05945	4.33828e-37	1.73781e-34	242.98	252.47	28.14	27.4
chr16	66961281	66962735	1455	*	7.66776	6.04438	8.41229	-2.32127	5.04775e-37	2.01579e-34	69.72	62.28	342.57	338.8
chr21	43460868	43461714	847	*	8.08575	6.80845	8.75245	-1.91837	5.24817e-37	2.0894e-34	110.73	113.44	441.55	420.99
chr15	100880958	100882265	1308	*	7.11614	7.95855	4.84355	3.02055	6.18753e-37	2.45584e-34	245.03	252.47	29.11	28.31
chr10	644790	646530	1741	*	8.21206	6.9497	8.87484	-1.89577	6.53022e-37	2.58396e-34	140.46	106.77	451.26	487.65
chr2	238164304	238166280	1977	*	8.91281	8.05837	9.4458	-1.37712	6.77283e-37	2.66866e-34	270.66	262.48	686.11	708.65
chr1	37498743	37500886	2144	*	6.92806	7.85986	3.49117	4.11817	6.7854e-37	2.66866e-34	213.25	251.36	9.7	12.78
chr15	91095040	91096748	1709	*	7.79732	6.29195	8.51783	-2.18794	6.99762e-37	2.74381e-34	79.97	76.74	352.27	380.81
chr16	11734461	11735369	909	*	7.99368	6.63617	8.68051	-2.01235	8.18025e-37	3.19786e-34	106.62	92.31	395.94	424.64
chr22	45404052	45406371	2320	*	7.67503	8.41223	6.0889	2.27793	9.05413e-37	3.52885e-34	319.87	361.46	63.08	73.06
chr11	12221097	12223382	2286	*	8.18972	6.93318	8.85096	-1.88996	9.25517e-37	3.59641e-34	134.31	110.11	437.67	485.83
chr2	11622221	11623806	1586	*	7.69485	8.42428	6.14699	2.23427	9.58486e-37	3.7134e-34	331.15	355.9	65.02	76.71
chr2	239148819	239150194	1376	*	7.70873	8.43018	6.19894	2.19364	1.0412e-36	4.02184e-34	337.3	352.57	75.7	71.23
chr4	13921746	13922491	746	*	7.2376	5.01599	8.07401	-2.9617	1.17227e-36	4.51471e-34	36.91	27.8	265.9	273.05
chr1	99921981	99923208	1228	*	7.20953	4.92154	8.05371	-3.03138	1.20708e-36	4.63502e-34	32.81	27.8	277.55	253.87
chr16	84870250	84870848	599	*	7.32537	5.28811	8.13797	-2.77872	1.21725e-36	4.66029e-34	35.88	42.26	277.55	285.83
chr1	162205669	162206815	1147	*	7.05825	4.20999	7.95444	-3.57581	1.34106e-36	5.11916e-34	22.56	14.46	235.82	260.26
chr5	136588508	136589774	1267	*	7.47841	5.62808	8.26306	-2.57223	1.35182e-36	5.14513e-34	53.31	45.6	291.13	323.27
chr8	142162767	142164310	1544	*	8.43824	7.38196	9.04149	-1.64184	1.3989e-36	5.2957e-34	171.21	162.38	526.95	526.92
chr15	44392762	44394922	2161	*	7.38498	5.32672	8.20047	-2.78771	1.39954e-36	5.2957e-34	50.24	30.03	282.4	305.92
chr2	74740984	74743774	2791	*	7.71517	8.43406	6.21732	2.18043	1.64335e-36	6.18575e-34	354.73	337	76.67	72.14
chr4	151203983	151204770	788	*	7.04375	4.25927	7.93506	-3.52061	1.64825e-36	6.18575e-34	20.5	17.8	247.46	242
chr9	136150078	136151505	1428	*	6.92591	7.82402	4.05156	3.61641	1.64906e-36	6.18575e-34	229.65	223.55	20.38	12.78
chr22	27857707	27858579	873	*	7.4084	5.47727	8.20565	-2.66751	1.81416e-36	6.78544e-34	37.93	51.16	302.78	287.66
chr19	10928654	10929823	1170	*	8.5086	7.46816	9.10679	-1.62503	1.91048e-36	7.12517e-34	165.06	189.07	533.75	568.93
chr2	121317301	121318866	1566	*	7.81365	6.35288	8.52444	-2.1374	2.10675e-36	7.83462e-34	78.94	84.53	362.95	373.5
chr9	129948604	129949809	1206	*	8.33902	7.2346	8.95718	-1.70459	2.30998e-36	8.56587e-34	146.61	154.6	503.66	490.39
chr3	15837787	15839478	1692	*	7.61682	5.94472	8.3706	-2.37281	2.54558e-36	9.41264e-34	68.69	54.5	338.69	323.27
chr22	40907309	40908399	1091	*	7.0641	4.40898	7.94478	-3.39419	2.63628e-36	9.71641e-34	23.58	18.91	241.64	251.13
chr1	66737249	66738445	1197	*	7.65529	6.03142	8.39991	-2.32785	2.64271e-36	9.71641e-34	57.41	73.4	336.75	338.8
chr1	11750670	11752577	1908	*	7.91996	8.60876	6.55432	2.02175	2.77419e-36	1.01653e-33	367.03	413.74	90.25	97.71
chr4	16629959	16631025	1067	*	7.1593	4.81603	8.00965	-3.08661	2.78047e-36	1.01653e-33	30.76	25.58	254.26	261.18
chr1	215130922	215132119	1198	*	7.46749	5.63945	8.24852	-2.55424	2.84534e-36	1.03733e-33	44.09	55.61	310.54	297.71
chr14	38611925	38614340	2416	*	7.90034	6.49904	8.59759	-2.06391	2.86086e-36	1.04006e-33	96.37	84.53	377.5	397.24
chr3	134183446	134184026	581	*	7.39143	5.44626	8.19078	-2.67377	2.94823e-36	1.06883e-33	47.16	40.04	277.55	306.84
chr2	239343455	239344665	1211	*	8.06318	6.77667	8.73226	-1.92637	3.17211e-36	1.14679e-33	115.85	103.43	439.61	410.94
chr16	49888428	49889951	1524	*	8.32151	8.93935	7.21813	1.70049	3.52896e-36	1.27226e-33	474.68	507.16	140.72	157.07
chr6	90120822	90122534	1713	*	7.98987	8.65868	6.70439	1.92645	3.55798e-36	1.27917e-33	410.09	398.17	98.99	109.58
chr17	81150110	81150941	832	*	7.8993	6.49765	8.59663	-2.06313	3.75733e-36	1.34711e-33	98.42	82.3	384.3	389.94
chr17	771856	774019	2164	*	8.45739	7.40514	9.05935	-1.63894	3.81524e-36	1.3641e-33	159.94	179.06	548.3	518.7
chr3	123468794	123469627	834	*	7.2511	5.08483	8.08072	-2.90323	4.02796e-36	1.43344e-33	38.96	28.92	262.02	279.44
chr19	43437566	43438430	865	*	7.61939	5.98526	8.36599	-2.33237	4.03127e-36	1.43344e-33	66.64	60.06	333.83	326.01
chr7	116771597	116773692	2096	*	7.54312	5.82047	8.30611	-2.43257	4.08245e-36	1.44768e-33	57.41	55.61	328.01	305.01
chr17	8054671	8055763	1093	*	8.42143	7.3619	9.0257	-1.6473	4.30995e-36	1.52418e-33	159.94	169.05	533.75	508.66
chr17	35848751	35850599	1849	*	9.1653	8.40659	9.65994	-1.2469	4.4593e-36	1.57271e-33	325	353.68	816.15	801.79
chr3	138838284	138840838	2555	*	8.24067	7.08539	8.87388	-1.76594	4.8215e-36	1.69585e-33	141.48	130.13	471.64	466.65
chr12	1660909	1662128	1220	*	7.64531	5.99808	8.39441	-2.35532	5.06115e-36	1.77533e-33	53.31	74.52	339.66	333.32
chr2	133013943	133015894	1952	*	7.28643	8.09023	5.31106	2.71194	5.13708e-36	1.79711e-33	261.44	283.61	45.61	33.79
chr9	73020818	73022000	1183	*	7.79012	6.30834	8.50554	-2.15702	5.15472e-36	1.79843e-33	85.09	73.4	370.71	356.15
chr10	50347399	50348043	645	*	7.45162	5.59267	8.23765	-2.57695	5.4779e-36	1.90606e-33	55.36	41.15	310.54	293.14
chr9	100528669	100529552	884	*	7.22782	4.97154	8.06834	-2.99874	5.84316e-36	2.02772e-33	33.83	28.92	245.52	291.31
chr8	56013672	56015451	1780	*	6.95341	7.90888	2.91353	4.6282	5.96192e-36	2.06341e-33	233.75	246.91	7.76	7.31
chr14	96569854	96572260	2407	*	8.58975	7.60361	9.17007	-1.55053	6.23243e-36	2.1513e-33	199.92	189.07	597.8	554.32
chr6	88875364	88877363	2000	*	7.67656	8.40121	6.15165	2.21125	6.26087e-36	2.15538e-33	354.73	321.42	72.78	69.4
chr18	29077552	29078749	1198	*	6.9143	7.85986	3.15915	4.38897	6.73701e-36	2.31317e-33	213.25	251.36	8.73	9.13
chr22	48884855	48886418	1564	*	7.40053	8.17564	5.60806	2.50726	8.12206e-36	2.78137e-33	289.12	289.17	43.67	53.88
chr1	165865968	165866791	824	*	7.90033	6.45885	8.6068	-2.10707	8.15207e-36	2.7843e-33	102.52	73.4	384.3	395.42
chr6	134871553	134873857	2305	*	7.29126	5.21168	8.10963	-2.81007	9.5459e-36	3.2518e-33	44.09	30.03	277.55	274.87
chr9	101792704	101793950	1247	*	7.31426	5.29419	8.12446	-2.74892	1.07728e-35	3.66014e-33	45.11	33.37	281.43	276.7
chr2	127772628	127774316	1689	*	7.74727	6.2044	8.47567	-2.23082	1.16698e-35	3.95453e-33	70.74	76.74	381.39	330.58
chr3	36566772	36568594	1823	*	7.13935	4.78271	7.99115	-3.09383	1.40888e-35	4.76181e-33	32.81	22.24	251.35	257.52
chr15	67418185	67419899	1715	*	8.41379	7.36221	9.01555	-1.63461	1.54594e-35	5.21151e-33	172.24	156.82	518.22	516.87
chr5	141255606	141256853	1248	*	7.12778	7.96133	4.92982	2.93597	1.6127e-35	5.42249e-33	233.75	264.7	27.17	33.79
chr20	61637177	61639038	1862	*	6.98426	7.86304	4.35097	3.38203	1.70012e-35	5.70164e-33	214.27	251.36	26.2	14.61
chr3	124550881	124551842	962	*	7.38678	5.49099	8.17862	-2.62493	1.8729e-35	6.26489e-33	41.01	48.94	302.78	276.7
chr9	125164072	125165685	1614	*	7.68715	6.14719	8.41494	-2.22575	1.99016e-35	6.63518e-33	72.79	68.96	332.86	349.76
chr11	72968423	72970126	1704	*	8.00853	6.72985	8.67559	-1.91848	1.99382e-35	6.63518e-33	106.62	105.66	410.5	407.29
chr16	56944235	56947337	3103	*	8.06868	6.82269	8.72712	-1.87941	1.99948e-35	6.63699e-33	110.73	115.67	434.76	412.77
chr10	24752757	24754198	1442	*	7.89999	6.54474	8.58628	-2.01068	2.08471e-35	6.90226e-33	93.3	93.42	383.33	385.37
chr19	3867982	3869150	1169	*	6.95242	7.82075	4.43328	3.26108	2.14589e-35	7.08672e-33	228.63	223.55	20.38	22.83
chr9	139947770	139949597	1828	*	7.43915	8.19912	5.73333	2.41447	2.262e-35	7.45122e-33	295.27	292.51	54.35	52.05
chr17	4401301	4403546	2246	*	7.64554	8.36969	6.12299	2.20788	2.28191e-35	7.49776e-33	343.45	318.09	71.81	67.58
chr10	17065891	17066885	995	*	7.08802	4.63919	7.94946	-3.18633	2.56167e-35	8.39573e-33	28.71	21.13	253.29	241.09
chr8	103549403	103550927	1525	*	7.7581	6.23019	8.48338	-2.21774	2.59321e-35	8.47769e-33	65.62	84.53	337.72	378.07
chr8	103548009	103549186	1178	*	7.43523	5.6092	8.21593	-2.54079	2.62169e-35	8.54928e-33	55.36	42.26	296.96	297.71
chr17	66048836	66049763	928	*	7.12727	4.82047	7.97357	-3.04972	2.6964e-35	8.77088e-33	28.71	27.8	255.23	247.48
chr9	101136624	101138175	1552	*	7.67872	6.01523	8.43089	-2.36924	2.82936e-35	9.18035e-33	61.51	67.84	306.66	383.55
chr20	55008011	55008977	967	*	7.49794	5.77839	8.26038	-2.42794	2.93346e-35	9.49438e-33	56.39	53.39	302.78	310.49
chr4	186227497	186229169	1673	*	7.34782	5.4134	8.14556	-2.66108	3.01617e-35	9.73781e-33	44.09	41.15	296.96	269.4
chr16	75339700	75341030	1331	*	7.70332	6.14649	8.43459	-2.25129	3.22577e-35	1.03887e-32	60.49	81.19	336.75	355.24
chr15	99433233	99434931	1699	*	7.78865	6.34535	8.49553	-2.11671	3.46633e-35	1.11358e-32	75.87	86.75	362.95	358.89
chr17	13248551	13250365	1815	*	7.76119	6.28007	8.47646	-2.15672	3.72779e-35	1.19462e-32	82.02	73.4	341.6	370.76
chr13	49356591	49358642	2052	*	7.88376	6.50389	8.57596	-2.03971	3.8967e-35	1.24556e-32	89.2	92.31	398.85	364.37
chr15	30260413	30261481	1069	*	7.59239	8.32501	6.029	2.25222	3.91315e-35	1.24556e-32	332.18	309.19	62.11	68.49
chr1	236045448	236047421	1974	*	7.6221	6.03314	8.35986	-2.28004	3.91555e-35	1.24556e-32	68.69	62.28	332.86	324.19
chr22	46658373	46659584	1212	*	7.78277	8.4889	6.34285	2.11199	4.01113e-35	1.27284e-32	340.38	378.15	89.28	73.06
chr11	12000476	12002535	2060	*	8.5642	7.57345	9.14606	-1.55499	4.36691e-35	1.38236e-32	203	177.95	585.18	547.92
chr1	6478901	6480966	2066	*	7.77748	8.47536	6.37346	2.06971	4.39513e-35	1.38791e-32	367.03	344.78	86.37	79.45
chr12	25982527	25983402	876	*	7.38435	5.53274	8.1692	-2.57098	4.69224e-35	1.47813e-32	49.21	43.38	285.31	290.4
chr16	85397807	85398831	1025	*	7.33651	5.31133	8.14743	-2.75233	4.89992e-35	1.53654e-32	47.16	32.25	262.99	304.1
chr17	38642565	38643778	1214	*	7.90067	6.53274	8.59002	-2.02352	4.90131e-35	1.53654e-32	98.42	86.75	370.71	399.98
chr11	28403709	28405975	2267	*	7.39624	5.52731	8.18386	-2.58589	5.16943e-35	1.61669e-32	53.31	38.93	292.11	289.49
chr4	61548017	61549796	1780	*	7.18977	5.01987	8.01984	-2.90627	5.79047e-35	1.80372e-32	34.86	30.03	269.78	249.31
chr2	238130016	238130730	715	*	7.20569	5.07781	8.03042	-2.87136	5.79529e-35	1.80372e-32	29.73	37.81	257.17	265.74
chr20	50178710	50180869	2160	*	9.11279	8.33623	9.61486	-1.27235	6.55115e-35	2.0341e-32	299.37	347.01	792.86	775.31
chr9	137702623	137703509	887	*	7.41405	5.60432	8.19205	-2.52918	6.972e-35	2.15961e-32	46.14	51.16	301.81	283.09
chr1	17027026	17028202	1177	*	7.15586	7.97015	5.10636	2.78699	7.686e-35	2.3751e-32	250.16	251.36	37.85	31.05
chr16	71070929	71071913	985	*	7.45284	5.6879	8.22325	-2.47453	7.81736e-35	2.40996e-32	56.39	46.71	301.81	295.88
chr5	73091500	73093805	2306	*	8.32332	7.23742	8.93581	-1.67954	8.34967e-35	2.56796e-32	152.76	149.03	472.61	506.83
chr15	41135597	41137104	1508	*	7.7873	8.48092	6.40149	2.04494	8.78946e-35	2.69683e-32	360.88	353.68	79.58	89.49
chr9	101782433	101783734	1302	*	8.09716	6.88606	8.74614	-1.83433	9.26296e-35	2.8354e-32	122	114.56	439.61	419.16
chr5	97749375	97750663	1289	*	7.07938	4.70699	7.93287	-3.11375	9.49155e-35	2.89854e-32	26.66	25.58	250.38	238.35
chr11	20053039	20054442	1404	*	7.48118	5.75699	8.24444	-2.43691	9.82544e-35	2.99346e-32	49.21	58.95	296.96	309.58
chr5	131604831	131605648	818	*	7.72007	6.24563	8.43388	-2.15147	1.23058e-34	3.74036e-32	72.79	78.97	346.45	345.19
chr17	60868150	60869625	1476	*	7.77277	6.32922	8.4797	-2.11185	1.37579e-34	4.17196e-32	84.07	76.74	368.77	345.19
chr19	15360079	15360783	705	*	7.90194	6.5481	8.58788	-2.01078	1.46997e-34	4.44716e-32	88.17	98.99	366.83	402.72
chr17	39703761	39705621	1861	*	8.41188	7.3812	9.00693	-1.60777	1.51769e-34	4.58085e-32	173.27	160.16	506.57	522.35
chr20	46646598	46647382	785	*	7.23704	5.15054	8.05634	-2.81538	1.60165e-34	4.82305e-32	41.01	30.03	278.52	253.87
chr1	44794002	44795272	1271	*	7.40734	5.60818	8.18358	-2.51983	1.85322e-34	5.56768e-32	43.06	54.5	290.16	291.31
chr16	58496863	58498661	1799	*	7.62617	8.35139	6.09855	2.20815	2.08774e-34	6.25776e-32	310.65	342.56	63.08	73.97
chr5	131430766	131431684	919	*	7.90697	6.56713	8.58949	-1.99509	2.38859e-34	7.14304e-32	85.09	104.55	381.39	389.03
chr20	43124782	43125758	977	*	7.85445	6.4654	8.54883	-2.05359	2.41548e-34	7.20685e-32	79.97	96.76	359.07	389.94
chr14	91883546	91885178	1633	*	7.58763	8.31772	6.03657	2.24106	2.54164e-34	7.56586e-32	317.82	320.31	73.75	57.53
chr14	61644178	61645522	1345	*	7.88601	6.5481	8.56806	-1.99121	2.61279e-34	7.75987e-32	88.17	98.99	374.59	384.46
chr15	40573756	40575807	2052	*	7.89735	8.56574	6.61355	1.9243	2.79555e-34	8.28369e-32	375.24	382.6	99.96	95.89
chr14	103609265	103610489	1225	*	7.13099	4.8906	7.96963	-2.97302	2.81759e-34	8.33e-32	34.86	24.47	247.46	253.87
chr2	177052846	177054330	1485	*	7.78436	8.47589	6.40733	2.03771	2.9558e-34	8.71873e-32	363.96	348.12	91.22	78.54
chr17	38697888	38699103	1216	*	8.08417	6.88818	8.72896	-1.817	2.97133e-34	8.74466e-32	117.9	119.01	422.15	426.47
chr7	106125776	106126860	1085	*	7.6077	6.01793	8.34563	-2.27804	3.00397e-34	8.82074e-32	71.77	57.83	316.37	334.23
chr1	51778976	51780935	1960	*	7.84636	6.47571	8.53635	-2.02729	3.14288e-34	9.20778e-32	91.25	86.75	358.1	384.46
chr2	233791644	233793464	1821	*	7.67381	8.38143	6.22724	2.11825	3.53831e-34	1.03429e-31	332.18	334.77	78.61	71.23
chr1	28189931	28191099	1169	*	7.55482	5.93083	8.29946	-2.32289	3.60063e-34	1.05015e-31	56.39	65.62	325.1	305.01
chr3	134052701	134053682	982	*	7.67641	6.15406	8.40051	-2.20155	3.99861e-34	1.1636e-31	77.92	64.51	326.07	349.76
chr12	96821605	96822513	909	*	7.35272	5.51941	8.13461	-2.5513	4.1361e-34	1.20092e-31	46.14	45.6	286.28	275.79
chr22	19867207	19868696	1490	*	9.02804	8.25976	9.52668	-1.25934	4.18332e-34	1.21192e-31	299.37	313.64	733.66	741.52
chr16	70774308	70775083	776	*	7.94869	6.66512	8.61701	-1.92481	4.35989e-34	1.26026e-31	98.42	104.55	385.27	399.98
chr19	55690219	55691593	1375	*	7.61276	6.05555	8.34411	-2.24228	4.37871e-34	1.26289e-31	70.74	62.28	320.25	329.67
chr1	92116554	92117486	933	*	7.43603	5.66759	8.20704	-2.48303	4.43435e-34	1.2761e-31	47.16	54.5	312.48	278.53
chr4	3767082	3769476	2395	*	7.94699	8.61475	6.66558	1.91897	4.51747e-34	1.29714e-31	368.06	415.96	98.02	105.02
chr1	31141683	31143150	1468	*	7.45793	5.7315	8.2216	-2.43038	4.82848e-34	1.38339e-31	58.44	47.82	305.69	291.31
chr9	129922290	129924068	1779	*	7.94506	6.62871	8.62173	-1.95991	5.22958e-34	1.495e-31	105.6	92.31	413.41	374.41
chr3	154787507	154789730	2224	*	7.89528	6.52092	8.58617	-2.03776	5.43532e-34	1.55041e-31	76.89	106.77	382.36	386.29
chr5	58422135	58423423	1289	*	7.37442	5.52895	8.15829	-2.57118	5.93865e-34	1.69026e-31	38.96	53.39	273.67	297.71
chr16	329985	331733	1749	*	8.12379	8.76451	6.94228	1.79873	6.07004e-34	1.72388e-31	405.99	463.79	129.07	116.89
chr2	107502386	107504302	1917	*	7.58846	8.30901	6.08285	2.1852	6.79528e-34	1.92563e-31	310.65	323.65	68.9	66.66
chr1	166889706	166890880	1175	*	6.80242	7.70909	3.80574	3.69955	6.83744e-34	1.93336e-31	206.07	212.43	9.7	18.26
chr19	33668228	33669025	798	*	7.06368	4.76485	7.90908	-3.03728	7.92899e-34	2.23713e-31	27.68	26.69	238.73	242
chr14	65094743	65095880	1138	*	7.38118	5.54191	8.16404	-2.55042	9.5006e-34	2.67474e-31	55.36	37.81	281.43	292.23
chr19	47465105	47466267	1163	*	7.63331	6.061	8.36774	-2.25499	1.03348e-33	2.9033e-31	77.92	55.61	331.89	328.75
chr1	170430084	170432272	2189	*	7.19594	5.15758	8.00869	-2.76799	1.07778e-33	3.01702e-31	36.91	34.48	263.96	251.13
chr3	170745808	170747678	1871	*	7.95443	6.68803	8.61827	-1.90353	1.07861e-33	3.01702e-31	99.45	106.77	396.91	389.03
chr6	106611564	106612879	1316	*	7.58666	6.01987	8.31996	-2.25193	1.12168e-33	3.13075e-31	69.72	60.06	323.16	315.97
chr14	51386378	51388360	1983	*	7.30893	5.4321	8.0978	-2.5975	1.1784e-33	3.28199e-31	44.09	42.26	262.99	284.92
chr18	5894704	5896344	1641	*	7.3545	8.11621	5.63897	2.42093	1.20338e-33	3.3444e-31	275.79	279.16	48.52	51.14
chr4	8872756	8873863	1108	*	6.85082	7.80627	2.81163	4.59657	1.25656e-33	3.48474e-31	216.33	231.34	5.82	8.22
chr2	109789683	109791028	1346	*	8.03107	6.80621	8.68381	-1.85124	1.26489e-33	3.50035e-31	114.83	109	396.91	425.55
chr2	238132150	238132848	699	*	7.07165	4.76485	7.91796	-3.0452	1.28018e-33	3.53513e-31	27.68	26.69	227.09	256.61
chr9	71939454	71940807	1354	*	7.34423	8.11201	5.59449	2.4563	1.32786e-33	3.65901e-31	268.61	284.72	43.67	52.97
chr16	75353931	75354974	1044	*	7.4351	5.72108	8.19655	-2.41852	1.36262e-33	3.74683e-31	54.34	51.16	301.81	284.92
chr11	69632160	69633864	1705	*	6.86335	7.73568	4.30167	3.29476	1.37984e-33	3.78617e-31	206.07	220.21	18.44	21
chr19	1523554	1524652	1099	*	6.82147	7.70849	4.09075	3.46559	1.39298e-33	3.81415e-31	208.12	210.21	20.38	13.7
chr5	148866041	148867074	1034	*	7.47514	5.80396	8.22875	-2.3701	1.42785e-33	3.9014e-31	59.46	52.27	294.05	305.92
chr10	26774058	26775985	1928	*	7.88012	6.49586	8.57337	-2.04891	1.47486e-33	4.02139e-31	74.84	105.66	391.09	370.76
chr22	19510603	19512711	2109	*	7.73408	8.42909	6.34235	2.05427	1.48181e-33	4.03187e-31	343.45	345.89	88.31	73.97
chr5	71747485	71749652	2168	*	8.2209	7.12176	8.83744	-1.69562	1.50704e-33	4.09193e-31	138.41	140.14	461.93	452.95
chr11	134281218	134282975	1758	*	6.89019	7.75206	4.4371	3.19165	1.54927e-33	4.19782e-31	214.27	216.88	22.32	21
chr9	102584118	102585536	1419	*	8.35906	7.33195	8.95295	-1.6037	1.57874e-33	4.26876e-31	160.96	161.27	500.75	490.39
chr3	140769498	140770939	1442	*	6.98328	7.83158	4.65865	3.058	1.63728e-33	4.41784e-31	240.93	214.65	20.38	30.14
chr1	212839712	212840858	1147	*	7.48022	5.80172	8.23518	-2.37679	1.65146e-33	4.44685e-31	61.51	50.05	293.08	309.58
chr9	114822372	114823636	1265	*	7.64169	6.07874	8.37421	-2.2546	1.70773e-33	4.58885e-31	58.44	76.74	351.3	312.32
chr5	95961490	95962643	1154	*	7.38905	5.57754	8.16735	-2.53171	1.74815e-33	4.68775e-31	41.01	54.5	303.75	271.22
chr17	5973204	5974778	1575	*	7.41383	8.16917	5.73333	2.38425	1.75973e-33	4.70908e-31	306.55	269.15	54.35	52.05
chr6	1145416	1146816	1401	*	7.61776	6.08225	8.34462	-2.21841	1.82688e-33	4.8787e-31	67.67	67.84	339.66	310.49
chr11	117666473	117668279	1807	*	6.84369	7.72085	4.22887	3.34397	1.87991e-33	5.01003e-31	205.05	216.88	16.5	21
chr10	10872896	10873997	1102	*	7.47176	5.77405	8.23025	-2.40734	1.9667e-33	5.23057e-31	47.16	62.28	289.19	311.4
chr8	142156720	142157954	1235	*	8.24165	7.11699	8.86588	-1.73111	2.07327e-33	5.50274e-31	123.03	154.6	476.49	456.6
chr8	37729207	37730185	979	*	6.96064	4.37978	7.83473	-3.31627	2.08775e-33	5.52695e-31	20.5	21.13	216.41	240.17
chr10	5986674	5987897	1224	*	7.87885	6.57029	8.55355	-1.95381	2.09091e-33	5.52695e-31	93.3	96.76	369.74	381.72
chr2	239552122	239553336	1215	*	7.85877	6.46525	8.5542	-2.05288	2.20669e-33	5.82112e-31	93.3	83.41	344.51	407.29
chr7	34171703	34173890	2188	*	7.83142	6.47289	8.5185	-2.01018	2.22098e-33	5.84695e-31	95.35	82.3	358.1	375.33
chr1	59523133	59524023	891	*	7.13032	4.96553	7.95975	-2.8926	2.24605e-33	5.90096e-31	36.91	25.58	251.35	246.57
chr7	2288644	2289996	1353	*	8.19202	7.08271	8.81165	-1.70851	2.33278e-33	6.11647e-31	134.31	136.8	450.29	448.38
chr6	169563358	169564002	645	*	7.4771	5.77036	8.23723	-2.4056	2.50182e-33	6.54644e-31	63.56	45.6	292.11	311.4
chr18	11148395	11150272	1878	*	8.45018	9.03431	7.45268	1.56509	2.51076e-33	6.55661e-31	552.6	496.04	164.98	185.38
chr1	23279471	23280581	1111	*	7.00292	7.8414	4.76394	2.97063	2.7325e-33	7.12134e-31	217.35	241.35	23.29	31.05
chr3	134145162	134146373	1212	*	8.13101	6.98872	8.76044	-1.74984	2.7751e-33	7.21788e-31	126.1	127.9	429.91	437.43
chr6	132406255	132407240	986	*	7.0932	4.86545	7.93034	-2.95731	2.78817e-33	7.23735e-31	33.83	24.47	251.35	236.52
chr20	23029333	23031292	1960	*	7.68701	8.38383	6.28752	2.06091	2.84924e-33	7.38113e-31	332.18	335.88	78.61	77.62
chr14	96654899	96656684	1786	*	7.82959	6.45686	8.52008	-2.02682	2.95305e-33	7.63482e-31	92.27	83.41	387.21	347.02
chr2	235582234	235583304	1071	*	7.15546	5.07781	7.97357	-2.81424	3.12161e-33	8.05455e-31	29.73	37.81	255.23	247.48
chr12	56240490	56242885	2396	*	8.39121	7.33437	8.99463	-1.64598	3.16041e-33	8.11969e-31	141.48	181.29	497.84	522.35
chr10	91274141	91275370	1230	*	7.33088	5.50043	8.1123	-2.54577	3.16308e-33	8.11969e-31	47.16	43.38	263.96	289.49
chr21	30534712	30536406	1695	*	7.75395	6.35885	8.44975	-2.05464	3.16562e-33	8.11969e-31	84.07	80.08	352.27	347.02
chr10	83634004	83635800	1797	*	6.79507	7.68353	4.04657	3.47782	3.34327e-33	8.55844e-31	200.95	210.21	18.44	14.61
chr10	121201281	121202261	981	*	7.36429	5.56036	8.14133	-2.51205	3.45913e-33	8.83761e-31	54.34	40.04	284.34	280.35
chr11	65255394	65256228	835	*	8.60464	7.69428	9.15844	-1.45141	3.55764e-33	9.07141e-31	204.02	210.21	580.33	562.53
chr16	66959994	66961143	1150	*	7.45559	5.79519	8.20718	-2.3604	3.60177e-33	9.16595e-31	54.34	56.72	297.93	293.14
chr4	6473581	6474678	1098	*	6.85699	7.72524	4.33878	3.25271	3.87038e-33	9.83025e-31	203	220.21	20.38	20.09
chr16	10964249	10966237	1989	*	7.42118	5.72464	8.17947	-2.40091	3.93288e-33	9.96947e-31	51.26	54.5	293.08	286.75
chr17	80354688	80356198	1511	*	7.61942	6.11644	8.33942	-2.18116	4.39364e-33	1.11157e-30	68.69	70.07	330.92	316.88
chr2	119425506	119426410	905	*	7.34468	5.54997	8.12017	-2.50609	4.76821e-33	1.20399e-30	49.21	44.49	268.81	287.66
chr2	238578772	238579924	1153	*	8.06827	6.89599	8.70637	-1.78758	5.38455e-33	1.35698e-30	115.85	122.34	415.35	420.07
chr7	157476780	157478223	1444	*	6.82216	7.69996	4.20006	3.35408	5.4218e-33	1.36372e-30	197.87	217.99	19.41	17.35
chr3	55224372	55225392	1021	*	7.61885	6.11915	8.33814	-2.17933	5.5041e-33	1.38174e-30	65.62	73.4	321.22	326.01
chr11	45201347	45203683	2337	*	9.41353	9.87201	8.73757	1.12649	5.62685e-33	1.40983e-30	877.6	996.53	415.35	438.34
chr9	84227458	84228814	1357	*	7.19691	5.19844	8.00405	-2.72304	5.67953e-33	1.42029e-30	38.96	34.48	266.87	246.57
chr22	50496511	50497693	1183	*	7.64334	8.34947	6.2034	2.10551	5.92075e-33	1.47776e-30	320.9	331.43	67.93	79.45
chr3	138663869	138666416	2548	*	8.40804	8.98717	7.42541	1.54618	5.97065e-33	1.48736e-30	491.09	523.84	177.59	166.2
chr6	132451744	132452976	1233	*	7.18571	5.1523	7.99777	-2.75804	6.01162e-33	1.49469e-30	39.98	31.14	244.55	266.66
chr19	7701607	7702914	1308	*	7.50081	8.23987	5.90529	2.28235	6.80127e-33	1.6878e-30	306.55	298.07	50.46	69.4
chr9	118411840	118413165	1326	*	7.19993	5.22348	8.00389	-2.70252	7.11599e-33	1.76252e-30	36.91	37.81	265.9	247.48
chr13	42163367	42164472	1106	*	6.98957	4.57857	7.84713	-3.14227	7.22455e-33	1.786e-30	26.66	21.13	221.26	239.26
chr20	49983199	49984284	1086	*	7.64698	6.18075	8.35898	-2.13826	7.25251e-33	1.78951e-30	72.79	72.29	326.07	330.58
chr12	80903924	80905811	1888	*	7.14616	5.08852	7.96156	-2.78429	7.74067e-33	1.90633e-30	36.91	31.14	246.49	252.04
chr5	7926666	7927991	1326	*	7.35645	5.53167	8.13694	-2.54811	8.15443e-33	2.00443e-30	36.91	55.61	270.76	292.23
chr11	71505612	71506762	1151	*	7.42596	5.68181	8.19275	-2.44435	8.80627e-33	2.16057e-30	61.51	41.15	291.13	294.05
chr2	231901941	231903408	1468	*	7.24567	8.023	5.43995	2.52215	9.12507e-33	2.23456e-30	265.54	254.69	47.55	39.27
chr6	132075533	132076799	1267	*	7.32607	5.49348	8.10784	-2.54178	9.48592e-33	2.31855e-30	52.29	37.81	281.43	270.31
chr11	45879939	45881449	1511	*	7.96992	6.7187	8.62976	-1.88021	9.81379e-33	2.39418e-30	112.78	97.87	410.5	381.72
chr8	129195889	129197031	1143	*	7.18368	5.18507	7.99084	-2.72777	1.04274e-32	2.53911e-30	33.83	38.93	264.93	243.83
chr11	72928783	72930213	1431	*	7.94274	8.59264	6.72829	1.83977	1.10522e-32	2.68453e-30	390.62	381.48	111.6	100.45
chr20	48866878	48869858	2981	*	8.51623	7.55684	9.08739	-1.51344	1.10749e-32	2.68453e-30	201.97	174.61	531.81	556.14
chr8	126649997	126651342	1346	*	7.35899	5.60045	8.1283	-2.46642	1.10867e-32	2.68453e-30	49.21	47.82	291.13	268.48
chr6	41471499	41473569	2071	*	7.83973	8.52303	6.49667	1.99167	1.19747e-32	2.89415e-30	334.23	401.5	89.28	91.32
chr21	43036127	43037044	918	*	7.59157	6.05366	8.31893	-2.21652	1.20567e-32	2.90854e-30	72.79	60.06	330.92	307.75
chr4	184826214	184828161	1948	*	7.19069	7.98016	5.31002	2.60393	1.26141e-32	3.03738e-30	261.44	243.57	44.64	34.7
chr15	39697413	39699190	1778	*	7.52543	5.95184	8.26012	-2.26094	1.31124e-32	3.15153e-30	61.51	62.28	316.37	296.79
chr9	93913676	93914759	1084	*	7.56441	5.96675	8.30391	-2.2892	1.36861e-32	3.28332e-30	59.46	65.62	342.57	289.49
chr16	75410831	75411971	1141	*	7.0235	4.76715	7.86402	-2.99165	1.46167e-32	3.5001e-30	26.66	27.8	235.82	230.13
chr5	172346342	172347528	1187	*	8.18575	7.09	8.80126	-1.69179	1.4825e-32	3.54345e-30	131.23	141.25	449.32	442.9
chr8	104510964	104513827	2864	*	7.94218	8.59043	6.73371	1.83122	1.48761e-32	3.54911e-30	378.31	392.61	109.66	103.19
chr9	114835857	114836985	1129	*	7.56991	6.03218	8.29724	-2.21731	1.61204e-32	3.83893e-30	69.72	61.17	324.13	305.01
chr12	110389336	110390971	1636	*	7.95383	6.71405	8.61061	-1.8677	1.70479e-32	4.05238e-30	107.65	102.32	403.71	378.07
chr11	65065482	65067231	1750	*	8.35072	7.25918	8.96495	-1.6802	1.74183e-32	4.13284e-30	177.37	129.01	501.72	497.7
chr11	65237899	65239615	1717	*	8.6617	7.78061	9.20474	-1.41014	1.81227e-32	4.29214e-30	230.68	209.09	592.94	587.19
chr11	12184449	12185690	1242	*	7.80984	6.44338	8.49883	-2.01637	1.84633e-32	4.36484e-30	98.42	75.63	360.04	363.46
chr11	88153485	88155033	1549	*	7.25678	5.39296	8.04359	-2.57849	1.93494e-32	4.56601e-30	45.11	38.93	261.05	266.66
chr8	49341495	49343275	1781	*	8.65234	7.75826	9.20019	-1.42681	1.9504e-32	4.59414e-30	231.7	201.31	591.97	584.45
chr9	17017386	17019211	1826	*	7.66919	6.14383	8.39393	-2.20849	2.07167e-32	4.87094e-30	63.56	77.85	366.83	305.92
chr11	12308895	12310217	1323	*	8.42164	7.44072	9.00019	-1.54539	2.1467e-32	5.03824e-30	165.06	182.4	502.69	521.44
chr21	47499549	47500690	1142	*	8.06441	6.89798	8.70084	-1.77692	2.20575e-32	5.16746e-30	125.08	113.44	423.12	409.12
chr7	105572715	105574731	2017	*	7.53656	5.99119	8.26547	-2.23043	2.30752e-32	5.39614e-30	60.49	66.73	308.6	306.84
chr2	232027136	232028197	1062	*	6.91701	4.37978	7.78706	-3.26931	2.34493e-32	5.47377e-30	20.5	21.13	212.53	229.21
chr19	47479632	47481092	1461	*	8.11056	6.97454	8.73815	-1.73977	2.42517e-32	5.6509e-30	129.18	122.34	436.7	417.33
chr10	43248490	43251017	2528	*	7.88306	8.56501	6.54552	1.98314	2.56905e-32	5.97545e-30	340.38	417.07	86.37	100.45
chr2	62805452	62807646	2195	*	7.57098	6.05649	8.29343	-2.19151	2.65494e-32	6.16416e-30	69.72	63.4	311.51	315.97
chr9	129895236	129896790	1555	*	8.47128	7.52344	9.03843	-1.50007	2.75633e-32	6.38813e-30	185.57	182.4	520.16	531.49
chr12	3225605	3226778	1174	*	7.6462	6.16791	8.36086	-2.15067	2.81013e-32	6.50122e-30	74.84	68.96	309.57	347.93
chr18	13216973	13218990	2018	*	7.61611	8.31949	6.18824	2.09229	2.83193e-32	6.54e-30	308.6	330.32	72.78	73.06
chr1	92049195	92050184	990	*	6.97916	4.64421	7.8286	-3.06601	2.84653e-32	6.56202e-30	26.66	23.36	230	224.65
chr1	27098419	27099273	855	*	7.65313	6.2144	8.35898	-2.10692	2.87734e-32	6.62129e-30	71.77	76.74	326.07	330.58
chr10	106060115	106061321	1207	*	8.2558	7.19134	8.86163	-1.65123	2.88288e-32	6.6223e-30	146.61	145.7	445.44	484.91
chr1	150584221	150585698	1478	*	7.70193	6.30375	8.39845	-2.05852	3.02655e-32	6.94001e-30	77.92	80.08	340.63	334.23
chr6	143656805	143659027	2223	*	7.28219	5.44338	8.06497	-2.54865	3.03188e-32	6.94001e-30	49.21	37.81	270.76	264.83
chr10	34815082	34816859	1778	*	7.8874	6.60625	8.55509	-1.92167	3.05113e-32	6.97178e-30	89.2	105.66	383.33	368.94
chr7	47708332	47709945	1614	*	7.66495	6.226	8.37085	-2.1075	3.09499e-32	7.05803e-30	70.74	78.97	340.63	321.45
chr3	48634506	48635839	1334	*	7.92836	6.64909	8.59556	-1.91301	3.09975e-32	7.05803e-30	111.75	88.98	374.59	399.07
chr2	15308956	15309875	920	*	7.17367	5.19023	7.97864	-2.71438	3.24524e-32	7.37049e-30	30.76	42.26	254.26	250.22
chr10	44358347	44359373	1027	*	7.15059	5.16109	7.95643	-2.71562	3.24834e-32	7.37049e-30	34.86	36.7	247.46	249.31
chr1	99929923	99931157	1235	*	6.92423	4.452	7.788	-3.20518	3.29572e-32	7.46496e-30	21.53	22.24	217.38	224.65
chr7	17409871	17411185	1315	*	7.1542	5.11554	7.96699	-2.7666	3.40582e-32	7.70088e-30	34.86	34.48	231.94	268.48
chr3	66462708	66464682	1975	*	7.91053	6.65905	8.57044	-1.88495	3.60599e-32	8.13759e-30	95.35	106.77	380.42	379.89
chr16	1030263	1032637	2375	*	7.82258	8.49311	6.53046	1.93021	3.61149e-32	8.13759e-30	368.06	352.57	84.43	100.45
chr19	35738644	35740485	1842	*	7.06402	7.88697	4.94994	2.83855	3.75983e-32	8.45714e-30	214.27	259.14	26.2	35.62
chr6	37210416	37211805	1390	*	8.03541	6.82313	8.68471	-1.83275	3.8455e-32	8.63488e-30	123.03	103.43	390.12	432.86
chr19	49376414	49378168	1755	*	8.54859	7.62998	9.10537	-1.46021	4.01987e-32	8.99701e-30	207.1	189.07	546.36	555.23
chr4	34182442	34184641	2200	*	7.18188	5.23983	7.98076	-2.66187	4.02064e-32	8.99701e-30	39.98	35.59	251.35	253.87
chr7	44417260	44418183	924	*	7.23777	5.34689	8.02884	-2.61372	4.53534e-32	1.01313e-29	36.91	44.49	247.46	274.87
chr7	157101821	157102761	941	*	7.75427	6.3937	8.44184	-2.01129	4.62108e-32	1.03051e-29	89.2	78.97	349.36	346.1
chr10	135043306	135044959	1654	*	6.82833	7.70826	4.18197	3.36029	4.68635e-32	1.04327e-29	195.82	222.44	11.65	24.66
chr7	26437553	26439086	1534	*	7.54587	8.2632	6.05526	2.16686	4.75857e-32	1.05597e-29	295.27	319.2	71.81	61.18
chr22	39852659	39854432	1774	*	7.81682	8.48666	6.52735	1.92808	4.75965e-32	1.05597e-29	340.38	377.03	93.16	91.32
chr19	7992546	7993634	1089	*	7.59136	6.10483	8.3078	-2.16046	4.78827e-32	1.0605e-29	68.69	68.96	325.1	308.66
chr12	58759032	58760388	1357	*	6.98818	4.67103	7.83565	-3.04461	4.93553e-32	1.09126e-29	28.71	22.24	236.79	220.08
chr21	40392625	40394375	1751	*	7.81059	6.49641	8.48672	-1.95935	5.04361e-32	1.11326e-29	87.15	93.42	365.86	351.58
chr20	20348311	20350372	2062	*	7.39475	8.14027	5.76621	2.31897	5.11498e-32	1.12709e-29	270.66	293.62	49.49	59.36
chr7	96635346	96636700	1355	*	6.74241	7.63466	3.94592	3.50618	5.42717e-32	1.19386e-29	205.05	192.41	11.65	19.18
chr2	113594682	113595745	1064	*	7.04735	4.82047	7.88439	-2.95766	5.55504e-32	1.21992e-29	28.71	27.8	255.23	217.34
chr7	157103084	157104683	1600	*	7.93308	6.63048	8.60628	-1.93848	5.72532e-32	1.25519e-29	115.85	82.3	394.97	384.46
chr3	13567411	13568494	1084	*	7.97398	6.7745	8.61974	-1.82013	5.9525e-32	1.30279e-29	106.62	112.33	394.97	391.77
chr12	54348663	54349622	960	*	6.7398	7.63163	3.9486	3.50164	6.25851e-32	1.36746e-29	188.64	207.98	12.62	18.26
chr15	71371987	71373157	1171	*	7.21632	5.31921	8.00836	-2.61419	6.30442e-32	1.37518e-29	42.03	37.81	246.49	268.48
chrX	109644947	109647120	2174	*	7.45127	5.7909	8.20285	-2.36432	6.42983e-32	1.40018e-29	45.11	65.62	298.9	290.4
chr1	1296375	1297289	915	*	7.87613	6.52895	8.56045	-2.00224	6.8305e-32	1.48494e-29	77.92	106.77	399.82	355.24
chr12	96040875	96041750	876	*	7.01181	4.73739	7.85444	-3.00761	6.84969e-32	1.48662e-29	26.66	26.69	214.47	248.39
chr11	27275031	27276354	1324	*	7.00557	4.69977	7.85177	-3.03311	6.95032e-32	1.50594e-29	29.73	22.24	215.44	246.57
chr17	39558660	39559519	860	*	6.95666	4.55798	7.81294	-3.13351	7.34755e-32	1.58936e-29	21.53	25.58	239.7	210.04
chr13	96741972	96743891	1920	*	7.23482	8.00345	5.48016	2.46028	7.71786e-32	1.66669e-29	256.31	256.92	42.7	46.57
chr4	170204799	170205903	1105	*	6.95432	4.61944	7.80375	-3.06891	7.90127e-32	1.70346e-29	23.58	25.58	222.23	224.65
chr1	87691064	87692930	1867	*	7.66838	6.2537	8.36874	-2.07685	8.06325e-32	1.7355e-29	75.87	76.74	339.66	321.45
chr12	2377227	2378313	1087	*	8.16229	7.07632	8.77481	-1.67769	8.18011e-32	1.7558e-29	135.33	134.58	437.67	438.34
chr8	40030623	40032246	1624	*	8.07222	6.92258	8.70381	-1.75519	8.18464e-32	1.7558e-29	129.18	113.44	421.17	412.77
chr10	22540600	22542646	2047	*	8.66437	9.19663	7.81184	1.37371	8.71112e-32	1.86566e-29	575.16	598.36	233.88	215.52
chr2	161776608	161778878	2271	*	7.88993	6.63932	8.54961	-1.88064	9.04458e-32	1.93389e-29	101.5	97.87	381.39	368.02
chr3	16100466	16101587	1122	*	8.07829	6.92103	8.71208	-1.76368	9.27816e-32	1.98057e-29	132.26	110.11	425.06	413.68
chr14	102770729	102772211	1483	*	8.37676	7.39005	8.95726	-1.54894	1.00475e-31	2.14127e-29	175.32	160.16	504.63	489.48
chr9	117485017	117486223	1207	*	6.86569	4.21675	7.74584	-3.36869	1.11654e-31	2.37561e-29	20.5	16.68	202.82	226.47
chr6	132077140	132078490	1351	*	7.06471	4.8906	7.89531	-2.89801	1.1224e-31	2.38417e-29	34.86	24.47	223.2	252.96
chr3	101809139	101810236	1098	*	7.14316	5.17815	7.94545	-2.68543	1.13203e-31	2.40069e-29	37.93	34.48	245.52	247.48
chr6	140371133	140372568	1436	*	7.49463	5.90951	8.23163	-2.27823	1.14346e-31	2.42099e-29	51.26	68.96	298.9	302.27
chr12	96030616	96031246	631	*	6.82538	3.96796	7.72225	-3.58002	1.16536e-31	2.46334e-29	11.28	20.02	208.65	213.69
chr17	48297378	48298911	1534	*	7.78693	6.47021	8.4637	-1.96181	1.16919e-31	2.46741e-29	86.12	91.2	359.07	347.02
chr2	121101185	121104532	3348	*	8.85716	9.39485	7.99033	1.38933	1.2236e-31	2.57805e-29	622.32	724.04	230.97	277.61
chr17	73583964	73586239	2276	*	8.67192	9.20776	7.81	1.38474	1.30807e-31	2.75155e-29	559.78	622.83	224.17	224.65
chr15	31316933	31318121	1189	*	7.36626	5.64322	8.12932	-2.43311	1.31771e-31	2.76735e-29	41.01	58.95	282.4	277.61
chr15	79295165	79297023	1859	*	7.71941	6.35442	8.40805	-2.02045	1.42535e-31	2.98855e-29	76.89	86.75	339.66	339.71
chr12	67462667	67463965	1299	*	7.89662	8.54709	6.68011	1.83892	1.44184e-31	3.01826e-29	358.83	389.27	101.9	103.19
chr10	77190930	77191828	899	*	7.40205	8.14462	5.78873	2.3001	1.55328e-31	3.24631e-29	276.81	289.17	47.55	63.01
chr14	101873805	101874844	1040	*	7.02435	4.87403	7.85195	-2.87898	1.58326e-31	3.30364e-29	29.73	28.92	231.94	230.13
chr18	47252120	47253692	1573	*	7.80902	6.51133	8.48097	-1.93834	1.62381e-31	3.38281e-29	91.25	91.2	348.39	366.2
chr1	40253773	40255231	1459	*	7.56435	8.27174	6.11883	2.1113	1.6473e-31	3.42625e-29	317.82	300.29	65.02	73.97
chr2	239637615	239638872	1258	*	7.89242	6.63756	8.55322	-1.88962	1.70909e-31	3.54908e-29	91.25	107.88	366.83	384.46
chr17	81103520	81104270	751	*	7.42038	5.80733	8.1629	-2.30341	1.82643e-31	3.7867e-29	56.39	55.61	289.19	284.01
chr7	5730261	5731715	1455	*	7.5262	5.98526	8.2542	-2.21971	1.83965e-31	3.80803e-29	66.64	60.06	320.25	290.4
chr7	157198028	157199395	1368	*	8.04651	6.89546	8.67851	-1.75927	1.84886e-31	3.82099e-29	116.88	121.23	423.12	396.33
chr19	17905506	17906581	1076	*	7.07266	7.87356	5.11705	2.67319	1.95726e-31	4.03859e-29	226.58	242.46	31.05	38.35
chr10	99789447	99791362	1916	*	7.27349	8.04828	5.48293	2.49874	1.98862e-31	4.09678e-29	235.8	293.62	45.61	43.83
chr10	44425561	44426849	1289	*	7.45644	5.76691	8.21344	-2.38031	2.04546e-31	4.20719e-29	66.64	42.26	310.54	283.09
chr2	38373423	38375289	1867	*	7.88758	6.61931	8.55192	-1.89885	2.0526e-31	4.2152e-29	107.65	88.98	386.24	364.37
chr6	158481742	158482619	878	*	7.70161	6.31764	8.39478	-2.03729	2.19728e-31	4.50518e-29	86.12	73.4	342.57	330.58
chr7	100323599	100325091	1493	*	7.38941	5.70699	8.14511	-2.3809	2.58527e-31	5.29234e-29	53.31	51.16	262.99	303.18
chr22	38220407	38221720	1314	*	8.01202	8.64647	6.8525	1.77079	2.64249e-31	5.40096e-29	385.49	415.96	125.19	105.93
chr1	14849245	14850393	1149	*	7.23695	5.42074	8.01602	-2.53076	2.78585e-31	5.68501e-29	38.96	46.71	262.02	255.7
chr2	237676511	237678587	2077	*	7.90614	6.6856	8.55771	-1.84428	2.82688e-31	5.75969e-29	103.55	102.32	375.56	378.07
chr7	50342980	50344493	1514	*	6.89861	7.75218	4.52556	3.10018	2.90276e-31	5.90501e-29	187.62	243.57	22.32	23.74
chr6	111408330	111409700	1371	*	7.13318	7.91938	5.27322	2.57595	3.05877e-31	6.21266e-29	231.7	252.47	41.73	35.62
chr11	416330	417746	1417	*	8.17891	8.77773	7.13651	1.62181	3.21753e-31	6.5249e-29	429.57	448.22	141.69	139.72
chr18	53806327	53808018	1692	*	7.23462	5.42074	8.01332	-2.52809	3.32457e-31	6.73145e-29	38.96	46.71	261.05	255.7
chr18	46521210	46522016	807	*	7.87225	6.62249	8.5317	-1.87815	3.55347e-31	7.18372e-29	102.52	94.54	379.45	360.72
chr19	708384	710650	2267	*	8.34007	8.91961	7.35621	1.54464	3.65318e-31	7.37379e-29	474.68	493.82	152.36	175.34
chr13	114631150	114632960	1811	*	8.63195	7.77364	9.16641	-1.38095	3.75984e-31	7.57731e-29	216.33	221.33	579.36	569.84
chr1	210056901	210058127	1227	*	7.26351	5.47586	8.03781	-2.50111	4.14281e-31	8.33616e-29	38.96	50.05	256.2	269.4
chr8	144852790	144854860	2071	*	7.67956	8.3673	6.3183	2.01631	4.17902e-31	8.39602e-29	330.13	330.32	89.28	70.32
chr8	144821549	144822849	1301	*	7.16286	7.94641	5.31931	2.5538	4.28849e-31	8.60264e-29	228.63	264.7	37.85	42.01
chr10	14115036	14116536	1501	*	7.72948	6.38354	8.4135	-1.99812	4.46825e-31	8.9494e-29	76.89	90.09	336.75	345.19
chr4	129161595	129162878	1284	*	7.32383	5.62072	8.08331	-2.40542	4.5974e-31	9.19389e-29	46.14	52.27	278.52	263.92
chr14	68676645	68677460	816	*	6.97252	4.76485	7.80725	-2.93567	4.67263e-31	9.32996e-29	27.68	26.69	225.14	222.82
chr6	135258469	135259527	1059	*	7.25825	5.48119	8.03074	-2.48132	4.90715e-31	9.78318e-29	48.19	41.15	259.11	263.92
chr10	72237573	72239228	1656	*	7.7548	8.43931	6.40683	1.9935	4.95121e-31	9.85587e-29	325	369.25	74.72	94.97
chr16	11726001	11727271	1271	*	8.41964	7.4695	8.98759	-1.50278	5.10117e-31	1.01388e-28	174.29	180.18	522.1	493.13
chr4	156312945	156314489	1545	*	7.43799	5.85185	8.17519	-2.27532	5.23906e-31	1.0397e-28	54.34	61.17	279.49	298.62
chr1	236146153	236147316	1164	*	6.94498	4.67839	7.7867	-2.9954	5.39352e-31	1.06872e-28	25.63	25.58	226.11	215.52
chr9	118453649	118455280	1632	*	7.30722	5.60174	8.06712	-2.40603	5.5647e-31	1.10095e-28	48.19	48.94	268.81	267.57
chr10	80561825	80563801	1977	*	8.48266	7.55791	9.04165	-1.46927	5.57375e-31	1.10107e-28	185.57	191.3	544.42	509.57
chr10	108184239	108186045	1807	*	7.43261	5.72108	8.19361	-2.41012	5.75478e-31	1.1351e-28	54.34	51.16	328.01	257.52
chr3	13323410	13324890	1481	*	6.9215	7.75002	4.76394	2.8814	5.81863e-31	1.14484e-28	221.45	209.09	23.29	31.05
chr5	367287	368536	1250	*	7.74522	6.42205	8.4236	-1.96655	5.82182e-31	1.14484e-28	89.2	82.3	340.63	346.1
chr3	71149921	71151293	1373	*	7.66034	6.2697	8.35509	-2.04541	5.84592e-31	1.14784e-28	82.02	72.29	327.04	327.84
chr20	50248134	50249197	1064	*	7.45079	5.88447	8.184	-2.24792	5.89385e-31	1.15551e-28	62.54	55.61	293.08	288.57
chr8	49331683	49333098	1416	*	7.46333	5.85488	8.20495	-2.29274	6.07624e-31	1.18947e-28	64.59	51.16	313.46	276.7
chr8	53477518	53478710	1193	*	7.27373	8.03041	5.58596	2.38602	6.37537e-31	1.24614e-28	247.08	275.82	49.49	46.57
chr13	42183877	42184688	812	*	6.92387	4.62199	7.76962	-3.03427	6.82165e-31	1.33137e-28	22.56	26.69	215.44	221
chr3	127780414	127781508	1095	*	7.16247	5.2849	7.95145	-2.59337	6.98669e-31	1.36153e-28	37.93	40.04	249.41	245.65
chr10	21461981	21463777	1797	*	7.87754	8.52228	6.68172	1.81445	7.05156e-31	1.37081e-28	364.98	370.36	105.78	99.54
chr8	124683481	124684511	1031	*	7.05601	4.95386	7.87738	-2.83048	7.06494e-31	1.37081e-28	29.73	32.25	216.41	253.87
chr12	94019105	94020234	1130	*	7.38897	5.76138	8.13431	-2.31596	7.06599e-31	1.37081e-28	58.44	50.05	284.34	277.61
chr6	135229326	135230509	1184	*	7.58745	6.13938	8.29541	-2.11507	7.40984e-31	1.43537e-28	68.69	72.29	326.07	302.27
chr4	16628881	16629785	905	*	7.05351	4.99295	7.86931	-2.77985	7.564e-31	1.46305e-28	35.88	27.8	233.88	233.78
chr6	16450864	16451924	1061	*	7.18931	5.33017	7.97537	-2.57788	7.63293e-31	1.47419e-28	34.86	45.6	250.38	252.96
chr10	127933530	127934528	999	*	7.22087	5.41193	7.99874	-2.51636	7.73842e-31	1.49234e-28	45.11	40.04	250.38	261.18
chr1	181103791	181105327	1537	*	8.5913	7.72108	9.13028	-1.39553	8.45875e-31	1.62884e-28	217.35	204.64	561.89	558.88
chr2	235359639	235360565	927	*	7.04724	5.00277	7.86084	-2.76968	8.51824e-31	1.63786e-28	30.76	33.37	233.88	231.04
chr5	31361267	31362613	1347	*	7.287	5.56963	8.04905	-2.41877	8.61324e-31	1.65368e-28	47.16	47.82	263.96	265.74
chr12	96820123	96821324	1202	*	7.99914	6.84641	8.63162	-1.75939	8.66458e-31	1.66096e-28	118.93	111.22	396.91	396.33
chr5	401024	401877	854	*	8.283	7.28369	8.86773	-1.56667	8.67678e-31	1.66096e-28	154.81	156.82	465.82	468.47
chr7	64407305	64408405	1101	*	7.06941	7.86029	5.17975	2.6059	9.08583e-31	1.7367e-28	237.86	226.89	36.88	35.62
chr22	44257295	44258848	1554	*	7.33189	8.07813	5.69967	2.32808	9.56953e-31	1.82647e-28	275.79	264.7	59.2	44.75
chr6	167031751	167032682	932	*	7.05957	5.00473	7.87459	-2.7811	9.67708e-31	1.84429e-28	29.73	34.48	247.46	221.91
chr12	65929432	65930529	1098	*	7.3133	5.59397	8.0757	-2.41545	9.76442e-31	1.8582e-28	54.34	42.26	276.58	263
chr20	52391510	52392817	1308	*	7.95705	6.77278	8.59855	-1.79893	9.91384e-31	1.88388e-28	109.7	109	401.77	373.5
chr16	11733545	11734299	755	*	7.47498	5.90951	8.20802	-2.254	1.06295e-30	2.01691e-28	51.26	68.96	303.75	287.66
chr2	19807344	19808148	805	*	6.87893	4.47979	7.73526	-3.12204	1.06553e-30	2.01885e-28	24.61	20.02	211.56	214.6
chr1	92047362	92048265	904	*	7.02922	4.91532	7.85213	-2.83184	1.08835e-30	2.05908e-28	35.88	24.47	232.91	229.21
chr1	161143047	161143852	806	*	6.93468	4.64672	7.77885	-3.0144	1.10257e-30	2.08296e-28	25.63	24.47	231.94	207.3
chr5	33787656	33788992	1337	*	7.15657	5.2658	7.94763	-2.607	1.19583e-30	2.25585e-28	36.91	40.04	258.14	235.61
chr3	124847367	124848565	1199	*	7.70625	6.37087	8.38767	-1.98292	1.21157e-30	2.28224e-28	80.99	84.53	332.86	336.97
chr2	95982788	95983667	880	*	7.52457	5.98229	8.25285	-2.21791	1.26155e-30	2.37294e-28	69.72	56.72	326.07	284.01
chr6	119860539	119862123	1585	*	7.31756	5.6092	8.07798	-2.40279	1.38077e-30	2.59343e-28	55.36	42.26	275.61	264.83
chr8	29609969	29610905	937	*	7.26597	5.52078	8.03295	-2.44874	1.41271e-30	2.64958e-28	45.11	46.71	272.7	251.13
chr7	2861818	2863037	1220	*	7.75553	6.43775	8.43257	-1.95863	1.47333e-30	2.75929e-28	93.3	80.08	335.78	355.24
chr6	3207799	3209310	1512	*	8.04232	6.86341	8.68231	-1.79075	1.47708e-30	2.76233e-28	126.1	106.77	382.36	439.25
chr6	151178942	151179938	997	*	7.55245	6.08945	8.26373	-2.12871	1.50868e-30	2.81737e-28	72.79	63.4	311.51	303.18
chr3	142681630	142683255	1626	*	7.68267	8.37129	6.31776	2.01358	1.55055e-30	2.8914e-28	308.6	353.68	72.78	86.75
chr1	27099578	27100401	824	*	7.4469	5.89693	8.17676	-2.22838	1.68654e-30	3.14047e-28	63.56	55.61	290.16	288.57
chr2	129165885	129167588	1704	*	7.91048	6.70532	8.55782	-1.82762	1.72582e-30	3.20901e-28	96.37	112.33	376.53	377.15
chr1	179112805	179113735	931	*	7.06971	5.07595	7.87617	-2.71748	1.81504e-30	3.37009e-28	30.76	36.7	240.67	229.21
chr6	132405071	132405914	844	*	7.19702	5.31449	7.98679	-2.59074	1.82952e-30	3.39211e-28	45.11	34.48	271.73	235.61
chr11	11416512	11417869	1358	*	7.06749	5.05575	7.87651	-2.73879	1.9108e-30	3.53775e-28	28.71	37.81	227.09	242.91
chr6	139917762	139919687	1926	*	7.78116	6.48189	8.45351	-1.93685	1.95108e-30	3.6072e-28	95.35	83.41	336.75	364.37
chr5	10551809	10553144	1336	*	8.38131	7.43109	8.94929	-1.50377	1.97893e-30	3.65102e-28	166.09	179.06	489.11	499.52
chr7	46426023	46427129	1107	*	6.8196	4.26254	7.6915	-3.27821	1.98041e-30	3.65102e-28	19.48	18.91	197	216.43
chr9	135521742	135522817	1076	*	7.1168	5.18334	7.91439	-2.65168	2.0382e-30	3.75223e-28	34.86	37.81	253.29	229.21
chr7	40848525	40849964	1440	*	6.75698	3.9116	7.65295	-3.5571	2.05732e-30	3.78206e-28	12.3	17.8	197.97	204.56
chr2	46561116	46561790	675	*	7.20193	5.40189	7.97831	-2.51088	2.14178e-30	3.93176e-28	38.96	45.6	252.32	252.04
chr7	143632367	143633233	867	*	6.88547	4.47133	7.74335	-3.12915	2.14889e-30	3.93924e-28	27.68	16.68	221.26	207.3
chr4	153179629	153180990	1362	*	7.35141	5.71989	8.09751	-2.32042	2.36971e-30	4.33554e-28	55.36	50.05	276.58	271.22
chr2	47109564	47110358	795	*	7.70458	6.36495	8.38705	-1.98987	2.37176e-30	4.33554e-28	75.87	88.98	328.01	341.54
chr9	139843783	139845457	1675	*	8.52995	9.08001	7.62987	1.43731	2.3754e-30	4.33608e-28	521.85	560.55	213.5	182.64
chr1	198637202	198638165	964	*	6.92522	4.68573	7.76376	-2.97105	2.56209e-30	4.67031e-28	22.56	28.92	216.41	218.26
chr5	83679420	83680986	1567	*	6.87622	7.70525	4.71461	2.88349	2.66159e-30	4.84487e-28	206.07	211.32	23.29	29.22
chr9	214451	215551	1101	*	7.16435	7.93457	5.40051	2.46546	2.75883e-30	5.01485e-28	236.83	252.47	38.82	45.66
chr15	39764581	39767104	2524	*	8.41134	7.47191	8.97553	-1.48802	2.7847e-30	5.05479e-28	180.44	174.61	487.17	519.61
chr11	2812476	2813668	1193	*	7.50284	8.20665	6.0731	2.09326	2.85785e-30	5.18033e-28	298.34	292.51	68.9	65.75
chr6	11771374	11772514	1141	*	7.5709	6.13314	8.27654	-2.09873	3.01066e-30	5.44971e-28	75.87	64.51	311.51	308.66
chr2	113976315	113977962	1648	*	7.5636	6.10574	8.27374	-2.12633	3.06399e-30	5.53852e-28	67.67	70.07	291.13	327.84
chr8	49447557	49449493	1937	*	7.45696	5.90219	8.18781	-2.2375	3.0868e-30	5.572e-28	58.44	61.17	272.7	310.49
chr17	39066478	39067678	1201	*	7.25885	5.5368	8.02174	-2.42242	3.13454e-30	5.65031e-28	46.14	46.71	265.9	253.87
chr3	2139973	2141715	1743	*	6.73531	7.69633	2.50579	4.71195	3.15742e-30	5.68366e-28	210.17	204.64	6.79	4.57
chr12	4382926	4384572	1647	*	7.53093	8.23356	6.10636	2.0888	3.28173e-30	5.89926e-28	298.34	303.63	75.7	62.1
chr16	84868977	84869540	564	*	6.93417	4.68573	7.77376	-2.98013	3.32573e-30	5.97007e-28	22.56	28.92	205.74	231.95
chr17	36829720	36831656	1937	*	8.78487	9.2935	7.99229	1.29034	3.39596e-30	6.08773e-28	597.71	657.31	258.14	251.13
chr11	9965591	9966883	1293	*	6.74013	3.73739	7.6472	-3.69151	3.42765e-30	6.13606e-28	13.33	13.35	186.33	214.6
chr8	11747575	11749176	1602	*	7.37697	5.76946	8.1184	-2.29713	3.55259e-30	6.35096e-28	51.26	57.83	288.22	267.57
chr5	172159100	172161272	2173	*	9.25355	8.59248	9.70519	-1.10518	3.64174e-30	6.50139e-28	391.64	380.37	869.52	799.97
chr6	444915	446758	1844	*	6.68721	7.56382	4.07858	3.32307	3.68845e-30	6.57572e-28	180.44	197.97	15.53	18.26
chr4	170304038	170304835	798	*	6.72641	3.69059	7.63566	-3.72916	3.77438e-30	6.71969e-28	10.25	15.57	194.09	203.64
chr6	52430947	52431686	740	*	7.41199	5.8475	8.14483	-2.24578	4.10261e-30	7.29404e-28	58.44	56.72	292.11	273.96
chr1	50884211	50885365	1155	*	7.0534	7.86385	5.0315	2.73486	4.30468e-30	7.64283e-28	211.2	254.69	25.23	40.18
chr1	164748876	164750291	1416	*	7.80057	6.54138	8.46253	-1.8883	4.39812e-30	7.79807e-28	98.42	87.86	349.36	356.15
chr20	34470342	34471975	1634	*	8.09866	7.00755	8.71276	-1.68423	4.42205e-30	7.8298e-28	126.1	131.24	400.8	438.34
chr20	39862208	39863544	1337	*	7.5265	5.97533	8.25662	-2.22362	4.48175e-30	7.9247e-28	76.89	48.94	306.66	305.01
chr8	143896417	143898124	1708	*	7.89723	6.70879	8.5399	-1.80432	4.50575e-30	7.9563e-28	103.55	105.66	373.62	370.76
chr7	73894506	73895419	914	*	8.33517	7.36305	8.91071	-1.53193	4.62596e-30	8.15747e-28	156.86	172.39	495.9	466.65
chr19	16174983	16176066	1084	*	7.30983	5.62454	8.06605	-2.38605	4.66216e-30	8.21014e-28	43.06	55.61	277.55	258.44
chr5	174263395	174264863	1469	*	6.93002	4.73503	7.76319	-2.91859	4.67773e-30	8.2264e-28	27.68	25.58	213.5	221
chr22	17081885	17083534	1650	*	7.20457	7.96178	5.5139	2.38836	4.74593e-30	8.33504e-28	245.03	253.58	47.55	43.83
chr3	111792592	111794719	2128	*	7.4784	5.90301	8.21344	-2.2518	4.80518e-30	8.4277e-28	70.74	48.94	310.54	283.09
chr9	91890131	91891216	1086	*	6.95752	4.79632	7.7865	-2.88787	4.8251e-30	8.45122e-28	26.66	28.92	209.62	231.95
chr15	76014614	76016276	1663	*	8.0886	7.00032	8.70182	-1.6798	4.88341e-30	8.54182e-28	128.15	127.9	401.77	431.03
chr11	69588841	69590678	1838	*	6.58992	7.51469	3.29116	3.94054	5.39481e-30	9.42363e-28	185.57	180.18	6.79	12.78
chr1	3567984	3569417	1434	*	6.93378	7.74401	4.91353	2.74144	5.58912e-30	9.74994e-28	216.33	212.43	31.05	29.22
chr2	233283225	233284715	1491	*	7.29088	8.03366	5.67648	2.30002	5.62954e-30	9.80726e-28	259.38	264.7	46.58	55.71
chr7	22605171	22606096	926	*	7.6397	6.24958	8.33433	-2.04291	5.64307e-30	9.81765e-28	80.99	71.18	338.69	306.84
chr8	29593976	29594974	999	*	7.09579	5.17815	7.89098	-2.63108	5.68065e-30	9.86981e-28	37.93	34.48	230	244.74
chr2	86563857	86565084	1228	*	7.12463	7.91969	5.20785	2.62521	5.75074e-30	9.97823e-28	217.35	266.93	30.08	43.83
chr2	72058531	72059620	1090	*	7.3075	5.57885	8.07156	-2.43595	5.76006e-30	9.97857e-28	39.98	55.61	250.38	287.66
chr20	49975665	49977053	1389	*	7.64267	6.23484	8.34144	-2.06171	5.76631e-30	9.97857e-28	86.12	64.51	315.4	333.32
chr17	77786490	77787804	1315	*	8.29593	8.87503	7.31338	1.54334	5.86822e-30	1.01414e-27	441.88	497.15	160.12	157.98
chr2	100937654	100939129	1476	*	7.40848	8.13703	5.8649	2.22057	6.02666e-30	1.04014e-27	259.38	303.63	56.29	60.27
chr8	143591713	143593160	1448	*	6.81715	7.65439	4.58854	2.95654	6.03593e-30	1.04035e-27	206.07	196.86	26.2	21.92
chr7	993270	994748	1479	*	7.78525	8.44781	6.52376	1.89006	6.1397e-30	1.05683e-27	329.1	369.25	85.4	98.63
chr10	17258613	17259641	1029	*	7.86041	6.60096	8.52243	-1.88572	6.1832e-30	1.06291e-27	110.73	83.41	361.01	374.41
chr11	2187525	2188401	877	*	6.78739	7.63623	4.45783	3.04826	6.2697e-30	1.07636e-27	199.92	197.97	17.47	26.48
chr16	11452013	11453008	996	*	7.492	5.99591	8.21052	-2.16535	6.33734e-30	1.08653e-27	68.69	58.95	305.69	286.75
chr2	129064232	129065100	869	*	7.67708	6.34226	8.35836	-1.98072	6.60782e-30	1.13141e-27	79.97	82.3	336.75	319.62
chr11	9926209	9927575	1367	*	7.06655	4.96352	7.88804	-2.81645	6.67961e-30	1.1422e-27	37.93	24.47	260.08	213.69
chr19	622821	623943	1123	*	7.6613	6.30834	8.34702	-1.99925	6.78738e-30	1.1591e-27	85.09	73.4	327.04	324.19
chr4	13892732	13893780	1049	*	7.3446	5.72701	8.088	-2.30849	6.86198e-30	1.1703e-27	49.21	56.72	277.55	266.66
chr11	126863088	126863659	572	*	6.98631	4.85944	7.81091	-2.85816	6.89214e-30	1.1739e-27	23.58	34.48	213.5	235.61
chr19	1285421	1286845	1425	*	7.50009	8.20398	6.07003	2.0905	6.90804e-30	1.17506e-27	285.02	304.74	64.05	70.32
chr2	68144645	68146188	1544	*	7.69002	6.33529	8.37618	-2.00075	6.92924e-30	1.17713e-27	89.2	72.29	320.25	344.28
chr8	101911285	101912739	1455	*	7.95272	6.79958	8.58531	-1.75934	7.08328e-30	1.20055e-27	113.8	109	390.12	378.07
chr11	18812589	18814101	1513	*	6.74171	7.61197	4.20231	3.26022	7.08563e-30	1.20055e-27	173.27	217.99	20.38	16.44
chr22	40906071	40907124	1054	*	7.09797	5.20355	7.8896	-2.60875	7.13769e-30	1.2078e-27	35.88	37.81	237.76	236.52
chr3	197120240	197121548	1309	*	7.45887	5.94778	8.1806	-2.18345	7.26241e-30	1.2273e-27	65.62	57.83	285.31	294.97
chr14	62020785	62022328	1544	*	7.83821	6.6188	8.48947	-1.8428	7.40466e-30	1.24971e-27	95.35	101.21	358.1	360.72
chr17	36032102	36033156	1055	*	7.28672	5.61561	8.04031	-2.36479	8.00466e-30	1.34922e-27	50.24	47.82	256.2	270.31
chr1	65398952	65400801	1850	*	8.10398	7.03792	8.71031	-1.65213	8.88275e-30	1.49529e-27	127.13	135.69	423.12	414.6
chr2	105991861	105992808	948	*	7.27606	5.56036	8.03781	-2.40896	9.23929e-30	1.55329e-27	54.34	40.04	256.2	269.4
chr21	36930380	36931513	1134	*	6.91747	4.70218	7.75312	-2.93481	9.34383e-30	1.56883e-27	28.71	23.36	224.17	207.3
chr16	52579599	52581593	1995	*	6.87645	7.69839	4.77	2.82926	9.39435e-30	1.57528e-27	216.33	199.08	27.17	27.4
chr5	121464159	121465091	933	*	6.88321	4.59424	7.7275	-3.01976	9.65464e-30	1.61684e-27	20.5	27.8	203.79	220.08
chr10	126028796	126029701	906	*	7.67059	6.3339	8.35233	-1.98339	9.72546e-30	1.6266e-27	77.92	83.41	336.75	316.88
chr12	65919470	65920469	1000	*	6.98318	4.89272	7.80301	-2.80692	9.78585e-30	1.63459e-27	33.83	25.58	218.35	228.3
chr11	15178508	15180336	1829	*	7.64185	6.27845	8.3301	-2.01104	1.01482e-29	1.69294e-27	84.07	71.18	322.19	321.45
chr1	151810373	151811726	1354	*	7.93144	8.58006	6.72165	1.8262	1.04459e-29	1.74036e-27	351.66	413.74	95.1	115.98
chr6	158137063	158137642	580	*	7.24275	5.51256	8.00709	-2.42558	1.09019e-29	1.81401e-27	51.26	40.04	254.26	260.26
chr18	3602803	3605221	2419	*	8.90991	8.14692	9.40635	-1.24774	1.12594e-29	1.87109e-27	305.52	261.37	667.67	689.47
chr15	80771784	80773334	1551	*	7.74455	6.4688	8.41084	-1.90963	1.15059e-29	1.90962e-27	88.17	88.98	346.45	334.23
chr6	37212879	37213533	655	*	7.1887	5.41045	7.9614	-2.47933	1.15701e-29	1.91781e-27	46.14	38.93	245.52	252.96
chr17	79761242	79762967	1726	*	7.25971	8.00677	5.62318	2.32541	1.16851e-29	1.9344e-27	268.61	245.8	45.61	52.97
chr19	6075464	6076697	1234	*	8.02556	6.92217	8.64341	-1.69937	1.24072e-29	2.05132e-27	116.88	125.68	398.85	400.9
chr11	114005796	114006655	860	*	6.90326	4.60405	7.74871	-3.0145	1.2697e-29	2.09657e-27	29.73	18.91	201.85	228.3
chr9	137704066	137704716	651	*	7.04315	5.01017	7.85516	-2.74293	1.30007e-29	2.14399e-27	39.98	24.47	233.88	229.21
chr7	47493687	47494803	1117	*	7.90222	6.73103	8.54001	-1.78282	1.33181e-29	2.19355e-27	104.57	107.88	374.59	369.85
chr13	49793975	49795562	1588	*	7.7055	8.36825	6.44326	1.89285	1.36668e-29	2.24814e-27	325	335.88	86.37	87.67
chr2	239543109	239544305	1197	*	7.62705	6.27214	8.31325	-2.00304	1.37201e-29	2.25403e-27	78.94	75.63	319.28	316.88
chr22	44918567	44920520	1954	*	7.85537	6.60483	8.51503	-1.87588	1.41871e-29	2.32782e-27	104.57	90.09	390.12	341.54
chr2	131594176	131595335	1160	*	7.12462	7.90533	5.29853	2.52896	1.44698e-29	2.3712e-27	221.45	258.03	33.97	44.75
chr8	12989147	12990784	1638	*	8.93324	8.19959	9.41724	-1.21038	1.45647e-29	2.38375e-27	279.89	308.08	687.08	680.34
chr4	122706414	122707227	814	*	6.93452	4.71895	7.7702	-2.94549	1.52642e-29	2.49508e-27	21.53	31.14	233.88	202.73
chr15	96589205	96591063	1859	*	7.56647	6.13671	8.27029	-2.08992	1.73878e-29	2.83862e-27	71.77	68.96	328.01	289.49
chr6	134767778	134768931	1154	*	7.04497	5.07223	7.84839	-2.68964	1.76222e-29	2.87328e-27	32.81	34.48	243.58	217.34
chr1	17025954	17026756	803	*	6.82689	7.65532	4.67004	2.8813	1.76565e-29	2.87526e-27	203	200.2	27.17	23.74
chr19	6070371	6071051	681	*	7.02087	4.98745	7.83294	-2.75968	1.78777e-29	2.90764e-27	25.63	37.81	237.76	218.26
chr16	70736210	70737041	832	*	8.13507	7.07595	8.73921	-1.64494	1.80293e-29	2.92773e-27	123.03	146.81	431.85	422.81
chr21	47238745	47240550	1806	*	7.27507	5.61561	8.02648	-2.35071	1.80464e-29	2.92773e-27	50.24	47.82	263.96	257.52
chr8	49814800	49816183	1384	*	7.21111	5.47021	7.97734	-2.44203	1.81008e-29	2.9329e-27	43.06	45.6	262.02	242
chr1	112276215	112277224	1010	*	7.63889	6.28811	8.32408	-2.00166	1.91077e-29	3.09218e-27	71.77	84.53	323.16	317.8
chr10	3580928	3582495	1568	*	7.88909	6.67054	8.54012	-1.84085	1.93759e-29	3.13168e-27	102.52	101.21	344.51	399.98
chr1	92294987	92296784	1798	*	7.4353	5.92568	8.15671	-2.18239	1.9886e-29	3.21013e-27	61.51	60.06	294.05	276.7
chr1	118380102	118381490	1389	*	6.79673	4.34071	7.65888	-3.17494	2.01984e-29	3.25651e-27	20.5	20.02	210.59	193.6
chr20	590116	590997	882	*	6.59226	7.49336	3.67652	3.6125	2.04949e-29	3.30021e-27	170.19	190.19	15.53	10.05
chr1	112275257	112276111	855	*	7.2456	5.54997	8.00372	-2.38999	2.10571e-29	3.38654e-27	49.21	44.49	249.41	263.92
chr12	96838939	96841105	2167	*	7.5849	6.19844	8.27866	-2.03846	2.11027e-29	3.3868e-27	77.92	68.96	311.51	309.58
chr3	99928581	99929710	1130	*	6.97739	4.8906	7.79673	-2.80062	2.1132e-29	3.3868e-27	34.86	24.47	216.41	228.3
chr8	124624610	124626804	2195	*	7.55534	6.12076	8.26025	-2.09261	2.1137e-29	3.3868e-27	76.89	62.28	317.34	295.88
chr4	44449091	44450971	1881	*	6.69878	7.5658	4.1933	3.21935	2.21503e-29	3.54479e-27	174.29	204.64	16.5	20.09
chr5	111333756	111335104	1349	*	7.15746	5.31133	7.94143	-2.54801	2.24447e-29	3.58747e-27	47.16	32.25	237.76	253.87
chr1	245951059	245951696	638	*	6.87454	4.61689	7.71522	-2.97976	2.27277e-29	3.62824e-27	24.61	24.47	220.29	199.99
chr3	123453241	123454014	774	*	7.2132	5.47586	7.97881	-2.44193	2.28421e-29	3.64202e-27	38.96	50.05	255.23	249.31
chr17	38707725	38708223	499	*	7.17273	5.31797	7.95809	-2.57407	2.35778e-29	3.75471e-27	29.73	50.05	241.64	255.7
chr17	9132979	9134971	1993	*	7.95246	6.81168	8.58145	-1.74264	2.51042e-29	3.99289e-27	117.9	106.77	386.24	379.89
chr17	77178478	77180134	1657	*	6.60198	7.48917	3.86914	3.4403	2.54469e-29	4.04244e-27	182.49	176.84	15.53	13.7
chr6	89826990	89828189	1200	*	7.98474	8.60193	6.88351	1.69409	3.27928e-29	5.20304e-27	371.14	405.95	117.42	118.72
chr22	21909579	21911445	1867	*	7.6371	6.30057	8.3188	-1.98034	3.44715e-29	5.46269e-27	82.02	75.63	314.43	324.19
chr6	106055661	106056967	1307	*	7.71467	6.4321	8.38274	-1.91687	3.51459e-29	5.56278e-27	88.17	84.53	325.1	342.45
chr17	81108176	81109595	1420	*	7.81325	6.5998	8.46288	-1.83285	3.57299e-29	5.64833e-27	99.45	94.54	352.27	353.41
chr7	34019943	34021069	1127	*	7.3068	5.69034	8.04998	-2.30115	3.6096e-29	5.69926e-27	54.34	48.94	269.78	260.26
chr7	134427152	134427988	837	*	6.9702	4.92361	7.78409	-2.7628	3.70698e-29	5.84591e-27	31.78	28.92	228.06	212.78
chrX	627107	628365	1259	*	7.38389	5.80308	8.12002	-2.26952	3.76057e-29	5.92321e-27	47.16	64.51	267.84	288.57
chr2	238213727	238215624	1898	*	7.55934	6.16197	8.25568	-2.05424	3.83177e-29	6.02805e-27	68.69	74.52	315.4	295.88
chr12	91447106	91448975	1870	*	6.83636	4.4295	7.69349	-3.13714	3.87661e-29	6.08772e-27	16.4	26.69	191.18	222.82
chr21	35916506	35918333	1828	*	7.97356	6.78499	8.61628	-1.79862	3.87908e-29	6.08772e-27	127.13	93.42	378.48	406.38
chr5	9014299	9015594	1296	*	7.07974	5.17815	7.87247	-2.61202	3.99355e-29	6.2598e-27	37.93	34.48	220.29	248.39
chr7	132549827	132551793	1967	*	7.44062	5.93369	8.16146	-2.17592	4.00024e-29	6.26271e-27	66.64	55.61	295.02	277.61
chr1	42845862	42847006	1145	*	7.12099	7.89315	5.3459	2.48184	4.01325e-29	6.27551e-27	229.65	245.8	47.55	33.79
chr9	38423502	38424739	1238	*	7.40069	8.11445	5.92646	2.14358	4.08038e-29	6.3728e-27	270.66	283.61	65.02	56.62
chr15	39561817	39563309	1493	*	7.45759	5.98922	8.17006	-2.13585	4.0964e-29	6.39014e-27	62.54	64.51	291.13	284.92
chr11	17034696	17036441	1746	*	7.61866	8.30672	6.25606	2.00845	4.34865e-29	6.77549e-27	296.29	337	67.93	84.93
chr7	129418583	129420075	1493	*	7.54259	8.23414	6.16547	2.02732	4.5346e-29	7.05673e-27	308.6	293.62	65.02	78.54
chr15	102028713	102030516	1804	*	7.74885	8.43083	6.41118	1.9787	4.73846e-29	7.36516e-27	359.86	330.32	67.93	102.28
chr5	134727018	134728020	1003	*	7.569	6.18919	8.26119	-2.03091	4.75771e-29	7.38624e-27	75.87	70.07	308.6	305.01
chr20	62129123	62130950	1828	*	7.78919	8.46228	6.48706	1.93739	5.05618e-29	7.84022e-27	311.67	393.72	84.43	94.97
chr1	31143280	31144380	1101	*	7.08373	5.19195	7.87494	-2.6099	5.06531e-29	7.845e-27	29.73	43.38	233.88	235.61
chr2	47083226	47084146	921	*	7.84084	6.64546	8.48545	-1.81002	5.10873e-29	7.90282e-27	104.57	95.65	355.18	361.63
chr1	8455390	8456629	1240	*	7.17621	5.37103	7.95345	-2.51636	5.22783e-29	8.07743e-27	33.83	48.94	261.05	234.69
chr12	13131290	13132659	1370	*	7.70981	6.3995	8.38496	-1.94583	5.24896e-29	8.10043e-27	94.32	74.52	342.57	326.01
chr8	26495414	26496505	1092	*	7.65952	6.35212	8.33394	-1.9476	5.52888e-29	8.52229e-27	79.97	83.41	320.25	325.1
chr2	129057718	129058982	1265	*	8.07576	6.97763	8.69201	-1.69521	5.61937e-29	8.6515e-27	109.7	142.36	414.38	412.77
chr2	158029495	158031343	1849	*	7.29669	5.67717	8.04047	-2.30511	5.77992e-29	8.88814e-27	52.29	50.05	272.7	253.87
chr8	141728914	141729711	798	*	6.91106	4.7918	7.73467	-2.8377	6.0126e-29	9.23499e-27	28.71	26.69	208.65	217.34
chr17	17479351	17480851	1501	*	8.01597	6.92113	8.63121	-1.68704	6.07022e-29	9.31248e-27	118.93	123.45	408.56	384.46
chr8	135173788	135176098	2311	*	8.21609	7.19057	8.80946	-1.60063	6.421e-29	9.83899e-27	135.33	156.82	473.58	423.73
chr5	123035146	123036302	1157	*	7.0626	5.12956	7.86013	-2.6397	6.53479e-29	1.00015e-26	39.98	30.03	245.52	219.17
chr8	99190097	99191528	1432	*	7.60115	6.10137	8.32046	-2.17678	6.57707e-29	1.00544e-26	59.46	77.85	280.46	358.89
chr2	45552	47194	1643	*	6.64143	7.5998	2.50579	4.61958	7.05867e-29	1.07779e-26	198.9	189.07	6.79	4.57
chr5	80716498	80717418	921	*	6.93868	4.76946	7.76867	-2.89286	7.15291e-29	1.0909e-26	25.63	28.92	195.06	241.09
chr19	41221843	41223595	1753	*	8.89657	8.15626	9.38342	-1.21614	7.24839e-29	1.10416e-26	301.42	269.15	676.4	659.33
chr1	66958436	66959493	1058	*	6.86034	4.64922	7.69548	-2.93274	7.42672e-29	1.13e-26	24.61	25.58	200.88	213.69
chr2	218560037	218561091	1055	*	7.16173	5.40337	7.93101	-2.46311	7.56864e-29	1.15025e-26	37.93	46.71	239.7	248.39
chr16	48478223	48479709	1487	*	7.2728	5.64797	8.01761	-2.31207	7.72441e-29	1.17255e-26	50.24	50.05	256.2	262.09
chr9	112259892	112261205	1314	*	8.09859	8.71829	6.98905	1.70341	7.7802e-29	1.17855e-26	375.24	467.12	127.13	126.94
chr5	17157224	17158048	825	*	6.90651	4.75791	7.7339	-2.8633	7.78212e-29	1.17855e-26	30.76	23.36	204.76	221
chr16	71061238	71062501	1264	*	7.64119	6.32313	8.31829	-1.95948	7.80316e-29	1.18036e-26	78.94	81.19	326.07	312.32
chr16	87491691	87492793	1103	*	7.85743	6.64909	8.50565	-1.82345	8.15511e-29	1.23216e-26	111.75	88.98	356.15	370.76
chr17	80970280	80971958	1679	*	8.17058	7.15724	8.75997	-1.58521	8.21391e-29	1.2396e-26	135.33	150.15	425.06	441.99
chr12	33049266	33050350	1085	*	6.53866	7.44417	3.55914	3.66225	8.28938e-29	1.24954e-26	181.47	166.83	12.62	10.96
chr6	112544658	112545804	1147	*	7.16109	5.40189	7.93051	-2.46235	8.39792e-29	1.26443e-26	38.96	45.6	252.32	235.61
chr7	94536556	94538115	1560	*	8.17948	8.76974	7.16347	1.58475	8.49264e-29	1.27721e-26	408.04	464.9	138.77	147.94
chr12	25767225	25768711	1487	*	6.83217	4.55531	7.67508	-2.99918	8.69945e-29	1.3068e-26	22.56	24.47	195.06	213.69
chr3	187347991	187348920	930	*	6.75063	4.22012	7.62004	-3.243	8.92777e-29	1.3384e-26	19.48	17.8	183.41	210.04
chr20	61339731	61340802	1072	*	6.82467	7.64647	4.71932	2.82336	8.93045e-29	1.3384e-26	192.74	207.98	26.2	26.48
chr5	76652823	76654333	1511	*	7.17901	5.45486	7.94227	-2.42406	9.38977e-29	1.40562e-26	41.01	46.71	242.61	249.31
chr2	211089381	211090310	930	*	7.02615	7.80649	5.20231	2.53264	9.80082e-29	1.46546e-26	228.63	219.1	40.76	32.88
chr7	35293061	35294589	1529	*	6.55348	7.44849	3.72089	3.52662	9.89104e-29	1.47725e-26	169.16	180.18	13.59	12.78
chr11	76784529	76786255	1727	*	8.42174	7.50665	8.97726	-1.45685	9.94292e-29	1.48329e-26	170.19	193.52	523.07	484.91
chr2	127932352	127935119	2768	*	9.12383	8.45457	9.57924	-1.116	1.00689e-28	1.50036e-26	369.09	332.55	763.74	766.18
chr4	15894483	15895526	1044	*	6.91548	4.78271	7.74085	-2.84439	1.05962e-28	1.57713e-26	32.81	22.24	208.65	219.17
chr4	40318518	40319713	1196	*	7.5126	6.10665	8.21093	-2.0638	1.07964e-28	1.60508e-26	66.64	71.18	293.08	299.53
chr9	132523514	132524798	1285	*	7.37906	5.80957	8.11292	-2.25001	1.09571e-28	1.62711e-26	54.34	57.83	298.9	254.78
chr5	135527252	135529018	1767	*	7.63843	8.31761	6.31208	1.96693	1.12071e-28	1.66233e-26	292.19	345.89	77.64	81.28
chr2	110062469	110063577	1109	*	7.50023	6.0548	8.20759	-2.11301	1.14867e-28	1.70185e-26	58.44	74.52	285.31	305.92
chr12	79816222	79817735	1514	*	7.39008	5.85402	8.11706	-2.21601	1.16529e-28	1.72452e-26	52.29	63.4	263.96	291.31
chr15	80872735	80873850	1116	*	7.45078	5.97554	8.16477	-2.14157	1.1776e-28	1.74074e-26	63.56	62.28	301.81	272.14
chr21	36179476	36181715	2240	*	8.62468	7.80901	9.14257	-1.32286	1.21036e-28	1.78713e-26	219.4	229.11	554.13	576.23
chr2	69470385	69471363	979	*	6.90843	4.77634	7.7337	-2.85837	1.25829e-28	1.85417e-26	22.56	32.25	203.79	221.91
chr1	183247614	183249358	1745	*	8.45593	7.57806	8.99778	-1.40597	1.25862e-28	1.85417e-26	188.64	193.52	520.16	502.26
chr2	85034535	85035283	749	*	7.14668	5.39445	7.9149	-2.44983	1.27702e-28	1.87914e-26	44.09	40.04	240.67	242
chr7	73313828	73315301	1474	*	8.1347	7.10164	8.73052	-1.60616	1.30561e-28	1.91903e-26	144.56	130.13	437.67	411.86
chr17	19482658	19484073	1416	*	7.66488	8.32524	6.41168	1.88092	1.31485e-28	1.93043e-26	317.82	323.65	84.43	85.84
chr8	42078766	42079737	972	*	7.27333	5.66264	8.01539	-2.2953	1.35205e-28	1.98115e-26	51.26	50.05	258.14	259.35
chr8	144814842	144816533	1692	*	8.65643	9.18004	7.82625	1.3431	1.35245e-28	1.98115e-26	562.86	597.25	248.43	205.47
chr10	126027700	126028532	833	*	7.19003	5.4854	7.94978	-2.39973	1.35689e-28	1.98542e-26	45.11	44.49	239.7	254.78
chr2	151536661	151538061	1401	*	7.27706	5.63314	8.02553	-2.33374	1.39994e-28	2.04611e-26	49.21	50.05	242.61	278.53
chr9	73027253	73028901	1649	*	9.46003	8.88884	9.86812	-0.974884	1.41592e-28	2.06713e-26	466.48	481.58	940.37	928.73
chr17	42172700	42174658	1959	*	8.69732	7.88505	9.21386	-1.31675	1.42615e-28	2.07972e-26	234.78	238.01	626.91	560.71
chr5	178733560	178734450	891	*	7.63416	6.32313	8.30949	-1.95085	1.43583e-28	2.09149e-26	78.94	81.19	322.19	312.32
chr7	134132559	134134064	1506	*	7.61303	6.277	8.29461	-1.98275	1.44485e-28	2.10228e-26	72.79	82.3	304.72	323.27
chr1	144009631	144010918	1288	*	7.96341	6.84009	8.58724	-1.72528	1.51875e-28	2.20733e-26	104.57	124.57	376.53	392.68
chr2	237551531	237552969	1439	*	8.02795	6.9578	8.63556	-1.65526	1.52493e-28	2.21383e-26	124.05	124.57	402.74	392.68
chr2	191915352	191916677	1326	*	7.3464	5.80733	8.07401	-2.21499	1.54115e-28	2.23487e-26	56.39	55.61	265.9	273.05
chr14	90377586	90378960	1375	*	7.5688	6.2061	8.25689	-2.01402	1.55619e-28	2.25417e-26	68.69	78.97	308.6	303.18
chr5	55574576	55575917	1342	*	7.35975	5.8357	8.08421	-2.19857	1.68266e-28	2.43464e-26	56.39	57.83	268.81	273.96
chr5	172328879	172329629	751	*	7.89889	6.72108	8.53857	-1.78918	1.68611e-28	2.43691e-26	108.68	102.32	346.45	397.24
chr8	143781496	143782922	1427	*	8.60359	7.78653	9.12202	-1.32336	1.73179e-28	2.50016e-26	222.48	219.1	561.89	552.49
chr16	57033266	57035212	1947	*	8.39244	7.49502	8.94152	-1.43207	1.77983e-28	2.56666e-26	178.39	182.4	492.02	491.3
chr15	31315274	31316590	1317	*	7.19165	5.4617	7.95594	-2.42207	1.82597e-28	2.63028e-26	49.21	38.93	260.08	236.52
chr15	94805878	94807831	1954	*	7.61632	6.27764	8.29854	-1.97956	1.91697e-28	2.75829e-26	85.09	70.07	318.31	311.4
chr3	55222917	55223535	619	*	6.96492	4.94371	7.77528	-2.73065	1.92737e-28	2.77018e-26	34.86	26.69	229.03	209.12
chr10	10866716	10867888	1173	*	7.23157	5.58643	7.98027	-2.33459	1.97227e-28	2.83158e-26	47.16	48.94	248.43	256.61
chr4	184268668	184270150	1483	*	7.48863	6.06307	8.19148	-2.08758	2.04186e-28	2.92826e-26	62.54	71.18	282.4	302.27
chr20	61050045	61051864	1820	*	7.0979	7.859	5.38582	2.40586	2.04869e-28	2.93217e-26	229.65	234.67	39.79	43.83
chr2	30888066	30889344	1279	*	8.02861	6.91895	8.64834	-1.70073	2.04911e-28	2.93217e-26	136.36	105.66	398.85	403.64
chr14	96734209	96736208	2000	*	8.04891	6.96233	8.66162	-1.67915	2.13939e-28	3.05799e-26	114.83	134.58	385.27	424.64
chr1	17305488	17307974	2487	*	9.10307	8.44	9.55564	-1.10988	2.15196e-28	3.07256e-26	334.23	360.35	745.3	759.79
chr1	99931386	99932360	975	*	6.73624	4.27231	7.59918	-3.18437	2.15837e-28	3.07833e-26	16.4	22.24	196.03	191.77
chr19	3784719	3786540	1822	*	6.89296	7.69398	4.93658	2.66984	2.21488e-28	3.15546e-26	205.05	209.09	32.02	29.22
chr11	128585307	128587146	1840	*	7.45475	6.00842	8.16232	-2.10637	2.23575e-28	3.1817e-26	68.69	60.06	285.31	287.66
chr11	46270343	46271376	1034	*	7.55959	6.20014	8.24689	-2.00657	2.27498e-28	3.23399e-26	75.87	71.18	298.9	308.66
chr14	35852946	35853739	794	*	7.55105	6.09201	8.26146	-2.11571	2.32923e-28	3.30749e-26	83.04	53.39	310.54	303.18
chr19	51170518	51172165	1648	*	7.19009	7.93759	5.55124	2.32304	2.49113e-28	3.53351e-26	237.86	252.47	41.73	52.05
chr12	64310532	64311734	1203	*	7.41691	5.95082	8.12888	-2.13107	2.50949e-28	3.55567e-26	62.54	61.17	279.49	280.35
chr2	36882951	36884146	1196	*	6.91422	4.84641	7.731	-2.78221	2.5128e-28	3.55647e-26	29.73	27.8	221.26	203.64
chr14	100222898	100223508	611	*	7.22291	5.56567	7.9739	-2.34425	2.60449e-28	3.68223e-26	50.24	44.49	257.17	245.65
chr16	69951067	69953018	1952	*	8.22969	7.26458	8.80283	-1.5211	2.62872e-28	3.70873e-26	150.71	156.82	450.29	442.9
chr2	208104427	208105669	1243	*	7.32508	5.75467	8.05912	-2.25132	2.62895e-28	3.70873e-26	51.26	56.72	280.46	252.96
chr22	45606015	45607054	1040	*	7.62838	6.28104	8.31273	-1.99731	2.63396e-28	3.71177e-26	67.67	87.86	330.92	305.01
chr3	13554102	13556004	1903	*	8.23597	7.27174	8.80881	-1.51837	2.64429e-28	3.72229e-26	158.91	150.15	451.26	445.64
chr3	194286593	194287674	1082	*	7.17971	5.4882	7.93707	-2.38619	2.70403e-28	3.80226e-26	43.06	46.71	243.58	246.57
chr17	60869738	60870450	713	*	6.79613	4.47415	7.64413	-3.03116	2.7452e-28	3.85596e-26	26.66	17.8	202.82	197.25
chr11	110395380	110396564	1185	*	6.90523	4.76485	7.73157	-2.85811	2.75347e-28	3.8634e-26	27.68	26.69	193.12	231.95
chr12	71053988	71056447	2460	*	8.01088	6.87671	8.63793	-1.73732	2.80459e-28	3.93087e-26	113.8	121.23	362.95	433.77
chr10	131770590	131771688	1099	*	7.45913	8.17448	5.97766	2.14688	2.85976e-28	3.99969e-26	255.28	322.54	62.11	63.92
chr1	221128816	221130140	1325	*	6.87251	4.74442	7.69727	-2.85013	2.86233e-28	3.99969e-26	23.58	30.03	209.62	205.47
chr20	21376439	21378249	1811	*	7.42593	8.12953	5.99712	2.08609	2.86293e-28	3.99969e-26	267.59	292.51	60.17	67.58
chr20	43438324	43439794	1471	*	6.88602	7.6904	4.90667	2.68846	2.91478e-28	4.06774e-26	204.02	209.09	26.2	33.79
chr15	80879949	80881209	1261	*	7.5858	6.25205	8.26681	-1.97643	3.12495e-28	4.35637e-26	77.92	74.52	302.78	313.23
chr10	50348242	50349011	770	*	7.3232	5.73031	8.06174	-2.27002	3.21145e-28	4.47216e-26	59.46	46.71	281.43	252.96
chr9	139740317	139741791	1475	*	7.72569	8.37722	6.50531	1.8406	3.22053e-28	4.47999e-26	315.77	349.23	92.19	89.49
chr11	85537364	85539146	1783	*	7.589	6.22583	8.2772	-2.00709	3.25955e-28	4.52941e-26	84.07	65.62	316.37	304.1
chr2	72057568	72058392	825	*	6.91361	4.87403	7.72654	-2.7538	3.37103e-28	4.6783e-26	29.73	28.92	214.47	209.12
chr11	121465477	121466575	1099	*	7.21333	5.52487	7.97013	-2.38361	3.3739e-28	4.6783e-26	42.03	50.05	265.9	235.61
chr12	113905150	113906405	1256	*	6.7497	7.58512	4.53627	2.93744	3.44503e-28	4.77182e-26	192.74	191.3	28.14	18.26
chr10	43724500	43725807	1308	*	6.83355	7.64647	4.79395	2.75328	3.45941e-28	4.78663e-26	192.74	207.98	27.17	28.31
chr15	81482249	81483387	1139	*	7.17396	5.47021	7.93355	-2.39833	3.5422e-28	4.89597e-26	43.06	45.6	254.26	234.69
chr14	65345869	65347682	1814	*	7.16531	7.91299	5.52556	2.32556	3.76296e-28	5.19556e-26	230.68	251.36	44.64	47.49
chr19	43240578	43242111	1534	*	7.49907	6.09496	8.19697	-2.05994	3.77395e-28	5.20521e-26	66.64	70.07	304.72	282.18
chr8	38384888	38387277	2390	*	9.04198	8.3543	9.50576	-1.14176	3.84946e-28	5.30371e-26	347.56	306.97	729.78	724.17
chr8	52373141	52374419	1279	*	7.06293	5.20865	7.84821	-2.56393	3.9322e-28	5.41197e-26	32.81	41.15	242.61	218.26
chr15	75952333	75954322	1990	*	8.58271	7.76122	9.1029	-1.33101	3.98226e-28	5.47506e-26	208.12	225.78	545.39	554.32
chr4	5367664	5368711	1048	*	7.03852	5.17469	7.82533	-2.56597	4.16192e-28	5.71602e-26	39.98	32.25	228.06	225.56
chr2	196426216	196427061	846	*	6.92771	4.81825	7.75005	-2.82467	4.18317e-28	5.73544e-26	29.73	26.69	193.12	237.43
chr2	99438742	99439939	1198	*	6.82545	7.65022	4.69728	2.84573	4.1849e-28	5.73544e-26	180.44	221.33	28.14	23.74
chr5	148552113	148553456	1344	*	7.85064	6.64196	8.49895	-1.83209	4.29955e-28	5.88634e-26	84.07	115.67	361.01	362.54
chr16	50285515	50286558	1044	*	7.49836	6.07669	8.20033	-2.07689	4.40182e-28	6.02001e-26	73.82	61.17	281.43	306.84
chr15	75248133	75250024	1892	*	8.40126	8.94246	7.52511	1.40213	4.45502e-28	6.08636e-26	489.04	494.93	176.62	191.77
chr5	178730417	178731399	983	*	7.20629	5.55531	7.9561	-2.34105	4.48982e-28	6.12745e-26	45.11	48.94	245.52	251.13
chr20	30457357	30458932	1576	*	8.13187	8.71244	7.14497	1.54856	4.74155e-28	6.4642e-26	428.55	410.4	138.77	144.29
chr22	30591348	30593689	2342	*	8.48391	7.59515	9.0298	-1.42272	4.76611e-28	6.49086e-26	174.29	212.43	537.63	507.74
chr9	16235093	16236453	1361	*	6.90186	4.75327	7.72924	-2.85746	4.78457e-28	6.50917e-26	32.81	21.13	197	227.39
chr4	180979009	180980728	1720	*	7.11587	7.87195	5.43137	2.37339	4.86722e-28	6.61468e-26	232.73	235.79	38.82	47.49
chr5	121487591	121488955	1365	*	7.45445	6.0055	8.16261	-2.10696	4.87482e-28	6.61807e-26	71.77	56.72	287.25	285.83
chr18	9095045	9095959	915	*	6.92964	4.92154	7.73815	-2.71822	4.92829e-28	6.68368e-26	32.81	27.8	210.59	216.43
chr6	107435552	107437483	1932	*	8.73894	9.23193	7.98418	1.23768	4.98962e-28	6.7598e-26	586.44	616.16	256.2	250.22
chr7	155595677	155596971	1295	*	6.9356	7.72405	5.06143	2.58027	5.02172e-28	6.79618e-26	207.1	215.77	33	33.79
chr8	81785311	81786990	1680	*	7.82715	8.473	6.62734	1.81197	5.05856e-28	6.83892e-26	341.4	369.25	85.4	112.32
chr10	121171652	121173789	2138	*	8.46471	7.59501	9.00349	-1.3929	5.46768e-28	7.38433e-26	200.95	185.74	526.95	499.52
chr5	38718540	38720125	1586	*	7.26001	5.6417	8.00356	-2.29918	5.61497e-28	7.57537e-26	55.36	44.49	248.43	264.83
chr7	22612920	22613408	489	*	6.65431	3.94778	7.53934	-3.40278	5.72441e-28	7.71499e-26	16.4	14.46	176.62	195.43
chr12	52624348	52625366	1019	*	7.66303	6.39162	8.32818	-1.90445	6.08284e-28	8.18956e-26	78.94	88.98	323.16	319.62
chr5	140345573	140346945	1373	*	6.54293	7.43666	3.72714	3.51151	6.21817e-28	8.36308e-26	189.67	156.82	15.53	10.96
chr6	12760632	12761622	991	*	6.80462	4.5446	7.64558	-2.97021	6.36927e-28	8.55744e-26	26.66	20.02	209.62	190.86
chr9	111434321	111435247	927	*	6.93605	4.95386	7.74085	-2.69596	6.39165e-28	8.57862e-26	29.73	32.25	208.65	219.17
chr1	161971962	161973807	1846	*	7.83801	6.62581	8.4873	-1.83548	6.41639e-28	8.60294e-26	84.07	113.44	370.71	347.02
chr22	43364516	43365233	718	*	6.80399	4.58904	7.63959	-2.93418	6.42628e-28	8.6073e-26	22.56	25.58	197	201.82
chr1	201872540	201874533	1994	*	7.70662	6.46185	8.36475	-1.87116	6.58433e-28	8.80991e-26	85.09	91.2	339.66	319.62
chr18	23228809	23230236	1428	*	7.33936	5.81936	8.06297	-2.19069	6.62068e-28	8.84941e-26	58.44	54.5	273.67	261.18
chr18	34833344	34834748	1405	*	7.40236	8.1086	5.96191	2.10482	6.69008e-28	8.93298e-26	283.99	268.04	69.87	54.79
chr2	233285133	233286085	953	*	6.6528	7.50423	4.29957	3.06447	6.72585e-28	8.96392e-26	177.37	185.74	17.47	21.92
chr16	17931198	17932352	1155	*	7.16707	5.44193	7.9305	-2.41479	6.72706e-28	8.96392e-26	50.24	36.7	236.79	251.13
chr8	63160542	63162027	1486	*	6.47829	7.38826	3.43137	3.70861	6.73842e-28	8.96984e-26	167.11	167.94	9.7	11.87
chr22	26717139	26718542	1404	*	7.93038	6.78669	8.56023	-1.74241	6.77386e-28	9.00778e-26	124.05	96.76	382.36	372.59
chr3	193854542	193855987	1446	*	8.76833	8.00253	9.26595	-1.25378	6.92787e-28	9.20314e-26	247.08	265.82	639.53	591.76
chr1	46378203	46380412	2210	*	7.60861	6.29595	8.28435	-1.95285	6.94552e-28	9.21716e-26	74.84	82.3	322.19	301.36
chr3	134182391	134182872	482	*	6.88205	4.71418	7.71187	-2.88908	6.9785e-28	9.25147e-26	23.58	28.92	188.27	231.04
chr14	75389090	75390943	1854	*	8.03027	8.63131	6.98093	1.62908	7.36898e-28	9.75916e-26	379.34	413.74	133.92	118.72
chr12	49374750	49375850	1101	*	7.15098	7.89573	5.52645	2.30883	7.77427e-28	1.02854e-25	232.73	243.57	45.61	46.57
chr3	159646740	159647942	1203	*	7.35003	5.8042	8.07905	-2.22792	7.81025e-28	1.03225e-25	46.14	65.62	266.87	273.96
chr14	90311929	90312604	676	*	6.60362	3.62708	7.50893	-3.65591	7.82554e-28	1.03322e-25	10.25	14.46	184.39	179.9
chr17	10169108	10170476	1369	*	7.01557	5.15934	7.80117	-2.56107	7.93462e-28	1.04656e-25	35.88	35.59	224.17	221.91
chr8	26466938	26469112	2175	*	8.83895	8.10865	9.32151	-1.20401	7.99133e-28	1.05296e-25	270.66	281.39	654.08	625.55
chr21	47469575	47471048	1474	*	8.63236	7.83839	9.14155	-1.29178	8.03366e-28	1.05747e-25	228.63	229.11	571.59	557.97
chr7	76050687	76051912	1226	*	7.50291	6.12526	8.19458	-2.02721	8.43962e-28	1.10978e-25	71.77	67.84	288.22	297.71
chr10	76802317	76803774	1458	*	7.49899	6.06475	8.20382	-2.09094	8.57522e-28	1.12647e-25	73.82	60.06	274.64	315.06
chr10	106400907	106402566	1660	*	6.89588	7.69633	4.9433	2.66852	8.97478e-28	1.17777e-25	210.17	204.64	36.88	24.66
chr6	4370800	4372403	1604	*	7.78284	6.58839	8.4272	-1.81047	9.12635e-28	1.19645e-25	91.25	101.21	354.21	334.23
chr20	60257994	60259505	1512	*	7.25546	5.66635	7.99325	-2.27207	9.32117e-28	1.22075e-25	48.19	53.39	248.43	261.18
chr13	77212324	77213835	1512	*	7.13968	5.42919	7.90049	-2.4014	9.38521e-28	1.2279e-25	46.14	40.04	236.79	241.09
chr11	130347770	130349718	1949	*	8.08437	7.05743	8.6782	-1.59844	9.45777e-28	1.23615e-25	137.38	129.01	420.2	399.07
chr20	45523013	45524532	1520	*	6.94914	7.74395	5.03402	2.61967	9.54862e-28	1.24677e-25	229.65	199.08	27.17	38.35
chr16	755009	756386	1378	*	7.15625	7.89909	5.54156	2.29794	9.68907e-28	1.26383e-25	232.73	244.68	46.58	46.57
chr11	111154208	111155596	1389	*	7.59932	6.27069	8.27906	-1.97451	1.00327e-27	1.3062e-25	67.67	86.75	314.43	306.84
chr19	54371169	54372591	1423	*	9.01415	8.32778	9.47734	-1.14296	1.0034e-27	1.3062e-25	304.5	338.11	728.81	696.78
chr5	1294365	1295852	1488	*	6.49996	7.40403	3.54152	3.6213	1.01175e-27	1.31575e-25	163.01	175.73	7.76	15.52
chr9	118705549	118706898	1350	*	7.2856	5.67839	8.02697	-2.28902	1.02904e-27	1.3369e-25	51.26	51.16	282.4	239.26
chr7	114870725	114872458	1734	*	6.75338	4.44913	7.5994	-3.01768	1.03585e-27	1.3444e-25	22.56	21.13	197	190.86
chr9	124666322	124667368	1047	*	6.84706	4.73739	7.66943	-2.8247	1.03865e-27	1.34668e-25	26.66	26.69	198.94	208.21
chr10	127936473	127937159	687	*	7.04175	5.20355	7.82443	-2.54215	1.05293e-27	1.36383e-25	35.88	37.81	238.73	214.6
chr6	11614347	11615813	1467	*	7.18806	5.5395	7.93741	-2.33781	1.05673e-27	1.3674e-25	44.09	48.94	245.52	244.74
chr3	187346777	187347455	679	*	6.69768	4.22684	7.56131	-3.18431	1.07816e-27	1.39374e-25	17.43	20.02	180.5	197.25
chr5	73611284	73612973	1690	*	7.77538	6.58773	8.41784	-1.80209	1.08119e-27	1.39626e-25	92.27	100.1	340.63	343.37
chr17	76370893	76371938	1046	*	7.80153	6.6244	8.44101	-1.78706	1.08809e-27	1.40377e-25	99.45	97.87	358.1	336.97
chr1	7530548	7532835	2288	*	9.27125	8.66752	9.69558	-1.02269	1.09255e-27	1.40813e-25	403.94	409.29	821	837.41
chr15	41803506	41806357	2852	*	8.05902	8.65874	7.0138	1.62404	1.10652e-27	1.42472e-25	383.44	424.86	139.74	118.72
chr5	90606683	90607501	819	*	7.10602	5.35579	7.87388	-2.44443	1.11175e-27	1.43003e-25	44.09	37.81	228.06	241.09
chr4	77705009	77705644	636	*	6.87653	4.78953	7.69589	-2.79764	1.11368e-27	1.4311e-25	29.73	25.58	218.35	196.34
chr8	11337546	11339178	1633	*	8.33617	7.40684	8.89679	-1.4707	1.12326e-27	1.44198e-25	181.47	157.93	493.96	459.34
chr17	8906162	8907632	1471	*	7.05334	7.82164	5.30062	2.44631	1.14991e-27	1.47473e-25	212.22	240.23	35.91	42.92
chr2	15309983	15311123	1141	*	7.24931	5.64797	7.98953	-2.28379	1.16678e-27	1.49489e-25	50.24	50.05	241.64	266.66
chr7	1577105	1577704	600	*	8.39941	7.51812	8.94252	-1.41134	1.18091e-27	1.51151e-25	175.32	191.3	488.14	495.87
chr15	83348522	83349929	1408	*	6.48467	7.38646	3.55914	3.60333	1.19421e-27	1.52703e-25	158.91	175.73	12.62	10.96
chr1	66930738	66932389	1652	*	7.48792	6.10665	8.18046	-2.03345	1.26591e-27	1.61712e-25	66.64	71.18	284.34	295.88
chr2	1977374	1978213	840	*	6.62041	3.72321	7.52018	-3.56694	1.27694e-27	1.6296e-25	16.4	10.01	170.8	196.34
chr2	176957094	176958369	1276	*	7.47677	8.16843	6.09915	2.02506	1.29731e-27	1.65397e-25	270.66	304.74	64.05	73.06
chr15	100913153	100914221	1069	*	6.46723	7.4047	2.90804	4.13966	1.36091e-27	1.73335e-25	174.29	164.61	6.79	8.22
chr2	197851803	197853852	2050	*	7.24089	5.64546	7.97994	-2.27514	1.3661e-27	1.73825e-25	52.29	47.82	246.49	258.44
chr5	131429460	131430476	1017	*	7.37302	5.88765	8.08922	-2.15149	1.44243e-27	1.83359e-25	59.46	58.95	285.31	259.35
chr5	37776943	37778542	1600	*	7.75773	6.55011	8.40575	-1.82813	1.44548e-27	1.83566e-25	85.09	102.32	336.75	341.54
chr11	128730438	128733008	2571	*	7.72538	6.44713	8.39232	-1.91384	1.47308e-27	1.86888e-25	79.97	94.54	307.63	364.37
chr4	88949701	88951168	1468	*	7.29301	5.75467	8.02047	-2.21429	1.52016e-27	1.92673e-25	51.26	56.72	258.14	261.18
chr10	126631159	126632283	1125	*	6.8613	4.76946	7.68131	-2.80856	1.53917e-27	1.94892e-25	25.63	28.92	194.09	216.43
chr22	43330263	43330815	553	*	7.5499	6.22265	8.2293	-1.96832	1.65558e-27	2.09427e-25	74.84	74.52	297.93	302.27
chr19	6392471	6394304	1834	*	8.93238	8.24112	9.39777	-1.14888	1.69287e-27	2.13937e-25	300.39	304.74	670.58	678.51
chr6	112619541	112621170	1630	*	7.57176	6.25616	8.24825	-1.95602	1.72069e-27	2.17241e-25	72.79	80.08	308.6	299.53
chr1	246035573	246036353	781	*	6.83781	4.69735	7.66416	-2.84718	1.77089e-27	2.23158e-25	30.76	21.13	204.76	200.91
chr18	74170769	74171877	1109	*	8.01061	6.95628	8.61323	-1.63394	1.771e-27	2.23158e-25	127.13	121.23	381.39	401.81
chr7	40866701	40867739	1039	*	7.36059	5.82689	8.08709	-2.20259	1.77842e-27	2.23876e-25	64.59	48.94	256.2	287.66
chr20	24653743	24654418	676	*	7.05052	5.26091	7.82515	-2.48734	1.78983e-27	2.25094e-25	39.98	36.7	227.09	226.47
chr13	42205009	42205744	736	*	6.62772	3.95588	7.50984	-3.37206	1.83908e-27	2.31064e-25	14.35	16.68	188.27	176.25
chr21	36041430	36043191	1762	*	8.0371	8.63131	7.009	1.59961	1.868e-27	2.3447e-25	379.34	413.74	125.19	132.41
chr3	8911734	8912758	1025	*	7.07029	5.27393	7.84606	-2.50302	1.91123e-27	2.39665e-25	31.78	45.6	230.97	229.21
chr16	67892049	67893163	1115	*	8.06836	7.02431	8.66771	-1.62458	1.92948e-27	2.4172e-25	116.88	143.47	412.44	400.9
chr7	44364190	44365491	1302	*	7.06732	7.83768	5.30272	2.45927	1.95317e-27	2.44452e-25	205.05	252.47	37.85	41.09
chr1	92164145	92165173	1029	*	6.97125	5.07595	7.763	-2.60513	1.96975e-27	2.46289e-25	30.76	36.7	212.53	221.91
chr12	51180952	51182288	1337	*	7.43314	6.0162	8.13402	-2.07554	2.00458e-27	2.50402e-25	60.49	68.96	282.4	279.44
chr10	46970029	46971422	1394	*	8.44208	8.97693	7.58273	1.37864	2.02114e-27	2.52228e-25	483.91	523.84	183.41	199.99
chr16	88152700	88153963	1264	*	7.37851	5.90929	8.09117	-2.13092	2.0759e-27	2.58813e-25	64.59	55.61	266.87	278.53
chr2	135475461	135477069	1609	*	7.17979	7.9158	5.59961	2.25904	2.10139e-27	2.6174e-25	232.73	250.24	49.49	47.49
chr21	47285337	47286674	1338	*	7.47716	6.07854	8.17378	-2.04915	2.11471e-27	2.63147e-25	71.77	63.4	300.84	276.7
chr4	4626048	4627573	1526	*	7.44869	6.04533	8.14643	-2.05576	2.1281e-27	2.64559e-25	68.69	63.4	287.25	279.44
chr1	54199024	54199791	768	*	7.50444	6.14895	8.19078	-2.00152	2.13292e-27	2.64904e-25	70.74	71.18	293.08	291.31
chr12	110545791	110546869	1079	*	7.00528	5.14027	7.79227	-2.57145	2.22326e-27	2.75861e-25	33.83	36.7	208.65	234.69
chr6	158135461	158136204	744	*	7.43717	6.02373	8.13724	-2.06912	2.22603e-27	2.7594e-25	65.62	64.51	272.7	290.4
chr4	995831	997659	1829	*	7.39505	8.09317	5.99003	2.05916	2.25319e-27	2.7904e-25	261.44	284.72	65.02	62.1
chr10	23481230	23482391	1162	*	6.46865	7.39423	3.15452	3.93145	2.26826e-27	2.80639e-25	150.71	185.74	7.76	10.05
chr11	130667299	130668194	896	*	6.946	4.99885	7.74565	-2.65525	2.27998e-27	2.8164e-25	32.81	31.14	201.85	227.39
chr17	20203088	20204754	1667	*	7.80437	6.6368	8.44112	-1.77364	2.28069e-27	2.8164e-25	105.6	93.42	343.54	351.58
chr8	98102637	98104194	1558	*	7.06849	5.21675	7.85336	-2.55222	2.28996e-27	2.82516e-25	41.01	33.37	208.65	253.87
chr13	111098203	111099162	960	*	7.22414	5.63188	7.96256	-2.27186	2.34272e-27	2.88751e-25	50.24	48.94	252.32	246.57
chr7	70596279	70597825	1547	*	6.53679	7.49266	2.48381	4.51611	2.40633e-27	2.96309e-25	172.24	187.96	3.88	7.31
chr11	33695828	33696619	792	*	6.87673	4.80756	7.6937	-2.79079	2.43485e-27	2.99537e-25	21.53	34.48	207.68	206.38
chr2	69198101	69199008	908	*	6.88595	4.87617	7.69469	-2.72121	2.4449e-27	3.00489e-25	28.71	30.03	212.53	201.82
chr14	96342149	96343730	1582	*	6.77606	7.61862	4.50215	2.98849	2.47691e-27	3.04135e-25	165.06	228	25.23	20.09
chr18	2880387	2882709	2323	*	8.70944	7.95133	9.20383	-1.24205	2.52325e-27	3.09532e-25	248.11	246.91	595.86	583.54
chr8	102505478	102506578	1101	*	7.49468	8.17499	6.16377	1.97467	2.57893e-27	3.16063e-25	292.19	285.83	77.64	65.75
chr4	187025557	187026938	1382	*	7.59661	8.25632	6.34588	1.87601	2.76439e-27	3.38473e-25	303.47	308.08	79.58	83.1
chr11	76327840	76329379	1540	*	7.23976	5.65172	7.97734	-2.26949	2.79427e-27	3.41809e-25	47.16	53.39	262.02	242
chr17	79069041	79069929	889	*	8.16708	7.19511	8.74258	-1.52805	2.92716e-27	3.57729e-25	150.71	142.36	419.23	437.43
chr11	111426785	111428532	1748	*	7.93656	6.81491	8.55989	-1.71544	2.93747e-27	3.5865e-25	125.08	100.1	363.92	390.85
chr8	103140111	103141679	1569	*	7.16293	5.50596	7.91388	-2.34548	3.36761e-27	4.10782e-25	43.06	47.82	250.38	231.95
chr6	157429283	157430667	1385	*	7.29803	5.72795	8.03199	-2.24188	3.38699e-27	4.12718e-25	61.51	44.49	251.35	272.14
chr7	116869150	116870551	1402	*	6.79198	4.53167	7.63296	-2.98219	3.38984e-27	4.12718e-25	18.45	27.8	181.47	215.52
chr9	118378525	118379676	1152	*	6.89116	4.90533	7.69648	-2.69838	3.46357e-27	4.21299e-25	27.68	32.25	205.74	209.12
chr7	24323230	24325130	1901	*	6.5168	7.39341	3.90804	3.30547	3.57394e-27	4.34318e-25	166.09	170.17	13.59	16.44
chr1	210068192	210069109	918	*	7.04234	5.25927	7.81586	-2.47842	3.63161e-27	4.40913e-25	41.01	35.59	224.17	226.47
chr5	34672867	34674461	1595	*	7.69954	6.46525	8.35485	-1.85427	3.65783e-27	4.43681e-25	93.3	83.41	340.63	314.14
chr3	197535375	197537431	2057	*	7.65951	6.39966	8.32164	-1.88833	3.7878e-27	4.59016e-25	80.99	87.86	335.78	304.1
chr2	19092307	19093815	1509	*	7.09041	5.36495	7.85391	-2.42202	3.81235e-27	4.61561e-25	37.93	44.49	227.09	235.61
chr22	43462276	43463707	1432	*	7.73666	6.50734	8.39062	-1.85257	3.82279e-27	4.62394e-25	84.07	97.87	356.15	315.06
chr2	158101996	158103120	1125	*	7.08039	5.29099	7.85498	-2.48001	3.84887e-27	4.65115e-25	47.16	31.14	232.91	230.13
chr4	7961619	7962543	925	*	7.44575	6.04913	8.14191	-2.05039	4.0507e-27	4.8903e-25	64.59	67.84	272.7	292.23
chr2	242002409	242004425	2017	*	7.22809	7.95381	5.69808	2.205	4.0543e-27	4.8903e-25	251.18	244.68	57.26	46.57
chr1	222543653	222544691	1039	*	7.02263	5.22516	7.79858	-2.4978	4.14892e-27	4.99978e-25	35.88	38.93	226.11	219.17
chr6	1363548	1365287	1740	*	7.49657	6.12186	8.18754	-2.02676	4.2065e-27	5.06447e-25	62.54	76.74	301.81	281.27
chr3	139027717	139029061	1345	*	7.59742	6.31071	8.26655	-1.91805	4.21444e-27	5.06932e-25	82.02	76.74	316.37	299.53
chr2	69199259	69200379	1121	*	7.03988	5.21373	7.8206	-2.53503	4.23763e-27	5.09249e-25	29.73	44.49	218.35	233.78
chr2	205332349	205333867	1519	*	6.64425	4.13493	7.51164	-3.2122	4.37135e-27	5.24833e-25	18.45	16.68	180.5	184.47
chr7	143154425	143155472	1048	*	6.70754	4.38279	7.55586	-3.0389	4.43523e-27	5.32011e-25	19.48	22.24	187.3	189.03
chr1	235122611	235123961	1351	*	7.59072	6.30454	8.25971	-1.9196	4.44889e-27	5.33156e-25	76.89	81.19	313.46	299.53
chr10	76512832	76514629	1798	*	7.58547	6.28248	8.25876	-1.93897	4.5749e-27	5.47752e-25	78.94	76.74	291.13	321.45
chr14	105633557	105635134	1578	*	7.49986	8.17478	6.19051	1.948	4.59287e-27	5.49396e-25	293.22	284.72	76.67	69.4
chr19	4278749	4280187	1439	*	7.02282	7.78908	5.28169	2.43146	4.66696e-27	5.57745e-25	213.25	229.11	33.97	43.83
chr10	6762384	6763549	1166	*	7.05039	5.27069	7.82334	-2.48161	4.69976e-27	5.61147e-25	33.83	43.38	232.91	220.08
chr8	53852252	53854293	2042	*	7.53872	8.22315	6.19107	1.99172	4.71004e-27	5.61859e-25	270.66	326.99	77.64	68.49
chr22	48972120	48973053	934	*	6.48091	7.43073	2.6106	4.37954	4.72834e-27	5.63524e-25	167.11	177.95	5.82	6.39
chr16	69547859	69549968	2110	*	7.22758	5.65172	7.96272	-2.25563	4.76949e-27	5.67906e-25	47.16	53.39	253.29	245.65
chr15	39757428	39758501	1074	*	7.00368	5.18507	7.78315	-2.5214	4.84462e-27	5.76323e-25	33.83	38.93	223.2	217.34
chr7	46018023	46019423	1401	*	7.58503	6.28875	8.25662	-1.92816	4.95808e-27	5.8928e-25	84.07	72.29	306.66	305.01
chr7	130919504	130920616	1113	*	6.91427	4.97154	7.71325	-2.64671	4.97194e-27	5.90387e-25	33.83	28.92	210.59	209.12
chr10	69854184	69855047	864	*	6.92337	4.99689	7.71991	-2.63041	4.99927e-27	5.92932e-25	33.83	30.03	212.53	209.12
chr15	62456003	62457356	1354	*	7.01666	7.79468	5.20678	2.514	5.00251e-27	5.92932e-25	206.07	238.01	44.64	29.22
chr1	235183046	235184765	1720	*	8.0962	7.09634	8.68112	-1.56597	5.04678e-27	5.97633e-25	130.21	143.47	417.29	403.64
chr5	133772430	133774896	2467	*	8.71848	7.96845	9.20947	-1.23163	5.56933e-27	6.58912e-25	244.01	256.92	596.83	587.19
chr2	202014389	202015986	1598	*	7.84485	6.72108	8.46882	-1.72	5.60959e-27	6.63071e-25	108.68	102.32	355.18	353.41
chr3	185910844	185912341	1498	*	6.63507	7.48295	4.31418	3.03896	5.65488e-27	6.67816e-25	187.62	170.17	24.26	15.52
chr14	65111066	65112205	1140	*	7.25334	5.66979	7.99003	-2.25618	5.68355e-27	6.70591e-25	58.44	43.38	260.08	248.39
chr1	223403744	223405157	1414	*	7.6343	6.37978	8.29501	-1.88101	5.80708e-27	6.84544e-25	82.02	84.53	323.16	305.01
chr3	128719810	128721256	1447	*	6.74648	7.56116	4.6941	2.76328	5.86299e-27	6.90508e-25	188.64	189.07	26.2	25.57
chr21	28941701	28943108	1408	*	7.24001	5.68084	7.97177	-2.23637	5.93513e-27	6.98371e-25	49.21	53.39	244.55	257.52
chr7	43076724	43077840	1117	*	6.69559	4.34381	7.54686	-3.06312	5.94289e-27	6.98651e-25	19.48	21.13	194.09	179.9
chr3	50242323	50243561	1239	*	7.30521	8.01445	5.85141	2.11312	6.23544e-27	7.3238e-25	262.46	254.69	53.37	62.1
chr6	169497700	169498263	564	*	6.82181	4.73268	7.64145	-2.79683	6.25069e-27	7.33507e-25	28.71	24.47	205.74	193.6
chr17	81144064	81144684	621	*	7.62974	6.35288	8.29633	-1.90804	6.59997e-27	7.73794e-25	78.94	84.53	332.86	295.88
chr12	58819460	58820796	1337	*	7.37955	5.89715	8.09509	-2.15367	6.71483e-27	7.8655e-25	50.24	68.96	261.05	285.83
chr14	71709473	71710456	984	*	6.76599	4.58643	7.59727	-2.89255	6.82837e-27	7.99128e-25	23.58	24.47	187.3	199.99
chr17	48070709	48071365	657	*	6.82181	7.62853	4.82626	2.70786	6.9539e-27	8.13086e-25	185.57	210.21	33	23.74
chr19	1123440	1124800	1361	*	7.64562	8.29375	6.43757	1.82539	6.99457e-27	8.17106e-25	310.65	316.98	90.25	83.1
chr14	23582687	23584208	1522	*	7.77381	6.60109	8.41204	-1.78181	7.43287e-27	8.67527e-25	97.4	96.76	325.1	356.15
chr11	8289421	8290392	972	*	7.1835	7.93816	5.50669	2.369	7.94085e-27	9.24819e-25	222.48	268.04	55.32	35.62
chr8	129189339	129190769	1431	*	8.08777	7.09221	8.67125	-1.55837	7.94177e-27	9.24819e-25	139.43	133.46	399.82	415.51
chr5	134772437	134773834	1398	*	7.60129	6.2715	8.28132	-1.97433	7.94512e-27	9.24819e-25	66.64	87.86	330.92	291.31
chr17	32639379	32640279	901	*	6.80306	4.68816	7.62611	-2.83272	8.05257e-27	9.36486e-25	21.53	30.03	196.03	199.08
chr3	77873820	77875360	1541	*	6.91426	4.96754	7.71384	-2.64732	8.12099e-27	9.43598e-25	35.88	26.69	213.5	206.38
chr8	129895912	129897007	1096	*	6.83205	4.76254	7.64907	-2.77703	8.30625e-27	9.64261e-25	28.71	25.58	210.59	190.86
chr4	1794938	1796738	1801	*	7.85457	8.46968	6.76017	1.6853	8.31687e-27	9.6463e-25	347.56	361.46	114.51	102.28
chr21	29911624	29912578	955	*	7.03843	5.28168	7.80743	-2.45051	8.38453e-27	9.71609e-25	39.98	37.81	226.11	221.91
chr5	121499312	121501219	1908	*	7.25215	5.68206	7.98612	-2.24945	8.48692e-27	9.82597e-25	48.19	54.5	236.79	270.31
chr11	66737684	66738312	629	*	6.98712	5.15582	7.76868	-2.52944	8.71446e-27	1.00804e-24	37.93	33.37	210.59	225.56
chr1	13839370	13840833	1464	*	6.41429	7.33312	3.22225	3.81822	8.80905e-27	1.01808e-24	157.89	164.61	6.79	11.87
chr4	1396679	1397894	1216	*	6.61042	7.45999	4.27429	3.04976	8.83813e-27	1.02053e-24	188.64	163.49	21.35	17.35
chr10	131821152	131822418	1267	*	7.6649	6.42862	8.32074	-1.86077	8.95577e-27	1.03319e-24	79.97	92.31	328.98	310.49
chr18	48085683	48087578	1896	*	7.22007	7.94661	5.68614	2.20882	9.04995e-27	1.04313e-24	240.93	252.47	58.23	44.75
chr11	35084598	35085800	1203	*	7.14756	5.49378	7.89791	-2.34449	9.1526e-27	1.05403e-24	38.96	51.16	237.76	239.26
chr7	47797812	47798639	828	*	7.22543	5.66016	7.95842	-2.23917	9.20243e-27	1.05883e-24	53.31	47.82	243.58	253.87
chr10	106059213	106059793	581	*	7.34233	5.88871	8.05153	-2.11489	9.23283e-27	1.06138e-24	58.44	60.06	263.96	266.66
chr10	65312112	65313808	1697	*	7.28397	5.77839	8.00452	-2.17272	9.36177e-27	1.07525e-24	56.39	53.39	254.26	259.35
chr15	39758677	39759979	1303	*	7.57007	6.2857	8.2386	-1.91774	9.50441e-27	1.09067e-24	74.84	81.19	301.81	302.27
chr2	47297207	47298539	1333	*	8.35601	7.44432	8.91028	-1.4528	9.61586e-27	1.10249e-24	154.81	193.52	491.05	471.21
chr7	157405329	157406737	1409	*	6.54054	7.40329	4.07858	3.16415	9.66689e-27	1.10736e-24	165.06	173.5	15.53	18.26
chr10	125843434	125844522	1089	*	7.53009	6.20932	8.20788	-1.95731	9.74205e-27	1.11498e-24	77.92	70.07	302.78	288.57
chr11	94666756	94667902	1147	*	6.99956	5.20014	7.77584	-2.49627	9.77326e-27	1.11757e-24	37.93	35.59	216.41	221.91
chr9	113506212	113507234	1023	*	6.92059	5.00668	7.71521	-2.62313	9.84963e-27	1.12531e-24	28.71	35.59	204.76	215.52
chr21	46786369	46786852	484	*	7.29477	5.79406	8.01428	-2.16775	9.88444e-27	1.1283e-24	55.36	55.61	266.87	250.22
chr4	95635108	95637115	2008	*	7.6281	6.34843	8.29541	-1.91435	9.90698e-27	1.12987e-24	71.77	91.2	326.07	302.27
chr2	240196089	240198508	2420	*	9.33356	8.75905	9.74335	-0.97925	1.01363e-26	1.15501e-24	431.62	434.87	854	860.24
chr3	185405865	185407497	1633	*	7.66421	6.44064	8.31661	-1.84242	1.01802e-26	1.159e-24	89.2	84.53	313.46	324.19
chr3	86988281	86989137	857	*	6.72768	4.49099	7.56588	-2.95136	1.02154e-26	1.16199e-24	20.5	24.47	185.36	193.6
chr1	29138361	29139329	969	*	6.6786	7.50926	4.50397	2.89075	1.02749e-26	1.16773e-24	188.64	175.73	26.2	19.18
chr14	70654198	70656153	1956	*	7.66561	8.30862	6.47601	1.80249	1.061e-26	1.20475e-24	312.7	321.42	92.19	85.84
chr2	239545450	239546476	1027	*	7.45619	6.05082	8.15439	-2.05363	1.07754e-26	1.22247e-24	75.87	56.72	278.52	291.31
chr17	59552220	59553252	1033	*	7.44895	6.0548	8.14453	-2.05013	1.12852e-26	1.27919e-24	58.44	74.52	274.64	291.31
chr21	40145698	40147073	1376	*	7.3779	5.95184	8.08087	-2.08299	1.13356e-26	1.28378e-24	61.51	62.28	262.99	278.53
chr2	237571280	237572689	1410	*	7.19227	5.60432	7.92983	-2.26786	1.13757e-26	1.2872e-24	46.14	51.16	248.43	239.26
chr17	81148158	81148535	378	*	7.16984	5.54729	7.91421	-2.30118	1.14249e-26	1.29164e-24	51.26	42.26	236.79	245.65
chr5	125806734	125807904	1171	*	7.50669	6.061	8.21411	-2.10029	1.17413e-26	1.32626e-24	77.92	55.61	268.81	325.1
chr9	133884120	133885154	1035	*	7.20838	7.93129	5.6917	2.18434	1.19871e-26	1.35284e-24	236.83	251.36	49.49	53.88
chr5	172331386	172332209	824	*	7.92221	6.84532	8.53191	-1.6605	1.2204e-26	1.37612e-24	120.98	109	365.86	374.41
chr12	50581335	50581951	617	*	7.09859	5.38997	7.85907	-2.39396	1.23087e-26	1.38673e-24	47.16	36.7	239.7	224.65
chr3	42084342	42086336	1995	*	7.84803	6.73797	8.46788	-1.70424	1.27406e-26	1.43415e-24	105.6	107.88	347.42	360.72
chr10	108331697	108333010	1314	*	7.07947	5.37676	7.83888	-2.39145	1.27531e-26	1.4343e-24	43.06	40.04	223.2	234.69
chr19	1070841	1071739	899	*	6.93541	7.7168	5.10516	2.53058	1.28581e-26	1.44486e-24	192.74	228	36.88	31.96
chr2	151394638	151396307	1670	*	7.25653	5.70699	7.9863	-2.22154	1.29505e-26	1.45399e-24	53.31	51.16	268.81	238.35
chr17	32575937	32577026	1090	*	7.46099	6.07483	8.15468	-2.03172	1.34812e-26	1.51226e-24	75.87	58.95	280.46	289.49
chr12	72687620	72689428	1809	*	7.62363	6.37902	8.28171	-1.8682	1.38323e-26	1.55031e-24	83.04	83.41	318.31	304.1
chr4	36245227	36246528	1302	*	6.48083	7.43493	2.48381	4.46192	1.38585e-26	1.5519e-24	181.47	164.61	3.88	7.31
chr14	34966413	34967488	1076	*	7.1908	5.58773	7.93136	-2.28368	1.3904e-26	1.55476e-24	46.14	50.05	257.17	231.04
chr2	242742434	242744044	1611	*	7.26123	7.98244	5.75253	2.17284	1.3908e-26	1.55476e-24	238.88	266.93	47.55	60.27
chr3	99377059	99379044	1986	*	7.73328	6.55983	8.37172	-1.78116	1.42615e-26	1.59291e-24	96.37	92.31	331.89	330.58
chr3	16181495	16183324	1830	*	7.3792	5.96474	8.0795	-2.0694	1.44278e-26	1.61009e-24	61.51	63.4	269.78	271.22
chr15	58761325	58762071	747	*	7.03504	5.19709	7.81768	-2.54855	1.46813e-26	1.63698e-24	26.66	46.71	218.35	232.87
chr3	184183277	184184639	1363	*	7.58572	6.30834	8.25244	-1.90494	1.47272e-26	1.64069e-24	85.09	73.4	307.63	302.27
chr14	38667665	38669029	1365	*	6.82508	4.79632	7.63649	-2.7388	1.47964e-26	1.64698e-24	26.66	28.92	197.97	199.99
chr5	9060413	9061316	904	*	6.87742	4.86375	7.68672	-2.73187	1.48492e-26	1.65145e-24	21.53	36.7	204.76	207.3
chr22	45093587	45094914	1328	*	8.35911	7.48295	8.90032	-1.40093	1.51186e-26	1.67996e-24	187.62	170.17	471.64	484
chr1	67772881	67774073	1193	*	6.74217	7.55298	4.71775	2.73141	1.51591e-26	1.68302e-24	187.62	187.96	25.23	27.4
chr22	42310043	42311504	1462	*	7.43859	8.11775	6.11231	1.96623	1.5192e-26	1.68523e-24	281.94	273.6	69.87	68.49
chr14	100224173	100224891	719	*	7.41563	6.02373	8.11068	-2.04196	1.52498e-26	1.6902e-24	65.62	64.51	284.34	268.48
chr10	95360284	95361463	1180	*	6.89381	7.67877	5.04156	2.55197	1.53334e-26	1.69802e-24	190.69	219.1	33	32.88
chr15	89345988	89347268	1281	*	6.83292	7.62567	4.93117	2.60272	1.61496e-26	1.78687e-24	194.8	200.2	28.14	32.88
chr8	97939537	97940422	886	*	6.74665	4.54191	7.58102	-2.90733	1.61688e-26	1.78748e-24	27.68	18.91	191.18	191.77
chr17	39296078	39297237	1160	*	6.68309	4.29099	7.53868	-3.09093	1.63145e-26	1.80122e-24	23.58	15.57	173.71	198.17
chr10	89602243	89604485	2243	*	7.11717	5.4688	7.86649	-2.33288	1.63209e-26	1.80122e-24	44.09	44.49	233.88	232.87
chr5	178421149	178422430	1282	*	6.40877	7.32266	3.29957	3.7504	1.64571e-26	1.81472e-24	172.24	147.92	8.73	10.96
chr4	28287934	28289257	1324	*	7.02357	5.26743	7.79247	-2.45261	1.69907e-26	1.87197e-24	35.88	41.15	225.14	218.26
chr9	100796805	100798041	1237	*	7.09882	5.4321	7.85159	-2.35205	1.77243e-26	1.95114e-24	44.09	42.26	230	231.95
chr17	6458237	6460324	2088	*	8.297	8.83811	7.42109	1.40261	1.78719e-26	1.96571e-24	459.31	456	175.65	167.12
chr12	124913317	124914546	1230	*	8.13277	7.16144	8.70804	-1.52536	1.87385e-26	2.05929e-24	151.74	134.58	416.32	420.07
chr11	65554505	65555700	1196	*	7.3299	8.02892	5.92102	2.06108	1.87879e-26	2.06297e-24	266.56	255.81	57.26	63.92
chr12	96039875	96040485	611	*	6.536	3.68573	7.43233	-3.52947	1.88044e-26	2.06304e-24	11.28	14.46	174.68	170.77
chr2	23634927	23635790	864	*	7.09026	5.40337	7.84678	-2.37854	1.90733e-26	2.09077e-24	37.93	46.71	234.85	225.56
chr1	33167134	33169518	2385	*	9.35328	8.77719	9.76386	-0.982373	1.91198e-26	2.09409e-24	420.35	457.11	883.11	855.67
chr2	119914893	119916792	1900	*	6.41941	7.337	3.24856	3.81376	1.91445e-26	2.09503e-24	147.63	175.73	12.62	6.39
chr18	67067440	67069455	2016	*	8.13826	8.72352	7.13738	1.56232	1.92289e-26	2.1025e-24	391.64	453.78	129.07	152.51
chr3	185373355	185374106	752	*	6.87132	4.86545	7.67951	-2.70627	1.94171e-26	2.12129e-24	33.83	24.47	216.41	193.6
chr16	66415550	66416945	1396	*	8.07348	7.05433	8.66477	-1.59264	2.0167e-26	2.20136e-24	117.9	147.92	399.82	411.86
chr11	35601597	35602711	1115	*	7.11263	5.44482	7.86561	-2.35004	2.01995e-26	2.20283e-24	48.19	38.93	229.03	237.43
chr5	173207981	173210111	2131	*	7.91604	6.82965	8.52869	-1.67082	2.02145e-26	2.20283e-24	124.05	103.43	368.77	369.85
chr20	52228500	52229638	1139	*	7.21293	5.66388	7.94261	-2.22241	2.04093e-26	2.2222e-24	50.24	51.16	244.55	247.48
chr15	101720333	101721470	1138	*	7.26493	5.73174	7.99132	-2.20979	2.06889e-26	2.25075e-24	45.11	61.17	252.32	256.61
chr7	2677948	2679187	1240	*	8.58012	7.79271	9.08664	-1.28365	2.07095e-26	2.25111e-24	213.25	230.22	537.63	549.75
chr18	3793214	3794870	1657	*	7.62347	6.36631	8.28488	-1.88071	2.11318e-26	2.29364e-24	87.15	77.85	326.07	297.71
chr10	135341286	135342967	1682	*	7.08964	7.83778	5.4475	2.32429	2.11361e-26	2.29364e-24	244.01	213.54	39.79	47.49
chr8	128938027	128940062	2036	*	8.34109	7.45136	8.88733	-1.42307	2.14699e-26	2.32785e-24	160.96	189.07	465.82	481.26
chr17	46559344	46560791	1448	*	7.51977	6.21355	8.19388	-1.94217	2.14873e-26	2.32785e-24	72.79	75.63	298.9	286.75
chr21	39649944	39651483	1540	*	7.42039	6.03792	8.11321	-2.03218	2.18823e-26	2.36867e-24	63.56	67.84	285.31	268.48
chr3	42076750	42077962	1213	*	7.55927	6.26906	8.2293	-1.92619	2.20409e-26	2.38386e-24	69.72	84.53	297.93	302.27
chr20	48481339	48482813	1475	*	7.66054	6.37811	8.32856	-1.90802	2.21068e-26	2.38899e-24	97.4	68.96	310.54	332.41
chr2	239575881	239577426	1546	*	6.90634	4.9815	7.70263	-2.63175	2.25981e-26	2.44005e-24	28.71	34.48	220.29	196.34
chr17	38699190	38700170	981	*	7.63625	6.38713	8.29553	-1.87361	2.28236e-26	2.46235e-24	85.09	82.3	295.99	332.41
chr3	125898709	125900282	1574	*	7.08797	7.83108	5.47185	2.29991	2.42656e-26	2.61575e-24	229.65	225.78	49.49	39.27
chr13	21572113	21573390	1278	*	7.59544	6.33	8.25903	-1.89243	2.44098e-26	2.62911e-24	83.04	77.85	293.08	319.62
chr17	64377974	64379442	1469	*	6.86806	4.89272	7.67186	-2.67538	2.49456e-26	2.68459e-24	33.83	25.58	210.59	197.25
chr17	74580934	74582609	1676	*	8.04454	8.64033	7.01155	1.60319	2.52119e-26	2.711e-24	373.19	424.86	117.42	140.63
chr2	56068746	56070390	1645	*	7.45908	6.10483	8.14512	-1.99787	2.5391e-26	2.728e-24	68.69	68.96	294.05	272.14
chr15	39464488	39466029	1542	*	7.6777	6.47923	8.32318	-1.81353	2.63877e-26	2.83274e-24	86.12	92.31	316.37	324.19
chr13	112726587	112728079	1493	*	6.38257	7.30684	3.09317	3.91146	2.67518e-26	2.86945e-24	160.96	155.71	10.67	6.39
chr17	804680	805791	1112	*	7.65555	6.42059	8.31104	-1.85466	2.69614e-26	2.88955e-24	91.25	80.08	302.78	332.41
chr10	22623332	22625569	2238	*	8.93138	9.39059	8.25378	1.1277	2.70498e-26	2.89663e-24	642.82	699.57	301.81	308.66
chr14	60981486	60982740	1255	*	6.86145	7.65203	4.97372	2.58566	2.73335e-26	2.92459e-24	187.62	214.65	28.14	34.7
chr10	60419741	60421551	1811	*	7.40009	5.97275	8.10336	-2.08825	2.7823e-26	2.97452e-24	53.31	72.29	283.37	266.66
chr9	118377093	118378157	1065	*	7.16276	5.56699	7.90187	-2.2722	2.83727e-26	3.03079e-24	49.21	45.6	244.55	233.78
chr11	106857364	106858783	1420	*	7.19611	5.62808	7.92967	-2.23979	3.03325e-26	3.23747e-24	53.31	45.6	247.46	240.17
chr14	103576011	103576665	655	*	7.28884	5.80284	8.00517	-2.14716	3.06141e-26	3.26484e-24	60.49	51.16	258.14	255.7
chr21	44752260	44754487	2228	*	8.99961	8.34164	9.44981	-1.09942	3.12243e-26	3.32719e-24	336.28	312.53	705.52	693.12
chr4	77722689	77724486	1798	*	8.10483	7.1376	8.6787	-1.52166	3.14012e-26	3.34329e-24	141.48	140.14	409.53	410.03
chr17	56012763	56014185	1423	*	8.36035	7.49912	8.89592	-1.38226	3.17459e-26	3.37721e-24	179.42	182.4	484.25	468.47
chr12	111471476	111473082	1607	*	6.43415	7.32	3.71775	3.4005	3.30418e-26	3.5122e-24	166.09	153.48	12.62	13.7
chr12	45444038	45445474	1437	*	6.89908	7.67846	5.08102	2.51388	3.30867e-26	3.5141e-24	191.72	217.99	33	34.7
chr20	46648200	46648914	715	*	6.89987	5.00277	7.69191	-2.60033	3.35892e-26	3.56455e-24	30.76	33.37	214.47	199.08
chr14	104129555	104130336	782	*	6.95413	5.08113	7.74239	-2.56557	3.37329e-26	3.57687e-24	41.01	26.69	216.41	211.86
chr6	41395141	41396469	1329	*	7.70472	8.33576	6.55695	1.7507	3.42891e-26	3.63288e-24	328.08	318.09	96.07	92.23
chr8	119344486	119346318	1833	*	7.52831	6.17382	8.21441	-1.99336	3.43391e-26	3.63522e-24	80.99	63.4	317.34	276.7
chr1	8457352	8458531	1180	*	7.11101	5.41045	7.87003	-2.38499	3.43898e-26	3.63761e-24	46.14	38.93	253.29	214.6
chr10	133849545	133850625	1081	*	7.01986	7.78187	5.30272	2.40451	3.47914e-26	3.67709e-24	199.92	240.23	37.85	41.09
chr2	86224463	86226188	1726	*	7.84457	6.73268	8.46498	-1.70272	3.48325e-26	3.67844e-24	114.83	97.87	354.21	352.5
chr2	237771898	237772985	1088	*	7.00028	5.147	7.7854	-2.54414	3.51544e-26	3.70942e-24	43.06	27.8	234.85	206.38
chr1	1550444	1552099	1656	*	9.12812	8.50341	9.56262	-1.05389	3.52565e-26	3.71716e-24	346.53	379.26	760.83	751.57
chr14	68677895	68678930	1036	*	6.81582	4.75143	7.63214	-2.78166	3.534e-26	3.72295e-24	20.5	33.37	193.12	203.64
chr8	69496070	69497291	1222	*	6.54232	3.70028	7.43804	-3.53016	3.63104e-26	3.82191e-24	8.2	17.8	166.92	179.9
chr2	95981066	95981746	681	*	6.69128	4.44626	7.53047	-2.94975	3.63383e-26	3.82191e-24	23.58	20.02	184.39	185.38
chr2	223973283	223974176	894	*	6.61159	4.14914	7.47438	-3.17167	3.65648e-26	3.84262e-24	14.35	21.13	177.59	178.08
chr15	33066591	33067833	1243	*	7.27689	5.76138	7.99955	-2.18012	3.73216e-26	3.91898e-24	58.44	50.05	270.76	241.09
chrX	8724537	8725691	1155	*	6.57675	4.00668	7.44986	-3.27013	3.73566e-26	3.91948e-24	14.35	17.8	168.86	180.81
chr2	31570753	31571703	951	*	6.93703	5.09037	7.72109	-2.54335	3.74344e-26	3.92448e-24	35.88	32.25	218.35	203.64
chr10	108923766	108925002	1237	*	6.55933	7.40802	4.23107	3.03204	3.78663e-26	3.96655e-24	165.06	174.61	17.47	20.09
chr16	30669659	30671689	2031	*	9.14312	8.5176	9.57801	-1.0544	3.79684e-26	3.97404e-24	353.71	379.26	788	740.61
chr7	137637081	137639227	2147	*	7.90899	6.81491	8.524	-1.67929	3.87875e-26	4.0565e-24	125.08	100.1	374.59	361.63
chr2	160084045	160085547	1503	*	7.48618	6.16965	8.1629	-1.95303	3.91583e-26	4.09198e-24	72.79	71.18	289.19	284.01
chr5	180075730	180076978	1249	*	6.9272	7.69875	5.15568	2.46235	3.92261e-26	4.09576e-24	201.97	213.54	32.02	39.27
chr4	152728068	152729432	1365	*	7.44704	6.09313	8.133	-1.99688	3.95994e-26	4.13142e-24	68.69	67.84	291.13	270.31
chr1	36816829	36818554	1726	*	8.53447	7.74085	9.04351	-1.29077	3.96422e-26	4.13257e-24	214.27	213.54	521.13	534.23
chr19	50708400	50709565	1166	*	6.39245	7.33086	2.81163	4.13396	4.03018e-26	4.19796e-24	150.71	171.28	5.82	8.22
chr12	128751090	128753207	2118	*	6.44272	7.39557	2.48381	4.42473	4.07891e-26	4.2453e-24	173.27	163.49	3.88	7.31
chr3	8574206	8574953	748	*	7.02244	5.27683	7.78949	-2.43318	4.2124e-26	4.38073e-24	43.06	34.48	225.14	217.34
chr11	47611061	47612303	1243	*	7.22329	7.94316	5.72089	2.16826	4.22868e-26	4.39414e-24	228.63	263.59	54.35	51.14
chr5	7395158	7396891	1734	*	7.37706	8.07753	5.96188	2.06452	4.24222e-26	4.40468e-24	252.21	288.06	54.35	70.32
chr1	207978145	207979134	990	*	6.84318	4.8676	7.64701	-2.67555	4.405e-26	4.57004e-24	32.81	25.58	200.88	199.99
chr1	3458939	3460713	1775	*	9.08141	8.45236	9.518	-1.05948	4.4734e-26	4.63729e-24	342.43	358.13	738.51	727.82
chr14	59872626	59874048	1423	*	6.84944	4.89693	7.64988	-2.65396	4.5402e-26	4.70279e-24	31.78	27.8	198.94	202.73
chr22	43329293	43329776	484	*	7.10532	5.40454	7.86437	-2.38248	4.63228e-26	4.79433e-24	50.24	34.48	222.23	243.83
chr19	31715754	31716933	1180	*	7.03038	5.27393	7.79932	-2.4556	4.65879e-26	4.81793e-24	31.78	45.6	230	215.52
chr22	18452046	18453296	1251	*	7.80741	6.66512	8.43685	-1.74477	4.81788e-26	4.97849e-24	98.42	104.55	324.13	368.94
chr19	459735	462369	2635	*	8.44999	9.01101	7.51952	1.47187	4.8291e-26	4.98611e-24	449.05	582.79	183.41	183.55
chr2	112910974	112911549	576	*	6.78848	4.73268	7.60364	-2.75908	4.9923e-26	5.15052e-24	28.71	24.47	200.88	188.12
chr15	78912243	78913606	1364	*	6.92112	7.69361	5.14411	2.47406	5.0242e-26	5.17932e-24	219.4	194.63	37.85	32.88
chr8	133492295	133493673	1379	*	6.89332	7.68121	5.02269	2.57023	5.09821e-26	5.25144e-24	182.49	228	33.97	31.05
chr8	99191932	99192694	763	*	7.02324	5.30533	7.78539	-2.40898	5.2654e-26	5.41935e-24	37.93	41.15	219.32	221.91
chr10	134901471	134902732	1262	*	6.41467	7.30255	3.67329	3.42668	5.31594e-26	5.46704e-24	158.91	156.82	14.56	10.96
chr1	22889579	22890605	1027	*	6.60953	7.45407	4.31832	3.00694	5.33774e-26	5.48134e-24	179.42	171.28	26.2	13.7
chr12	117797991	117799454	1464	*	6.39884	7.32783	3.01894	3.98703	5.33829e-26	5.48134e-24	145.58	175.73	11.65	4.57
chr10	4284213	4285564	1352	*	7.77738	6.64859	8.40283	-1.7263	5.46231e-26	5.60424e-24	99.45	101.21	344.51	332.41
chr1	38218168	38220092	1925	*	7.02442	7.78817	5.29753	2.42381	5.55918e-26	5.69912e-24	229.65	212.43	48.52	30.14
chr1	110161966	110163994	2029	*	8.95185	8.28984	9.40393	-1.10725	5.84923e-26	5.99175e-24	304.5	321.42	675.43	679.42
chr15	96399791	96401392	1602	*	6.59707	4.08113	7.4651	-3.20403	6.13022e-26	6.27463e-24	20.5	13.35	185.36	168.03
chr8	49501438	49502252	815	*	7.14999	5.56831	7.88629	-2.25686	6.30715e-26	6.45064e-24	48.19	46.71	234.85	238.35
chr15	80781830	80783029	1200	*	7.45888	6.09844	8.14642	-2.0015	6.34507e-26	6.48431e-24	75.87	61.17	271.73	294.97
chr11	63889524	63890709	1186	*	7.71391	6.55331	8.34866	-1.76569	6.38019e-26	6.51507e-24	93.3	94.54	324.13	327.84
chr10	44675928	44677084	1157	*	6.71868	4.5446	7.54928	-2.87557	6.44877e-26	6.57993e-24	26.66	20.02	189.24	185.38
chr4	1186229	1187424	1196	*	7.71387	6.5127	8.3601	-1.8166	6.49272e-26	6.61957e-24	89.2	93.42	303.75	353.41
chr2	189885935	189887425	1491	*	7.49589	6.18833	8.17035	-1.94039	6.81043e-26	6.93529e-24	76.89	68.96	293.08	283.09
chr2	129059306	129059884	579	*	7.50412	6.15072	8.18995	-1.99669	6.81308e-26	6.93529e-24	68.69	73.4	318.31	265.74
chr7	73183421	73185142	1722	*	7.2786	7.99626	5.78648	2.15116	6.9354e-26	7.05427e-24	247.08	263.59	44.64	65.75
chr6	118228383	118229727	1345	*	6.85103	7.63314	5.01633	2.52922	7.23014e-26	7.34831e-24	196.85	200.2	29.11	35.62
chr3	49850013	49852136	2124	*	7.50341	6.19177	8.1789	-1.94688	7.29144e-26	7.40481e-24	72.79	73.4	304.72	274.87
chr7	31091706	31092881	1176	*	6.60654	7.44036	4.40636	2.90792	7.3669e-26	7.47558e-24	166.09	181.29	22.32	20.09
chr9	84046901	84048074	1174	*	6.67378	4.39178	7.51727	-2.99623	7.39108e-26	7.49427e-24	16.4	25.58	189.24	177.16
chr3	53838152	53839822	1671	*	8.20992	7.29155	8.76661	-1.45652	7.65312e-26	7.75391e-24	160.96	152.37	446.41	424.64
chr17	2679579	2680759	1181	*	6.67199	7.50569	4.47278	2.90811	7.90113e-26	7.99894e-24	159.94	203.53	25.23	19.18
chr6	109266698	109267711	1014	*	7.90457	6.83833	8.51096	-1.64634	7.9822e-26	8.07471e-24	120.98	107.88	355.18	374.41
chr11	26966725	26968849	2125	*	7.05788	5.36799	7.81494	-2.38161	8.04478e-26	8.13168e-24	35.88	46.71	219.32	231.04
chr9	114720592	114722586	1995	*	7.65054	6.44913	8.29684	-1.81371	8.05825e-26	8.13896e-24	90.22	84.53	321.22	307.75
chr7	140304791	140305762	972	*	7.30461	5.86029	8.01172	-2.10123	8.14201e-26	8.21716e-24	59.46	56.72	251.35	264.83
chr1	92115499	92116414	916	*	6.76436	4.64421	7.58809	-2.82504	8.15946e-26	8.22838e-24	26.66	23.36	176.62	208.21
chr10	134599994	134601926	1933	*	7.33888	8.02897	5.96783	2.01669	8.25084e-26	8.31407e-24	253.23	269.15	63.08	62.1
chr5	178804095	178806124	2030	*	7.7588	6.61382	8.38902	-1.74898	8.33748e-26	8.39486e-24	90.22	105.66	328.01	342.45
chr6	113885557	113886747	1191	*	7.66846	6.47571	8.31234	-1.80327	8.51474e-26	8.56668e-24	91.25	86.75	328.01	307.75
chr8	53738275	53739346	1072	*	6.65051	4.2658	7.50532	-3.08774	8.67974e-26	8.72593e-24	18.45	20.02	199.91	163.46
chr9	127048523	127049807	1285	*	8.08537	7.12041	8.65847	-1.51803	8.87746e-26	8.9178e-24	141.48	136.8	401.77	406.38
chr1	20878391	20880651	2261	*	7.55121	8.21047	6.30219	1.87029	9.14504e-26	9.17948e-24	279.89	312.53	74.72	83.1
chr5	134870671	134872208	1538	*	6.48712	7.34797	4.04407	3.14402	9.4428e-26	9.47104e-24	157.89	167.94	17.47	15.52
chr10	24754375	24755240	866	*	7.34358	5.93779	8.04188	-2.05642	9.51284e-26	9.53393e-24	62.54	60.06	265.9	261.18
chr16	28073758	28075215	1458	*	7.22613	7.93657	5.76697	2.11652	9.56624e-26	9.57762e-24	241.96	248.02	50.46	58.45
chr2	176994071	176995673	1603	*	7.58556	8.23564	6.37047	1.83017	9.5712e-26	9.57762e-24	288.09	314.75	80.55	84.93
chr9	91390240	91391710	1471	*	7.46928	6.06139	8.16806	-2.06745	9.60627e-26	9.6053e-24	51.26	82.3	293.08	282.18
chr9	91361591	91362734	1144	*	7.36133	5.95971	8.05865	-2.05005	9.75436e-26	9.74588e-24	66.64	57.83	262.02	271.22
chr1	203524278	203526020	1743	*	8.71508	7.97916	9.20005	-1.20909	9.80576e-26	9.7897e-24	265.54	239.12	590.03	586.28
chr4	77659776	77661317	1542	*	7.48176	6.17226	8.15671	-1.94541	9.85571e-26	9.832e-24	69.72	74.52	294.05	276.7
chr3	5036156	5037744	1589	*	7.688	6.51202	8.32716	-1.78404	9.90825e-26	9.87683e-24	90.22	92.31	330.92	311.4
chr14	71107971	71109690	1720	*	7.77678	8.39784	6.66275	1.70807	9.93809e-26	9.89896e-24	320.9	353.68	106.75	95.89
chr8	52307728	52309323	1596	*	7.65208	6.36919	8.32023	-1.90677	1.02068e-25	1.01588e-23	96.37	68.96	340.63	298.62
chr22	19753386	19754741	1356	*	7.61895	8.2658	6.41556	1.81864	1.02886e-25	1.02324e-23	295.27	320.31	92.19	78.54
chr10	121200318	121201059	742	*	7.59626	6.34766	8.25541	-1.87536	1.04695e-25	1.04043e-23	72.79	90.09	313.46	297.71
chr2	220941036	220943406	2371	*	7.40774	6.02104	8.10156	-2.04041	1.08429e-25	1.07672e-23	55.36	74.52	271.73	277.61
chr20	35082905	35084399	1495	*	7.40895	8.09501	6.05464	1.99768	1.08554e-25	1.07713e-23	253.23	293.62	70.84	62.1
chr14	94432064	94432885	822	*	7.19534	5.6614	7.92188	-2.20177	1.08862e-25	1.07936e-23	52.29	48.94	249.41	235.61
chr12	109881947	109883089	1143	*	6.69317	4.52078	7.52355	-2.87915	1.09655e-25	1.08639e-23	22.56	23.36	185.36	182.64
chr5	1881806	1882872	1067	*	6.41993	7.3085	3.67004	3.42816	1.10364e-25	1.09259e-23	143.53	173.5	13.59	11.87
chr7	129420162	129421054	893	*	6.97737	7.73162	5.30272	2.35777	1.10962e-25	1.09767e-23	207.1	217.99	37.85	41.09
chr9	73203362	73204429	1068	*	7.14354	5.54085	7.88402	-2.28354	1.12423e-25	1.11127e-23	43.06	50.05	222.23	250.22
chr1	242687050	242688690	1641	*	7.12087	7.8652	5.4985	2.30084	1.17374e-25	1.15933e-23	206.07	260.25	46.58	43.83
chr5	9047635	9048435	801	*	6.98013	5.20695	7.75196	-2.46971	1.1936e-25	1.17805e-23	33.83	40.04	202.82	228.3
chr12	65958214	65958909	696	*	6.61649	4.25927	7.46836	-3.05641	1.24048e-25	1.22339e-23	20.5	17.8	183.41	170.77
chr11	125983906	125984725	820	*	7.27774	5.82047	7.98775	-2.11599	1.25453e-25	1.23631e-23	57.41	55.61	246.49	261.18
chr12	19584823	19585918	1096	*	6.81633	4.85294	7.61837	-2.66937	1.2653e-25	1.24598e-23	26.66	31.14	191.18	201.82
chr4	5752871	5753966	1096	*	8.16503	7.23701	8.72518	-1.46937	1.30389e-25	1.28301e-23	153.79	147.92	430.88	415.51
chr10	118896112	118897529	1418	*	7.45925	8.13328	6.15339	1.94062	1.32422e-25	1.30202e-23	263.49	298.07	75.7	66.66
chr4	1185373	1186006	634	*	7.16762	5.61305	7.89842	-2.22363	1.3358e-25	1.31241e-23	52.29	45.6	240.67	236.52
chr17	61510840	61512039	1200	*	7.78083	6.66202	8.40332	-1.71226	1.38414e-25	1.35887e-23	103.55	98.99	348.39	328.75
chr7	108095179	108097240	2062	*	7.70035	8.32755	6.56568	1.73426	1.39342e-25	1.36695e-23	318.85	323.65	99.96	89.49
chr22	29875902	29877760	1859	*	6.91503	7.68627	5.14527	2.4635	1.42097e-25	1.39293e-23	191.72	220.21	38.82	31.96
chr16	1139407	1140981	1575	*	6.96331	7.71787	5.28699	2.36103	1.45437e-25	1.42459e-23	215.3	205.76	38.82	39.27
chr20	31214503	31216142	1640	*	7.28471	7.98284	5.87967	2.05774	1.47677e-25	1.44544e-23	263.49	242.46	61.14	56.62
chr17	41545825	41547637	1813	*	8.04532	7.05743	8.62622	-1.54647	1.48648e-25	1.45384e-23	137.38	129.01	408.56	381.72
chr17	77034988	77035710	723	*	6.94498	5.16284	7.71834	-2.47754	1.5408e-25	1.50585e-23	33.83	37.81	204.76	216.43
chr12	95376295	95377523	1229	*	6.73045	4.6092	7.55433	-2.82074	1.62312e-25	1.5851e-23	27.68	21.13	196.03	179.9
chr15	39563495	39564282	788	*	6.89086	5.02565	7.67789	-2.56471	1.62549e-25	1.58622e-23	31.78	33.37	193.12	216.43
chr6	45623859	45625052	1194	*	7.63927	6.42847	8.28817	-1.82353	1.71186e-25	1.66925e-23	93.3	78.97	303.75	321.45
chr3	14851656	14852864	1209	*	6.55917	7.41245	4.18878	3.06425	1.71863e-25	1.6746e-23	152.76	187.96	14.56	21.92
chr11	78305715	78307246	1532	*	6.87369	5.00473	7.66132	-2.56967	1.72242e-25	1.67703e-23	29.73	34.48	206.71	198.17
chr12	66218590	66220181	1592	*	9.32097	8.75734	9.72522	-0.962542	1.73544e-25	1.68844e-23	430.6	434.87	862.73	830.1
chr12	110384449	110385330	882	*	6.78653	4.79406	7.5928	-2.69524	1.74368e-25	1.69518e-23	27.68	27.8	197.97	188.12
chr8	49531939	49533819	1881	*	7.93794	6.89851	8.53581	-1.61194	1.75446e-25	1.70439e-23	124.05	114.56	384.3	357.98
chr9	90220686	90222254	1569	*	7.03305	5.31482	7.79525	-2.41363	1.76372e-25	1.71144e-23	31.78	47.82	224.17	220.08
chr20	982325	983552	1228	*	6.66665	7.48092	4.61734	2.7568	1.76436e-25	1.71144e-23	180.44	176.84	27.17	21.92
chr5	132947026	132948668	1643	*	6.4738	7.34118	3.96456	3.20784	1.77827e-25	1.72365e-23	149.68	174.61	18.44	12.78
chr4	119909518	119910583	1066	*	7.18548	5.66388	7.90943	-2.18925	1.80928e-25	1.75239e-23	50.24	51.16	240.67	240.17
chr6	134769508	134770416	909	*	6.85266	4.88044	7.65601	-2.67908	1.90362e-25	1.8424e-23	26.66	32.25	181.47	221.91
chr1	2063650	2064922	1273	*	7.97415	6.96424	8.56241	-1.57605	1.92457e-25	1.86126e-23	124.05	125.68	386.24	369.85
chr8	41057998	41059022	1025	*	7.35104	5.96574	8.04453	-2.03397	1.92598e-25	1.86126e-23	60.49	64.51	266.87	261.18
chr17	39560512	39561694	1183	*	7.49747	6.14877	8.18216	-1.98366	1.97105e-25	1.9034e-23	84.07	57.83	295.99	284.92
chr2	19937834	19939713	1880	*	7.5589	6.30057	8.22062	-1.88237	2.01801e-25	1.94729e-23	82.02	75.63	283.37	313.23
chr11	32456245	32457479	1235	*	6.4049	7.28329	3.77604	3.31846	2.13476e-25	2.05842e-23	155.84	155.71	15.53	11.87
chr7	134376810	134378125	1316	*	7.79564	6.68864	8.41458	-1.70047	2.15473e-25	2.07614e-23	98.42	107.88	329.95	352.5
chr2	27070388	27072931	2544	*	7.37422	8.05913	6.0246	1.99267	2.17553e-25	2.09463e-23	254.26	279.16	70.84	59.36
chr1	235105447	235107444	1998	*	8.633	7.87451	9.12755	-1.24011	2.18206e-25	2.09936e-23	249.13	220.21	557.04	561.62
chr14	27066804	27067997	1194	*	6.70115	7.51064	4.6861	2.7135	2.22302e-25	2.13718e-23	184.54	180.18	21.35	30.14
chr22	43738537	43740283	1747	*	7.07496	7.83334	5.37789	2.37575	2.23936e-25	2.1513e-23	208.12	248.02	32.02	51.14
chr10	81741203	81742320	1118	*	7.40276	8.09184	6.03591	2.00707	2.29379e-25	2.20196e-23	254.26	291.4	57.26	73.97
chr6	156348328	156350401	2074	*	6.86046	4.95386	7.65397	-2.60829	2.31879e-25	2.22431e-23	29.73	32.25	187.3	215.52
chr13	24365211	24365792	582	*	6.67032	4.4882	7.50191	-2.88791	2.3654e-25	2.26734e-23	21.53	23.36	185.36	177.16
chr2	240385529	240387224	1696	*	6.54474	7.38346	4.30376	2.94418	2.40533e-25	2.30391e-23	167.11	166.83	19.41	20.09
chr6	169561858	169563084	1227	*	8.54853	7.77479	9.04943	-1.2639	2.47577e-25	2.36963e-23	212.22	225.78	532.78	526.92
chr16	87240424	87241904	1481	*	7.10906	5.52214	7.84642	-2.26309	2.49286e-25	2.38424e-23	44.09	47.82	232.91	227.39
chr19	39863268	39864343	1076	*	7.33373	5.94086	8.02901	-2.04254	2.5297e-25	2.41769e-23	59.46	63.4	263.96	258.44
chr16	1967760	1968928	1169	*	6.68837	7.49467	4.69569	2.69627	2.53673e-25	2.42263e-23	179.42	181.29	27.17	24.66
chr6	30523081	30525548	2468	*	9.28264	8.70876	9.69211	-0.976882	2.5459e-25	2.4296e-23	427.52	409.29	846.23	808.19
chr3	16144805	16145928	1124	*	6.90107	5.05575	7.68491	-2.54726	2.57452e-25	2.4551e-23	28.71	37.81	196.03	215.52
chr5	73121139	73122948	1810	*	7.44042	6.10574	8.12166	-1.97352	2.62367e-25	2.50014e-23	67.67	70.07	294.05	263
chr3	45207551	45209677	2127	*	7.94388	6.92619	8.5347	-1.58566	2.68924e-25	2.56073e-23	122	121.23	374.59	367.11
chr2	192499880	192501604	1725	*	7.28857	5.8291	7.99907	-2.11389	2.74851e-25	2.61526e-23	62.54	51.16	267.84	243.83
chr5	34498710	34500307	1598	*	7.50323	6.23418	8.16777	-1.89632	2.83136e-25	2.69212e-23	73.82	76.74	291.13	284.01
chr6	132453105	132454496	1392	*	7.20937	5.70338	7.93	-2.16755	2.87046e-25	2.72729e-23	56.39	47.82	249.41	238.35
chr2	36959585	36960644	1060	*	6.56745	4.09588	7.43115	-3.1675	2.89365e-25	2.74731e-23	16.4	17.8	185.36	159.81
chr22	50063817	50064972	1156	*	6.31716	7.24761	2.90804	3.98662	2.92918e-25	2.77902e-23	153.79	150.15	6.79	8.22
chr9	1207987	1209458	1472	*	6.91152	5.11734	7.68692	-2.488	2.95479e-25	2.80127e-23	33.83	35.59	205.74	206.38
chr12	2392766	2394409	1644	*	8.07	7.08632	8.64948	-1.5407	3.03919e-25	2.87918e-23	139.43	132.35	425.06	378.07
chr9	125207763	125208747	985	*	6.90714	5.03485	7.69529	-2.56081	3.1149e-25	2.94825e-23	39.98	25.58	215.44	199.08
chr1	60279911	60281309	1399	*	6.92888	7.70388	5.13708	2.48028	3.11664e-25	2.94825e-23	184.54	232.45	32.02	38.35
chr5	119741301	119743292	1992	*	6.97088	5.2448	7.73448	-2.41513	3.17947e-25	3.00549e-23	36.91	38.93	207.68	218.26
chr11	106913398	106914359	962	*	6.61669	4.34071	7.45949	-2.97771	3.19303e-25	3.01441e-23	20.5	20.02	177.59	174.42
chr11	117698681	117700230	1550	*	7.53828	8.1987	6.2849	1.8807	3.19355e-25	3.01441e-23	297.32	290.28	89.28	66.66
chr16	65103595	65104501	907	*	7.1105	5.46057	7.86012	-2.33769	3.22617e-25	3.04298e-23	36.91	51.16	214.47	250.22
chr14	25579101	25581215	2115	*	7.5837	6.35595	8.23724	-1.84892	3.3406e-25	3.14735e-23	74.84	88.98	307.63	295.88
chr2	101358290	101359819	1530	*	7.32431	5.89483	8.02807	-2.07928	3.34167e-25	3.14735e-23	65.62	53.39	273.67	248.39
chr4	159732390	159733599	1210	*	7.29294	5.84228	8.00148	-2.11182	3.35437e-25	3.15703e-23	50.24	64.51	266.87	245.65
chr5	55753212	55755011	1800	*	7.51526	6.24645	8.17974	-1.89772	3.44673e-25	3.2416e-23	71.77	80.08	279.49	300.44
chr12	127153321	127154676	1356	*	6.91107	5.08668	7.6915	-2.51493	3.4636e-25	3.25511e-23	37.93	30.03	197	216.43
chr9	101615156	101616659	1504	*	6.88076	5.04818	7.66253	-2.52817	3.47637e-25	3.26474e-23	32.81	33.37	197	208.21
chr1	20062649	20063485	837	*	7.00381	5.3085	7.76187	-2.38371	3.50888e-25	3.29289e-23	35.88	43.38	222.23	211.86
chr11	1594495	1595372	878	*	6.82221	7.60529	4.98159	2.537	3.56907e-25	3.34696e-23	181.47	207.98	33.97	29.22
chr19	7993982	7994759	778	*	7.29363	5.87296	7.99536	-2.07181	3.76377e-25	3.52468e-23	60.49	56.72	261.05	249.31
chr14	35853952	35855517	1566	*	8.33163	7.48267	8.86251	-1.36604	3.76402e-25	3.52468e-23	175.32	182.4	455.14	475.78
chr10	88125453	88127506	2054	*	8.25603	8.79324	7.39049	1.38618	3.88326e-25	3.63372e-23	435.73	451.55	162.06	173.51
chr22	43807405	43808557	1153	*	6.37343	7.26303	3.6106	3.43188	3.9915e-25	3.73231e-23	141.48	165.72	11.65	12.78
chr2	75078659	75079713	1055	*	7.21782	5.73385	7.93371	-2.14359	4.03516e-25	3.77042e-23	56.39	50.05	239.7	249.31
chr20	61292701	61293847	1147	*	7.58294	6.35442	8.23668	-1.84956	4.08258e-25	3.81199e-23	76.89	86.75	288.22	315.06
chr2	23633144	23634664	1521	*	7.32932	5.84555	8.04516	-2.15072	4.1706e-25	3.89137e-23	47.16	67.84	286.28	242
chr16	3054160	3054639	480	*	6.63948	7.45515	4.57993	2.75924	4.21449e-25	3.9295e-23	176.34	174.61	21.35	26.48
chr3	171518488	171519653	1166	*	7.6166	6.40099	8.26682	-1.82776	4.23748e-25	3.94809e-23	92.27	76.74	318.31	297.71
chr22	45849237	45850301	1065	*	7.53224	6.23484	8.20411	-1.9238	4.2407e-25	3.94827e-23	86.12	64.51	307.63	282.18
chr10	45202479	45203251	773	*	6.88984	5.05575	7.67186	-2.53374	4.28555e-25	3.98716e-23	28.71	37.81	210.59	197.25
chr9	129784248	129786024	1777	*	7.10728	5.52487	7.84373	-2.25911	4.31659e-25	4.01316e-23	42.03	50.05	233.88	225.56
chr1	53576444	53577207	764	*	7.1291	5.54729	7.86544	-2.25134	4.35392e-25	4.04497e-23	51.26	42.26	243.58	222.82
chr6	126398402	126399409	1008	*	6.57782	4.19366	7.43257	-3.09073	4.37055e-25	4.05752e-23	14.35	22.24	175.65	169.86
chr9	110500786	110501499	714	*	7.36801	5.99983	8.05741	-2.01252	4.4246e-25	4.10476e-23	64.59	63.4	254.26	278.53
chr1	94791936	94793259	1324	*	7.80471	6.71166	8.4194	-1.67866	4.50987e-25	4.18088e-23	111.75	97.87	337.72	347.02
chr3	107850291	107851573	1283	*	6.82749	4.92154	7.62089	-2.60059	4.57384e-25	4.23715e-23	32.81	27.8	202.82	190.86
chr3	192126621	192128105	1485	*	6.4819	7.34273	4.03905	3.13491	4.63134e-25	4.28736e-23	145.58	179.06	15.53	17.35
chr19	15410140	15411139	1000	*	7.39924	6.01987	8.09132	-2.02352	4.70761e-25	4.35486e-23	69.72	60.06	252.32	293.14
chr8	59508508	59509834	1327	*	7.23697	5.72795	7.95826	-2.16757	4.73678e-25	4.37872e-23	61.51	44.49	258.14	239.26
chr9	117038250	117039712	1463	*	7.98548	6.95689	8.57984	-1.6019	4.77341e-25	4.40944e-23	112.78	135.69	402.74	362.54
chr1	10510147	10511687	1541	*	7.12446	5.50843	7.86755	-2.2858	4.81376e-25	4.44355e-23	54.34	36.7	239.7	227.39
chr1	56183493	56184490	998	*	6.94781	5.20355	7.71463	-2.43344	4.91792e-25	4.53647e-23	35.88	37.81	217.38	202.73
chr8	40381018	40381879	862	*	6.58638	4.25927	7.43495	-3.02419	5.00621e-25	4.61464e-23	20.5	17.8	169.83	176.25
chr17	76930524	76931634	1111	*	8.50981	7.72955	9.01339	-1.27172	5.09926e-25	4.69708e-23	214.27	210.21	507.54	526.01
chr19	36009503	36010892	1390	*	7.39548	6.03887	8.0821	-1.9998	5.13026e-25	4.72228e-23	62.54	68.96	286.28	255.7
chr6	391317	393928	2612	*	7.67114	8.3022	6.52331	1.74607	5.14985e-25	4.73608e-23	306.55	324.76	84.43	99.54
chr21	47498520	47499365	846	*	7.84328	6.78124	8.44834	-1.64228	5.15256e-25	4.73608e-23	107.65	112.33	356.15	342.45
chr9	140189381	140191101	1721	*	7.74435	8.36042	6.6468	1.68547	5.16817e-25	4.74707e-23	314.75	342.56	99.96	100.45
chr2	223987902	223989995	2094	*	7.01683	5.33172	7.77302	-2.37487	5.17312e-25	4.74826e-23	33.83	46.71	217.38	220.08
chr14	61787795	61789512	1718	*	7.55324	8.19853	6.35547	1.80923	5.23177e-25	4.7987e-23	285.02	302.52	82.49	81.28
chr12	94017451	94018884	1434	*	7.74594	6.6244	8.36924	-1.71533	5.33289e-25	4.88799e-23	99.45	97.87	343.54	317.8
chr21	42732944	42735093	2150	*	7.81431	6.73915	8.42348	-1.65947	5.35253e-25	4.90253e-23	103.55	110.11	339.66	347.02
chr14	69044851	69045954	1104	*	7.23582	5.77724	7.94612	-2.11453	5.39257e-25	4.93573e-23	57.41	52.27	249.41	243.83
chr17	77416646	77418297	1652	*	6.60099	7.42242	4.4985	2.80643	5.60091e-25	5.1228e-23	177.37	165.72	23.29	21.92
chr1	94166347	94168686	2340	*	8.78295	8.06448	9.26038	-1.18884	5.61628e-25	5.13324e-23	244.01	291.4	605.56	620.98
chr1	230560908	230562365	1458	*	7.23915	7.94463	5.80208	2.08814	5.67073e-25	5.17936e-23	235.8	256.92	49.49	62.1
chr10	47056147	47057364	1218	*	8.53458	7.74582	9.04164	-1.28593	5.69672e-25	5.19944e-23	196.85	232.45	528.89	525.09
chr7	2555790	2556800	1011	*	7.60635	6.41634	8.24946	-1.80073	5.83323e-25	5.31989e-23	84.07	86.75	301.81	306.84
chr4	129163036	129164080	1045	*	7.0311	5.37222	7.7824	-2.33575	5.83689e-25	5.31989e-23	46.14	36.7	219.32	221
chr9	1051472	1052449	978	*	6.97624	7.73474	5.2785	2.37773	5.84958e-25	5.32664e-23	222.48	203.53	31.05	46.57
chr19	47466596	47467328	733	*	6.87377	5.05197	7.65377	-2.51811	5.85251e-25	5.32664e-23	30.76	35.59	201.85	200.91
chr5	1155361	1156551	1191	*	6.64804	7.46113	4.60721	2.73866	5.89872e-25	5.36494e-23	172.24	180.18	21.35	27.4
chr15	77435452	77437026	1575	*	7.51663	6.24975	8.1806	-1.89674	5.95983e-25	5.41672e-23	67.67	84.53	285.31	294.97
chr9	124665208	124665866	659	*	6.58972	4.26906	7.43757	-3.02359	5.97987e-25	5.43114e-23	17.43	21.13	180.5	166.2
chr20	39937380	39939015	1636	*	7.68804	6.52473	8.32357	-1.76493	6.22152e-25	5.64493e-23	97.4	86.75	334.8	305.92
chr12	8394869	8395606	738	*	7.99894	7.00755	8.58102	-1.55207	6.22396e-25	5.64493e-23	126.1	131.24	397.88	368.02
chr3	188349371	188350622	1252	*	7.02321	5.33606	7.77977	-2.36801	6.256e-25	5.67002e-23	44.09	36.7	205.74	233.78
chr16	87261002	87262598	1597	*	7.55863	6.34149	8.20927	-1.8329	6.57031e-25	5.95074e-23	80.99	81.19	296.96	294.97
chr15	71998809	71999642	834	*	6.90133	5.03142	7.6891	-2.57145	6.63389e-25	6.00414e-23	28.71	36.7	185.36	227.39
chr2	118737376	118738470	1095	*	6.96802	5.24975	7.73023	-2.40834	6.66062e-25	6.02413e-23	33.83	42.26	217.38	207.3
chr8	37727907	37729064	1158	*	7.02937	5.31133	7.79154	-2.3965	6.83944e-25	6.18155e-23	47.16	32.25	235.82	207.3
chr2	95999997	96000799	803	*	6.79423	4.85294	7.593	-2.64368	6.99403e-25	6.31687e-23	26.66	31.14	183.41	202.73
chr22	38850601	38852141	1541	*	7.98308	8.55983	7.00742	1.53329	7.28126e-25	6.57171e-23	385.49	369.25	135.86	121.46
chr14	102965828	102967532	1705	*	8.12909	7.18171	8.69608	-1.49847	7.31873e-25	6.60094e-23	130.21	160.16	407.59	421.9
chr1	229894464	229895965	1502	*	7.09475	5.50734	7.83221	-2.26431	7.35313e-25	6.62736e-23	42.03	48.94	218.35	237.43
chr19	8399279	8400709	1431	*	7.2984	7.98432	5.94461	1.9948	7.38326e-25	6.6499e-23	257.33	249.13	60.17	63.01
chr12	97271761	97272523	763	*	6.60688	4.2428	7.45949	-3.04738	7.45027e-25	6.7056e-23	25.63	12.23	177.59	174.42
chr13	32786922	32787656	735	*	6.71772	4.59683	7.54155	-2.83129	7.51114e-25	6.75571e-23	19.48	28.92	170.8	201.82
chr18	71591297	71592630	1334	*	6.86868	4.94371	7.66499	-2.617	7.58002e-25	6.81294e-23	34.86	26.69	224.17	181.73
chr17	32579027	32580051	1025	*	7.46115	6.16791	8.13196	-1.9229	7.62739e-25	6.85077e-23	74.84	68.96	268.81	292.23
chr3	50711720	50712987	1268	*	7.30308	7.99434	5.92714	2.02219	7.67539e-25	6.88912e-23	241.96	268.04	65.99	55.71
chr4	5159823	5161075	1253	*	6.87375	5.04438	7.65499	-2.52121	7.74727e-25	6.94882e-23	34.86	31.14	192.15	210.95
chr2	31605657	31607005	1349	*	7.62095	6.42643	8.26533	-1.80719	7.77384e-25	6.96784e-23	83.04	88.98	292.11	323.27
chr1	162943700	162944946	1247	*	6.55096	4.14914	7.40757	-3.10525	7.86481e-25	7.04451e-23	14.35	21.13	167.89	171.68
chr5	142915204	142917031	1828	*	7.64076	6.46454	8.27998	-1.78093	8.0734e-25	7.22636e-23	94.32	82.3	305.69	315.97
chr18	31157715	31159271	1557	*	7.21243	7.91554	5.78577	2.08079	8.36682e-25	7.48383e-23	233.75	249.13	59.2	51.14
chr2	121372068	121372930	863	*	7.81391	6.69869	8.43532	-1.7059	8.56248e-25	7.65357e-23	107.65	100.1	373.62	318.71
chr1	234858092	234859067	976	*	7.93026	6.87339	8.53369	-1.63078	8.6654e-25	7.74023e-23	133.28	101.21	365.86	375.33
chrX	119894737	119895771	1035	*	6.47758	3.85727	7.35522	-3.30791	8.72964e-25	7.79225e-23	12.3	16.68	164.01	163.46
chr6	34597363	34598794	1432	*	7.09067	5.52078	7.8246	-2.24211	8.80002e-25	7.84968e-23	45.11	46.71	224.17	229.21
chr11	94527055	94527987	933	*	7.07824	5.47163	7.8195	-2.28465	8.98358e-25	8.00791e-23	42.03	46.71	212.53	239.26
chr14	103394444	103397077	2634	*	8.58519	9.07048	7.84856	1.2113	9.1736e-25	8.17168e-23	540.3	534.97	229.03	231.95
chr19	43379989	43380891	903	*	7.84334	6.77553	8.45022	-1.64602	9.1992e-25	8.18887e-23	117.9	101.21	356.15	343.37
chr10	118368500	118369693	1194	*	6.42187	7.28522	3.95394	3.15861	9.23347e-25	8.21374e-23	164.04	147.92	14.56	16.44
chr8	48986137	48987938	1802	*	7.3029	5.91242	7.99762	-2.03667	9.25718e-25	8.22919e-23	61.51	58.95	259.11	252.04
chr1	92074494	92075873	1380	*	7.5974	6.40115	8.24227	-1.80993	9.27522e-25	8.23958e-23	78.94	90.09	296.96	308.66
chr16	85396825	85397543	719	*	6.84934	4.97952	7.63711	-2.56811	9.29793e-25	8.2541e-23	29.73	33.37	185.36	212.78
chr4	85418555	85419782	1228	*	6.97162	7.71465	5.35597	2.2927	9.47789e-25	8.40812e-23	213.25	206.87	41.73	40.18
chr10	50384755	50386374	1620	*	7.59466	6.35272	8.25202	-1.85872	9.55069e-25	8.4669e-23	92.27	71.18	289.19	320.54
chr11	3743373	3744184	812	*	6.59962	4.3164	7.44326	-2.9918	9.5806e-25	8.48327e-23	15.38	24.47	172.74	175.34
chr3	61614634	61616180	1547	*	6.83111	4.8633	7.63381	-2.65853	9.58222e-25	8.48327e-23	34.86	23.36	216.41	180.81
chr22	39890087	39891481	1395	*	7.16997	5.6614	7.89116	-2.17086	9.60003e-25	8.49324e-23	52.29	48.94	246.49	228.3
chr8	118860171	118861664	1494	*	7.48398	6.22181	8.14672	-1.88588	9.72223e-25	8.59549e-23	75.87	73.4	289.19	277.61
chr19	624280	625139	860	*	7.50697	6.25698	8.16648	-1.87452	9.78877e-25	8.64843e-23	71.77	81.19	282.4	292.23
chr1	42136472	42138521	2050	*	8.32299	7.44892	8.8634	-1.40194	9.88508e-25	8.72758e-23	154.81	194.63	464.85	466.65
chr2	235587406	235588633	1228	*	7.18488	5.6879	7.90359	-2.15598	9.91022e-25	8.74384e-23	56.39	46.71	238.73	240.17
chr14	61645818	61646621	804	*	6.95281	5.23019	7.7158	-2.41345	1.00345e-24	8.84747e-23	32.81	42.26	207.68	212.78
chr12	5608024	5608831	808	*	6.75504	4.76715	7.56065	-2.68886	1.02098e-24	8.99592e-23	26.66	27.8	177.59	199.99
chr20	21502055	21503725	1671	*	6.50794	7.34604	4.27216	2.93764	1.03036e-24	9.07244e-23	163.01	162.38	20.38	18.26
chr5	171559491	171561338	1848	*	7.62839	6.45828	8.26588	-1.77442	1.03471e-24	9.10454e-23	90.22	85.64	311.51	304.1
chr13	98531453	98532339	887	*	6.91193	5.15758	7.68051	-2.44121	1.05491e-24	9.27596e-23	36.91	34.48	205.74	204.56
chr12	106065854	106066725	872	*	7.05481	5.42482	7.80061	-2.3022	1.09532e-24	9.62479e-23	49.21	36.7	221.26	224.65
chr11	46315663	46316315	653	*	7.66576	6.51873	8.29658	-1.74635	1.1035e-24	9.69011e-23	93.3	90.09	319.28	309.58
chr9	38441684	38443276	1593	*	7.00313	7.74225	5.40733	2.27244	1.12494e-24	9.8717e-23	222.48	205.76	45.61	39.27
chr16	68678846	68680314	1469	*	7.82481	8.42771	6.76962	1.6315	1.14323e-24	1.00254e-22	325	363.69	107.72	110.5
chr2	45405567	45406233	667	*	6.58511	4.31008	7.4278	-2.97902	1.14646e-24	1.0047e-22	17.43	22.24	171.77	172.6
chr1	201252128	201253716	1589	*	7.36541	8.04615	6.03279	1.9697	1.14968e-24	1.00684e-22	245.03	283.61	67.93	63.01
chr2	242785489	242787406	1918	*	8.01466	8.58626	7.054	1.51021	1.15553e-24	1.01128e-22	378.31	390.38	124.22	141.55
chr15	34786519	34788347	1829	*	6.76055	7.54863	4.88873	2.56753	1.17299e-24	1.02587e-22	200.95	173.5	29.11	30.14
chr5	79864854	79866578	1725	*	7.22382	7.92139	5.82116	2.05231	1.18297e-24	1.0339e-22	236.83	248.02	59.2	53.88
chr18	394129	394954	826	*	6.7263	4.69059	7.53869	-2.74379	1.21532e-24	1.06146e-22	20.5	31.14	189.24	182.64
chr9	100984485	100985663	1179	*	8.18973	7.29595	8.73748	-1.42593	1.21784e-24	1.06295e-22	149.68	164.61	429.91	423.73
chr4	186048482	186050083	1602	*	7.6331	8.26511	6.482	1.75304	1.24003e-24	1.08158e-22	325	290.28	89.28	89.49
chr2	47304325	47305333	1009	*	7.68014	6.53153	8.31143	-1.75147	1.24734e-24	1.08723e-22	87.15	97.87	305.69	329.67
chr12	109249780	109251403	1624	*	9.28199	8.71734	9.68677	-0.965204	1.29202e-24	1.12542e-22	408.04	433.76	804.5	843.8
chr2	119006847	119008331	1485	*	7.62574	6.41765	8.27388	-1.81709	1.29961e-24	1.13127e-22	95.35	75.63	323.16	295.88
chr16	75352962	75353841	880	*	7.08274	5.46738	7.8257	-2.28955	1.35604e-24	1.1796e-22	45.11	43.38	245.52	208.21
chr3	187085391	187087235	1845	*	7.61346	6.43573	8.25311	-1.78573	1.36564e-24	1.18716e-22	83.04	90.09	312.48	297.71
chr2	19848525	19849529	1005	*	6.70817	4.67349	7.52041	-2.73101	1.38414e-24	1.20243e-22	27.68	23.36	187.3	179.9
chr15	101729056	101729777	722	*	7.56927	6.36707	8.21579	-1.81287	1.40459e-24	1.21938e-22	86.12	78.97	295.99	298.62
chr1	26033704	26034910	1207	*	6.74317	4.76715	7.54707	-2.67581	1.44962e-24	1.25764e-22	26.66	27.8	179.53	194.51
chr17	45357004	45358206	1203	*	7.31961	5.94879	8.00965	-2.01289	1.47725e-24	1.28075e-22	64.59	58.95	254.26	261.18
chr8	131244005	131244874	870	*	6.80659	4.92361	7.59642	-2.57599	1.47826e-24	1.28077e-22	31.78	28.92	198.94	188.12
chr11	66494680	66496438	1759	*	8.155	8.70306	7.26038	1.42451	1.52362e-24	1.31919e-22	400.87	432.64	151.39	155.24
chr7	40854646	40856155	1510	*	7.10326	5.49795	7.84426	-2.28786	1.52725e-24	1.32145e-22	35.88	54.5	221.26	238.35
chr1	157075199	157077644	2446	*	8.43428	7.63932	8.94386	-1.29119	1.55595e-24	1.34538e-22	203	195.75	488.14	496.78
chr11	69234486	69236232	1747	*	8.50271	7.72577	9.00493	-1.2662	1.57476e-24	1.36074e-22	214.27	209.09	528.89	498.61
chr19	54484984	54486320	1337	*	7.64136	8.2808	6.46439	1.78091	1.57684e-24	1.36163e-22	285.02	337	83.46	93.15
chr17	17893263	17894342	1080	*	7.43987	6.16109	8.10694	-1.90705	1.59841e-24	1.37934e-22	69.72	73.4	275.61	275.79
chr6	158137966	158138609	644	*	6.77639	4.81603	7.578	-2.65544	1.60529e-24	1.38436e-22	30.76	25.58	177.59	204.56
chr17	42186297	42189003	2707	*	8.94879	8.3043	9.39269	-1.08059	1.6253e-24	1.4005e-22	321.92	310.3	652.14	692.21
chr1	29522185	29523372	1188	*	6.93851	5.21844	7.70104	-2.40201	1.62617e-24	1.4005e-22	39.98	34.48	212.53	203.64
chr19	18475015	18477066	2052	*	8.59043	7.82817	9.08656	-1.24903	1.64034e-24	1.41177e-22	214.27	240.23	521.13	566.19
chr3	40120105	40121264	1160	*	6.72976	4.73739	7.53602	-2.69151	1.68608e-24	1.45017e-22	26.66	26.69	177.59	193.6
chr1	222544940	222546248	1309	*	7.05651	5.46454	7.79488	-2.26248	1.73039e-24	1.4873e-22	47.16	41.15	222.23	221.91
chr20	2672793	2674778	1986	*	8.21046	8.75789	7.31752	1.42575	1.76689e-24	1.51766e-22	439.83	425.97	175.65	143.37
chr6	112565394	112567082	1689	*	7.61209	6.41854	8.2562	-1.8062	1.77267e-24	1.52136e-22	80.99	90.09	288.22	323.27
chr1	65713698	65715063	1366	*	7.32305	5.91554	8.02175	-2.05691	1.77353e-24	1.52136e-22	58.44	62.28	281.43	238.35
chr2	19779572	19781053	1482	*	7.05504	5.44338	7.79728	-2.28204	1.78788e-24	1.53265e-22	49.21	37.81	219.32	225.56
chr14	90310672	90311327	656	*	6.57812	4.26906	7.42468	-3.0105	1.80185e-24	1.54361e-22	17.43	21.13	159.15	184.47
chr2	192730895	192732597	1703	*	7.43892	6.13671	8.11202	-1.9324	1.83531e-24	1.57105e-22	71.77	68.96	293.08	260.26
chr17	81042196	81042959	764	*	7.90483	6.89441	8.49325	-1.57586	1.8363e-24	1.57105e-22	118.93	119.01	359.07	361.63
chr14	93112478	93113166	689	*	6.84829	4.98745	7.63462	-2.56241	1.85648e-24	1.58726e-22	25.63	37.81	189.24	208.21
chr14	51861347	51862900	1554	*	8.3042	7.43203	8.84391	-1.39233	1.93383e-24	1.65231e-22	189.67	155.71	469.7	449.3
chr1	60102717	60104942	2226	*	6.95387	5.26417	7.7109	-2.3722	1.93708e-24	1.65399e-22	37.93	38.93	214.47	204.56
chr12	31670568	31671637	1070	*	7.08012	5.51667	7.81275	-2.23134	1.97757e-24	1.68746e-22	48.19	43.38	223.2	226.47
chr1	221130926	221131941	1016	*	6.74722	4.76715	7.5517	-2.67822	1.98e-24	1.68842e-22	26.66	27.8	199.91	175.34
chr18	34982655	34984218	1564	*	8.19678	7.30096	8.74527	-1.4254	1.99057e-24	1.69632e-22	163.01	152.37	446.41	411.86
chr14	38678246	38680362	2117	*	8.79984	8.10579	9.26647	-1.15372	2.03022e-24	1.72898e-22	257.33	293.62	600.71	631.03
chr7	20836889	20838391	1503	*	7.08819	7.80839	5.58424	2.16706	2.06149e-24	1.75446e-22	234.78	213.54	47.55	48.4
chr21	28795832	28797233	1402	*	6.89586	5.08852	7.67346	-2.49563	2.08787e-24	1.77575e-22	36.91	31.14	187.3	221
chr5	68788096	68790094	1999	*	8.23486	8.76672	7.38336	1.3675	2.09091e-24	1.77716e-22	429.57	441.54	164.98	168.94
chr2	46075666	46077169	1504	*	6.86936	5.07409	7.64495	-2.48781	2.10964e-24	1.79191e-22	31.78	35.59	191.18	209.12
chr1	111734452	111736092	1641	*	7.50502	6.27133	8.16016	-1.85081	2.11386e-24	1.79432e-22	79.97	74.52	286.28	285.83
chr1	212841561	212842228	668	*	6.70958	4.68816	7.51997	-2.72657	2.12881e-24	1.80583e-22	21.53	30.03	185.36	181.73
chr8	11565735	11566850	1116	*	6.38651	7.25575	3.8578	3.20753	2.14939e-24	1.8221e-22	146.61	159.04	11.65	17.35
chr9	16963675	16964337	663	*	6.51212	4.09588	7.37022	-3.11007	2.17292e-24	1.84084e-22	16.4	17.8	160.12	170.77
chr15	86211583	86212468	886	*	6.60603	4.40898	7.43947	-2.89171	2.19367e-24	1.85721e-22	23.58	18.91	172.74	174.42
chr3	187036806	187037947	1142	*	7.10641	5.52595	7.84247	-2.24555	2.22072e-24	1.87888e-22	54.34	37.81	227.09	231.95
chr1	192527596	192528603	1008	*	6.7849	4.86545	7.58037	-2.60932	2.23947e-24	1.89351e-22	33.83	24.47	188.27	194.51
chr5	95555031	95556270	1240	*	7.32737	5.95971	8.01666	-2.00821	2.25034e-24	1.90147e-22	66.64	57.83	250.38	267.57
chr17	64546191	64546888	698	*	6.72772	4.70699	7.53801	-2.7194	2.25628e-24	1.90524e-22	26.66	25.58	170.8	200.91
chr10	99530701	99532033	1333	*	6.74929	7.53247	4.90804	2.53094	2.27032e-24	1.91585e-22	184.54	185.74	27.17	32.88
chr11	44863129	44863893	765	*	6.58274	4.34689	7.42085	-2.93751	2.35618e-24	1.98702e-22	18.45	22.24	174.68	168.03
chr21	38282500	38283838	1339	*	8.09415	7.14974	8.6601	-1.4878	2.38694e-24	2.01165e-22	152.76	131.24	417.29	391.77
chr22	40390454	40391516	1063	*	6.97707	7.72233	5.34991	2.2994	2.39441e-24	2.01664e-22	199.92	222.44	35.91	45.66
chr9	113411767	113413447	1681	*	7.55249	6.35058	8.19893	-1.81374	2.39621e-24	2.01684e-22	82.02	81.19	287.25	300.44
chr18	43381300	43382837	1538	*	7.68308	6.55983	8.30689	-1.71656	2.49228e-24	2.09635e-22	96.37	92.31	318.31	315.06
chr10	4394277	4396711	2435	*	7.54215	6.31842	8.19459	-1.83722	2.50061e-24	2.10199e-22	85.09	74.52	303.75	282.18
chr11	78947050	78948932	1883	*	7.73611	6.56949	8.3726	-1.76558	2.50416e-24	2.10361e-22	107.65	82.3	354.21	308.66
chr8	141735224	141735834	611	*	6.63002	4.47979	7.45761	-2.84562	2.53889e-24	2.1314e-22	24.61	20.02	169.83	181.73
chr9	133535113	133536665	1553	*	7.19817	7.90093	5.77303	2.07735	2.5913e-24	2.17399e-22	225.55	252.47	58.23	51.14
chr2	131812764	131813465	702	*	6.75379	4.82269	7.55103	-2.62832	2.63084e-24	2.20574e-22	27.68	28.92	181.47	193.6
chr19	12996189	12997134	946	*	6.7575	7.53714	4.93792	2.51247	2.63798e-24	2.2103e-22	183.52	187.96	33	28.31
chr3	10857457	10858582	1126	*	6.26541	7.17911	3.15915	3.7242	2.67976e-24	2.24386e-22	136.36	153.48	8.73	9.13
chr3	72203717	72204856	1140	*	7.13366	5.62199	7.85551	-2.17781	2.68831e-24	2.24957e-22	45.11	53.39	235.82	227.39
chr2	67516408	67517711	1304	*	6.85468	4.86545	7.66048	-2.68228	2.76216e-24	2.30987e-22	33.83	24.47	171.77	232.87
chr18	32288448	32289988	1541	*	7.36293	6.03314	8.04297	-1.96449	2.78849e-24	2.33039e-22	68.69	62.28	257.17	270.31
chr3	55204882	55205432	551	*	6.74363	4.72321	7.55388	-2.70983	2.79242e-24	2.33217e-22	32.81	20.02	178.56	197.25
chr15	101419205	101420950	1746	*	8.5368	9.02885	7.78427	1.2335	2.80472e-24	2.34094e-22	507.49	537.19	229.03	211.86
chr8	126648837	126649777	941	*	7.02597	5.41193	7.76868	-2.28695	2.83581e-24	2.36536e-22	45.11	40.04	210.59	225.56
chr16	88275466	88276291	826	*	7.44503	6.16547	8.11231	-1.91005	2.85302e-24	2.3782e-22	64.59	78.97	279.49	273.96
chr8	49816328	49817035	708	*	6.64728	4.55264	7.46766	-2.79315	2.85628e-24	2.37938e-22	23.58	23.36	180.5	173.51
chr5	11903564	11904938	1375	*	6.52276	7.36761	4.22887	2.98484	2.87578e-24	2.39409e-22	144.56	185.74	16.5	21
chr1	20060829	20062433	1605	*	7.51078	6.27133	8.16748	-1.85811	2.88285e-24	2.39844e-22	79.97	74.52	273.67	301.36
[truncated: 128,227 more rows]

## Sheet: HCMV_vs_UI_deseq2_TEAD1
seqnames	start	end	width	strand	Conc	Conc_HCMV	Conc_UI	Log2FoldChange	p.value	FDR	TEAD1_HCMV_Rep1	TEAD1_HCMV_Rep2	TEAD1_UI_Rep1	TEAD1_UI_Rep2
[truncated: 79,275 more rows]

[truncated: 9 more sheets: HCMV_closed_CTCF, HCMV_opened_CTCF, unchanged_CTCF, HCMV_closed_H3K27ac, HCMV_opened_H3K27ac, unchanged_H3K27ac, HCMV_closed_TEAD1, HCMV_opened_TEAD1, unchanged_TEAD1]
