# Supplementary material for: Human cytomegalovirus infection coopts chromatin organization to diminish TEAD1 transcription factor activity
Source: bioRxiv preprint, doi:10.1101/2024.04.12.588762, version 4 (2025-06-02)
Supplement: Supplemental Dataset 11 [file 588762_file27.xlsx]

## Sheet: README
Human cytomegalovirus extensively re-organizes the human genome, diminishing TEAD1 transcription factor activity
This document contains Differentially Expressed Genes (DEG) from RNA-seq datasets.
Comments, additions, or subtractions should be addressed to the corresponding authors:
Leah Kottyan (Leah.Kottyan@cchmc.org)
Matt Weirauch (Matthew.Weirauch@cchmc.org)
Sheet name	Link
DEG	Go to sheet
DEG CMV genes	Go to sheet
Insignificant	Go to sheet
Low Count	Go to sheet
Zero Count	Go to sheet
Classification Definitions	Go to sheet
DESeq2 Summary	Go to sheet
DESeq2 Params	Go to sheet
Rules for classifying genes in DESeq2 results
Classification	baseMean	log2FoldChange	pvalue	padj	Notes
Zero Count	= 0	NA	NA	NA	Zero count genes are removed from consideration prior to statistical analysis.
Outlier	> 0	Exists	NA	NA	The gene is considered to be an outlier and is censured from analysis.
Low Count	> 0	Exists	Exists	NA	An independent filtering step is performed prior to analysis that tries to establish a threshold for 'low count' genes. DESeq2's IF step tries to maximize the number of DEGs, so this may vary between contrasts.
Insignificant	> 0	Exists	Exists	>= 0.01	These are part of the actual analysis
DEG (Differentially Expressed Gene)	> 0	|log2FC| > 1	Exists	< 0.01	These are the genes that are considered to be of interest.

## Sheet: DEG
Geneid	gene_name	gene_type	baseMean	log2FoldChange	lfcSE	stat	pvalue	padj	classification
ENSG00000011465.12	DCN	protein_coding	65930.8	-4.00337	0.0744539	-40.3387	0	0	DEG
ENSG00000065534.14	MYLK	protein_coding	26233.9	-4.8948	0.0755225	-51.5714	0	0	DEG
ENSG00000075223.9	SEMA3C	protein_coding	23738.7	-4.21887	0.0789834	-40.7538	0	0	DEG
ENSG00000105974.7	CAV1	protein_coding	32851.8	-3.98551	0.078937	-37.8214	0	0	DEG
ENSG00000107796.8	ACTA2	protein_coding	3760.6	-6.01779	0.132909	-37.7535	0	0	DEG
ENSG00000108821.9	COL1A1	protein_coding	23251.8	-5.10396	0.105186	-39.016	0	0	DEG
ENSG00000112902.7	SEMA5A	protein_coding	12260.7	-4.32675	0.0861717	-38.6061	0	0	DEG
ENSG00000113083.8	LOX	protein_coding	28351.7	-4.2753	0.069909	-46.851	0	0	DEG
ENSG00000114251.9	WNT5A	protein_coding	62005	-3.9757	0.0689699	-43.1449	0	0	DEG
ENSG00000115380.14	EFEMP1	protein_coding	16610.6	-4.72832	0.0845402	-44.1012	0	0	DEG
ENSG00000115414.14	FN1	protein_coding	214959	-4.1516	0.0724796	-43.4826	0	0	DEG
ENSG00000115461.4	IGFBP5	protein_coding	47150.2	-6.75646	0.0928885	-61.9717	0	0	DEG
ENSG00000129048.6	ACKR4	protein_coding	5701.64	-6.7877	0.131939	-43.8664	0	0	DEG
ENSG00000133110.10	POSTN	protein_coding	4927.38	-7.78824	0.180775	-37.5507	0	0	DEG
ENSG00000137573.9	SULF1	protein_coding	20489.4	-6.46532	0.0918486	-59.5036	0	0	DEG
ENSG00000137801.9	THBS1	protein_coding	99352.6	-5.81129	0.0809395	-59.443	0	0	DEG
ENSG00000139926.11	FRMD6	protein_coding	37780.9	-4.35879	0.0687638	-48.8454	0	0	DEG
ENSG00000146674.10	IGFBP3	protein_coding	30065.6	-5.15798	0.0788715	-52.7184	0	0	DEG
ENSG00000149591.12	TAGLN	protein_coding	36915.9	-7.49044	0.0887943	-73.0952	0	0	DEG
ENSG00000163359.11	COL6A3	protein_coding	69213.9	-5.17838	0.0893654	-46.7562	0	0	DEG
ENSG00000164692.13	COL1A2	protein_coding	57503.2	-4.34728	0.0844111	-39.6545	0	0	DEG
ENSG00000165092.8	ALDH1A1	protein_coding	39195.3	-5.61854	0.0776187	-59.5029	0	0	DEG
ENSG00000168542.8	COL3A1	protein_coding	71054.3	-5.08313	0.0685342	-59.578	0	0	DEG
ENSG00000180914.6	OXTR	protein_coding	17801.7	-4.5794	0.0791264	-45.2365	0	0	DEG
ENSG00000189184.7	PCDH18	protein_coding	19798.3	-4.79079	0.0735064	-51.5709	0	0	DEG
ENSG00000204262.7	COL5A2	protein_coding	45389.2	-3.83094	0.0679375	-41.6698	0	0	DEG
ENSG00000186340.10	THBS2	protein_coding	22075.6	-4.46257	0.0926866	-37.3578	1.89277e-305	1.26823e-302	DEG
ENSG00000144810.11	COL8A1	protein_coding	10404.3	-4.9192	0.105172	-37.2647	6.1249e-304	3.95734e-301	DEG
ENSG00000101825.7	MXRA5	protein_coding	4661.33	-6.32584	0.144181	-36.9386	1.1091e-298	6.91888e-296	DEG
ENSG00000122786.15	CALD1	protein_coding	29257.7	-3.48758	0.0677292	-36.7283	2.58316e-295	1.55773e-292	DEG
ENSG00000183160.8	TMEM119	protein_coding	10315.4	-4.37083	0.0934379	-36.0757	5.464e-285	3.18869e-282	DEG
ENSG00000171150.7	SOCS5	protein_coding	19310.4	-3.58758	0.0722241	-35.8271	4.18846e-281	2.36792e-278	DEG
ENSG00000163430.5	FSTL1	protein_coding	84502.6	-3.32874	0.0651307	-35.7549	5.55833e-280	3.04714e-277	DEG
ENSG00000103888.11	KIAA1199	protein_coding	9351.6	-4.44592	0.0969642	-35.5381	1.26822e-276	6.74807e-274	DEG
ENSG00000130635.11	COL5A1	protein_coding	29221.8	-3.51978	0.071344	-35.3187	3.03e-273	1.56616e-270	DEG
ENSG00000140416.15	TPM1	protein_coding	43780.5	-3.51412	0.0718131	-35.0093	1.62597e-268	8.17096e-266	DEG
ENSG00000100234.11	TIMP3	protein_coding	81895	-3.66215	0.0765263	-34.7873	3.7789e-265	1.84768e-262	DEG
ENSG00000120708.12	TGFBI	protein_coding	23996.2	-3.35364	0.0678455	-34.6912	1.06955e-263	5.09191e-261	DEG
ENSG00000221963.5	APOL6	protein_coding	6994.11	-4.03454	0.0875999	-34.6409	6.11937e-263	2.8386e-260	DEG
ENSG00000115963.9	RND3	protein_coding	28455.2	-3.34133	0.0676252	-34.6222	1.17296e-262	5.30503e-260	DEG
ENSG00000038427.11	VCAN	protein_coding	4663.34	-4.66786	0.108964	-33.6612	2.14024e-248	9.4437e-246	DEG
ENSG00000206538.3	VGLL3	protein_coding	15358.1	-3.77839	0.082838	-33.5401	1.25704e-246	5.41455e-244	DEG
ENSG00000025039.10	RRAGD	protein_coding	3361.35	8.33806	0.219169	33.4812	9.03804e-246	3.80249e-243	DEG
ENSG00000140937.9	CDH11	protein_coding	21900.8	-3.30992	0.0694295	-33.2701	1.04719e-242	4.3056e-240	DEG
ENSG00000139329.4	LUM	protein_coding	108763	-3.78577	0.0839469	-33.1849	1.7801e-241	7.15639e-239	DEG
ENSG00000112769.14	LAMA4	protein_coding	17309.7	-3.66762	0.0811075	-32.8899	3.06791e-237	1.20655e-234	DEG
ENSG00000107562.12	CXCL12	protein_coding	3790.39	-4.54685	0.109375	-32.4282	1.09841e-230	4.22793e-228	DEG
ENSG00000181019.8	NQO1	protein_coding	19530.5	-3.26473	0.0702221	-32.2509	3.4137e-228	1.28661e-225	DEG
ENSG00000166923.6	GREM1	protein_coding	42955.8	-3.23567	0.0712263	-31.3883	2.92586e-216	1.08024e-213	DEG
ENSG00000272761.1	RP11-572C15.6	lincRNA	2455.96	-6.23339	0.166898	-31.3568	7.84871e-216	2.83982e-213	DEG
ENSG00000091986.11	CCDC80	protein_coding	7414.64	-4.20061	0.103736	-30.8535	5.03205e-209	1.78499e-206	DEG
ENSG00000255248.2	RP11-166D19.1	sense_overlapping	4071.23	-4.35044	0.110038	-30.4479	1.2753e-203	4.43683e-201	DEG
ENSG00000169429.6	IL8	protein_coding	5204.77	5.27537	0.143531	29.7871	5.73603e-195	1.95793e-192	DEG
ENSG00000134986.9	NREP	protein_coding	8644.2	-4.0945	0.1048	-29.5277	1.27061e-191	4.25679e-189	DEG
ENSG00000138685.8	FGF2	protein_coding	19452.8	-3.03625	0.0692952	-29.3852	8.48418e-190	2.79068e-187	DEG
ENSG00000078098.9	FAP	protein_coding	12226.7	-3.83076	0.0967477	-29.2592	3.42582e-188	1.10672e-185	DEG
ENSG00000122642.6	FKBP9	protein_coding	10139.5	-3.21599	0.0772181	-28.6978	4.06515e-181	1.29022e-178	DEG
ENSG00000106819.7	ASPN	protein_coding	2461.56	-7.76042	0.2362	-28.6215	3.62576e-180	1.13092e-177	DEG
UL40	UL40	CMV	100191	15.8258	0.519345	28.5472	3.04729e-179	9.34381e-177	DEG
ENSG00000151012.9	SLC7A11	protein_coding	15941.7	-3.20977	0.0778053	-28.4012	1.95278e-177	5.88795e-175	DEG
ENSG00000166145.10	SPINT1	protein_coding	2135.81	7.12331	0.216244	28.3167	2.15512e-176	6.39152e-174	DEG
US28	US28	CMV	92056.3	15.712	0.521059	28.2348	2.18699e-175	6.38143e-173	DEG
ENSG00000084636.13	COL16A1	protein_coding	11839.8	-3.09664	0.0743502	-28.1996	5.91441e-175	1.69837e-172	DEG
ENSG00000113140.6	SPARC	protein_coding	153542	-3.77735	0.0986787	-28.1454	2.72968e-174	7.71604e-172	DEG
ENSG00000111799.16	COL12A1	protein_coding	63705.6	-3.6369	0.094541	-27.8916	3.37638e-171	9.39725e-169	DEG
ENSG00000164442.8	CITED2	protein_coding	13665.6	-3.20673	0.0792197	-27.8559	9.14445e-171	2.50655e-168	DEG
UL5	UL5	CMV	81164.7	15.5456	0.523367	27.7924	5.35249e-170	1.44525e-167	DEG
US18	US18	CMV	75623.3	15.4537	0.524539	27.5551	3.83933e-167	1.02143e-164	DEG
ENSG00000136542.4	GALNT5	protein_coding	3385.11	-4.06234	0.111605	-27.4392	9.35513e-166	2.45281e-163	DEG
ENSG00000117289.7	TXNIP	protein_coding	12211.3	-3.06143	0.0753137	-27.3712	6.04074e-165	1.56119e-162	DEG
ENSG00000164220.6	F2RL2	protein_coding	2670.26	-5.47085	0.16347	-27.3497	1.08942e-164	2.77587e-162	DEG
ENSG00000163520.9	FBLN2	protein_coding	34200.7	-2.92879	0.0706853	-27.287	6.04673e-164	1.51932e-161	DEG
UL31	UL31	CMV	67926.1	15.3124	0.526515	27.1833	1.02454e-162	2.53903e-160	DEG
ENSG00000166482.7	MFAP4	protein_coding	3727.07	-4.14348	0.116031	-27.0918	1.22861e-161	3.00363e-159	DEG
UL44	UL44	CMV	66024.6	15.2748	0.527064	27.0836	1.53484e-161	3.70225e-159	DEG
UL49	UL49	CMV	65055.2	15.2558	0.5273	27.0354	5.67241e-161	1.35026e-158	DEG
ENSG00000136235.11	GPNMB	protein_coding	12830.3	-3.21831	0.0828888	-26.7625	8.84332e-158	2.07772e-155	DEG
ENSG00000008735.10	MAPK8IP2	protein_coding	1778.86	5.66006	0.174806	26.6585	1.4273e-156	3.31043e-154	DEG
UL4	UL4	CMV	58264.5	15.1058	0.529842	26.6226	3.71917e-156	8.51689e-154	DEG
ENSG00000154096.9	THY1	protein_coding	40370.6	-2.94431	0.0739067	-26.3077	1.56519e-152	3.53949e-150	DEG
ENSG00000177363.4	LRRN4CL	protein_coding	1858.13	-5.11919	0.157532	-26.1484	1.02845e-150	2.29699e-148	DEG
ENSG00000101187.11	SLCO4A1	protein_coding	1910.59	5.49891	0.172066	26.1464	1.08383e-150	2.39118e-148	DEG
ENSG00000140285.5	FGF7	protein_coding	1754.15	-4.92113	0.150456	-26.0616	9.93067e-150	2.16453e-147	DEG
ENSG00000183087.10	GAS6	protein_coding	26435.3	-3.13757	0.0822559	-25.9869	6.97259e-149	1.50168e-146	DEG
ENSG00000169744.8	LDB2	protein_coding	1793.78	-4.85881	0.149412	-25.8265	4.46524e-147	9.50361e-145	DEG
UL98	UL98	CMV	44871.8	14.7661	0.534495	25.7553	2.80877e-146	5.90854e-144	DEG
ENSG00000022267.12	FHL1	protein_coding	18212.8	-3.16087	0.084395	-25.6042	1.37038e-144	2.84961e-142	DEG
ENSG00000145147.15	SLIT2	protein_coding	6249.91	-3.54969	0.0998373	-25.5384	7.38103e-144	1.51739e-141	DEG
ENSG00000253368.3	TRNP1	protein_coding	8165.2	-3.12774	0.0837718	-25.3992	2.5715e-142	5.22709e-140	DEG
ENSG00000119681.7	LTBP2	protein_coding	6410.04	-3.74569	0.108126	-25.3934	2.98272e-142	5.99559e-140	DEG
UL43	UL43	CMV	40231.2	14.6238	0.53653	25.3924	3.05888e-142	6.08113e-140	DEG
ENSG00000026025.9	VIM	protein_coding	91914	-2.59041	0.0627208	-25.357	7.52254e-142	1.47924e-139	DEG
UL25	UL25	CMV	38957	14.5813	0.537192	25.282	5.03807e-141	9.8004e-139	DEG
UL50	UL50	CMV	38560.2	14.568	0.537377	25.2486	1.17326e-140	2.25803e-138	DEG
ENSG00000020181.13	GPR124	protein_coding	8598.74	-3.1466	0.0850453	-25.2406	1.43546e-140	2.73358e-138	DEG
ENSG00000127241.12	MASP1	protein_coding	3546.85	-4.36372	0.134723	-24.9676	1.37513e-137	2.59141e-135	DEG
UL97	UL97	CMV	35033	14.44	0.5395	24.9119	5.52407e-137	1.03027e-134	DEG
ENSG00000135919.8	SERPINE2	protein_coding	15497.5	-2.92402	0.077251	-24.9061	6.39257e-137	1.18008e-134	DEG
ENSG00000178718.5	RPP25	protein_coding	2096.73	4.42243	0.138345	24.7383	4.141e-135	7.56715e-133	DEG
ENSG00000136960.8	ENPP2	protein_coding	9185.8	-2.93784	0.0784997	-24.686	1.51336e-134	2.73782e-132	DEG
ENSG00000122420.5	PTGFR	protein_coding	2722.62	-3.96072	0.120067	-24.6588	2.96208e-134	5.30564e-132	DEG
ENSG00000117152.9	RGS4	protein_coding	5740.53	-4.19749	0.129758	-24.6419	4.49917e-134	7.97985e-132	DEG
ENSG00000165424.6	ZCCHC24	protein_coding	9929.65	-2.89958	0.0771359	-24.6265	6.57916e-134	1.15557e-131	DEG
UL112	UL112	CMV	31114.8	14.2866	0.541685	24.5282	7.38674e-133	1.28494e-130	DEG
ENSG00000041982.10	TNC	protein_coding	13898.6	-3.64518	0.108063	-24.4781	2.53022e-132	4.35944e-130	DEG
ENSG00000167460.10	TPM4	protein_coding	20095.7	-2.67177	0.068365	-24.4535	4.61674e-132	7.87939e-130	DEG
ENSG00000175899.10	A2M	protein_coding	10266	-2.98602	0.0814543	-24.3821	2.65003e-131	4.48053e-129	DEG
UL102	UL102	CMV	29324.1	14.2066	0.543116	24.3164	1.31582e-130	2.20412e-128	DEG
ENSG00000149451.13	ADAM33	protein_coding	6650.36	-3.36855	0.097685	-24.2468	7.15249e-130	1.18712e-127	DEG
ENSG00000110660.10	SLC35F2	protein_coding	1662.61	4.55594	0.146705	24.2388	8.6837e-130	1.42815e-127	DEG
ENSG00000154639.14	CXADR	protein_coding	1336.57	6.2051	0.214897	24.2214	1.32373e-129	2.15745e-127	DEG
ENSG00000138646.4	HERC5	protein_coding	1809.26	4.66617	0.152271	24.0767	4.38933e-128	7.08995e-126	DEG
ENSG00000185630.14	PBX1	protein_coding	5011.49	-3.26725	0.0943058	-24.0415	1.02389e-127	1.63923e-125	DEG
ENSG00000164181.9	ELOVL7	protein_coding	1625.43	7.55781	0.272918	24.0285	1.40023e-127	2.22207e-125	DEG
ENSG00000164932.8	CTHRC1	protein_coding	1848.18	-4.33047	0.138848	-23.9865	3.85119e-127	6.05843e-125	DEG
ENSG00000198682.8	PAPSS2	protein_coding	13047.2	-2.87671	0.0783603	-23.9497	9.29961e-127	1.45034e-124	DEG
ENSG00000151414.10	NEK7	protein_coding	23035	-2.72717	0.072312	-23.885	4.38134e-126	6.77461e-124	DEG
ENSG00000128656.9	CHN1	protein_coding	7188.75	-2.9422	0.0817088	-23.7698	6.85722e-125	1.0513e-122	DEG
ENSG00000196924.10	FLNA	protein_coding	41655.2	-3.09197	0.0881413	-23.7343	1.5969e-124	2.42769e-122	DEG
US12	US12	CMV	24429.5	13.9689	0.546748	23.7201	2.2381e-124	3.37412e-122	DEG
ENSG00000125657.3	TNFSF9	protein_coding	1325.86	6.04886	0.212883	23.7166	2.43273e-124	3.63723e-122	DEG
ENSG00000164920.5	OSR2	protein_coding	2026.82	-4.56503	0.150334	-23.7141	2.57814e-124	3.82305e-122	DEG
US20	US20	CMV	24331.1	13.9646	0.546731	23.713	2.64659e-124	3.89264e-122	DEG
UL48	UL48	CMV	24131.8	13.9537	0.546923	23.6847	5.18856e-124	7.56986e-122	DEG
ENSG00000166741.3	NNMT	protein_coding	14385.7	-3.15743	0.0911072	-23.6802	5.77241e-124	8.35429e-122	DEG
UL105	UL105	CMV	24068.2	13.9484	0.547161	23.6647	8.33258e-124	1.19639e-121	DEG
ENSG00000072952.14	MRVI1	protein_coding	1646.49	-4.81483	0.161559	-23.6126	2.86187e-123	4.07671e-121	DEG
ENSG00000162733.12	DDR2	protein_coding	19362.3	-2.70113	0.0721064	-23.592	4.66129e-123	6.58808e-121	DEG
ENSG00000079257.3	LXN	protein_coding	1656.65	-4.44092	0.146097	-23.5523	1.18769e-122	1.66562e-120	DEG
ENSG00000171451.13	DSEL	protein_coding	12415	-3.0465	0.0869725	-23.5304	1.99253e-122	2.77283e-120	DEG
UL145	UL145	CMV	22721.9	13.8751	0.548168	23.4875	5.4789e-122	7.56632e-120	DEG
UL38	UL38	CMV	22758.5	13.8755	0.548304	23.4824	6.169e-122	8.4548e-120	DEG
ENSG00000164125.11	FAM198B	protein_coding	1329.14	-5.35095	0.185739	-23.425	2.37659e-121	3.2327e-119	DEG
ENSG00000136048.9	DRAM1	protein_coding	14781.5	-3.23654	0.0954819	-23.4237	2.45218e-121	3.31062e-119	DEG
RL13/TRL14	RL13/TRL14	CMV	22731.1	13.862	0.549525	23.4056	3.74677e-121	5.02096e-119	DEG
ENSG00000204291.6	COL15A1	protein_coding	4922.21	-3.25253	0.0963622	-23.3757	7.55569e-121	1.00507e-118	DEG
UL55	UL55	CMV	22829	13.8599	0.550204	23.373	8.05349e-121	1.06347e-118	DEG
ENSG00000196569.7	LAMA2	protein_coding	4318.11	-3.4418	0.104703	-23.3212	2.70174e-120	3.54183e-118	DEG
US27	US27	CMV	21713.2	13.8105	0.549649	23.3067	3.79274e-120	4.93629e-118	DEG
UL132	UL132	CMV	21383.4	13.7924	0.54978	23.2682	9.29892e-120	1.20162e-117	DEG
ENSG00000101335.5	MYL9	protein_coding	5987.97	-3.32003	0.0999051	-23.2224	2.70669e-119	3.47281e-117	DEG
UL80	UL80	CMV	20853.9	13.7596	0.550317	23.1859	6.31605e-119	8.04673e-117	DEG
ENSG00000082482.9	KCNK2	protein_coding	2361.8	-3.8781	0.12421	-23.1713	8.86573e-119	1.12161e-116	DEG
UL84	UL84	CMV	20705.3	13.7485	0.550641	23.1521	1.3833e-118	1.73787e-116	DEG
UL27	UL27	CMV	20506.3	13.7388	0.550554	23.1381	1.91395e-118	2.38795e-116	DEG
ENSG00000165949.8	IFI27	protein_coding	1254.97	5.34545	0.189477	22.934	2.12989e-116	2.63917e-114	DEG
UL136	UL136	CMV	17970.2	13.5681	0.553213	22.7183	2.95094e-114	3.63167e-112	DEG
ENSG00000172403.6	SYNPO2	protein_coding	1428.8	-4.63155	0.160004	-22.6966	4.83749e-114	5.91317e-112	DEG
ENSG00000116016.9	EPAS1	protein_coding	9051.8	-2.7798	0.0785583	-22.6558	1.22296e-113	1.48487e-111	DEG
ENSG00000198363.11	ASPH	protein_coding	25066.5	-2.56592	0.0691664	-22.6399	1.75532e-113	2.11704e-111	DEG
UL100	UL100	CMV	17466.5	13.5314	0.553783	22.6287	2.26094e-113	2.70878e-111	DEG
ENSG00000138131.3	LOXL4	protein_coding	12896.6	-2.80455	0.0802024	-22.4999	4.15877e-112	4.94976e-110	DEG
UL135	UL135	CMV	16276.6	13.4393	0.555324	22.4	3.93422e-111	4.65189e-109	DEG
ENSG00000113721.9	PDGFRB	protein_coding	23187.8	-3.31585	0.103419	-22.3928	4.62598e-111	5.43433e-109	DEG
US19	US19	CMV	15956.4	13.4088	0.556223	22.309	3.0209e-110	3.52588e-108	DEG
ENSG00000179981.9	TSHZ1	protein_coding	2817.11	-3.49845	0.112261	-22.2557	9.92335e-110	1.15079e-107	DEG
UL54	UL54	CMV	15848.5	13.3942	0.556957	22.2534	1.04622e-109	1.20555e-107	DEG
UL95	UL95	CMV	15378.1	13.3652	0.556571	22.2168	2.36553e-109	2.70853e-107	DEG
US22	US22	CMV	15241.5	13.3535	0.556771	22.1878	4.50817e-109	5.12939e-107	DEG
UL13	UL13	CMV	15228.8	13.3521	0.556828	22.1829	5.02197e-109	5.67828e-107	DEG
ENSG00000233276.2	GPX1	protein_coding	9052.03	-2.96737	0.0888451	-22.1438	1.19718e-108	1.34523e-106	DEG
UL93	UL93	CMV	14810.1	13.316	0.55741	22.0951	3.52445e-108	3.93586e-106	DEG
ENSG00000143387.8	CTSK	protein_coding	48056.3	-2.52861	0.0692092	-22.0868	4.23527e-108	4.70063e-106	DEG
UL78	UL78	CMV	14951.7	13.3213	0.557926	22.0841	4.4913e-108	4.9544e-106	DEG
ENSG00000163431.11	LMOD1	protein_coding	1213.28	-5.06203	0.184685	-21.9944	3.25865e-107	3.57286e-105	DEG
ENSG00000050405.9	LIMA1	protein_coding	9531.54	-2.69498	0.0770872	-21.9878	3.7657e-107	4.10393e-105	DEG
ENSG00000180447.5	GAS1	protein_coding	3873.79	-3.22362	0.10115	-21.9834	4.14795e-107	4.49345e-105	DEG
UL32	UL32	CMV	14321.7	13.2709	0.558297	21.9792	4.55803e-107	4.90829e-105	DEG
UL123	UL123	CMV	13632	13.2081	0.559242	21.8297	1.21277e-105	1.29824e-103	DEG
US30	US30	CMV	12997.6	13.1459	0.56032	21.6767	3.40569e-104	3.62426e-102	DEG
ENSG00000163661.3	PTX3	protein_coding	2145.32	-3.64099	0.121924	-21.661	4.79188e-104	5.06959e-102	DEG
RL12	RL12	CMV	12593.4	13.093	0.562233	21.5089	1.28408e-102	1.3506e-100	DEG
ENSG00000170345.5	FOS	protein_coding	2327.8	-4.3323	0.155098	-21.4852	2.14298e-102	2.24097e-100	DEG
ENSG00000166920.6	C15orf48	protein_coding	1237.36	7.17992	0.287951	21.4617	3.55076e-102	3.69176e-100	DEG
UL94	UL94	CMV	11986.4	13.0396	0.56223	21.4141	9.87591e-102	1.02094e-99	DEG
UL47	UL47	CMV	11920.7	13.0324	0.562362	21.3962	1.44918e-101	1.48961e-99	DEG
UL36	UL36	CMV	11809.3	13.0207	0.56252	21.3694	2.57326e-101	2.63011e-99	DEG
US23	US23	CMV	11692	13.0081	0.562712	21.3397	4.86465e-101	4.94418e-99	DEG
ENSG00000142156.10	COL6A1	protein_coding	39180	-2.72405	0.0808801	-21.3162	8.03742e-101	8.12318e-99	DEG
UL71	UL71	CMV	11547.9	12.9911	0.563082	21.2954	1.25142e-100	1.25774e-98	DEG
ENSG00000235162.4	C12orf75	protein_coding	25211.5	-2.67268	0.0786614	-21.2643	2.43051e-100	2.4293e-98	DEG
US9	US9	CMV	11429.2	12.9761	0.56348	21.2537	3.04447e-100	3.02624e-98	DEG
US24	US24	CMV	11173.9	12.9491	0.563746	21.1958	1.04299e-99	1.03108e-97	DEG
UL144	UL144	CMV	11123.4	12.9432	0.563848	21.1816	1.41162e-99	1.38791e-97	DEG
UL148	UL148	CMV	11123.5	12.9423	0.563942	21.1764	1.57478e-99	1.53997e-97	DEG
UL80.5	UL80.5	CMV	11129.4	12.941	0.564137	21.1669	1.93024e-99	1.87741e-97	DEG
ENSG00000141753.5	IGFBP4	protein_coding	15098.8	-2.72438	0.0815192	-21.153	2.587e-99	2.50275e-97	DEG
ENSG00000166147.9	FBN1	protein_coding	36012.1	-3.34082	0.110754	-21.1353	3.76706e-99	3.62499e-97	DEG
ENSG00000050165.13	DKK3	protein_coding	48902.9	-2.38437	0.0658461	-21.0244	3.92518e-98	3.75716e-96	DEG
ENSG00000154188.5	ANGPT1	protein_coding	1302.86	-4.84884	0.183132	-21.0168	4.60777e-98	4.38733e-96	DEG
ENSG00000013016.10	EHD3	protein_coding	5140.93	-3.04616	0.0975687	-20.9715	1.19525e-97	1.13211e-95	DEG
ENSG00000250722.1	SEPP1	protein_coding	1099.01	-4.81247	0.182782	-20.8581	1.2881e-96	1.21369e-94	DEG
ENSG00000138356.9	AOX1	protein_coding	2238.14	-3.81772	0.135176	-20.8448	1.69959e-96	1.59312e-94	DEG
UL26	UL26	CMV	9963.47	12.7952	0.566881	20.8072	3.7275e-96	3.47599e-94	DEG
UL56	UL56	CMV	9940.61	12.7809	0.568108	20.7371	1.60399e-95	1.48809e-93	DEG
ENSG00000129009.8	ISLR	protein_coding	6290.05	-2.87487	0.0904999	-20.7168	2.44207e-95	2.25405e-93	DEG
US29	US29	CMV	9544.71	12.7434	0.567465	20.6945	3.88429e-95	3.56704e-93	DEG
ENSG00000060718.14	COL11A1	protein_coding	1773.86	-3.82384	0.136638	-20.6666	6.92401e-95	6.32638e-93	DEG
ENSG00000112984.7	KIF20A	protein_coding	4741.48	-3.02943	0.0982901	-20.6473	1.0317e-94	9.37917e-93	DEG
UL104	UL104	CMV	9255.98	12.7041	0.568123	20.6013	2.67431e-94	2.41905e-92	DEG
UL138	UL138	CMV	8791.45	12.6372	0.56933	20.4402	7.34966e-93	6.61506e-91	DEG
UL35	UL35	CMV	8733.39	12.6266	0.569697	20.4083	1.41016e-92	1.26293e-90	DEG
ENSG00000182179.6	UBA7	protein_coding	1896.19	-4.12945	0.153492	-20.3884	2.12048e-92	1.88974e-90	DEG
US32	US32	CMV	8617.09	12.6105	0.569871	20.374	2.84645e-92	2.52427e-90	DEG
UL28	UL28	CMV	8594.2	12.606	0.570044	20.3599	3.7958e-92	3.34974e-90	DEG
UL86	UL86	CMV	8575.74	12.5994	0.570493	20.3323	6.66263e-92	5.85115e-90	DEG
ENSG00000161570.4	CCL5	protein_coding	1514.58	8.2674	0.357759	20.3137	9.73821e-92	8.51082e-90	DEG
ENSG00000114698.10	PLSCR4	protein_coding	4223.03	-3.51199	0.124056	-20.2488	3.63888e-91	3.16495e-89	DEG
UL23	UL23	CMV	8338.34	12.562	0.571262	20.2393	4.41243e-91	3.81939e-89	DEG
ENSG00000121039.5	RDH10	protein_coding	11363.4	-2.52096	0.0757259	-20.0851	9.95627e-90	8.57709e-88	DEG
ENSG00000198467.9	TPM2	protein_coding	8544.54	-3.17399	0.108252	-20.0826	1.0484e-89	8.98893e-88	DEG
ENSG00000122707.7	RECK	protein_coding	7084.82	-2.88765	0.0942801	-20.0217	3.56237e-89	3.03994e-87	DEG
ENSG00000106366.7	SERPINE1	protein_coding	5868.77	-3.09827	0.104847	-20.0127	4.27121e-89	3.62772e-87	DEG
ENSG00000163376.7	KBTBD8	protein_coding	1453.7	4.07888	0.153874	20.0091	4.58697e-89	3.8777e-87	DEG
ENSG00000154734.10	ADAMTS1	protein_coding	3346.58	-3.29596	0.11478	-20.0032	5.16426e-89	4.34543e-87	DEG
ENSG00000165124.13	SVEP1	protein_coding	3780.46	-2.97873	0.0989707	-19.9931	6.32452e-89	5.29708e-87	DEG
ENSG00000187498.10	COL4A1	protein_coding	25452.3	-2.35662	0.0680039	-19.9492	1.52262e-88	1.26357e-86	DEG
UL20	UL20	CMV	7511.06	12.4328	0.57309	19.9493	1.51933e-88	1.26357e-86	DEG
ENSG00000137809.12	ITGA11	protein_coding	1776.33	-4.20982	0.161033	-19.9327	2.11973e-88	1.75106e-86	DEG
ENSG00000144485.6	HES6	protein_coding	1482.89	4.12197	0.156638	19.9312	2.18464e-88	1.79647e-86	DEG
ENSG00000153993.9	SEMA3D	protein_coding	3257.03	-3.02	0.101724	-19.8576	9.46718e-88	7.7498e-86	DEG
ENSG00000211448.7	DIO2	protein_coding	680.071	-6.01894	0.252838	-19.8504	1.0933e-87	8.90944e-86	DEG
ENSG00000155130.5	MARCKS	protein_coding	36944.5	-2.43415	0.0723289	-19.8283	1.69843e-87	1.37786e-85	DEG
UL89	UL89	CMV	7201.25	12.3777	0.57415	19.8166	2.14175e-87	1.72975e-85	DEG
UL114	UL114	CMV	7218.58	12.3794	0.574243	19.8163	2.15371e-87	1.73168e-85	DEG
UL46	UL46	CMV	7157.84	12.3661	0.574694	19.7776	4.63838e-87	3.71296e-85	DEG
ENSG00000135454.9	B4GALNT1	protein_coding	1077.41	4.49485	0.177377	19.703	2.0332e-86	1.62038e-84	DEG
US34	US34	CMV	6726.35	12.2886	0.575872	19.6027	1.46743e-85	1.16436e-83	DEG
US14	US14	CMV	6647.94	12.2742	0.576081	19.5705	2.76224e-85	2.18217e-83	DEG
ENSG00000256043.2	CTSO	protein_coding	1737.81	-3.60591	0.133465	-19.5251	6.71683e-85	5.28323e-83	DEG
ENSG00000152661.7	GJA1	protein_coding	6661.07	-3.11792	0.108563	-19.5087	9.26918e-85	7.25925e-83	DEG
UL119	UL119	CMV	6492.02	12.2422	0.576793	19.4908	1.31341e-84	1.02417e-82	DEG
ENSG00000163629.8	PTPN13	protein_coding	12750.3	-2.60292	0.0822823	-19.4808	1.5978e-84	1.24059e-82	DEG
ENSG00000124212.5	PTGIS	protein_coding	1235.86	-4.78584	0.194457	-19.4688	2.02034e-84	1.56196e-82	DEG
ENSG00000206337.6	HCP5	sense_overlapping	1770.02	3.63514	0.135492	19.4487	2.988e-84	2.30025e-82	DEG
ENSG00000166900.10	STX3	protein_coding	5243	2.78374	0.0917742	19.4362	3.81201e-84	2.92217e-82	DEG
ENSG00000263426.1	RN7SL471P	misc_RNA	17354.4	2.80957	0.0931703	19.4222	5.01432e-84	3.8276e-82	DEG
ENSG00000119938.8	PPP1R3C	protein_coding	3429.54	-3.20071	0.11348	-19.393	8.84676e-84	6.72465e-82	DEG
ENSG00000134013.11	LOXL2	protein_coding	9725.36	-2.73229	0.0894644	-19.3629	1.58764e-83	1.20176e-81	DEG
ENSG00000129038.11	LOXL1	protein_coding	4246.68	-3.27116	0.117691	-19.2976	5.6296e-83	4.24355e-81	DEG
US8	US8	CMV	6070.45	12.156	0.578359	19.289	6.63899e-83	4.98365e-81	DEG
ENSG00000213190.2	MLLT11	protein_coding	3116.71	3.15505	0.111953	19.2497	1.41982e-82	1.06141e-80	DEG
ENSG00000152049.5	KCNE4	protein_coding	1633.38	-3.59106	0.134611	-19.2485	1.45254e-82	1.0814e-80	DEG
UL29	UL29	CMV	6020.73	12.1423	0.578883	19.2479	1.46883e-82	1.08904e-80	DEG
UL6	UL6	CMV	5970.18	12.1348	0.578731	19.2401	1.7094e-82	1.26224e-80	DEG
US31	US31	CMV	5928.37	12.1258	0.5789	19.2188	2.57708e-82	1.8952e-80	DEG
US15	US15	CMV	5780.09	12.0902	0.579829	19.1266	1.51704e-81	1.11113e-79	DEG
ENSG00000139289.9	PHLDA1	protein_coding	4970.21	-2.71387	0.0898768	-19.069	4.56588e-81	3.3307e-79	DEG
ENSG00000004478.5	FKBP4	protein_coding	9964.67	2.67033	0.0876054	19.0666	4.78803e-81	3.47872e-79	DEG
ENSG00000183671.8	GPR1	protein_coding	923.032	-7.85448	0.360652	-19.0058	1.52748e-80	1.10535e-78	DEG
ENSG00000198796.6	ALPK2	protein_coding	2288.23	-3.80342	0.147712	-18.9789	2.54803e-80	1.83651e-78	DEG
UL115	UL115	CMV	5448.5	12.0161	0.581048	18.959	3.72347e-80	2.67307e-78	DEG
UL42	UL42	CMV	5342.37	11.9904	0.581563	18.8981	1.18238e-79	8.45473e-78	DEG
ENSG00000162591.11	MEGF6	protein_coding	7526.47	-3.36612	0.125216	-18.8964	1.22219e-79	8.70501e-78	DEG
UL87	UL87	CMV	5340.17	11.9889	0.58168	18.8917	1.33564e-79	9.4757e-78	DEG
UL150	UL150	CMV	5265.08	11.9713	0.581964	18.8521	2.82218e-79	1.99438e-77	DEG
UL117	UL117	CMV	5244.62	11.9658	0.582107	18.8381	3.67819e-79	2.58919e-77	DEG
ENSG00000101210.6	EEF1A2	protein_coding	808.26	5.79052	0.254577	18.8176	5.41748e-79	3.79875e-77	DEG
US16	US16	CMV	5086.67	11.9261	0.582891	18.7448	2.13644e-78	1.49229e-76	DEG
UL14	UL14	CMV	5067.05	11.9214	0.582963	18.7342	2.60328e-78	1.81138e-76	DEG
UL33	UL33	CMV	4905.88	11.8803	0.58371	18.6398	1.52673e-77	1.05824e-75	DEG
ENSG00000087245.8	MMP2	protein_coding	46067	-2.27603	0.0685805	-18.6063	2.85704e-77	1.97277e-75	DEG
ENSG00000155816.15	FMN2	protein_coding	1838.7	-3.56728	0.138466	-18.5409	9.66478e-77	6.64812e-75	DEG
UL52	UL52	CMV	4732.18	11.8336	0.584637	18.5305	1.173e-76	8.03817e-75	DEG
US26	US26	CMV	4730.35	11.8331	0.584647	18.5292	1.19961e-76	8.18946e-75	DEG
UL21A	UL21A	CMV	4718.82	11.8292	0.584782	18.5184	1.46671e-76	9.97526e-75	DEG
ENSG00000162496.4	DHRS3	protein_coding	5203.2	-2.92756	0.104259	-18.4881	2.5723e-76	1.7429e-74	DEG
UL99	UL99	CMV	4633.5	11.8056	0.585252	18.4632	4.08529e-76	2.75773e-74	DEG
ENSG00000180336.13	C17orf104	protein_coding	754.081	6.59707	0.303499	18.4418	6.06728e-76	4.08042e-74	DEG
UL24	UL24	CMV	4590.78	11.7913	0.585738	18.4235	8.518e-76	5.70738e-74	DEG
ENSG00000100167.15	SEPT3	protein_coding	775.224	4.78045	0.205493	18.3969	1.3899e-75	9.27846e-74	DEG
ENSG00000167601.7	AXL	protein_coding	21629.6	-2.36837	0.0743887	-18.3948	1.44501e-75	9.61089e-74	DEG
ENSG00000106236.3	NPTX2	protein_coding	794.994	6.79102	0.314941	18.3876	1.65007e-75	1.09346e-73	DEG
UL133	UL133	CMV	4495.31	11.7671	0.58596	18.3752	2.07427e-75	1.36955e-73	DEG
ENSG00000135480.10	KRT7	protein_coding	1722.66	-3.50116	0.136234	-18.3593	2.78074e-75	1.82932e-73	DEG
ENSG00000099250.13	NRP1	protein_coding	8398.95	-2.43615	0.078273	-18.3479	3.43092e-75	2.24887e-73	DEG
ENSG00000142089.11	IFITM3	protein_coding	2698.06	-3.05432	0.112059	-18.3324	4.56193e-75	2.97942e-73	DEG
UL57	UL57	CMV	4456.61	11.7369	0.588234	18.2527	1.96942e-74	1.28161e-72	DEG
ENSG00000134668.8	SPOCD1	protein_coding	1613.36	-3.39893	0.131925	-18.184	6.90824e-74	4.47946e-72	DEG
ENSG00000170624.9	SGCD	protein_coding	3651.95	-2.80705	0.0995778	-18.1471	1.35273e-73	8.74006e-72	DEG
ENSG00000246430.2	LINC00968	lincRNA	772.468	-6.84124	0.322479	-18.1135	2.49283e-73	1.6049e-71	DEG
ENSG00000135862.5	LAMC1	protein_coding	21021.9	-2.47634	0.0815369	-18.1064	2.83807e-73	1.82069e-71	DEG
ENSG00000140092.10	FBLN5	protein_coding	1429.87	-3.53648	0.140097	-18.1051	2.90358e-73	1.85614e-71	DEG
ENSG00000138758.7	SEPT11	protein_coding	34079	-2.36998	0.0756868	-18.1006	3.15183e-73	2.00774e-71	DEG
UL34	UL34	CMV	4097.19	11.6441	0.588707	18.0805	4.53875e-73	2.88107e-71	DEG
UL140	UL140	CMV	4047.79	11.6289	0.58898	18.0463	8.43472e-73	5.3354e-71	DEG
ENSG00000145431.6	PDGFC	protein_coding	2975.13	-2.92514	0.106817	-18.0229	1.28872e-72	8.12342e-71	DEG
ENSG00000071242.7	RPS6KA2	protein_coding	2867.83	-3.05567	0.114313	-17.9829	2.65433e-72	1.66734e-70	DEG
ENSG00000204387.8	C6orf48	protein_coding	6044.77	-2.66678	0.0930382	-17.915	9.01088e-72	5.64068e-70	DEG
UL22A	UL22A	CMV	3903.59	11.575	0.590684	17.903	1.11711e-71	6.96882e-70	DEG
vMIA	vMIA	CMV	3819.93	11.5557	0.590327	17.8811	1.65573e-71	1.02934e-69	DEG
ENSG00000204941.9	PSG5	protein_coding	3410.3	-2.90216	0.106608	-17.8426	3.30173e-71	2.0456e-69	DEG
ENSG00000058668.10	ATP2B4	protein_coding	25648.3	-2.26883	0.0711366	-17.8365	3.68208e-71	2.27347e-69	DEG
ENSG00000099377.9	HSD3B7	protein_coding	1880.49	-3.26661	0.127587	-17.7652	1.31554e-70	8.09504e-69	DEG
ENSG00000103196.7	CRISPLD2	protein_coding	3016.96	-3.02952	0.114324	-17.7524	1.65026e-70	1.01203e-68	DEG
ENSG00000108342.8	CSF3	protein_coding	879.191	6.08945	0.286709	17.7513	1.68428e-70	1.0294e-68	DEG
UL75	UL75	CMV	3651.2	11.4971	0.591555	17.7448	1.88928e-70	1.15081e-68	DEG
ENSG00000060982.10	BCAT1	protein_coding	18036.7	-2.38431	0.0784733	-17.6405	1.20372e-69	7.30754e-68	DEG
ENSG00000049319.2	SRD5A2	processed_transcript	598.118	-6.67702	0.322932	-17.5796	3.52904e-69	2.13525e-67	DEG
UL82	UL82	CMV	3461.51	11.4261	0.593199	17.5761	3.75439e-69	2.26402e-67	DEG
ENSG00000165072.9	MAMDC2	protein_coding	1588.84	-3.48229	0.141736	-17.5135	1.13035e-68	6.79376e-67	DEG
ENSG00000130707.13	ASS1	protein_coding	13615.9	-2.4515	0.0832031	-17.4452	3.743e-68	2.24221e-66	DEG
ENSG00000111913.11	FAM65B	protein_coding	2133.95	-3.30798	0.132389	-17.4334	4.60623e-68	2.75021e-66	DEG
ENSG00000243137.3	PSG4	protein_coding	2270.16	-3.04159	0.117324	-17.4013	8.05913e-68	4.79598e-66	DEG
ENSG00000159216.14	RUNX1	protein_coding	1925.41	-3.35896	0.135966	-17.3496	1.98463e-67	1.17718e-65	DEG
UL83	UL83	CMV	3169.98	11.3152	0.595296	17.3278	2.90095e-67	1.71507e-65	DEG
ENSG00000182272.7	B4GALNT4	protein_coding	1161.11	3.82108	0.163102	17.2964	5.00413e-67	2.94885e-65	DEG
ENSG00000164342.8	TLR3	protein_coding	978.866	-4.70372	0.214248	-17.287	5.88994e-67	3.45958e-65	DEG
ENSG00000108950.7	FAM20A	protein_coding	830.633	-5.25769	0.246581	-17.2669	8.34855e-67	4.88782e-65	DEG
ENSG00000197457.5	STMN3	protein_coding	1045.94	-4.27033	0.189741	-17.2357	1.43208e-66	8.35736e-65	DEG
ENSG00000198780.7	FAM169A	protein_coding	2210.73	3.15497	0.125316	17.1964	2.82722e-66	1.6446e-64	DEG
ENSG00000116774.7	OLFML3	protein_coding	1074.07	-3.88079	0.167728	-17.1754	4.05658e-66	2.35217e-64	DEG
ENSG00000019549.4	SNAI2	protein_coding	1388.46	-3.52963	0.147825	-17.1124	1.19963e-65	6.93372e-64	DEG
ENSG00000197646.6	PDCD1LG2	protein_coding	1482.72	-3.60824	0.152467	-17.1069	1.31864e-65	7.59728e-64	DEG
UL77	UL77	CMV	2969.05	11.2233	0.59789	17.099	1.50866e-65	8.6645e-64	DEG
UL19	UL19	CMV	2933.26	11.2149	0.597439	17.0978	1.54217e-65	8.82894e-64	DEG
ENSG00000117600.8	LPPR4	protein_coding	2658.06	-2.82608	0.106855	-17.0893	1.78363e-65	1.01791e-63	DEG
ENSG00000168427.7	KLHL30	protein_coding	746.054	5.35472	0.256736	16.9619	1.57265e-64	8.94682e-63	DEG
ENSG00000158769.13	F11R	protein_coding	652.085	5.31582	0.254819	16.9368	2.40805e-64	1.36564e-62	DEG
ENSG00000113369.4	ARRDC3	protein_coding	7449.94	-2.42097	0.084036	-16.9091	3.85435e-64	2.17903e-62	DEG
ENSG00000067798.9	NAV3	protein_coding	1707.5	-3.19099	0.12969	-16.894	4.98122e-64	2.80733e-62	DEG
UL103	UL103	CMV	2654.56	11.0849	0.600343	16.7985	2.50183e-63	1.40561e-61	DEG
ENSG00000111674.4	ENO2	protein_coding	1044.76	3.92541	0.174595	16.7554	5.16877e-63	2.89499e-61	DEG
UL51	UL51	CMV	2542.77	11.0288	0.60162	16.6696	2.18011e-62	1.2173e-60	DEG
ENSG00000196562.10	SULF2	protein_coding	1717.12	-3.23382	0.134426	-16.6175	5.20659e-62	2.89823e-60	DEG
ENSG00000169432.10	SCN9A	protein_coding	5580.28	-2.46649	0.0882625	-16.6151	5.41552e-62	3.00528e-60	DEG
ENSG00000125965.4	GDF5	protein_coding	664.653	-5.11043	0.247572	-16.6029	6.63594e-62	3.67128e-60	DEG
ENSG00000163071.6	SPATA18	protein_coding	2311.49	-3.81876	0.170243	-16.5573	1.41879e-61	7.82542e-60	DEG
ENSG00000177410.8	ZFAS1	antisense	5078.16	-2.47244	0.0889519	-16.5532	1.5174e-61	8.34387e-60	DEG
ENSG00000055732.8	MCOLN3	protein_coding	727.548	4.66728	0.22278	16.4615	6.9389e-61	3.80399e-59	DEG
ENSG00000140450.7	ARRDC4	protein_coding	6954.91	-2.44237	0.0876809	-16.4502	8.35597e-61	4.567e-59	DEG
ENSG00000261040.2	CTD-2319I12.1	processed_transcript	769.688	-4.45726	0.210369	-16.4342	1.08782e-60	5.92766e-59	DEG
ENSG00000147027.3	TMEM47	protein_coding	9623.2	-2.26872	0.0772162	-16.4307	1.15343e-60	6.2663e-59	DEG
UL96	UL96	CMV	2296.7	10.8982	0.604438	16.3759	2.84178e-60	1.53924e-58	DEG
ENSG00000135272.5	MDFIC	protein_coding	7859.54	-2.34557	0.0823823	-16.3332	5.72762e-60	3.09308e-58	DEG
ENSG00000163565.14	IFI16	protein_coding	3102.88	-2.92117	0.11765	-16.3296	6.07478e-60	3.2708e-58	DEG
ENSG00000013297.6	CLDN11	protein_coding	1088.61	-3.79906	0.171509	-16.3202	7.09053e-60	3.80637e-58	DEG
UL116	UL116	CMV	2251.47	10.8728	0.604984	16.3192	7.20965e-60	3.85887e-58	DEG
UL10	UL10	CMV	2323.22	10.893	0.606314	16.3167	7.50887e-60	4.00717e-58	DEG
ENSG00000184009.5	ACTG1	protein_coding	19462.7	-2.5927	0.0976742	-16.3063	8.90229e-60	4.73681e-58	DEG
ENSG00000234741.3	GAS5	processed_transcript	9617.09	-2.67791	0.102914	-16.3041	9.23306e-60	4.8984e-58	DEG
UL53	UL53	CMV	2240.85	10.8646	0.605355	16.2956	1.06024e-59	5.60841e-58	DEG
ENSG00000148700.9	ADD3	protein_coding	9389.82	-2.24905	0.0769244	-16.2373	2.74683e-59	1.44877e-57	DEG
UL130	UL130	CMV	2182.02	10.8318	0.605958	16.2252	3.34576e-59	1.75954e-57	DEG
ENSG00000187134.8	AKR1C1	protein_coding	1902.79	-3.18892	0.135485	-16.1562	1.02702e-58	5.38544e-57	DEG
ENSG00000120756.8	PLS1	protein_coding	905.394	4.38465	0.209869	16.1275	1.63548e-58	8.55127e-57	DEG
ENSG00000196628.9	TCF4	protein_coding	8093.26	-2.40581	0.0873243	-16.0988	2.60189e-58	1.35651e-56	DEG
RL11	RL11	CMV	2109.09	10.7678	0.609177	16.0344	7.34404e-58	3.81785e-56	DEG
ENSG00000174348.9	PODN	protein_coding	1182.97	-3.42293	0.151331	-16.0108	1.07377e-57	5.56605e-56	DEG
UL92	UL92	CMV	2008.83	10.7227	0.608649	15.9742	1.93241e-57	9.98835e-56	DEG
UL128	UL128	CMV	2001.98	10.7167	0.608925	15.9571	2.54242e-57	1.3104e-55	DEG
ENSG00000049130.9	KITLG	protein_coding	7192.73	-2.35143	0.0847208	-15.9516	2.77871e-57	1.42811e-55	DEG
ENSG00000163251.3	FZD5	protein_coding	791.982	4.10362	0.194687	15.9415	3.26204e-57	1.67177e-55	DEG
UL70	UL70	CMV	1966.34	10.698	0.608961	15.9255	4.21929e-57	2.15625e-55	DEG
UL9	UL9	CMV	1989.88	10.7021	0.609859	15.9088	5.50848e-57	2.80715e-55	DEG
ENSG00000131171.8	SH3BGRL	protein_coding	6991.04	-2.35666	0.0853508	-15.8951	6.85113e-57	3.48157e-55	DEG
ENSG00000233608.2	TWIST2	protein_coding	5182.67	-2.75644	0.11054	-15.8897	7.46573e-57	3.78326e-55	DEG
ENSG00000112246.5	SIM1	protein_coding	4514.72	-2.55985	0.0982167	-15.8817	8.489e-57	4.28979e-55	DEG
ENSG00000106823.8	ECM2	protein_coding	513.877	-5.89776	0.308776	-15.8619	1.16383e-56	5.86485e-55	DEG
ENSG00000131737.5	KRT34	protein_coding	652.909	-4.46427	0.218645	-15.8443	1.53921e-56	7.73495e-55	DEG
ENSG00000131979.14	GCH1	protein_coding	1198.16	4.0666	0.193583	15.8413	1.61494e-56	8.09304e-55	DEG
ENSG00000115884.6	SDC1	protein_coding	8525.95	-2.47732	0.0933148	-15.8316	1.88487e-56	9.41965e-55	DEG
ENSG00000150347.10	ARID5B	protein_coding	5089.24	-2.59142	0.100616	-15.8168	2.38196e-56	1.18711e-54	DEG
ENSG00000148848.10	ADAM12	protein_coding	2401.54	-3.09607	0.132582	-15.8095	2.67373e-56	1.32886e-54	DEG
ENSG00000117676.9	RPS6KA1	protein_coding	883.189	3.83353	0.17928	15.8051	2.87014e-56	1.42257e-54	DEG
ENSG00000162849.11	KIF26B	protein_coding	1594.93	-3.23473	0.141441	-15.7998	3.12307e-56	1.5437e-54	DEG
ENSG00000171345.9	KRT19	protein_coding	1654.09	-3.27605	0.144339	-15.7688	5.10041e-56	2.51421e-54	DEG
ENSG00000205542.6	TMSB4X	protein_coding	91540.4	-2.24038	0.0786985	-15.7611	5.76146e-56	2.83235e-54	DEG
UL16	UL16	CMV	1859.73	10.6246	0.610786	15.7577	6.07756e-56	2.97965e-54	DEG
ENSG00000156453.9	PCDH1	protein_coding	592.523	5.15341	0.26385	15.7416	7.84891e-56	3.83769e-54	DEG
ENSG00000003989.12	SLC7A2	protein_coding	791.752	4.22121	0.205156	15.7013	1.48249e-55	7.22903e-54	DEG
ENSG00000105767.2	CADM4	protein_coding	562.105	5.9083	0.312793	15.6918	1.71979e-55	8.36362e-54	DEG
UL73	UL73	CMV	1813.2	10.5926	0.611467	15.6879	1.8311e-55	8.88108e-54	DEG
ENSG00000142173.10	COL6A2	protein_coding	130207	-2.12074	0.0715379	-15.6664	2.5658e-55	1.24112e-53	DEG
ENSG00000116132.7	PRRX1	protein_coding	11188	-2.18096	0.075459	-15.6503	3.30616e-55	1.59498e-53	DEG
ENSG00000197147.8	LRRC8B	protein_coding	617.565	4.82145	0.245332	15.5766	1.04924e-54	5.04837e-53	DEG
ENSG00000169504.10	CLIC4	protein_coding	65969	-2.0316	0.0662447	-15.5725	1.11939e-54	5.37158e-53	DEG
UL85	UL85	CMV	1734.63	10.5349	0.612868	15.5578	1.40898e-54	6.74333e-53	DEG
ENSG00000105825.7	TFPI2	protein_coding	3716.23	3.16212	0.139113	15.5422	1.79794e-54	8.58219e-53	DEG
US11	US11	CMV	1725.6	10.5268	0.613171	15.537	1.94886e-54	9.27811e-53	DEG
ENSG00000151729.6	SLC25A4	protein_coding	2425.58	2.70884	0.110222	15.5037	3.27645e-54	1.55575e-52	DEG
ENSG00000139679.11	LPAR6	protein_coding	1181.61	-4.51852	0.227011	-15.4993	3.50638e-54	1.66058e-52	DEG
ENSG00000174807.3	CD248	protein_coding	1978	-2.9385	0.125111	-15.4943	3.79143e-54	1.79088e-52	DEG
ENSG00000169604.15	ANTXR1	protein_coding	4875.96	-2.38052	0.08911	-15.4923	3.90958e-54	1.84188e-52	DEG
ENSG00000135679.17	MDM2	protein_coding	16014.9	-2.53951	0.0996297	-15.4524	7.27325e-54	3.41767e-52	DEG
UL69	UL69	CMV	1667.62	10.485	0.613959	15.449	7.66812e-54	3.59388e-52	DEG
ENSG00000112655.11	PTK7	protein_coding	19319.1	-2.14859	0.0745324	-15.4106	1.38981e-53	6.49691e-52	DEG
ENSG00000136153.15	LMO7	protein_coding	6080.5	-2.49538	0.0970443	-15.4093	1.41805e-53	6.61183e-52	DEG
UL30	UL30	CMV	1652.22	10.4601	0.615687	15.3652	2.80321e-53	1.30367e-51	DEG
UL37	UL37	CMV	1607.28	10.4345	0.615428	15.33	4.82332e-53	2.2374e-51	DEG
ENSG00000158201.5	ABHD3	protein_coding	1690.58	3.00217	0.130664	15.323	5.36931e-53	2.4843e-51	DEG
ENSG00000171208.5	NETO2	protein_coding	5394.36	2.60809	0.105465	15.2476	1.70716e-52	7.87863e-51	DEG
ENSG00000126709.10	IFI6	protein_coding	12538.7	2.3007	0.0853387	15.2416	1.87249e-52	8.61966e-51	DEG
ENSG00000134853.7	PDGFRA	protein_coding	5680.49	-2.37109	0.0902146	-15.1981	3.64076e-52	1.6717e-50	DEG
ENSG00000115641.14	FHL2	protein_coding	2773.39	-2.62329	0.10683	-15.1951	3.81245e-52	1.74169e-50	DEG
ENSG00000187955.7	COL14A1	protein_coding	1123.8	-3.49623	0.164278	-15.1952	3.80518e-52	1.74169e-50	DEG
UL88	UL88	CMV	1506.5	10.3537	0.617121	15.1569	6.81827e-52	3.10704e-50	DEG
ENSG00000166033.7	HTRA1	protein_coding	9376.71	-2.18607	0.0784802	-15.1129	1.33092e-51	6.04965e-50	DEG
ENSG00000147403.12	RPL10	protein_coding	68189.3	-2.05871	0.0700566	-15.1123	1.34464e-51	6.09671e-50	DEG
ENSG00000131080.10	EDA2R	protein_coding	1309.76	-4.07356	0.203439	-15.108	1.4341e-51	6.48608e-50	DEG
ENSG00000162520.10	SYNC	protein_coding	3494.51	-2.57874	0.10463	-15.0889	1.91667e-51	8.64701e-50	DEG
UL7	UL7	CMV	1460.47	10.3133	0.618125	15.067	2.668e-51	1.20067e-49	DEG
UL139	UL139	CMV	1452.73	10.3066	0.618274	15.0526	3.32119e-51	1.49091e-49	DEG
ENSG00000172183.10	ISG20	protein_coding	535.604	4.66924	0.243908	15.0435	3.80781e-51	1.70512e-49	DEG
ENSG00000182871.10	COL18A1	protein_coding	19918.4	-2.1333	0.075479	-15.0147	5.87965e-51	2.62639e-49	DEG
ENSG00000138061.7	CYP1B1	protein_coding	3103.76	-2.50348	0.100314	-14.9878	8.82731e-51	3.93337e-49	DEG
UL74	UL74	CMV	1452.73	10.2897	0.620184	14.9789	1.00931e-50	4.48636e-49	DEG
ENSG00000095303.10	PTGS1	protein_coding	3192.02	-2.5292	0.102175	-14.9664	1.21749e-50	5.39844e-49	DEG
UL11	UL11	CMV	1416.23	10.2667	0.619877	14.9492	1.57566e-50	6.9695e-49	DEG
ENSG00000136205.12	TNS3	protein_coding	7631.51	-2.3791	0.0924498	-14.9173	2.54275e-50	1.12197e-48	DEG
UL72	UL72	CMV	1375.43	10.236	0.620008	14.8965	3.47167e-50	1.52813e-48	DEG
ENSG00000113070.6	HBEGF	protein_coding	1119.01	3.41745	0.162743	14.8544	6.51436e-50	2.86047e-48	DEG
ENSG00000115318.7	LOXL3	protein_coding	2307.73	-2.7946	0.120859	-14.8487	7.08903e-50	3.10527e-48	DEG
UL124	UL124	CMV	1334.55	10.1955	0.621141	14.8042	1.37679e-49	6.01631e-48	DEG
US13	US13	CMV	1313.03	10.1754	0.621561	14.7619	2.5805e-49	1.12491e-47	DEG
ENSG00000120820.8	GLT8D2	protein_coding	3060.3	-2.83124	0.124073	-14.7593	2.67875e-49	1.16493e-47	DEG
ENSG00000149257.9	SERPINH1	protein_coding	38049.2	-2.08008	0.0732198	-14.7512	3.02278e-49	1.31139e-47	DEG
US17	US17	CMV	1307.2	10.17	0.621663	14.7508	3.04155e-49	1.31638e-47	DEG
ENSG00000198805.7	PNP	protein_coding	1298.52	3.14467	0.145533	14.7366	3.74998e-49	1.61912e-47	DEG
ENSG00000189057.6	FAM111B	protein_coding	2714.75	2.62232	0.110532	14.6774	8.99581e-49	3.87484e-47	DEG
ENSG00000135931.13	ARMC9	protein_coding	3304.03	-2.74357	0.118916	-14.6621	1.12665e-48	4.84136e-47	DEG
ENSG00000086619.9	ERO1LB	protein_coding	3436.99	2.49999	0.102438	14.6428	1.49683e-48	6.41688e-47	DEG
US10	US10	CMV	1250.24	10.1089	0.623502	14.6092	2.45432e-48	1.04967e-46	DEG
ENSG00000124762.9	CDKN1A	protein_coding	16971.4	-2.46525	0.100367	-14.599	2.84935e-48	1.21288e-46	DEG
ENSG00000142871.11	CYR61	protein_coding	1055.99	-3.40607	0.164811	-14.599	2.84919e-48	1.21288e-46	DEG
ENSG00000100100.8	PIK3IP1	protein_coding	1050	-3.69359	0.18467	-14.586	3.44982e-48	1.46504e-46	DEG
ENSG00000150051.9	MKX	protein_coding	7657.61	-2.16125	0.0799726	-14.5205	8.97909e-48	3.80423e-46	DEG
ENSG00000132182.7	NUP210	protein_coding	423.992	6.80322	0.401325	14.4602	2.16288e-47	9.14223e-46	DEG
ENSG00000159403.11	C1R	protein_coding	13372.4	-2.16498	0.080628	-14.4488	2.5512e-47	1.07585e-45	DEG
ENSG00000206560.6	ANKRD28	protein_coding	7948.3	-2.13786	0.0787791	-14.4436	2.75007e-47	1.15701e-45	DEG
ENSG00000170412.12	GPRC5C	protein_coding	505.802	5.10586	0.284884	14.4124	4.32433e-47	1.81512e-45	DEG
ENSG00000141576.10	RNF157	protein_coding	535.036	5.06619	0.283262	14.3549	9.93e-47	4.15842e-45	DEG
UL122	UL122	CMV	1133.27	9.98529	0.626343	14.3456	1.13454e-46	4.74018e-45	DEG
ENSG00000175556.12	LONRF3	protein_coding	451.224	5.68287	0.326554	14.3403	1.22598e-46	5.1104e-45	DEG
ENSG00000118523.5	CTGF	protein_coding	2538.76	-2.65518	0.115699	-14.306	2.00796e-46	8.35079e-45	DEG
ENSG00000180011.6	ZADH2	protein_coding	3991.13	-2.46522	0.102492	-14.296	2.31826e-46	9.61919e-45	DEG
ENSG00000155324.5	GRAMD3	protein_coding	5296.93	-2.24577	0.0875743	-14.2252	6.38871e-46	2.64481e-44	DEG
ENSG00000198542.9	ITGBL1	protein_coding	620.373	-3.98384	0.209863	-14.218	7.08475e-46	2.92626e-44	DEG
ENSG00000176046.7	NUPR1	protein_coding	1770.5	-2.74584	0.123707	-14.1126	3.17572e-45	1.3087e-43	DEG
ENSG00000182759.3	MAFA	protein_coding	446.902	6.0714	0.359652	14.1009	3.7517e-45	1.54254e-43	DEG
ENSG00000074527.7	NTN4	protein_coding	3995.21	-2.36881	0.0972176	-14.0798	5.05185e-45	2.07241e-43	DEG
ENSG00000172667.6	ZMAT3	protein_coding	9873.14	-2.19121	0.0846764	-14.0678	5.99328e-45	2.45304e-43	DEG
US21	US21	CMV	1028.87	9.85646	0.630019	14.0574	6.93463e-45	2.83193e-43	DEG
ENSG00000177465.4	ACOT4	protein_coding	1063.25	3.29712	0.163602	14.0408	8.76716e-45	3.57222e-43	DEG
ENSG00000049323.11	LTBP1	protein_coding	2924.81	-2.42834	0.101901	-14.0169	1.22839e-44	4.99388e-43	DEG
ENSG00000136010.9	ALDH1L2	protein_coding	2863.98	-2.9165	0.136939	-13.9952	1.66668e-44	6.76051e-43	DEG
ENSG00000102024.13	PLS3	protein_coding	12882.7	-2.12036	0.0801728	-13.9743	2.23603e-44	9.04966e-43	DEG
ENSG00000134802.13	SLC43A3	protein_coding	2918.99	2.52833	0.109497	13.9578	2.82016e-44	1.13883e-42	DEG
UL1	UL1	CMV	1030.37	9.8313	0.63304	13.9506	3.11937e-44	1.25685e-42	DEG
ENSG00000154917.6	RAB6B	protein_coding	804.06	3.69014	0.192859	13.9487	3.20228e-44	1.28739e-42	DEG
ENSG00000137463.4	MGARP	protein_coding	2063.45	-2.61032	0.115597	-13.9304	4.13759e-44	1.65972e-42	DEG
ENSG00000170153.6	RNF150	protein_coding	3464.83	-2.36242	0.0979606	-13.9079	5.67561e-44	2.27162e-42	DEG
ENSG00000168785.3	TSPAN5	protein_coding	3294.23	-2.37814	0.0992382	-13.8872	7.57166e-44	3.02382e-42	DEG
ENSG00000116830.7	TTF2	protein_coding	2110.14	2.81925	0.131028	13.8845	7.86774e-44	3.13514e-42	DEG
UL8	UL8	CMV	961.515	9.77213	0.631947	13.8811	8.24554e-44	3.27846e-42	DEG
ENSG00000130513.6	GDF15	protein_coding	3042.81	-2.69511	0.122186	-13.8733	9.20075e-44	3.65024e-42	DEG
ENSG00000145050.11	MANF	protein_coding	4783.6	2.66065	0.119875	13.8532	1.21662e-43	4.81615e-42	DEG
ENSG00000079931.10	MOXD1	protein_coding	10211.5	-2.08507	0.0785288	-13.8175	1.9988e-43	7.89527e-42	DEG
ENSG00000133687.11	TMTC1	protein_coding	6058.67	-2.16226	0.0844013	-13.7706	3.82763e-43	1.50774e-41	DEG
ENSG00000137962.8	ARHGAP29	protein_coding	11324.6	-2.08892	0.0790764	-13.7705	3.83374e-43	1.50774e-41	DEG
ENSG00000138735.11	PDE5A	protein_coding	4967.06	-2.47857	0.107542	-13.7488	5.18154e-43	2.03339e-41	DEG
ENSG00000106327.8	TFR2	protein_coding	367.643	6.28348	0.388296	13.6069	3.64615e-42	1.42776e-40	DEG
ENSG00000166670.5	MMP10	protein_coding	438.993	5.6221	0.340358	13.5801	5.25564e-42	2.05356e-40	DEG
UL79	UL79	CMV	864.705	9.63254	0.635888	13.5756	5.59051e-42	2.1797e-40	DEG
ENSG00000110092.3	CCND1	protein_coding	17535.4	-2.28385	0.0950611	-13.5056	1.44992e-41	5.64099e-40	DEG
ENSG00000150687.7	PRSS23	protein_coding	12049.9	-2.23838	0.0920654	-13.4511	3.03277e-41	1.17738e-39	DEG
ENSG00000182197.6	EXT1	protein_coding	10043.4	-2.18586	0.0882132	-13.4431	3.37865e-41	1.30885e-39	DEG
ENSG00000028137.12	TNFRSF1B	protein_coding	602.744	4.75682	0.279699	13.4316	3.94527e-41	1.52508e-39	DEG
ENSG00000242173.4	ARHGDIG	protein_coding	373.671	5.66105	0.347406	13.4167	4.82581e-41	1.86149e-39	DEG
ENSG00000177181.10	RIMKLA	protein_coding	322.485	7.3424	0.472859	13.4129	5.08223e-41	1.95623e-39	DEG
ENSG00000197614.6	MFAP5	protein_coding	6750.43	-2.15677	0.0863662	-13.3938	6.57256e-41	2.52451e-39	DEG
ENSG00000196139.7	AKR1C3	protein_coding	619.886	-4.43158	0.256256	-13.3912	6.80619e-41	2.6087e-39	DEG
ENSG00000001561.6	ENPP4	protein_coding	1470.87	2.81747	0.135988	13.3649	9.69851e-41	3.70942e-39	DEG
ENSG00000256018.1	HIST1H3G	protein_coding	4854.79	-2.68346	0.12597	-13.364	9.81434e-41	3.74581e-39	DEG
ENSG00000185551.8	NR2F2	protein_coding	2316.73	-2.63418	0.122493	-13.341	1.3364e-40	5.08986e-39	DEG
ENSG00000065923.5	SLC9A7	protein_coding	997.545	-3.44277	0.183704	-13.2973	2.39927e-40	9.11875e-39	DEG
UL76	UL76	CMV	785.786	9.50372	0.639841	13.2904	2.63272e-40	9.98503e-39	DEG
ENSG00000064666.10	CNN2	protein_coding	8499.42	-2.02962	0.0776709	-13.2562	4.15565e-40	1.5728e-38	DEG
UL41A	UL41A	CMV	783.062	9.49171	0.640823	13.2513	4.4368e-40	1.6757e-38	DEG
ENSG00000150938.5	CRIM1	protein_coding	7035.25	-2.20203	0.0908867	-13.2256	6.24589e-40	2.35405e-38	DEG
ENSG00000166073.4	GPR176	protein_coding	13661.7	-2.03908	0.0787599	-13.193	9.63225e-40	3.62281e-38	DEG
UL15A	UL15A	CMV	750.895	9.45123	0.640737	13.1899	1.00364e-39	3.76697e-38	DEG
ENSG00000135744.7	AGT	protein_coding	915.053	3.9983	0.227435	13.1831	1.0976e-39	4.1111e-38	DEG
ENSG00000152503.5	TRIM36	protein_coding	500.304	4.8747	0.29455	13.1547	1.60002e-39	5.98058e-38	DEG
ENSG00000123096.7	SSPN	protein_coding	1360.28	-2.97073	0.149893	-13.1476	1.75575e-39	6.54912e-38	DEG
UL131A	UL131A	CMV	748.738	9.43779	0.64196	13.1438	1.84724e-39	6.87622e-38	DEG
ENSG00000148671.9	ADIRF	protein_coding	1508.52	-2.80098	0.137455	-13.1023	3.19585e-39	1.18719e-37	DEG
ENSG00000087086.9	FTL	protein_coding	42469.5	-2.17423	0.0896304	-13.1008	3.25759e-39	1.20764e-37	DEG
ENSG00000117228.9	GBP1	protein_coding	2056.32	-3.13755	0.163171	-13.1001	3.28921e-39	1.21687e-37	DEG
ENSG00000109790.12	KLHL5	protein_coding	6545.14	-2.08173	0.0827843	-13.0669	5.09294e-39	1.88033e-37	DEG
ENSG00000184916.4	JAG2	protein_coding	553.41	3.93772	0.22538	13.0345	7.78347e-39	2.86784e-37	DEG
ENSG00000187800.9	PEAR1	protein_coding	1280.64	-2.9061	0.146358	-13.0235	8.99183e-39	3.30633e-37	DEG
UL17	UL17	CMV	702.945	9.36447	0.643281	13.0028	1.17888e-38	4.32601e-37	DEG
ENSG00000112379.8	KIAA1244	protein_coding	1343.02	3.57106	0.198024	12.9836	1.51567e-38	5.55061e-37	DEG
ENSG00000151917.13	BEND6	protein_coding	1050.11	-3.01273	0.155113	-12.9759	1.67648e-38	6.1271e-37	DEG
ENSG00000106034.13	CPED1	protein_coding	4943.49	-2.29043	0.0995215	-12.9664	1.89788e-38	6.92231e-37	DEG
ENSG00000102996.4	MMP15	protein_coding	1468.34	2.73395	0.133763	12.9628	1.98794e-38	7.23619e-37	DEG
ENSG00000183873.11	SCN5A	protein_coding	437.225	4.71156	0.286959	12.9341	2.89057e-38	1.05006e-36	DEG
ENSG00000007968.6	E2F2	protein_coding	957.299	3.20856	0.17108	12.9095	3.97981e-38	1.44286e-36	DEG
ENSG00000165105.9	RASEF	protein_coding	712.696	3.77458	0.214996	12.9053	4.20377e-38	1.52101e-36	DEG
ENSG00000243649.4	CFB	protein_coding	999.447	3.11546	0.163927	12.9049	4.22373e-38	1.52518e-36	DEG
ENSG00000248698.1	LINC01085	lincRNA	325.76	-5.6726	0.362203	-12.9005	4.47106e-38	1.61127e-36	DEG
ENSG00000137501.12	SYTL2	protein_coding	2373.88	-2.58436	0.123414	-12.8377	1.00802e-37	3.62547e-36	DEG
ENSG00000204386.6	NEU1	protein_coding	13442	1.98466	0.0768143	12.8187	1.2886e-37	4.62541e-36	DEG
ENSG00000100097.7	LGALS1	protein_coding	62892	-1.98252	0.0768297	-12.7883	1.90693e-37	6.83135e-36	DEG
ENSG00000172346.10	CSDC2	protein_coding	1010.57	-3.02454	0.15844	-12.778	2.17584e-37	7.77926e-36	DEG
ENSG00000153162.8	BMP6	protein_coding	343.112	5.37745	0.342842	12.7681	2.46981e-37	8.81287e-36	DEG
ENSG00000127824.9	TUBA4A	protein_coding	744.542	3.51313	0.19691	12.7628	2.6438e-37	9.41514e-36	DEG
ENSG00000094804.5	CDC6	protein_coding	3622.02	2.26763	0.0996753	12.7176	4.71919e-37	1.67731e-35	DEG
ENSG00000142937.7	RPS8	protein_coding	56589.7	-1.83131	0.0655491	-12.6823	7.41456e-37	2.63013e-35	DEG
ENSG00000104332.7	SFRP1	protein_coding	10045.5	-2.0109	0.0798761	-12.6559	1.03821e-36	3.67559e-35	DEG
ENSG00000166046.6	TCP11L2	protein_coding	1587.78	-2.63346	0.129136	-12.6491	1.13107e-36	3.99652e-35	DEG
ENSG00000102760.12	RGCC	protein_coding	2633.91	-2.51474	0.1199	-12.6333	1.38377e-36	4.87989e-35	DEG
ENSG00000183098.6	GPC6	protein_coding	1887.56	-2.86598	0.147856	-12.6203	1.63249e-36	5.74578e-35	DEG
ENSG00000013364.14	MVP	protein_coding	6174.38	-2.07232	0.085045	-12.6089	1.88588e-36	6.62474e-35	DEG
ENSG00000054967.8	RELT	protein_coding	1340.65	3.20276	0.174729	12.6067	1.93895e-36	6.79796e-35	DEG
ENSG00000259716.1	RP5-977B1.11	antisense	788.818	-3.30113	0.182899	-12.5814	2.67107e-36	9.34668e-35	DEG
ENSG00000170558.4	CDH2	protein_coding	9333.59	-2.06092	0.0843645	-12.5755	2.8806e-36	1.00604e-34	DEG
ENSG00000164761.4	TNFRSF11B	protein_coding	16752	-4.72836	0.29654	-12.5728	2.97793e-36	1.03803e-34	DEG
ENSG00000140044.8	JDP2	protein_coding	1604.93	-2.68625	0.134122	-12.5725	2.99252e-36	1.04111e-34	DEG
ENSG00000165730.10	STOX1	protein_coding	367.113	4.67108	0.292087	12.5685	3.14766e-36	1.09298e-34	DEG
ENSG00000175352.6	NRIP3	protein_coding	3188.68	2.29677	0.103332	12.5495	3.99915e-36	1.38599e-34	DEG
ENSG00000113328.14	CCNG1	protein_coding	19546	-1.85229	0.0680291	-12.5283	5.22539e-36	1.80751e-34	DEG
ENSG00000168209.4	DDIT4	protein_coding	2951.39	-2.26799	0.101216	-12.5276	5.27376e-36	1.82076e-34	DEG
ENSG00000184185.5	KCNJ12	protein_coding	308.72	6.6012	0.44764	12.5127	6.35912e-36	2.19129e-34	DEG
ENSG00000163293.7	NIPAL1	protein_coding	782.09	3.50952	0.200915	12.4904	8.41863e-36	2.89546e-34	DEG
ENSG00000143674.6	MLK4	protein_coding	463.027	4.32126	0.266088	12.4818	9.38319e-36	3.22109e-34	DEG
ENSG00000072657.4	TRHDE	protein_coding	2386.05	-2.53648	0.123107	-12.4808	9.49831e-36	3.25443e-34	DEG
ENSG00000175879.7	HOXD8	protein_coding	385.315	4.46281	0.277504	12.4785	9.78714e-36	3.34705e-34	DEG
ENSG00000170271.6	FAXDC2	protein_coding	567.194	-3.64651	0.212163	-12.474	1.03549e-35	3.53455e-34	DEG
ENSG00000117592.8	PRDX6	protein_coding	24490	-1.95869	0.0768661	-12.4722	1.05923e-35	3.60198e-34	DEG
ENSG00000138678.6	AGPAT9	protein_coding	405.495	4.52053	0.28227	12.4722	1.05863e-35	3.60198e-34	DEG
ENSG00000102393.5	GLA	protein_coding	2831.8	2.34271	0.107661	12.4717	1.06515e-35	3.61531e-34	DEG
ENSG00000151388.6	ADAMTS12	protein_coding	6378.49	-2.17737	0.0944238	-12.469	1.10165e-35	3.7322e-34	DEG
ENSG00000197822.6	OCLN	protein_coding	1135.99	3.46782	0.198353	12.4416	1.55399e-35	5.2548e-34	DEG
ENSG00000197702.7	PARVA	protein_coding	6584.19	-2.02752	0.0826764	-12.4283	1.83568e-35	6.19577e-34	DEG
ENSG00000135914.5	HTR2B	protein_coding	453.065	-8.58127	0.613775	-12.3519	4.7597e-35	1.6035e-33	DEG
ENSG00000124882.3	EREG	protein_coding	10309.6	-2.27522	0.103299	-12.3449	5.18846e-35	1.74469e-33	DEG
ENSG00000134321.7	RSAD2	protein_coding	552.542	4.12588	0.253245	12.3433	5.29523e-35	1.77729e-33	DEG
ENSG00000158050.4	DUSP2	protein_coding	642.907	3.59297	0.210288	12.3306	6.20076e-35	2.07737e-33	DEG
ENSG00000164741.10	DLC1	protein_coding	4793.54	-2.10387	0.0895837	-12.3222	6.87805e-35	2.30001e-33	DEG
ENSG00000103145.6	HCFC1R1	protein_coding	1056.68	-2.93985	0.157763	-12.2959	9.52581e-35	3.17955e-33	DEG
ENSG00000123243.10	ITIH5	protein_coding	1446.2	-2.80775	0.147248	-12.2769	1.20505e-34	4.01482e-33	DEG
ENSG00000170955.9	PRKCDBP	protein_coding	9350.17	-2.21722	0.0992253	-12.2672	1.358e-34	4.51608e-33	DEG
ENSG00000137752.18	CASP1	protein_coding	464.509	-4.07691	0.251565	-12.2311	2.12119e-34	7.04119e-33	DEG
ENSG00000145012.8	LPP	protein_coding	9649.63	-2.08348	0.088692	-12.2162	2.5461e-34	8.43616e-33	DEG
ENSG00000163513.13	TGFBR2	protein_coding	5974.45	-2.09756	0.0900003	-12.1951	3.30022e-34	1.09149e-32	DEG
ENSG00000155962.8	CLIC2	protein_coding	450.166	-3.98824	0.245293	-12.1823	3.8616e-34	1.27482e-32	DEG
ENSG00000153071.10	DAB2	protein_coding	4822.96	-2.17157	0.0962065	-12.1776	4.09052e-34	1.34793e-32	DEG
ENSG00000151136.10	BTBD11	protein_coding	337.07	4.82494	0.314191	12.1739	4.27866e-34	1.40737e-32	DEG
ENSG00000101412.9	E2F1	protein_coding	2123.15	2.83494	0.150783	12.1694	4.52285e-34	1.48499e-32	DEG
ENSG00000011028.9	MRC2	protein_coding	20107.4	-2.00871	0.0830833	-12.141	6.40618e-34	2.09953e-32	DEG
ENSG00000124749.12	COL21A1	protein_coding	305.387	-5.67493	0.385415	-12.1296	7.35979e-34	2.4077e-32	DEG
ENSG00000173083.10	HPSE	protein_coding	747.249	3.45773	0.202634	12.1289	7.42182e-34	2.42361e-32	DEG
ENSG00000114270.11	COL7A1	protein_coding	4038.84	-2.21522	0.100201	-12.1278	7.52094e-34	2.45156e-32	DEG
ENSG00000100290.2	BIK	protein_coding	373.722	7.73249	0.555957	12.1097	9.38065e-34	3.05226e-32	DEG
ENSG00000141934.5	PPAP2C	protein_coding	558.098	3.8531	0.236442	12.0668	1.58165e-33	5.13709e-32	DEG
ENSG00000165716.5	FAM69B	protein_coding	285.314	5.33047	0.359618	12.0419	2.14077e-33	6.94063e-32	DEG
ENSG00000111665.7	CDCA3	protein_coding	968.981	-3.37828	0.197565	-12.038	2.24292e-33	7.2588e-32	DEG
ENSG00000081181.3	ARG2	protein_coding	936.029	3.03789	0.169352	12.0335	2.36916e-33	7.65365e-32	DEG
ENSG00000071073.8	MGAT4A	protein_coding	253.13	6.67358	0.471704	12.0278	2.53705e-33	8.18143e-32	DEG
ENSG00000068615.12	REEP1	protein_coding	268.135	6.25698	0.437501	12.0159	2.93063e-33	9.43381e-32	DEG
ENSG00000103942.8	HOMER2	protein_coding	406.032	4.04376	0.253359	12.0136	3.01273e-33	9.68086e-32	DEG
ENSG00000108691.5	CCL2	protein_coding	3160.75	-2.70044	0.141569	-12.0114	3.09568e-33	9.92976e-32	DEG
ENSG00000185650.8	ZFP36L1	protein_coding	1924.91	-2.5958	0.133011	-11.9975	3.6611e-33	1.17227e-31	DEG
ENSG00000003436.10	TFPI	protein_coding	2800.04	-2.46914	0.122557	-11.9874	4.13738e-33	1.32243e-31	DEG
ENSG00000245848.2	CEBPA	protein_coding	838.63	4.01783	0.252337	11.9595	5.78921e-33	1.84714e-31	DEG
US33	US33	CMV	474.475	8.85158	0.65863	11.9211	9.19121e-33	2.92743e-31	DEG
ENSG00000117410.9	ATP6V0B	protein_coding	13225.2	2.09024	0.0915099	11.9139	1.00134e-32	3.18371e-31	DEG
ENSG00000183798.4	EMILIN3	protein_coding	306.792	5.11085	0.345515	11.8977	1.2161e-32	3.85972e-31	DEG
ENSG00000135111.10	TBX3	protein_coding	5609.1	-2.21263	0.102048	-11.883	1.45061e-32	4.59598e-31	DEG
ENSG00000103175.6	WFDC1	protein_coding	693.428	-3.39512	0.201567	-11.8825	1.45871e-32	4.61354e-31	DEG
ENSG00000138829.6	FBN2	protein_coding	12357.2	-2.38105	0.116782	-11.8259	2.86688e-32	9.05144e-31	DEG
ENSG00000167996.11	FTH1	protein_coding	20002.7	-1.83507	0.0707026	-11.811	3.42625e-32	1.07987e-30	DEG
ENSG00000127328.17	RAB3IP	protein_coding	753.844	3.3185	0.196321	11.8098	3.47518e-32	1.09338e-30	DEG
ENSG00000185818.7	NAT8L	protein_coding	294.922	5.8513	0.4111	11.8008	3.86602e-32	1.21424e-30	DEG
ENSG00000178409.9	BEND3	protein_coding	658.191	3.52654	0.214507	11.7784	5.04586e-32	1.58206e-30	DEG
ENSG00000087085.9	ACHE	protein_coding	273.709	5.72589	0.401789	11.7621	6.11833e-32	1.915e-30	DEG
ENSG00000166448.10	TMEM130	protein_coding	383.677	-4.39472	0.288939	-11.7489	7.15281e-32	2.23491e-30	DEG
ENSG00000139209.11	SLC38A4	protein_coding	529.938	-3.56248	0.218839	-11.7094	1.14054e-31	3.55749e-30	DEG
ENSG00000180998.7	GPR137C	protein_coding	540.055	3.53706	0.216862	11.699	1.29004e-31	4.01689e-30	DEG
ENSG00000166750.5	SLFN5	protein_coding	5138.34	-2.32565	0.113461	-11.6837	1.54343e-31	4.79763e-30	DEG
ENSG00000146054.13	TRIM7	protein_coding	702.579	3.23841	0.193107	11.5916	4.54769e-31	1.41119e-29	DEG
ENSG00000138395.10	CDK15	protein_coding	352.444	-5.07418	0.351908	-11.5774	5.36391e-31	1.66162e-29	DEG
ENSG00000100473.11	COCH	protein_coding	309.121	6.35144	0.463181	11.5537	7.07268e-31	2.18721e-29	DEG
ENSG00000115295.15	CLIP4	protein_coding	5299.76	-2.03846	0.090083	-11.5278	9.55772e-31	2.95066e-29	DEG
ENSG00000203875.6	SNHG5	processed_transcript	2236.51	-2.31922	0.114802	-11.4912	1.46074e-30	4.50193e-29	DEG
ENSG00000185112.4	FAM43A	protein_coding	5947.31	-2.25174	0.109104	-11.4729	1.80515e-30	5.5539e-29	DEG
ENSG00000272695.1	GAS6-AS2	lincRNA	664.877	-3.28712	0.199443	-11.4676	1.91973e-30	5.89642e-29	DEG
ENSG00000204388.5	HSPA1B	protein_coding	2242.21	2.44289	0.125932	11.4576	2.15279e-30	6.60104e-29	DEG
ENSG00000174307.5	PHLDA3	protein_coding	5112.06	-2.07229	0.0936075	-11.4552	2.21444e-30	6.77858e-29	DEG
ENSG00000107984.5	DKK1	protein_coding	17719	-5.38636	0.383616	-11.4343	2.81942e-30	8.6159e-29	DEG
ENSG00000021826.10	CPS1	protein_coding	507.393	-3.74179	0.240449	-11.4028	4.04885e-30	1.23521e-28	DEG
ENSG00000175938.6	ORAI3	protein_coding	2604.15	-2.33445	0.117218	-11.3844	5.00123e-30	1.52319e-28	DEG
UL147	UL147	CMV	390.137	8.59222	0.667172	11.3797	5.27851e-30	1.60493e-28	DEG
ENSG00000158220.9	ESYT3	protein_coding	265.818	5.11276	0.362467	11.3466	7.71159e-30	2.34078e-28	DEG
ENSG00000169083.11	AR	protein_coding	2762.72	-2.34741	0.11881	-11.3409	8.23196e-30	2.49455e-28	DEG
ENSG00000134871.13	COL4A2	protein_coding	38431.8	-1.7475	0.0659798	-11.3292	9.41133e-30	2.84716e-28	DEG
ENSG00000197415.7	VEPH1	protein_coding	1165.04	-2.74138	0.153973	-11.3096	1.17565e-29	3.5507e-28	DEG
ENSG00000131634.9	TMEM204	protein_coding	3237.92	-2.21679	0.107836	-11.2838	1.57859e-29	4.75972e-28	DEG
UL146	UL146	CMV	377.013	8.54554	0.668849	11.2814	1.62171e-29	4.8816e-28	DEG
ENSG00000049239.8	H6PD	protein_coding	3486.05	-2.17141	0.103987	-11.265	1.95285e-29	5.8686e-28	DEG
ENSG00000250786.1	SNHG18	lincRNA	1528.4	-2.59229	0.141684	-11.2383	2.6437e-29	7.93153e-28	DEG
ENSG00000172348.10	RCAN2	protein_coding	1830.83	-2.33704	0.119016	-11.2341	2.77178e-29	8.30203e-28	DEG
ENSG00000163624.5	CDS1	protein_coding	368.134	8.51647	0.669627	11.2249	3.07851e-29	9.20552e-28	DEG
ENSG00000184792.11	OSBP2	protein_coding	357.704	4.16161	0.282125	11.2064	3.79366e-29	1.13253e-27	DEG
ENSG00000105989.4	WNT2	protein_coding	969.431	-2.75591	0.156777	-11.2	4.07568e-29	1.21471e-27	DEG
ENSG00000175061.13	C17orf76-AS1	processed_transcript	20611.2	-1.8067	0.0720453	-11.1971	4.21434e-29	1.25398e-27	DEG
ENSG00000005243.5	COPZ2	protein_coding	1692.76	-2.40369	0.125654	-11.1711	5.64926e-29	1.67817e-27	DEG
ENSG00000241749.3	RPSAP52	pseudogene	314.519	-4.40916	0.305333	-11.1654	6.02303e-29	1.78627e-27	DEG
ENSG00000174672.11	BRSK2	protein_coding	297.671	5.62528	0.415499	11.1319	8.77716e-29	2.59882e-27	DEG
ENSG00000215612.5	HMX1	protein_coding	353.817	8.46496	0.671286	11.1204	9.98382e-29	2.95126e-27	DEG
ENSG00000165244.6	ZNF367	protein_coding	3006.65	2.13405	0.101982	11.1201	1.00205e-28	2.95727e-27	DEG
ENSG00000072110.9	ACTN1	protein_coding	11755.4	-1.80419	0.0724391	-11.1016	1.23227e-28	3.63077e-27	DEG
ENSG00000171551.7	ECEL1	protein_coding	284.609	7.61984	0.596442	11.0989	1.27036e-28	3.73692e-27	DEG
ENSG00000143995.15	MEIS1	protein_coding	2525.07	-2.2746	0.115182	-11.0659	1.83562e-28	5.39093e-27	DEG
ENSG00000069275.12	NUCKS1	protein_coding	16564.9	-1.81667	0.0738661	-11.0561	2.04868e-28	6.00693e-27	DEG
ENSG00000047365.7	ARAP2	protein_coding	265.777	7.30056	0.570131	11.0511	2.16598e-28	6.34056e-27	DEG
ENSG00000128268.11	MGAT3	protein_coding	298.789	5.35771	0.394615	11.0429	2.3716e-28	6.93127e-27	DEG
ENSG00000184060.6	ADAP2	protein_coding	367.272	4.04418	0.275683	11.0423	2.38784e-28	6.96749e-27	DEG
ENSG00000162444.11	RBP7	protein_coding	305.212	7.9654	0.630938	11.0398	2.45693e-28	7.15755e-27	DEG
UL48A	UL48A	CMV	348.15	8.43081	0.673517	11.0328	2.65349e-28	7.71774e-27	DEG
ENSG00000176907.3	C8orf4	protein_coding	424.898	-3.8381	0.25782	-11.0081	3.49448e-28	1.01474e-26	DEG
ENSG00000104435.9	STMN2	protein_coding	232.88	-6.62867	0.511472	-11.0049	3.62116e-28	1.04985e-26	DEG
ENSG00000145390.7	USP53	protein_coding	4601.94	-2.31691	0.119928	-10.9808	4.72596e-28	1.36796e-26	DEG
ENSG00000133134.7	BEX2	protein_coding	259.701	5.93293	0.449789	10.9672	5.49392e-28	1.58771e-26	DEG
ENSG00000090674.11	MCOLN1	protein_coding	1523.89	2.52887	0.139451	10.9635	5.72481e-28	1.6518e-26	DEG
ENSG00000049540.12	ELN	protein_coding	1194.5	-2.92731	0.175926	-10.9552	6.2724e-28	1.80691e-26	DEG
ENSG00000224259.1	RP11-48O20.4	lincRNA	245.754	-7.27406	0.57287	-10.952	6.50168e-28	1.86998e-26	DEG
ENSG00000143341.7	HMCN1	protein_coding	881.916	-3.28705	0.208835	-10.9515	6.53828e-28	1.87753e-26	DEG
ENSG00000244694.3	PTCHD4	protein_coding	289.281	-4.45351	0.315464	-10.9474	6.83911e-28	1.9608e-26	DEG
ENSG00000066248.10	NGEF	protein_coding	256.526	5.16943	0.380884	10.9467	6.89042e-28	1.97238e-26	DEG
ENSG00000124406.12	ATP8A1	protein_coding	473.274	4.29951	0.301999	10.9255	8.70228e-28	2.48709e-26	DEG
ENSG00000100311.12	PDGFB	protein_coding	241.397	6.32048	0.487542	10.9129	1.00047e-27	2.8548e-26	DEG
ENSG00000164010.9	ERMAP	protein_coding	1576.95	-2.43166	0.131415	-10.8942	1.22801e-27	3.49857e-26	DEG
ENSG00000171714.10	ANO5	protein_coding	327.252	8.35686	0.675401	10.8926	1.25043e-27	3.55686e-26	DEG
ENSG00000154548.8	SRSF12	protein_coding	252.231	5.69891	0.431684	10.8851	1.3578e-27	3.85621e-26	DEG
ENSG00000198885.5	ITPRIPL1	protein_coding	365.346	4.19208	0.293802	10.8648	1.69668e-27	4.81107e-26	DEG
ENSG00000185088.8	RPS27L	protein_coding	10917.2	-1.88108	0.0811935	-10.8517	1.95809e-27	5.54362e-26	DEG
ENSG00000168734.9	PKIG	protein_coding	1359.76	-2.71521	0.158369	-10.8305	2.4688e-27	6.9786e-26	DEG
ENSG00000197635.5	DPP4	protein_coding	2327.69	-2.30341	0.120401	-10.8255	2.60515e-27	7.35255e-26	DEG
ENSG00000149380.7	P4HA3	protein_coding	559.023	-3.28375	0.211672	-10.7891	3.87513e-27	1.09198e-25	DEG
ENSG00000145248.6	SLC10A4	protein_coding	251.046	7.17532	0.572563	10.7854	4.03534e-27	1.13536e-25	DEG
ENSG00000263873.1	RP11-334E6.12	sense_intronic	641.931	-3.16422	0.200744	-10.781	4.23302e-27	1.18912e-25	DEG
ENSG00000160013.4	PTGIR	protein_coding	1352.23	-2.45264	0.135228	-10.7422	6.45153e-27	1.80953e-25	DEG
ENSG00000187079.10	TEAD1	protein_coding	11264.7	-1.8574	0.0798624	-10.7359	6.90123e-27	1.93267e-25	DEG
ENSG00000140682.14	TGFB1I1	protein_coding	1608.34	-2.36943	0.127639	-10.729	7.44287e-27	2.08113e-25	DEG
ENSG00000167680.11	SEMA6B	protein_coding	304.135	8.26406	0.678265	10.7098	9.1594e-27	2.55714e-25	DEG
ENSG00000189058.4	APOD	protein_coding	1792.78	-2.36145	0.127201	-10.7032	9.8347e-27	2.74144e-25	DEG
ENSG00000117525.9	F3	protein_coding	3031.98	-2.32381	0.123847	-10.6891	1.14521e-26	3.18739e-25	DEG
ENSG00000173114.8	LRRN3	protein_coding	1064.85	-2.95497	0.182958	-10.6853	1.19219e-26	3.31304e-25	DEG
ENSG00000163975.7	MFI2	protein_coding	451.104	3.64919	0.248118	10.6771	1.30236e-26	3.61364e-25	DEG
ENSG00000130734.5	ATG4D	protein_coding	1903.84	2.27895	0.119842	10.672	1.37634e-26	3.81306e-25	DEG
ENSG00000186891.9	TNFRSF18	protein_coding	248.945	5.40026	0.412965	10.6553	1.6474e-26	4.55706e-25	DEG
ENSG00000128590.4	DNAJB9	protein_coding	2201.38	2.51811	0.142819	10.6296	2.17111e-26	5.99658e-25	DEG
ENSG00000139178.6	C1RL	protein_coding	1431.68	-2.43694	0.13519	-10.6291	2.1823e-26	6.01829e-25	DEG
ENSG00000187720.10	THSD4	protein_coding	2212.2	-2.22059	0.114876	-10.6253	2.27292e-26	6.25867e-25	DEG
ENSG00000164440.10	TXLNB	protein_coding	312.336	-4.1438	0.296011	-10.6205	2.39155e-26	6.5753e-25	DEG
ENSG00000164294.9	GPX8	protein_coding	14783.9	-1.78067	0.0735392	-10.6157	2.51921e-26	6.91578e-25	DEG
ENSG00000177374.8	HIC1	protein_coding	3619.62	-2.03504	0.0975243	-10.6131	2.59016e-26	7.09979e-25	DEG
ENSG00000091136.9	LAMB1	protein_coding	8490.33	-2.04348	0.0984117	-10.6032	2.87938e-26	7.88061e-25	DEG
ENSG00000113575.5	PPP2CA	protein_coding	6479.55	2.2693	0.119735	10.6009	2.95196e-26	8.06705e-25	DEG
ENSG00000196549.6	MME	protein_coding	7559.96	-2.08049	0.102038	-10.5891	3.34785e-26	9.13515e-25	DEG
ENSG00000184838.10	PRR16	protein_coding	637.463	-3.04641	0.193471	-10.5773	3.79688e-26	1.03448e-24	DEG
ENSG00000183578.5	TNFAIP8L3	protein_coding	233.542	6.84859	0.554124	10.5547	4.83362e-26	1.31496e-24	DEG
ENSG00000120913.19	PDLIM2	protein_coding	5000.17	-2.0663	0.101169	-10.5398	5.66491e-26	1.5388e-24	DEG
ENSG00000197256.6	KANK2	protein_coding	3830	-2.0537	0.100028	-10.5341	6.01673e-26	1.63191e-24	DEG
ENSG00000182492.11	BGN	protein_coding	2295.24	-2.34257	0.127565	-10.5246	6.65393e-26	1.80204e-24	DEG
UL149	UL149	CMV	285.423	8.17177	0.682193	10.5128	7.54121e-26	2.03928e-24	DEG
ENSG00000197943.5	PLCG2	protein_coding	270.606	4.44597	0.32822	10.499	8.7313e-26	2.35758e-24	DEG
ENSG00000125740.9	FOSB	protein_coding	355.534	-4.04992	0.291269	-10.4711	1.17225e-25	3.16052e-24	DEG
ENSG00000204520.8	MICA	protein_coding	7213.87	1.86127	0.0822799	10.4675	1.21767e-25	3.27809e-24	DEG
ENSG00000153904.14	DDAH1	protein_coding	19575.3	-1.898	0.0858027	-10.4659	1.23899e-25	3.33054e-24	DEG
ENSG00000120694.15	HSPH1	protein_coding	8622.65	1.94534	0.0908375	10.407	2.30409e-25	6.18446e-24	DEG
ENSG00000146376.6	ARHGAP18	protein_coding	1759.16	-2.25935	0.121153	-10.3947	2.62031e-25	7.02281e-24	DEG
ENSG00000149596.6	JPH2	protein_coding	748.137	-2.86616	0.179626	-10.3892	2.77759e-25	7.43334e-24	DEG
ENSG00000171365.11	CLCN5	protein_coding	1992.35	2.29181	0.124458	10.3795	3.0738e-25	8.2139e-24	DEG
ENSG00000196141.8	SPATS2L	protein_coding	6195.23	-1.90514	0.0873094	-10.367	3.50253e-25	9.34576e-24	DEG
ENSG00000116711.8	PLA2G4A	protein_coding	1496.8	2.36758	0.131942	10.365	3.5765e-25	9.52907e-24	DEG
ENSG00000181104.6	F2R	protein_coding	3978.02	-1.9608	0.0927587	-10.358	3.84869e-25	1.02392e-23	DEG
ENSG00000128342.4	LIF	protein_coding	708.233	3.43659	0.235536	10.3449	4.41459e-25	1.17275e-23	DEG
ENSG00000165795.16	NDRG2	protein_coding	241.022	5.00671	0.38742	10.342	4.5474e-25	1.20626e-23	DEG
ENSG00000138670.12	RASGEF1B	protein_coding	181.545	7.37633	0.616564	10.3417	4.5634e-25	1.20873e-23	DEG
ENSG00000131015.4	ULBP2	protein_coding	1278.15	2.44283	0.139777	10.3224	5.58382e-25	1.47686e-23	DEG
ENSG00000265962.1	RP11-674N23.1	antisense	208.789	-7.00237	0.581573	-10.3209	5.66743e-25	1.49678e-23	DEG
ENSG00000035862.8	TIMP2	protein_coding	14817.1	-1.77916	0.0756572	-10.2985	7.15322e-25	1.88643e-23	DEG
ENSG00000130204.8	TOMM40	protein_coding	10221.8	1.83483	0.0810716	10.2975	7.2332e-25	1.90474e-23	DEG
ENSG00000123329.13	ARHGAP9	protein_coding	200.963	4.98016	0.386885	10.2877	8.00719e-25	2.10549e-23	DEG
ENSG00000124102.4	PI3	protein_coding	255.916	8.03236	0.686759	10.2399	1.31329e-24	3.44829e-23	DEG
ENSG00000148798.5	INA	protein_coding	1270.72	2.55854	0.152616	10.2122	1.74909e-24	4.58591e-23	DEG
ENSG00000026103.15	FAS	protein_coding	3794.62	-1.9471	0.0927902	-10.2069	1.84594e-24	4.83284e-23	DEG
ENSG00000144824.15	PHLDB2	protein_coding	5630.75	-1.88132	0.0864017	-10.2002	1.97772e-24	5.17037e-23	DEG
ENSG00000171055.10	FEZ2	protein_coding	2716.7	-2.18469	0.116307	-10.1859	2.29132e-24	5.98158e-23	DEG
ENSG00000135069.9	PSAT1	protein_coding	1897.67	-2.23951	0.122172	-10.1456	3.46581e-24	9.03458e-23	DEG
ENSG00000133321.6	RARRES3	protein_coding	482.91	-3.46565	0.243272	-10.1354	3.84893e-24	1.00189e-22	DEG
ENSG00000119943.6	PYROXD2	protein_coding	409.388	-4.26781	0.322483	-10.1333	3.93213e-24	1.02207e-22	DEG
ENSG00000111186.8	WNT5B	protein_coding	3438.48	-1.9797	0.096749	-10.1262	4.22612e-24	1.09691e-22	DEG
ENSG00000134352.15	IL6ST	protein_coding	86121.9	-1.67968	0.0671539	-10.1212	4.4476e-24	1.15274e-22	DEG
ENSG00000185432.10	METTL7A	protein_coding	409.616	-4.62189	0.357857	-10.1211	4.45565e-24	1.15318e-22	DEG
ENSG00000101265.11	RASSF2	protein_coding	1679.86	-2.49803	0.148084	-10.1161	4.68806e-24	1.21159e-22	DEG
ENSG00000135046.9	ANXA1	protein_coding	33583.4	-1.70935	0.0703726	-10.0799	6.77915e-24	1.74952e-22	DEG
ENSG00000137868.14	STRA6	protein_coding	1847.05	-2.57487	0.156458	-10.0658	7.82499e-24	2.01655e-22	DEG
ENSG00000241399.2	CD302	protein_coding	1236.87	-2.40707	0.13998	-10.052	9.00495e-24	2.31733e-22	DEG
ENSG00000183421.7	RIPK4	protein_coding	236.442	4.75163	0.373954	10.0323	1.09895e-23	2.82403e-22	DEG
ENSG00000117226.7	GBP3	protein_coding	435.083	-3.58191	0.257415	-10.0302	1.12331e-23	2.88254e-22	DEG
ENSG00000179403.10	VWA1	protein_coding	569.914	3.03851	0.203886	9.99828	1.55069e-23	3.9736e-22	DEG
ENSG00000164619.4	BMPER	protein_coding	364.624	-3.67504	0.26772	-9.99196	1.65287e-23	4.22943e-22	DEG
ENSG00000131409.8	LRRC4B	protein_coding	194.216	5.63373	0.463844	9.98985	1.68845e-23	4.31437e-22	DEG
ENSG00000155254.8	MARVELD1	protein_coding	3785.66	-2.2239	0.122524	-9.98911	1.70103e-23	4.34039e-22	DEG
ENSG00000128422.11	KRT17	protein_coding	550.569	-3.1537	0.215795	-9.98032	1.85869e-23	4.73599e-22	DEG
ENSG00000102934.5	PLLP	protein_coding	206.789	5.45403	0.447051	9.96314	2.20978e-23	5.62267e-22	DEG
ENSG00000155629.10	PIK3AP1	protein_coding	205.537	7.11416	0.614599	9.94821	2.56762e-23	6.524e-22	DEG
ENSG00000176771.11	NCKAP5	protein_coding	337.237	-3.80533	0.282734	-9.92216	3.33465e-23	8.46104e-22	DEG
ENSG00000155511.13	GRIA1	protein_coding	252.252	-5.25502	0.42923	-9.91313	3.65023e-23	9.24878e-22	DEG
ENSG00000163626.12	COX18	protein_coding	992.884	-2.51938	0.153287	-9.91199	3.69219e-23	9.34201e-22	DEG
ENSG00000047849.17	MAP4	protein_coding	12439.5	-1.71699	0.0724022	-9.9029	4.04378e-23	1.02173e-21	DEG
ENSG00000256309.1	AC009469.1	pseudogene	208.63	-7.859	0.694545	-9.87553	5.31497e-23	1.34105e-21	DEG
ENSG00000104689.5	TNFRSF10A	protein_coding	798.276	2.67893	0.170197	9.86459	5.92734e-23	1.49347e-21	DEG
ENSG00000122952.12	ZWINT	protein_coding	2337.16	2.07179	0.108807	9.85036	6.8296e-23	1.71842e-21	DEG
ENSG00000185532.10	PRKG1	protein_coding	3502.64	-1.97337	0.098869	-9.8451	7.19681e-23	1.8083e-21	DEG
ENSG00000139304.8	PTPRQ	protein_coding	245.284	-4.36703	0.342134	-9.84125	7.47736e-23	1.87359e-21	DEG
ENSG00000188763.3	FZD9	protein_coding	437.917	3.46612	0.250588	9.84135	7.46989e-23	1.87359e-21	DEG
ENSG00000112559.9	MDFI	protein_coding	184.123	6.0287	0.511018	9.84055	7.52993e-23	1.88415e-21	DEG
ENSG00000120738.7	EGR1	protein_coding	274.065	-3.98584	0.304269	-9.81316	9.88226e-23	2.46934e-21	DEG
ENSG00000138119.12	MYOF	protein_coding	16709	-1.73341	0.0747553	-9.81075	1.01214e-22	2.52559e-21	DEG
ENSG00000167074.10	TEF	protein_coding	957.77	-2.52731	0.155716	-9.80827	1.03733e-22	2.58489e-21	DEG
ENSG00000179292.4	TMEM151A	protein_coding	198.018	7.0573	0.617733	9.80569	1.06417e-22	2.64812e-21	DEG
ENSG00000170006.7	TMEM154	protein_coding	1732.43	-2.22977	0.125612	-9.7902	1.24045e-22	3.08255e-21	DEG
ENSG00000180190.7	TDRP	protein_coding	1115.74	2.65268	0.1689	9.78498	1.30621e-22	3.24152e-21	DEG
ENSG00000178726.6	THBD	protein_coding	193.893	7.03535	0.617022	9.78141	1.3531e-22	3.35327e-21	DEG
ENSG00000087116.9	ADAMTS2	protein_coding	3593.07	-2.05014	0.107378	-9.77982	1.37453e-22	3.40173e-21	DEG
ENSG00000019991.11	HGF	protein_coding	170.734	-6.47693	0.560342	-9.77426	1.4521e-22	3.5888e-21	DEG
ENSG00000185664.10	PMEL	protein_coding	450.641	3.66533	0.2727	9.77384	1.45818e-22	3.5989e-21	DEG
ENSG00000188211.4	NCR3LG1	protein_coding	1604.34	2.54145	0.157756	9.77111	1.49805e-22	3.69226e-21	DEG
ENSG00000253276.1	CCDC71L	protein_coding	4710.62	-1.87907	0.0900038	-9.76707	1.55893e-22	3.83709e-21	DEG
ENSG00000128604.14	IRF5	protein_coding	189.252	6.53522	0.568078	9.74376	1.96155e-22	4.82153e-21	DEG
ENSG00000005513.9	SOX8	protein_coding	259.188	4.17456	0.325838	9.74278	1.98064e-22	4.86183e-21	DEG
ENSG00000198121.9	LPAR1	protein_coding	5651.36	-1.81714	0.0839378	-9.73502	2.13767e-22	5.24019e-21	DEG
ENSG00000164620.4	RELL2	protein_coding	1538.63	2.32708	0.136393	9.72985	2.24926e-22	5.50628e-21	DEG
ENSG00000164099.3	PRSS12	protein_coding	1303	-2.60514	0.164988	-9.72882	2.27216e-22	5.55483e-21	DEG
ENSG00000183186.6	C2CD4C	protein_coding	301.241	4.2477	0.334036	9.7226	2.41531e-22	5.89681e-21	DEG
ENSG00000119547.5	ONECUT2	protein_coding	195.48	5.52085	0.465033	9.72156	2.44026e-22	5.94969e-21	DEG
ENSG00000124098.9	FAM210B	protein_coding	4108.68	-1.96431	0.0992129	-9.71956	2.48866e-22	6.05953e-21	DEG
ENSG00000162409.6	PRKAA2	protein_coding	1722.01	2.40142	0.1442	9.71853	2.51389e-22	6.11274e-21	DEG
ENSG00000126785.8	RHOJ	protein_coding	1450.68	-2.40575	0.144676	-9.71653	2.56364e-22	6.22533e-21	DEG
ENSG00000184898.6	RBM43	protein_coding	618.883	-2.92773	0.19841	-9.7159	2.57957e-22	6.25563e-21	DEG
ENSG00000178202.8	KDELC2	protein_coding	3828.52	-1.90806	0.0934697	-9.71505	2.60125e-22	6.29977e-21	DEG
ENSG00000131094.3	C1QL1	protein_coding	191.543	5.58793	0.472372	9.71254	2.66606e-22	6.44809e-21	DEG
ENSG00000142552.3	RCN3	protein_coding	5562.51	-1.82787	0.0854716	-9.68586	3.46285e-22	8.364e-21	DEG
ENSG00000170581.9	STAT2	protein_coding	4978.62	-2.01242	0.104541	-9.68445	3.51078e-22	8.46846e-21	DEG
ENSG00000132465.6	IGJ	protein_coding	654.349	-2.81385	0.187339	-9.68218	3.58984e-22	8.64764e-21	DEG
ENSG00000166396.8	SERPINB7	protein_coding	1393.98	-2.62548	0.168253	-9.66092	4.41888e-22	1.06306e-20	DEG
ENSG00000166823.5	MESP1	protein_coding	487.698	3.26743	0.234758	9.65859	4.52034e-22	1.08602e-20	DEG
ENSG00000168502.13	SOGA2	protein_coding	1912.5	-2.36786	0.141701	-9.65315	4.76676e-22	1.14371e-20	DEG
ENSG00000178685.9	PARP10	protein_coding	769.735	-2.90679	0.19754	-9.65264	4.79082e-22	1.14796e-20	DEG
ENSG00000134709.6	HOOK1	protein_coding	178.914	6.26742	0.545943	9.6483	4.99791e-22	1.196e-20	DEG
ENSG00000122870.7	BICC1	protein_coding	5956.48	-1.89126	0.0924081	-9.64486	5.16841e-22	1.23516e-20	DEG
ENSG00000168016.9	TRANK1	protein_coding	605.961	-2.88357	0.195465	-9.63637	5.614e-22	1.33988e-20	DEG
ENSG00000143195.8	ILDR2	protein_coding	161.778	6.76522	0.598429	9.63392	5.74949e-22	1.37041e-20	DEG
ENSG00000105173.9	CCNE1	protein_coding	1380.85	2.48102	0.153762	9.63192	5.86238e-22	1.39548e-20	DEG
ENSG00000138448.7	ITGAV	protein_coding	23737.2	-1.91841	0.0953733	-9.62963	5.99475e-22	1.42511e-20	DEG
ENSG00000176971.2	FIBIN	protein_coding	465.251	-3.40727	0.250111	-9.6248	6.28276e-22	1.49162e-20	DEG
ENSG00000180776.11	ZDHHC20	protein_coding	2953.15	-2.05342	0.109467	-9.6231	6.38768e-22	1.51454e-20	DEG
ENSG00000167536.9	DHRS13	protein_coding	662.264	2.79206	0.186253	9.62165	6.47831e-22	1.53402e-20	DEG
ENSG00000135127.7	CCDC64	protein_coding	171.215	6.53224	0.575468	9.61345	7.01573e-22	1.6591e-20	DEG
ENSG00000269728.1	RP11-145M9.4	lincRNA	1351.23	-2.45595	0.151741	-9.59497	8.39432e-22	1.98253e-20	DEG
ENSG00000147231.9	CXorf57	protein_coding	192.684	5.01547	0.418507	9.59475	8.41201e-22	1.98412e-20	DEG
ENSG00000113657.8	DPYSL3	protein_coding	3743.32	-2.08402	0.113232	-9.57345	1.03394e-21	2.43554e-20	DEG
ENSG00000139438.5	FAM222A	protein_coding	332.111	3.85026	0.297965	9.56573	1.11407e-21	2.6209e-20	DEG
ENSG00000198948.7	MFAP3L	protein_coding	672.586	3.21908	0.232092	9.56119	1.16415e-21	2.73516e-20	DEG
ENSG00000110031.8	LPXN	protein_coding	2264.13	-2.29219	0.135315	-9.54952	1.30299e-21	3.05737e-20	DEG
ENSG00000181284.2	TMEM102	protein_coding	575.028	3.18464	0.229044	9.53809	1.45486e-21	3.40931e-20	DEG
ENSG00000122176.10	FMOD	protein_coding	3760.17	-1.94263	0.0988536	-9.53562	1.48995e-21	3.48702e-20	DEG
ENSG00000184575.7	XPOT	protein_coding	21915.8	-1.66215	0.0695451	-9.52112	1.71322e-21	4.00439e-20	DEG
ENSG00000006432.11	MAP3K9	protein_coding	454.699	3.97215	0.312275	9.51774	1.76993e-21	4.13158e-20	DEG
ENSG00000109861.11	CTSC	protein_coding	10688.1	-1.7111	0.0747589	-9.51197	1.87091e-21	4.36168e-20	DEG
ENSG00000153714.5	LURAP1L	protein_coding	1031.94	-3.07341	0.218129	-9.50542	1.99249e-21	4.63915e-20	DEG
ENSG00000184160.6	ADRA2C	protein_coding	262.668	4.11219	0.327461	9.50398	2.02016e-21	4.69752e-20	DEG
ENSG00000048052.17	HDAC9	protein_coding	1746.15	2.16046	0.12242	9.47935	2.55865e-21	5.94204e-20	DEG
ENSG00000154175.12	ABI3BP	protein_coding	466.532	-3.20738	0.232908	-9.47747	2.60511e-21	6.04219e-20	DEG
ENSG00000144455.9	SUMF1	protein_coding	2349.11	-2.02281	0.108003	-9.47013	2.79484e-21	6.47394e-20	DEG
ENSG00000128683.9	GAD1	protein_coding	131.126	6.61787	0.595036	9.44123	3.68441e-21	8.52361e-20	DEG
ENSG00000169507.5	SLC38A11	protein_coding	1307.49	-5.69336	0.497186	-9.43985	3.73316e-21	8.62536e-20	DEG
ENSG00000174564.8	IL20RB	protein_coding	268.328	-3.87988	0.305184	-9.43652	3.8535e-21	8.89204e-20	DEG
ENSG00000124302.8	CHST8	protein_coding	166.444	6.37959	0.570118	9.43593	3.87549e-21	8.9314e-20	DEG
ENSG00000168003.12	SLC3A2	protein_coding	41477.8	1.6884	0.0730427	9.42463	4.31616e-21	9.93431e-20	DEG
ENSG00000180730.4	SHISA2	protein_coding	217.53	4.50678	0.372336	9.41831	4.58423e-21	1.05379e-19	DEG
ENSG00000132274.11	TRIM22	protein_coding	5991.75	-4.4946	0.371466	-9.40759	5.0765e-21	1.16547e-19	DEG
ENSG00000133794.13	ARNTL	protein_coding	1199.72	2.5667	0.166723	9.397	5.61405e-21	1.28725e-19	DEG
ENSG00000134215.11	VAV3	protein_coding	345.856	3.55113	0.271876	9.38343	6.38625e-21	1.46245e-19	DEG
ENSG00000204642.9	HLA-F	protein_coding	4429.71	1.9081	0.0968741	9.37402	6.98205e-21	1.59687e-19	DEG
ENSG00000270149.1	F11R	protein_coding	186.164	7.59209	0.704664	9.35493	8.36515e-21	1.91078e-19	DEG
ENSG00000137259.2	HIST1H2AB	protein_coding	1814.02	-2.45494	0.155568	-9.35242	8.56654e-21	1.95432e-19	DEG
ENSG00000068489.8	PRR11	protein_coding	1063.56	-2.39956	0.149983	-9.33144	1.04447e-20	2.37978e-19	DEG
ENSG00000158457.4	TSPAN33	protein_coding	223.909	4.70041	0.396743	9.32698	1.0893e-20	2.47882e-19	DEG
ENSG00000105327.11	BBC3	protein_coding	1106.26	-2.46491	0.157184	-9.31969	1.16682e-20	2.65189e-19	DEG
ENSG00000185269.7	NOTUM	protein_coding	164.006	6.40486	0.580781	9.30619	1.32496e-20	3.00752e-19	DEG
ENSG00000136044.7	APPL2	protein_coding	4591.15	-1.89969	0.0966963	-9.30431	1.34869e-20	3.05753e-19	DEG
ENSG00000095752.2	IL11	protein_coding	1290.47	2.27482	0.137145	9.29545	1.4658e-20	3.31886e-19	DEG
ENSG00000170989.8	S1PR1	protein_coding	714.754	2.75373	0.188814	9.28815	1.57001e-20	3.55037e-19	DEG
ENSG00000177694.10	NAALADL2	protein_coding	592.726	-3.14865	0.232028	-9.2603	2.03862e-20	4.60434e-19	DEG
ENSG00000118473.17	SGIP1	protein_coding	624.083	-2.82534	0.19722	-9.25532	2.13591e-20	4.81805e-19	DEG
ENSG00000168679.13	SLC16A4	protein_coding	2851.88	-1.97852	0.10573	-9.25485	2.14535e-20	4.83331e-19	DEG
ENSG00000135114.8	OASL	protein_coding	177.485	5.34727	0.470574	9.23825	2.50571e-20	5.63816e-19	DEG
ENSG00000105048.12	TNNT1	protein_coding	451.39	3.40207	0.260179	9.23237	2.64699e-20	5.94866e-19	DEG
ENSG00000179913.6	B3GNT3	protein_coding	179.291	7.53303	0.707671	9.23173	2.663e-20	5.9772e-19	DEG
ENSG00000131668.9	BARX1	protein_coding	171.766	6.32348	0.576703	9.2309	2.68374e-20	6.01631e-19	DEG
ENSG00000133863.2	TEX15	protein_coding	1737.12	2.2987	0.14095	9.2139	3.14476e-20	7.04106e-19	DEG
ENSG00000235513.1	RP4-756G23.5	antisense	137.823	-6.03262	0.546379	-9.21085	3.23552e-20	7.23533e-19	DEG
ENSG00000101310.10	SEC23B	protein_coding	2667.57	1.96346	0.104632	9.20813	3.31842e-20	7.41154e-19	DEG
ENSG00000175591.7	P2RY2	protein_coding	167.485	7.09646	0.662656	9.20004	3.57827e-20	7.98205e-19	DEG
ENSG00000127083.7	OMD	protein_coding	162.792	-7.51754	0.708515	-9.19887	3.61738e-20	8.05935e-19	DEG
ENSG00000184384.9	MAML2	protein_coding	1817.92	-2.10468	0.12009	-9.19872	3.62225e-20	8.06028e-19	DEG
ENSG00000175084.7	DES	protein_coding	678.647	2.73158	0.188565	9.18291	4.19596e-20	9.32545e-19	DEG
ENSG00000205413.3	SAMD9	protein_coding	6093.48	-1.75685	0.0824254	-9.18225	4.22194e-20	9.37167e-19	DEG
ENSG00000166592.7	RRAD	protein_coding	518.273	3.34449	0.255855	9.16333	5.03185e-20	1.11558e-18	DEG
ENSG00000115232.9	ITGA4	protein_coding	2941.53	-2.18213	0.129098	-9.15682	5.34494e-20	1.18267e-18	DEG
ENSG00000197712.7	FAM114A1	protein_coding	10272.7	-1.8173	0.0892568	-9.15677	5.34754e-20	1.18267e-18	DEG
ENSG00000114779.15	ABHD14B	protein_coding	1701.36	-2.14871	0.125484	-9.15426	5.473e-20	1.20894e-18	DEG
ENSG00000169047.5	IRS1	protein_coding	1501.8	-2.18978	0.13	-9.1522	5.57853e-20	1.23075e-18	DEG
ENSG00000243509.4	TNFRSF6B	protein_coding	160.922	-7.49508	0.709962	-9.14849	5.77351e-20	1.27221e-18	DEG
ENSG00000070159.9	PTPN3	protein_coding	881.104	2.63881	0.179213	9.14449	5.99125e-20	1.31858e-18	DEG
ENSG00000150093.14	ITGB1	protein_coding	21602.6	-2.09346	0.119635	-9.13997	6.24701e-20	1.3732e-18	DEG
ENSG00000272599.1	RP11-152N13.16	antisense	303.591	3.78231	0.305135	9.11828	7.63275e-20	1.67578e-18	DEG
ENSG00000213722.4	DDAH2	protein_coding	665.629	-2.66647	0.182908	-9.11102	8.16143e-20	1.78968e-18	DEG
ENSG00000004776.7	HSPB6	protein_coding	223.011	-4.09979	0.340411	-9.10602	8.54574e-20	1.86942e-18	DEG
ENSG00000141384.7	TAF4B	protein_coding	1355.51	2.80793	0.198542	9.10606	8.54275e-20	1.86942e-18	DEG
ENSG00000141756.14	FKBP10	protein_coding	24580.4	-1.66757	0.0736049	-9.0697	1.19344e-19	2.60755e-18	DEG
ENSG00000159212.8	CLIC6	protein_coding	161.732	5.35388	0.480403	9.06298	1.26939e-19	2.77015e-18	DEG
ENSG00000183655.11	KLHL25	protein_coding	1482.53	2.27204	0.140419	9.05892	1.31754e-19	2.87175e-18	DEG
ENSG00000169291.5	SHE	protein_coding	149.764	6.28225	0.583339	9.0552	1.36316e-19	2.96761e-18	DEG
ENSG00000162512.11	SDC3	protein_coding	4998.35	-1.96528	0.106609	-9.05441	1.37307e-19	2.9856e-18	DEG
ENSG00000147180.12	ZNF711	protein_coding	177.588	5.94804	0.546554	9.05316	1.38886e-19	3.01631e-18	DEG
ENSG00000171126.7	KCNG3	protein_coding	158.81	6.48771	0.606293	9.05125	1.41346e-19	3.06606e-18	DEG
ENSG00000144381.12	HSPD1	protein_coding	22442.9	1.61555	0.0680841	9.04095	1.55315e-19	3.36504e-18	DEG
ENSG00000188483.6	IER5L	protein_coding	3422.28	-1.91624	0.101371	-9.03849	1.58854e-19	3.43759e-18	DEG
ENSG00000150593.11	PDCD4	protein_coding	572.778	-2.89839	0.210649	-9.01211	2.02123e-19	4.36871e-18	DEG
ENSG00000116661.9	FBXO2	protein_coding	707.345	2.8424	0.20445	9.01149	2.03267e-19	4.38818e-18	DEG
ENSG00000129103.13	SUMF2	protein_coding	9555.14	-1.7346	0.0815371	-9.00944	2.07118e-19	4.46599e-18	DEG
ENSG00000106723.12	SPIN1	protein_coding	9968.37	-1.73568	0.0816689	-9.00808	2.09694e-19	4.51615e-18	DEG
ENSG00000229124.2	VIM-AS1	antisense	2565.74	-2.45328	0.161385	-9.00504	2.15593e-19	4.63768e-18	DEG
ENSG00000162545.5	CAMK2N1	protein_coding	3461.83	-1.91633	0.101769	-9.00404	2.17562e-19	4.67448e-18	DEG
ENSG00000150540.9	HNMT	protein_coding	785.568	-3.43253	0.270594	-8.98957	2.48198e-19	5.3264e-18	DEG
ENSG00000203727.3	SAMD5	protein_coding	527.485	-3.16038	0.240373	-8.98762	2.5264e-19	5.4153e-18	DEG
ENSG00000179954.10	SSC5D	protein_coding	655.218	-3.21061	0.24599	-8.98658	2.55041e-19	5.46029e-18	DEG
ENSG00000187790.6	FANCM	protein_coding	2868.98	2.01031	0.112436	8.98567	2.57151e-19	5.49896e-18	DEG
UL120	UL120	CMV	159.618	7.39183	0.712141	8.97551	2.82046e-19	6.02419e-18	DEG
ENSG00000173110.6	HSPA6	protein_coding	185.807	5.06985	0.453816	8.96807	3.01754e-19	6.43753e-18	DEG
ENSG00000138798.7	EGF	protein_coding	134.743	-5.34146	0.484126	-8.96762	3.02989e-19	6.45628e-18	DEG
ENSG00000182667.10	NTM	protein_coding	479.148	-3.29323	0.255936	-8.96018	3.24153e-19	6.89911e-18	DEG
ENSG00000145349.12	CAMK2D	protein_coding	7282.63	-1.75912	0.0847693	-8.95515	3.39274e-19	7.21246e-18	DEG
ENSG00000163590.9	PPM1L	protein_coding	536.202	3.34282	0.261713	8.95184	3.496e-19	7.42325e-18	DEG
ENSG00000221869.4	CEBPD	protein_coding	2115.05	-2.16322	0.129987	-8.94875	3.59515e-19	7.62484e-18	DEG
ENSG00000133878.4	DUSP26	protein_coding	153.201	5.99142	0.557937	8.9462	3.67915e-19	7.79385e-18	DEG
ENSG00000121743.3	GJA3	protein_coding	184.7	4.69235	0.413045	8.93934	3.91515e-19	8.28409e-18	DEG
ENSG00000138347.11	MYPN	protein_coding	393.099	-3.52944	0.283006	-8.93777	3.97104e-19	8.39253e-18	DEG
ENSG00000172375.8	C2CD2L	protein_coding	1303.52	2.26703	0.141782	8.93648	4.01769e-19	8.48122e-18	DEG
ENSG00000117595.6	IRF6	protein_coding	295.912	4.49524	0.391521	8.92734	4.36393e-19	9.20139e-18	DEG
ENSG00000088756.8	ARHGAP28	protein_coding	911.057	-2.47595	0.165536	-8.91614	4.82812e-19	1.01683e-17	DEG
ENSG00000188910.7	GJB3	protein_coding	153.427	5.98475	0.559273	8.91292	4.97039e-19	1.04557e-17	DEG
ENSG00000133101.5	CCNA1	protein_coding	243.237	4.19456	0.358765	8.90432	5.37135e-19	1.12861e-17	DEG
ENSG00000140557.7	ST8SIA2	protein_coding	154.459	7.34037	0.714801	8.87012	7.30665e-19	1.53346e-17	DEG
ENSG00000156113.16	KCNMA1	protein_coding	1818.3	-2.15827	0.130594	-8.86921	7.36638e-19	1.54421e-17	DEG
ENSG00000104213.8	PDGFRL	protein_coding	381.629	-3.30219	0.259713	-8.86435	7.69489e-19	1.61121e-17	DEG
ENSG00000142700.7	DMRTA2	protein_coding	151.238	6.62466	0.634882	8.85938	8.04592e-19	1.68276e-17	DEG
ENSG00000075624.9	ACTB	protein_coding	66083.6	-1.56352	0.063677	-8.84965	8.77977e-19	1.83412e-17	DEG
ENSG00000163171.6	CDC42EP3	protein_coding	1190.44	-2.35753	0.154103	-8.80923	1.26012e-18	2.62939e-17	DEG
ENSG00000258818.2	RNASE4	protein_coding	1421.17	-2.25266	0.142252	-8.80593	1.29776e-18	2.70481e-17	DEG
ENSG00000198794.7	SCAMP5	protein_coding	436.917	3.10442	0.239007	8.80486	1.31014e-18	2.72748e-17	DEG
ENSG00000168140.4	VASN	protein_coding	3480.27	-2.05138	0.119554	-8.79421	1.44056e-18	2.99554e-17	DEG
ENSG00000203618.5	GP1BB	protein_coding	148.184	7.28818	0.71665	8.77441	1.71798e-18	3.5683e-17	DEG
ENSG00000081923.6	ATP8B1	protein_coding	6038.02	-1.91791	0.104813	-8.75757	1.99508e-18	4.1391e-17	DEG
ENSG00000179294.5	C17orf96	protein_coding	255.161	4.72376	0.425359	8.7544	2.05199e-18	4.25229e-17	DEG
ENSG00000091622.11	PITPNM3	protein_coding	324.565	3.37776	0.271712	8.75103	2.11411e-18	4.376e-17	DEG
ENSG00000138821.8	SLC39A8	protein_coding	5481.27	1.7628	0.0871719	8.75049	2.1243e-18	4.39209e-17	DEG
ENSG00000144583.4	MARCH4	protein_coding	680.667	-3.10798	0.241121	-8.74239	2.28233e-18	4.71343e-17	DEG
ENSG00000223485.1	RP11-417E7.1	lincRNA	311.808	-3.56657	0.294153	-8.72529	2.655e-18	5.47681e-17	DEG
ENSG00000164237.4	CMBL	protein_coding	882.14	-2.6207	0.185945	-8.71606	2.88058e-18	5.93537e-17	DEG
ENSG00000189129.9	PLAC9	protein_coding	818.997	-2.65379	0.189977	-8.7052	3.1702e-18	6.52469e-17	DEG
ENSG00000149948.9	HMGA2	protein_coding	728.096	-2.94383	0.223392	-8.70145	3.27656e-18	6.73594e-17	DEG
ENSG00000108797.7	CNTNAP1	protein_coding	1288.63	-2.30461	0.150032	-8.69554	3.45187e-18	7.08829e-17	DEG
ENSG00000144015.4	TRIM43	protein_coding	138.937	6.84627	0.674484	8.66777	4.40664e-18	9.0386e-17	DEG
ENSG00000211445.7	GPX3	protein_coding	297.994	3.67507	0.309018	8.65669	4.85671e-18	9.95048e-17	DEG
ENSG00000117586.6	TNFSF4	protein_coding	194.251	-4.32843	0.384557	-8.65525	4.91837e-18	1.00654e-16	DEG
ENSG00000091651.4	ORC6	protein_coding	1799.2	2.03704	0.119873	8.65114	5.0986e-18	1.04225e-16	DEG
ENSG00000135378.3	PRRG4	protein_coding	146.317	5.30934	0.498492	8.64476	5.39165e-18	1.10091e-16	DEG
ENSG00000156508.13	EEF1A1	protein_coding	828725	-1.5283	0.0611476	-8.63982	5.63007e-18	1.14829e-16	DEG
ENSG00000197106.6	SLC6A17	protein_coding	204.115	4.21287	0.372645	8.62178	6.59219e-18	1.34301e-16	DEG
ENSG00000133107.10	TRPC4	protein_coding	715.497	-2.5913	0.184573	-8.62153	6.60649e-18	1.34441e-16	DEG
ENSG00000011426.6	ANLN	protein_coding	9608.55	-1.73631	0.0854142	-8.62044	6.66997e-18	1.3558e-16	DEG
ENSG00000184012.7	TMPRSS2	protein_coding	139.151	7.20201	0.720329	8.60997	7.30805e-18	1.48384e-16	DEG
ENSG00000146859.6	TMEM140	protein_coding	552.48	-2.83925	0.214622	-8.56972	1.03734e-17	2.10388e-16	DEG
ENSG00000135750.10	KCNK1	protein_coding	998.128	2.33241	0.155527	8.56706	1.06162e-17	2.15071e-16	DEG
UL137	UL137	CMV	137.706	7.18177	0.721648	8.56618	1.06978e-17	2.16481e-16	DEG
UL148A	UL148A	CMV	137.101	7.17837	0.721593	8.56213	1.10805e-17	2.23974e-16	DEG
ENSG00000158528.7	PPP1R9A	protein_coding	731.909	2.96208	0.229201	8.56054	1.12344e-17	2.26832e-16	DEG
ENSG00000143476.13	DTL	protein_coding	4055.56	2.10689	0.129433	8.55184	1.21142e-17	2.44324e-16	DEG
ENSG00000232855.2	AF131217.1	lincRNA	124.662	-6.25585	0.615925	-8.53325	1.42289e-17	2.86655e-16	DEG
ENSG00000122641.9	INHBA	protein_coding	997.61	-2.32254	0.155076	-8.5283	1.48512e-17	2.98858e-16	DEG
ENSG00000187094.7	CCK	protein_coding	131.541	6.47327	0.642951	8.51273	1.69878e-17	3.41475e-16	DEG
ENSG00000100968.9	NFATC4	protein_coding	5392	-1.77375	0.0910079	-8.50201	1.86337e-17	3.74142e-16	DEG
RL1	RL1	CMV	135.335	7.14895	0.723739	8.49609	1.96082e-17	3.93274e-16	DEG
ENSG00000131941.3	RHPN2	protein_coding	715.924	2.61755	0.190565	8.48817	2.09925e-17	4.2057e-16	DEG
ENSG00000149571.6	KIRREL3	protein_coding	550.972	-3.44696	0.288451	-8.48311	2.19258e-17	4.38783e-16	DEG
ENSG00000120129.5	DUSP1	protein_coding	4155.88	-1.88204	0.104056	-8.4766	2.31871e-17	4.63512e-16	DEG
ENSG00000089157.11	RPLP0	protein_coding	144612	-1.58319	0.0688143	-8.47477	2.35542e-17	4.70329e-16	DEG
ENSG00000170837.2	GPR27	protein_coding	130.078	6.45157	0.64347	8.47214	2.4093e-17	4.80559e-16	DEG
ENSG00000232274.2	RP11-782C8.2	lincRNA	89.8951	-6.58537	0.659717	-8.46631	2.53284e-17	5.04642e-16	DEG
ENSG00000180573.8	HIST1H2AC	protein_coding	12241.7	-1.81391	0.0962283	-8.45811	2.71735e-17	5.4081e-16	DEG
ENSG00000198300.8	PEG3	protein_coding	132.277	6.78017	0.684502	8.44434	3.05758e-17	6.07854e-16	DEG
ENSG00000118515.7	SGK1	protein_coding	4121.93	-2.07294	0.127117	-8.44063	3.15639e-17	6.26808e-16	DEG
ENSG00000180875.4	GREM2	protein_coding	172.476	-4.53328	0.419261	-8.4274	3.53421e-17	7.01068e-16	DEG
ENSG00000172061.7	LRRC15	protein_coding	413.228	-2.96437	0.233335	-8.41866	3.80826e-17	7.54603e-16	DEG
ENSG00000113448.12	PDE4D	protein_coding	2564.71	1.99207	0.1179	8.41448	3.94639e-17	7.81117e-16	DEG
ENSG00000082438.11	COBLL1	protein_coding	2542.91	-1.95641	0.113666	-8.41417	3.95671e-17	7.82304e-16	DEG
UL3	UL3	CMV	129.774	7.10029	0.725168	8.41225	4.0223e-17	7.94405e-16	DEG
ENSG00000187764.7	SEMA4D	protein_coding	427.863	3.07817	0.247079	8.41097	4.06631e-17	8.0222e-16	DEG
ENSG00000141574.3	SECTM1	protein_coding	3022.47	-2.2105	0.14399	-8.40679	4.21377e-17	8.30406e-16	DEG
ENSG00000160469.12	BRSK1	protein_coding	1248.24	2.32229	0.157699	8.38494	5.07519e-17	9.99079e-16	DEG
ENSG00000107954.6	NEURL	protein_coding	323.126	3.34428	0.27976	8.37962	5.30969e-17	1.0441e-15	DEG
ENSG00000112118.13	MCM3	protein_coding	11508.9	1.69264	0.0826816	8.37718	5.42086e-17	1.06365e-15	DEG
ENSG00000119616.7	FCF1	protein_coding	1888.23	-2.17804	0.140624	-8.37724	5.4181e-17	1.06365e-15	DEG
ENSG00000134294.9	SLC38A2	protein_coding	43469.1	-1.56394	0.0674534	-8.36045	6.24814e-17	1.22465e-15	DEG
ENSG00000213694.3	S1PR3	protein_coding	8777.39	-1.65821	0.078753	-8.35786	6.38666e-17	1.25044e-15	DEG
ENSG00000144868.9	TMEM108	protein_coding	129.964	7.08057	0.72756	8.35748	6.40733e-17	1.25314e-15	DEG
ENSG00000163536.8	SERPINI1	protein_coding	355.829	3.11595	0.253276	8.35432	6.5811e-17	1.28573e-15	DEG
UL142	UL142	CMV	128.839	7.07485	0.727437	8.35103	6.76723e-17	1.32067e-15	DEG
ENSG00000140403.8	DNAJA4	protein_coding	334.639	3.6527	0.317824	8.34646	7.03376e-17	1.3712e-15	DEG
ENSG00000136546.9	SCN7A	protein_coding	133.229	-4.81828	0.457766	-8.3411	7.3604e-17	1.43334e-15	DEG
ENSG00000049246.10	PER3	protein_coding	641.569	-2.63411	0.196206	-8.32852	8.1859e-17	1.59238e-15	DEG
ENSG00000169594.8	BNC1	protein_coding	468.817	2.89632	0.227732	8.32702	8.29056e-17	1.611e-15	DEG
ENSG00000141441.11	GAREM	protein_coding	250.333	3.68988	0.323148	8.32398	8.50554e-17	1.65101e-15	DEG
ENSG00000253293.3	HOXA10	protein_coding	2854.6	-1.86783	0.104331	-8.31805	8.94228e-17	1.73392e-15	DEG
ENSG00000176974.13	SHMT1	protein_coding	1212.06	2.26147	0.151668	8.31732	8.99732e-17	1.74272e-15	DEG
truncated_UL141	truncated UL141	CMV	126.546	7.05168	0.728324	8.30906	9.64649e-17	1.86647e-15	DEG
ENSG00000144668.7	ITGA9	protein_coding	116.693	5.25283	0.51236	8.30047	1.03702e-16	2.00436e-15	DEG
ENSG00000143355.11	LHX9	protein_coding	434.194	-2.97794	0.238463	-8.29456	1.0899e-16	2.10431e-15	DEG
ENSG00000118985.10	ELL2	protein_coding	4275.05	-1.81443	0.098201	-8.29355	1.0992e-16	2.12e-15	DEG
ENSG00000104205.8	SGK3	protein_coding	1545.17	2.04996	0.126721	8.28561	1.1751e-16	2.26398e-15	DEG
ENSG00000180660.6	MAB21L1	protein_coding	351.573	-3.25144	0.271822	-8.28277	1.2034e-16	2.31603e-15	DEG
ENSG00000221852.4	KRTAP1-5	protein_coding	141.602	-4.80869	0.460764	-8.26604	1.38481e-16	2.66233e-15	DEG
ENSG00000244270.1	RPL32P29	pseudogene	114.341	-7.02502	0.730057	-8.2528	1.54722e-16	2.97142e-15	DEG
ENSG00000114631.10	PODXL2	protein_coding	700.158	2.51593	0.183762	8.24942	1.59172e-16	3.05363e-15	DEG
ENSG00000170421.7	KRT8	protein_coding	3119.31	-1.9075	0.110323	-8.22589	1.9374e-16	3.71287e-15	DEG
ENSG00000160588.5	MPZL3	protein_coding	124.051	5.75372	0.578014	8.22422	1.96459e-16	3.76099e-15	DEG
ENSG00000110427.10	KIAA1549L	protein_coding	1665.54	-2.49183	0.181528	-8.21818	2.06608e-16	3.95111e-15	DEG
RL10	RL10	CMV	123.245	7.00488	0.731144	8.21298	2.15764e-16	4.12184e-15	DEG
ENSG00000164684.9	ZNF704	protein_coding	298.904	3.55183	0.310736	8.21222	2.17133e-16	4.14362e-15	DEG
ENSG00000141655.11	TNFRSF11A	protein_coding	127.783	6.30837	0.648065	8.1911	2.5884e-16	4.93432e-15	DEG
ENSG00000198860.7	TSEN15	protein_coding	3021.88	-1.85263	0.104212	-8.18164	2.80003e-16	5.33214e-15	DEG
ENSG00000123358.15	NR4A1	protein_coding	585.156	2.75238	0.214283	8.17786	2.88937e-16	5.49649e-15	DEG
UL121	UL121	CMV	118.228	6.97351	0.730639	8.17574	2.94055e-16	5.58798e-15	DEG
ENSG00000236886.2	AC007563.5	antisense	145.637	-5.52292	0.553636	-8.16949	3.09689e-16	5.8789e-15	DEG
ENSG00000100297.11	MCM5	protein_coding	6437.98	1.67858	0.0830708	8.1687	3.11736e-16	5.91155e-15	DEG
ENSG00000121966.6	CXCR4	protein_coding	117.154	6.30309	0.650132	8.15693	3.43641e-16	6.50975e-15	DEG
ENSG00000216490.3	IFI30	protein_coding	1129.72	2.33321	0.163504	8.15401	3.52064e-16	6.66233e-15	DEG
ENSG00000111452.8	GPR133	protein_coding	1451.8	-2.24266	0.152446	-8.15146	3.59549e-16	6.79687e-15	DEG
ENSG00000144655.10	CSRNP1	protein_coding	2420.63	1.91856	0.11271	8.14971	3.64791e-16	6.88876e-15	DEG
ENSG00000167642.8	SPINT2	protein_coding	2225.57	2.07391	0.131776	8.14952	3.6536e-16	6.89232e-15	DEG
ENSG00000170786.8	SDR16C5	protein_coding	116.996	6.95888	0.731302	8.14831	3.6906e-16	6.95487e-15	DEG
ENSG00000102879.11	CORO1A	protein_coding	385.066	2.96733	0.241527	8.1454	3.78045e-16	7.11676e-15	DEG
ENSG00000156966.6	B3GNT7	protein_coding	125.754	5.57401	0.561935	8.13975	3.96092e-16	7.44876e-15	DEG
ENSG00000123384.9	LRP1	protein_coding	12976.1	-1.96329	0.118737	-8.11275	4.94875e-16	9.29675e-15	DEG
ENSG00000164695.4	CHMP4C	protein_coding	115.314	6.57395	0.687314	8.10976	5.07203e-16	9.51848e-15	DEG
ENSG00000113739.6	STC2	protein_coding	1936.77	-2.24787	0.154198	-8.09262	5.8393e-16	1.0947e-14	DEG
ENSG00000119915.4	ELOVL3	protein_coding	125.958	5.19713	0.518648	8.09244	5.84823e-16	1.09524e-14	DEG
ENSG00000184619.3	KRBA2	protein_coding	227.693	-3.66947	0.330578	-8.07517	6.7384e-16	1.26064e-14	DEG
ENSG00000168913.6	ENHO	protein_coding	179.407	4.13308	0.388217	8.07042	7.00561e-16	1.30928e-14	DEG
ENSG00000166165.8	CKB	protein_coding	1018.63	2.37485	0.17082	8.04852	8.38013e-16	1.56455e-14	DEG
ENSG00000072071.12	LPHN1	protein_coding	473.792	2.82795	0.227865	8.02207	1.03981e-15	1.9393e-14	DEG
ENSG00000115252.14	PDE1A	protein_coding	138.743	-5.00777	0.499823	-8.01838	1.07148e-15	1.9963e-14	DEG
ENSG00000171889.3	MIR31HG	sense_overlapping	319.896	-3.22851	0.278722	-7.99546	1.29093e-15	2.40271e-14	DEG
ENSG00000120952.4	PRAMEF2	protein_coding	113.124	6.88037	0.737095	7.97776	1.49013e-15	2.7706e-14	DEG
ENSG00000167550.6	RHEBL1	protein_coding	350.039	3.05739	0.257932	7.97646	1.50587e-15	2.79699e-14	DEG
ENSG00000107738.15	C10orf54	protein_coding	4115.45	-1.75445	0.0946339	-7.97235	1.55682e-15	2.88867e-14	DEG
ENSG00000198944.4	SOWAHA	protein_coding	133.965	5.34239	0.545251	7.96402	1.66542e-15	3.087e-14	DEG
ENSG00000140945.11	CDH13	protein_coding	4544.05	-1.98834	0.124443	-7.94208	1.9882e-15	3.68152e-14	DEG
ENSG00000078018.15	MAP2	protein_coding	618.828	-2.54271	0.194471	-7.93285	2.14173e-15	3.96176e-14	DEG
ENSG00000144285.11	SCN1A	protein_coding	152.295	-4.85726	0.486473	-7.92904	2.20852e-15	4.08115e-14	DEG
ENSG00000101425.8	BPI	protein_coding	86.4031	-5.65788	0.587731	-7.9252	2.27774e-15	4.20476e-14	DEG
ENSG00000080573.6	COL5A3	protein_coding	5646.16	-1.7755	0.0979019	-7.92122	2.35191e-15	4.33725e-14	DEG
ENSG00000183647.6	ZNF530	protein_coding	679.16	2.42102	0.179403	7.92084	2.35916e-15	4.34557e-14	DEG
ENSG00000196632.6	WNK3	protein_coding	620.504	3.03062	0.256368	7.92073	2.36123e-15	4.34557e-14	DEG
ENSG00000176826.11	FKBP9L	pseudogene	106.478	-5.53555	0.572677	-7.91992	2.37663e-15	4.36947e-14	DEG
ENSG00000180532.6	ZSCAN4	protein_coding	113.801	5.79928	0.606823	7.90886	2.59754e-15	4.77078e-14	DEG
ENSG00000154856.8	APCDD1	protein_coding	1684.93	-2.06103	0.134242	-7.90385	2.70419e-15	4.96161e-14	DEG
ENSG00000147874.6	HAUS6	protein_coding	5345.18	1.68663	0.0869834	7.89381	2.93103e-15	5.37237e-14	DEG
ENSG00000136514.2	RTP4	protein_coding	415.2	-2.88028	0.238322	-7.88968	3.0297e-15	5.54759e-14	DEG
ENSG00000163083.5	INHBB	protein_coding	136.699	4.96999	0.504303	7.87224	3.48338e-15	6.37187e-14	DEG
ENSG00000143416.16	SELENBP1	protein_coding	1130.59	-2.12531	0.143054	-7.86638	3.65061e-15	6.67103e-14	DEG
ENSG00000149418.6	ST14	protein_coding	115.411	5.7806	0.607903	7.86408	3.71827e-15	6.78781e-14	DEG
ENSG00000187240.9	DYNC2H1	protein_coding	2616.02	-2.03308	0.131382	-7.86313	3.74656e-15	6.83257e-14	DEG
ENSG00000147853.12	AK3	protein_coding	4840.19	-1.75883	0.096508	-7.86289	3.75361e-15	6.83852e-14	DEG
ENSG00000135218.13	CD36	protein_coding	169.988	-3.95482	0.375886	-7.86096	3.81215e-15	6.9382e-14	DEG
ENSG00000267194.1	RP1-193H18.2	lincRNA	122.134	-5.32521	0.550792	-7.85272	4.07126e-15	7.40233e-14	DEG
ENSG00000122378.9	FAM213A	protein_coding	895.248	2.25093	0.159327	7.85134	4.1161e-15	7.47635e-14	DEG
ENSG00000163935.9	SFMBT1	protein_coding	1485.95	2.184	0.150812	7.85083	4.13309e-15	7.49968e-14	DEG
ENSG00000196159.7	FAT4	protein_coding	3601.59	-2.00665	0.128305	-7.84572	4.30462e-15	7.8031e-14	DEG
ENSG00000162772.12	ATF3	protein_coding	386.103	2.9471	0.248181	7.84547	4.3135e-15	7.81136e-14	DEG
ENSG00000133069.10	TMCC2	protein_coding	898.823	2.31231	0.167436	7.83767	4.58989e-15	8.30357e-14	DEG
ENSG00000108001.9	EBF3	protein_coding	283.074	3.83002	0.3611	7.83723	4.60594e-15	8.32428e-14	DEG
ENSG00000249669.3	MIR143HG	lincRNA	198.872	-4.04335	0.388627	-7.83104	4.83867e-15	8.73616e-14	DEG
ENSG00000092964.12	DPYSL2	protein_coding	19617	-1.57694	0.0736917	-7.82907	4.91496e-15	8.86506e-14	DEG
ENSG00000104047.10	DTWD1	protein_coding	1778.58	-2.17702	0.150524	-7.81949	5.30393e-15	9.55712e-14	DEG
ENSG00000140105.13	WARS	protein_coding	7294.56	-1.80744	0.103278	-7.81815	5.36071e-15	9.64981e-14	DEG
ENSG00000101144.8	BMP7	protein_coding	118.785	6.37125	0.688541	7.80091	6.14612e-15	1.10526e-13	DEG
ENSG00000163683.7	SMIM14	protein_coding	4974.81	-1.83974	0.107656	-7.80027	6.17771e-15	1.10984e-13	DEG
ENSG00000187735.8	TCEA1	protein_coding	13163.4	-1.55788	0.0715547	-7.79658	6.36099e-15	1.14163e-13	DEG
ENSG00000175093.4	SPSB4	protein_coding	102.434	6.76934	0.740259	7.79368	6.50876e-15	1.167e-13	DEG
ENSG00000100345.16	MYH9	protein_coding	6013.15	-1.83186	0.106853	-7.78515	6.96307e-15	1.24722e-13	DEG
ENSG00000107518.12	ATRNL1	protein_coding	225.712	3.80358	0.360143	7.78462	6.9925e-15	1.25125e-13	DEG
ENSG00000063660.4	GPC1	protein_coding	23469.6	-1.58787	0.075675	-7.76834	7.95244e-15	1.42162e-13	DEG
ENSG00000106333.8	PCOLCE	protein_coding	2147.59	-2.02153	0.13163	-7.76059	8.45354e-15	1.5097e-13	DEG
ENSG00000204389.8	HSPA1A	protein_coding	1572.57	2.13467	0.146251	7.75837	8.60293e-15	1.53487e-13	DEG
ENSG00000157613.6	CREB3L1	protein_coding	866.502	-2.30962	0.168822	-7.75737	8.6708e-15	1.54545e-13	DEG
ENSG00000224189.2	HOXD-AS1	antisense	101.04	6.7472	0.741482	7.75095	9.1205e-15	1.62401e-13	DEG
ENSG00000113504.15	SLC12A7	protein_coding	551.909	2.54901	0.199955	7.7468	9.42351e-15	1.67631e-13	DEG
ENSG00000167130.13	DOLPP1	protein_coding	1297.49	2.07501	0.138859	7.74174	9.80632e-15	1.74269e-13	DEG
ENSG00000139567.8	ACVRL1	protein_coding	2432.71	-1.82375	0.106455	-7.73804	1.00964e-14	1.79248e-13	DEG
ENSG00000065308.4	TRAM2	protein_coding	4793.47	-1.68407	0.0884054	-7.73786	1.01101e-14	1.79315e-13	DEG
ENSG00000183018.4	SPNS2	protein_coding	123.069	5.27554	0.554396	7.71206	1.23805e-14	2.1937e-13	DEG
ENSG00000005073.5	HOXA11	protein_coding	680.612	-2.38737	0.180637	-7.68042	1.58574e-14	2.807e-13	DEG
ENSG00000259345.1	RP11-624L4.1	antisense	89.0602	-6.14425	0.67045	-7.67283	1.68245e-14	2.97529e-13	DEG
ENSG00000206557.5	TRIM71	protein_coding	98.2886	6.70017	0.744295	7.65849	1.88131e-14	3.3237e-13	DEG
ENSG00000114646.5	CSPG5	protein_coding	127.601	4.48589	0.455432	7.65403	1.94782e-14	3.43785e-13	DEG
ENSG00000128641.13	MYO1B	protein_coding	12798.1	-1.54946	0.0718304	-7.64939	2.01939e-14	3.5607e-13	DEG
ENSG00000100591.3	AHSA1	protein_coding	4894.36	1.69045	0.09036	7.64115	2.15286e-14	3.79235e-13	DEG
ENSG00000169231.9	THBS3	protein_coding	887.849	-2.20305	0.157781	-7.62482	2.44368e-14	4.30045e-13	DEG
ENSG00000092621.7	PHGDH	protein_coding	2960.35	-1.7967	0.104509	-7.62327	2.47337e-14	4.34846e-13	DEG
ENSG00000154319.10	FAM167A	protein_coding	1377.4	-2.11276	0.145977	-7.62289	2.48067e-14	4.35706e-13	DEG
ENSG00000140262.13	TCF12	protein_coding	5521.58	-1.68632	0.0900793	-7.61909	2.55478e-14	4.48289e-13	DEG
ENSG00000077942.13	FBLN1	protein_coding	13003.8	-1.71023	0.0933329	-7.60965	2.74845e-14	4.81804e-13	DEG
ENSG00000076258.5	FMO4	protein_coding	580.52	-2.52655	0.201106	-7.59077	3.18014e-14	5.5694e-13	DEG
ENSG00000223638.3	RFPL4A	protein_coding	94.7733	6.65898	0.745528	7.59056	3.18514e-14	5.57276e-13	DEG
ENSG00000168497.4	SDPR	protein_coding	125.042	-4.76714	0.496396	-7.58898	3.22442e-14	5.63603e-13	DEG
ENSG00000113361.8	CDH6	protein_coding	97.8541	-5.29559	0.566121	-7.58776	3.25491e-14	5.68384e-13	DEG
ENSG00000148835.9	TAF5	protein_coding	1228.15	2.10097	0.145141	7.5855	3.31203e-14	5.77801e-13	DEG
ENSG00000100644.12	HIF1A	protein_coding	28748.2	-1.52623	0.0695058	-7.57098	3.7041e-14	6.45578e-13	DEG
ENSG00000137561.4	TTPA	protein_coding	127.952	4.62886	0.479808	7.56315	3.93414e-14	6.8501e-13	DEG
ENSG00000137265.10	IRF4	protein_coding	97.3078	6.03423	0.665939	7.55959	4.04334e-14	7.03346e-13	DEG
ENSG00000130829.13	DUSP9	protein_coding	106.618	5.63536	0.613416	7.55664	4.13627e-14	7.18821e-13	DEG
ENSG00000131386.13	GALNT15	protein_coding	193.198	-3.71206	0.359191	-7.55046	4.33714e-14	7.53006e-13	DEG
ENSG00000111077.13	TENC1	protein_coding	1141.81	-2.36653	0.181133	-7.54432	4.5464e-14	7.88581e-13	DEG
ENSG00000024422.7	EHD2	protein_coding	3838.46	-1.80756	0.107258	-7.52917	5.10637e-14	8.84859e-13	DEG
ENSG00000010310.4	GIPR	protein_coding	77.7148	5.50356	0.598522	7.52447	5.29333e-14	9.1638e-13	DEG
ENSG00000069667.11	RORA	protein_coding	2414	1.86573	0.115191	7.51564	5.66337e-14	9.79503e-13	DEG
ENSG00000163453.7	IGFBP7	protein_coding	69566.5	-1.54828	0.0730216	-7.50846	5.98287e-14	1.03377e-12	DEG
ENSG00000117411.12	B4GALT2	protein_coding	4717.11	-1.82044	0.109389	-7.5002	6.37211e-14	1.09998e-12	DEG
ENSG00000162769.8	FLVCR1	protein_coding	1149.14	2.28091	0.170888	7.49562	6.5985e-14	1.13797e-12	DEG
ENSG00000175305.12	CCNE2	protein_coding	2107.54	1.98589	0.131585	7.49242	6.76137e-14	1.16495e-12	DEG
ENSG00000140284.6	SLC27A2	protein_coding	119.027	4.74569	0.500978	7.47675	7.61805e-14	1.3113e-12	DEG
ENSG00000069482.6	GAL	protein_coding	870.108	2.30744	0.175015	7.47045	7.99191e-14	1.37435e-12	DEG
ENSG00000129128.8	SPCS3	protein_coding	17214.5	1.57474	0.0769696	7.46711	8.19757e-14	1.40838e-12	DEG
ENSG00000077152.5	UBE2T	protein_coding	2898.66	1.77548	0.103931	7.46151	8.55373e-14	1.46817e-12	DEG
ENSG00000186897.3	C1QL4	protein_coding	93.7764	5.98144	0.668733	7.44908	9.39952e-14	1.61182e-12	DEG
ENSG00000162576.12	MXRA8	protein_coding	28742.8	-1.6259	0.0841854	-7.43473	1.04785e-13	1.79514e-12	DEG
ENSG00000184260.4	HIST2H2AC	protein_coding	4432.71	-1.77911	0.104872	-7.42914	1.09308e-13	1.87085e-12	DEG
ENSG00000145194.13	ECE2	protein_coding	885.306	2.21542	0.16376	7.42198	1.15384e-13	1.97299e-12	DEG
ENSG00000119686.5	FLVCR2	protein_coding	312.314	2.97611	0.266297	7.4207	1.16499e-13	1.99017e-12	DEG
ENSG00000135363.7	LMO2	protein_coding	212.387	3.97212	0.400895	7.41372	1.22806e-13	2.09592e-12	DEG
ENSG00000133116.6	KL	protein_coding	100.717	5.92276	0.664447	7.4088	1.27446e-13	2.17306e-12	DEG
ENSG00000106538.5	RARRES2	protein_coding	1149.86	-2.07903	0.145833	-7.3991	1.37116e-13	2.33574e-12	DEG
ENSG00000260578.1	CTD-2541J13.1	lincRNA	200.458	-3.75633	0.372791	-7.39376	1.42732e-13	2.42912e-12	DEG
ENSG00000166444.13	ST5	protein_coding	746.485	-2.62737	0.220213	-7.38999	1.46845e-13	2.49678e-12	DEG
ENSG00000159387.7	IRX6	protein_coding	107.081	5.18552	0.566793	7.38457	1.52945e-13	2.59806e-12	DEG
ENSG00000074211.9	PPP2R2C	protein_coding	91.4954	6.55983	0.753489	7.37877	1.59759e-13	2.71126e-12	DEG
ENSG00000054277.8	OPN3	protein_coding	1390.9	-1.97535	0.132318	-7.37128	1.68996e-13	2.86533e-12	DEG
ENSG00000124343.8	XG	protein_coding	224.438	-3.46037	0.334721	-7.35052	1.97436e-13	3.34439e-12	DEG
ENSG00000128578.5	STRIP2	protein_coding	820.999	2.25853	0.171228	7.35006	1.98113e-13	3.35272e-12	DEG
ENSG00000162630.5	B3GALT2	protein_coding	81.4098	-6.53328	0.753948	-7.33907	2.15078e-13	3.63642e-12	DEG
ENSG00000196923.9	PDLIM7	protein_coding	1818.32	-1.9354	0.127626	-7.3292	2.31532e-13	3.91096e-12	DEG
ENSG00000170390.10	DCLK2	protein_coding	1897.65	-1.9164	0.125143	-7.32277	2.42899e-13	4.09915e-12	DEG
ENSG00000035403.12	VCL	protein_coding	18198.7	-1.53935	0.0737676	-7.3115	2.64171e-13	4.45398e-12	DEG
ENSG00000235750.5	KIAA0040	protein_coding	625.537	2.56789	0.21453	7.30847	2.70196e-13	4.55132e-12	DEG
ENSG00000138135.5	CH25H	protein_coding	300.647	-3.10278	0.287751	-7.30765	2.71851e-13	4.57494e-12	DEG
ENSG00000119280.12	C1orf198	protein_coding	10182.9	-1.6078	0.0832559	-7.30042	2.86873e-13	4.82325e-12	DEG
ENSG00000223417.4	TRIM49D1	protein_coding	85.1061	6.50026	0.753607	7.29857	2.90842e-13	4.88544e-12	DEG
ENSG00000186522.10	SEPT10	protein_coding	8316.48	-1.64547	0.0884693	-7.29593	2.96603e-13	4.97759e-12	DEG
ENSG00000037280.11	FLT4	protein_coding	87.9818	6.50972	0.75547	7.29309	3.02916e-13	5.07883e-12	DEG
ENSG00000242114.1	MTFP1	protein_coding	776.146	2.24066	0.170325	7.28407	3.23904e-13	5.4257e-12	DEG
ENSG00000177791.11	MYOZ1	protein_coding	93.2112	-5.56685	0.627149	-7.28192	3.29113e-13	5.50785e-12	DEG
ENSG00000049192.10	ADAMTS6	protein_coding	2672.29	-1.76076	0.104583	-7.27423	3.48401e-13	5.82525e-12	DEG
ENSG00000142178.7	SIK1	protein_coding	393.004	2.87822	0.258281	7.27202	3.54164e-13	5.91615e-12	DEG
ENSG00000079102.12	RUNX1T1	protein_coding	790.604	-2.54189	0.212076	-7.27045	3.583e-13	5.97971e-12	DEG
ENSG00000184292.5	TACSTD2	protein_coding	140.521	4.20662	0.442119	7.25285	4.0809e-13	6.80438e-12	DEG
ENSG00000106031.6	HOXA13	protein_coding	1509.33	-1.97329	0.13441	-7.24122	4.4466e-13	7.40732e-12	DEG
ENSG00000147402.7	GABRQ	protein_coding	96.5881	5.70005	0.650785	7.22212	5.11832e-13	8.51846e-12	DEG
ENSG00000143126.7	CELSR2	protein_coding	397.596	2.70278	0.236007	7.21499	5.39383e-13	8.96874e-12	DEG
ENSG00000110002.11	VWA5A	protein_coding	377.16	-2.78661	0.247879	-7.20759	5.69519e-13	9.4554e-12	DEG
ENSG00000137571.6	SLCO5A1	protein_coding	133.299	4.27983	0.455055	7.20754	5.69697e-13	9.4554e-12	DEG
ENSG00000170961.6	HAS2	protein_coding	945.955	-2.13013	0.157258	-7.18643	6.65085e-13	1.10285e-11	DEG
ENSG00000198208.7	RPS6KL1	protein_coding	286.436	3.60128	0.362401	7.1779	7.07929e-13	1.17281e-11	DEG
ENSG00000133477.12	FAM83F	protein_coding	101.439	5.58266	0.638727	7.17468	7.24773e-13	1.19896e-11	DEG
ENSG00000213347.6	MXD3	protein_coding	1009.36	-2.296	0.180636	-7.17463	7.25033e-13	1.19896e-11	DEG
ENSG00000172031.6	EPHX4	protein_coding	490.248	2.52113	0.212721	7.15083	8.62574e-13	1.4251e-11	DEG
ENSG00000111058.3	ACSS3	protein_coding	647.46	-2.40992	0.197385	-7.14302	9.13017e-13	1.50706e-11	DEG
ENSG00000204485.2	XX-FW84067D5.1	pseudogene	79.9252	6.41235	0.757777	7.1424	9.17123e-13	1.51246e-11	DEG
ENSG00000138669.5	PRKG2	protein_coding	211.743	-3.46508	0.34564	-7.13194	9.8964e-13	1.63056e-11	DEG
ENSG00000165209.14	STRBP	protein_coding	1001.09	2.18988	0.166888	7.12979	1.00525e-12	1.65477e-11	DEG
ENSG00000154553.9	PDLIM3	protein_coding	85.5367	6.07714	0.71321	7.11871	1.08944e-12	1.79174e-11	DEG
ENSG00000198435.2	NRARP	protein_coding	98.449	5.05642	0.569981	7.11676	1.10497e-12	1.81563e-11	DEG
ENSG00000119888.6	EPCAM	protein_coding	137.722	4.58286	0.503675	7.11344	1.13187e-12	1.85814e-11	DEG
ENSG00000115541.6	HSPE1	protein_coding	2403.85	1.82707	0.116477	7.10077	1.24063e-12	2.03484e-11	DEG
ENSG00000076944.10	STXBP2	protein_coding	198.894	3.91863	0.411108	7.09942	1.25278e-12	2.05291e-11	DEG
ENSG00000116983.8	HPCAL4	protein_coding	78.6218	6.38704	0.759152	7.09613	1.28303e-12	2.10057e-11	DEG
ENSG00000182315.4	MBD3L3	protein_coding	78.5319	6.3852	0.759246	7.09284	1.31392e-12	2.14919e-11	DEG
ENSG00000160226.11	C21orf2	protein_coding	402.93	-2.60578	0.22667	-7.0842	1.39853e-12	2.28553e-11	DEG
ENSG00000169248.8	CXCL11	protein_coding	80.2179	6.38907	0.76075	7.0839	1.40157e-12	2.28842e-11	DEG
ENSG00000137831.10	UACA	protein_coding	7244.06	-2.95594	0.276177	-7.08221	1.41877e-12	2.31442e-11	DEG
ENSG00000076864.15	RAP1GAP	protein_coding	129.398	4.52272	0.497639	7.07886	1.45341e-12	2.3688e-11	DEG
ENSG00000086300.11	SNX10	protein_coding	93.0402	5.76065	0.673454	7.06901	1.56044e-12	2.54094e-11	DEG
ENSG00000111262.4	KCNA1	protein_coding	78.0891	6.3723	0.760151	7.06741	1.57858e-12	2.56817e-11	DEG
ENSG00000163584.13	RPL22L1	protein_coding	6369.21	-1.78223	0.110781	-7.06104	1.65258e-12	2.68615e-11	DEG
ENSG00000165929.8	TC2N	protein_coding	158.147	3.86615	0.406002	7.05947	1.67144e-12	2.71436e-11	DEG
ENSG00000170745.7	KCNS3	protein_coding	212.892	3.57181	0.36477	7.05049	1.78288e-12	2.89275e-11	DEG
ENSG00000197956.5	S100A6	protein_coding	38576.3	-1.55761	0.0790921	-7.05009	1.788e-12	2.89845e-11	DEG
ENSG00000133985.2	TTC9	protein_coding	355.129	2.77613	0.251976	7.04882	1.80447e-12	2.92253e-11	DEG
ENSG00000185070.6	FLRT2	protein_coding	3417.23	-1.73988	0.104969	-7.04861	1.8072e-12	2.92433e-11	DEG
ENSG00000136997.10	MYC	protein_coding	397.604	-2.66889	0.236817	-7.04718	1.82579e-12	2.95178e-11	DEG
ENSG00000137285.9	TUBB2B	protein_coding	2146.17	1.85979	0.122104	7.04149	1.90199e-12	3.07223e-11	DEG
ENSG00000155760.1	FZD7	protein_coding	7147.08	-1.5983	0.0850309	-7.0363	1.97412e-12	3.1859e-11	DEG
ENSG00000185008.13	ROBO2	protein_coding	909.741	-2.52231	0.21642	-7.03404	2.00634e-12	3.235e-11	DEG
ENSG00000108106.9	UBE2S	protein_coding	3925.22	1.64291	0.0914679	7.02879	2.08325e-12	3.35602e-11	DEG
ENSG00000168936.6	TMEM129	protein_coding	4394.44	-1.65184	0.0928262	-7.02218	2.18439e-12	3.51582e-11	DEG
ENSG00000084628.5	NKAIN1	protein_coding	101.421	5.09352	0.584123	7.00797	2.41809e-12	3.8885e-11	DEG
ENSG00000248235.2	AC037459.4	protein_coding	1247.97	-2.15157	0.164328	-7.00775	2.42178e-12	3.89099e-11	DEG
ENSG00000141738.9	GRB7	protein_coding	110.929	4.5365	0.504923	7.00404	2.48679e-12	3.99188e-11	DEG
ENSG00000104765.10	BNIP3L	protein_coding	9766.86	-1.58374	0.0833706	-7.00174	2.52809e-12	4.05459e-11	DEG
ENSG00000106078.13	COBL	protein_coding	75.6001	6.33087	0.761937	6.99647	2.62498e-12	4.20625e-11	DEG
ENSG00000144642.16	RBMS3	protein_coding	1892.39	-1.8628	0.123408	-6.99146	2.7204e-12	4.3553e-11	DEG
ENSG00000185015.3	CA13	protein_coding	401.569	2.61005	0.230348	6.98964	2.75602e-12	4.40841e-11	DEG
ENSG00000106689.6	LHX2	protein_coding	91.4498	5.94566	0.707757	6.9878	2.79234e-12	4.46256e-11	DEG
ENSG00000143751.9	SDE2	protein_coding	3453.08	1.67885	0.0972777	6.97852	2.98313e-12	4.76327e-11	DEG
ENSG00000108852.10	MPP2	protein_coding	454.118	2.61783	0.232071	6.97126	3.14125e-12	5.01132e-11	DEG
ENSG00000145911.5	N4BP3	protein_coding	353.139	2.84251	0.264678	6.96133	3.37078e-12	5.37275e-11	DEG
ENSG00000107957.12	SH3PXD2A	protein_coding	5339.36	-1.73153	0.105103	-6.96012	3.39988e-12	5.41197e-11	DEG
ENSG00000139116.13	KIF21A	protein_coding	799.879	2.51398	0.217525	6.96006	3.40137e-12	5.41197e-11	DEG
ENSG00000162458.8	FBLIM1	protein_coding	5055.1	-1.7092	0.101904	-6.95951	3.41463e-12	5.4283e-11	DEG
ENSG00000134574.7	DDB2	protein_coding	2217.16	-1.76627	0.110227	-6.95173	3.60837e-12	5.73125e-11	DEG
ENSG00000178035.7	IMPDH2	protein_coding	7293.5	-1.56172	0.0809092	-6.94264	3.84827e-12	6.10693e-11	DEG
ENSG00000184564.8	SLITRK6	protein_coding	75.6623	-6.01358	0.722621	-6.93805	3.97547e-12	6.30326e-11	DEG
ENSG00000152377.8	SPOCK1	protein_coding	7811.74	-2.00027	0.144203	-6.93652	4.01867e-12	6.36618e-11	DEG
ENSG00000228998.3	RP11-697E2.7	pseudogene	342.695	-2.82853	0.263659	-6.9352	4.05653e-12	6.42054e-11	DEG
ENSG00000232040.2	SCAND3	protein_coding	334.095	3.15033	0.31015	6.9332	4.11439e-12	6.50641e-11	DEG
ENSG00000034053.10	APBA2	protein_coding	2075.57	1.8146	0.117659	6.92341	4.40899e-12	6.96621e-11	DEG
UL91	UL91	CMV	76.1928	6.30201	0.76592	6.9224	4.44046e-12	7.00981e-11	DEG
ENSG00000247809.3	NR2F2-AS1	antisense	213.474	-4.24685	0.469095	-6.92153	4.46804e-12	7.04719e-11	DEG
ENSG00000071282.7	LMCD1	protein_coding	640.722	-2.30711	0.188994	-6.91614	4.64104e-12	7.31368e-11	DEG
ENSG00000160796.12	NBEAL2	protein_coding	609.653	2.42285	0.205877	6.91115	4.80753e-12	7.56946e-11	DEG
ENSG00000109625.14	CPZ	protein_coding	1073.91	-2.02081	0.14787	-6.90346	5.07514e-12	7.98386e-11	DEG
ENSG00000120949.10	TNFRSF8	protein_coding	73.54	6.27843	0.765363	6.89663	5.3249e-12	8.36948e-11	DEG
ENSG00000128714.5	HOXD13	protein_coding	164.916	3.71959	0.394444	6.89475	5.39599e-12	8.47385e-11	DEG
ENSG00000014138.4	POLA2	protein_coding	2008.16	1.92639	0.134382	6.8937	5.43594e-12	8.5292e-11	DEG
ENSG00000169247.7	SH3TC2	protein_coding	198.736	-3.33151	0.338327	-6.8913	5.52857e-12	8.66702e-11	DEG
ENSG00000137558.3	PI15	protein_coding	79.7727	-5.35915	0.633128	-6.8851	5.77488e-12	9.04532e-11	DEG
ENSG00000163235.11	TGFA	protein_coding	79.2827	5.70294	0.683353	6.88214	5.89592e-12	9.22691e-11	DEG
ENSG00000072163.14	LIMS2	protein_coding	619.175	-2.32186	0.192156	-6.87909	6.02354e-12	9.41848e-11	DEG
ENSG00000222041.6	LINC00152	lincRNA	2138.6	-1.92904	0.135243	-6.86941	6.44685e-12	1.00717e-10	DEG
ENSG00000109971.9	HSPA8	protein_coding	179131	1.60149	0.0876075	6.86574	6.61472e-12	1.0325e-10	DEG
ENSG00000105011.4	ASF1B	protein_coding	2898.1	1.81252	0.11839	6.86304	6.74094e-12	1.0513e-10	DEG
ENSG00000164088.13	PPM1M	protein_coding	1580	-1.87078	0.127141	-6.84896	7.43893e-12	1.15915e-10	DEG
ENSG00000184515.6	BEX5	protein_coding	72.959	6.25067	0.767799	6.83859	7.99764e-12	1.24514e-10	DEG
ENSG00000163162.4	RNF149	protein_coding	9296.16	1.53417	0.0781284	6.83704	8.08473e-12	1.25762e-10	DEG
ENSG00000136732.10	GYPC	protein_coding	3676.11	-1.98005	0.143349	-6.83683	8.09672e-12	1.2584e-10	DEG
ENSG00000205336.7	GPR56	protein_coding	129.392	4.00137	0.439538	6.82845	8.58352e-12	1.33291e-10	DEG
ENSG00000187123.10	LYPD6	protein_coding	723.653	2.24989	0.183098	6.82637	8.70891e-12	1.35122e-10	DEG
ENSG00000151914.13	DST	protein_coding	17228	-1.8238	0.120718	-6.82417	8.84322e-12	1.37089e-10	DEG
ENSG00000079308.12	TNS1	protein_coding	2027.79	-2.27029	0.186162	-6.8236	8.87867e-12	1.37521e-10	DEG
ENSG00000163637.7	PRICKLE2	protein_coding	2060.98	-2.00722	0.14764	-6.82215	8.96858e-12	1.38794e-10	DEG
ENSG00000104936.13	DMPK	protein_coding	877.086	-2.1516	0.168941	-6.8166	9.32206e-12	1.44141e-10	DEG
ENSG00000196932.7	TMEM26	protein_coding	255.25	-3.08082	0.30609	-6.79805	1.06045e-11	1.63831e-10	DEG
ENSG00000142798.12	HSPG2	protein_coding	4080.09	-1.84729	0.124677	-6.79587	1.07659e-11	1.66152e-10	DEG
ENSG00000261787.1	TCF24	protein_coding	71.5665	6.22523	0.768894	6.79578	1.07731e-11	1.66152e-10	DEG
ENSG00000244509.3	APOBEC3C	protein_coding	1259.06	-1.94588	0.139693	-6.77111	1.27801e-11	1.96938e-10	DEG
ENSG00000152192.6	POU4F1	protein_coding	70.5934	6.20845	0.769557	6.76811	1.30471e-11	2.00882e-10	DEG
ENSG00000130675.10	MNX1	protein_coding	75.979	5.64551	0.686448	6.76746	1.31062e-11	2.01619e-10	DEG
ENSG00000110324.5	IL10RA	protein_coding	69.4127	6.20203	0.768786	6.76655	1.31888e-11	2.02718e-10	DEG
ENSG00000117707.11	PROX1	protein_coding	166.224	3.59403	0.383419	6.76552	1.32829e-11	2.03991e-10	DEG
ENSG00000257951.1	RP11-554D14.4	pseudogene	71.8505	6.21174	0.770753	6.76187	1.36219e-11	2.09019e-10	DEG
ENSG00000134955.7	SLC37A2	protein_coding	491.347	2.48215	0.219478	6.75306	1.44762e-11	2.2194e-10	DEG
ENSG00000142910.11	TINAGL1	protein_coding	1731.12	-1.81721	0.12109	-6.74879	1.49088e-11	2.28378e-10	DEG
ENSG00000225581.3	TRIM53AP	pseudogene	68.6336	6.18815	0.769342	6.74362	1.54486e-11	2.36448e-10	DEG
ENSG00000084444.9	KIAA1467	protein_coding	817.967	2.17439	0.174155	6.74338	1.54745e-11	2.36643e-10	DEG
ENSG00000139793.14	MBNL2	protein_coding	5580.4	-1.57002	0.0846104	-6.73696	1.61737e-11	2.47127e-10	DEG
ENSG00000249992.1	TMEM158	protein_coding	1062.27	-2.06166	0.157735	-6.73063	1.68927e-11	2.57895e-10	DEG
ENSG00000166881.5	TMEM194A	protein_coding	7368.13	1.61958	0.0921299	6.72505	1.7553e-11	2.67751e-10	DEG
ENSG00000138399.13	FASTKD1	protein_coding	2618.24	1.7952	0.1183	6.72188	1.79398e-11	2.73419e-10	DEG
ENSG00000006282.15	SPATA20	protein_coding	2681.14	-1.83076	0.123758	-6.71277	1.90968e-11	2.90809e-10	DEG
ENSG00000235609.4	AF127936.7	lincRNA	433.845	-2.49176	0.222299	-6.7106	1.93831e-11	2.9492e-10	DEG
ENSG00000023330.10	ALAS1	protein_coding	3151.22	1.66227	0.0986942	6.71035	1.9416e-11	2.95172e-10	DEG
ENSG00000196968.6	FUT11	protein_coding	734.839	-2.17569	0.175235	-6.70924	1.95636e-11	2.97166e-10	DEG
ENSG00000151117.4	TMEM86A	protein_coding	459.012	2.4862	0.221584	6.70713	1.98488e-11	3.01245e-10	DEG
ENSG00000115109.9	EPB41L5	protein_coding	1841.07	1.95885	0.143099	6.7006	2.07567e-11	3.14761e-10	DEG
ENSG00000231672.2	DIRC3	protein_coding	151.355	-3.59584	0.387493	-6.69906	2.0976e-11	3.1782e-10	DEG
ENSG00000197296.5	FITM2	protein_coding	628.363	-2.23021	0.18367	-6.69793	2.11389e-11	3.2002e-10	DEG
ENSG00000169884.9	WNT10B	protein_coding	101.32	4.65029	0.54514	6.69606	2.1411e-11	3.23868e-10	DEG
ENSG00000183801.3	OLFML1	protein_coding	95.8751	-4.42482	0.512611	-6.68113	2.37111e-11	3.58361e-10	DEG
ENSG00000162614.14	NEXN	protein_coding	376.98	-2.59209	0.238374	-6.67899	2.40601e-11	3.63332e-10	DEG
ENSG00000188338.10	SLC38A3	processed_transcript	75.9981	5.12562	0.618287	6.67266	2.51202e-11	3.79024e-10	DEG
ENSG00000035664.7	DAPK2	protein_coding	383.303	-2.58953	0.238609	-6.66165	2.7077e-11	4.08208e-10	DEG
ENSG00000163884.3	KLF15	protein_coding	367.838	2.75339	0.263378	6.65731	2.78885e-11	4.20093e-10	DEG
ENSG00000165156.10	ZHX1	protein_coding	3565.66	-1.64877	0.0975998	-6.64721	2.98707e-11	4.49577e-10	DEG
ENSG00000076826.5	CAMSAP3	protein_coding	70.469	5.8196	0.725197	6.64591	3.01346e-11	4.53172e-10	DEG
ENSG00000088386.11	SLC15A1	protein_coding	66.4016	6.13388	0.772508	6.64573	3.01708e-11	4.53339e-10	DEG
ENSG00000113578.13	FGF1	protein_coding	195.832	-3.26659	0.341531	-6.63655	3.2112e-11	4.82107e-10	DEG
ENSG00000255571.2	LINC00925	lincRNA	68.6064	6.13971	0.774623	6.63512	3.24246e-11	4.86396e-10	DEG
ENSG00000242125.2	SNHG3	sense_intronic	2431.16	-2.11285	0.167747	-6.63412	3.26437e-11	4.89278e-10	DEG
ENSG00000170577.7	SIX2	protein_coding	225.81	3.37626	0.358699	6.62466	3.48057e-11	5.2125e-10	DEG
ENSG00000128567.12	PODXL	protein_coding	198.514	3.33893	0.353164	6.62278	3.52508e-11	5.2748e-10	DEG
ENSG00000128228.4	SDF2L1	protein_coding	406.604	2.58511	0.239349	6.62259	3.52968e-11	5.2773e-10	DEG
ENSG00000133112.12	TPT1	protein_coding	32281.6	-1.51888	0.0783765	-6.62034	3.58366e-11	5.35359e-10	DEG
ENSG00000145824.8	CXCL14	protein_coding	290.065	2.99624	0.301602	6.61878	3.62166e-11	5.4059e-10	DEG
ENSG00000112149.5	CD83	protein_coding	710.239	2.1917	0.18022	6.6125	3.77881e-11	5.63582e-10	DEG
ENSG00000260027.3	HOXB7	protein_coding	64.8842	6.10338	0.773872	6.59461	4.26381e-11	6.35393e-10	DEG
ENSG00000003249.9	DBNDD1	protein_coding	371.732	2.61463	0.244925	6.59237	4.3287e-11	6.44531e-10	DEG
ENSG00000160072.15	ATAD3B	protein_coding	2197.37	1.73039	0.110883	6.58706	4.48608e-11	6.67415e-10	DEG
ENSG00000198624.8	CCDC69	protein_coding	802.594	2.15344	0.175307	6.57954	4.7192e-11	7.0152e-10	DEG
ENSG00000182389.14	CACNB4	protein_coding	127.704	3.80532	0.426674	6.57484	4.87045e-11	7.2341e-10	DEG
ENSG00000128833.8	MYO5C	protein_coding	99.828	4.26654	0.497312	6.5684	5.08586e-11	7.54166e-10	DEG
ENSG00000172159.11	FRMD3	protein_coding	115.787	4.02549	0.46061	6.56845	5.08411e-11	7.54166e-10	DEG
ENSG00000080493.9	SLC4A4	protein_coding	313.261	2.6953	0.258475	6.55885	5.42229e-11	8.03397e-10	DEG
ENSG00000267022.1	ZNF223	protein_coding	63.6491	6.07583	0.775268	6.5472	5.86269e-11	8.67937e-10	DEG
ENSG00000116985.6	BMP8B	protein_coding	77.335	5.15884	0.635583	6.54335	6.01572e-11	8.89864e-10	DEG
ENSG00000169914.5	OTUD3	protein_coding	1248.28	2.21553	0.185816	6.54159	6.08698e-11	8.99669e-10	DEG
ENSG00000263424.1	CTD-2541J13.2	antisense	129.994	-3.74725	0.420169	-6.53843	6.21675e-11	9.181e-10	DEG
ENSG00000148826.6	NKX6-2	protein_coding	63.5608	6.07106	0.775689	6.53749	6.25598e-11	9.2314e-10	DEG
ENSG00000099953.5	MMP11	protein_coding	706.905	-2.13736	0.17413	-6.53169	6.50335e-11	9.5886e-10	DEG
ENSG00000184113.8	CLDN5	protein_coding	78.0215	5.35198	0.6664	6.53058	6.55157e-11	9.65182e-10	DEG
ENSG00000161395.8	PGAP3	protein_coding	408.932	-2.54843	0.237143	-6.52951	6.59873e-11	9.71339e-10	DEG
ENSG00000105664.6	COMP	protein_coding	165.314	-3.36063	0.361562	-6.52896	6.62285e-11	9.74097e-10	DEG
ENSG00000166963.8	MAP1A	protein_coding	3157.09	-1.84671	0.129735	-6.52642	6.73595e-11	9.89928e-10	DEG
ENSG00000113805.8	CNTN3	protein_coding	1127.35	-1.94512	0.14482	-6.52618	6.74701e-11	9.90747e-10	DEG
ENSG00000104320.9	NBN	protein_coding	5501.77	-1.67888	0.104049	-6.5246	6.81855e-11	1.00044e-09	DEG
ENSG00000113430.5	IRX4	protein_coding	69.0235	5.74301	0.726967	6.52438	6.82849e-11	1.00109e-09	DEG
ENSG00000085831.11	TTC39A	protein_coding	87.7444	5.29284	0.658209	6.522	6.9378e-11	1.01629e-09	DEG
ENSG00000144366.11	GULP1	protein_coding	3999.53	-1.6448	0.0989482	-6.5165	7.1968e-11	1.05338e-09	DEG
ENSG00000145362.12	ANK2	protein_coding	2188.47	-1.78025	0.119766	-6.51476	7.28073e-11	1.0648e-09	DEG
ENSG00000164970.10	FAM219A	protein_coding	1716.21	1.81306	0.124827	6.51349	7.3425e-11	1.07297e-09	DEG
ENSG00000149633.7	KIAA1755	protein_coding	148.864	-3.50165	0.384461	-6.50689	7.67232e-11	1.12026e-09	DEG
ENSG00000146826.10	C7orf43	protein_coding	860.912	2.05889	0.162739	6.50668	7.68278e-11	1.12088e-09	DEG
ENSG00000130294.10	KIF1A	protein_coding	88.1578	5.42023	0.679605	6.50412	7.81508e-11	1.13926e-09	DEG
ENSG00000042062.7	FAM65C	protein_coding	619.09	-2.49932	0.230545	-6.50339	7.85279e-11	1.14384e-09	DEG
ENSG00000079150.13	FKBP7	protein_coding	722.381	-2.15326	0.177484	-6.49781	8.14976e-11	1.18614e-09	DEG
ENSG00000205133.7	TRIQK	protein_coding	2165.13	-1.91843	0.141613	-6.48549	8.84438e-11	1.2862e-09	DEG
ENSG00000157873.13	TNFRSF14	protein_coding	1096.67	-1.99565	0.153526	-6.48521	8.86109e-11	1.2876e-09	DEG
ENSG00000142494.9	SLC47A1	protein_coding	146.161	3.81279	0.433737	6.48502	8.87225e-11	1.28819e-09	DEG
ENSG00000106809.6	OGN	protein_coding	60.607	-6.06009	0.780388	-6.48408	8.92771e-11	1.2952e-09	DEG
ENSG00000166126.6	AMN	protein_coding	125.708	3.86902	0.44271	6.48059	9.13637e-11	1.32441e-09	DEG
ENSG00000051382.4	PIK3CB	protein_coding	1420.4	2.06686	0.16482	6.47288	9.6155e-11	1.39275e-09	DEG
ENSG00000185347.13	C14orf80	protein_coding	822.724	2.04916	0.162303	6.4642	1.01839e-10	1.47389e-09	DEG
ENSG00000177054.9	ZDHHC13	protein_coding	3886.5	1.6724	0.104118	6.45804	1.0607e-10	1.53391e-09	DEG
ENSG00000151726.9	ACSL1	protein_coding	2011.98	1.86216	0.133527	6.45687	1.0689e-10	1.54453e-09	DEG
ENSG00000120254.11	MTHFD1L	protein_coding	2093.74	-1.74748	0.115794	-6.45528	1.08018e-10	1.55958e-09	DEG
ENSG00000177679.14	SRRM3	protein_coding	360.507	2.65847	0.256955	6.45432	1.08703e-10	1.56821e-09	DEG
ENSG00000205403.8	CFI	protein_coding	374.773	-2.64773	0.255818	-6.44102	1.18672e-10	1.71068e-09	DEG
ENSG00000230522.3	MBD3L2	protein_coding	61.3287	6.01561	0.778741	6.44067	1.18949e-10	1.7133e-09	DEG
ENSG00000174136.7	RGMB	protein_coding	6301.1	-1.53171	0.0826139	-6.43603	1.22635e-10	1.76499e-09	DEG
ENSG00000176658.12	MYO1D	protein_coding	10776.1	-1.53562	0.0832503	-6.43386	1.244e-10	1.78896e-09	DEG
ENSG00000175928.5	LRRN1	protein_coding	62.521	5.7327	0.737176	6.42005	1.36232e-10	1.95756e-09	DEG
ENSG00000117480.11	FAAH	protein_coding	174.122	3.93024	0.456858	6.41389	1.41849e-10	2.03504e-09	DEG
ENSG00000169252.4	ADRB2	protein_coding	207.683	3.10069	0.327519	6.41394	1.41809e-10	2.03504e-09	DEG
ENSG00000092758.11	COL9A3	protein_coding	121.108	4.18551	0.497092	6.40829	1.47164e-10	2.10962e-09	DEG
ENSG00000135842.12	FAM129A	protein_coding	5260.92	-1.54587	0.0852248	-6.40503	1.50344e-10	2.15351e-09	DEG
ENSG00000108559.7	NUP88	protein_coding	4576.45	1.88922	0.139084	6.39338	1.62253e-10	2.32225e-09	DEG
ENSG00000167703.10	SLC43A2	protein_coding	1057.69	1.99811	0.15652	6.3769	1.80707e-10	2.58432e-09	DEG
ENSG00000226380.3	MIR29B1	lincRNA	400.134	-3.38459	0.373987	-6.37613	1.81622e-10	2.59535e-09	DEG
ENSG00000204131.6	NHSL2	protein_coding	270.674	-2.76527	0.277366	-6.3644	1.96049e-10	2.79931e-09	DEG
ENSG00000149256.10	TENM4	protein_coding	436.373	-2.78542	0.280906	-6.35592	2.07182e-10	2.95594e-09	DEG
ENSG00000160447.6	PKN3	protein_coding	929.516	2.03405	0.162736	6.35416	2.09562e-10	2.98754e-09	DEG
ENSG00000176485.6	PLA2G16	protein_coding	701.15	2.2478	0.196507	6.3499	2.15452e-10	3.06909e-09	DEG
ENSG00000235863.2	B3GALT4	protein_coding	166.876	-3.38335	0.375687	-6.34398	2.23903e-10	3.18697e-09	DEG
ENSG00000116667.8	C1orf21	protein_coding	1332.77	-1.85517	0.134851	-6.34157	2.27432e-10	3.23465e-09	DEG
ENSG00000204513.5	PRAMEF11	protein_coding	58.9204	5.95741	0.781748	6.34144	2.27623e-10	3.23482e-09	DEG
ENSG00000162878.8	PKDCC	protein_coding	692.204	2.49786	0.236351	6.33745	2.33592e-10	3.31705e-09	DEG
ENSG00000158560.10	DYNC1I1	protein_coding	58.744	5.49646	0.709641	6.33624	2.3544e-10	3.34067e-09	DEG
ENSG00000007372.16	PAX6	protein_coding	58.0773	5.3023	0.679023	6.33602	2.35774e-10	3.34279e-09	DEG
ENSG00000137273.3	FOXF2	protein_coding	1206.86	-1.88407	0.139537	-6.33573	2.36218e-10	3.34619e-09	DEG
ENSG00000150244.8	TRIM48	protein_coding	60.2649	5.96199	0.783189	6.33562	2.36385e-10	3.34619e-09	DEG
ENSG00000116721.9	PRAMEF1	protein_coding	58.7127	5.9495	0.782317	6.32671	2.50436e-10	3.54233e-09	DEG
ENSG00000168143.8	FAM83B	protein_coding	58.4327	5.9455	0.782354	6.32131	2.59352e-10	3.66558e-09	DEG
ENSG00000188732.6	FAM221A	protein_coding	142.4	4.05143	0.483089	6.31651	2.67537e-10	3.77831e-09	DEG
ENSG00000257913.1	RP11-386G11.5	antisense	157.183	3.96128	0.469098	6.31271	2.74183e-10	3.86914e-09	DEG
ENSG00000161267.7	BDH1	protein_coding	333.386	3.01592	0.319516	6.30929	2.8031e-10	3.95252e-09	DEG
ENSG00000168386.14	FILIP1L	protein_coding	411.555	-2.57295	0.249348	-6.30827	2.82179e-10	3.97578e-09	DEG
ENSG00000168405.10	CMAHP	pseudogene	293.046	-2.7952	0.284695	-6.30571	2.86882e-10	4.0389e-09	DEG
ENSG00000152518.5	ZFP36L2	protein_coding	2088.05	-1.74997	0.11903	-6.30069	2.9632e-10	4.16853e-09	DEG
ENSG00000153898.8	MCOLN2	protein_coding	114.189	4.05687	0.485575	6.29536	3.06691e-10	4.31107e-09	DEG
ENSG00000248927.1	CTD-2334D19.1	lincRNA	81.1926	-4.59564	0.571907	-6.28711	3.23425e-10	4.54276e-09	DEG
ENSG00000156535.9	CD109	protein_coding	17865.6	-1.47294	0.0753278	-6.27842	3.42033e-10	4.8004e-09	DEG
ENSG00000117533.10	VAMP4	protein_coding	1885.77	-1.763	0.121543	-6.27764	3.43761e-10	4.82092e-09	DEG
ENSG00000170608.2	FOXA3	protein_coding	57.3765	5.91923	0.78371	6.27685	3.45507e-10	4.84165e-09	DEG
ENSG00000182718.12	ANXA2	protein_coding	152427	-1.41831	0.0666712	-6.27428	3.5126e-10	4.91846e-09	DEG
ENSG00000152455.11	SUV39H2	protein_coding	2005.08	1.7778	0.124086	6.26817	3.6532e-10	5.11138e-09	DEG
ENSG00000062282.10	DGAT2	protein_coding	634.202	2.46116	0.233289	6.26328	3.76964e-10	5.27022e-09	DEG
ENSG00000071967.7	CYBRD1	protein_coding	26845.9	-1.44394	0.0709146	-6.26027	3.84321e-10	5.36892e-09	DEG
ENSG00000138755.5	CXCL9	protein_coding	57.3157	5.90859	0.784777	6.25476	3.9814e-10	5.55768e-09	DEG
ENSG00000261452.1	RP11-509E16.1	lincRNA	64.7753	5.38957	0.702874	6.24517	4.23336e-10	5.90483e-09	DEG
ENSG00000173890.12	GPR160	protein_coding	138.565	3.88607	0.462199	6.24423	4.25894e-10	5.93594e-09	DEG
ENSG00000173406.11	DAB1	protein_coding	154.329	-3.4219	0.388233	-6.23827	4.42444e-10	6.15737e-09	DEG
ENSG00000235034.2	C19orf81	protein_coding	106.864	3.84227	0.455618	6.23826	4.42462e-10	6.15737e-09	DEG
ENSG00000165490.8	C11orf82	protein_coding	1858.91	1.72835	0.116833	6.23412	4.54312e-10	6.31741e-09	DEG
ENSG00000078114.14	NEBL	protein_coding	246.712	3.78	0.446646	6.22418	4.8409e-10	6.72632e-09	DEG
ENSG00000253864.1	AC131025.8	lincRNA	65.0677	-5.05365	0.651915	-6.21806	5.03333e-10	6.98834e-09	DEG
ENSG00000006459.6	JHDM1D	protein_coding	922.277	2.44476	0.232607	6.21116	5.25936e-10	7.29655e-09	DEG
ENSG00000176208.4	ATAD5	protein_coding	886.119	1.97156	0.156464	6.20949	5.31574e-10	7.36912e-09	DEG
ENSG00000206432.4	TMEM200C	protein_coding	55.7875	5.87545	0.786142	6.20174	5.58424e-10	7.73541e-09	DEG
ENSG00000119383.15	PPP2R4	protein_coding	14134.5	-1.45081	0.0727442	-6.19715	5.74932e-10	7.958e-09	DEG
ENSG00000124529.3	HIST1H4B	protein_coding	3944.92	-1.80731	0.130321	-6.19481	5.83538e-10	8.07093e-09	DEG
ENSG00000137975.7	CLCA2	protein_coding	91.6102	-4.42837	0.553502	-6.19396	5.867e-10	8.10847e-09	DEG
ENSG00000117266.11	CDK18	protein_coding	67.3226	5.19173	0.677276	6.18911	6.05053e-10	8.35574e-09	DEG
ENSG00000105255.6	FSD1	protein_coding	1202.3	1.89432	0.144579	6.18567	6.18403e-10	8.53358e-09	DEG
ENSG00000223953.3	C1QTNF5	protein_coding	806.292	-2.03692	0.167689	-6.18362	6.26473e-10	8.63836e-09	DEG
ENSG00000105750.10	ZNF85	protein_coding	680.385	2.54999	0.250684	6.18304	6.28782e-10	8.66359e-09	DEG
ENSG00000172985.8	SH3RF3	protein_coding	583.237	-2.21655	0.196819	-6.18107	6.36699e-10	8.766e-09	DEG
ENSG00000115091.7	ACTR3	protein_coding	9871.16	-1.48478	0.0784943	-6.17603	6.57322e-10	9.04305e-09	DEG
ENSG00000197093.6	GAL3ST4	protein_coding	178.245	-3.10455	0.340772	-6.17584	6.58109e-10	9.04701e-09	DEG
ENSG00000184900.11	SUMO3	protein_coding	4078.2	-1.69384	0.112379	-6.17409	6.6544e-10	9.14083e-09	DEG
ENSG00000140465.9	CYP1A1	protein_coding	55.4377	5.8585	0.787465	6.16979	6.83787e-10	9.38573e-09	DEG
ENSG00000119669.3	IRF2BPL	protein_coding	2091.85	-1.73823	0.119775	-6.1635	7.11537e-10	9.75923e-09	DEG
ENSG00000136040.4	PLXNC1	protein_coding	1164.65	-2.02588	0.16682	-6.14966	7.76497e-10	1.06421e-08	DEG
ENSG00000020633.14	RUNX3	protein_coding	180.622	3.16001	0.351529	6.14462	8.01539e-10	1.0977e-08	DEG
ENSG00000125520.9	SLC2A4RG	protein_coding	1173.54	-1.86872	0.141465	-6.1409	8.20552e-10	1.12289e-08	DEG
ENSG00000177706.8	FAM20C	protein_coding	3913.33	-1.62746	0.102212	-6.1388	8.3146e-10	1.13696e-08	DEG
ENSG00000170035.11	UBE2E3	protein_coding	2851.48	-1.63754	0.103941	-6.13365	8.58827e-10	1.17349e-08	DEG
ENSG00000166548.11	TK2	protein_coding	3946.15	-1.59859	0.0976105	-6.13243	8.65464e-10	1.18167e-08	DEG
ENSG00000132773.7	TOE1	protein_coding	1319.29	1.82368	0.134523	6.12298	9.18417e-10	1.25302e-08	DEG
ENSG00000181938.9	GINS3	protein_coding	1349.76	1.82808	0.135568	6.10824	1.00738e-09	1.37337e-08	DEG
ENSG00000177614.5	PGBD5	protein_coding	110.024	3.90261	0.475228	6.10784	1.0099e-09	1.37576e-08	DEG
ENSG00000169245.4	CXCL10	protein_coding	57.1296	5.53301	0.742316	6.10658	1.01786e-09	1.38556e-08	DEG
ENSG00000063438.12	AHRR	protein_coding	2257	-1.83394	0.13662	-6.10413	1.03365e-09	1.40599e-08	DEG
ENSG00000163710.3	PCOLCE2	protein_coding	100.175	3.91746	0.478748	6.09395	1.10158e-09	1.49727e-08	DEG
ENSG00000269893.2	SNHG8	lincRNA	1953.05	-1.74251	0.12192	-6.09016	1.12801e-09	1.53204e-08	DEG
ENSG00000139318.7	DUSP6	protein_coding	1521.9	-1.99647	0.163648	-6.0891	1.13544e-09	1.54098e-08	DEG
ENSG00000176697.14	BDNF	protein_coding	1531.43	-1.78797	0.129666	-6.07689	1.22535e-09	1.66176e-08	DEG
ENSG00000177409.7	SAMD9L	protein_coding	2383.04	-1.7452	0.122638	-6.07644	1.22883e-09	1.66523e-08	DEG
ENSG00000125731.8	SH2D3A	protein_coding	61.7005	5.30482	0.708519	6.0758	1.23369e-09	1.67056e-08	DEG
ENSG00000128791.7	TWSG1	protein_coding	5028.78	-1.56733	0.0936447	-6.05829	1.37578e-09	1.86158e-08	DEG
ENSG00000164418.15	GRIK2	protein_coding	706.129	-2.25755	0.207785	-6.05219	1.42894e-09	1.93206e-08	DEG
ENSG00000085491.11	SLC25A24	protein_coding	6594.06	-1.49011	0.0810665	-6.04579	1.48682e-09	2.00882e-08	DEG
ENSG00000100385.9	IL2RB	protein_coding	81.1184	4.39669	0.562386	6.03979	1.54314e-09	2.0818e-08	DEG
ENSG00000139874.5	SSTR1	protein_coding	291.419	-2.76411	0.29208	-6.03981	1.54296e-09	2.0818e-08	DEG
ENSG00000143196.4	DPT	protein_coding	729.175	-2.12127	0.185658	-6.03942	1.54669e-09	2.08504e-08	DEG
ENSG00000168505.6	GBX2	protein_coding	72.852	5.19563	0.695801	6.02994	1.64025e-09	2.20951e-08	DEG
ENSG00000153246.7	PLA2R1	protein_coding	1787.91	-1.77178	0.127998	-6.02967	1.64296e-09	2.21151e-08	DEG
ENSG00000166501.8	PRKCB	protein_coding	73.2649	5.01645	0.666437	6.02675	1.67286e-09	2.25009e-08	DEG
ENSG00000109452.8	INPP4B	protein_coding	8193.2	-1.56171	0.0932045	-6.0266	1.67448e-09	2.25059e-08	DEG
ENSG00000182742.5	HOXB4	protein_coding	51.9511	5.76756	0.792013	6.01954	1.74913e-09	2.34918e-08	DEG
ENSG00000175264.3	CHST1	protein_coding	97.8621	3.98405	0.49607	6.01538	1.79463e-09	2.4085e-08	DEG
ENSG00000107798.13	LIPA	protein_coding	5534.17	-1.55193	0.0917565	-6.01521	1.79654e-09	2.40928e-08	DEG
ENSG00000168306.8	ACOX2	protein_coding	173.482	-3.32655	0.387091	-6.01035	1.85129e-09	2.48086e-08	DEG
ENSG00000172201.6	ID4	protein_coding	279.959	2.73896	0.289706	6.00248	1.94327e-09	2.60219e-08	DEG
US34A	US34A	CMV	52.5998	5.75694	0.794176	5.98978	2.10126e-09	2.81168e-08	DEG
ENSG00000111424.6	VDR	protein_coding	584.772	-2.13997	0.190361	-5.98844	2.11865e-09	2.83286e-08	DEG
ENSG00000134775.11	FHOD3	protein_coding	1051.2	-1.9702	0.162087	-5.98567	2.15502e-09	2.87935e-08	DEG
ENSG00000014914.15	MTMR11	protein_coding	959.443	-1.98835	0.165231	-5.9816	2.20951e-09	2.94998e-08	DEG
ENSG00000249156.1	RP11-432M8.9	pseudogene	51.2449	5.74477	0.793365	5.98057	2.22359e-09	2.96659e-08	DEG
ENSG00000144010.7	TRIM43B	pseudogene	51.2834	5.74364	0.793545	5.97778	2.26199e-09	3.01559e-08	DEG
ENSG00000099889.9	ARVCF	protein_coding	534.823	2.20244	0.20121	5.97606	2.28593e-09	3.04526e-08	DEG
ENSG00000139985.5	ADAM21	protein_coding	215.47	2.91561	0.32058	5.97545	2.2946e-09	3.05457e-08	DEG
ENSG00000184254.12	ALDH1A3	protein_coding	715.925	2.56271	0.261751	5.97021	2.36948e-09	3.15193e-08	DEG
ENSG00000124693.2	HIST1H3B	protein_coding	6038.21	-1.6744	0.112981	-5.96915	2.38497e-09	3.17021e-08	DEG
ENSG00000128849.9	CGNL1	protein_coding	71.284	4.69336	0.618797	5.96861	2.39279e-09	3.17827e-08	DEG
ENSG00000160190.9	SLC37A1	protein_coding	316.62	3.14402	0.359284	5.96747	2.40956e-09	3.19819e-08	DEG
ENSG00000164070.7	HSPA4L	protein_coding	3272.53	1.62793	0.105249	5.96615	2.42921e-09	3.22191e-08	DEG
ENSG00000171476.17	HOPX	protein_coding	51.4024	5.73781	0.794349	5.9644	2.4554e-09	3.25427e-08	DEG
ENSG00000073331.13	ALPK1	protein_coding	549.716	-2.36359	0.228629	-5.9642	2.45836e-09	3.25579e-08	DEG
ENSG00000100316.11	RPL3	protein_coding	136453	-1.36903	0.0618983	-5.96181	2.49459e-09	3.30137e-08	DEG
ENSG00000182223.7	ZAR1	protein_coding	67.0634	4.96539	0.665599	5.95762	2.55932e-09	3.38455e-08	DEG
ENSG00000141750.6	STAC2	protein_coding	50.685	5.7303	0.794044	5.95722	2.56563e-09	3.39041e-08	DEG
ENSG00000175602.2	CCDC85B	protein_coding	2603.41	-1.67997	0.114187	-5.95486	2.60292e-09	3.43719e-08	DEG
ENSG00000161036.6	LRWD1	protein_coding	2562.77	1.6332	0.106459	5.94783	2.71724e-09	3.58548e-08	DEG
ENSG00000183837.8	PNMA3	protein_coding	107.305	3.77033	0.465781	5.94771	2.71918e-09	3.58548e-08	DEG
ENSG00000130649.5	CYP2E1	protein_coding	294.906	2.98958	0.334836	5.94197	2.81613e-09	3.7106e-08	DEG
ENSG00000064692.14	SNCAIP	protein_coding	297.054	-2.78094	0.299918	-5.93809	2.8836e-09	3.79674e-08	DEG
ENSG00000172260.9	NEGR1	protein_coding	776.342	-2.11909	0.188486	-5.93727	2.89813e-09	3.81309e-08	DEG
ENSG00000185960.8	SHOX	protein_coding	1078.8	-1.86818	0.1463	-5.93423	2.9522e-09	3.88142e-08	DEG
ENSG00000132386.6	SERPINF1	protein_coding	639.513	-2.27033	0.21415	-5.93196	2.99339e-09	3.93271e-08	DEG
ENSG00000173559.8	NABP1	protein_coding	3765.62	-1.54779	0.0923541	-5.93137	3.00409e-09	3.9439e-08	DEG
ENSG00000259450.1	RP11-265N7.1	lincRNA	73.1782	-4.79396	0.639838	-5.92956	3.03753e-09	3.98491e-08	DEG
ENSG00000181381.9	DDX60L	protein_coding	1424.37	-1.96839	0.163324	-5.9293	3.04235e-09	3.98835e-08	DEG
ENSG00000188783.5	PRELP	protein_coding	137.38	-3.34959	0.396337	-5.92827	3.06148e-09	4.01052e-08	DEG
ENSG00000064300.4	NGFR	protein_coding	63.2756	4.90675	0.659053	5.92783	3.06973e-09	4.01683e-08	DEG
ENSG00000089225.15	TBX5	protein_coding	954.037	-2.10824	0.186957	-5.92777	3.07074e-09	4.01683e-08	DEG
ENSG00000076716.7	GPC4	protein_coding	167.019	3.3817	0.401992	5.92475	3.12765e-09	4.08831e-08	DEG
ENSG00000221926.7	TRIM16	protein_coding	3175.51	-1.66217	0.111807	-5.92238	3.17317e-09	4.14482e-08	DEG
ENSG00000198879.7	SFMBT2	protein_coding	181.833	3.26455	0.38241	5.92179	3.18459e-09	4.15674e-08	DEG
ENSG00000108448.16	TRIM16L	protein_coding	288.208	-2.59209	0.269316	-5.91163	3.38738e-09	4.41825e-08	DEG
ENSG00000083857.9	FAT1	protein_coding	47475	-1.54342	0.0919272	-5.91136	3.39288e-09	4.42223e-08	DEG
ENSG00000173320.5	STOX2	protein_coding	54.9391	5.46195	0.755151	5.90869	3.44833e-09	4.49127e-08	DEG
ENSG00000006047.8	YBX2	protein_coding	50.9628	5.70689	0.796908	5.90644	3.49577e-09	4.54979e-08	DEG
ENSG00000108984.9	MAP2K6	protein_coding	81.3312	-4.30474	0.559562	-5.90594	3.50644e-09	4.56039e-08	DEG
ENSG00000159231.5	CBR3	protein_coding	1197.91	-1.83784	0.142062	-5.89772	3.68564e-09	4.79e-08	DEG
ENSG00000112394.12	SLC16A10	protein_coding	52.055	5.70756	0.798607	5.89472	3.75327e-09	4.87091e-08	DEG
ENSG00000136531.9	SCN2A	protein_coding	93.9392	-4.52488	0.597971	-5.89473	3.75284e-09	4.87091e-08	DEG
ENSG00000135063.13	FAM189A2	protein_coding	50.8615	5.70079	0.797497	5.89442	3.75989e-09	4.87599e-08	DEG
ENSG00000205089.3	CCNI2	protein_coding	50.2986	5.69641	0.796999	5.89262	3.8012e-09	4.92603e-08	DEG
ENSG00000182866.12	LCK	protein_coding	56.3247	5.05294	0.687823	5.89242	3.80576e-09	4.92842e-08	DEG
ENSG00000127863.11	TNFRSF19	protein_coding	1115.13	-1.85265	0.144743	-5.89082	3.84295e-09	4.97302e-08	DEG
ENSG00000157601.9	MX1	protein_coding	1460.96	2.06483	0.180851	5.8879	3.91137e-09	5.05794e-08	DEG
ENSG00000147894.10	C9orf72	protein_coding	935.189	1.91317	0.155143	5.88595	3.95773e-09	5.11423e-08	DEG
ENSG00000087250.4	MT3	protein_coding	49.2742	5.68724	0.796406	5.88548	3.96889e-09	5.125e-08	DEG
ENSG00000197958.8	RPL12	protein_coding	39927.6	-1.47757	0.0811834	-5.88267	4.03711e-09	5.20937e-08	DEG
ENSG00000260977.1	RP11-333I13.1	lincRNA	61.7448	-4.77489	0.641802	-5.88171	4.06058e-09	5.23592e-08	DEG
ENSG00000125841.8	NRSN2	protein_coding	1915.72	-1.67681	0.115241	-5.87296	4.28078e-09	5.51593e-08	DEG
ENSG00000258064.1	RP11-293I14.2	protein_coding	49.107	5.67804	0.797115	5.86872	4.39185e-09	5.65501e-08	DEG
ENSG00000125868.11	DSTN	protein_coding	5242.22	-1.57032	0.0973677	-5.85736	4.70281e-09	6.05111e-08	DEG
ENSG00000000971.11	CFH	protein_coding	4354.33	-1.51966	0.0887775	-5.85356	4.81154e-09	6.18661e-08	DEG
ENSG00000134602.11	MST4	protein_coding	1137.7	1.91519	0.156475	5.84877	4.95235e-09	6.36314e-08	DEG
ENSG00000099282.5	TSPAN15	protein_coding	99.6549	3.7771	0.47484	5.84851	4.95995e-09	6.36838e-08	DEG
ENSG00000198945.3	L3MBTL3	protein_coding	1202.43	1.82119	0.14044	5.84727	4.99719e-09	6.41164e-08	DEG
ENSG00000047249.12	ATP6V1H	protein_coding	1318.06	1.77973	0.133401	5.84502	5.06519e-09	6.49429e-08	DEG
ENSG00000105610.4	KLF1	protein_coding	49.1219	5.66603	0.798448	5.84387	5.10013e-09	6.53445e-08	DEG
ENSG00000158079.10	PTPDC1	protein_coding	671.067	2.17103	0.20054	5.83939	5.23908e-09	6.70773e-08	DEG
ENSG00000148459.11	PDSS1	protein_coding	791.306	1.98771	0.169358	5.83208	5.47417e-09	7.00376e-08	DEG
ENSG00000188559.9	RALGAPA2	protein_coding	740.768	2.29986	0.222891	5.83183	5.48241e-09	7.00935e-08	DEG
ENSG00000064205.6	WISP2	protein_coding	87.7812	-3.99197	0.513057	-5.83166	5.48794e-09	7.01146e-08	DEG
ENSG00000237330.2	RNF223	protein_coding	48.9751	5.65818	0.799015	5.8299	5.5459e-09	7.08051e-08	DEG
ENSG00000073008.10	PVR	protein_coding	9036.58	1.47499	0.0814847	5.82918	5.57004e-09	7.10632e-08	DEG
ENSG00000095203.10	EPB41L4B	protein_coding	386.997	2.3872	0.238125	5.82554	5.69275e-09	7.25775e-08	DEG
ENSG00000177469.12	PTRF	protein_coding	6428.63	-1.74155	0.127297	-5.82539	5.69809e-09	7.25944e-08	DEG
ENSG00000241360.1	PDXP	protein_coding	2390.61	1.74904	0.128643	5.82259	5.79422e-09	7.37673e-08	DEG
ENSG00000246350.1	RP5-1186N24.3	processed_transcript	196.304	2.91686	0.329221	5.8224	5.8007e-09	7.37978e-08	DEG
ENSG00000115718.13	PROC	protein_coding	48.0427	5.64755	0.798647	5.81927	5.91037e-09	7.51402e-08	DEG
ENSG00000165905.12	GYLTL1B	protein_coding	48.0176	5.64696	0.798689	5.81824	5.94705e-09	7.55535e-08	DEG
ENSG00000184232.4	OAF	protein_coding	3454.55	-1.69136	0.118892	-5.81504	6.062e-09	7.69597e-08	DEG
ENSG00000185272.9	RBM11	protein_coding	47.8428	5.64085	0.79903	5.8081	6.31839e-09	8.01585e-08	DEG
ENSG00000104313.13	EYA1	protein_coding	286.521	-2.58963	0.274158	-5.79823	6.70192e-09	8.49645e-08	DEG
ENSG00000168389.13	MFSD2A	protein_coding	865.505	4.0636	0.528684	5.79476	6.84172e-09	8.66762e-08	DEG
ENSG00000269289.1	CTB-92J24.3	antisense	86.2337	-4.17218	0.547615	-5.79272	6.92547e-09	8.76758e-08	DEG
ENSG00000179314.9	WSCD1	protein_coding	174.757	4.16701	0.546871	5.79115	6.99082e-09	8.84412e-08	DEG
ENSG00000104892.12	KLC3	protein_coding	59.9953	5.01192	0.693486	5.78515	7.24465e-09	9.15884e-08	DEG
ENSG00000204481.6	PRAMEF14	protein_coding	49.3815	5.63647	0.801942	5.78156	7.40128e-09	9.35032e-08	DEG
ENSG00000166825.9	ANPEP	protein_coding	9011.35	-1.50937	0.0881722	-5.77704	7.60284e-09	9.59825e-08	DEG
ENSG00000168496.3	FEN1	protein_coding	2416.99	1.67482	0.116941	5.77061	7.8985e-09	9.96456e-08	DEG
ENSG00000180667.6	YOD1	protein_coding	2714.24	1.65634	0.113747	5.77019	7.91831e-09	9.98258e-08	DEG
ENSG00000136275.6	C7orf69	protein_coding	48.8729	-5.36162	0.756247	-5.76746	8.04749e-09	1.01351e-07	DEG
ENSG00000174099.6	MSRB3	protein_coding	11639.1	-1.6342	0.109963	-5.7674	8.05046e-09	1.01351e-07	DEG
ENSG00000159217.5	IGF2BP1	protein_coding	404.109	2.46549	0.25414	5.76647	8.09496e-09	1.0184e-07	DEG
ENSG00000104290.6	FZD3	protein_coding	850.739	3.92405	0.507716	5.75922	8.45027e-09	1.06236e-07	DEG
ENSG00000026950.12	BTN3A1	protein_coding	1407.87	-1.75043	0.130379	-5.75575	8.62589e-09	1.08369e-07	DEG
ENSG00000183734.4	ASCL2	protein_coding	46.647	5.6025	0.801123	5.74507	9.18857e-09	1.15358e-07	DEG
ENSG00000172818.5	OVOL1	protein_coding	46.9886	5.60218	0.801743	5.74021	9.45589e-09	1.18631e-07	DEG
ENSG00000125850.6	OVOL2	protein_coding	46.7852	5.60066	0.801535	5.73982	9.47786e-09	1.18825e-07	DEG
ENSG00000108960.3	MMD	protein_coding	2240.5	1.69149	0.120508	5.73811	9.57408e-09	1.19948e-07	DEG
ENSG00000146411.5	SLC2A12	protein_coding	585.495	-2.35639	0.236419	-5.73725	9.62255e-09	1.20472e-07	DEG
ENSG00000272888.1	AC013394.2	processed_transcript	1435.91	-1.75397	0.13142	-5.73712	9.62974e-09	1.20478e-07	DEG
ENSG00000197183.8	C20orf112	protein_coding	546.65	2.38604	0.241615	5.73656	9.66165e-09	1.20794e-07	DEG
ENSG00000072954.2	TMEM38A	protein_coding	289.218	2.85166	0.323004	5.73262	9.88915e-09	1.23553e-07	DEG
ENSG00000128645.11	HOXD1	protein_coding	53.6777	5.12129	0.719304	5.72955	1.00699e-08	1.25724e-07	DEG
ENSG00000153814.7	JAZF1	protein_coding	767.359	-1.97903	0.170913	-5.72825	1.01475e-08	1.26606e-07	DEG
ENSG00000141524.11	TMC6	protein_coding	271.414	3.29017	0.399922	5.72654	1.02499e-08	1.27795e-07	DEG
ENSG00000132622.6	HSPA12B	protein_coding	128.264	3.63009	0.459382	5.72528	1.03266e-08	1.28663e-07	DEG
ENSG00000105971.10	CAV2	protein_coding	3550.25	-1.57098	0.099774	-5.72271	1.04836e-08	1.30529e-07	DEG
ENSG00000204510.1	PRAMEF7	protein_coding	46.7147	5.59036	0.802612	5.71928	1.06979e-08	1.33105e-07	DEG
ENSG00000196074.8	SYCP2	protein_coding	416.2	2.47305	0.257678	5.71664	1.08649e-08	1.35091e-07	DEG
ENSG00000130176.3	CNN1	protein_coding	6570.45	-1.50031	0.0875267	-5.71612	1.08981e-08	1.35411e-07	DEG
ENSG00000125878.4	TCF15	protein_coding	46.3085	5.58376	0.802555	5.71146	1.12014e-08	1.39083e-07	DEG
ENSG00000170293.4	CMTM8	protein_coding	107.031	3.75928	0.483596	5.70576	1.15824e-08	1.43618e-07	DEG
ENSG00000248429.1	RP11-597D13.9	antisense	69.8673	-4.53436	0.619436	-5.70576	1.15825e-08	1.43618e-07	DEG
ENSG00000256616.2	RP11-815J4.6	pseudogene	130.619	-3.31656	0.406038	-5.70528	1.16153e-08	1.43926e-07	DEG
ENSG00000177606.5	JUN	protein_coding	4230.96	-1.51887	0.0911654	-5.69157	1.25878e-08	1.55869e-07	DEG
ENSG00000119636.11	CCDC176	protein_coding	316.41	-2.46349	0.25742	-5.68521	1.30648e-08	1.61666e-07	DEG
ENSG00000196405.8	EVL	protein_coding	743.739	-2.02629	0.180802	-5.67631	1.37631e-08	1.7019e-07	DEG
ENSG00000270113.1	RP11-282O18.6	lincRNA	45.5207	5.55706	0.80403	5.66778	1.44661e-08	1.78762e-07	DEG
ENSG00000090932.6	DLL3	protein_coding	332.368	2.47977	0.261186	5.66557	1.46534e-08	1.80951e-07	DEG
ENSG00000135452.5	TSPAN31	protein_coding	1107.62	-1.82975	0.146609	-5.65963	1.51699e-08	1.87202e-07	DEG
ENSG00000166897.10	ELFN2	protein_coding	268.639	-2.58084	0.279371	-5.65858	1.52632e-08	1.88225e-07	DEG
ENSG00000180769.4	WDFY3-AS2	processed_transcript	179.514	-2.91765	0.339072	-5.65559	1.55316e-08	1.91405e-07	DEG
ENSG00000144785.4	RP11-977G19.10	protein_coding	245.042	3.22357	0.393205	5.65498	1.5586e-08	1.91945e-07	DEG
ENSG00000008441.12	NFIX	protein_coding	1003.47	-1.94648	0.167405	-5.65382	1.56922e-08	1.93121e-07	DEG
ENSG00000151962.3	RBM46	protein_coding	44.9795	5.54579	0.804302	5.65185	1.58732e-08	1.95215e-07	DEG
ENSG00000172638.8	EFEMP2	protein_coding	1307.89	-1.9673	0.171256	-5.6483	1.6204e-08	1.99047e-07	DEG
ENSG00000233421.3	U1	lincRNA	51.6817	5.07336	0.721169	5.64827	1.62067e-08	1.99047e-07	DEG
ENSG00000134363.7	FST	protein_coding	1229.66	-1.85388	0.151191	-5.64767	1.62634e-08	1.99607e-07	DEG
ENSG00000198959.7	TGM2	protein_coding	6120.68	-1.56264	0.0997985	-5.63779	1.72245e-08	2.1126e-07	DEG
ENSG00000111181.8	SLC6A12	protein_coding	45.4666	5.54094	0.805571	5.63693	1.73111e-08	2.12178e-07	DEG
ENSG00000112312.5	GMNN	protein_coding	2858.07	1.76182	0.135155	5.63666	1.73377e-08	2.12361e-07	DEG
ENSG00000234546.2	RP3-510D11.2	lincRNA	142.539	-3.13912	0.38015	-5.62704	1.83326e-08	2.24395e-07	DEG
ENSG00000116726.4	PRAMEF12	protein_coding	44.3247	5.51924	0.805965	5.60724	2.05577e-08	2.5146e-07	DEG
ENSG00000186318.12	BACE1	protein_coding	3934.32	-1.56763	0.101261	-5.60562	2.07505e-08	2.53647e-07	DEG
ENSG00000156486.7	KCNS2	protein_coding	74.6092	-4.30658	0.590175	-5.60272	2.11012e-08	2.5776e-07	DEG
ENSG00000235649.2	MXRA5P1	pseudogene	52.3406	-5.10371	0.733087	-5.59785	2.17031e-08	2.64933e-07	DEG
ENSG00000138944.7	KIAA1644	protein_coding	617.072	2.08474	0.193858	5.59553	2.19952e-08	2.68318e-07	DEG
ENSG00000140254.8	DUOXA1	protein_coding	68.0047	4.36312	0.601882	5.58768	2.30122e-08	2.80534e-07	DEG
ENSG00000175318.7	GRAMD2	protein_coding	78.8183	4.24772	0.581362	5.58641	2.31817e-08	2.82411e-07	DEG
ENSG00000156869.8	FRRS1	protein_coding	1015.95	-1.88779	0.158971	-5.58462	2.34211e-08	2.85136e-07	DEG
ENSG00000113645.9	WWC1	protein_coding	65.9635	4.52999	0.632241	5.58329	2.36004e-08	2.8674e-07	DEG
ENSG00000127903.12	ZNF835	protein_coding	43.7993	5.50395	0.806666	5.58341	2.35847e-08	2.8674e-07	DEG
ENSG00000170734.7	POLH	protein_coding	1419.69	-1.72134	0.129192	-5.58343	2.35817e-08	2.8674e-07	DEG
ENSG00000085563.10	ABCB1	protein_coding	85.0558	4.16649	0.567383	5.58086	2.39332e-08	2.90587e-07	DEG
ENSG00000169418.9	NPR1	protein_coding	67.2101	4.69364	0.661971	5.57976	2.40857e-08	2.92244e-07	DEG
ENSG00000070010.14	UFD1L	protein_coding	2464.38	1.61702	0.110599	5.5789	2.42048e-08	2.93492e-07	DEG
ENSG00000154678.12	PDE1C	protein_coding	1224.81	-1.83482	0.149846	-5.57119	2.53005e-08	3.06571e-07	DEG
ENSG00000166401.9	SERPINB8	protein_coding	1878.45	1.65572	0.117796	5.56653	2.59861e-08	3.14543e-07	DEG
ENSG00000213977.3	TAX1BP3	protein_coding	12954.2	-1.40353	0.0724948	-5.56637	2.60105e-08	3.14543e-07	DEG
ENSG00000240583.6	AQP1	protein_coding	415.239	2.29423	0.232509	5.56638	2.60092e-08	3.14543e-07	DEG
ENSG00000149599.11	DUSP15	protein_coding	44.7647	5.50035	0.808669	5.56514	2.61949e-08	3.16561e-07	DEG
ENSG00000123572.12	NRK	protein_coding	43.8788	5.4951	0.807749	5.56497	2.62202e-08	3.16655e-07	DEG
ENSG00000182326.10	C1S	protein_coding	5099.7	-2.60665	0.288912	-5.56103	2.68185e-08	3.23664e-07	DEG
ENSG00000176399.3	DMRTA1	protein_coding	107.083	3.67964	0.48195	5.56	2.69777e-08	3.25369e-07	DEG
ENSG00000196616.8	ADH1B	protein_coding	41.2914	-5.49895	0.809593	-5.55705	2.74376e-08	3.30695e-07	DEG
ENSG00000107719.8	PALD1	protein_coding	43.3339	5.48664	0.807667	5.55507	2.77507e-08	3.34246e-07	DEG
ENSG00000159176.9	CSRP1	protein_coding	20556.7	-1.45516	0.0819596	-5.55342	2.80134e-08	3.37186e-07	DEG
ENSG00000167513.4	CDT1	protein_coding	643.544	2.07239	0.193491	5.54235	2.9844e-08	3.58981e-07	DEG
ENSG00000145990.6	GFOD1	protein_coding	915.462	1.9297	0.167754	5.54201	2.99019e-08	3.59439e-07	DEG
ENSG00000204175.4	GPRIN2	protein_coding	43.5578	5.47259	0.809497	5.52515	3.29204e-08	3.95461e-07	DEG
ENSG00000118432.11	CNR1	protein_coding	43.2857	5.47102	0.809332	5.52434	3.30731e-08	3.97031e-07	DEG
ENSG00000140470.9	ADAMTS17	protein_coding	42.8605	5.46782	0.808804	5.52398	3.31401e-08	3.97571e-07	DEG
ENSG00000180921.6	FAM83H	protein_coding	523.397	2.16384	0.210975	5.51649	3.45833e-08	4.1461e-07	DEG
ENSG00000157470.7	FAM81A	protein_coding	208.155	2.82199	0.330469	5.51336	3.52056e-08	4.21791e-07	DEG
ENSG00000188816.3	HMX2	protein_coding	50.3028	5.01871	0.729107	5.51182	3.55146e-08	4.25211e-07	DEG
ENSG00000204950.2	LRRC10B	protein_coding	54.3742	4.86925	0.70212	5.5108	3.57201e-08	4.27389e-07	DEG
ENSG00000147676.9	MAL2	protein_coding	86.0059	3.83553	0.514877	5.5072	3.64594e-08	4.35947e-07	DEG
ENSG00000006453.9	BAIAP2L1	protein_coding	1019.02	2.10376	0.200626	5.50156	3.76445e-08	4.49819e-07	DEG
ENSG00000111348.4	ARHGDIB	protein_coding	51.3358	-4.68083	0.669098	-5.50118	3.7725e-08	4.50484e-07	DEG
ENSG00000116852.10	KIF21B	protein_coding	89.2537	3.92911	0.532474	5.50095	3.77751e-08	4.50784e-07	DEG
ENSG00000106546.8	AHR	protein_coding	8575.55	-1.65179	0.118598	-5.49579	3.88965e-08	4.6386e-07	DEG
ENSG00000171649.7	ZIK1	protein_coding	987.896	1.82353	0.149912	5.49344	3.94178e-08	4.69767e-07	DEG
ENSG00000131374.10	TBC1D5	protein_coding	5421.95	-1.50638	0.0923667	-5.48231	4.1981e-08	4.99986e-07	DEG
ENSG00000204397.3	CARD16	protein_coding	96.8665	-3.70708	0.494784	-5.47123	4.46912e-08	5.31913e-07	DEG
ENSG00000159840.11	ZYX	protein_coding	2011.76	-1.68191	0.124741	-5.46664	4.58657e-08	5.45534e-07	DEG
ENSG00000164438.5	TLX3	protein_coding	42.0122	5.43178	0.811071	5.46411	4.65237e-08	5.52997e-07	DEG
ENSG00000172115.4	CYCS	protein_coding	8568.45	1.44539	0.0815407	5.46217	4.70345e-08	5.587e-07	DEG
ENSG00000050030.9	KIAA2022	protein_coding	42.1951	5.43152	0.811428	5.46138	4.7245e-08	5.60833e-07	DEG
ENSG00000118849.5	RARRES1	protein_coding	372.575	-2.40483	0.257478	-5.45609	4.86722e-08	5.77396e-07	DEG
ENSG00000090539.11	CHRD	protein_coding	591.138	2.12216	0.205716	5.45492	4.89946e-08	5.8084e-07	DEG
ENSG00000204449.2	TRIM49C	protein_coding	41.981	5.42645	0.811545	5.45435	4.91517e-08	5.82321e-07	DEG
ENSG00000244414.2	CFHR1	protein_coding	50.187	-5.02837	0.738702	-5.45331	4.94401e-08	5.85354e-07	DEG
ENSG00000175376.4	EIF1AD	protein_coding	1796.97	1.64379	0.11808	5.45215	4.97638e-08	5.88801e-07	DEG
ENSG00000198477.3	ZNF280B	protein_coding	355.449	2.42863	0.26207	5.45132	4.99982e-08	5.91187e-07	DEG
ENSG00000136944.13	LMX1B	protein_coding	42.9069	5.42919	0.812683	5.45009	5.03442e-08	5.94891e-07	DEG
ENSG00000235961.3	PNMA6C	protein_coding	447.889	2.17472	0.215619	5.44814	5.09006e-08	6.01073e-07	DEG
ENSG00000188641.8	DPYD	protein_coding	3389.78	-1.60043	0.110311	-5.44307	5.23698e-08	6.18019e-07	DEG
ENSG00000175215.5	CTDSP2	protein_coding	7144.88	-1.46207	0.0849961	-5.43637	5.4377e-08	6.41287e-07	DEG
ENSG00000135083.10	CCNJL	protein_coding	231.051	2.6296	0.299806	5.4355	5.46427e-08	6.44e-07	DEG
ENSG00000184347.10	SLIT3	protein_coding	714.072	-2.03744	0.190994	-5.43179	5.57924e-08	6.57123e-07	DEG
ENSG00000198088.6	NUP62CL	protein_coding	42.407	5.18211	0.770006	5.43127	5.59536e-08	6.58592e-07	DEG
ENSG00000198028.3	ZNF560	protein_coding	325.299	2.43615	0.264443	5.43086	5.60819e-08	6.59674e-07	DEG
ENSG00000168398.5	BDKRB2	protein_coding	1419.03	-2.03011	0.189924	-5.42379	5.8347e-08	6.85871e-07	DEG
ENSG00000140807.4	NKD1	protein_coding	41.0713	5.39944	0.812738	5.41311	6.194e-08	7.27634e-07	DEG
ENSG00000178882.9	FAM101A	protein_coding	120.033	3.46273	0.455133	5.41102	6.26685e-08	7.35714e-07	DEG
ENSG00000063854.8	HAGH	protein_coding	746.841	2.0498	0.194059	5.40967	6.31396e-08	7.40764e-07	DEG
ENSG00000173068.13	BNC2	protein_coding	2527.12	-1.72548	0.134127	-5.40891	6.3408e-08	7.43431e-07	DEG
ENSG00000138674.12	SEC31A	protein_coding	19285.8	-1.39843	0.0736884	-5.40701	6.40873e-08	7.50908e-07	DEG
ENSG00000015133.14	CCDC88C	protein_coding	49.2248	4.80761	0.705599	5.39629	6.80337e-08	7.96633e-07	DEG
ENSG00000145476.11	CYP4V2	protein_coding	1515.19	-1.69802	0.129511	-5.38965	7.05941e-08	8.26079e-07	DEG
ENSG00000110074.6	FOXRED1	protein_coding	2741.41	1.55347	0.10273	5.38757	7.14177e-08	8.35176e-07	DEG
ENSG00000163633.6	C4orf36	protein_coding	433.727	-2.23337	0.229091	-5.38376	7.2944e-08	8.52474e-07	DEG
ENSG00000184986.6	TMEM121	protein_coding	914.503	2.0179	0.189085	5.38331	7.31284e-08	8.54077e-07	DEG
ENSG00000109265.8	KIAA1211	protein_coding	82.0305	4.16554	0.588823	5.37604	7.61439e-08	8.88722e-07	DEG
ENSG00000122694.11	GLIPR2	protein_coding	2966.87	-1.56464	0.105033	-5.37581	7.62381e-08	8.89248e-07	DEG
ENSG00000108187.11	PBLD	protein_coding	381.326	-2.38839	0.258276	-5.37561	7.63222e-08	8.89655e-07	DEG
ENSG00000013293.5	SLC7A14	protein_coding	156.844	-3.02899	0.378068	-5.36675	8.01686e-08	9.33889e-07	DEG
ENSG00000267041.1	ZNF850	protein_coding	165.01	2.78506	0.332665	5.36594	8.05273e-08	9.37464e-07	DEG
ENSG00000116544.7	DLGAP3	protein_coding	59.0782	4.66332	0.682896	5.36438	8.12257e-08	9.4438e-07	DEG
ENSG00000143375.10	CGN	protein_coding	46.0016	5.10498	0.765216	5.36447	8.11879e-08	9.4438e-07	DEG
ENSG00000107554.11	DNMBP	protein_coding	1751.84	-1.63854	0.119052	-5.36357	8.15909e-08	9.48016e-07	DEG
ENSG00000108671.5	PSMD11	protein_coding	2262.4	1.66376	0.123772	5.36275	8.19666e-08	9.5177e-07	DEG
ENSG00000186223.4	SSU72P4	pseudogene	40.5905	5.36765	0.815147	5.35812	8.40938e-08	9.75844e-07	DEG
ENSG00000007264.9	MATK	protein_coding	40.9522	5.36862	0.81565	5.356	8.50863e-08	9.86728e-07	DEG
ENSG00000073711.6	PPP2R3A	protein_coding	3309.27	-1.619	0.115703	-5.34994	8.79858e-08	1.0197e-06	DEG
ENSG00000156968.8	MPV17L	protein_coding	171.786	2.84993	0.346092	5.3452	9.0319e-08	1.04607e-06	DEG
ENSG00000196205.7	EEF1A1P5	pseudogene	5675.52	-1.48272	0.0903394	-5.34343	9.12054e-08	1.05566e-06	DEG
ENSG00000189339.7	SLC35E2B	protein_coding	3184.11	-1.5271	0.0987018	-5.34031	9.27893e-08	1.07331e-06	DEG
ENSG00000185483.7	ROR1	protein_coding	1798.16	-1.63416	0.118798	-5.33813	9.39104e-08	1.08558e-06	DEG
ENSG00000161921.10	CXCL16	protein_coding	174.439	3.0056	0.375796	5.33694	9.45268e-08	1.09201e-06	DEG
ENSG00000075340.18	ADD2	protein_coding	40.8137	5.35747	0.816492	5.33682	9.45908e-08	1.09205e-06	DEG
ENSG00000121361.3	KCNJ8	protein_coding	407.376	-2.18811	0.222787	-5.33295	9.66321e-08	1.11491e-06	DEG
ENSG00000171408.9	PDE7B	protein_coding	166.962	-3.4048	0.451083	-5.33116	9.75882e-08	1.12522e-06	DEG
ENSG00000153208.12	MERTK	protein_coding	90.0164	4.18122	0.59683	5.3302	9.81046e-08	1.13045e-06	DEG
ENSG00000172380.5	GNG12	protein_coding	23449.5	-1.36994	0.0694187	-5.32909	9.87043e-08	1.13664e-06	DEG
ENSG00000115009.7	CCL20	protein_coding	39.6756	5.34625	0.815677	5.32839	9.90857e-08	1.1403e-06	DEG
ENSG00000073910.15	FRY	protein_coding	3123.99	-1.62577	0.117648	-5.31903	1.04324e-07	1.19983e-06	DEG
ENSG00000148344.10	PTGES	protein_coding	902.399	1.95321	0.179252	5.31773	1.05068e-07	1.20761e-06	DEG
ENSG00000130402.7	ACTN4	protein_coding	5204.11	-1.6795	0.128307	-5.29589	1.18439e-07	1.36043e-06	DEG
ENSG00000261069.2	SNORD116-20	lincRNA	867.6	1.86412	0.163423	5.28766	1.23892e-07	1.42216e-06	DEG
ENSG00000175445.10	LPL	protein_coding	52.4385	4.75325	0.709863	5.28729	1.24141e-07	1.42412e-06	DEG
ENSG00000048342.11	CC2D2A	protein_coding	868.467	-1.83258	0.157541	-5.28488	1.25786e-07	1.44208e-06	DEG
ENSG00000108846.11	ABCC3	protein_coding	412.866	-2.49821	0.283612	-5.2826	1.27367e-07	1.45927e-06	DEG
ENSG00000178053.13	MLF1	protein_coding	1798.21	1.62625	0.11863	5.27902	1.29876e-07	1.48708e-06	DEG
ENSG00000141452.5	C18orf8	protein_coding	1727.3	1.81026	0.153518	5.27794	1.30644e-07	1.49492e-06	DEG
ENSG00000182796.8	TMEM198B	pseudogene	303.131	-2.47179	0.278949	-5.2762	1.31893e-07	1.50826e-06	DEG
ENSG00000236013.1	RP3-332B22.1	lincRNA	47.5818	-5.05637	0.769005	-5.27483	1.3288e-07	1.51859e-06	DEG
ENSG00000267257.1	RP11-1151B14.4	antisense	64.9718	-4.0441	0.577207	-5.27385	1.33592e-07	1.52577e-06	DEG
ENSG00000123353.5	ORMDL2	protein_coding	3144.31	1.69795	0.132499	5.26755	1.38257e-07	1.57805e-06	DEG
ENSG00000017427.11	IGF1	protein_coding	38.2618	-5.11363	0.781256	-5.2654	1.39884e-07	1.59562e-06	DEG
ENSG00000099849.10	RASSF7	protein_coding	1071.25	1.78002	0.148208	5.26303	1.41702e-07	1.61533e-06	DEG
ENSG00000064547.9	LPAR2	protein_coding	158.756	2.9363	0.36809	5.26038	1.43758e-07	1.63774e-06	DEG
ENSG00000138172.6	CALHM2	protein_coding	1635.8	-1.77197	0.146797	-5.25875	1.45035e-07	1.65125e-06	DEG
ENSG00000166863.7	TAC3	protein_coding	38.5418	5.30199	0.8181	5.25851	1.45225e-07	1.65237e-06	DEG
ENSG00000158106.8	RHPN1	protein_coding	126.769	3.18082	0.414761	5.25801	1.45621e-07	1.65583e-06	DEG
ENSG00000117748.5	RPA2	protein_coding	3721.79	1.49634	0.0944848	5.2531	1.49564e-07	1.6996e-06	DEG
ENSG00000107443.11	CCNJ	protein_coding	627.607	2.1834	0.225316	5.25219	1.503e-07	1.70689e-06	DEG
ENSG00000171130.13	ATP6V0E2	protein_coding	2442.6	1.57052	0.108725	5.24737	1.54288e-07	1.75108e-06	DEG
ENSG00000103152.7	MPG	protein_coding	6724.02	-1.51937	0.099005	-5.24586	1.55552e-07	1.76432e-06	DEG
ENSG00000197020.6	ZNF100	protein_coding	794.607	1.99946	0.190598	5.24381	1.57293e-07	1.78295e-06	DEG
ENSG00000260910.1	LINC00565	lincRNA	131.132	-3.21544	0.422497	-5.24369	1.57401e-07	1.78305e-06	DEG
ENSG00000143320.4	CRABP2	protein_coding	528.645	-2.08454	0.206882	-5.24234	1.58553e-07	1.79498e-06	DEG
ENSG00000223802.3	CERS1	protein_coding	136.946	2.99015	0.380118	5.2356	1.64451e-07	1.86059e-06	DEG
ENSG00000156587.11	UBE2L6	protein_coding	803.573	-1.87859	0.168272	-5.22127	1.77696e-07	2.00919e-06	DEG
ENSG00000119698.7	PPP4R4	protein_coding	385.427	2.33506	0.255728	5.22064	1.78307e-07	2.01484e-06	DEG
ENSG00000145569.5	FAM105A	protein_coding	706.339	1.90071	0.172579	5.21913	1.79766e-07	2.03005e-06	DEG
ENSG00000139266.5	MARCH9	protein_coding	754.429	1.90179	0.17283	5.21777	1.81088e-07	2.0437e-06	DEG
ENSG00000112218.7	GPR63	protein_coding	88.5479	3.58683	0.495872	5.21674	1.82099e-07	2.05384e-06	DEG
ENSG00000171119.2	NRTN	protein_coding	71.0305	3.88914	0.554325	5.212	1.86816e-07	2.10573e-06	DEG
ENSG00000169242.7	EFNA1	protein_coding	37.8888	5.27135	0.819978	5.2091	1.89754e-07	2.13751e-06	DEG
ENSG00000245694.4	CRNDE	lincRNA	901.349	-1.89039	0.170972	-5.20779	1.91105e-07	2.15139e-06	DEG
ENSG00000152402.6	GUCY1A2	protein_coding	3000.72	-3.57442	0.494985	-5.20101	1.98212e-07	2.23001e-06	DEG
ENSG00000133083.10	DCLK1	protein_coding	840.324	-1.84032	0.161574	-5.20085	1.98382e-07	2.23054e-06	DEG
ENSG00000134769.17	DTNA	protein_coding	426.746	2.33417	0.256541	5.20061	1.98636e-07	2.23201e-06	DEG
ENSG00000113722.12	CDX1	protein_coding	39.5682	-5.04295	0.777658	-5.19888	2.00496e-07	2.2515e-06	DEG
ENSG00000164292.8	RHOBTB3	protein_coding	6358.11	-1.4539	0.0873134	-5.19854	2.00862e-07	2.25421e-06	DEG
UL148C	UL148C	CMV	37.5694	5.26177	0.820367	5.19496	2.04763e-07	2.29657e-06	DEG
ENSG00000102452.11	NALCN	protein_coding	109.274	3.32084	0.447504	5.18619	2.14636e-07	2.40582e-06	DEG
ENSG00000167123.14	CERCAM	protein_coding	6305.19	-1.41858	0.0807142	-5.18591	2.14968e-07	2.40804e-06	DEG
ENSG00000184489.7	PTP4A3	protein_coding	273.225	2.4171	0.273406	5.18313	2.18196e-07	2.44269e-06	DEG
ENSG00000109062.5	SLC9A3R1	protein_coding	1921.74	1.66645	0.128588	5.18287	2.18492e-07	2.44449e-06	DEG
ENSG00000228549.2	U1	lincRNA	62.3869	4.09711	0.597616	5.18244	2.19007e-07	2.44873e-06	DEG
ENSG00000139800.8	ZIC5	protein_coding	37.6818	5.25572	0.821204	5.1823	2.19167e-07	2.44901e-06	DEG
ENSG00000136859.5	ANGPTL2	protein_coding	794	-1.99873	0.192804	-5.18003	2.21846e-07	2.47741e-06	DEG
ENSG00000072840.8	EVC	protein_coding	1451.18	-1.70876	0.136853	-5.17897	2.23116e-07	2.49007e-06	DEG
ENSG00000185519.8	FAM131C	protein_coding	115.753	3.177	0.420424	5.1781	2.24155e-07	2.50012e-06	DEG
ENSG00000116005.7	PCYOX1	protein_coding	4624.42	-1.46775	0.0904092	-5.1737	2.29507e-07	2.55823e-06	DEG
ENSG00000198339.3	HIST1H4I	protein_coding	1501.21	-1.835	0.1614	-5.17347	2.2978e-07	2.5597e-06	DEG
ENSG00000258498.2	DIO3OS	lincRNA	55.9173	-4.15323	0.609796	-5.17096	2.32899e-07	2.59285e-06	DEG
ENSG00000188290.6	HES4	protein_coding	1967.54	1.74526	0.144175	5.16914	2.35172e-07	2.61654e-06	DEG
ENSG00000173698.13	GPR64	protein_coding	37.4751	5.24679	0.821714	5.16821	2.36344e-07	2.62796e-06	DEG
ENSG00000157765.7	SLC34A2	protein_coding	37.1374	5.24345	0.821415	5.16603	2.39118e-07	2.65717e-06	DEG
ENSG00000187672.8	ERC2	protein_coding	71.3234	4.18008	0.615976	5.16267	2.4345e-07	2.70365e-06	DEG
ENSG00000106025.4	TSPAN12	protein_coding	108.569	3.28793	0.443797	5.15535	2.53156e-07	2.80972e-06	DEG
ENSG00000196208.9	GREB1	protein_coding	37.2889	5.23784	0.822195	5.1543	2.54576e-07	2.82375e-06	DEG
ENSG00000167447.8	SMG8	protein_coding	4943.81	1.47163	0.0915139	5.15367	2.5544e-07	2.83159e-06	DEG
ENSG00000139269.2	INHBE	protein_coding	418.039	-2.5052	0.292295	-5.1496	2.61037e-07	2.89187e-06	DEG
ENSG00000145220.9	LYAR	protein_coding	613.99	1.96897	0.18837	5.144	2.68955e-07	2.97776e-06	DEG
ENSG00000237187.4	NR2F1-AS1	processed_transcript	743.161	-1.90803	0.176717	-5.13832	2.77212e-07	3.0673e-06	DEG
ENSG00000113811.6	SELK	protein_coding	3807.12	1.57725	0.112382	5.13646	2.79955e-07	3.09576e-06	DEG
ENSG00000181856.10	SLC2A4	protein_coding	53.8917	4.55826	0.692839	5.13577	2.80987e-07	3.10527e-06	DEG
ENSG00000115297.9	TLX2	protein_coding	40.2771	4.99157	0.777324	5.13502	2.82113e-07	3.11582e-06	DEG
ENSG00000156802.8	ATAD2	protein_coding	7261.37	1.4352	0.0847616	5.13442	2.83022e-07	3.12395e-06	DEG
ENSG00000179542.11	SLITRK4	protein_coding	38.7453	5.23406	0.825081	5.13168	2.87163e-07	3.16772e-06	DEG
ENSG00000168267.5	PTF1A	protein_coding	36.769	5.22225	0.82285	5.13125	2.87825e-07	3.17309e-06	DEG
ENSG00000229292.1	RFPL4AL1	protein_coding	36.6152	5.22082	0.82269	5.13051	2.88962e-07	3.18369e-06	DEG
ENSG00000151623.10	NR3C2	protein_coding	133.001	3.04855	0.399696	5.12528	2.9709e-07	3.27124e-06	DEG
ENSG00000198417.5	MT1F	protein_coding	53.6064	4.55957	0.695343	5.11916	3.069e-07	3.37721e-06	DEG
ENSG00000160223.12	ICOSLG	protein_coding	255.485	2.47525	0.28823	5.1183	3.08307e-07	3.39063e-06	DEG
ENSG00000152315.4	KCNK13	protein_coding	53.891	4.55422	0.694574	5.11712	3.10235e-07	3.40976e-06	DEG
ENSG00000106789.8	CORO2A	protein_coding	276.217	2.38794	0.271506	5.11199	3.18782e-07	3.50157e-06	DEG
ENSG00000184613.6	NELL2	protein_coding	59.8417	4.45849	0.677008	5.1085	3.24724e-07	3.56467e-06	DEG
ENSG00000104783.7	KCNN4	protein_coding	72.5647	3.88902	0.565562	5.10822	3.25205e-07	3.56779e-06	DEG
ENSG00000164690.3	SHH	protein_coding	41.5625	5.03337	0.790455	5.10259	3.35031e-07	3.67336e-06	DEG
ENSG00000163377.10	FAM19A4	protein_coding	39.7285	5.22126	0.828001	5.09813	3.43023e-07	3.75871e-06	DEG
ENSG00000188883.4	KLRG2	protein_coding	36.1356	5.19941	0.823921	5.09686	3.45341e-07	3.78182e-06	DEG
ENSG00000215251.3	FASTKD5	protein_coding	2622.15	1.56131	0.110138	5.09643	3.46118e-07	3.78803e-06	DEG
ENSG00000168135.4	KCNJ4	protein_coding	36.2755	5.19861	0.824282	5.09366	3.51219e-07	3.84154e-06	DEG
ENSG00000171492.10	LRRC8D	protein_coding	2927.59	-1.54231	0.106499	-5.09213	3.54056e-07	3.87023e-06	DEG
ENSG00000154229.7	PRKCA	protein_coding	3196.17	-1.5506	0.108205	-5.08849	3.60926e-07	3.94294e-06	DEG
ENSG00000174951.6	FUT1	protein_coding	134.378	3.15086	0.42279	5.0873	3.63189e-07	3.96527e-06	DEG
ENSG00000214491.4	SEC14L6	protein_coding	42.7322	4.72057	0.731587	5.08562	3.66434e-07	3.99828e-06	DEG
ENSG00000131242.11	RAB11FIP4	protein_coding	116.682	4.15477	0.621303	5.07767	3.82096e-07	4.16667e-06	DEG
ENSG00000097046.8	CDC7	protein_coding	821.447	2.00066	0.197431	5.06841	4.01147e-07	4.37178e-06	DEG
ENSG00000153933.5	DGKE	protein_coding	1250.04	1.73037	0.14424	5.06358	4.11449e-07	4.48135e-06	DEG
ENSG00000089472.12	HEPH	protein_coding	214.532	-2.53067	0.302311	-5.06322	4.12226e-07	4.48712e-06	DEG
ENSG00000183856.6	IQGAP3	protein_coding	390.463	-2.33506	0.263732	-5.06218	4.14489e-07	4.50903e-06	DEG
ENSG00000183580.8	FBXL7	protein_coding	1396.18	-1.65589	0.129674	-5.05798	4.23718e-07	4.60665e-06	DEG
ENSG00000065361.10	ERBB3	protein_coding	267.381	2.48038	0.292848	5.05512	4.30131e-07	4.67357e-06	DEG
ENSG00000168685.10	IL7R	protein_coding	1157.72	-1.80438	0.159456	-5.04455	4.54592e-07	4.93639e-06	DEG
ENSG00000171723.11	GPHN	protein_coding	1345.74	1.69275	0.13741	5.04149	4.61914e-07	5.01289e-06	DEG
ENSG00000237807.3	RP11-400K9.4	lincRNA	44.3933	-4.6366	0.721478	-5.04049	4.64339e-07	5.03619e-06	DEG
ENSG00000263934.2	SNORD3A	lincRNA	2378.75	-1.70155	0.139205	-5.0397	4.66254e-07	5.05393e-06	DEG
ENSG00000171877.15	FRMD5	protein_coding	433.158	2.40264	0.2784	5.03823	4.69864e-07	5.09001e-06	DEG
ENSG00000184305.10	CCSER1	protein_coding	35.6008	5.16147	0.826687	5.03391	4.80578e-07	5.20295e-06	DEG
ENSG00000102109.7	PCSK1N	protein_coding	39.7441	4.93235	0.782118	5.02782	4.96094e-07	5.36773e-06	DEG
ENSG00000100106.15	TRIOBP	protein_coding	6197.43	-1.44693	0.0889013	-5.02728	4.97489e-07	5.3796e-06	DEG
ENSG00000168824.10	NSG1	protein_coding	86.7347	3.91456	0.580846	5.01778	5.22716e-07	5.64902e-06	DEG
ENSG00000153233.8	PTPRR	protein_coding	200.028	3.26239	0.451005	5.01634	5.26664e-07	5.68829e-06	DEG
ENSG00000077327.11	SPAG6	protein_coding	35.5505	5.15129	0.827574	5.01621	5.27008e-07	5.68861e-06	DEG
ENSG00000273038.1	RP11-479G22.8	lincRNA	128.7	-2.95676	0.390605	-5.00957	5.45527e-07	5.88499e-06	DEG
ENSG00000116161.13	CACYBP	protein_coding	6061.56	1.41932	0.0837297	5.00804	5.49865e-07	5.92472e-06	DEG
ENSG00000184357.3	HIST1H1B	protein_coding	11054.3	-1.47012	0.0938716	-5.00815	5.49558e-07	5.92472e-06	DEG
ENSG00000258839.2	MC1R	protein_coding	359.575	-2.21821	0.24326	-5.00782	5.50488e-07	5.9279e-06	DEG
ENSG00000130396.16	MLLT4	protein_coding	3275.24	1.71658	0.143191	5.00436	5.60477e-07	6.03188e-06	DEG
ENSG00000189253.7	TRIM64B	protein_coding	35.5758	5.1443	0.828306	5.00334	5.63442e-07	6.06018e-06	DEG
ENSG00000250305.4	KIAA1456	protein_coding	702.76	-2.08869	0.218061	-4.99258	5.95775e-07	6.40414e-06	DEG
ENSG00000067840.8	PDZD4	protein_coding	69.8045	4.03664	0.608289	4.9921	5.97267e-07	6.41636e-06	DEG
ENSG00000187838.12	TMEM256-PLSCR3	protein_coding	725.208	-1.98318	0.197142	-4.98719	6.12638e-07	6.57758e-06	DEG
ENSG00000156299.8	TIAM1	protein_coding	61.8193	4.32573	0.667129	4.98514	6.19159e-07	6.64366e-06	DEG
ENSG00000167779.3	IGFBP6	protein_coding	5416.32	-1.48925	0.098151	-4.98465	6.20734e-07	6.6566e-06	DEG
ENSG00000085063.10	CD59	protein_coding	29697.9	-1.33732	0.0676824	-4.98393	6.23058e-07	6.67757e-06	DEG
ENSG00000246273.2	SBF2-AS1	antisense	389.438	-2.56364	0.313977	-4.98009	6.35555e-07	6.80748e-06	DEG
ENSG00000161992.5	C16orf11	protein_coding	47.1343	4.58955	0.7208	4.97995	6.35993e-07	6.80814e-06	DEG
ENSG00000196532.4	HIST1H3C	protein_coding	3900.04	-1.59011	0.118809	-4.96691	6.80271e-07	7.27781e-06	DEG
ENSG00000151882.7	CCL28	protein_coding	249.913	2.43149	0.288224	4.96659	6.81403e-07	7.28561e-06	DEG
ENSG00000173482.12	PTPRM	protein_coding	2688.31	-1.54136	0.109125	-4.96087	7.01787e-07	7.49913e-06	DEG
ENSG00000187741.10	FANCA	protein_coding	1390.58	1.67837	0.136766	4.96005	7.04739e-07	7.52623e-06	DEG
ENSG00000152669.8	CCNO	protein_coding	34.2377	5.11119	0.829008	4.95917	7.07955e-07	7.55611e-06	DEG
ENSG00000259627.1	RP11-244F12.2	antisense	85.8553	-3.43045	0.490882	-4.95118	7.37635e-07	7.86825e-06	DEG
ENSG00000260833.2	AC124789.1	processed_transcript	365.789	-2.20434	0.243388	-4.94825	7.48846e-07	7.98313e-06	DEG
ENSG00000156876.8	SASS6	protein_coding	1580.8	1.66996	0.135422	4.94721	7.52845e-07	8.02104e-06	DEG
ENSG00000087842.6	PIR	protein_coding	255.196	-2.38522	0.28047	-4.93892	7.8555e-07	8.36456e-06	DEG
ENSG00000150995.13	ITPR1	protein_coding	541.359	2.13934	0.230776	4.93701	7.93299e-07	8.4421e-06	DEG
ENSG00000182220.9	ATP6AP2	protein_coding	14477.6	-1.369	0.0747628	-4.93566	7.98805e-07	8.49569e-06	DEG
ENSG00000197444.5	OGDHL	protein_coding	38.8424	4.88556	0.787293	4.93534	8.00125e-07	8.50474e-06	DEG
ENSG00000171488.10	LRRC8C	protein_coding	2532.95	1.52992	0.107388	4.93467	8.02875e-07	8.52896e-06	DEG
ENSG00000162390.13	ACOT11	protein_coding	223.561	2.46543	0.297205	4.93072	8.19279e-07	8.69811e-06	DEG
ENSG00000137713.11	PPP2R1B	protein_coding	3916.45	1.45736	0.092792	4.92884	8.2718e-07	8.77684e-06	DEG
ENSG00000215039.2	CD27-AS1	antisense	727.286	-1.85772	0.17405	-4.92802	8.30687e-07	8.80888e-06	DEG
ENSG00000165025.10	SYK	protein_coding	34.3896	5.09333	0.831034	4.92558	8.41083e-07	8.91391e-06	DEG
ENSG00000189320.4	FAM180A	protein_coding	459.73	-2.1657	0.236728	-4.92424	8.46907e-07	8.97037e-06	DEG
ENSG00000127399.10	LRRC61	protein_coding	131.332	2.98351	0.403252	4.91878	8.70862e-07	9.2187e-06	DEG
ENSG00000214688.4	C10orf105	protein_coding	35.5494	-4.87454	0.788622	-4.91305	8.96699e-07	9.48666e-06	DEG
ENSG00000154262.8	ABCA6	protein_coding	231.053	-2.85027	0.376903	-4.90913	9.14792e-07	9.67241e-06	DEG
ENSG00000116574.4	RHOU	protein_coding	406.888	2.11528	0.227202	4.90874	9.16642e-07	9.68631e-06	DEG
ENSG00000180616.4	SSTR2	protein_coding	85.5808	3.85624	0.582009	4.90755	9.22224e-07	9.73961e-06	DEG
ENSG00000254858.5	MPV17L2	protein_coding	963.821	1.75121	0.153222	4.90276	9.44998e-07	9.9743e-06	DEG
ENSG00000006634.3	DBF4	protein_coding	2070.89	1.57307	0.116923	4.90128	9.52139e-07	1.00438e-05	DEG
ENSG00000205220.7	PSMB10	protein_coding	1512.93	-1.69169	0.141151	-4.90039	9.56463e-07	1.00836e-05	DEG
ENSG00000126259.15	KIRREL2	protein_coding	63.8008	4.1406	0.64096	4.89984	9.59169e-07	1.01062e-05	DEG
ENSG00000105429.8	MEGF8	protein_coding	1162.47	-1.82802	0.169111	-4.89633	9.76432e-07	1.02821e-05	DEG
ENSG00000175746.4	C15orf54	protein_coding	41.1793	-4.54283	0.72418	-4.8922	9.97155e-07	1.04942e-05	DEG
ENSG00000166949.11	SMAD3	protein_coding	3147.99	-1.47428	0.0969754	-4.89077	1.0044e-06	1.05643e-05	DEG
ENSG00000183605.12	SFXN4	protein_coding	1458.26	1.62724	0.128357	4.88671	1.02534e-06	1.07782e-05	DEG
ENSG00000166562.4	SEC11C	protein_coding	1990.45	1.91565	0.187691	4.87852	1.06887e-06	1.12293e-05	DEG
ENSG00000146733.9	PSPH	protein_coding	1161.05	-1.74399	0.152618	-4.87484	1.08899e-06	1.14341e-05	DEG
ENSG00000010704.14	HFE	protein_coding	739.841	-2.34084	0.275784	-4.86191	1.16257e-06	1.21995e-05	DEG
ENSG00000067992.8	PDK3	protein_coding	721.906	1.87633	0.180256	4.86159	1.16447e-06	1.22124e-05	DEG
ENSG00000178150.4	ZNF114	protein_coding	44.8422	4.49932	0.719928	4.86065	1.16999e-06	1.22632e-05	DEG
ENSG00000124659.5	TBCC	protein_coding	2888.21	1.53599	0.11038	4.85589	1.19849e-06	1.25547e-05	DEG
ENSG00000049541.6	RFC2	protein_coding	2058.18	1.5961	0.122816	4.85361	1.21233e-06	1.26923e-05	DEG
ENSG00000260807.2	RP11-161M6.2	lincRNA	100.238	3.69789	0.555906	4.85314	1.21522e-06	1.27152e-05	DEG
ENSG00000119139.12	TJP2	protein_coding	1239.34	1.70546	0.145541	4.84719	1.25221e-06	1.30946e-05	DEG
ENSG00000123136.10	DDX39A	protein_coding	1924.8	1.58895	0.121742	4.83767	1.31367e-06	1.37295e-05	DEG
ENSG00000157680.11	DGKI	protein_coding	635.475	-2.27822	0.264319	-4.83591	1.32541e-06	1.38441e-05	DEG
ENSG00000049089.9	COL9A2	protein_coding	164.133	3.0407	0.422469	4.83042	1.36245e-06	1.42215e-05	DEG
ENSG00000157358.7	PRAMEF15	protein_coding	32.602	5.028	0.833898	4.83032	1.36311e-06	1.42215e-05	DEG
ENSG00000164542.8	KIAA0895	protein_coding	800.443	1.96544	0.199882	4.83007	1.36487e-06	1.42317e-05	DEG
ENSG00000008323.11	PLEKHG6	protein_coding	51.9903	4.31711	0.686791	4.82986	1.36626e-06	1.42379e-05	DEG
ENSG00000197894.6	ADH5	protein_coding	22700.2	-1.34866	0.0721986	-4.82915	1.37118e-06	1.42809e-05	DEG
ENSG00000166035.6	LIPC	protein_coding	49.6615	-4.28012	0.67928	-4.82883	1.37339e-06	1.42957e-05	DEG
ENSG00000115112.7	TFCP2L1	protein_coding	36.9609	4.80989	0.789343	4.82666	1.38843e-06	1.44357e-05	DEG
ENSG00000232423.3	PRAMEF6	protein_coding	33.1099	5.02911	0.834754	4.8267	1.38815e-06	1.44357e-05	DEG
ENSG00000215114.3	UBXN2B	protein_coding	1945.84	-1.60639	0.125643	-4.82629	1.39103e-06	1.44544e-05	DEG
ENSG00000132481.2	TRIM47	protein_coding	997.291	1.85062	0.176339	4.82378	1.4086e-06	1.46286e-05	DEG
ENSG00000054654.11	SYNE2	protein_coding	3852.87	2.49756	0.310482	4.82333	1.41178e-06	1.46532e-05	DEG
ENSG00000116962.10	NID1	protein_coding	3986.76	-1.48302	0.100166	-4.8222	1.41987e-06	1.47287e-05	DEG
ENSG00000139971.11	C14orf37	protein_coding	401.342	2.10539	0.22927	4.82132	1.42609e-06	1.47847e-05	DEG
ENSG00000270069.1	RP6-99M1.2	lincRNA	195.557	-2.65156	0.343103	-4.8136	1.48235e-06	1.53593e-05	DEG
ENSG00000071575.7	TRIB2	protein_coding	1516.52	-1.76278	0.158522	-4.81183	1.49553e-06	1.54869e-05	DEG
ENSG00000196517.7	SLC6A9	protein_coding	339.466	-2.19445	0.248611	-4.80447	1.55158e-06	1.60582e-05	DEG
ENSG00000186594.8	MIR22HG	lincRNA	1929.85	-1.58799	0.122392	-4.80412	1.55434e-06	1.60775e-05	DEG
ENSG00000166411.9	IDH3A	protein_coding	2060.37	1.6521	0.13581	4.80159	1.57411e-06	1.62727e-05	DEG
ENSG00000163017.9	ACTG2	protein_coding	46.8062	-4.44948	0.719391	-4.795	1.62677e-06	1.68069e-05	DEG
US7	US7	CMV	32.0363	5.00414	0.835085	4.79489	1.62764e-06	1.68069e-05	DEG
ENSG00000167740.5	CYB5D2	protein_coding	1514.46	-1.60551	0.12631	-4.79389	1.6358e-06	1.68815e-05	DEG
ENSG00000095637.16	SORBS1	protein_coding	476.364	2.20235	0.250864	4.79284	1.6444e-06	1.69605e-05	DEG
ENSG00000167604.9	NFKBID	protein_coding	255.386	2.49018	0.311131	4.78956	1.67145e-06	1.72298e-05	DEG
ENSG00000163053.6	SLC16A14	protein_coding	229.67	2.73185	0.36161	4.78929	1.6737e-06	1.72432e-05	DEG
ENSG00000235531.5	RP11-383H13.1	protein_coding	677.453	-2.37871	0.287918	-4.78855	1.67991e-06	1.72973e-05	DEG
ENSG00000170113.11	NIPA1	protein_coding	3746.73	1.52803	0.110328	4.78602	1.70123e-06	1.75068e-05	DEG
ENSG00000197914.2	HIST1H4K	protein_coding	2332.95	-1.79436	0.166042	-4.78409	1.71767e-06	1.7666e-05	DEG
ENSG00000049449.4	RCN1	protein_coding	11119.3	-1.39872	0.0833762	-4.7822	1.73389e-06	1.78226e-05	DEG
ENSG00000167995.11	BEST1	protein_coding	1075.24	-1.75226	0.15732	-4.78172	1.73805e-06	1.78552e-05	DEG
ENSG00000128606.8	LRRC17	protein_coding	156.159	-2.9075	0.400302	-4.76516	1.88704e-06	1.93748e-05	DEG
ENSG00000151287.12	TEX30	protein_coding	1127.35	1.77563	0.163072	4.7564	1.97073e-06	2.02226e-05	DEG
ENSG00000198830.6	HMGN2	protein_coding	8362.13	-1.44374	0.0933076	-4.7557	1.97759e-06	2.02815e-05	DEG
ENSG00000139910.15	NOVA1	protein_coding	35.2035	4.77764	0.794935	4.75214	2.0128e-06	2.06309e-05	DEG
ENSG00000225733.1	FGD5-AS1	antisense	8062.21	-1.37661	0.0793213	-4.74797	2.05469e-06	2.10484e-05	DEG
ENSG00000138639.13	ARHGAP24	protein_coding	632.792	-1.88454	0.186692	-4.738	2.15839e-06	2.20982e-05	DEG
ENSG00000168242.3	HIST1H2BI	protein_coding	2804.72	-1.58297	0.123103	-4.7356	2.18403e-06	2.2348e-05	DEG
ENSG00000163739.4	CXCL1	protein_coding	290.894	2.26866	0.267912	4.73538	2.18647e-06	2.23603e-05	DEG
ENSG00000158246.7	FAM46B	protein_coding	614.466	1.91543	0.193365	4.7342	2.19924e-06	2.24782e-05	DEG
ENSG00000250742.1	RP11-834C11.4	lincRNA	277.353	2.38841	0.293309	4.73363	2.20545e-06	2.25289e-05	DEG
ENSG00000162493.12	PDPN	protein_coding	869.642	1.96878	0.204714	4.73234	2.2195e-06	2.26597e-05	DEG
ENSG00000186635.10	ARAP1	protein_coding	3235.76	-1.49459	0.10458	-4.72929	2.25304e-06	2.29891e-05	DEG
ENSG00000162174.8	ASRGL1	protein_coding	137.077	3.0358	0.430613	4.72768	2.271e-06	2.31593e-05	DEG
ENSG00000161055.3	SCGB3A1	protein_coding	44.7706	4.36899	0.712764	4.72665	2.28255e-06	2.3264e-05	DEG
ENSG00000168453.10	HR	protein_coding	425.825	2.27486	0.269768	4.72577	2.2925e-06	2.33522e-05	DEG
ENSG00000180720.6	CHRM4	protein_coding	31.1057	4.95746	0.837684	4.72429	2.30923e-06	2.35095e-05	DEG
ENSG00000185924.6	RTN4RL1	protein_coding	63.6826	3.69605	0.571768	4.71529	2.41366e-06	2.45588e-05	DEG
ENSG00000178996.8	SNX18	protein_coding	7680.3	-1.37678	0.0799445	-4.71307	2.44008e-06	2.48136e-05	DEG
ENSG00000151640.8	DPYSL4	protein_coding	149.667	2.79045	0.380179	4.70949	2.48342e-06	2.52402e-05	DEG
ENSG00000131398.9	KCNC3	protein_coding	32.6383	4.95778	0.84046	4.70907	2.48852e-06	2.52778e-05	DEG
ENSG00000101670.7	LIPG	protein_coding	621.151	1.87954	0.1868	4.70845	2.49606e-06	2.53402e-05	DEG
ENSG00000040531.10	CTNS	protein_coding	2574	1.48702	0.103487	4.70609	2.52507e-06	2.56204e-05	DEG
ENSG00000174791.6	RIN1	protein_coding	765.296	-1.95153	0.202374	-4.70185	2.57813e-06	2.6144e-05	DEG
ENSG00000110675.8	ELMOD1	protein_coding	71.777	3.50206	0.532855	4.69558	2.6585e-06	2.69439e-05	DEG
ENSG00000144815.10	NXPE3	protein_coding	1818.67	-1.56317	0.120044	-4.69141	2.71333e-06	2.74842e-05	DEG
ENSG00000211772.4	TRBC2	TR_C_gene	121.213	-3.25801	0.481342	-4.69107	2.71781e-06	2.75142e-05	DEG
ENSG00000186462.7	NAP1L2	protein_coding	30.6644	4.93145	0.83926	4.68442	2.80753e-06	2.84066e-05	DEG
ENSG00000174607.6	UGT8	protein_coding	30.9847	4.93098	0.839885	4.68038	2.86339e-06	2.89539e-05	DEG
ENSG00000197846.3	HIST1H2BF	protein_coding	1989.78	-1.68076	0.145452	-4.68028	2.86482e-06	2.89539e-05	DEG
ENSG00000088992.13	TESC	protein_coding	43.2606	4.43287	0.733578	4.67963	2.8739e-06	2.90295e-05	DEG
ENSG00000137462.6	TLR2	protein_coding	788.2	1.79226	0.169382	4.67738	2.90563e-06	2.93336e-05	DEG
ENSG00000132361.12	CLUH	protein_coding	2971.08	1.57588	0.123146	4.67643	2.91905e-06	2.94526e-05	DEG
ENSG00000040487.8	PQLC2	protein_coding	2049.49	1.57128	0.12219	4.67529	2.93533e-06	2.96003e-05	DEG
ENSG00000131981.11	LGALS3	protein_coding	4883.58	-1.41133	0.0880028	-4.67408	2.9528e-06	2.97599e-05	DEG
ENSG00000111801.11	BTN3A3	protein_coding	322.382	-2.18881	0.254447	-4.67213	2.98086e-06	3.00261e-05	DEG
ENSG00000178149.12	DALRD3	protein_coding	1252.11	-1.70098	0.150091	-4.6704	3.00614e-06	3.02638e-05	DEG
ENSG00000255194.2	SSU72P2	pseudogene	30.383	4.91905	0.839867	4.66628	3.06706e-06	3.08599e-05	DEG
ENSG00000171903.12	CYP4F11	protein_coding	30.5685	4.91777	0.840336	4.66215	3.12927e-06	3.14684e-05	DEG
ENSG00000100479.8	POLE2	protein_coding	913.075	1.7719	0.165772	4.65639	3.21797e-06	3.23423e-05	DEG
ENSG00000170537.8	TMC7	protein_coding	154.953	2.7331	0.372247	4.65577	3.22767e-06	3.24219e-05	DEG
ENSG00000118513.14	MYB	protein_coding	82.7898	3.7547	0.591801	4.65477	3.24348e-06	3.25626e-05	DEG
ENSG00000070366.9	SMG6	protein_coding	2229.82	-1.60971	0.131084	-4.65134	3.29791e-06	3.30906e-05	DEG
ENSG00000168930.9	TRIM49	protein_coding	37.0981	4.66107	0.787577	4.64853	3.34313e-06	3.35258e-05	DEG
ENSG00000165194.10	PCDH19	protein_coding	37.4476	4.53416	0.760769	4.64551	3.39229e-06	3.4e-05	DEG
ENSG00000164142.11	FAM160A1	protein_coding	143.854	2.78973	0.385321	4.64477	3.40455e-06	3.41039e-05	DEG
ENSG00000142149.4	HUNK	protein_coding	199.544	2.53738	0.331126	4.64289	3.43563e-06	3.43962e-05	DEG
ENSG00000120438.7	TCP1	protein_coding	28640.9	1.3515	0.0757517	4.64015	3.4816e-06	3.48372e-05	DEG
ENSG00000115539.9	PDCL3	protein_coding	570.89	1.91105	0.196467	4.63716	3.53222e-06	3.53241e-05	DEG
ENSG00000183814.11	LIN9	protein_coding	1641.44	1.59151	0.127676	4.63289	3.60602e-06	3.60423e-05	DEG
ENSG00000004864.9	SLC25A13	protein_coding	638.036	2.02675	0.2217	4.63127	3.63429e-06	3.63048e-05	DEG
ENSG00000107731.8	UNC5B	protein_coding	3190.33	-1.46827	0.101125	-4.63065	3.64514e-06	3.63931e-05	DEG
ENSG00000139629.11	GALNT6	protein_coding	3202.25	-1.54454	0.117674	-4.62752	3.70079e-06	3.69283e-05	DEG
ENSG00000188848.11	BEND4	protein_coding	29.9033	4.89301	0.841344	4.62713	3.70763e-06	3.69762e-05	DEG
ENSG00000254093.4	PINX1	protein_coding	1444.95	1.66719	0.1443	4.62365	3.77047e-06	3.75821e-05	DEG
ENSG00000260604.1	RP1-140K8.5	lincRNA	62.6597	-3.75382	0.597281	-4.61059	4.01536e-06	4.0001e-05	DEG
ENSG00000127252.4	HRASLS	protein_coding	29.8386	4.88182	0.842273	4.60874	4.05123e-06	4.03361e-05	DEG
ENSG00000050555.13	LAMC3	protein_coding	50.7738	4.40992	0.74048	4.60502	4.1243e-06	4.10411e-05	DEG
ENSG00000251258.1	RFPL4B	protein_coding	71.889	3.42564	0.526782	4.60464	4.13185e-06	4.10936e-05	DEG
ENSG00000118292.4	C1orf54	protein_coding	190.728	-2.62709	0.353691	-4.6003	4.21876e-06	4.1935e-05	DEG
ENSG00000130045.11	NXNL2	protein_coding	93.1561	-3.10415	0.457444	-4.5998	4.229e-06	4.20137e-05	DEG
ENSG00000205221.8	VIT	protein_coding	34.9354	-4.42782	0.745324	-4.59911	4.24307e-06	4.21303e-05	DEG
ENSG00000130433.3	CACNG6	protein_coding	37.8681	4.50567	0.762521	4.59747	4.27654e-06	4.24283e-05	DEG
ENSG00000133816.9	MICAL2	protein_coding	3169.54	-1.44546	0.0968928	-4.59741	4.27778e-06	4.24283e-05	DEG
ENSG00000003096.9	KLHL13	protein_coding	253.265	2.29863	0.282876	4.59079	4.41567e-06	4.3748e-05	DEG
ENSG00000154655.10	L3MBTL4	protein_coding	34.8043	4.64689	0.794378	4.59087	4.41398e-06	4.3748e-05	DEG
ENSG00000169860.4	P2RY1	protein_coding	29.7908	4.87055	0.843236	4.59011	4.43003e-06	4.38663e-05	DEG
ENSG00000247626.3	MARS2	protein_coding	1193.86	1.63999	0.139527	4.58682	4.50041e-06	4.45388e-05	DEG
ENSG00000010932.11	FMO1	protein_coding	33.9801	-4.6448	0.795031	-4.58447	4.55139e-06	4.50187e-05	DEG
ENSG00000257446.2	ZNF878	protein_coding	92.3515	3.21991	0.484948	4.57763	4.70273e-06	4.64902e-05	DEG
ENSG00000145779.7	TNFAIP8	protein_coding	1595	-1.57633	0.126032	-4.57288	4.81075e-06	4.75321e-05	DEG
ENSG00000187796.9	CARD9	protein_coding	181.8	-2.53325	0.335506	-4.56997	4.87782e-06	4.81685e-05	DEG
ENSG00000108688.7	CCL7	protein_coding	66.9378	-3.53966	0.555779	-4.56954	4.88796e-06	4.82423e-05	DEG
ENSG00000147100.5	SLC16A2	protein_coding	1324.97	-1.61798	0.135277	-4.56828	4.91745e-06	4.85069e-05	DEG
ENSG00000176597.7	B3GNT5	protein_coding	1188.41	1.6512	0.142596	4.56678	4.95267e-06	4.88011e-05	DEG
ENSG00000182103.3	FAM181B	protein_coding	29.532	4.85498	0.844131	4.5668	4.95236e-06	4.88011e-05	DEG
ENSG00000155957.12	TMBIM4	protein_coding	3673.02	-1.44374	0.0971998	-4.56523	4.98942e-06	4.91364e-05	DEG
ENSG00000263812.1	LINC00908	protein_coding	83.6783	-3.15799	0.47288	-4.5635	5.03068e-06	4.95158e-05	DEG
ENSG00000101955.10	SRPX	protein_coding	1479.3	-1.6107	0.133836	-4.56307	5.0412e-06	4.95924e-05	DEG
ENSG00000130203.5	APOE	protein_coding	2511.26	1.49585	0.108671	4.56283	5.04675e-06	4.962e-05	DEG
ENSG00000262202.3	SNORD3D	lincRNA	265.562	-2.37755	0.30208	-4.56021	5.1102e-06	5.02165e-05	DEG
ENSG00000198074.5	AKR1B10	protein_coding	50.7219	-3.86569	0.628752	-4.55775	5.17056e-06	5.0782e-05	DEG
ENSG00000070808.11	CAMK2A	protein_coding	194.252	2.78773	0.392422	4.55563	5.22287e-06	5.12591e-05	DEG
ENSG00000167034.9	NKX3-1	protein_coding	341.837	2.40246	0.307858	4.55555	5.22479e-06	5.12591e-05	DEG
ENSG00000070731.5	ST6GALNAC2	protein_coding	252.168	2.30425	0.286312	4.55534	5.23e-06	5.12593e-05	DEG
ENSG00000205269.4	TMEM170B	protein_coding	2563.76	1.62093	0.136311	4.55524	5.23248e-06	5.12593e-05	DEG
ENSG00000239332.1	AC016722.2	protein_coding	73.9635	-3.3405	0.513808	-4.55521	5.23332e-06	5.12593e-05	DEG
ENSG00000171612.6	SLC25A33	protein_coding	2408.62	1.50384	0.110697	4.55156	5.32485e-06	5.21277e-05	DEG
ENSG00000171148.9	TADA3	protein_coding	4695.7	-1.40247	0.0884348	-4.55102	5.3387e-06	5.22349e-05	DEG
ENSG00000162676.7	GFI1	protein_coding	74.7685	3.63464	0.579073	4.54976	5.37083e-06	5.25209e-05	DEG
ENSG00000139174.6	PRICKLE1	protein_coding	638.585	-1.93637	0.205925	-4.54713	5.43814e-06	5.31504e-05	DEG
ENSG00000250386.1	RP11-432M8.11	pseudogene	28.9577	4.83867	0.84448	4.5456	5.4779e-06	5.35101e-05	DEG
ENSG00000105281.8	SLC1A5	protein_coding	8037.83	-1.37776	0.0832029	-4.5402	5.62021e-06	5.48706e-05	DEG
ENSG00000183092.11	BEGAIN	protein_coding	93.1963	3.67043	0.58821	4.53993	5.62725e-06	5.49097e-05	DEG
ENSG00000174004.5	NRROS	protein_coding	97.8169	3.06643	0.455316	4.53845	5.66703e-06	5.5268e-05	DEG
ENSG00000120337.7	TNFSF18	protein_coding	506.194	-4.8477	0.848315	-4.5357	5.74132e-06	5.59624e-05	DEG
ENSG00000145860.7	RNF145	protein_coding	4698.22	1.44857	0.0989406	4.53375	5.79457e-06	5.6451e-05	DEG
ENSG00000104267.5	CA2	protein_coding	28.8747	4.82766	0.845341	4.52795	5.95599e-06	5.79924e-05	DEG
ENSG00000157890.13	MEGF11	protein_coding	25.4276	4.74046	0.826366	4.5264	5.99983e-06	5.83878e-05	DEG
ENSG00000196226.2	HIST1H2BB	protein_coding	991.591	-1.80405	0.177702	-4.52469	6.04854e-06	5.88302e-05	DEG
ENSG00000111231.4	GPN3	protein_coding	1655.93	1.54932	0.121418	4.52423	6.06169e-06	5.89264e-05	DEG
ENSG00000140367.7	UBE2Q2	protein_coding	5479.83	-1.42207	0.0933519	-4.52129	6.14643e-06	5.97181e-05	DEG
ENSG00000203306.3	AP001007.1	pseudogene	167.327	3.02229	0.447628	4.5178	6.24868e-06	6.0679e-05	DEG
ENSG00000184545.6	DUSP8	protein_coding	137.622	2.73695	0.384537	4.517	6.27212e-06	6.08739e-05	DEG
ENSG00000088280.14	ASAP3	protein_coding	2034.41	-1.54205	0.120006	-4.51682	6.27738e-06	6.08923e-05	DEG
ENSG00000197584.7	KCNMB2	protein_coding	29.3191	-4.84022	0.850231	-4.51668	6.28153e-06	6.08999e-05	DEG
ENSG00000026652.9	AGPAT4	protein_coding	1079.19	1.71271	0.157828	4.51571	6.31038e-06	6.11468e-05	DEG
ENSG00000230500.1	RP11-360I20.2	antisense	83.0488	-3.24445	0.497435	-4.51205	6.42055e-06	6.2181e-05	DEG
ENSG00000153485.5	TMEM251	protein_coding	888.986	1.72488	0.160736	4.50976	6.49022e-06	6.28221e-05	DEG
ENSG00000159307.14	SCUBE1	protein_coding	28.7473	4.81562	0.846207	4.50909	6.51074e-06	6.29871e-05	DEG
ENSG00000108830.7	RND2	protein_coding	309.41	2.18507	0.263025	4.50553	6.62072e-06	6.40168e-05	DEG
ENSG00000153956.11	CACNA2D1	protein_coding	2609.02	-1.49041	0.108856	-4.50509	6.63445e-06	6.41153e-05	DEG
ENSG00000152137.2	HSPB8	protein_coding	870.815	1.79492	0.176581	4.50171	6.74081e-06	6.51083e-05	DEG
ENSG00000100285.9	NEFH	protein_coding	75.6727	3.56241	0.569557	4.49895	6.82897e-06	6.59247e-05	DEG
ENSG00000169891.13	REPS2	protein_coding	292.248	2.56901	0.348806	4.49822	6.85237e-06	6.61153e-05	DEG
ENSG00000102158.15	MAGT1	protein_coding	10052.3	-1.35226	0.0783316	-4.49698	6.89261e-06	6.64682e-05	DEG
ENSG00000171862.5	PTEN	protein_coding	19290.1	-1.38112	0.0847757	-4.49559	6.93765e-06	6.68668e-05	DEG
ENSG00000204178.5	TMEM57	protein_coding	5270.59	1.38371	0.0854251	4.49171	7.0652e-06	6.80599e-05	DEG
ENSG00000171517.5	LPAR3	protein_coding	129.999	2.80297	0.401678	4.4886	7.16918e-06	6.90248e-05	DEG
ENSG00000132530.12	XAF1	protein_coding	636.168	-1.92132	0.205345	-4.48667	7.23448e-06	6.96165e-05	DEG
ENSG00000133812.10	SBF2	protein_coding	3373.48	-1.55021	0.122938	-4.47549	7.62351e-06	7.3321e-05	DEG
ENSG00000259171.1	AL163636.6	protein_coding	74.3118	-3.32467	0.520315	-4.46782	7.90225e-06	7.59616e-05	DEG
ENSG00000181773.6	GPR3	protein_coding	225.468	2.31667	0.294759	4.46693	7.9351e-06	7.62368e-05	DEG
ENSG00000172965.10	MIR4435-1HG	lincRNA	2770.31	-1.46327	0.103739	-4.46575	7.9787e-06	7.6615e-05	DEG
ENSG00000229619.3	MBNL1-AS1	antisense	313.065	-2.3327	0.298649	-4.46244	8.10333e-06	7.77705e-05	DEG
ENSG00000258555.2	SPECC1L-ADORA2A	protein_coding	53.6429	-3.80748	0.630188	-4.455	8.38946e-06	8.04739e-05	DEG
ENSG00000108344.10	PSMD3	protein_coding	12788.5	1.37544	0.0843778	4.44946	8.6087e-06	8.24457e-05	DEG
ENSG00000128045.5	RASL11B	protein_coding	66.9778	3.48294	0.558016	4.44959	8.60358e-06	8.24457e-05	DEG
ENSG00000162944.6	RFTN2	protein_coding	767.748	-2.09707	0.246562	-4.44946	8.60862e-06	8.24457e-05	DEG
ENSG00000027869.7	SH2D2A	protein_coding	46.8449	4.17412	0.7134	4.44929	8.61528e-06	8.24651e-05	DEG
ENSG00000248869.1	RP11-138I17.1	lincRNA	30.5966	-4.67488	0.826184	-4.44801	8.66684e-06	8.29147e-05	DEG
ENSG00000170561.8	IRX2	protein_coding	503.347	1.89621	0.201522	4.4472	8.69988e-06	8.31869e-05	DEG
ENSG00000137843.7	PAK6	protein_coding	49.2172	4.47242	0.781682	4.44224	8.90252e-06	8.50795e-05	DEG
ENSG00000165215.5	CLDN3	protein_coding	27.7995	4.76827	0.848556	4.44081	8.96208e-06	8.56035e-05	DEG
ENSG00000181495.1	AC026703.1	protein_coding	26.5632	-4.77645	0.85059	-4.4398	9.00409e-06	8.59594e-05	DEG
ENSG00000142945.8	KIF2C	protein_coding	1521.44	-1.56003	0.126292	-4.43443	9.23149e-06	8.80838e-05	DEG
ENSG00000073861.2	TBX21	protein_coding	54.3324	4.04069	0.685947	4.43284	9.29985e-06	8.86893e-05	DEG
ENSG00000149090.7	PAMR1	protein_coding	8313.28	-1.38233	0.086295	-4.43045	9.40384e-06	8.96337e-05	DEG
ENSG00000106785.10	TRIM14	protein_coding	587.72	-1.89591	0.202297	-4.42868	9.48124e-06	9.03239e-05	DEG
ENSG00000164430.11	MB21D1	protein_coding	1637.54	1.55456	0.12523	4.42834	9.49628e-06	9.04195e-05	DEG
ENSG00000196449.3	YRDC	protein_coding	2898.99	1.45084	0.101834	4.42723	9.54492e-06	9.08349e-05	DEG
ENSG00000006740.12	ARHGAP44	protein_coding	117.712	3.21313	0.500174	4.42472	9.65689e-06	9.18521e-05	DEG
ENSG00000144218.14	AFF3	protein_coding	790.064	-1.8645	0.195509	-4.4218	9.78813e-06	9.30516e-05	DEG
ENSG00000163362.6	C1orf106	protein_coding	57.4957	3.79699	0.63268	4.42086	9.83105e-06	9.34105e-05	DEG
ENSG00000189292.11	FAM150B	protein_coding	33.3349	4.52961	0.79844	4.42063	9.8414e-06	9.34597e-05	DEG
ENSG00000164778.4	EN2	protein_coding	36.8045	4.26778	0.739545	4.41863	9.93282e-06	9.42784e-05	DEG
ENSG00000173598.9	NUDT4	protein_coding	6789.53	-1.38044	0.0861836	-4.41431	1.0133e-05	9.61283e-05	DEG
ENSG00000164107.7	HAND2	protein_coding	85.9067	3.38319	0.5402	4.41168	1.02573e-05	9.7256e-05	DEG
ENSG00000213023.5	SYT3	protein_coding	50.6909	3.76861	0.627645	4.4111	1.02846e-05	9.74635e-05	DEG
ENSG00000100036.11	SLC35E4	protein_coding	1113.38	1.71165	0.161337	4.41094	1.02923e-05	9.74861e-05	DEG
ENSG00000136861.13	CDK5RAP2	protein_coding	786.264	-2.00408	0.227776	-4.40816	1.04251e-05	9.8692e-05	DEG
ENSG00000115194.6	SLC30A3	protein_coding	27.4546	4.74584	0.849893	4.40743	1.04606e-05	9.89764e-05	DEG
ENSG00000178573.6	MAF	protein_coding	956.682	-1.78651	0.178463	-4.4071	1.04765e-05	9.90749e-05	DEG
ENSG00000260260.1	RP11-304L19.5	lincRNA	338.411	-2.06176	0.241023	-4.4052	1.05685e-05	9.98924e-05	DEG
ENSG00000126247.6	CAPNS1	protein_coding	1542.41	-1.8791	0.199618	-4.40392	1.06311e-05	0.000100432	DEG
ENSG00000163686.9	ABHD6	protein_coding	1259.68	1.59498	0.135261	4.39873	1.08886e-05	0.000102811	DEG
ENSG00000243073.3	PRAMEF4	protein_coding	27.6355	4.74168	0.850655	4.39858	1.08959e-05	0.000102826	DEG
ENSG00000170549.3	IRX1	protein_coding	27.629	4.73908	0.850845	4.39455	1.11e-05	0.000104698	DEG
ENSG00000132153.10	DHX30	protein_coding	6361.16	1.37588	0.085561	4.39314	1.11727e-05	0.000105273	DEG
ENSG00000255103.1	KIAA0754	protein_coding	537.811	-2.09765	0.249853	-4.39317	1.1171e-05	0.000105273	DEG
ENSG00000040608.9	RTN4R	protein_coding	374.136	2.02076	0.232404	4.39218	1.12218e-05	0.000105681	DEG
ENSG00000138696.6	BMPR1B	protein_coding	65.1453	3.58025	0.588027	4.38798	1.1441e-05	0.000107641	DEG
ENSG00000158813.13	EDA	protein_coding	38.2226	4.28507	0.748655	4.38796	1.14418e-05	0.000107641	DEG
ENSG00000064042.13	LIMCH1	protein_coding	2931.19	-1.49749	0.113439	-4.38556	1.15688e-05	0.000108666	DEG
ENSG00000092969.7	TGFB2	protein_coding	467.652	-2.00177	0.228419	-4.38566	1.15635e-05	0.000108666	DEG
ENSG00000108639.3	SYNGR2	protein_coding	1430.46	1.58164	0.132621	4.38572	1.15603e-05	0.000108666	DEG
ENSG00000236104.2	ZBTB22	protein_coding	764.167	-1.74131	0.169174	-4.38191	1.17641e-05	0.000110443	DEG
ENSG00000197991.10	PCDH20	protein_coding	27.0307	4.72633	0.850764	4.37999	1.18686e-05	0.000111366	DEG
ENSG00000147408.10	CSGALNACT1	protein_coding	27.6567	4.73015	0.851702	4.37964	1.18874e-05	0.000111485	DEG
ENSG00000130821.11	SLC6A8	protein_coding	1009.26	1.71684	0.163701	4.37895	1.19251e-05	0.000111781	DEG
ENSG00000095794.15	CREM	protein_coding	2145.05	1.512	0.116996	4.37624	1.20747e-05	0.000113124	DEG
ENSG00000169314.10	C22orf15	protein_coding	107.557	-2.9875	0.454763	-4.37042	1.2401e-05	0.000116122	DEG
ENSG00000170017.8	ALCAM	protein_coding	6102.02	-1.43272	0.0990744	-4.3676	1.25619e-05	0.000117567	DEG
ENSG00000173805.11	HAP1	protein_coding	42.1984	4.04922	0.69926	4.36064	1.29682e-05	0.000121244	DEG
ENSG00000234231.2	AC093616.4	pseudogene	712.949	-1.80176	0.183858	-4.36075	1.29617e-05	0.000121244	DEG
ENSG00000111817.12	DSE	protein_coding	7809.11	-1.3463	0.0794262	-4.35997	1.3008e-05	0.000121553	DEG
ENSG00000205045.4	SLFN12L	protein_coding	30.0142	4.52817	0.809625	4.35778	1.31389e-05	0.000122713	DEG
ENSG00000164045.7	CDC25A	protein_coding	1371.19	2.82403	0.418618	4.35726	1.31702e-05	0.000122942	DEG
ENSG00000135525.14	MAP7	protein_coding	173.9	2.46357	0.335975	4.3562	1.32342e-05	0.000123476	DEG
ENSG00000182118.5	FAM89A	protein_coding	1760.86	1.55505	0.127482	4.35397	1.33693e-05	0.000124672	DEG
ENSG00000255471.1	RP11-736K20.5	antisense	52.2814	-3.67922	0.615912	-4.35	1.36135e-05	0.000126884	DEG
ENSG00000272636.1	DOC2B	protein_coding	27.4156	4.70719	0.853183	4.34513	1.39196e-05	0.00012967	DEG
ENSG00000177551.5	NHLH2	protein_coding	27.1369	4.70025	0.853316	4.33632	1.44886e-05	0.000134901	DEG
ENSG00000095002.8	MSH2	protein_coding	6044.11	1.35873	0.0827377	4.33581	1.45227e-05	0.000135149	DEG
ENSG00000161714.7	PLCD3	protein_coding	1531.51	-1.64693	0.149303	-4.33299	1.47101e-05	0.000136823	DEG
ENSG00000197860.5	SGTB	protein_coding	1968.4	-1.55046	0.127109	-4.33062	1.4869e-05	0.00013823	DEG
ENSG00000130940.10	CASZ1	protein_coding	87.7833	3.25339	0.520393	4.33018	1.48987e-05	0.000138435	DEG
ENSG00000185090.10	MANEAL	protein_coding	614.579	1.82553	0.190704	4.32887	1.49878e-05	0.000139191	DEG
ENSG00000101695.4	RNF125	protein_coding	215.121	2.62995	0.377128	4.32202	1.54608e-05	0.000143511	DEG
ENSG00000173894.6	CBX2	protein_coding	159.707	2.59716	0.369875	4.31811	1.57374e-05	0.000146002	DEG
ENSG00000131876.12	SNRPA1	protein_coding	403.31	1.96043	0.222482	4.31689	1.58243e-05	0.000146734	DEG
ENSG00000174808.7	BTC	protein_coding	71.446	3.24965	0.521539	4.31347	1.60709e-05	0.000148944	DEG
ENSG00000138028.10	CGREF1	protein_coding	544.813	1.83269	0.193179	4.31045	1.62925e-05	0.00015092	DEG
ENSG00000231500.2	RPS18	protein_coding	105051	-1.33117	0.0768347	-4.31019	1.63111e-05	0.000151016	DEG
ENSG00000106852.11	LHX6	protein_coding	26.3283	4.6781	0.853647	4.30869	1.64223e-05	0.000151967	DEG
ENSG00000259976.1	RP11-553L6.5	lincRNA	514.671	-2.02499	0.238412	-4.29924	1.71385e-05	0.000158513	DEG
ENSG00000134548.5	C12orf39	protein_coding	50.9011	3.65281	0.617535	4.2958	1.74066e-05	0.000160911	DEG
ENSG00000122592.6	HOXA7	protein_coding	227.135	2.2617	0.294055	4.29069	1.78118e-05	0.000164573	DEG
ENSG00000080031.5	PTPRH	protein_coding	634.885	1.80368	0.187316	4.2905	1.78271e-05	0.000164593	DEG
ENSG00000155265.6	GOLGA7B	protein_coding	27.4167	4.67325	0.856148	4.29044	1.78322e-05	0.000164593	DEG
ENSG00000099901.12	RANBP1	protein_coding	8282.26	1.35942	0.0839033	4.28373	1.83786e-05	0.00016955	DEG
ENSG00000146267.11	FAXC	protein_coding	577.851	1.91688	0.214129	4.28189	1.85316e-05	0.000170874	DEG
ENSG00000183337.12	BCOR	protein_coding	575.009	1.833	0.1947	4.27836	1.88272e-05	0.000173512	DEG
ENSG00000143333.6	RGS16	protein_coding	124.325	2.71842	0.401755	4.27729	1.89186e-05	0.000174265	DEG
ENSG00000179855.5	GIPC3	protein_coding	26.8403	4.65927	0.856364	4.27303	1.92833e-05	0.000177534	DEG
ENSG00000128262.4	POM121L9P	pseudogene	24.9073	-4.66088	0.857225	-4.27062	1.9493e-05	0.000179373	DEG
ENSG00000258659.2	TRIM34	protein_coding	571.37	-1.86165	0.201811	-4.26959	1.95832e-05	0.000180112	DEG
ENSG00000102837.6	OLFM4	protein_coding	24.7789	-4.65893	0.857141	-4.26876	1.96563e-05	0.000180692	DEG
ENSG00000129514.4	FOXA1	protein_coding	104.147	3.63932	0.620082	4.25641	2.07737e-05	0.000190867	DEG
ENSG00000127561.10	SYNGR3	protein_coding	398.522	2.24881	0.293415	4.25611	2.08014e-05	0.000191024	DEG
ENSG00000073712.9	FERMT2	protein_coding	18548.7	-1.31494	0.0740123	-4.25517	2.08889e-05	0.00019173	DEG
ENSG00000152953.8	STK32B	protein_coding	807.654	-1.73458	0.172814	-4.25072	2.13087e-05	0.000195485	DEG
ENSG00000086062.8	B4GALT1	protein_coding	6148.45	-1.4058	0.0955756	-4.24584	2.1778e-05	0.000199689	DEG
ENSG00000083750.8	RRAGB	protein_coding	454.68	-2.06236	0.250267	-4.24492	2.18676e-05	0.000200408	DEG
ENSG00000142541.12	RPL13A	protein_coding	128955	-1.33022	0.0778116	-4.24388	2.19683e-05	0.00020123	DEG
ENSG00000108679.8	LGALS3BP	protein_coding	3568.1	-1.41519	0.0979278	-4.23977	2.23747e-05	0.000204849	DEG
ENSG00000077009.9	NMRK2	protein_coding	25.9884	4.63219	0.856982	4.23835	2.25171e-05	0.000206048	DEG
ENSG00000166013.11	TRIM53BP	pseudogene	26.2272	4.63344	0.857332	4.23807	2.25445e-05	0.000206194	DEG
ENSG00000108771.8	DHX58	protein_coding	334.553	-2.06432	0.251355	-4.23434	2.29224e-05	0.000209544	DEG
ENSG00000186104.6	CYP2R1	protein_coding	1004.73	1.76731	0.181275	4.23284	2.30756e-05	0.000210839	DEG
ENSG00000131378.9	RFTN1	protein_coding	1655.48	-1.52126	0.123189	-4.23137	2.32269e-05	0.000212114	DEG
ENSG00000270022.2	RNU12	lincRNA	282.066	-2.42796	0.337489	-4.23115	2.325e-05	0.000212218	DEG
ENSG00000203883.5	SOX18	protein_coding	37.4512	4.19094	0.75433	4.23016	2.33521e-05	0.000213043	DEG
ENSG00000119408.12	NEK6	protein_coding	1234.5	-1.57829	0.136724	-4.22959	2.34119e-05	0.00021348	DEG
ENSG00000107014.7	RLN2	protein_coding	25.9741	4.62583	0.85751	4.22833	2.35436e-05	0.000214573	DEG
ENSG00000167207.7	NOD2	protein_coding	69.9292	3.90084	0.686103	4.22799	2.35786e-05	0.000214784	DEG
ENSG00000198855.2	FICD	protein_coding	478.051	2.02212	0.241889	4.22559	2.38313e-05	0.000216976	DEG
ENSG00000122042.9	UBL3	protein_coding	4287.47	-1.3775	0.0894749	-4.21911	2.45273e-05	0.000223201	DEG
ENSG00000173253.10	DMRT2	protein_coding	36.5037	4.26233	0.773283	4.21881	2.45595e-05	0.000223382	DEG
ENSG00000188177.9	ZC3H6	protein_coding	691.117	-1.79426	0.188367	-4.21655	2.48067e-05	0.000225517	DEG
ENSG00000229571.2	PRAMEF26	protein_coding	26.7719	4.62168	0.859422	4.21409	2.50787e-05	0.000227875	DEG
ENSG00000009413.11	REV3L	protein_coding	10043.3	-1.40139	0.0952641	-4.21348	2.51467e-05	0.000228378	DEG
ENSG00000162976.8	PQLC3	protein_coding	1724.26	-1.53027	0.125898	-4.21191	2.53218e-05	0.000229853	DEG
ENSG00000069849.6	ATP1B3	protein_coding	8567.69	1.32699	0.0776465	4.21125	2.53959e-05	0.00023041	DEG
ENSG00000092010.10	PSME1	protein_coding	3017.08	-1.50392	0.119783	-4.20693	2.58862e-05	0.000234741	DEG
ENSG00000104219.8	ZDHHC2	protein_coding	8515.75	-1.40681	0.0967149	-4.20626	2.59637e-05	0.000235325	DEG
ENSG00000095209.7	TMEM38B	protein_coding	2586.47	1.58448	0.13901	4.20457	2.61581e-05	0.000236953	DEG
ENSG00000142530.6	FAM71E1	protein_coding	126.068	2.85758	0.441812	4.20447	2.61695e-05	0.000236953	DEG
ENSG00000173210.15	ABLIM3	protein_coding	755.551	-1.76355	0.181696	-4.20236	2.64143e-05	0.00023905	DEG
[truncated: 512 more rows]

## Sheet: DEG CMV
Geneid	gene_name	gene_type	baseMean	log2FoldChange	lfcSE	stat	pvalue	padj	classification
ENSG00000011465.12	DCN	protein_coding	65930.8	-4.00337	0.0744539	-40.3387	0	0	DEG
ENSG00000065534.14	MYLK	protein_coding	26233.9	-4.8948	0.0755225	-51.5714	0	0	DEG
ENSG00000075223.9	SEMA3C	protein_coding	23738.7	-4.21887	0.0789834	-40.7538	0	0	DEG
ENSG00000105974.7	CAV1	protein_coding	32851.8	-3.98551	0.078937	-37.8214	0	0	DEG
ENSG00000107796.8	ACTA2	protein_coding	3760.6	-6.01779	0.132909	-37.7535	0	0	DEG
ENSG00000108821.9	COL1A1	protein_coding	23251.8	-5.10396	0.105186	-39.016	0	0	DEG
ENSG00000112902.7	SEMA5A	protein_coding	12260.7	-4.32675	0.0861717	-38.6061	0	0	DEG
ENSG00000113083.8	LOX	protein_coding	28351.7	-4.2753	0.069909	-46.851	0	0	DEG
ENSG00000114251.9	WNT5A	protein_coding	62005	-3.9757	0.0689699	-43.1449	0	0	DEG
ENSG00000115380.14	EFEMP1	protein_coding	16610.6	-4.72832	0.0845402	-44.1012	0	0	DEG
ENSG00000115414.14	FN1	protein_coding	214959	-4.1516	0.0724796	-43.4826	0	0	DEG
ENSG00000115461.4	IGFBP5	protein_coding	47150.2	-6.75646	0.0928885	-61.9717	0	0	DEG
ENSG00000129048.6	ACKR4	protein_coding	5701.64	-6.7877	0.131939	-43.8664	0	0	DEG
ENSG00000133110.10	POSTN	protein_coding	4927.38	-7.78824	0.180775	-37.5507	0	0	DEG
ENSG00000137573.9	SULF1	protein_coding	20489.4	-6.46532	0.0918486	-59.5036	0	0	DEG
ENSG00000137801.9	THBS1	protein_coding	99352.6	-5.81129	0.0809395	-59.443	0	0	DEG
ENSG00000139926.11	FRMD6	protein_coding	37780.9	-4.35879	0.0687638	-48.8454	0	0	DEG
ENSG00000146674.10	IGFBP3	protein_coding	30065.6	-5.15798	0.0788715	-52.7184	0	0	DEG
ENSG00000149591.12	TAGLN	protein_coding	36915.9	-7.49044	0.0887943	-73.0952	0	0	DEG
ENSG00000163359.11	COL6A3	protein_coding	69213.9	-5.17838	0.0893654	-46.7562	0	0	DEG
ENSG00000164692.13	COL1A2	protein_coding	57503.2	-4.34728	0.0844111	-39.6545	0	0	DEG
ENSG00000165092.8	ALDH1A1	protein_coding	39195.3	-5.61854	0.0776187	-59.5029	0	0	DEG
ENSG00000168542.8	COL3A1	protein_coding	71054.3	-5.08313	0.0685342	-59.578	0	0	DEG
ENSG00000180914.6	OXTR	protein_coding	17801.7	-4.5794	0.0791264	-45.2365	0	0	DEG
ENSG00000189184.7	PCDH18	protein_coding	19798.3	-4.79079	0.0735064	-51.5709	0	0	DEG
ENSG00000204262.7	COL5A2	protein_coding	45389.2	-3.83094	0.0679375	-41.6698	0	0	DEG
ENSG00000186340.10	THBS2	protein_coding	22075.6	-4.46257	0.0926866	-37.3578	1.89277e-305	1.26823e-302	DEG
ENSG00000144810.11	COL8A1	protein_coding	10404.3	-4.9192	0.105172	-37.2647	6.1249e-304	3.95734e-301	DEG
ENSG00000101825.7	MXRA5	protein_coding	4661.33	-6.32584	0.144181	-36.9386	1.1091e-298	6.91888e-296	DEG
ENSG00000122786.15	CALD1	protein_coding	29257.7	-3.48758	0.0677292	-36.7283	2.58316e-295	1.55773e-292	DEG
ENSG00000183160.8	TMEM119	protein_coding	10315.4	-4.37083	0.0934379	-36.0757	5.464e-285	3.18869e-282	DEG
ENSG00000171150.7	SOCS5	protein_coding	19310.4	-3.58758	0.0722241	-35.8271	4.18846e-281	2.36792e-278	DEG
ENSG00000163430.5	FSTL1	protein_coding	84502.6	-3.32874	0.0651307	-35.7549	5.55833e-280	3.04714e-277	DEG
ENSG00000103888.11	KIAA1199	protein_coding	9351.6	-4.44592	0.0969642	-35.5381	1.26822e-276	6.74807e-274	DEG
ENSG00000130635.11	COL5A1	protein_coding	29221.8	-3.51978	0.071344	-35.3187	3.03e-273	1.56616e-270	DEG
ENSG00000140416.15	TPM1	protein_coding	43780.5	-3.51412	0.0718131	-35.0093	1.62597e-268	8.17096e-266	DEG
ENSG00000100234.11	TIMP3	protein_coding	81895	-3.66215	0.0765263	-34.7873	3.7789e-265	1.84768e-262	DEG
ENSG00000120708.12	TGFBI	protein_coding	23996.2	-3.35364	0.0678455	-34.6912	1.06955e-263	5.09191e-261	DEG
ENSG00000221963.5	APOL6	protein_coding	6994.11	-4.03454	0.0875999	-34.6409	6.11937e-263	2.8386e-260	DEG
ENSG00000115963.9	RND3	protein_coding	28455.2	-3.34133	0.0676252	-34.6222	1.17296e-262	5.30503e-260	DEG
ENSG00000038427.11	VCAN	protein_coding	4663.34	-4.66786	0.108964	-33.6612	2.14024e-248	9.4437e-246	DEG
ENSG00000206538.3	VGLL3	protein_coding	15358.1	-3.77839	0.082838	-33.5401	1.25704e-246	5.41455e-244	DEG
ENSG00000025039.10	RRAGD	protein_coding	3361.35	8.33806	0.219169	33.4812	9.03804e-246	3.80249e-243	DEG
ENSG00000140937.9	CDH11	protein_coding	21900.8	-3.30992	0.0694295	-33.2701	1.04719e-242	4.3056e-240	DEG
ENSG00000139329.4	LUM	protein_coding	108763	-3.78577	0.0839469	-33.1849	1.7801e-241	7.15639e-239	DEG
ENSG00000112769.14	LAMA4	protein_coding	17309.7	-3.66762	0.0811075	-32.8899	3.06791e-237	1.20655e-234	DEG
ENSG00000107562.12	CXCL12	protein_coding	3790.39	-4.54685	0.109375	-32.4282	1.09841e-230	4.22793e-228	DEG
ENSG00000181019.8	NQO1	protein_coding	19530.5	-3.26473	0.0702221	-32.2509	3.4137e-228	1.28661e-225	DEG
ENSG00000166923.6	GREM1	protein_coding	42955.8	-3.23567	0.0712263	-31.3883	2.92586e-216	1.08024e-213	DEG
ENSG00000272761.1	RP11-572C15.6	lincRNA	2455.96	-6.23339	0.166898	-31.3568	7.84871e-216	2.83982e-213	DEG
ENSG00000091986.11	CCDC80	protein_coding	7414.64	-4.20061	0.103736	-30.8535	5.03205e-209	1.78499e-206	DEG
ENSG00000255248.2	RP11-166D19.1	sense_overlapping	4071.23	-4.35044	0.110038	-30.4479	1.2753e-203	4.43683e-201	DEG
ENSG00000169429.6	IL8	protein_coding	5204.77	5.27537	0.143531	29.7871	5.73603e-195	1.95793e-192	DEG
ENSG00000134986.9	NREP	protein_coding	8644.2	-4.0945	0.1048	-29.5277	1.27061e-191	4.25679e-189	DEG
ENSG00000138685.8	FGF2	protein_coding	19452.8	-3.03625	0.0692952	-29.3852	8.48418e-190	2.79068e-187	DEG
ENSG00000078098.9	FAP	protein_coding	12226.7	-3.83076	0.0967477	-29.2592	3.42582e-188	1.10672e-185	DEG
ENSG00000122642.6	FKBP9	protein_coding	10139.5	-3.21599	0.0772181	-28.6978	4.06515e-181	1.29022e-178	DEG
ENSG00000106819.7	ASPN	protein_coding	2461.56	-7.76042	0.2362	-28.6215	3.62576e-180	1.13092e-177	DEG
UL40	UL40	CMV	100191	15.8258	0.519345	28.5472	3.04729e-179	9.34381e-177	DEG
ENSG00000151012.9	SLC7A11	protein_coding	15941.7	-3.20977	0.0778053	-28.4012	1.95278e-177	5.88795e-175	DEG
ENSG00000166145.10	SPINT1	protein_coding	2135.81	7.12331	0.216244	28.3167	2.15512e-176	6.39152e-174	DEG
US28	US28	CMV	92056.3	15.712	0.521059	28.2348	2.18699e-175	6.38143e-173	DEG
ENSG00000084636.13	COL16A1	protein_coding	11839.8	-3.09664	0.0743502	-28.1996	5.91441e-175	1.69837e-172	DEG
ENSG00000113140.6	SPARC	protein_coding	153542	-3.77735	0.0986787	-28.1454	2.72968e-174	7.71604e-172	DEG
ENSG00000111799.16	COL12A1	protein_coding	63705.6	-3.6369	0.094541	-27.8916	3.37638e-171	9.39725e-169	DEG
ENSG00000164442.8	CITED2	protein_coding	13665.6	-3.20673	0.0792197	-27.8559	9.14445e-171	2.50655e-168	DEG
UL5	UL5	CMV	81164.7	15.5456	0.523367	27.7924	5.35249e-170	1.44525e-167	DEG
US18	US18	CMV	75623.3	15.4537	0.524539	27.5551	3.83933e-167	1.02143e-164	DEG
ENSG00000136542.4	GALNT5	protein_coding	3385.11	-4.06234	0.111605	-27.4392	9.35513e-166	2.45281e-163	DEG
ENSG00000117289.7	TXNIP	protein_coding	12211.3	-3.06143	0.0753137	-27.3712	6.04074e-165	1.56119e-162	DEG
ENSG00000164220.6	F2RL2	protein_coding	2670.26	-5.47085	0.16347	-27.3497	1.08942e-164	2.77587e-162	DEG
ENSG00000163520.9	FBLN2	protein_coding	34200.7	-2.92879	0.0706853	-27.287	6.04673e-164	1.51932e-161	DEG
UL31	UL31	CMV	67926.1	15.3124	0.526515	27.1833	1.02454e-162	2.53903e-160	DEG
ENSG00000166482.7	MFAP4	protein_coding	3727.07	-4.14348	0.116031	-27.0918	1.22861e-161	3.00363e-159	DEG
UL44	UL44	CMV	66024.6	15.2748	0.527064	27.0836	1.53484e-161	3.70225e-159	DEG
UL49	UL49	CMV	65055.2	15.2558	0.5273	27.0354	5.67241e-161	1.35026e-158	DEG
ENSG00000136235.11	GPNMB	protein_coding	12830.3	-3.21831	0.0828888	-26.7625	8.84332e-158	2.07772e-155	DEG
ENSG00000008735.10	MAPK8IP2	protein_coding	1778.86	5.66006	0.174806	26.6585	1.4273e-156	3.31043e-154	DEG
UL4	UL4	CMV	58264.5	15.1058	0.529842	26.6226	3.71917e-156	8.51689e-154	DEG
ENSG00000154096.9	THY1	protein_coding	40370.6	-2.94431	0.0739067	-26.3077	1.56519e-152	3.53949e-150	DEG
ENSG00000177363.4	LRRN4CL	protein_coding	1858.13	-5.11919	0.157532	-26.1484	1.02845e-150	2.29699e-148	DEG
ENSG00000101187.11	SLCO4A1	protein_coding	1910.59	5.49891	0.172066	26.1464	1.08383e-150	2.39118e-148	DEG
ENSG00000140285.5	FGF7	protein_coding	1754.15	-4.92113	0.150456	-26.0616	9.93067e-150	2.16453e-147	DEG
ENSG00000183087.10	GAS6	protein_coding	26435.3	-3.13757	0.0822559	-25.9869	6.97259e-149	1.50168e-146	DEG
ENSG00000169744.8	LDB2	protein_coding	1793.78	-4.85881	0.149412	-25.8265	4.46524e-147	9.50361e-145	DEG
UL98	UL98	CMV	44871.8	14.7661	0.534495	25.7553	2.80877e-146	5.90854e-144	DEG
ENSG00000022267.12	FHL1	protein_coding	18212.8	-3.16087	0.084395	-25.6042	1.37038e-144	2.84961e-142	DEG
ENSG00000145147.15	SLIT2	protein_coding	6249.91	-3.54969	0.0998373	-25.5384	7.38103e-144	1.51739e-141	DEG
ENSG00000253368.3	TRNP1	protein_coding	8165.2	-3.12774	0.0837718	-25.3992	2.5715e-142	5.22709e-140	DEG
ENSG00000119681.7	LTBP2	protein_coding	6410.04	-3.74569	0.108126	-25.3934	2.98272e-142	5.99559e-140	DEG
UL43	UL43	CMV	40231.2	14.6238	0.53653	25.3924	3.05888e-142	6.08113e-140	DEG
ENSG00000026025.9	VIM	protein_coding	91914	-2.59041	0.0627208	-25.357	7.52254e-142	1.47924e-139	DEG
UL25	UL25	CMV	38957	14.5813	0.537192	25.282	5.03807e-141	9.8004e-139	DEG
UL50	UL50	CMV	38560.2	14.568	0.537377	25.2486	1.17326e-140	2.25803e-138	DEG
ENSG00000020181.13	GPR124	protein_coding	8598.74	-3.1466	0.0850453	-25.2406	1.43546e-140	2.73358e-138	DEG
ENSG00000127241.12	MASP1	protein_coding	3546.85	-4.36372	0.134723	-24.9676	1.37513e-137	2.59141e-135	DEG
UL97	UL97	CMV	35033	14.44	0.5395	24.9119	5.52407e-137	1.03027e-134	DEG
ENSG00000135919.8	SERPINE2	protein_coding	15497.5	-2.92402	0.077251	-24.9061	6.39257e-137	1.18008e-134	DEG
ENSG00000178718.5	RPP25	protein_coding	2096.73	4.42243	0.138345	24.7383	4.141e-135	7.56715e-133	DEG
ENSG00000136960.8	ENPP2	protein_coding	9185.8	-2.93784	0.0784997	-24.686	1.51336e-134	2.73782e-132	DEG
ENSG00000122420.5	PTGFR	protein_coding	2722.62	-3.96072	0.120067	-24.6588	2.96208e-134	5.30564e-132	DEG
ENSG00000117152.9	RGS4	protein_coding	5740.53	-4.19749	0.129758	-24.6419	4.49917e-134	7.97985e-132	DEG
ENSG00000165424.6	ZCCHC24	protein_coding	9929.65	-2.89958	0.0771359	-24.6265	6.57916e-134	1.15557e-131	DEG
UL112	UL112	CMV	31114.8	14.2866	0.541685	24.5282	7.38674e-133	1.28494e-130	DEG
ENSG00000041982.10	TNC	protein_coding	13898.6	-3.64518	0.108063	-24.4781	2.53022e-132	4.35944e-130	DEG
ENSG00000167460.10	TPM4	protein_coding	20095.7	-2.67177	0.068365	-24.4535	4.61674e-132	7.87939e-130	DEG
ENSG00000175899.10	A2M	protein_coding	10266	-2.98602	0.0814543	-24.3821	2.65003e-131	4.48053e-129	DEG
UL102	UL102	CMV	29324.1	14.2066	0.543116	24.3164	1.31582e-130	2.20412e-128	DEG
ENSG00000149451.13	ADAM33	protein_coding	6650.36	-3.36855	0.097685	-24.2468	7.15249e-130	1.18712e-127	DEG
ENSG00000110660.10	SLC35F2	protein_coding	1662.61	4.55594	0.146705	24.2388	8.6837e-130	1.42815e-127	DEG
ENSG00000154639.14	CXADR	protein_coding	1336.57	6.2051	0.214897	24.2214	1.32373e-129	2.15745e-127	DEG
ENSG00000138646.4	HERC5	protein_coding	1809.26	4.66617	0.152271	24.0767	4.38933e-128	7.08995e-126	DEG
ENSG00000185630.14	PBX1	protein_coding	5011.49	-3.26725	0.0943058	-24.0415	1.02389e-127	1.63923e-125	DEG
ENSG00000164181.9	ELOVL7	protein_coding	1625.43	7.55781	0.272918	24.0285	1.40023e-127	2.22207e-125	DEG
ENSG00000164932.8	CTHRC1	protein_coding	1848.18	-4.33047	0.138848	-23.9865	3.85119e-127	6.05843e-125	DEG
ENSG00000198682.8	PAPSS2	protein_coding	13047.2	-2.87671	0.0783603	-23.9497	9.29961e-127	1.45034e-124	DEG
ENSG00000151414.10	NEK7	protein_coding	23035	-2.72717	0.072312	-23.885	4.38134e-126	6.77461e-124	DEG
ENSG00000128656.9	CHN1	protein_coding	7188.75	-2.9422	0.0817088	-23.7698	6.85722e-125	1.0513e-122	DEG
ENSG00000196924.10	FLNA	protein_coding	41655.2	-3.09197	0.0881413	-23.7343	1.5969e-124	2.42769e-122	DEG
US12	US12	CMV	24429.5	13.9689	0.546748	23.7201	2.2381e-124	3.37412e-122	DEG
ENSG00000125657.3	TNFSF9	protein_coding	1325.86	6.04886	0.212883	23.7166	2.43273e-124	3.63723e-122	DEG
ENSG00000164920.5	OSR2	protein_coding	2026.82	-4.56503	0.150334	-23.7141	2.57814e-124	3.82305e-122	DEG
US20	US20	CMV	24331.1	13.9646	0.546731	23.713	2.64659e-124	3.89264e-122	DEG
UL48	UL48	CMV	24131.8	13.9537	0.546923	23.6847	5.18856e-124	7.56986e-122	DEG
ENSG00000166741.3	NNMT	protein_coding	14385.7	-3.15743	0.0911072	-23.6802	5.77241e-124	8.35429e-122	DEG
UL105	UL105	CMV	24068.2	13.9484	0.547161	23.6647	8.33258e-124	1.19639e-121	DEG
ENSG00000072952.14	MRVI1	protein_coding	1646.49	-4.81483	0.161559	-23.6126	2.86187e-123	4.07671e-121	DEG
ENSG00000162733.12	DDR2	protein_coding	19362.3	-2.70113	0.0721064	-23.592	4.66129e-123	6.58808e-121	DEG
ENSG00000079257.3	LXN	protein_coding	1656.65	-4.44092	0.146097	-23.5523	1.18769e-122	1.66562e-120	DEG
ENSG00000171451.13	DSEL	protein_coding	12415	-3.0465	0.0869725	-23.5304	1.99253e-122	2.77283e-120	DEG
UL145	UL145	CMV	22721.9	13.8751	0.548168	23.4875	5.4789e-122	7.56632e-120	DEG
UL38	UL38	CMV	22758.5	13.8755	0.548304	23.4824	6.169e-122	8.4548e-120	DEG
ENSG00000164125.11	FAM198B	protein_coding	1329.14	-5.35095	0.185739	-23.425	2.37659e-121	3.2327e-119	DEG
ENSG00000136048.9	DRAM1	protein_coding	14781.5	-3.23654	0.0954819	-23.4237	2.45218e-121	3.31062e-119	DEG
RL13/TRL14	RL13/TRL14	CMV	22731.1	13.862	0.549525	23.4056	3.74677e-121	5.02096e-119	DEG
ENSG00000204291.6	COL15A1	protein_coding	4922.21	-3.25253	0.0963622	-23.3757	7.55569e-121	1.00507e-118	DEG
UL55	UL55	CMV	22829	13.8599	0.550204	23.373	8.05349e-121	1.06347e-118	DEG
ENSG00000196569.7	LAMA2	protein_coding	4318.11	-3.4418	0.104703	-23.3212	2.70174e-120	3.54183e-118	DEG
US27	US27	CMV	21713.2	13.8105	0.549649	23.3067	3.79274e-120	4.93629e-118	DEG
UL132	UL132	CMV	21383.4	13.7924	0.54978	23.2682	9.29892e-120	1.20162e-117	DEG
ENSG00000101335.5	MYL9	protein_coding	5987.97	-3.32003	0.0999051	-23.2224	2.70669e-119	3.47281e-117	DEG
UL80	UL80	CMV	20853.9	13.7596	0.550317	23.1859	6.31605e-119	8.04673e-117	DEG
ENSG00000082482.9	KCNK2	protein_coding	2361.8	-3.8781	0.12421	-23.1713	8.86573e-119	1.12161e-116	DEG
UL84	UL84	CMV	20705.3	13.7485	0.550641	23.1521	1.3833e-118	1.73787e-116	DEG
UL27	UL27	CMV	20506.3	13.7388	0.550554	23.1381	1.91395e-118	2.38795e-116	DEG
ENSG00000165949.8	IFI27	protein_coding	1254.97	5.34545	0.189477	22.934	2.12989e-116	2.63917e-114	DEG
UL136	UL136	CMV	17970.2	13.5681	0.553213	22.7183	2.95094e-114	3.63167e-112	DEG
ENSG00000172403.6	SYNPO2	protein_coding	1428.8	-4.63155	0.160004	-22.6966	4.83749e-114	5.91317e-112	DEG
ENSG00000116016.9	EPAS1	protein_coding	9051.8	-2.7798	0.0785583	-22.6558	1.22296e-113	1.48487e-111	DEG
ENSG00000198363.11	ASPH	protein_coding	25066.5	-2.56592	0.0691664	-22.6399	1.75532e-113	2.11704e-111	DEG
UL100	UL100	CMV	17466.5	13.5314	0.553783	22.6287	2.26094e-113	2.70878e-111	DEG
ENSG00000138131.3	LOXL4	protein_coding	12896.6	-2.80455	0.0802024	-22.4999	4.15877e-112	4.94976e-110	DEG
UL135	UL135	CMV	16276.6	13.4393	0.555324	22.4	3.93422e-111	4.65189e-109	DEG
ENSG00000113721.9	PDGFRB	protein_coding	23187.8	-3.31585	0.103419	-22.3928	4.62598e-111	5.43433e-109	DEG
US19	US19	CMV	15956.4	13.4088	0.556223	22.309	3.0209e-110	3.52588e-108	DEG
ENSG00000179981.9	TSHZ1	protein_coding	2817.11	-3.49845	0.112261	-22.2557	9.92335e-110	1.15079e-107	DEG
UL54	UL54	CMV	15848.5	13.3942	0.556957	22.2534	1.04622e-109	1.20555e-107	DEG
UL95	UL95	CMV	15378.1	13.3652	0.556571	22.2168	2.36553e-109	2.70853e-107	DEG
US22	US22	CMV	15241.5	13.3535	0.556771	22.1878	4.50817e-109	5.12939e-107	DEG
UL13	UL13	CMV	15228.8	13.3521	0.556828	22.1829	5.02197e-109	5.67828e-107	DEG
ENSG00000233276.2	GPX1	protein_coding	9052.03	-2.96737	0.0888451	-22.1438	1.19718e-108	1.34523e-106	DEG
UL93	UL93	CMV	14810.1	13.316	0.55741	22.0951	3.52445e-108	3.93586e-106	DEG
ENSG00000143387.8	CTSK	protein_coding	48056.3	-2.52861	0.0692092	-22.0868	4.23527e-108	4.70063e-106	DEG
UL78	UL78	CMV	14951.7	13.3213	0.557926	22.0841	4.4913e-108	4.9544e-106	DEG
ENSG00000163431.11	LMOD1	protein_coding	1213.28	-5.06203	0.184685	-21.9944	3.25865e-107	3.57286e-105	DEG
ENSG00000050405.9	LIMA1	protein_coding	9531.54	-2.69498	0.0770872	-21.9878	3.7657e-107	4.10393e-105	DEG
ENSG00000180447.5	GAS1	protein_coding	3873.79	-3.22362	0.10115	-21.9834	4.14795e-107	4.49345e-105	DEG
UL32	UL32	CMV	14321.7	13.2709	0.558297	21.9792	4.55803e-107	4.90829e-105	DEG
UL123	UL123	CMV	13632	13.2081	0.559242	21.8297	1.21277e-105	1.29824e-103	DEG
US30	US30	CMV	12997.6	13.1459	0.56032	21.6767	3.40569e-104	3.62426e-102	DEG
ENSG00000163661.3	PTX3	protein_coding	2145.32	-3.64099	0.121924	-21.661	4.79188e-104	5.06959e-102	DEG
RL12	RL12	CMV	12593.4	13.093	0.562233	21.5089	1.28408e-102	1.3506e-100	DEG
ENSG00000170345.5	FOS	protein_coding	2327.8	-4.3323	0.155098	-21.4852	2.14298e-102	2.24097e-100	DEG
ENSG00000166920.6	C15orf48	protein_coding	1237.36	7.17992	0.287951	21.4617	3.55076e-102	3.69176e-100	DEG
UL94	UL94	CMV	11986.4	13.0396	0.56223	21.4141	9.87591e-102	1.02094e-99	DEG
UL47	UL47	CMV	11920.7	13.0324	0.562362	21.3962	1.44918e-101	1.48961e-99	DEG
UL36	UL36	CMV	11809.3	13.0207	0.56252	21.3694	2.57326e-101	2.63011e-99	DEG
US23	US23	CMV	11692	13.0081	0.562712	21.3397	4.86465e-101	4.94418e-99	DEG
ENSG00000142156.10	COL6A1	protein_coding	39180	-2.72405	0.0808801	-21.3162	8.03742e-101	8.12318e-99	DEG
UL71	UL71	CMV	11547.9	12.9911	0.563082	21.2954	1.25142e-100	1.25774e-98	DEG
ENSG00000235162.4	C12orf75	protein_coding	25211.5	-2.67268	0.0786614	-21.2643	2.43051e-100	2.4293e-98	DEG
US9	US9	CMV	11429.2	12.9761	0.56348	21.2537	3.04447e-100	3.02624e-98	DEG
US24	US24	CMV	11173.9	12.9491	0.563746	21.1958	1.04299e-99	1.03108e-97	DEG
UL144	UL144	CMV	11123.4	12.9432	0.563848	21.1816	1.41162e-99	1.38791e-97	DEG
UL148	UL148	CMV	11123.5	12.9423	0.563942	21.1764	1.57478e-99	1.53997e-97	DEG
UL80.5	UL80.5	CMV	11129.4	12.941	0.564137	21.1669	1.93024e-99	1.87741e-97	DEG
ENSG00000141753.5	IGFBP4	protein_coding	15098.8	-2.72438	0.0815192	-21.153	2.587e-99	2.50275e-97	DEG
ENSG00000166147.9	FBN1	protein_coding	36012.1	-3.34082	0.110754	-21.1353	3.76706e-99	3.62499e-97	DEG
ENSG00000050165.13	DKK3	protein_coding	48902.9	-2.38437	0.0658461	-21.0244	3.92518e-98	3.75716e-96	DEG
ENSG00000154188.5	ANGPT1	protein_coding	1302.86	-4.84884	0.183132	-21.0168	4.60777e-98	4.38733e-96	DEG
ENSG00000013016.10	EHD3	protein_coding	5140.93	-3.04616	0.0975687	-20.9715	1.19525e-97	1.13211e-95	DEG
ENSG00000250722.1	SEPP1	protein_coding	1099.01	-4.81247	0.182782	-20.8581	1.2881e-96	1.21369e-94	DEG
ENSG00000138356.9	AOX1	protein_coding	2238.14	-3.81772	0.135176	-20.8448	1.69959e-96	1.59312e-94	DEG
UL26	UL26	CMV	9963.47	12.7952	0.566881	20.8072	3.7275e-96	3.47599e-94	DEG
UL56	UL56	CMV	9940.61	12.7809	0.568108	20.7371	1.60399e-95	1.48809e-93	DEG
ENSG00000129009.8	ISLR	protein_coding	6290.05	-2.87487	0.0904999	-20.7168	2.44207e-95	2.25405e-93	DEG
US29	US29	CMV	9544.71	12.7434	0.567465	20.6945	3.88429e-95	3.56704e-93	DEG
ENSG00000060718.14	COL11A1	protein_coding	1773.86	-3.82384	0.136638	-20.6666	6.92401e-95	6.32638e-93	DEG
ENSG00000112984.7	KIF20A	protein_coding	4741.48	-3.02943	0.0982901	-20.6473	1.0317e-94	9.37917e-93	DEG
UL104	UL104	CMV	9255.98	12.7041	0.568123	20.6013	2.67431e-94	2.41905e-92	DEG
UL138	UL138	CMV	8791.45	12.6372	0.56933	20.4402	7.34966e-93	6.61506e-91	DEG
UL35	UL35	CMV	8733.39	12.6266	0.569697	20.4083	1.41016e-92	1.26293e-90	DEG
ENSG00000182179.6	UBA7	protein_coding	1896.19	-4.12945	0.153492	-20.3884	2.12048e-92	1.88974e-90	DEG
US32	US32	CMV	8617.09	12.6105	0.569871	20.374	2.84645e-92	2.52427e-90	DEG
UL28	UL28	CMV	8594.2	12.606	0.570044	20.3599	3.7958e-92	3.34974e-90	DEG
UL86	UL86	CMV	8575.74	12.5994	0.570493	20.3323	6.66263e-92	5.85115e-90	DEG
ENSG00000161570.4	CCL5	protein_coding	1514.58	8.2674	0.357759	20.3137	9.73821e-92	8.51082e-90	DEG
ENSG00000114698.10	PLSCR4	protein_coding	4223.03	-3.51199	0.124056	-20.2488	3.63888e-91	3.16495e-89	DEG
UL23	UL23	CMV	8338.34	12.562	0.571262	20.2393	4.41243e-91	3.81939e-89	DEG
ENSG00000121039.5	RDH10	protein_coding	11363.4	-2.52096	0.0757259	-20.0851	9.95627e-90	8.57709e-88	DEG
ENSG00000198467.9	TPM2	protein_coding	8544.54	-3.17399	0.108252	-20.0826	1.0484e-89	8.98893e-88	DEG
ENSG00000122707.7	RECK	protein_coding	7084.82	-2.88765	0.0942801	-20.0217	3.56237e-89	3.03994e-87	DEG
ENSG00000106366.7	SERPINE1	protein_coding	5868.77	-3.09827	0.104847	-20.0127	4.27121e-89	3.62772e-87	DEG
ENSG00000163376.7	KBTBD8	protein_coding	1453.7	4.07888	0.153874	20.0091	4.58697e-89	3.8777e-87	DEG
ENSG00000154734.10	ADAMTS1	protein_coding	3346.58	-3.29596	0.11478	-20.0032	5.16426e-89	4.34543e-87	DEG
ENSG00000165124.13	SVEP1	protein_coding	3780.46	-2.97873	0.0989707	-19.9931	6.32452e-89	5.29708e-87	DEG
ENSG00000187498.10	COL4A1	protein_coding	25452.3	-2.35662	0.0680039	-19.9492	1.52262e-88	1.26357e-86	DEG
UL20	UL20	CMV	7511.06	12.4328	0.57309	19.9493	1.51933e-88	1.26357e-86	DEG
ENSG00000137809.12	ITGA11	protein_coding	1776.33	-4.20982	0.161033	-19.9327	2.11973e-88	1.75106e-86	DEG
ENSG00000144485.6	HES6	protein_coding	1482.89	4.12197	0.156638	19.9312	2.18464e-88	1.79647e-86	DEG
ENSG00000153993.9	SEMA3D	protein_coding	3257.03	-3.02	0.101724	-19.8576	9.46718e-88	7.7498e-86	DEG
ENSG00000211448.7	DIO2	protein_coding	680.071	-6.01894	0.252838	-19.8504	1.0933e-87	8.90944e-86	DEG
ENSG00000155130.5	MARCKS	protein_coding	36944.5	-2.43415	0.0723289	-19.8283	1.69843e-87	1.37786e-85	DEG
UL89	UL89	CMV	7201.25	12.3777	0.57415	19.8166	2.14175e-87	1.72975e-85	DEG
UL114	UL114	CMV	7218.58	12.3794	0.574243	19.8163	2.15371e-87	1.73168e-85	DEG
UL46	UL46	CMV	7157.84	12.3661	0.574694	19.7776	4.63838e-87	3.71296e-85	DEG
ENSG00000135454.9	B4GALNT1	protein_coding	1077.41	4.49485	0.177377	19.703	2.0332e-86	1.62038e-84	DEG
US34	US34	CMV	6726.35	12.2886	0.575872	19.6027	1.46743e-85	1.16436e-83	DEG
US14	US14	CMV	6647.94	12.2742	0.576081	19.5705	2.76224e-85	2.18217e-83	DEG
ENSG00000256043.2	CTSO	protein_coding	1737.81	-3.60591	0.133465	-19.5251	6.71683e-85	5.28323e-83	DEG
ENSG00000152661.7	GJA1	protein_coding	6661.07	-3.11792	0.108563	-19.5087	9.26918e-85	7.25925e-83	DEG
UL119	UL119	CMV	6492.02	12.2422	0.576793	19.4908	1.31341e-84	1.02417e-82	DEG
ENSG00000163629.8	PTPN13	protein_coding	12750.3	-2.60292	0.0822823	-19.4808	1.5978e-84	1.24059e-82	DEG
ENSG00000124212.5	PTGIS	protein_coding	1235.86	-4.78584	0.194457	-19.4688	2.02034e-84	1.56196e-82	DEG
ENSG00000206337.6	HCP5	sense_overlapping	1770.02	3.63514	0.135492	19.4487	2.988e-84	2.30025e-82	DEG
ENSG00000166900.10	STX3	protein_coding	5243	2.78374	0.0917742	19.4362	3.81201e-84	2.92217e-82	DEG
ENSG00000263426.1	RN7SL471P	misc_RNA	17354.4	2.80957	0.0931703	19.4222	5.01432e-84	3.8276e-82	DEG
ENSG00000119938.8	PPP1R3C	protein_coding	3429.54	-3.20071	0.11348	-19.393	8.84676e-84	6.72465e-82	DEG
ENSG00000134013.11	LOXL2	protein_coding	9725.36	-2.73229	0.0894644	-19.3629	1.58764e-83	1.20176e-81	DEG
ENSG00000129038.11	LOXL1	protein_coding	4246.68	-3.27116	0.117691	-19.2976	5.6296e-83	4.24355e-81	DEG
US8	US8	CMV	6070.45	12.156	0.578359	19.289	6.63899e-83	4.98365e-81	DEG
ENSG00000213190.2	MLLT11	protein_coding	3116.71	3.15505	0.111953	19.2497	1.41982e-82	1.06141e-80	DEG
ENSG00000152049.5	KCNE4	protein_coding	1633.38	-3.59106	0.134611	-19.2485	1.45254e-82	1.0814e-80	DEG
UL29	UL29	CMV	6020.73	12.1423	0.578883	19.2479	1.46883e-82	1.08904e-80	DEG
UL6	UL6	CMV	5970.18	12.1348	0.578731	19.2401	1.7094e-82	1.26224e-80	DEG
US31	US31	CMV	5928.37	12.1258	0.5789	19.2188	2.57708e-82	1.8952e-80	DEG
US15	US15	CMV	5780.09	12.0902	0.579829	19.1266	1.51704e-81	1.11113e-79	DEG
ENSG00000139289.9	PHLDA1	protein_coding	4970.21	-2.71387	0.0898768	-19.069	4.56588e-81	3.3307e-79	DEG
ENSG00000004478.5	FKBP4	protein_coding	9964.67	2.67033	0.0876054	19.0666	4.78803e-81	3.47872e-79	DEG
ENSG00000183671.8	GPR1	protein_coding	923.032	-7.85448	0.360652	-19.0058	1.52748e-80	1.10535e-78	DEG
ENSG00000198796.6	ALPK2	protein_coding	2288.23	-3.80342	0.147712	-18.9789	2.54803e-80	1.83651e-78	DEG
UL115	UL115	CMV	5448.5	12.0161	0.581048	18.959	3.72347e-80	2.67307e-78	DEG
UL42	UL42	CMV	5342.37	11.9904	0.581563	18.8981	1.18238e-79	8.45473e-78	DEG
ENSG00000162591.11	MEGF6	protein_coding	7526.47	-3.36612	0.125216	-18.8964	1.22219e-79	8.70501e-78	DEG
UL87	UL87	CMV	5340.17	11.9889	0.58168	18.8917	1.33564e-79	9.4757e-78	DEG
UL150	UL150	CMV	5265.08	11.9713	0.581964	18.8521	2.82218e-79	1.99438e-77	DEG
UL117	UL117	CMV	5244.62	11.9658	0.582107	18.8381	3.67819e-79	2.58919e-77	DEG
ENSG00000101210.6	EEF1A2	protein_coding	808.26	5.79052	0.254577	18.8176	5.41748e-79	3.79875e-77	DEG
US16	US16	CMV	5086.67	11.9261	0.582891	18.7448	2.13644e-78	1.49229e-76	DEG
UL14	UL14	CMV	5067.05	11.9214	0.582963	18.7342	2.60328e-78	1.81138e-76	DEG
UL33	UL33	CMV	4905.88	11.8803	0.58371	18.6398	1.52673e-77	1.05824e-75	DEG
ENSG00000087245.8	MMP2	protein_coding	46067	-2.27603	0.0685805	-18.6063	2.85704e-77	1.97277e-75	DEG
ENSG00000155816.15	FMN2	protein_coding	1838.7	-3.56728	0.138466	-18.5409	9.66478e-77	6.64812e-75	DEG
UL52	UL52	CMV	4732.18	11.8336	0.584637	18.5305	1.173e-76	8.03817e-75	DEG
US26	US26	CMV	4730.35	11.8331	0.584647	18.5292	1.19961e-76	8.18946e-75	DEG
UL21A	UL21A	CMV	4718.82	11.8292	0.584782	18.5184	1.46671e-76	9.97526e-75	DEG
ENSG00000162496.4	DHRS3	protein_coding	5203.2	-2.92756	0.104259	-18.4881	2.5723e-76	1.7429e-74	DEG
UL99	UL99	CMV	4633.5	11.8056	0.585252	18.4632	4.08529e-76	2.75773e-74	DEG
ENSG00000180336.13	C17orf104	protein_coding	754.081	6.59707	0.303499	18.4418	6.06728e-76	4.08042e-74	DEG
UL24	UL24	CMV	4590.78	11.7913	0.585738	18.4235	8.518e-76	5.70738e-74	DEG
ENSG00000100167.15	SEPT3	protein_coding	775.224	4.78045	0.205493	18.3969	1.3899e-75	9.27846e-74	DEG
ENSG00000167601.7	AXL	protein_coding	21629.6	-2.36837	0.0743887	-18.3948	1.44501e-75	9.61089e-74	DEG
ENSG00000106236.3	NPTX2	protein_coding	794.994	6.79102	0.314941	18.3876	1.65007e-75	1.09346e-73	DEG
UL133	UL133	CMV	4495.31	11.7671	0.58596	18.3752	2.07427e-75	1.36955e-73	DEG
ENSG00000135480.10	KRT7	protein_coding	1722.66	-3.50116	0.136234	-18.3593	2.78074e-75	1.82932e-73	DEG
ENSG00000099250.13	NRP1	protein_coding	8398.95	-2.43615	0.078273	-18.3479	3.43092e-75	2.24887e-73	DEG
ENSG00000142089.11	IFITM3	protein_coding	2698.06	-3.05432	0.112059	-18.3324	4.56193e-75	2.97942e-73	DEG
UL57	UL57	CMV	4456.61	11.7369	0.588234	18.2527	1.96942e-74	1.28161e-72	DEG
ENSG00000134668.8	SPOCD1	protein_coding	1613.36	-3.39893	0.131925	-18.184	6.90824e-74	4.47946e-72	DEG
ENSG00000170624.9	SGCD	protein_coding	3651.95	-2.80705	0.0995778	-18.1471	1.35273e-73	8.74006e-72	DEG
ENSG00000246430.2	LINC00968	lincRNA	772.468	-6.84124	0.322479	-18.1135	2.49283e-73	1.6049e-71	DEG
ENSG00000135862.5	LAMC1	protein_coding	21021.9	-2.47634	0.0815369	-18.1064	2.83807e-73	1.82069e-71	DEG
ENSG00000140092.10	FBLN5	protein_coding	1429.87	-3.53648	0.140097	-18.1051	2.90358e-73	1.85614e-71	DEG
ENSG00000138758.7	SEPT11	protein_coding	34079	-2.36998	0.0756868	-18.1006	3.15183e-73	2.00774e-71	DEG
UL34	UL34	CMV	4097.19	11.6441	0.588707	18.0805	4.53875e-73	2.88107e-71	DEG
UL140	UL140	CMV	4047.79	11.6289	0.58898	18.0463	8.43472e-73	5.3354e-71	DEG
ENSG00000145431.6	PDGFC	protein_coding	2975.13	-2.92514	0.106817	-18.0229	1.28872e-72	8.12342e-71	DEG
ENSG00000071242.7	RPS6KA2	protein_coding	2867.83	-3.05567	0.114313	-17.9829	2.65433e-72	1.66734e-70	DEG
ENSG00000204387.8	C6orf48	protein_coding	6044.77	-2.66678	0.0930382	-17.915	9.01088e-72	5.64068e-70	DEG
UL22A	UL22A	CMV	3903.59	11.575	0.590684	17.903	1.11711e-71	6.96882e-70	DEG
vMIA	vMIA	CMV	3819.93	11.5557	0.590327	17.8811	1.65573e-71	1.02934e-69	DEG
ENSG00000204941.9	PSG5	protein_coding	3410.3	-2.90216	0.106608	-17.8426	3.30173e-71	2.0456e-69	DEG
ENSG00000058668.10	ATP2B4	protein_coding	25648.3	-2.26883	0.0711366	-17.8365	3.68208e-71	2.27347e-69	DEG
ENSG00000099377.9	HSD3B7	protein_coding	1880.49	-3.26661	0.127587	-17.7652	1.31554e-70	8.09504e-69	DEG
ENSG00000103196.7	CRISPLD2	protein_coding	3016.96	-3.02952	0.114324	-17.7524	1.65026e-70	1.01203e-68	DEG
ENSG00000108342.8	CSF3	protein_coding	879.191	6.08945	0.286709	17.7513	1.68428e-70	1.0294e-68	DEG
UL75	UL75	CMV	3651.2	11.4971	0.591555	17.7448	1.88928e-70	1.15081e-68	DEG
ENSG00000060982.10	BCAT1	protein_coding	18036.7	-2.38431	0.0784733	-17.6405	1.20372e-69	7.30754e-68	DEG
ENSG00000049319.2	SRD5A2	processed_transcript	598.118	-6.67702	0.322932	-17.5796	3.52904e-69	2.13525e-67	DEG
UL82	UL82	CMV	3461.51	11.4261	0.593199	17.5761	3.75439e-69	2.26402e-67	DEG
ENSG00000165072.9	MAMDC2	protein_coding	1588.84	-3.48229	0.141736	-17.5135	1.13035e-68	6.79376e-67	DEG
ENSG00000130707.13	ASS1	protein_coding	13615.9	-2.4515	0.0832031	-17.4452	3.743e-68	2.24221e-66	DEG
ENSG00000111913.11	FAM65B	protein_coding	2133.95	-3.30798	0.132389	-17.4334	4.60623e-68	2.75021e-66	DEG
ENSG00000243137.3	PSG4	protein_coding	2270.16	-3.04159	0.117324	-17.4013	8.05913e-68	4.79598e-66	DEG
ENSG00000159216.14	RUNX1	protein_coding	1925.41	-3.35896	0.135966	-17.3496	1.98463e-67	1.17718e-65	DEG
UL83	UL83	CMV	3169.98	11.3152	0.595296	17.3278	2.90095e-67	1.71507e-65	DEG
ENSG00000182272.7	B4GALNT4	protein_coding	1161.11	3.82108	0.163102	17.2964	5.00413e-67	2.94885e-65	DEG
ENSG00000164342.8	TLR3	protein_coding	978.866	-4.70372	0.214248	-17.287	5.88994e-67	3.45958e-65	DEG
ENSG00000108950.7	FAM20A	protein_coding	830.633	-5.25769	0.246581	-17.2669	8.34855e-67	4.88782e-65	DEG
ENSG00000197457.5	STMN3	protein_coding	1045.94	-4.27033	0.189741	-17.2357	1.43208e-66	8.35736e-65	DEG
ENSG00000198780.7	FAM169A	protein_coding	2210.73	3.15497	0.125316	17.1964	2.82722e-66	1.6446e-64	DEG
ENSG00000116774.7	OLFML3	protein_coding	1074.07	-3.88079	0.167728	-17.1754	4.05658e-66	2.35217e-64	DEG
ENSG00000019549.4	SNAI2	protein_coding	1388.46	-3.52963	0.147825	-17.1124	1.19963e-65	6.93372e-64	DEG
ENSG00000197646.6	PDCD1LG2	protein_coding	1482.72	-3.60824	0.152467	-17.1069	1.31864e-65	7.59728e-64	DEG
UL77	UL77	CMV	2969.05	11.2233	0.59789	17.099	1.50866e-65	8.6645e-64	DEG
UL19	UL19	CMV	2933.26	11.2149	0.597439	17.0978	1.54217e-65	8.82894e-64	DEG
ENSG00000117600.8	LPPR4	protein_coding	2658.06	-2.82608	0.106855	-17.0893	1.78363e-65	1.01791e-63	DEG
ENSG00000168427.7	KLHL30	protein_coding	746.054	5.35472	0.256736	16.9619	1.57265e-64	8.94682e-63	DEG
ENSG00000158769.13	F11R	protein_coding	652.085	5.31582	0.254819	16.9368	2.40805e-64	1.36564e-62	DEG
ENSG00000113369.4	ARRDC3	protein_coding	7449.94	-2.42097	0.084036	-16.9091	3.85435e-64	2.17903e-62	DEG
ENSG00000067798.9	NAV3	protein_coding	1707.5	-3.19099	0.12969	-16.894	4.98122e-64	2.80733e-62	DEG
UL103	UL103	CMV	2654.56	11.0849	0.600343	16.7985	2.50183e-63	1.40561e-61	DEG
ENSG00000111674.4	ENO2	protein_coding	1044.76	3.92541	0.174595	16.7554	5.16877e-63	2.89499e-61	DEG
UL51	UL51	CMV	2542.77	11.0288	0.60162	16.6696	2.18011e-62	1.2173e-60	DEG
ENSG00000196562.10	SULF2	protein_coding	1717.12	-3.23382	0.134426	-16.6175	5.20659e-62	2.89823e-60	DEG
ENSG00000169432.10	SCN9A	protein_coding	5580.28	-2.46649	0.0882625	-16.6151	5.41552e-62	3.00528e-60	DEG
ENSG00000125965.4	GDF5	protein_coding	664.653	-5.11043	0.247572	-16.6029	6.63594e-62	3.67128e-60	DEG
ENSG00000163071.6	SPATA18	protein_coding	2311.49	-3.81876	0.170243	-16.5573	1.41879e-61	7.82542e-60	DEG
ENSG00000177410.8	ZFAS1	antisense	5078.16	-2.47244	0.0889519	-16.5532	1.5174e-61	8.34387e-60	DEG
ENSG00000055732.8	MCOLN3	protein_coding	727.548	4.66728	0.22278	16.4615	6.9389e-61	3.80399e-59	DEG
ENSG00000140450.7	ARRDC4	protein_coding	6954.91	-2.44237	0.0876809	-16.4502	8.35597e-61	4.567e-59	DEG
ENSG00000261040.2	CTD-2319I12.1	processed_transcript	769.688	-4.45726	0.210369	-16.4342	1.08782e-60	5.92766e-59	DEG
ENSG00000147027.3	TMEM47	protein_coding	9623.2	-2.26872	0.0772162	-16.4307	1.15343e-60	6.2663e-59	DEG
UL96	UL96	CMV	2296.7	10.8982	0.604438	16.3759	2.84178e-60	1.53924e-58	DEG
ENSG00000135272.5	MDFIC	protein_coding	7859.54	-2.34557	0.0823823	-16.3332	5.72762e-60	3.09308e-58	DEG
ENSG00000163565.14	IFI16	protein_coding	3102.88	-2.92117	0.11765	-16.3296	6.07478e-60	3.2708e-58	DEG
ENSG00000013297.6	CLDN11	protein_coding	1088.61	-3.79906	0.171509	-16.3202	7.09053e-60	3.80637e-58	DEG
UL116	UL116	CMV	2251.47	10.8728	0.604984	16.3192	7.20965e-60	3.85887e-58	DEG
UL10	UL10	CMV	2323.22	10.893	0.606314	16.3167	7.50887e-60	4.00717e-58	DEG
ENSG00000184009.5	ACTG1	protein_coding	19462.7	-2.5927	0.0976742	-16.3063	8.90229e-60	4.73681e-58	DEG
ENSG00000234741.3	GAS5	processed_transcript	9617.09	-2.67791	0.102914	-16.3041	9.23306e-60	4.8984e-58	DEG
UL53	UL53	CMV	2240.85	10.8646	0.605355	16.2956	1.06024e-59	5.60841e-58	DEG
ENSG00000148700.9	ADD3	protein_coding	9389.82	-2.24905	0.0769244	-16.2373	2.74683e-59	1.44877e-57	DEG
UL130	UL130	CMV	2182.02	10.8318	0.605958	16.2252	3.34576e-59	1.75954e-57	DEG
ENSG00000187134.8	AKR1C1	protein_coding	1902.79	-3.18892	0.135485	-16.1562	1.02702e-58	5.38544e-57	DEG
ENSG00000120756.8	PLS1	protein_coding	905.394	4.38465	0.209869	16.1275	1.63548e-58	8.55127e-57	DEG
ENSG00000196628.9	TCF4	protein_coding	8093.26	-2.40581	0.0873243	-16.0988	2.60189e-58	1.35651e-56	DEG
RL11	RL11	CMV	2109.09	10.7678	0.609177	16.0344	7.34404e-58	3.81785e-56	DEG
ENSG00000174348.9	PODN	protein_coding	1182.97	-3.42293	0.151331	-16.0108	1.07377e-57	5.56605e-56	DEG
UL92	UL92	CMV	2008.83	10.7227	0.608649	15.9742	1.93241e-57	9.98835e-56	DEG
UL128	UL128	CMV	2001.98	10.7167	0.608925	15.9571	2.54242e-57	1.3104e-55	DEG
ENSG00000049130.9	KITLG	protein_coding	7192.73	-2.35143	0.0847208	-15.9516	2.77871e-57	1.42811e-55	DEG
ENSG00000163251.3	FZD5	protein_coding	791.982	4.10362	0.194687	15.9415	3.26204e-57	1.67177e-55	DEG
UL70	UL70	CMV	1966.34	10.698	0.608961	15.9255	4.21929e-57	2.15625e-55	DEG
UL9	UL9	CMV	1989.88	10.7021	0.609859	15.9088	5.50848e-57	2.80715e-55	DEG
ENSG00000131171.8	SH3BGRL	protein_coding	6991.04	-2.35666	0.0853508	-15.8951	6.85113e-57	3.48157e-55	DEG
ENSG00000233608.2	TWIST2	protein_coding	5182.67	-2.75644	0.11054	-15.8897	7.46573e-57	3.78326e-55	DEG
ENSG00000112246.5	SIM1	protein_coding	4514.72	-2.55985	0.0982167	-15.8817	8.489e-57	4.28979e-55	DEG
ENSG00000106823.8	ECM2	protein_coding	513.877	-5.89776	0.308776	-15.8619	1.16383e-56	5.86485e-55	DEG
ENSG00000131737.5	KRT34	protein_coding	652.909	-4.46427	0.218645	-15.8443	1.53921e-56	7.73495e-55	DEG
ENSG00000131979.14	GCH1	protein_coding	1198.16	4.0666	0.193583	15.8413	1.61494e-56	8.09304e-55	DEG
ENSG00000115884.6	SDC1	protein_coding	8525.95	-2.47732	0.0933148	-15.8316	1.88487e-56	9.41965e-55	DEG
ENSG00000150347.10	ARID5B	protein_coding	5089.24	-2.59142	0.100616	-15.8168	2.38196e-56	1.18711e-54	DEG
ENSG00000148848.10	ADAM12	protein_coding	2401.54	-3.09607	0.132582	-15.8095	2.67373e-56	1.32886e-54	DEG
ENSG00000117676.9	RPS6KA1	protein_coding	883.189	3.83353	0.17928	15.8051	2.87014e-56	1.42257e-54	DEG
ENSG00000162849.11	KIF26B	protein_coding	1594.93	-3.23473	0.141441	-15.7998	3.12307e-56	1.5437e-54	DEG
ENSG00000171345.9	KRT19	protein_coding	1654.09	-3.27605	0.144339	-15.7688	5.10041e-56	2.51421e-54	DEG
ENSG00000205542.6	TMSB4X	protein_coding	91540.4	-2.24038	0.0786985	-15.7611	5.76146e-56	2.83235e-54	DEG
UL16	UL16	CMV	1859.73	10.6246	0.610786	15.7577	6.07756e-56	2.97965e-54	DEG
ENSG00000156453.9	PCDH1	protein_coding	592.523	5.15341	0.26385	15.7416	7.84891e-56	3.83769e-54	DEG
ENSG00000003989.12	SLC7A2	protein_coding	791.752	4.22121	0.205156	15.7013	1.48249e-55	7.22903e-54	DEG
ENSG00000105767.2	CADM4	protein_coding	562.105	5.9083	0.312793	15.6918	1.71979e-55	8.36362e-54	DEG
UL73	UL73	CMV	1813.2	10.5926	0.611467	15.6879	1.8311e-55	8.88108e-54	DEG
ENSG00000142173.10	COL6A2	protein_coding	130207	-2.12074	0.0715379	-15.6664	2.5658e-55	1.24112e-53	DEG
ENSG00000116132.7	PRRX1	protein_coding	11188	-2.18096	0.075459	-15.6503	3.30616e-55	1.59498e-53	DEG
ENSG00000197147.8	LRRC8B	protein_coding	617.565	4.82145	0.245332	15.5766	1.04924e-54	5.04837e-53	DEG
ENSG00000169504.10	CLIC4	protein_coding	65969	-2.0316	0.0662447	-15.5725	1.11939e-54	5.37158e-53	DEG
UL85	UL85	CMV	1734.63	10.5349	0.612868	15.5578	1.40898e-54	6.74333e-53	DEG
ENSG00000105825.7	TFPI2	protein_coding	3716.23	3.16212	0.139113	15.5422	1.79794e-54	8.58219e-53	DEG
US11	US11	CMV	1725.6	10.5268	0.613171	15.537	1.94886e-54	9.27811e-53	DEG
ENSG00000151729.6	SLC25A4	protein_coding	2425.58	2.70884	0.110222	15.5037	3.27645e-54	1.55575e-52	DEG
ENSG00000139679.11	LPAR6	protein_coding	1181.61	-4.51852	0.227011	-15.4993	3.50638e-54	1.66058e-52	DEG
ENSG00000174807.3	CD248	protein_coding	1978	-2.9385	0.125111	-15.4943	3.79143e-54	1.79088e-52	DEG
ENSG00000169604.15	ANTXR1	protein_coding	4875.96	-2.38052	0.08911	-15.4923	3.90958e-54	1.84188e-52	DEG
ENSG00000135679.17	MDM2	protein_coding	16014.9	-2.53951	0.0996297	-15.4524	7.27325e-54	3.41767e-52	DEG
UL69	UL69	CMV	1667.62	10.485	0.613959	15.449	7.66812e-54	3.59388e-52	DEG
ENSG00000112655.11	PTK7	protein_coding	19319.1	-2.14859	0.0745324	-15.4106	1.38981e-53	6.49691e-52	DEG
ENSG00000136153.15	LMO7	protein_coding	6080.5	-2.49538	0.0970443	-15.4093	1.41805e-53	6.61183e-52	DEG
UL30	UL30	CMV	1652.22	10.4601	0.615687	15.3652	2.80321e-53	1.30367e-51	DEG
UL37	UL37	CMV	1607.28	10.4345	0.615428	15.33	4.82332e-53	2.2374e-51	DEG
ENSG00000158201.5	ABHD3	protein_coding	1690.58	3.00217	0.130664	15.323	5.36931e-53	2.4843e-51	DEG
ENSG00000171208.5	NETO2	protein_coding	5394.36	2.60809	0.105465	15.2476	1.70716e-52	7.87863e-51	DEG
ENSG00000126709.10	IFI6	protein_coding	12538.7	2.3007	0.0853387	15.2416	1.87249e-52	8.61966e-51	DEG
ENSG00000134853.7	PDGFRA	protein_coding	5680.49	-2.37109	0.0902146	-15.1981	3.64076e-52	1.6717e-50	DEG
ENSG00000115641.14	FHL2	protein_coding	2773.39	-2.62329	0.10683	-15.1951	3.81245e-52	1.74169e-50	DEG
ENSG00000187955.7	COL14A1	protein_coding	1123.8	-3.49623	0.164278	-15.1952	3.80518e-52	1.74169e-50	DEG
UL88	UL88	CMV	1506.5	10.3537	0.617121	15.1569	6.81827e-52	3.10704e-50	DEG
ENSG00000166033.7	HTRA1	protein_coding	9376.71	-2.18607	0.0784802	-15.1129	1.33092e-51	6.04965e-50	DEG
ENSG00000147403.12	RPL10	protein_coding	68189.3	-2.05871	0.0700566	-15.1123	1.34464e-51	6.09671e-50	DEG
ENSG00000131080.10	EDA2R	protein_coding	1309.76	-4.07356	0.203439	-15.108	1.4341e-51	6.48608e-50	DEG
ENSG00000162520.10	SYNC	protein_coding	3494.51	-2.57874	0.10463	-15.0889	1.91667e-51	8.64701e-50	DEG
UL7	UL7	CMV	1460.47	10.3133	0.618125	15.067	2.668e-51	1.20067e-49	DEG
UL139	UL139	CMV	1452.73	10.3066	0.618274	15.0526	3.32119e-51	1.49091e-49	DEG
ENSG00000172183.10	ISG20	protein_coding	535.604	4.66924	0.243908	15.0435	3.80781e-51	1.70512e-49	DEG
ENSG00000182871.10	COL18A1	protein_coding	19918.4	-2.1333	0.075479	-15.0147	5.87965e-51	2.62639e-49	DEG
ENSG00000138061.7	CYP1B1	protein_coding	3103.76	-2.50348	0.100314	-14.9878	8.82731e-51	3.93337e-49	DEG
UL74	UL74	CMV	1452.73	10.2897	0.620184	14.9789	1.00931e-50	4.48636e-49	DEG
ENSG00000095303.10	PTGS1	protein_coding	3192.02	-2.5292	0.102175	-14.9664	1.21749e-50	5.39844e-49	DEG
UL11	UL11	CMV	1416.23	10.2667	0.619877	14.9492	1.57566e-50	6.9695e-49	DEG
ENSG00000136205.12	TNS3	protein_coding	7631.51	-2.3791	0.0924498	-14.9173	2.54275e-50	1.12197e-48	DEG
UL72	UL72	CMV	1375.43	10.236	0.620008	14.8965	3.47167e-50	1.52813e-48	DEG
ENSG00000113070.6	HBEGF	protein_coding	1119.01	3.41745	0.162743	14.8544	6.51436e-50	2.86047e-48	DEG
ENSG00000115318.7	LOXL3	protein_coding	2307.73	-2.7946	0.120859	-14.8487	7.08903e-50	3.10527e-48	DEG
UL124	UL124	CMV	1334.55	10.1955	0.621141	14.8042	1.37679e-49	6.01631e-48	DEG
US13	US13	CMV	1313.03	10.1754	0.621561	14.7619	2.5805e-49	1.12491e-47	DEG
ENSG00000120820.8	GLT8D2	protein_coding	3060.3	-2.83124	0.124073	-14.7593	2.67875e-49	1.16493e-47	DEG
ENSG00000149257.9	SERPINH1	protein_coding	38049.2	-2.08008	0.0732198	-14.7512	3.02278e-49	1.31139e-47	DEG
US17	US17	CMV	1307.2	10.17	0.621663	14.7508	3.04155e-49	1.31638e-47	DEG
ENSG00000198805.7	PNP	protein_coding	1298.52	3.14467	0.145533	14.7366	3.74998e-49	1.61912e-47	DEG
ENSG00000189057.6	FAM111B	protein_coding	2714.75	2.62232	0.110532	14.6774	8.99581e-49	3.87484e-47	DEG
ENSG00000135931.13	ARMC9	protein_coding	3304.03	-2.74357	0.118916	-14.6621	1.12665e-48	4.84136e-47	DEG
ENSG00000086619.9	ERO1LB	protein_coding	3436.99	2.49999	0.102438	14.6428	1.49683e-48	6.41688e-47	DEG
US10	US10	CMV	1250.24	10.1089	0.623502	14.6092	2.45432e-48	1.04967e-46	DEG
ENSG00000124762.9	CDKN1A	protein_coding	16971.4	-2.46525	0.100367	-14.599	2.84935e-48	1.21288e-46	DEG
ENSG00000142871.11	CYR61	protein_coding	1055.99	-3.40607	0.164811	-14.599	2.84919e-48	1.21288e-46	DEG
ENSG00000100100.8	PIK3IP1	protein_coding	1050	-3.69359	0.18467	-14.586	3.44982e-48	1.46504e-46	DEG
ENSG00000150051.9	MKX	protein_coding	7657.61	-2.16125	0.0799726	-14.5205	8.97909e-48	3.80423e-46	DEG
ENSG00000132182.7	NUP210	protein_coding	423.992	6.80322	0.401325	14.4602	2.16288e-47	9.14223e-46	DEG
ENSG00000159403.11	C1R	protein_coding	13372.4	-2.16498	0.080628	-14.4488	2.5512e-47	1.07585e-45	DEG
ENSG00000206560.6	ANKRD28	protein_coding	7948.3	-2.13786	0.0787791	-14.4436	2.75007e-47	1.15701e-45	DEG
ENSG00000170412.12	GPRC5C	protein_coding	505.802	5.10586	0.284884	14.4124	4.32433e-47	1.81512e-45	DEG
ENSG00000141576.10	RNF157	protein_coding	535.036	5.06619	0.283262	14.3549	9.93e-47	4.15842e-45	DEG
UL122	UL122	CMV	1133.27	9.98529	0.626343	14.3456	1.13454e-46	4.74018e-45	DEG
ENSG00000175556.12	LONRF3	protein_coding	451.224	5.68287	0.326554	14.3403	1.22598e-46	5.1104e-45	DEG
ENSG00000118523.5	CTGF	protein_coding	2538.76	-2.65518	0.115699	-14.306	2.00796e-46	8.35079e-45	DEG
ENSG00000180011.6	ZADH2	protein_coding	3991.13	-2.46522	0.102492	-14.296	2.31826e-46	9.61919e-45	DEG
ENSG00000155324.5	GRAMD3	protein_coding	5296.93	-2.24577	0.0875743	-14.2252	6.38871e-46	2.64481e-44	DEG
ENSG00000198542.9	ITGBL1	protein_coding	620.373	-3.98384	0.209863	-14.218	7.08475e-46	2.92626e-44	DEG
ENSG00000176046.7	NUPR1	protein_coding	1770.5	-2.74584	0.123707	-14.1126	3.17572e-45	1.3087e-43	DEG
ENSG00000182759.3	MAFA	protein_coding	446.902	6.0714	0.359652	14.1009	3.7517e-45	1.54254e-43	DEG
ENSG00000074527.7	NTN4	protein_coding	3995.21	-2.36881	0.0972176	-14.0798	5.05185e-45	2.07241e-43	DEG
ENSG00000172667.6	ZMAT3	protein_coding	9873.14	-2.19121	0.0846764	-14.0678	5.99328e-45	2.45304e-43	DEG
US21	US21	CMV	1028.87	9.85646	0.630019	14.0574	6.93463e-45	2.83193e-43	DEG
ENSG00000177465.4	ACOT4	protein_coding	1063.25	3.29712	0.163602	14.0408	8.76716e-45	3.57222e-43	DEG
ENSG00000049323.11	LTBP1	protein_coding	2924.81	-2.42834	0.101901	-14.0169	1.22839e-44	4.99388e-43	DEG
ENSG00000136010.9	ALDH1L2	protein_coding	2863.98	-2.9165	0.136939	-13.9952	1.66668e-44	6.76051e-43	DEG
ENSG00000102024.13	PLS3	protein_coding	12882.7	-2.12036	0.0801728	-13.9743	2.23603e-44	9.04966e-43	DEG
ENSG00000134802.13	SLC43A3	protein_coding	2918.99	2.52833	0.109497	13.9578	2.82016e-44	1.13883e-42	DEG
UL1	UL1	CMV	1030.37	9.8313	0.63304	13.9506	3.11937e-44	1.25685e-42	DEG
ENSG00000154917.6	RAB6B	protein_coding	804.06	3.69014	0.192859	13.9487	3.20228e-44	1.28739e-42	DEG
ENSG00000137463.4	MGARP	protein_coding	2063.45	-2.61032	0.115597	-13.9304	4.13759e-44	1.65972e-42	DEG
ENSG00000170153.6	RNF150	protein_coding	3464.83	-2.36242	0.0979606	-13.9079	5.67561e-44	2.27162e-42	DEG
ENSG00000168785.3	TSPAN5	protein_coding	3294.23	-2.37814	0.0992382	-13.8872	7.57166e-44	3.02382e-42	DEG
ENSG00000116830.7	TTF2	protein_coding	2110.14	2.81925	0.131028	13.8845	7.86774e-44	3.13514e-42	DEG
UL8	UL8	CMV	961.515	9.77213	0.631947	13.8811	8.24554e-44	3.27846e-42	DEG
ENSG00000130513.6	GDF15	protein_coding	3042.81	-2.69511	0.122186	-13.8733	9.20075e-44	3.65024e-42	DEG
ENSG00000145050.11	MANF	protein_coding	4783.6	2.66065	0.119875	13.8532	1.21662e-43	4.81615e-42	DEG
ENSG00000079931.10	MOXD1	protein_coding	10211.5	-2.08507	0.0785288	-13.8175	1.9988e-43	7.89527e-42	DEG
ENSG00000133687.11	TMTC1	protein_coding	6058.67	-2.16226	0.0844013	-13.7706	3.82763e-43	1.50774e-41	DEG
ENSG00000137962.8	ARHGAP29	protein_coding	11324.6	-2.08892	0.0790764	-13.7705	3.83374e-43	1.50774e-41	DEG
ENSG00000138735.11	PDE5A	protein_coding	4967.06	-2.47857	0.107542	-13.7488	5.18154e-43	2.03339e-41	DEG
ENSG00000106327.8	TFR2	protein_coding	367.643	6.28348	0.388296	13.6069	3.64615e-42	1.42776e-40	DEG
ENSG00000166670.5	MMP10	protein_coding	438.993	5.6221	0.340358	13.5801	5.25564e-42	2.05356e-40	DEG
UL79	UL79	CMV	864.705	9.63254	0.635888	13.5756	5.59051e-42	2.1797e-40	DEG
ENSG00000110092.3	CCND1	protein_coding	17535.4	-2.28385	0.0950611	-13.5056	1.44992e-41	5.64099e-40	DEG
ENSG00000150687.7	PRSS23	protein_coding	12049.9	-2.23838	0.0920654	-13.4511	3.03277e-41	1.17738e-39	DEG
ENSG00000182197.6	EXT1	protein_coding	10043.4	-2.18586	0.0882132	-13.4431	3.37865e-41	1.30885e-39	DEG
ENSG00000028137.12	TNFRSF1B	protein_coding	602.744	4.75682	0.279699	13.4316	3.94527e-41	1.52508e-39	DEG
ENSG00000242173.4	ARHGDIG	protein_coding	373.671	5.66105	0.347406	13.4167	4.82581e-41	1.86149e-39	DEG
ENSG00000177181.10	RIMKLA	protein_coding	322.485	7.3424	0.472859	13.4129	5.08223e-41	1.95623e-39	DEG
ENSG00000197614.6	MFAP5	protein_coding	6750.43	-2.15677	0.0863662	-13.3938	6.57256e-41	2.52451e-39	DEG
ENSG00000196139.7	AKR1C3	protein_coding	619.886	-4.43158	0.256256	-13.3912	6.80619e-41	2.6087e-39	DEG
ENSG00000001561.6	ENPP4	protein_coding	1470.87	2.81747	0.135988	13.3649	9.69851e-41	3.70942e-39	DEG
ENSG00000256018.1	HIST1H3G	protein_coding	4854.79	-2.68346	0.12597	-13.364	9.81434e-41	3.74581e-39	DEG
ENSG00000185551.8	NR2F2	protein_coding	2316.73	-2.63418	0.122493	-13.341	1.3364e-40	5.08986e-39	DEG
ENSG00000065923.5	SLC9A7	protein_coding	997.545	-3.44277	0.183704	-13.2973	2.39927e-40	9.11875e-39	DEG
UL76	UL76	CMV	785.786	9.50372	0.639841	13.2904	2.63272e-40	9.98503e-39	DEG
ENSG00000064666.10	CNN2	protein_coding	8499.42	-2.02962	0.0776709	-13.2562	4.15565e-40	1.5728e-38	DEG
UL41A	UL41A	CMV	783.062	9.49171	0.640823	13.2513	4.4368e-40	1.6757e-38	DEG
ENSG00000150938.5	CRIM1	protein_coding	7035.25	-2.20203	0.0908867	-13.2256	6.24589e-40	2.35405e-38	DEG
ENSG00000166073.4	GPR176	protein_coding	13661.7	-2.03908	0.0787599	-13.193	9.63225e-40	3.62281e-38	DEG
UL15A	UL15A	CMV	750.895	9.45123	0.640737	13.1899	1.00364e-39	3.76697e-38	DEG
ENSG00000135744.7	AGT	protein_coding	915.053	3.9983	0.227435	13.1831	1.0976e-39	4.1111e-38	DEG
ENSG00000152503.5	TRIM36	protein_coding	500.304	4.8747	0.29455	13.1547	1.60002e-39	5.98058e-38	DEG
ENSG00000123096.7	SSPN	protein_coding	1360.28	-2.97073	0.149893	-13.1476	1.75575e-39	6.54912e-38	DEG
UL131A	UL131A	CMV	748.738	9.43779	0.64196	13.1438	1.84724e-39	6.87622e-38	DEG
ENSG00000148671.9	ADIRF	protein_coding	1508.52	-2.80098	0.137455	-13.1023	3.19585e-39	1.18719e-37	DEG
ENSG00000087086.9	FTL	protein_coding	42469.5	-2.17423	0.0896304	-13.1008	3.25759e-39	1.20764e-37	DEG
ENSG00000117228.9	GBP1	protein_coding	2056.32	-3.13755	0.163171	-13.1001	3.28921e-39	1.21687e-37	DEG
ENSG00000109790.12	KLHL5	protein_coding	6545.14	-2.08173	0.0827843	-13.0669	5.09294e-39	1.88033e-37	DEG
ENSG00000184916.4	JAG2	protein_coding	553.41	3.93772	0.22538	13.0345	7.78347e-39	2.86784e-37	DEG
ENSG00000187800.9	PEAR1	protein_coding	1280.64	-2.9061	0.146358	-13.0235	8.99183e-39	3.30633e-37	DEG
UL17	UL17	CMV	702.945	9.36447	0.643281	13.0028	1.17888e-38	4.32601e-37	DEG
ENSG00000112379.8	KIAA1244	protein_coding	1343.02	3.57106	0.198024	12.9836	1.51567e-38	5.55061e-37	DEG
ENSG00000151917.13	BEND6	protein_coding	1050.11	-3.01273	0.155113	-12.9759	1.67648e-38	6.1271e-37	DEG
ENSG00000106034.13	CPED1	protein_coding	4943.49	-2.29043	0.0995215	-12.9664	1.89788e-38	6.92231e-37	DEG
ENSG00000102996.4	MMP15	protein_coding	1468.34	2.73395	0.133763	12.9628	1.98794e-38	7.23619e-37	DEG
ENSG00000183873.11	SCN5A	protein_coding	437.225	4.71156	0.286959	12.9341	2.89057e-38	1.05006e-36	DEG
ENSG00000007968.6	E2F2	protein_coding	957.299	3.20856	0.17108	12.9095	3.97981e-38	1.44286e-36	DEG
ENSG00000165105.9	RASEF	protein_coding	712.696	3.77458	0.214996	12.9053	4.20377e-38	1.52101e-36	DEG
ENSG00000243649.4	CFB	protein_coding	999.447	3.11546	0.163927	12.9049	4.22373e-38	1.52518e-36	DEG
ENSG00000248698.1	LINC01085	lincRNA	325.76	-5.6726	0.362203	-12.9005	4.47106e-38	1.61127e-36	DEG
ENSG00000137501.12	SYTL2	protein_coding	2373.88	-2.58436	0.123414	-12.8377	1.00802e-37	3.62547e-36	DEG
ENSG00000204386.6	NEU1	protein_coding	13442	1.98466	0.0768143	12.8187	1.2886e-37	4.62541e-36	DEG
ENSG00000100097.7	LGALS1	protein_coding	62892	-1.98252	0.0768297	-12.7883	1.90693e-37	6.83135e-36	DEG
ENSG00000172346.10	CSDC2	protein_coding	1010.57	-3.02454	0.15844	-12.778	2.17584e-37	7.77926e-36	DEG
ENSG00000153162.8	BMP6	protein_coding	343.112	5.37745	0.342842	12.7681	2.46981e-37	8.81287e-36	DEG
ENSG00000127824.9	TUBA4A	protein_coding	744.542	3.51313	0.19691	12.7628	2.6438e-37	9.41514e-36	DEG
ENSG00000094804.5	CDC6	protein_coding	3622.02	2.26763	0.0996753	12.7176	4.71919e-37	1.67731e-35	DEG
ENSG00000142937.7	RPS8	protein_coding	56589.7	-1.83131	0.0655491	-12.6823	7.41456e-37	2.63013e-35	DEG
ENSG00000104332.7	SFRP1	protein_coding	10045.5	-2.0109	0.0798761	-12.6559	1.03821e-36	3.67559e-35	DEG
ENSG00000166046.6	TCP11L2	protein_coding	1587.78	-2.63346	0.129136	-12.6491	1.13107e-36	3.99652e-35	DEG
ENSG00000102760.12	RGCC	protein_coding	2633.91	-2.51474	0.1199	-12.6333	1.38377e-36	4.87989e-35	DEG
ENSG00000183098.6	GPC6	protein_coding	1887.56	-2.86598	0.147856	-12.6203	1.63249e-36	5.74578e-35	DEG
ENSG00000013364.14	MVP	protein_coding	6174.38	-2.07232	0.085045	-12.6089	1.88588e-36	6.62474e-35	DEG
ENSG00000054967.8	RELT	protein_coding	1340.65	3.20276	0.174729	12.6067	1.93895e-36	6.79796e-35	DEG
ENSG00000259716.1	RP5-977B1.11	antisense	788.818	-3.30113	0.182899	-12.5814	2.67107e-36	9.34668e-35	DEG
ENSG00000170558.4	CDH2	protein_coding	9333.59	-2.06092	0.0843645	-12.5755	2.8806e-36	1.00604e-34	DEG
ENSG00000164761.4	TNFRSF11B	protein_coding	16752	-4.72836	0.29654	-12.5728	2.97793e-36	1.03803e-34	DEG
ENSG00000140044.8	JDP2	protein_coding	1604.93	-2.68625	0.134122	-12.5725	2.99252e-36	1.04111e-34	DEG
ENSG00000165730.10	STOX1	protein_coding	367.113	4.67108	0.292087	12.5685	3.14766e-36	1.09298e-34	DEG
ENSG00000175352.6	NRIP3	protein_coding	3188.68	2.29677	0.103332	12.5495	3.99915e-36	1.38599e-34	DEG
ENSG00000113328.14	CCNG1	protein_coding	19546	-1.85229	0.0680291	-12.5283	5.22539e-36	1.80751e-34	DEG
ENSG00000168209.4	DDIT4	protein_coding	2951.39	-2.26799	0.101216	-12.5276	5.27376e-36	1.82076e-34	DEG
ENSG00000184185.5	KCNJ12	protein_coding	308.72	6.6012	0.44764	12.5127	6.35912e-36	2.19129e-34	DEG
ENSG00000163293.7	NIPAL1	protein_coding	782.09	3.50952	0.200915	12.4904	8.41863e-36	2.89546e-34	DEG
ENSG00000143674.6	MLK4	protein_coding	463.027	4.32126	0.266088	12.4818	9.38319e-36	3.22109e-34	DEG
ENSG00000072657.4	TRHDE	protein_coding	2386.05	-2.53648	0.123107	-12.4808	9.49831e-36	3.25443e-34	DEG
ENSG00000175879.7	HOXD8	protein_coding	385.315	4.46281	0.277504	12.4785	9.78714e-36	3.34705e-34	DEG
ENSG00000170271.6	FAXDC2	protein_coding	567.194	-3.64651	0.212163	-12.474	1.03549e-35	3.53455e-34	DEG
ENSG00000117592.8	PRDX6	protein_coding	24490	-1.95869	0.0768661	-12.4722	1.05923e-35	3.60198e-34	DEG
ENSG00000138678.6	AGPAT9	protein_coding	405.495	4.52053	0.28227	12.4722	1.05863e-35	3.60198e-34	DEG
ENSG00000102393.5	GLA	protein_coding	2831.8	2.34271	0.107661	12.4717	1.06515e-35	3.61531e-34	DEG
ENSG00000151388.6	ADAMTS12	protein_coding	6378.49	-2.17737	0.0944238	-12.469	1.10165e-35	3.7322e-34	DEG
ENSG00000197822.6	OCLN	protein_coding	1135.99	3.46782	0.198353	12.4416	1.55399e-35	5.2548e-34	DEG
ENSG00000197702.7	PARVA	protein_coding	6584.19	-2.02752	0.0826764	-12.4283	1.83568e-35	6.19577e-34	DEG
ENSG00000135914.5	HTR2B	protein_coding	453.065	-8.58127	0.613775	-12.3519	4.7597e-35	1.6035e-33	DEG
ENSG00000124882.3	EREG	protein_coding	10309.6	-2.27522	0.103299	-12.3449	5.18846e-35	1.74469e-33	DEG
ENSG00000134321.7	RSAD2	protein_coding	552.542	4.12588	0.253245	12.3433	5.29523e-35	1.77729e-33	DEG
ENSG00000158050.4	DUSP2	protein_coding	642.907	3.59297	0.210288	12.3306	6.20076e-35	2.07737e-33	DEG
ENSG00000164741.10	DLC1	protein_coding	4793.54	-2.10387	0.0895837	-12.3222	6.87805e-35	2.30001e-33	DEG
ENSG00000103145.6	HCFC1R1	protein_coding	1056.68	-2.93985	0.157763	-12.2959	9.52581e-35	3.17955e-33	DEG
ENSG00000123243.10	ITIH5	protein_coding	1446.2	-2.80775	0.147248	-12.2769	1.20505e-34	4.01482e-33	DEG
ENSG00000170955.9	PRKCDBP	protein_coding	9350.17	-2.21722	0.0992253	-12.2672	1.358e-34	4.51608e-33	DEG
ENSG00000137752.18	CASP1	protein_coding	464.509	-4.07691	0.251565	-12.2311	2.12119e-34	7.04119e-33	DEG
ENSG00000145012.8	LPP	protein_coding	9649.63	-2.08348	0.088692	-12.2162	2.5461e-34	8.43616e-33	DEG
ENSG00000163513.13	TGFBR2	protein_coding	5974.45	-2.09756	0.0900003	-12.1951	3.30022e-34	1.09149e-32	DEG
ENSG00000155962.8	CLIC2	protein_coding	450.166	-3.98824	0.245293	-12.1823	3.8616e-34	1.27482e-32	DEG
ENSG00000153071.10	DAB2	protein_coding	4822.96	-2.17157	0.0962065	-12.1776	4.09052e-34	1.34793e-32	DEG
ENSG00000151136.10	BTBD11	protein_coding	337.07	4.82494	0.314191	12.1739	4.27866e-34	1.40737e-32	DEG
ENSG00000101412.9	E2F1	protein_coding	2123.15	2.83494	0.150783	12.1694	4.52285e-34	1.48499e-32	DEG
ENSG00000011028.9	MRC2	protein_coding	20107.4	-2.00871	0.0830833	-12.141	6.40618e-34	2.09953e-32	DEG
ENSG00000124749.12	COL21A1	protein_coding	305.387	-5.67493	0.385415	-12.1296	7.35979e-34	2.4077e-32	DEG
ENSG00000173083.10	HPSE	protein_coding	747.249	3.45773	0.202634	12.1289	7.42182e-34	2.42361e-32	DEG
ENSG00000114270.11	COL7A1	protein_coding	4038.84	-2.21522	0.100201	-12.1278	7.52094e-34	2.45156e-32	DEG
ENSG00000100290.2	BIK	protein_coding	373.722	7.73249	0.555957	12.1097	9.38065e-34	3.05226e-32	DEG
ENSG00000141934.5	PPAP2C	protein_coding	558.098	3.8531	0.236442	12.0668	1.58165e-33	5.13709e-32	DEG
ENSG00000165716.5	FAM69B	protein_coding	285.314	5.33047	0.359618	12.0419	2.14077e-33	6.94063e-32	DEG
ENSG00000111665.7	CDCA3	protein_coding	968.981	-3.37828	0.197565	-12.038	2.24292e-33	7.2588e-32	DEG
ENSG00000081181.3	ARG2	protein_coding	936.029	3.03789	0.169352	12.0335	2.36916e-33	7.65365e-32	DEG
ENSG00000071073.8	MGAT4A	protein_coding	253.13	6.67358	0.471704	12.0278	2.53705e-33	8.18143e-32	DEG
ENSG00000068615.12	REEP1	protein_coding	268.135	6.25698	0.437501	12.0159	2.93063e-33	9.43381e-32	DEG
ENSG00000103942.8	HOMER2	protein_coding	406.032	4.04376	0.253359	12.0136	3.01273e-33	9.68086e-32	DEG
ENSG00000108691.5	CCL2	protein_coding	3160.75	-2.70044	0.141569	-12.0114	3.09568e-33	9.92976e-32	DEG
ENSG00000185650.8	ZFP36L1	protein_coding	1924.91	-2.5958	0.133011	-11.9975	3.6611e-33	1.17227e-31	DEG
ENSG00000003436.10	TFPI	protein_coding	2800.04	-2.46914	0.122557	-11.9874	4.13738e-33	1.32243e-31	DEG
ENSG00000245848.2	CEBPA	protein_coding	838.63	4.01783	0.252337	11.9595	5.78921e-33	1.84714e-31	DEG
US33	US33	CMV	474.475	8.85158	0.65863	11.9211	9.19121e-33	2.92743e-31	DEG
ENSG00000117410.9	ATP6V0B	protein_coding	13225.2	2.09024	0.0915099	11.9139	1.00134e-32	3.18371e-31	DEG
ENSG00000183798.4	EMILIN3	protein_coding	306.792	5.11085	0.345515	11.8977	1.2161e-32	3.85972e-31	DEG
ENSG00000135111.10	TBX3	protein_coding	5609.1	-2.21263	0.102048	-11.883	1.45061e-32	4.59598e-31	DEG
ENSG00000103175.6	WFDC1	protein_coding	693.428	-3.39512	0.201567	-11.8825	1.45871e-32	4.61354e-31	DEG
ENSG00000138829.6	FBN2	protein_coding	12357.2	-2.38105	0.116782	-11.8259	2.86688e-32	9.05144e-31	DEG
ENSG00000167996.11	FTH1	protein_coding	20002.7	-1.83507	0.0707026	-11.811	3.42625e-32	1.07987e-30	DEG
ENSG00000127328.17	RAB3IP	protein_coding	753.844	3.3185	0.196321	11.8098	3.47518e-32	1.09338e-30	DEG
ENSG00000185818.7	NAT8L	protein_coding	294.922	5.8513	0.4111	11.8008	3.86602e-32	1.21424e-30	DEG
ENSG00000178409.9	BEND3	protein_coding	658.191	3.52654	0.214507	11.7784	5.04586e-32	1.58206e-30	DEG
ENSG00000087085.9	ACHE	protein_coding	273.709	5.72589	0.401789	11.7621	6.11833e-32	1.915e-30	DEG
ENSG00000166448.10	TMEM130	protein_coding	383.677	-4.39472	0.288939	-11.7489	7.15281e-32	2.23491e-30	DEG
ENSG00000139209.11	SLC38A4	protein_coding	529.938	-3.56248	0.218839	-11.7094	1.14054e-31	3.55749e-30	DEG
ENSG00000180998.7	GPR137C	protein_coding	540.055	3.53706	0.216862	11.699	1.29004e-31	4.01689e-30	DEG
ENSG00000166750.5	SLFN5	protein_coding	5138.34	-2.32565	0.113461	-11.6837	1.54343e-31	4.79763e-30	DEG
ENSG00000146054.13	TRIM7	protein_coding	702.579	3.23841	0.193107	11.5916	4.54769e-31	1.41119e-29	DEG
ENSG00000138395.10	CDK15	protein_coding	352.444	-5.07418	0.351908	-11.5774	5.36391e-31	1.66162e-29	DEG
ENSG00000100473.11	COCH	protein_coding	309.121	6.35144	0.463181	11.5537	7.07268e-31	2.18721e-29	DEG
ENSG00000115295.15	CLIP4	protein_coding	5299.76	-2.03846	0.090083	-11.5278	9.55772e-31	2.95066e-29	DEG
ENSG00000203875.6	SNHG5	processed_transcript	2236.51	-2.31922	0.114802	-11.4912	1.46074e-30	4.50193e-29	DEG
ENSG00000185112.4	FAM43A	protein_coding	5947.31	-2.25174	0.109104	-11.4729	1.80515e-30	5.5539e-29	DEG
ENSG00000272695.1	GAS6-AS2	lincRNA	664.877	-3.28712	0.199443	-11.4676	1.91973e-30	5.89642e-29	DEG
ENSG00000204388.5	HSPA1B	protein_coding	2242.21	2.44289	0.125932	11.4576	2.15279e-30	6.60104e-29	DEG
ENSG00000174307.5	PHLDA3	protein_coding	5112.06	-2.07229	0.0936075	-11.4552	2.21444e-30	6.77858e-29	DEG
ENSG00000107984.5	DKK1	protein_coding	17719	-5.38636	0.383616	-11.4343	2.81942e-30	8.6159e-29	DEG
ENSG00000021826.10	CPS1	protein_coding	507.393	-3.74179	0.240449	-11.4028	4.04885e-30	1.23521e-28	DEG
ENSG00000175938.6	ORAI3	protein_coding	2604.15	-2.33445	0.117218	-11.3844	5.00123e-30	1.52319e-28	DEG
UL147	UL147	CMV	390.137	8.59222	0.667172	11.3797	5.27851e-30	1.60493e-28	DEG
ENSG00000158220.9	ESYT3	protein_coding	265.818	5.11276	0.362467	11.3466	7.71159e-30	2.34078e-28	DEG
ENSG00000169083.11	AR	protein_coding	2762.72	-2.34741	0.11881	-11.3409	8.23196e-30	2.49455e-28	DEG
ENSG00000134871.13	COL4A2	protein_coding	38431.8	-1.7475	0.0659798	-11.3292	9.41133e-30	2.84716e-28	DEG
ENSG00000197415.7	VEPH1	protein_coding	1165.04	-2.74138	0.153973	-11.3096	1.17565e-29	3.5507e-28	DEG
ENSG00000131634.9	TMEM204	protein_coding	3237.92	-2.21679	0.107836	-11.2838	1.57859e-29	4.75972e-28	DEG
UL146	UL146	CMV	377.013	8.54554	0.668849	11.2814	1.62171e-29	4.8816e-28	DEG
ENSG00000049239.8	H6PD	protein_coding	3486.05	-2.17141	0.103987	-11.265	1.95285e-29	5.8686e-28	DEG
ENSG00000250786.1	SNHG18	lincRNA	1528.4	-2.59229	0.141684	-11.2383	2.6437e-29	7.93153e-28	DEG
ENSG00000172348.10	RCAN2	protein_coding	1830.83	-2.33704	0.119016	-11.2341	2.77178e-29	8.30203e-28	DEG
ENSG00000163624.5	CDS1	protein_coding	368.134	8.51647	0.669627	11.2249	3.07851e-29	9.20552e-28	DEG
ENSG00000184792.11	OSBP2	protein_coding	357.704	4.16161	0.282125	11.2064	3.79366e-29	1.13253e-27	DEG
ENSG00000105989.4	WNT2	protein_coding	969.431	-2.75591	0.156777	-11.2	4.07568e-29	1.21471e-27	DEG
ENSG00000175061.13	C17orf76-AS1	processed_transcript	20611.2	-1.8067	0.0720453	-11.1971	4.21434e-29	1.25398e-27	DEG
ENSG00000005243.5	COPZ2	protein_coding	1692.76	-2.40369	0.125654	-11.1711	5.64926e-29	1.67817e-27	DEG
ENSG00000241749.3	RPSAP52	pseudogene	314.519	-4.40916	0.305333	-11.1654	6.02303e-29	1.78627e-27	DEG
ENSG00000174672.11	BRSK2	protein_coding	297.671	5.62528	0.415499	11.1319	8.77716e-29	2.59882e-27	DEG
ENSG00000215612.5	HMX1	protein_coding	353.817	8.46496	0.671286	11.1204	9.98382e-29	2.95126e-27	DEG
ENSG00000165244.6	ZNF367	protein_coding	3006.65	2.13405	0.101982	11.1201	1.00205e-28	2.95727e-27	DEG
ENSG00000072110.9	ACTN1	protein_coding	11755.4	-1.80419	0.0724391	-11.1016	1.23227e-28	3.63077e-27	DEG
ENSG00000171551.7	ECEL1	protein_coding	284.609	7.61984	0.596442	11.0989	1.27036e-28	3.73692e-27	DEG
ENSG00000143995.15	MEIS1	protein_coding	2525.07	-2.2746	0.115182	-11.0659	1.83562e-28	5.39093e-27	DEG
ENSG00000069275.12	NUCKS1	protein_coding	16564.9	-1.81667	0.0738661	-11.0561	2.04868e-28	6.00693e-27	DEG
ENSG00000047365.7	ARAP2	protein_coding	265.777	7.30056	0.570131	11.0511	2.16598e-28	6.34056e-27	DEG
ENSG00000128268.11	MGAT3	protein_coding	298.789	5.35771	0.394615	11.0429	2.3716e-28	6.93127e-27	DEG
ENSG00000184060.6	ADAP2	protein_coding	367.272	4.04418	0.275683	11.0423	2.38784e-28	6.96749e-27	DEG
ENSG00000162444.11	RBP7	protein_coding	305.212	7.9654	0.630938	11.0398	2.45693e-28	7.15755e-27	DEG
UL48A	UL48A	CMV	348.15	8.43081	0.673517	11.0328	2.65349e-28	7.71774e-27	DEG
ENSG00000176907.3	C8orf4	protein_coding	424.898	-3.8381	0.25782	-11.0081	3.49448e-28	1.01474e-26	DEG
ENSG00000104435.9	STMN2	protein_coding	232.88	-6.62867	0.511472	-11.0049	3.62116e-28	1.04985e-26	DEG
ENSG00000145390.7	USP53	protein_coding	4601.94	-2.31691	0.119928	-10.9808	4.72596e-28	1.36796e-26	DEG
ENSG00000133134.7	BEX2	protein_coding	259.701	5.93293	0.449789	10.9672	5.49392e-28	1.58771e-26	DEG
ENSG00000090674.11	MCOLN1	protein_coding	1523.89	2.52887	0.139451	10.9635	5.72481e-28	1.6518e-26	DEG
ENSG00000049540.12	ELN	protein_coding	1194.5	-2.92731	0.175926	-10.9552	6.2724e-28	1.80691e-26	DEG
ENSG00000224259.1	RP11-48O20.4	lincRNA	245.754	-7.27406	0.57287	-10.952	6.50168e-28	1.86998e-26	DEG
ENSG00000143341.7	HMCN1	protein_coding	881.916	-3.28705	0.208835	-10.9515	6.53828e-28	1.87753e-26	DEG
ENSG00000244694.3	PTCHD4	protein_coding	289.281	-4.45351	0.315464	-10.9474	6.83911e-28	1.9608e-26	DEG
ENSG00000066248.10	NGEF	protein_coding	256.526	5.16943	0.380884	10.9467	6.89042e-28	1.97238e-26	DEG
ENSG00000124406.12	ATP8A1	protein_coding	473.274	4.29951	0.301999	10.9255	8.70228e-28	2.48709e-26	DEG
ENSG00000100311.12	PDGFB	protein_coding	241.397	6.32048	0.487542	10.9129	1.00047e-27	2.8548e-26	DEG
ENSG00000164010.9	ERMAP	protein_coding	1576.95	-2.43166	0.131415	-10.8942	1.22801e-27	3.49857e-26	DEG
ENSG00000171714.10	ANO5	protein_coding	327.252	8.35686	0.675401	10.8926	1.25043e-27	3.55686e-26	DEG
ENSG00000154548.8	SRSF12	protein_coding	252.231	5.69891	0.431684	10.8851	1.3578e-27	3.85621e-26	DEG
ENSG00000198885.5	ITPRIPL1	protein_coding	365.346	4.19208	0.293802	10.8648	1.69668e-27	4.81107e-26	DEG
ENSG00000185088.8	RPS27L	protein_coding	10917.2	-1.88108	0.0811935	-10.8517	1.95809e-27	5.54362e-26	DEG
ENSG00000168734.9	PKIG	protein_coding	1359.76	-2.71521	0.158369	-10.8305	2.4688e-27	6.9786e-26	DEG
ENSG00000197635.5	DPP4	protein_coding	2327.69	-2.30341	0.120401	-10.8255	2.60515e-27	7.35255e-26	DEG
ENSG00000149380.7	P4HA3	protein_coding	559.023	-3.28375	0.211672	-10.7891	3.87513e-27	1.09198e-25	DEG
ENSG00000145248.6	SLC10A4	protein_coding	251.046	7.17532	0.572563	10.7854	4.03534e-27	1.13536e-25	DEG
ENSG00000263873.1	RP11-334E6.12	sense_intronic	641.931	-3.16422	0.200744	-10.781	4.23302e-27	1.18912e-25	DEG
ENSG00000160013.4	PTGIR	protein_coding	1352.23	-2.45264	0.135228	-10.7422	6.45153e-27	1.80953e-25	DEG
ENSG00000187079.10	TEAD1	protein_coding	11264.7	-1.8574	0.0798624	-10.7359	6.90123e-27	1.93267e-25	DEG
ENSG00000140682.14	TGFB1I1	protein_coding	1608.34	-2.36943	0.127639	-10.729	7.44287e-27	2.08113e-25	DEG
ENSG00000167680.11	SEMA6B	protein_coding	304.135	8.26406	0.678265	10.7098	9.1594e-27	2.55714e-25	DEG
ENSG00000189058.4	APOD	protein_coding	1792.78	-2.36145	0.127201	-10.7032	9.8347e-27	2.74144e-25	DEG
ENSG00000117525.9	F3	protein_coding	3031.98	-2.32381	0.123847	-10.6891	1.14521e-26	3.18739e-25	DEG
ENSG00000173114.8	LRRN3	protein_coding	1064.85	-2.95497	0.182958	-10.6853	1.19219e-26	3.31304e-25	DEG
ENSG00000163975.7	MFI2	protein_coding	451.104	3.64919	0.248118	10.6771	1.30236e-26	3.61364e-25	DEG
ENSG00000130734.5	ATG4D	protein_coding	1903.84	2.27895	0.119842	10.672	1.37634e-26	3.81306e-25	DEG
ENSG00000186891.9	TNFRSF18	protein_coding	248.945	5.40026	0.412965	10.6553	1.6474e-26	4.55706e-25	DEG
ENSG00000128590.4	DNAJB9	protein_coding	2201.38	2.51811	0.142819	10.6296	2.17111e-26	5.99658e-25	DEG
ENSG00000139178.6	C1RL	protein_coding	1431.68	-2.43694	0.13519	-10.6291	2.1823e-26	6.01829e-25	DEG
ENSG00000187720.10	THSD4	protein_coding	2212.2	-2.22059	0.114876	-10.6253	2.27292e-26	6.25867e-25	DEG
ENSG00000164440.10	TXLNB	protein_coding	312.336	-4.1438	0.296011	-10.6205	2.39155e-26	6.5753e-25	DEG
ENSG00000164294.9	GPX8	protein_coding	14783.9	-1.78067	0.0735392	-10.6157	2.51921e-26	6.91578e-25	DEG
ENSG00000177374.8	HIC1	protein_coding	3619.62	-2.03504	0.0975243	-10.6131	2.59016e-26	7.09979e-25	DEG
ENSG00000091136.9	LAMB1	protein_coding	8490.33	-2.04348	0.0984117	-10.6032	2.87938e-26	7.88061e-25	DEG
ENSG00000113575.5	PPP2CA	protein_coding	6479.55	2.2693	0.119735	10.6009	2.95196e-26	8.06705e-25	DEG
ENSG00000196549.6	MME	protein_coding	7559.96	-2.08049	0.102038	-10.5891	3.34785e-26	9.13515e-25	DEG
ENSG00000184838.10	PRR16	protein_coding	637.463	-3.04641	0.193471	-10.5773	3.79688e-26	1.03448e-24	DEG
ENSG00000183578.5	TNFAIP8L3	protein_coding	233.542	6.84859	0.554124	10.5547	4.83362e-26	1.31496e-24	DEG
ENSG00000120913.19	PDLIM2	protein_coding	5000.17	-2.0663	0.101169	-10.5398	5.66491e-26	1.5388e-24	DEG
ENSG00000197256.6	KANK2	protein_coding	3830	-2.0537	0.100028	-10.5341	6.01673e-26	1.63191e-24	DEG
ENSG00000182492.11	BGN	protein_coding	2295.24	-2.34257	0.127565	-10.5246	6.65393e-26	1.80204e-24	DEG
UL149	UL149	CMV	285.423	8.17177	0.682193	10.5128	7.54121e-26	2.03928e-24	DEG
ENSG00000197943.5	PLCG2	protein_coding	270.606	4.44597	0.32822	10.499	8.7313e-26	2.35758e-24	DEG
ENSG00000125740.9	FOSB	protein_coding	355.534	-4.04992	0.291269	-10.4711	1.17225e-25	3.16052e-24	DEG
ENSG00000204520.8	MICA	protein_coding	7213.87	1.86127	0.0822799	10.4675	1.21767e-25	3.27809e-24	DEG
ENSG00000153904.14	DDAH1	protein_coding	19575.3	-1.898	0.0858027	-10.4659	1.23899e-25	3.33054e-24	DEG
ENSG00000120694.15	HSPH1	protein_coding	8622.65	1.94534	0.0908375	10.407	2.30409e-25	6.18446e-24	DEG
ENSG00000146376.6	ARHGAP18	protein_coding	1759.16	-2.25935	0.121153	-10.3947	2.62031e-25	7.02281e-24	DEG
ENSG00000149596.6	JPH2	protein_coding	748.137	-2.86616	0.179626	-10.3892	2.77759e-25	7.43334e-24	DEG
ENSG00000171365.11	CLCN5	protein_coding	1992.35	2.29181	0.124458	10.3795	3.0738e-25	8.2139e-24	DEG
ENSG00000196141.8	SPATS2L	protein_coding	6195.23	-1.90514	0.0873094	-10.367	3.50253e-25	9.34576e-24	DEG
ENSG00000116711.8	PLA2G4A	protein_coding	1496.8	2.36758	0.131942	10.365	3.5765e-25	9.52907e-24	DEG
ENSG00000181104.6	F2R	protein_coding	3978.02	-1.9608	0.0927587	-10.358	3.84869e-25	1.02392e-23	DEG
ENSG00000128342.4	LIF	protein_coding	708.233	3.43659	0.235536	10.3449	4.41459e-25	1.17275e-23	DEG
ENSG00000165795.16	NDRG2	protein_coding	241.022	5.00671	0.38742	10.342	4.5474e-25	1.20626e-23	DEG
ENSG00000138670.12	RASGEF1B	protein_coding	181.545	7.37633	0.616564	10.3417	4.5634e-25	1.20873e-23	DEG
ENSG00000131015.4	ULBP2	protein_coding	1278.15	2.44283	0.139777	10.3224	5.58382e-25	1.47686e-23	DEG
ENSG00000265962.1	RP11-674N23.1	antisense	208.789	-7.00237	0.581573	-10.3209	5.66743e-25	1.49678e-23	DEG
ENSG00000035862.8	TIMP2	protein_coding	14817.1	-1.77916	0.0756572	-10.2985	7.15322e-25	1.88643e-23	DEG
ENSG00000130204.8	TOMM40	protein_coding	10221.8	1.83483	0.0810716	10.2975	7.2332e-25	1.90474e-23	DEG
ENSG00000123329.13	ARHGAP9	protein_coding	200.963	4.98016	0.386885	10.2877	8.00719e-25	2.10549e-23	DEG
ENSG00000124102.4	PI3	protein_coding	255.916	8.03236	0.686759	10.2399	1.31329e-24	3.44829e-23	DEG
ENSG00000148798.5	INA	protein_coding	1270.72	2.55854	0.152616	10.2122	1.74909e-24	4.58591e-23	DEG
ENSG00000026103.15	FAS	protein_coding	3794.62	-1.9471	0.0927902	-10.2069	1.84594e-24	4.83284e-23	DEG
ENSG00000144824.15	PHLDB2	protein_coding	5630.75	-1.88132	0.0864017	-10.2002	1.97772e-24	5.17037e-23	DEG
ENSG00000171055.10	FEZ2	protein_coding	2716.7	-2.18469	0.116307	-10.1859	2.29132e-24	5.98158e-23	DEG
ENSG00000135069.9	PSAT1	protein_coding	1897.67	-2.23951	0.122172	-10.1456	3.46581e-24	9.03458e-23	DEG
ENSG00000133321.6	RARRES3	protein_coding	482.91	-3.46565	0.243272	-10.1354	3.84893e-24	1.00189e-22	DEG
ENSG00000119943.6	PYROXD2	protein_coding	409.388	-4.26781	0.322483	-10.1333	3.93213e-24	1.02207e-22	DEG
ENSG00000111186.8	WNT5B	protein_coding	3438.48	-1.9797	0.096749	-10.1262	4.22612e-24	1.09691e-22	DEG
ENSG00000134352.15	IL6ST	protein_coding	86121.9	-1.67968	0.0671539	-10.1212	4.4476e-24	1.15274e-22	DEG
ENSG00000185432.10	METTL7A	protein_coding	409.616	-4.62189	0.357857	-10.1211	4.45565e-24	1.15318e-22	DEG
ENSG00000101265.11	RASSF2	protein_coding	1679.86	-2.49803	0.148084	-10.1161	4.68806e-24	1.21159e-22	DEG
ENSG00000135046.9	ANXA1	protein_coding	33583.4	-1.70935	0.0703726	-10.0799	6.77915e-24	1.74952e-22	DEG
ENSG00000137868.14	STRA6	protein_coding	1847.05	-2.57487	0.156458	-10.0658	7.82499e-24	2.01655e-22	DEG
ENSG00000241399.2	CD302	protein_coding	1236.87	-2.40707	0.13998	-10.052	9.00495e-24	2.31733e-22	DEG
ENSG00000183421.7	RIPK4	protein_coding	236.442	4.75163	0.373954	10.0323	1.09895e-23	2.82403e-22	DEG
ENSG00000117226.7	GBP3	protein_coding	435.083	-3.58191	0.257415	-10.0302	1.12331e-23	2.88254e-22	DEG
ENSG00000179403.10	VWA1	protein_coding	569.914	3.03851	0.203886	9.99828	1.55069e-23	3.9736e-22	DEG
ENSG00000164619.4	BMPER	protein_coding	364.624	-3.67504	0.26772	-9.99196	1.65287e-23	4.22943e-22	DEG
ENSG00000131409.8	LRRC4B	protein_coding	194.216	5.63373	0.463844	9.98985	1.68845e-23	4.31437e-22	DEG
ENSG00000155254.8	MARVELD1	protein_coding	3785.66	-2.2239	0.122524	-9.98911	1.70103e-23	4.34039e-22	DEG
ENSG00000128422.11	KRT17	protein_coding	550.569	-3.1537	0.215795	-9.98032	1.85869e-23	4.73599e-22	DEG
ENSG00000102934.5	PLLP	protein_coding	206.789	5.45403	0.447051	9.96314	2.20978e-23	5.62267e-22	DEG
ENSG00000155629.10	PIK3AP1	protein_coding	205.537	7.11416	0.614599	9.94821	2.56762e-23	6.524e-22	DEG
ENSG00000176771.11	NCKAP5	protein_coding	337.237	-3.80533	0.282734	-9.92216	3.33465e-23	8.46104e-22	DEG
ENSG00000155511.13	GRIA1	protein_coding	252.252	-5.25502	0.42923	-9.91313	3.65023e-23	9.24878e-22	DEG
ENSG00000163626.12	COX18	protein_coding	992.884	-2.51938	0.153287	-9.91199	3.69219e-23	9.34201e-22	DEG
ENSG00000047849.17	MAP4	protein_coding	12439.5	-1.71699	0.0724022	-9.9029	4.04378e-23	1.02173e-21	DEG
ENSG00000256309.1	AC009469.1	pseudogene	208.63	-7.859	0.694545	-9.87553	5.31497e-23	1.34105e-21	DEG
ENSG00000104689.5	TNFRSF10A	protein_coding	798.276	2.67893	0.170197	9.86459	5.92734e-23	1.49347e-21	DEG
ENSG00000122952.12	ZWINT	protein_coding	2337.16	2.07179	0.108807	9.85036	6.8296e-23	1.71842e-21	DEG
ENSG00000185532.10	PRKG1	protein_coding	3502.64	-1.97337	0.098869	-9.8451	7.19681e-23	1.8083e-21	DEG
ENSG00000139304.8	PTPRQ	protein_coding	245.284	-4.36703	0.342134	-9.84125	7.47736e-23	1.87359e-21	DEG
ENSG00000188763.3	FZD9	protein_coding	437.917	3.46612	0.250588	9.84135	7.46989e-23	1.87359e-21	DEG
ENSG00000112559.9	MDFI	protein_coding	184.123	6.0287	0.511018	9.84055	7.52993e-23	1.88415e-21	DEG
ENSG00000120738.7	EGR1	protein_coding	274.065	-3.98584	0.304269	-9.81316	9.88226e-23	2.46934e-21	DEG
ENSG00000138119.12	MYOF	protein_coding	16709	-1.73341	0.0747553	-9.81075	1.01214e-22	2.52559e-21	DEG
ENSG00000167074.10	TEF	protein_coding	957.77	-2.52731	0.155716	-9.80827	1.03733e-22	2.58489e-21	DEG
ENSG00000179292.4	TMEM151A	protein_coding	198.018	7.0573	0.617733	9.80569	1.06417e-22	2.64812e-21	DEG
ENSG00000170006.7	TMEM154	protein_coding	1732.43	-2.22977	0.125612	-9.7902	1.24045e-22	3.08255e-21	DEG
ENSG00000180190.7	TDRP	protein_coding	1115.74	2.65268	0.1689	9.78498	1.30621e-22	3.24152e-21	DEG
ENSG00000178726.6	THBD	protein_coding	193.893	7.03535	0.617022	9.78141	1.3531e-22	3.35327e-21	DEG
ENSG00000087116.9	ADAMTS2	protein_coding	3593.07	-2.05014	0.107378	-9.77982	1.37453e-22	3.40173e-21	DEG
ENSG00000019991.11	HGF	protein_coding	170.734	-6.47693	0.560342	-9.77426	1.4521e-22	3.5888e-21	DEG
ENSG00000185664.10	PMEL	protein_coding	450.641	3.66533	0.2727	9.77384	1.45818e-22	3.5989e-21	DEG
ENSG00000188211.4	NCR3LG1	protein_coding	1604.34	2.54145	0.157756	9.77111	1.49805e-22	3.69226e-21	DEG
ENSG00000253276.1	CCDC71L	protein_coding	4710.62	-1.87907	0.0900038	-9.76707	1.55893e-22	3.83709e-21	DEG
ENSG00000128604.14	IRF5	protein_coding	189.252	6.53522	0.568078	9.74376	1.96155e-22	4.82153e-21	DEG
ENSG00000005513.9	SOX8	protein_coding	259.188	4.17456	0.325838	9.74278	1.98064e-22	4.86183e-21	DEG
ENSG00000198121.9	LPAR1	protein_coding	5651.36	-1.81714	0.0839378	-9.73502	2.13767e-22	5.24019e-21	DEG
ENSG00000164620.4	RELL2	protein_coding	1538.63	2.32708	0.136393	9.72985	2.24926e-22	5.50628e-21	DEG
ENSG00000164099.3	PRSS12	protein_coding	1303	-2.60514	0.164988	-9.72882	2.27216e-22	5.55483e-21	DEG
ENSG00000183186.6	C2CD4C	protein_coding	301.241	4.2477	0.334036	9.7226	2.41531e-22	5.89681e-21	DEG
ENSG00000119547.5	ONECUT2	protein_coding	195.48	5.52085	0.465033	9.72156	2.44026e-22	5.94969e-21	DEG
ENSG00000124098.9	FAM210B	protein_coding	4108.68	-1.96431	0.0992129	-9.71956	2.48866e-22	6.05953e-21	DEG
ENSG00000162409.6	PRKAA2	protein_coding	1722.01	2.40142	0.1442	9.71853	2.51389e-22	6.11274e-21	DEG
ENSG00000126785.8	RHOJ	protein_coding	1450.68	-2.40575	0.144676	-9.71653	2.56364e-22	6.22533e-21	DEG
ENSG00000184898.6	RBM43	protein_coding	618.883	-2.92773	0.19841	-9.7159	2.57957e-22	6.25563e-21	DEG
ENSG00000178202.8	KDELC2	protein_coding	3828.52	-1.90806	0.0934697	-9.71505	2.60125e-22	6.29977e-21	DEG
ENSG00000131094.3	C1QL1	protein_coding	191.543	5.58793	0.472372	9.71254	2.66606e-22	6.44809e-21	DEG
ENSG00000142552.3	RCN3	protein_coding	5562.51	-1.82787	0.0854716	-9.68586	3.46285e-22	8.364e-21	DEG
ENSG00000170581.9	STAT2	protein_coding	4978.62	-2.01242	0.104541	-9.68445	3.51078e-22	8.46846e-21	DEG
ENSG00000132465.6	IGJ	protein_coding	654.349	-2.81385	0.187339	-9.68218	3.58984e-22	8.64764e-21	DEG
ENSG00000166396.8	SERPINB7	protein_coding	1393.98	-2.62548	0.168253	-9.66092	4.41888e-22	1.06306e-20	DEG
ENSG00000166823.5	MESP1	protein_coding	487.698	3.26743	0.234758	9.65859	4.52034e-22	1.08602e-20	DEG
ENSG00000168502.13	SOGA2	protein_coding	1912.5	-2.36786	0.141701	-9.65315	4.76676e-22	1.14371e-20	DEG
ENSG00000178685.9	PARP10	protein_coding	769.735	-2.90679	0.19754	-9.65264	4.79082e-22	1.14796e-20	DEG
ENSG00000134709.6	HOOK1	protein_coding	178.914	6.26742	0.545943	9.6483	4.99791e-22	1.196e-20	DEG
ENSG00000122870.7	BICC1	protein_coding	5956.48	-1.89126	0.0924081	-9.64486	5.16841e-22	1.23516e-20	DEG
ENSG00000168016.9	TRANK1	protein_coding	605.961	-2.88357	0.195465	-9.63637	5.614e-22	1.33988e-20	DEG
ENSG00000143195.8	ILDR2	protein_coding	161.778	6.76522	0.598429	9.63392	5.74949e-22	1.37041e-20	DEG
ENSG00000105173.9	CCNE1	protein_coding	1380.85	2.48102	0.153762	9.63192	5.86238e-22	1.39548e-20	DEG
ENSG00000138448.7	ITGAV	protein_coding	23737.2	-1.91841	0.0953733	-9.62963	5.99475e-22	1.42511e-20	DEG
ENSG00000176971.2	FIBIN	protein_coding	465.251	-3.40727	0.250111	-9.6248	6.28276e-22	1.49162e-20	DEG
ENSG00000180776.11	ZDHHC20	protein_coding	2953.15	-2.05342	0.109467	-9.6231	6.38768e-22	1.51454e-20	DEG
ENSG00000167536.9	DHRS13	protein_coding	662.264	2.79206	0.186253	9.62165	6.47831e-22	1.53402e-20	DEG
ENSG00000135127.7	CCDC64	protein_coding	171.215	6.53224	0.575468	9.61345	7.01573e-22	1.6591e-20	DEG
ENSG00000269728.1	RP11-145M9.4	lincRNA	1351.23	-2.45595	0.151741	-9.59497	8.39432e-22	1.98253e-20	DEG
ENSG00000147231.9	CXorf57	protein_coding	192.684	5.01547	0.418507	9.59475	8.41201e-22	1.98412e-20	DEG
ENSG00000113657.8	DPYSL3	protein_coding	3743.32	-2.08402	0.113232	-9.57345	1.03394e-21	2.43554e-20	DEG
ENSG00000139438.5	FAM222A	protein_coding	332.111	3.85026	0.297965	9.56573	1.11407e-21	2.6209e-20	DEG
ENSG00000198948.7	MFAP3L	protein_coding	672.586	3.21908	0.232092	9.56119	1.16415e-21	2.73516e-20	DEG
ENSG00000110031.8	LPXN	protein_coding	2264.13	-2.29219	0.135315	-9.54952	1.30299e-21	3.05737e-20	DEG
ENSG00000181284.2	TMEM102	protein_coding	575.028	3.18464	0.229044	9.53809	1.45486e-21	3.40931e-20	DEG
ENSG00000122176.10	FMOD	protein_coding	3760.17	-1.94263	0.0988536	-9.53562	1.48995e-21	3.48702e-20	DEG
ENSG00000184575.7	XPOT	protein_coding	21915.8	-1.66215	0.0695451	-9.52112	1.71322e-21	4.00439e-20	DEG
ENSG00000006432.11	MAP3K9	protein_coding	454.699	3.97215	0.312275	9.51774	1.76993e-21	4.13158e-20	DEG
ENSG00000109861.11	CTSC	protein_coding	10688.1	-1.7111	0.0747589	-9.51197	1.87091e-21	4.36168e-20	DEG
ENSG00000153714.5	LURAP1L	protein_coding	1031.94	-3.07341	0.218129	-9.50542	1.99249e-21	4.63915e-20	DEG
ENSG00000184160.6	ADRA2C	protein_coding	262.668	4.11219	0.327461	9.50398	2.02016e-21	4.69752e-20	DEG
ENSG00000048052.17	HDAC9	protein_coding	1746.15	2.16046	0.12242	9.47935	2.55865e-21	5.94204e-20	DEG
ENSG00000154175.12	ABI3BP	protein_coding	466.532	-3.20738	0.232908	-9.47747	2.60511e-21	6.04219e-20	DEG
ENSG00000144455.9	SUMF1	protein_coding	2349.11	-2.02281	0.108003	-9.47013	2.79484e-21	6.47394e-20	DEG
ENSG00000128683.9	GAD1	protein_coding	131.126	6.61787	0.595036	9.44123	3.68441e-21	8.52361e-20	DEG
ENSG00000169507.5	SLC38A11	protein_coding	1307.49	-5.69336	0.497186	-9.43985	3.73316e-21	8.62536e-20	DEG
ENSG00000174564.8	IL20RB	protein_coding	268.328	-3.87988	0.305184	-9.43652	3.8535e-21	8.89204e-20	DEG
ENSG00000124302.8	CHST8	protein_coding	166.444	6.37959	0.570118	9.43593	3.87549e-21	8.9314e-20	DEG
ENSG00000168003.12	SLC3A2	protein_coding	41477.8	1.6884	0.0730427	9.42463	4.31616e-21	9.93431e-20	DEG
ENSG00000180730.4	SHISA2	protein_coding	217.53	4.50678	0.372336	9.41831	4.58423e-21	1.05379e-19	DEG
ENSG00000132274.11	TRIM22	protein_coding	5991.75	-4.4946	0.371466	-9.40759	5.0765e-21	1.16547e-19	DEG
ENSG00000133794.13	ARNTL	protein_coding	1199.72	2.5667	0.166723	9.397	5.61405e-21	1.28725e-19	DEG
ENSG00000134215.11	VAV3	protein_coding	345.856	3.55113	0.271876	9.38343	6.38625e-21	1.46245e-19	DEG
ENSG00000204642.9	HLA-F	protein_coding	4429.71	1.9081	0.0968741	9.37402	6.98205e-21	1.59687e-19	DEG
ENSG00000270149.1	F11R	protein_coding	186.164	7.59209	0.704664	9.35493	8.36515e-21	1.91078e-19	DEG
ENSG00000137259.2	HIST1H2AB	protein_coding	1814.02	-2.45494	0.155568	-9.35242	8.56654e-21	1.95432e-19	DEG
ENSG00000068489.8	PRR11	protein_coding	1063.56	-2.39956	0.149983	-9.33144	1.04447e-20	2.37978e-19	DEG
ENSG00000158457.4	TSPAN33	protein_coding	223.909	4.70041	0.396743	9.32698	1.0893e-20	2.47882e-19	DEG
ENSG00000105327.11	BBC3	protein_coding	1106.26	-2.46491	0.157184	-9.31969	1.16682e-20	2.65189e-19	DEG
ENSG00000185269.7	NOTUM	protein_coding	164.006	6.40486	0.580781	9.30619	1.32496e-20	3.00752e-19	DEG
ENSG00000136044.7	APPL2	protein_coding	4591.15	-1.89969	0.0966963	-9.30431	1.34869e-20	3.05753e-19	DEG
ENSG00000095752.2	IL11	protein_coding	1290.47	2.27482	0.137145	9.29545	1.4658e-20	3.31886e-19	DEG
ENSG00000170989.8	S1PR1	protein_coding	714.754	2.75373	0.188814	9.28815	1.57001e-20	3.55037e-19	DEG
ENSG00000177694.10	NAALADL2	protein_coding	592.726	-3.14865	0.232028	-9.2603	2.03862e-20	4.60434e-19	DEG
ENSG00000118473.17	SGIP1	protein_coding	624.083	-2.82534	0.19722	-9.25532	2.13591e-20	4.81805e-19	DEG
ENSG00000168679.13	SLC16A4	protein_coding	2851.88	-1.97852	0.10573	-9.25485	2.14535e-20	4.83331e-19	DEG
ENSG00000135114.8	OASL	protein_coding	177.485	5.34727	0.470574	9.23825	2.50571e-20	5.63816e-19	DEG
ENSG00000105048.12	TNNT1	protein_coding	451.39	3.40207	0.260179	9.23237	2.64699e-20	5.94866e-19	DEG
ENSG00000179913.6	B3GNT3	protein_coding	179.291	7.53303	0.707671	9.23173	2.663e-20	5.9772e-19	DEG
ENSG00000131668.9	BARX1	protein_coding	171.766	6.32348	0.576703	9.2309	2.68374e-20	6.01631e-19	DEG
ENSG00000133863.2	TEX15	protein_coding	1737.12	2.2987	0.14095	9.2139	3.14476e-20	7.04106e-19	DEG
ENSG00000235513.1	RP4-756G23.5	antisense	137.823	-6.03262	0.546379	-9.21085	3.23552e-20	7.23533e-19	DEG
ENSG00000101310.10	SEC23B	protein_coding	2667.57	1.96346	0.104632	9.20813	3.31842e-20	7.41154e-19	DEG
ENSG00000175591.7	P2RY2	protein_coding	167.485	7.09646	0.662656	9.20004	3.57827e-20	7.98205e-19	DEG
ENSG00000127083.7	OMD	protein_coding	162.792	-7.51754	0.708515	-9.19887	3.61738e-20	8.05935e-19	DEG
ENSG00000184384.9	MAML2	protein_coding	1817.92	-2.10468	0.12009	-9.19872	3.62225e-20	8.06028e-19	DEG
ENSG00000175084.7	DES	protein_coding	678.647	2.73158	0.188565	9.18291	4.19596e-20	9.32545e-19	DEG
ENSG00000205413.3	SAMD9	protein_coding	6093.48	-1.75685	0.0824254	-9.18225	4.22194e-20	9.37167e-19	DEG
ENSG00000166592.7	RRAD	protein_coding	518.273	3.34449	0.255855	9.16333	5.03185e-20	1.11558e-18	DEG
ENSG00000115232.9	ITGA4	protein_coding	2941.53	-2.18213	0.129098	-9.15682	5.34494e-20	1.18267e-18	DEG
ENSG00000197712.7	FAM114A1	protein_coding	10272.7	-1.8173	0.0892568	-9.15677	5.34754e-20	1.18267e-18	DEG
ENSG00000114779.15	ABHD14B	protein_coding	1701.36	-2.14871	0.125484	-9.15426	5.473e-20	1.20894e-18	DEG
ENSG00000169047.5	IRS1	protein_coding	1501.8	-2.18978	0.13	-9.1522	5.57853e-20	1.23075e-18	DEG
ENSG00000243509.4	TNFRSF6B	protein_coding	160.922	-7.49508	0.709962	-9.14849	5.77351e-20	1.27221e-18	DEG
ENSG00000070159.9	PTPN3	protein_coding	881.104	2.63881	0.179213	9.14449	5.99125e-20	1.31858e-18	DEG
ENSG00000150093.14	ITGB1	protein_coding	21602.6	-2.09346	0.119635	-9.13997	6.24701e-20	1.3732e-18	DEG
ENSG00000272599.1	RP11-152N13.16	antisense	303.591	3.78231	0.305135	9.11828	7.63275e-20	1.67578e-18	DEG
ENSG00000213722.4	DDAH2	protein_coding	665.629	-2.66647	0.182908	-9.11102	8.16143e-20	1.78968e-18	DEG
ENSG00000004776.7	HSPB6	protein_coding	223.011	-4.09979	0.340411	-9.10602	8.54574e-20	1.86942e-18	DEG
ENSG00000141384.7	TAF4B	protein_coding	1355.51	2.80793	0.198542	9.10606	8.54275e-20	1.86942e-18	DEG
ENSG00000141756.14	FKBP10	protein_coding	24580.4	-1.66757	0.0736049	-9.0697	1.19344e-19	2.60755e-18	DEG
ENSG00000159212.8	CLIC6	protein_coding	161.732	5.35388	0.480403	9.06298	1.26939e-19	2.77015e-18	DEG
ENSG00000183655.11	KLHL25	protein_coding	1482.53	2.27204	0.140419	9.05892	1.31754e-19	2.87175e-18	DEG
ENSG00000169291.5	SHE	protein_coding	149.764	6.28225	0.583339	9.0552	1.36316e-19	2.96761e-18	DEG
ENSG00000162512.11	SDC3	protein_coding	4998.35	-1.96528	0.106609	-9.05441	1.37307e-19	2.9856e-18	DEG
ENSG00000147180.12	ZNF711	protein_coding	177.588	5.94804	0.546554	9.05316	1.38886e-19	3.01631e-18	DEG
ENSG00000171126.7	KCNG3	protein_coding	158.81	6.48771	0.606293	9.05125	1.41346e-19	3.06606e-18	DEG
ENSG00000144381.12	HSPD1	protein_coding	22442.9	1.61555	0.0680841	9.04095	1.55315e-19	3.36504e-18	DEG
ENSG00000188483.6	IER5L	protein_coding	3422.28	-1.91624	0.101371	-9.03849	1.58854e-19	3.43759e-18	DEG
ENSG00000150593.11	PDCD4	protein_coding	572.778	-2.89839	0.210649	-9.01211	2.02123e-19	4.36871e-18	DEG
ENSG00000116661.9	FBXO2	protein_coding	707.345	2.8424	0.20445	9.01149	2.03267e-19	4.38818e-18	DEG
ENSG00000129103.13	SUMF2	protein_coding	9555.14	-1.7346	0.0815371	-9.00944	2.07118e-19	4.46599e-18	DEG
ENSG00000106723.12	SPIN1	protein_coding	9968.37	-1.73568	0.0816689	-9.00808	2.09694e-19	4.51615e-18	DEG
ENSG00000229124.2	VIM-AS1	antisense	2565.74	-2.45328	0.161385	-9.00504	2.15593e-19	4.63768e-18	DEG
ENSG00000162545.5	CAMK2N1	protein_coding	3461.83	-1.91633	0.101769	-9.00404	2.17562e-19	4.67448e-18	DEG
ENSG00000150540.9	HNMT	protein_coding	785.568	-3.43253	0.270594	-8.98957	2.48198e-19	5.3264e-18	DEG
ENSG00000203727.3	SAMD5	protein_coding	527.485	-3.16038	0.240373	-8.98762	2.5264e-19	5.4153e-18	DEG
ENSG00000179954.10	SSC5D	protein_coding	655.218	-3.21061	0.24599	-8.98658	2.55041e-19	5.46029e-18	DEG
ENSG00000187790.6	FANCM	protein_coding	2868.98	2.01031	0.112436	8.98567	2.57151e-19	5.49896e-18	DEG
UL120	UL120	CMV	159.618	7.39183	0.712141	8.97551	2.82046e-19	6.02419e-18	DEG
ENSG00000173110.6	HSPA6	protein_coding	185.807	5.06985	0.453816	8.96807	3.01754e-19	6.43753e-18	DEG
ENSG00000138798.7	EGF	protein_coding	134.743	-5.34146	0.484126	-8.96762	3.02989e-19	6.45628e-18	DEG
ENSG00000182667.10	NTM	protein_coding	479.148	-3.29323	0.255936	-8.96018	3.24153e-19	6.89911e-18	DEG
ENSG00000145349.12	CAMK2D	protein_coding	7282.63	-1.75912	0.0847693	-8.95515	3.39274e-19	7.21246e-18	DEG
ENSG00000163590.9	PPM1L	protein_coding	536.202	3.34282	0.261713	8.95184	3.496e-19	7.42325e-18	DEG
ENSG00000221869.4	CEBPD	protein_coding	2115.05	-2.16322	0.129987	-8.94875	3.59515e-19	7.62484e-18	DEG
ENSG00000133878.4	DUSP26	protein_coding	153.201	5.99142	0.557937	8.9462	3.67915e-19	7.79385e-18	DEG
ENSG00000121743.3	GJA3	protein_coding	184.7	4.69235	0.413045	8.93934	3.91515e-19	8.28409e-18	DEG
ENSG00000138347.11	MYPN	protein_coding	393.099	-3.52944	0.283006	-8.93777	3.97104e-19	8.39253e-18	DEG
ENSG00000172375.8	C2CD2L	protein_coding	1303.52	2.26703	0.141782	8.93648	4.01769e-19	8.48122e-18	DEG
ENSG00000117595.6	IRF6	protein_coding	295.912	4.49524	0.391521	8.92734	4.36393e-19	9.20139e-18	DEG
ENSG00000088756.8	ARHGAP28	protein_coding	911.057	-2.47595	0.165536	-8.91614	4.82812e-19	1.01683e-17	DEG
ENSG00000188910.7	GJB3	protein_coding	153.427	5.98475	0.559273	8.91292	4.97039e-19	1.04557e-17	DEG
ENSG00000133101.5	CCNA1	protein_coding	243.237	4.19456	0.358765	8.90432	5.37135e-19	1.12861e-17	DEG
ENSG00000140557.7	ST8SIA2	protein_coding	154.459	7.34037	0.714801	8.87012	7.30665e-19	1.53346e-17	DEG
ENSG00000156113.16	KCNMA1	protein_coding	1818.3	-2.15827	0.130594	-8.86921	7.36638e-19	1.54421e-17	DEG
ENSG00000104213.8	PDGFRL	protein_coding	381.629	-3.30219	0.259713	-8.86435	7.69489e-19	1.61121e-17	DEG
ENSG00000142700.7	DMRTA2	protein_coding	151.238	6.62466	0.634882	8.85938	8.04592e-19	1.68276e-17	DEG
ENSG00000075624.9	ACTB	protein_coding	66083.6	-1.56352	0.063677	-8.84965	8.77977e-19	1.83412e-17	DEG
ENSG00000163171.6	CDC42EP3	protein_coding	1190.44	-2.35753	0.154103	-8.80923	1.26012e-18	2.62939e-17	DEG
ENSG00000258818.2	RNASE4	protein_coding	1421.17	-2.25266	0.142252	-8.80593	1.29776e-18	2.70481e-17	DEG
ENSG00000198794.7	SCAMP5	protein_coding	436.917	3.10442	0.239007	8.80486	1.31014e-18	2.72748e-17	DEG
ENSG00000168140.4	VASN	protein_coding	3480.27	-2.05138	0.119554	-8.79421	1.44056e-18	2.99554e-17	DEG
ENSG00000203618.5	GP1BB	protein_coding	148.184	7.28818	0.71665	8.77441	1.71798e-18	3.5683e-17	DEG
ENSG00000081923.6	ATP8B1	protein_coding	6038.02	-1.91791	0.104813	-8.75757	1.99508e-18	4.1391e-17	DEG
ENSG00000179294.5	C17orf96	protein_coding	255.161	4.72376	0.425359	8.7544	2.05199e-18	4.25229e-17	DEG
ENSG00000091622.11	PITPNM3	protein_coding	324.565	3.37776	0.271712	8.75103	2.11411e-18	4.376e-17	DEG
ENSG00000138821.8	SLC39A8	protein_coding	5481.27	1.7628	0.0871719	8.75049	2.1243e-18	4.39209e-17	DEG
ENSG00000144583.4	MARCH4	protein_coding	680.667	-3.10798	0.241121	-8.74239	2.28233e-18	4.71343e-17	DEG
ENSG00000223485.1	RP11-417E7.1	lincRNA	311.808	-3.56657	0.294153	-8.72529	2.655e-18	5.47681e-17	DEG
ENSG00000164237.4	CMBL	protein_coding	882.14	-2.6207	0.185945	-8.71606	2.88058e-18	5.93537e-17	DEG
ENSG00000189129.9	PLAC9	protein_coding	818.997	-2.65379	0.189977	-8.7052	3.1702e-18	6.52469e-17	DEG
ENSG00000149948.9	HMGA2	protein_coding	728.096	-2.94383	0.223392	-8.70145	3.27656e-18	6.73594e-17	DEG
ENSG00000108797.7	CNTNAP1	protein_coding	1288.63	-2.30461	0.150032	-8.69554	3.45187e-18	7.08829e-17	DEG
ENSG00000144015.4	TRIM43	protein_coding	138.937	6.84627	0.674484	8.66777	4.40664e-18	9.0386e-17	DEG
ENSG00000211445.7	GPX3	protein_coding	297.994	3.67507	0.309018	8.65669	4.85671e-18	9.95048e-17	DEG
ENSG00000117586.6	TNFSF4	protein_coding	194.251	-4.32843	0.384557	-8.65525	4.91837e-18	1.00654e-16	DEG
ENSG00000091651.4	ORC6	protein_coding	1799.2	2.03704	0.119873	8.65114	5.0986e-18	1.04225e-16	DEG
ENSG00000135378.3	PRRG4	protein_coding	146.317	5.30934	0.498492	8.64476	5.39165e-18	1.10091e-16	DEG
ENSG00000156508.13	EEF1A1	protein_coding	828725	-1.5283	0.0611476	-8.63982	5.63007e-18	1.14829e-16	DEG
ENSG00000197106.6	SLC6A17	protein_coding	204.115	4.21287	0.372645	8.62178	6.59219e-18	1.34301e-16	DEG
ENSG00000133107.10	TRPC4	protein_coding	715.497	-2.5913	0.184573	-8.62153	6.60649e-18	1.34441e-16	DEG
ENSG00000011426.6	ANLN	protein_coding	9608.55	-1.73631	0.0854142	-8.62044	6.66997e-18	1.3558e-16	DEG
ENSG00000184012.7	TMPRSS2	protein_coding	139.151	7.20201	0.720329	8.60997	7.30805e-18	1.48384e-16	DEG
ENSG00000146859.6	TMEM140	protein_coding	552.48	-2.83925	0.214622	-8.56972	1.03734e-17	2.10388e-16	DEG
ENSG00000135750.10	KCNK1	protein_coding	998.128	2.33241	0.155527	8.56706	1.06162e-17	2.15071e-16	DEG
UL137	UL137	CMV	137.706	7.18177	0.721648	8.56618	1.06978e-17	2.16481e-16	DEG
UL148A	UL148A	CMV	137.101	7.17837	0.721593	8.56213	1.10805e-17	2.23974e-16	DEG
ENSG00000158528.7	PPP1R9A	protein_coding	731.909	2.96208	0.229201	8.56054	1.12344e-17	2.26832e-16	DEG
ENSG00000143476.13	DTL	protein_coding	4055.56	2.10689	0.129433	8.55184	1.21142e-17	2.44324e-16	DEG
ENSG00000232855.2	AF131217.1	lincRNA	124.662	-6.25585	0.615925	-8.53325	1.42289e-17	2.86655e-16	DEG
ENSG00000122641.9	INHBA	protein_coding	997.61	-2.32254	0.155076	-8.5283	1.48512e-17	2.98858e-16	DEG
ENSG00000187094.7	CCK	protein_coding	131.541	6.47327	0.642951	8.51273	1.69878e-17	3.41475e-16	DEG
ENSG00000100968.9	NFATC4	protein_coding	5392	-1.77375	0.0910079	-8.50201	1.86337e-17	3.74142e-16	DEG
RL1	RL1	CMV	135.335	7.14895	0.723739	8.49609	1.96082e-17	3.93274e-16	DEG
ENSG00000131941.3	RHPN2	protein_coding	715.924	2.61755	0.190565	8.48817	2.09925e-17	4.2057e-16	DEG
ENSG00000149571.6	KIRREL3	protein_coding	550.972	-3.44696	0.288451	-8.48311	2.19258e-17	4.38783e-16	DEG
ENSG00000120129.5	DUSP1	protein_coding	4155.88	-1.88204	0.104056	-8.4766	2.31871e-17	4.63512e-16	DEG
ENSG00000089157.11	RPLP0	protein_coding	144612	-1.58319	0.0688143	-8.47477	2.35542e-17	4.70329e-16	DEG
ENSG00000170837.2	GPR27	protein_coding	130.078	6.45157	0.64347	8.47214	2.4093e-17	4.80559e-16	DEG
ENSG00000232274.2	RP11-782C8.2	lincRNA	89.8951	-6.58537	0.659717	-8.46631	2.53284e-17	5.04642e-16	DEG
ENSG00000180573.8	HIST1H2AC	protein_coding	12241.7	-1.81391	0.0962283	-8.45811	2.71735e-17	5.4081e-16	DEG
ENSG00000198300.8	PEG3	protein_coding	132.277	6.78017	0.684502	8.44434	3.05758e-17	6.07854e-16	DEG
ENSG00000118515.7	SGK1	protein_coding	4121.93	-2.07294	0.127117	-8.44063	3.15639e-17	6.26808e-16	DEG
ENSG00000180875.4	GREM2	protein_coding	172.476	-4.53328	0.419261	-8.4274	3.53421e-17	7.01068e-16	DEG
ENSG00000172061.7	LRRC15	protein_coding	413.228	-2.96437	0.233335	-8.41866	3.80826e-17	7.54603e-16	DEG
ENSG00000113448.12	PDE4D	protein_coding	2564.71	1.99207	0.1179	8.41448	3.94639e-17	7.81117e-16	DEG
ENSG00000082438.11	COBLL1	protein_coding	2542.91	-1.95641	0.113666	-8.41417	3.95671e-17	7.82304e-16	DEG
UL3	UL3	CMV	129.774	7.10029	0.725168	8.41225	4.0223e-17	7.94405e-16	DEG
ENSG00000187764.7	SEMA4D	protein_coding	427.863	3.07817	0.247079	8.41097	4.06631e-17	8.0222e-16	DEG
ENSG00000141574.3	SECTM1	protein_coding	3022.47	-2.2105	0.14399	-8.40679	4.21377e-17	8.30406e-16	DEG
ENSG00000160469.12	BRSK1	protein_coding	1248.24	2.32229	0.157699	8.38494	5.07519e-17	9.99079e-16	DEG
ENSG00000107954.6	NEURL	protein_coding	323.126	3.34428	0.27976	8.37962	5.30969e-17	1.0441e-15	DEG
ENSG00000112118.13	MCM3	protein_coding	11508.9	1.69264	0.0826816	8.37718	5.42086e-17	1.06365e-15	DEG
ENSG00000119616.7	FCF1	protein_coding	1888.23	-2.17804	0.140624	-8.37724	5.4181e-17	1.06365e-15	DEG
ENSG00000134294.9	SLC38A2	protein_coding	43469.1	-1.56394	0.0674534	-8.36045	6.24814e-17	1.22465e-15	DEG
ENSG00000213694.3	S1PR3	protein_coding	8777.39	-1.65821	0.078753	-8.35786	6.38666e-17	1.25044e-15	DEG
ENSG00000144868.9	TMEM108	protein_coding	129.964	7.08057	0.72756	8.35748	6.40733e-17	1.25314e-15	DEG
ENSG00000163536.8	SERPINI1	protein_coding	355.829	3.11595	0.253276	8.35432	6.5811e-17	1.28573e-15	DEG
UL142	UL142	CMV	128.839	7.07485	0.727437	8.35103	6.76723e-17	1.32067e-15	DEG
ENSG00000140403.8	DNAJA4	protein_coding	334.639	3.6527	0.317824	8.34646	7.03376e-17	1.3712e-15	DEG
ENSG00000136546.9	SCN7A	protein_coding	133.229	-4.81828	0.457766	-8.3411	7.3604e-17	1.43334e-15	DEG
ENSG00000049246.10	PER3	protein_coding	641.569	-2.63411	0.196206	-8.32852	8.1859e-17	1.59238e-15	DEG
ENSG00000169594.8	BNC1	protein_coding	468.817	2.89632	0.227732	8.32702	8.29056e-17	1.611e-15	DEG
ENSG00000141441.11	GAREM	protein_coding	250.333	3.68988	0.323148	8.32398	8.50554e-17	1.65101e-15	DEG
ENSG00000253293.3	HOXA10	protein_coding	2854.6	-1.86783	0.104331	-8.31805	8.94228e-17	1.73392e-15	DEG
ENSG00000176974.13	SHMT1	protein_coding	1212.06	2.26147	0.151668	8.31732	8.99732e-17	1.74272e-15	DEG
truncated_UL141	truncated UL141	CMV	126.546	7.05168	0.728324	8.30906	9.64649e-17	1.86647e-15	DEG
ENSG00000144668.7	ITGA9	protein_coding	116.693	5.25283	0.51236	8.30047	1.03702e-16	2.00436e-15	DEG
ENSG00000143355.11	LHX9	protein_coding	434.194	-2.97794	0.238463	-8.29456	1.0899e-16	2.10431e-15	DEG
ENSG00000118985.10	ELL2	protein_coding	4275.05	-1.81443	0.098201	-8.29355	1.0992e-16	2.12e-15	DEG
ENSG00000104205.8	SGK3	protein_coding	1545.17	2.04996	0.126721	8.28561	1.1751e-16	2.26398e-15	DEG
ENSG00000180660.6	MAB21L1	protein_coding	351.573	-3.25144	0.271822	-8.28277	1.2034e-16	2.31603e-15	DEG
ENSG00000221852.4	KRTAP1-5	protein_coding	141.602	-4.80869	0.460764	-8.26604	1.38481e-16	2.66233e-15	DEG
ENSG00000244270.1	RPL32P29	pseudogene	114.341	-7.02502	0.730057	-8.2528	1.54722e-16	2.97142e-15	DEG
ENSG00000114631.10	PODXL2	protein_coding	700.158	2.51593	0.183762	8.24942	1.59172e-16	3.05363e-15	DEG
ENSG00000170421.7	KRT8	protein_coding	3119.31	-1.9075	0.110323	-8.22589	1.9374e-16	3.71287e-15	DEG
ENSG00000160588.5	MPZL3	protein_coding	124.051	5.75372	0.578014	8.22422	1.96459e-16	3.76099e-15	DEG
ENSG00000110427.10	KIAA1549L	protein_coding	1665.54	-2.49183	0.181528	-8.21818	2.06608e-16	3.95111e-15	DEG
RL10	RL10	CMV	123.245	7.00488	0.731144	8.21298	2.15764e-16	4.12184e-15	DEG
ENSG00000164684.9	ZNF704	protein_coding	298.904	3.55183	0.310736	8.21222	2.17133e-16	4.14362e-15	DEG
ENSG00000141655.11	TNFRSF11A	protein_coding	127.783	6.30837	0.648065	8.1911	2.5884e-16	4.93432e-15	DEG
ENSG00000198860.7	TSEN15	protein_coding	3021.88	-1.85263	0.104212	-8.18164	2.80003e-16	5.33214e-15	DEG
ENSG00000123358.15	NR4A1	protein_coding	585.156	2.75238	0.214283	8.17786	2.88937e-16	5.49649e-15	DEG
UL121	UL121	CMV	118.228	6.97351	0.730639	8.17574	2.94055e-16	5.58798e-15	DEG
ENSG00000236886.2	AC007563.5	antisense	145.637	-5.52292	0.553636	-8.16949	3.09689e-16	5.8789e-15	DEG
ENSG00000100297.11	MCM5	protein_coding	6437.98	1.67858	0.0830708	8.1687	3.11736e-16	5.91155e-15	DEG
ENSG00000121966.6	CXCR4	protein_coding	117.154	6.30309	0.650132	8.15693	3.43641e-16	6.50975e-15	DEG
ENSG00000216490.3	IFI30	protein_coding	1129.72	2.33321	0.163504	8.15401	3.52064e-16	6.66233e-15	DEG
ENSG00000111452.8	GPR133	protein_coding	1451.8	-2.24266	0.152446	-8.15146	3.59549e-16	6.79687e-15	DEG
ENSG00000144655.10	CSRNP1	protein_coding	2420.63	1.91856	0.11271	8.14971	3.64791e-16	6.88876e-15	DEG
ENSG00000167642.8	SPINT2	protein_coding	2225.57	2.07391	0.131776	8.14952	3.6536e-16	6.89232e-15	DEG
ENSG00000170786.8	SDR16C5	protein_coding	116.996	6.95888	0.731302	8.14831	3.6906e-16	6.95487e-15	DEG
ENSG00000102879.11	CORO1A	protein_coding	385.066	2.96733	0.241527	8.1454	3.78045e-16	7.11676e-15	DEG
ENSG00000156966.6	B3GNT7	protein_coding	125.754	5.57401	0.561935	8.13975	3.96092e-16	7.44876e-15	DEG
ENSG00000123384.9	LRP1	protein_coding	12976.1	-1.96329	0.118737	-8.11275	4.94875e-16	9.29675e-15	DEG
ENSG00000164695.4	CHMP4C	protein_coding	115.314	6.57395	0.687314	8.10976	5.07203e-16	9.51848e-15	DEG
ENSG00000113739.6	STC2	protein_coding	1936.77	-2.24787	0.154198	-8.09262	5.8393e-16	1.0947e-14	DEG
ENSG00000119915.4	ELOVL3	protein_coding	125.958	5.19713	0.518648	8.09244	5.84823e-16	1.09524e-14	DEG
ENSG00000184619.3	KRBA2	protein_coding	227.693	-3.66947	0.330578	-8.07517	6.7384e-16	1.26064e-14	DEG
ENSG00000168913.6	ENHO	protein_coding	179.407	4.13308	0.388217	8.07042	7.00561e-16	1.30928e-14	DEG
ENSG00000166165.8	CKB	protein_coding	1018.63	2.37485	0.17082	8.04852	8.38013e-16	1.56455e-14	DEG
ENSG00000072071.12	LPHN1	protein_coding	473.792	2.82795	0.227865	8.02207	1.03981e-15	1.9393e-14	DEG
ENSG00000115252.14	PDE1A	protein_coding	138.743	-5.00777	0.499823	-8.01838	1.07148e-15	1.9963e-14	DEG
ENSG00000171889.3	MIR31HG	sense_overlapping	319.896	-3.22851	0.278722	-7.99546	1.29093e-15	2.40271e-14	DEG
ENSG00000120952.4	PRAMEF2	protein_coding	113.124	6.88037	0.737095	7.97776	1.49013e-15	2.7706e-14	DEG
ENSG00000167550.6	RHEBL1	protein_coding	350.039	3.05739	0.257932	7.97646	1.50587e-15	2.79699e-14	DEG
ENSG00000107738.15	C10orf54	protein_coding	4115.45	-1.75445	0.0946339	-7.97235	1.55682e-15	2.88867e-14	DEG
ENSG00000198944.4	SOWAHA	protein_coding	133.965	5.34239	0.545251	7.96402	1.66542e-15	3.087e-14	DEG
ENSG00000140945.11	CDH13	protein_coding	4544.05	-1.98834	0.124443	-7.94208	1.9882e-15	3.68152e-14	DEG
ENSG00000078018.15	MAP2	protein_coding	618.828	-2.54271	0.194471	-7.93285	2.14173e-15	3.96176e-14	DEG
ENSG00000144285.11	SCN1A	protein_coding	152.295	-4.85726	0.486473	-7.92904	2.20852e-15	4.08115e-14	DEG
ENSG00000101425.8	BPI	protein_coding	86.4031	-5.65788	0.587731	-7.9252	2.27774e-15	4.20476e-14	DEG
ENSG00000080573.6	COL5A3	protein_coding	5646.16	-1.7755	0.0979019	-7.92122	2.35191e-15	4.33725e-14	DEG
ENSG00000183647.6	ZNF530	protein_coding	679.16	2.42102	0.179403	7.92084	2.35916e-15	4.34557e-14	DEG
ENSG00000196632.6	WNK3	protein_coding	620.504	3.03062	0.256368	7.92073	2.36123e-15	4.34557e-14	DEG
ENSG00000176826.11	FKBP9L	pseudogene	106.478	-5.53555	0.572677	-7.91992	2.37663e-15	4.36947e-14	DEG
ENSG00000180532.6	ZSCAN4	protein_coding	113.801	5.79928	0.606823	7.90886	2.59754e-15	4.77078e-14	DEG
ENSG00000154856.8	APCDD1	protein_coding	1684.93	-2.06103	0.134242	-7.90385	2.70419e-15	4.96161e-14	DEG
ENSG00000147874.6	HAUS6	protein_coding	5345.18	1.68663	0.0869834	7.89381	2.93103e-15	5.37237e-14	DEG
ENSG00000136514.2	RTP4	protein_coding	415.2	-2.88028	0.238322	-7.88968	3.0297e-15	5.54759e-14	DEG
ENSG00000163083.5	INHBB	protein_coding	136.699	4.96999	0.504303	7.87224	3.48338e-15	6.37187e-14	DEG
ENSG00000143416.16	SELENBP1	protein_coding	1130.59	-2.12531	0.143054	-7.86638	3.65061e-15	6.67103e-14	DEG
ENSG00000149418.6	ST14	protein_coding	115.411	5.7806	0.607903	7.86408	3.71827e-15	6.78781e-14	DEG
ENSG00000187240.9	DYNC2H1	protein_coding	2616.02	-2.03308	0.131382	-7.86313	3.74656e-15	6.83257e-14	DEG
ENSG00000147853.12	AK3	protein_coding	4840.19	-1.75883	0.096508	-7.86289	3.75361e-15	6.83852e-14	DEG
ENSG00000135218.13	CD36	protein_coding	169.988	-3.95482	0.375886	-7.86096	3.81215e-15	6.9382e-14	DEG
ENSG00000267194.1	RP1-193H18.2	lincRNA	122.134	-5.32521	0.550792	-7.85272	4.07126e-15	7.40233e-14	DEG
ENSG00000122378.9	FAM213A	protein_coding	895.248	2.25093	0.159327	7.85134	4.1161e-15	7.47635e-14	DEG
ENSG00000163935.9	SFMBT1	protein_coding	1485.95	2.184	0.150812	7.85083	4.13309e-15	7.49968e-14	DEG
ENSG00000196159.7	FAT4	protein_coding	3601.59	-2.00665	0.128305	-7.84572	4.30462e-15	7.8031e-14	DEG
ENSG00000162772.12	ATF3	protein_coding	386.103	2.9471	0.248181	7.84547	4.3135e-15	7.81136e-14	DEG
ENSG00000133069.10	TMCC2	protein_coding	898.823	2.31231	0.167436	7.83767	4.58989e-15	8.30357e-14	DEG
ENSG00000108001.9	EBF3	protein_coding	283.074	3.83002	0.3611	7.83723	4.60594e-15	8.32428e-14	DEG
ENSG00000249669.3	MIR143HG	lincRNA	198.872	-4.04335	0.388627	-7.83104	4.83867e-15	8.73616e-14	DEG
ENSG00000092964.12	DPYSL2	protein_coding	19617	-1.57694	0.0736917	-7.82907	4.91496e-15	8.86506e-14	DEG
ENSG00000104047.10	DTWD1	protein_coding	1778.58	-2.17702	0.150524	-7.81949	5.30393e-15	9.55712e-14	DEG
ENSG00000140105.13	WARS	protein_coding	7294.56	-1.80744	0.103278	-7.81815	5.36071e-15	9.64981e-14	DEG
ENSG00000101144.8	BMP7	protein_coding	118.785	6.37125	0.688541	7.80091	6.14612e-15	1.10526e-13	DEG
ENSG00000163683.7	SMIM14	protein_coding	4974.81	-1.83974	0.107656	-7.80027	6.17771e-15	1.10984e-13	DEG
ENSG00000187735.8	TCEA1	protein_coding	13163.4	-1.55788	0.0715547	-7.79658	6.36099e-15	1.14163e-13	DEG
ENSG00000175093.4	SPSB4	protein_coding	102.434	6.76934	0.740259	7.79368	6.50876e-15	1.167e-13	DEG
ENSG00000100345.16	MYH9	protein_coding	6013.15	-1.83186	0.106853	-7.78515	6.96307e-15	1.24722e-13	DEG
ENSG00000107518.12	ATRNL1	protein_coding	225.712	3.80358	0.360143	7.78462	6.9925e-15	1.25125e-13	DEG
ENSG00000063660.4	GPC1	protein_coding	23469.6	-1.58787	0.075675	-7.76834	7.95244e-15	1.42162e-13	DEG
ENSG00000106333.8	PCOLCE	protein_coding	2147.59	-2.02153	0.13163	-7.76059	8.45354e-15	1.5097e-13	DEG
ENSG00000204389.8	HSPA1A	protein_coding	1572.57	2.13467	0.146251	7.75837	8.60293e-15	1.53487e-13	DEG
ENSG00000157613.6	CREB3L1	protein_coding	866.502	-2.30962	0.168822	-7.75737	8.6708e-15	1.54545e-13	DEG
ENSG00000224189.2	HOXD-AS1	antisense	101.04	6.7472	0.741482	7.75095	9.1205e-15	1.62401e-13	DEG
ENSG00000113504.15	SLC12A7	protein_coding	551.909	2.54901	0.199955	7.7468	9.42351e-15	1.67631e-13	DEG
ENSG00000167130.13	DOLPP1	protein_coding	1297.49	2.07501	0.138859	7.74174	9.80632e-15	1.74269e-13	DEG
ENSG00000139567.8	ACVRL1	protein_coding	2432.71	-1.82375	0.106455	-7.73804	1.00964e-14	1.79248e-13	DEG
ENSG00000065308.4	TRAM2	protein_coding	4793.47	-1.68407	0.0884054	-7.73786	1.01101e-14	1.79315e-13	DEG
ENSG00000183018.4	SPNS2	protein_coding	123.069	5.27554	0.554396	7.71206	1.23805e-14	2.1937e-13	DEG
ENSG00000005073.5	HOXA11	protein_coding	680.612	-2.38737	0.180637	-7.68042	1.58574e-14	2.807e-13	DEG
ENSG00000259345.1	RP11-624L4.1	antisense	89.0602	-6.14425	0.67045	-7.67283	1.68245e-14	2.97529e-13	DEG
ENSG00000206557.5	TRIM71	protein_coding	98.2886	6.70017	0.744295	7.65849	1.88131e-14	3.3237e-13	DEG
ENSG00000114646.5	CSPG5	protein_coding	127.601	4.48589	0.455432	7.65403	1.94782e-14	3.43785e-13	DEG
ENSG00000128641.13	MYO1B	protein_coding	12798.1	-1.54946	0.0718304	-7.64939	2.01939e-14	3.5607e-13	DEG
ENSG00000100591.3	AHSA1	protein_coding	4894.36	1.69045	0.09036	7.64115	2.15286e-14	3.79235e-13	DEG
ENSG00000169231.9	THBS3	protein_coding	887.849	-2.20305	0.157781	-7.62482	2.44368e-14	4.30045e-13	DEG
ENSG00000092621.7	PHGDH	protein_coding	2960.35	-1.7967	0.104509	-7.62327	2.47337e-14	4.34846e-13	DEG
ENSG00000154319.10	FAM167A	protein_coding	1377.4	-2.11276	0.145977	-7.62289	2.48067e-14	4.35706e-13	DEG
ENSG00000140262.13	TCF12	protein_coding	5521.58	-1.68632	0.0900793	-7.61909	2.55478e-14	4.48289e-13	DEG
ENSG00000077942.13	FBLN1	protein_coding	13003.8	-1.71023	0.0933329	-7.60965	2.74845e-14	4.81804e-13	DEG
ENSG00000076258.5	FMO4	protein_coding	580.52	-2.52655	0.201106	-7.59077	3.18014e-14	5.5694e-13	DEG
ENSG00000223638.3	RFPL4A	protein_coding	94.7733	6.65898	0.745528	7.59056	3.18514e-14	5.57276e-13	DEG
ENSG00000168497.4	SDPR	protein_coding	125.042	-4.76714	0.496396	-7.58898	3.22442e-14	5.63603e-13	DEG
ENSG00000113361.8	CDH6	protein_coding	97.8541	-5.29559	0.566121	-7.58776	3.25491e-14	5.68384e-13	DEG
ENSG00000148835.9	TAF5	protein_coding	1228.15	2.10097	0.145141	7.5855	3.31203e-14	5.77801e-13	DEG
ENSG00000100644.12	HIF1A	protein_coding	28748.2	-1.52623	0.0695058	-7.57098	3.7041e-14	6.45578e-13	DEG
ENSG00000137561.4	TTPA	protein_coding	127.952	4.62886	0.479808	7.56315	3.93414e-14	6.8501e-13	DEG
ENSG00000137265.10	IRF4	protein_coding	97.3078	6.03423	0.665939	7.55959	4.04334e-14	7.03346e-13	DEG
ENSG00000130829.13	DUSP9	protein_coding	106.618	5.63536	0.613416	7.55664	4.13627e-14	7.18821e-13	DEG
ENSG00000131386.13	GALNT15	protein_coding	193.198	-3.71206	0.359191	-7.55046	4.33714e-14	7.53006e-13	DEG
ENSG00000111077.13	TENC1	protein_coding	1141.81	-2.36653	0.181133	-7.54432	4.5464e-14	7.88581e-13	DEG
ENSG00000024422.7	EHD2	protein_coding	3838.46	-1.80756	0.107258	-7.52917	5.10637e-14	8.84859e-13	DEG
ENSG00000010310.4	GIPR	protein_coding	77.7148	5.50356	0.598522	7.52447	5.29333e-14	9.1638e-13	DEG
ENSG00000069667.11	RORA	protein_coding	2414	1.86573	0.115191	7.51564	5.66337e-14	9.79503e-13	DEG
ENSG00000163453.7	IGFBP7	protein_coding	69566.5	-1.54828	0.0730216	-7.50846	5.98287e-14	1.03377e-12	DEG
ENSG00000117411.12	B4GALT2	protein_coding	4717.11	-1.82044	0.109389	-7.5002	6.37211e-14	1.09998e-12	DEG
ENSG00000162769.8	FLVCR1	protein_coding	1149.14	2.28091	0.170888	7.49562	6.5985e-14	1.13797e-12	DEG
ENSG00000175305.12	CCNE2	protein_coding	2107.54	1.98589	0.131585	7.49242	6.76137e-14	1.16495e-12	DEG
ENSG00000140284.6	SLC27A2	protein_coding	119.027	4.74569	0.500978	7.47675	7.61805e-14	1.3113e-12	DEG
ENSG00000069482.6	GAL	protein_coding	870.108	2.30744	0.175015	7.47045	7.99191e-14	1.37435e-12	DEG
ENSG00000129128.8	SPCS3	protein_coding	17214.5	1.57474	0.0769696	7.46711	8.19757e-14	1.40838e-12	DEG
ENSG00000077152.5	UBE2T	protein_coding	2898.66	1.77548	0.103931	7.46151	8.55373e-14	1.46817e-12	DEG
ENSG00000186897.3	C1QL4	protein_coding	93.7764	5.98144	0.668733	7.44908	9.39952e-14	1.61182e-12	DEG
ENSG00000162576.12	MXRA8	protein_coding	28742.8	-1.6259	0.0841854	-7.43473	1.04785e-13	1.79514e-12	DEG
ENSG00000184260.4	HIST2H2AC	protein_coding	4432.71	-1.77911	0.104872	-7.42914	1.09308e-13	1.87085e-12	DEG
ENSG00000145194.13	ECE2	protein_coding	885.306	2.21542	0.16376	7.42198	1.15384e-13	1.97299e-12	DEG
ENSG00000119686.5	FLVCR2	protein_coding	312.314	2.97611	0.266297	7.4207	1.16499e-13	1.99017e-12	DEG
ENSG00000135363.7	LMO2	protein_coding	212.387	3.97212	0.400895	7.41372	1.22806e-13	2.09592e-12	DEG
ENSG00000133116.6	KL	protein_coding	100.717	5.92276	0.664447	7.4088	1.27446e-13	2.17306e-12	DEG
ENSG00000106538.5	RARRES2	protein_coding	1149.86	-2.07903	0.145833	-7.3991	1.37116e-13	2.33574e-12	DEG
ENSG00000260578.1	CTD-2541J13.1	lincRNA	200.458	-3.75633	0.372791	-7.39376	1.42732e-13	2.42912e-12	DEG
ENSG00000166444.13	ST5	protein_coding	746.485	-2.62737	0.220213	-7.38999	1.46845e-13	2.49678e-12	DEG
ENSG00000159387.7	IRX6	protein_coding	107.081	5.18552	0.566793	7.38457	1.52945e-13	2.59806e-12	DEG
ENSG00000074211.9	PPP2R2C	protein_coding	91.4954	6.55983	0.753489	7.37877	1.59759e-13	2.71126e-12	DEG
ENSG00000054277.8	OPN3	protein_coding	1390.9	-1.97535	0.132318	-7.37128	1.68996e-13	2.86533e-12	DEG
ENSG00000124343.8	XG	protein_coding	224.438	-3.46037	0.334721	-7.35052	1.97436e-13	3.34439e-12	DEG
ENSG00000128578.5	STRIP2	protein_coding	820.999	2.25853	0.171228	7.35006	1.98113e-13	3.35272e-12	DEG
ENSG00000162630.5	B3GALT2	protein_coding	81.4098	-6.53328	0.753948	-7.33907	2.15078e-13	3.63642e-12	DEG
ENSG00000196923.9	PDLIM7	protein_coding	1818.32	-1.9354	0.127626	-7.3292	2.31532e-13	3.91096e-12	DEG
ENSG00000170390.10	DCLK2	protein_coding	1897.65	-1.9164	0.125143	-7.32277	2.42899e-13	4.09915e-12	DEG
ENSG00000035403.12	VCL	protein_coding	18198.7	-1.53935	0.0737676	-7.3115	2.64171e-13	4.45398e-12	DEG
ENSG00000235750.5	KIAA0040	protein_coding	625.537	2.56789	0.21453	7.30847	2.70196e-13	4.55132e-12	DEG
ENSG00000138135.5	CH25H	protein_coding	300.647	-3.10278	0.287751	-7.30765	2.71851e-13	4.57494e-12	DEG
ENSG00000119280.12	C1orf198	protein_coding	10182.9	-1.6078	0.0832559	-7.30042	2.86873e-13	4.82325e-12	DEG
ENSG00000223417.4	TRIM49D1	protein_coding	85.1061	6.50026	0.753607	7.29857	2.90842e-13	4.88544e-12	DEG
ENSG00000186522.10	SEPT10	protein_coding	8316.48	-1.64547	0.0884693	-7.29593	2.96603e-13	4.97759e-12	DEG
ENSG00000037280.11	FLT4	protein_coding	87.9818	6.50972	0.75547	7.29309	3.02916e-13	5.07883e-12	DEG
ENSG00000242114.1	MTFP1	protein_coding	776.146	2.24066	0.170325	7.28407	3.23904e-13	5.4257e-12	DEG
ENSG00000177791.11	MYOZ1	protein_coding	93.2112	-5.56685	0.627149	-7.28192	3.29113e-13	5.50785e-12	DEG
ENSG00000049192.10	ADAMTS6	protein_coding	2672.29	-1.76076	0.104583	-7.27423	3.48401e-13	5.82525e-12	DEG
ENSG00000142178.7	SIK1	protein_coding	393.004	2.87822	0.258281	7.27202	3.54164e-13	5.91615e-12	DEG
ENSG00000079102.12	RUNX1T1	protein_coding	790.604	-2.54189	0.212076	-7.27045	3.583e-13	5.97971e-12	DEG
ENSG00000184292.5	TACSTD2	protein_coding	140.521	4.20662	0.442119	7.25285	4.0809e-13	6.80438e-12	DEG
ENSG00000106031.6	HOXA13	protein_coding	1509.33	-1.97329	0.13441	-7.24122	4.4466e-13	7.40732e-12	DEG
ENSG00000147402.7	GABRQ	protein_coding	96.5881	5.70005	0.650785	7.22212	5.11832e-13	8.51846e-12	DEG
ENSG00000143126.7	CELSR2	protein_coding	397.596	2.70278	0.236007	7.21499	5.39383e-13	8.96874e-12	DEG
ENSG00000110002.11	VWA5A	protein_coding	377.16	-2.78661	0.247879	-7.20759	5.69519e-13	9.4554e-12	DEG
ENSG00000137571.6	SLCO5A1	protein_coding	133.299	4.27983	0.455055	7.20754	5.69697e-13	9.4554e-12	DEG
ENSG00000170961.6	HAS2	protein_coding	945.955	-2.13013	0.157258	-7.18643	6.65085e-13	1.10285e-11	DEG
ENSG00000198208.7	RPS6KL1	protein_coding	286.436	3.60128	0.362401	7.1779	7.07929e-13	1.17281e-11	DEG
ENSG00000133477.12	FAM83F	protein_coding	101.439	5.58266	0.638727	7.17468	7.24773e-13	1.19896e-11	DEG
ENSG00000213347.6	MXD3	protein_coding	1009.36	-2.296	0.180636	-7.17463	7.25033e-13	1.19896e-11	DEG
ENSG00000172031.6	EPHX4	protein_coding	490.248	2.52113	0.212721	7.15083	8.62574e-13	1.4251e-11	DEG
ENSG00000111058.3	ACSS3	protein_coding	647.46	-2.40992	0.197385	-7.14302	9.13017e-13	1.50706e-11	DEG
ENSG00000204485.2	XX-FW84067D5.1	pseudogene	79.9252	6.41235	0.757777	7.1424	9.17123e-13	1.51246e-11	DEG
ENSG00000138669.5	PRKG2	protein_coding	211.743	-3.46508	0.34564	-7.13194	9.8964e-13	1.63056e-11	DEG
ENSG00000165209.14	STRBP	protein_coding	1001.09	2.18988	0.166888	7.12979	1.00525e-12	1.65477e-11	DEG
ENSG00000154553.9	PDLIM3	protein_coding	85.5367	6.07714	0.71321	7.11871	1.08944e-12	1.79174e-11	DEG
ENSG00000198435.2	NRARP	protein_coding	98.449	5.05642	0.569981	7.11676	1.10497e-12	1.81563e-11	DEG
ENSG00000119888.6	EPCAM	protein_coding	137.722	4.58286	0.503675	7.11344	1.13187e-12	1.85814e-11	DEG
ENSG00000115541.6	HSPE1	protein_coding	2403.85	1.82707	0.116477	7.10077	1.24063e-12	2.03484e-11	DEG
ENSG00000076944.10	STXBP2	protein_coding	198.894	3.91863	0.411108	7.09942	1.25278e-12	2.05291e-11	DEG
ENSG00000116983.8	HPCAL4	protein_coding	78.6218	6.38704	0.759152	7.09613	1.28303e-12	2.10057e-11	DEG
ENSG00000182315.4	MBD3L3	protein_coding	78.5319	6.3852	0.759246	7.09284	1.31392e-12	2.14919e-11	DEG
ENSG00000160226.11	C21orf2	protein_coding	402.93	-2.60578	0.22667	-7.0842	1.39853e-12	2.28553e-11	DEG
ENSG00000169248.8	CXCL11	protein_coding	80.2179	6.38907	0.76075	7.0839	1.40157e-12	2.28842e-11	DEG
ENSG00000137831.10	UACA	protein_coding	7244.06	-2.95594	0.276177	-7.08221	1.41877e-12	2.31442e-11	DEG
ENSG00000076864.15	RAP1GAP	protein_coding	129.398	4.52272	0.497639	7.07886	1.45341e-12	2.3688e-11	DEG
ENSG00000086300.11	SNX10	protein_coding	93.0402	5.76065	0.673454	7.06901	1.56044e-12	2.54094e-11	DEG
ENSG00000111262.4	KCNA1	protein_coding	78.0891	6.3723	0.760151	7.06741	1.57858e-12	2.56817e-11	DEG
ENSG00000163584.13	RPL22L1	protein_coding	6369.21	-1.78223	0.110781	-7.06104	1.65258e-12	2.68615e-11	DEG
ENSG00000165929.8	TC2N	protein_coding	158.147	3.86615	0.406002	7.05947	1.67144e-12	2.71436e-11	DEG
ENSG00000170745.7	KCNS3	protein_coding	212.892	3.57181	0.36477	7.05049	1.78288e-12	2.89275e-11	DEG
ENSG00000197956.5	S100A6	protein_coding	38576.3	-1.55761	0.0790921	-7.05009	1.788e-12	2.89845e-11	DEG
ENSG00000133985.2	TTC9	protein_coding	355.129	2.77613	0.251976	7.04882	1.80447e-12	2.92253e-11	DEG
ENSG00000185070.6	FLRT2	protein_coding	3417.23	-1.73988	0.104969	-7.04861	1.8072e-12	2.92433e-11	DEG
ENSG00000136997.10	MYC	protein_coding	397.604	-2.66889	0.236817	-7.04718	1.82579e-12	2.95178e-11	DEG
ENSG00000137285.9	TUBB2B	protein_coding	2146.17	1.85979	0.122104	7.04149	1.90199e-12	3.07223e-11	DEG
ENSG00000155760.1	FZD7	protein_coding	7147.08	-1.5983	0.0850309	-7.0363	1.97412e-12	3.1859e-11	DEG
ENSG00000185008.13	ROBO2	protein_coding	909.741	-2.52231	0.21642	-7.03404	2.00634e-12	3.235e-11	DEG
ENSG00000108106.9	UBE2S	protein_coding	3925.22	1.64291	0.0914679	7.02879	2.08325e-12	3.35602e-11	DEG
ENSG00000168936.6	TMEM129	protein_coding	4394.44	-1.65184	0.0928262	-7.02218	2.18439e-12	3.51582e-11	DEG
ENSG00000084628.5	NKAIN1	protein_coding	101.421	5.09352	0.584123	7.00797	2.41809e-12	3.8885e-11	DEG
ENSG00000248235.2	AC037459.4	protein_coding	1247.97	-2.15157	0.164328	-7.00775	2.42178e-12	3.89099e-11	DEG
ENSG00000141738.9	GRB7	protein_coding	110.929	4.5365	0.504923	7.00404	2.48679e-12	3.99188e-11	DEG
ENSG00000104765.10	BNIP3L	protein_coding	9766.86	-1.58374	0.0833706	-7.00174	2.52809e-12	4.05459e-11	DEG
ENSG00000106078.13	COBL	protein_coding	75.6001	6.33087	0.761937	6.99647	2.62498e-12	4.20625e-11	DEG
ENSG00000144642.16	RBMS3	protein_coding	1892.39	-1.8628	0.123408	-6.99146	2.7204e-12	4.3553e-11	DEG
ENSG00000185015.3	CA13	protein_coding	401.569	2.61005	0.230348	6.98964	2.75602e-12	4.40841e-11	DEG
ENSG00000106689.6	LHX2	protein_coding	91.4498	5.94566	0.707757	6.9878	2.79234e-12	4.46256e-11	DEG
ENSG00000143751.9	SDE2	protein_coding	3453.08	1.67885	0.0972777	6.97852	2.98313e-12	4.76327e-11	DEG
ENSG00000108852.10	MPP2	protein_coding	454.118	2.61783	0.232071	6.97126	3.14125e-12	5.01132e-11	DEG
ENSG00000145911.5	N4BP3	protein_coding	353.139	2.84251	0.264678	6.96133	3.37078e-12	5.37275e-11	DEG
ENSG00000107957.12	SH3PXD2A	protein_coding	5339.36	-1.73153	0.105103	-6.96012	3.39988e-12	5.41197e-11	DEG
ENSG00000139116.13	KIF21A	protein_coding	799.879	2.51398	0.217525	6.96006	3.40137e-12	5.41197e-11	DEG
ENSG00000162458.8	FBLIM1	protein_coding	5055.1	-1.7092	0.101904	-6.95951	3.41463e-12	5.4283e-11	DEG
ENSG00000134574.7	DDB2	protein_coding	2217.16	-1.76627	0.110227	-6.95173	3.60837e-12	5.73125e-11	DEG
ENSG00000178035.7	IMPDH2	protein_coding	7293.5	-1.56172	0.0809092	-6.94264	3.84827e-12	6.10693e-11	DEG
ENSG00000184564.8	SLITRK6	protein_coding	75.6623	-6.01358	0.722621	-6.93805	3.97547e-12	6.30326e-11	DEG
ENSG00000152377.8	SPOCK1	protein_coding	7811.74	-2.00027	0.144203	-6.93652	4.01867e-12	6.36618e-11	DEG
ENSG00000228998.3	RP11-697E2.7	pseudogene	342.695	-2.82853	0.263659	-6.9352	4.05653e-12	6.42054e-11	DEG
ENSG00000232040.2	SCAND3	protein_coding	334.095	3.15033	0.31015	6.9332	4.11439e-12	6.50641e-11	DEG
ENSG00000034053.10	APBA2	protein_coding	2075.57	1.8146	0.117659	6.92341	4.40899e-12	6.96621e-11	DEG
UL91	UL91	CMV	76.1928	6.30201	0.76592	6.9224	4.44046e-12	7.00981e-11	DEG
ENSG00000247809.3	NR2F2-AS1	antisense	213.474	-4.24685	0.469095	-6.92153	4.46804e-12	7.04719e-11	DEG
ENSG00000071282.7	LMCD1	protein_coding	640.722	-2.30711	0.188994	-6.91614	4.64104e-12	7.31368e-11	DEG
ENSG00000160796.12	NBEAL2	protein_coding	609.653	2.42285	0.205877	6.91115	4.80753e-12	7.56946e-11	DEG
ENSG00000109625.14	CPZ	protein_coding	1073.91	-2.02081	0.14787	-6.90346	5.07514e-12	7.98386e-11	DEG
ENSG00000120949.10	TNFRSF8	protein_coding	73.54	6.27843	0.765363	6.89663	5.3249e-12	8.36948e-11	DEG
ENSG00000128714.5	HOXD13	protein_coding	164.916	3.71959	0.394444	6.89475	5.39599e-12	8.47385e-11	DEG
ENSG00000014138.4	POLA2	protein_coding	2008.16	1.92639	0.134382	6.8937	5.43594e-12	8.5292e-11	DEG
ENSG00000169247.7	SH3TC2	protein_coding	198.736	-3.33151	0.338327	-6.8913	5.52857e-12	8.66702e-11	DEG
ENSG00000137558.3	PI15	protein_coding	79.7727	-5.35915	0.633128	-6.8851	5.77488e-12	9.04532e-11	DEG
ENSG00000163235.11	TGFA	protein_coding	79.2827	5.70294	0.683353	6.88214	5.89592e-12	9.22691e-11	DEG
ENSG00000072163.14	LIMS2	protein_coding	619.175	-2.32186	0.192156	-6.87909	6.02354e-12	9.41848e-11	DEG
ENSG00000222041.6	LINC00152	lincRNA	2138.6	-1.92904	0.135243	-6.86941	6.44685e-12	1.00717e-10	DEG
ENSG00000109971.9	HSPA8	protein_coding	179131	1.60149	0.0876075	6.86574	6.61472e-12	1.0325e-10	DEG
ENSG00000105011.4	ASF1B	protein_coding	2898.1	1.81252	0.11839	6.86304	6.74094e-12	1.0513e-10	DEG
ENSG00000164088.13	PPM1M	protein_coding	1580	-1.87078	0.127141	-6.84896	7.43893e-12	1.15915e-10	DEG
ENSG00000184515.6	BEX5	protein_coding	72.959	6.25067	0.767799	6.83859	7.99764e-12	1.24514e-10	DEG
ENSG00000163162.4	RNF149	protein_coding	9296.16	1.53417	0.0781284	6.83704	8.08473e-12	1.25762e-10	DEG
ENSG00000136732.10	GYPC	protein_coding	3676.11	-1.98005	0.143349	-6.83683	8.09672e-12	1.2584e-10	DEG
ENSG00000205336.7	GPR56	protein_coding	129.392	4.00137	0.439538	6.82845	8.58352e-12	1.33291e-10	DEG
ENSG00000187123.10	LYPD6	protein_coding	723.653	2.24989	0.183098	6.82637	8.70891e-12	1.35122e-10	DEG
ENSG00000151914.13	DST	protein_coding	17228	-1.8238	0.120718	-6.82417	8.84322e-12	1.37089e-10	DEG
ENSG00000079308.12	TNS1	protein_coding	2027.79	-2.27029	0.186162	-6.8236	8.87867e-12	1.37521e-10	DEG
ENSG00000163637.7	PRICKLE2	protein_coding	2060.98	-2.00722	0.14764	-6.82215	8.96858e-12	1.38794e-10	DEG
ENSG00000104936.13	DMPK	protein_coding	877.086	-2.1516	0.168941	-6.8166	9.32206e-12	1.44141e-10	DEG
ENSG00000196932.7	TMEM26	protein_coding	255.25	-3.08082	0.30609	-6.79805	1.06045e-11	1.63831e-10	DEG
ENSG00000142798.12	HSPG2	protein_coding	4080.09	-1.84729	0.124677	-6.79587	1.07659e-11	1.66152e-10	DEG
ENSG00000261787.1	TCF24	protein_coding	71.5665	6.22523	0.768894	6.79578	1.07731e-11	1.66152e-10	DEG
ENSG00000244509.3	APOBEC3C	protein_coding	1259.06	-1.94588	0.139693	-6.77111	1.27801e-11	1.96938e-10	DEG
ENSG00000152192.6	POU4F1	protein_coding	70.5934	6.20845	0.769557	6.76811	1.30471e-11	2.00882e-10	DEG
ENSG00000130675.10	MNX1	protein_coding	75.979	5.64551	0.686448	6.76746	1.31062e-11	2.01619e-10	DEG
ENSG00000110324.5	IL10RA	protein_coding	69.4127	6.20203	0.768786	6.76655	1.31888e-11	2.02718e-10	DEG
ENSG00000117707.11	PROX1	protein_coding	166.224	3.59403	0.383419	6.76552	1.32829e-11	2.03991e-10	DEG
ENSG00000257951.1	RP11-554D14.4	pseudogene	71.8505	6.21174	0.770753	6.76187	1.36219e-11	2.09019e-10	DEG
ENSG00000134955.7	SLC37A2	protein_coding	491.347	2.48215	0.219478	6.75306	1.44762e-11	2.2194e-10	DEG
ENSG00000142910.11	TINAGL1	protein_coding	1731.12	-1.81721	0.12109	-6.74879	1.49088e-11	2.28378e-10	DEG
ENSG00000225581.3	TRIM53AP	pseudogene	68.6336	6.18815	0.769342	6.74362	1.54486e-11	2.36448e-10	DEG
ENSG00000084444.9	KIAA1467	protein_coding	817.967	2.17439	0.174155	6.74338	1.54745e-11	2.36643e-10	DEG
ENSG00000139793.14	MBNL2	protein_coding	5580.4	-1.57002	0.0846104	-6.73696	1.61737e-11	2.47127e-10	DEG
ENSG00000249992.1	TMEM158	protein_coding	1062.27	-2.06166	0.157735	-6.73063	1.68927e-11	2.57895e-10	DEG
ENSG00000166881.5	TMEM194A	protein_coding	7368.13	1.61958	0.0921299	6.72505	1.7553e-11	2.67751e-10	DEG
ENSG00000138399.13	FASTKD1	protein_coding	2618.24	1.7952	0.1183	6.72188	1.79398e-11	2.73419e-10	DEG
ENSG00000006282.15	SPATA20	protein_coding	2681.14	-1.83076	0.123758	-6.71277	1.90968e-11	2.90809e-10	DEG
ENSG00000235609.4	AF127936.7	lincRNA	433.845	-2.49176	0.222299	-6.7106	1.93831e-11	2.9492e-10	DEG
ENSG00000023330.10	ALAS1	protein_coding	3151.22	1.66227	0.0986942	6.71035	1.9416e-11	2.95172e-10	DEG
ENSG00000196968.6	FUT11	protein_coding	734.839	-2.17569	0.175235	-6.70924	1.95636e-11	2.97166e-10	DEG
ENSG00000151117.4	TMEM86A	protein_coding	459.012	2.4862	0.221584	6.70713	1.98488e-11	3.01245e-10	DEG
ENSG00000115109.9	EPB41L5	protein_coding	1841.07	1.95885	0.143099	6.7006	2.07567e-11	3.14761e-10	DEG
ENSG00000231672.2	DIRC3	protein_coding	151.355	-3.59584	0.387493	-6.69906	2.0976e-11	3.1782e-10	DEG
ENSG00000197296.5	FITM2	protein_coding	628.363	-2.23021	0.18367	-6.69793	2.11389e-11	3.2002e-10	DEG
ENSG00000169884.9	WNT10B	protein_coding	101.32	4.65029	0.54514	6.69606	2.1411e-11	3.23868e-10	DEG
ENSG00000183801.3	OLFML1	protein_coding	95.8751	-4.42482	0.512611	-6.68113	2.37111e-11	3.58361e-10	DEG
ENSG00000162614.14	NEXN	protein_coding	376.98	-2.59209	0.238374	-6.67899	2.40601e-11	3.63332e-10	DEG
ENSG00000188338.10	SLC38A3	processed_transcript	75.9981	5.12562	0.618287	6.67266	2.51202e-11	3.79024e-10	DEG
ENSG00000035664.7	DAPK2	protein_coding	383.303	-2.58953	0.238609	-6.66165	2.7077e-11	4.08208e-10	DEG
ENSG00000163884.3	KLF15	protein_coding	367.838	2.75339	0.263378	6.65731	2.78885e-11	4.20093e-10	DEG
ENSG00000165156.10	ZHX1	protein_coding	3565.66	-1.64877	0.0975998	-6.64721	2.98707e-11	4.49577e-10	DEG
ENSG00000076826.5	CAMSAP3	protein_coding	70.469	5.8196	0.725197	6.64591	3.01346e-11	4.53172e-10	DEG
ENSG00000088386.11	SLC15A1	protein_coding	66.4016	6.13388	0.772508	6.64573	3.01708e-11	4.53339e-10	DEG
ENSG00000113578.13	FGF1	protein_coding	195.832	-3.26659	0.341531	-6.63655	3.2112e-11	4.82107e-10	DEG
ENSG00000255571.2	LINC00925	lincRNA	68.6064	6.13971	0.774623	6.63512	3.24246e-11	4.86396e-10	DEG
ENSG00000242125.2	SNHG3	sense_intronic	2431.16	-2.11285	0.167747	-6.63412	3.26437e-11	4.89278e-10	DEG
ENSG00000170577.7	SIX2	protein_coding	225.81	3.37626	0.358699	6.62466	3.48057e-11	5.2125e-10	DEG
ENSG00000128567.12	PODXL	protein_coding	198.514	3.33893	0.353164	6.62278	3.52508e-11	5.2748e-10	DEG
ENSG00000128228.4	SDF2L1	protein_coding	406.604	2.58511	0.239349	6.62259	3.52968e-11	5.2773e-10	DEG
ENSG00000133112.12	TPT1	protein_coding	32281.6	-1.51888	0.0783765	-6.62034	3.58366e-11	5.35359e-10	DEG
ENSG00000145824.8	CXCL14	protein_coding	290.065	2.99624	0.301602	6.61878	3.62166e-11	5.4059e-10	DEG
ENSG00000112149.5	CD83	protein_coding	710.239	2.1917	0.18022	6.6125	3.77881e-11	5.63582e-10	DEG
ENSG00000260027.3	HOXB7	protein_coding	64.8842	6.10338	0.773872	6.59461	4.26381e-11	6.35393e-10	DEG
ENSG00000003249.9	DBNDD1	protein_coding	371.732	2.61463	0.244925	6.59237	4.3287e-11	6.44531e-10	DEG
ENSG00000160072.15	ATAD3B	protein_coding	2197.37	1.73039	0.110883	6.58706	4.48608e-11	6.67415e-10	DEG
ENSG00000198624.8	CCDC69	protein_coding	802.594	2.15344	0.175307	6.57954	4.7192e-11	7.0152e-10	DEG
ENSG00000182389.14	CACNB4	protein_coding	127.704	3.80532	0.426674	6.57484	4.87045e-11	7.2341e-10	DEG
ENSG00000128833.8	MYO5C	protein_coding	99.828	4.26654	0.497312	6.5684	5.08586e-11	7.54166e-10	DEG
ENSG00000172159.11	FRMD3	protein_coding	115.787	4.02549	0.46061	6.56845	5.08411e-11	7.54166e-10	DEG
ENSG00000080493.9	SLC4A4	protein_coding	313.261	2.6953	0.258475	6.55885	5.42229e-11	8.03397e-10	DEG
ENSG00000267022.1	ZNF223	protein_coding	63.6491	6.07583	0.775268	6.5472	5.86269e-11	8.67937e-10	DEG
ENSG00000116985.6	BMP8B	protein_coding	77.335	5.15884	0.635583	6.54335	6.01572e-11	8.89864e-10	DEG
ENSG00000169914.5	OTUD3	protein_coding	1248.28	2.21553	0.185816	6.54159	6.08698e-11	8.99669e-10	DEG
ENSG00000263424.1	CTD-2541J13.2	antisense	129.994	-3.74725	0.420169	-6.53843	6.21675e-11	9.181e-10	DEG
ENSG00000148826.6	NKX6-2	protein_coding	63.5608	6.07106	0.775689	6.53749	6.25598e-11	9.2314e-10	DEG
ENSG00000099953.5	MMP11	protein_coding	706.905	-2.13736	0.17413	-6.53169	6.50335e-11	9.5886e-10	DEG
ENSG00000184113.8	CLDN5	protein_coding	78.0215	5.35198	0.6664	6.53058	6.55157e-11	9.65182e-10	DEG
ENSG00000161395.8	PGAP3	protein_coding	408.932	-2.54843	0.237143	-6.52951	6.59873e-11	9.71339e-10	DEG
ENSG00000105664.6	COMP	protein_coding	165.314	-3.36063	0.361562	-6.52896	6.62285e-11	9.74097e-10	DEG
ENSG00000166963.8	MAP1A	protein_coding	3157.09	-1.84671	0.129735	-6.52642	6.73595e-11	9.89928e-10	DEG
ENSG00000113805.8	CNTN3	protein_coding	1127.35	-1.94512	0.14482	-6.52618	6.74701e-11	9.90747e-10	DEG
ENSG00000104320.9	NBN	protein_coding	5501.77	-1.67888	0.104049	-6.5246	6.81855e-11	1.00044e-09	DEG
ENSG00000113430.5	IRX4	protein_coding	69.0235	5.74301	0.726967	6.52438	6.82849e-11	1.00109e-09	DEG
ENSG00000085831.11	TTC39A	protein_coding	87.7444	5.29284	0.658209	6.522	6.9378e-11	1.01629e-09	DEG
ENSG00000144366.11	GULP1	protein_coding	3999.53	-1.6448	0.0989482	-6.5165	7.1968e-11	1.05338e-09	DEG
ENSG00000145362.12	ANK2	protein_coding	2188.47	-1.78025	0.119766	-6.51476	7.28073e-11	1.0648e-09	DEG
ENSG00000164970.10	FAM219A	protein_coding	1716.21	1.81306	0.124827	6.51349	7.3425e-11	1.07297e-09	DEG
ENSG00000149633.7	KIAA1755	protein_coding	148.864	-3.50165	0.384461	-6.50689	7.67232e-11	1.12026e-09	DEG
ENSG00000146826.10	C7orf43	protein_coding	860.912	2.05889	0.162739	6.50668	7.68278e-11	1.12088e-09	DEG
ENSG00000130294.10	KIF1A	protein_coding	88.1578	5.42023	0.679605	6.50412	7.81508e-11	1.13926e-09	DEG
ENSG00000042062.7	FAM65C	protein_coding	619.09	-2.49932	0.230545	-6.50339	7.85279e-11	1.14384e-09	DEG
ENSG00000079150.13	FKBP7	protein_coding	722.381	-2.15326	0.177484	-6.49781	8.14976e-11	1.18614e-09	DEG
ENSG00000205133.7	TRIQK	protein_coding	2165.13	-1.91843	0.141613	-6.48549	8.84438e-11	1.2862e-09	DEG
ENSG00000157873.13	TNFRSF14	protein_coding	1096.67	-1.99565	0.153526	-6.48521	8.86109e-11	1.2876e-09	DEG
ENSG00000142494.9	SLC47A1	protein_coding	146.161	3.81279	0.433737	6.48502	8.87225e-11	1.28819e-09	DEG
ENSG00000106809.6	OGN	protein_coding	60.607	-6.06009	0.780388	-6.48408	8.92771e-11	1.2952e-09	DEG
ENSG00000166126.6	AMN	protein_coding	125.708	3.86902	0.44271	6.48059	9.13637e-11	1.32441e-09	DEG
ENSG00000051382.4	PIK3CB	protein_coding	1420.4	2.06686	0.16482	6.47288	9.6155e-11	1.39275e-09	DEG
ENSG00000185347.13	C14orf80	protein_coding	822.724	2.04916	0.162303	6.4642	1.01839e-10	1.47389e-09	DEG
ENSG00000177054.9	ZDHHC13	protein_coding	3886.5	1.6724	0.104118	6.45804	1.0607e-10	1.53391e-09	DEG
ENSG00000151726.9	ACSL1	protein_coding	2011.98	1.86216	0.133527	6.45687	1.0689e-10	1.54453e-09	DEG
ENSG00000120254.11	MTHFD1L	protein_coding	2093.74	-1.74748	0.115794	-6.45528	1.08018e-10	1.55958e-09	DEG
ENSG00000177679.14	SRRM3	protein_coding	360.507	2.65847	0.256955	6.45432	1.08703e-10	1.56821e-09	DEG
ENSG00000205403.8	CFI	protein_coding	374.773	-2.64773	0.255818	-6.44102	1.18672e-10	1.71068e-09	DEG
ENSG00000230522.3	MBD3L2	protein_coding	61.3287	6.01561	0.778741	6.44067	1.18949e-10	1.7133e-09	DEG
ENSG00000174136.7	RGMB	protein_coding	6301.1	-1.53171	0.0826139	-6.43603	1.22635e-10	1.76499e-09	DEG
ENSG00000176658.12	MYO1D	protein_coding	10776.1	-1.53562	0.0832503	-6.43386	1.244e-10	1.78896e-09	DEG
ENSG00000175928.5	LRRN1	protein_coding	62.521	5.7327	0.737176	6.42005	1.36232e-10	1.95756e-09	DEG
ENSG00000117480.11	FAAH	protein_coding	174.122	3.93024	0.456858	6.41389	1.41849e-10	2.03504e-09	DEG
ENSG00000169252.4	ADRB2	protein_coding	207.683	3.10069	0.327519	6.41394	1.41809e-10	2.03504e-09	DEG
ENSG00000092758.11	COL9A3	protein_coding	121.108	4.18551	0.497092	6.40829	1.47164e-10	2.10962e-09	DEG
ENSG00000135842.12	FAM129A	protein_coding	5260.92	-1.54587	0.0852248	-6.40503	1.50344e-10	2.15351e-09	DEG
ENSG00000108559.7	NUP88	protein_coding	4576.45	1.88922	0.139084	6.39338	1.62253e-10	2.32225e-09	DEG
ENSG00000167703.10	SLC43A2	protein_coding	1057.69	1.99811	0.15652	6.3769	1.80707e-10	2.58432e-09	DEG
ENSG00000226380.3	MIR29B1	lincRNA	400.134	-3.38459	0.373987	-6.37613	1.81622e-10	2.59535e-09	DEG
ENSG00000204131.6	NHSL2	protein_coding	270.674	-2.76527	0.277366	-6.3644	1.96049e-10	2.79931e-09	DEG
ENSG00000149256.10	TENM4	protein_coding	436.373	-2.78542	0.280906	-6.35592	2.07182e-10	2.95594e-09	DEG
ENSG00000160447.6	PKN3	protein_coding	929.516	2.03405	0.162736	6.35416	2.09562e-10	2.98754e-09	DEG
ENSG00000176485.6	PLA2G16	protein_coding	701.15	2.2478	0.196507	6.3499	2.15452e-10	3.06909e-09	DEG
ENSG00000235863.2	B3GALT4	protein_coding	166.876	-3.38335	0.375687	-6.34398	2.23903e-10	3.18697e-09	DEG
ENSG00000116667.8	C1orf21	protein_coding	1332.77	-1.85517	0.134851	-6.34157	2.27432e-10	3.23465e-09	DEG
ENSG00000204513.5	PRAMEF11	protein_coding	58.9204	5.95741	0.781748	6.34144	2.27623e-10	3.23482e-09	DEG
ENSG00000162878.8	PKDCC	protein_coding	692.204	2.49786	0.236351	6.33745	2.33592e-10	3.31705e-09	DEG
ENSG00000158560.10	DYNC1I1	protein_coding	58.744	5.49646	0.709641	6.33624	2.3544e-10	3.34067e-09	DEG
ENSG00000007372.16	PAX6	protein_coding	58.0773	5.3023	0.679023	6.33602	2.35774e-10	3.34279e-09	DEG
ENSG00000137273.3	FOXF2	protein_coding	1206.86	-1.88407	0.139537	-6.33573	2.36218e-10	3.34619e-09	DEG
ENSG00000150244.8	TRIM48	protein_coding	60.2649	5.96199	0.783189	6.33562	2.36385e-10	3.34619e-09	DEG
ENSG00000116721.9	PRAMEF1	protein_coding	58.7127	5.9495	0.782317	6.32671	2.50436e-10	3.54233e-09	DEG
ENSG00000168143.8	FAM83B	protein_coding	58.4327	5.9455	0.782354	6.32131	2.59352e-10	3.66558e-09	DEG
ENSG00000188732.6	FAM221A	protein_coding	142.4	4.05143	0.483089	6.31651	2.67537e-10	3.77831e-09	DEG
ENSG00000257913.1	RP11-386G11.5	antisense	157.183	3.96128	0.469098	6.31271	2.74183e-10	3.86914e-09	DEG
ENSG00000161267.7	BDH1	protein_coding	333.386	3.01592	0.319516	6.30929	2.8031e-10	3.95252e-09	DEG
ENSG00000168386.14	FILIP1L	protein_coding	411.555	-2.57295	0.249348	-6.30827	2.82179e-10	3.97578e-09	DEG
ENSG00000168405.10	CMAHP	pseudogene	293.046	-2.7952	0.284695	-6.30571	2.86882e-10	4.0389e-09	DEG
ENSG00000152518.5	ZFP36L2	protein_coding	2088.05	-1.74997	0.11903	-6.30069	2.9632e-10	4.16853e-09	DEG
ENSG00000153898.8	MCOLN2	protein_coding	114.189	4.05687	0.485575	6.29536	3.06691e-10	4.31107e-09	DEG
ENSG00000248927.1	CTD-2334D19.1	lincRNA	81.1926	-4.59564	0.571907	-6.28711	3.23425e-10	4.54276e-09	DEG
ENSG00000156535.9	CD109	protein_coding	17865.6	-1.47294	0.0753278	-6.27842	3.42033e-10	4.8004e-09	DEG
ENSG00000117533.10	VAMP4	protein_coding	1885.77	-1.763	0.121543	-6.27764	3.43761e-10	4.82092e-09	DEG
ENSG00000170608.2	FOXA3	protein_coding	57.3765	5.91923	0.78371	6.27685	3.45507e-10	4.84165e-09	DEG
ENSG00000182718.12	ANXA2	protein_coding	152427	-1.41831	0.0666712	-6.27428	3.5126e-10	4.91846e-09	DEG
ENSG00000152455.11	SUV39H2	protein_coding	2005.08	1.7778	0.124086	6.26817	3.6532e-10	5.11138e-09	DEG
ENSG00000062282.10	DGAT2	protein_coding	634.202	2.46116	0.233289	6.26328	3.76964e-10	5.27022e-09	DEG
ENSG00000071967.7	CYBRD1	protein_coding	26845.9	-1.44394	0.0709146	-6.26027	3.84321e-10	5.36892e-09	DEG
ENSG00000138755.5	CXCL9	protein_coding	57.3157	5.90859	0.784777	6.25476	3.9814e-10	5.55768e-09	DEG
ENSG00000261452.1	RP11-509E16.1	lincRNA	64.7753	5.38957	0.702874	6.24517	4.23336e-10	5.90483e-09	DEG
ENSG00000173890.12	GPR160	protein_coding	138.565	3.88607	0.462199	6.24423	4.25894e-10	5.93594e-09	DEG
ENSG00000173406.11	DAB1	protein_coding	154.329	-3.4219	0.388233	-6.23827	4.42444e-10	6.15737e-09	DEG
ENSG00000235034.2	C19orf81	protein_coding	106.864	3.84227	0.455618	6.23826	4.42462e-10	6.15737e-09	DEG
ENSG00000165490.8	C11orf82	protein_coding	1858.91	1.72835	0.116833	6.23412	4.54312e-10	6.31741e-09	DEG
ENSG00000078114.14	NEBL	protein_coding	246.712	3.78	0.446646	6.22418	4.8409e-10	6.72632e-09	DEG
ENSG00000253864.1	AC131025.8	lincRNA	65.0677	-5.05365	0.651915	-6.21806	5.03333e-10	6.98834e-09	DEG
ENSG00000006459.6	JHDM1D	protein_coding	922.277	2.44476	0.232607	6.21116	5.25936e-10	7.29655e-09	DEG
ENSG00000176208.4	ATAD5	protein_coding	886.119	1.97156	0.156464	6.20949	5.31574e-10	7.36912e-09	DEG
ENSG00000206432.4	TMEM200C	protein_coding	55.7875	5.87545	0.786142	6.20174	5.58424e-10	7.73541e-09	DEG
ENSG00000119383.15	PPP2R4	protein_coding	14134.5	-1.45081	0.0727442	-6.19715	5.74932e-10	7.958e-09	DEG
ENSG00000124529.3	HIST1H4B	protein_coding	3944.92	-1.80731	0.130321	-6.19481	5.83538e-10	8.07093e-09	DEG
ENSG00000137975.7	CLCA2	protein_coding	91.6102	-4.42837	0.553502	-6.19396	5.867e-10	8.10847e-09	DEG
ENSG00000117266.11	CDK18	protein_coding	67.3226	5.19173	0.677276	6.18911	6.05053e-10	8.35574e-09	DEG
ENSG00000105255.6	FSD1	protein_coding	1202.3	1.89432	0.144579	6.18567	6.18403e-10	8.53358e-09	DEG
ENSG00000223953.3	C1QTNF5	protein_coding	806.292	-2.03692	0.167689	-6.18362	6.26473e-10	8.63836e-09	DEG
ENSG00000105750.10	ZNF85	protein_coding	680.385	2.54999	0.250684	6.18304	6.28782e-10	8.66359e-09	DEG
ENSG00000172985.8	SH3RF3	protein_coding	583.237	-2.21655	0.196819	-6.18107	6.36699e-10	8.766e-09	DEG
ENSG00000115091.7	ACTR3	protein_coding	9871.16	-1.48478	0.0784943	-6.17603	6.57322e-10	9.04305e-09	DEG
ENSG00000197093.6	GAL3ST4	protein_coding	178.245	-3.10455	0.340772	-6.17584	6.58109e-10	9.04701e-09	DEG
ENSG00000184900.11	SUMO3	protein_coding	4078.2	-1.69384	0.112379	-6.17409	6.6544e-10	9.14083e-09	DEG
ENSG00000140465.9	CYP1A1	protein_coding	55.4377	5.8585	0.787465	6.16979	6.83787e-10	9.38573e-09	DEG
ENSG00000119669.3	IRF2BPL	protein_coding	2091.85	-1.73823	0.119775	-6.1635	7.11537e-10	9.75923e-09	DEG
ENSG00000136040.4	PLXNC1	protein_coding	1164.65	-2.02588	0.16682	-6.14966	7.76497e-10	1.06421e-08	DEG
ENSG00000020633.14	RUNX3	protein_coding	180.622	3.16001	0.351529	6.14462	8.01539e-10	1.0977e-08	DEG
ENSG00000125520.9	SLC2A4RG	protein_coding	1173.54	-1.86872	0.141465	-6.1409	8.20552e-10	1.12289e-08	DEG
ENSG00000177706.8	FAM20C	protein_coding	3913.33	-1.62746	0.102212	-6.1388	8.3146e-10	1.13696e-08	DEG
ENSG00000170035.11	UBE2E3	protein_coding	2851.48	-1.63754	0.103941	-6.13365	8.58827e-10	1.17349e-08	DEG
ENSG00000166548.11	TK2	protein_coding	3946.15	-1.59859	0.0976105	-6.13243	8.65464e-10	1.18167e-08	DEG
ENSG00000132773.7	TOE1	protein_coding	1319.29	1.82368	0.134523	6.12298	9.18417e-10	1.25302e-08	DEG
ENSG00000181938.9	GINS3	protein_coding	1349.76	1.82808	0.135568	6.10824	1.00738e-09	1.37337e-08	DEG
ENSG00000177614.5	PGBD5	protein_coding	110.024	3.90261	0.475228	6.10784	1.0099e-09	1.37576e-08	DEG
ENSG00000169245.4	CXCL10	protein_coding	57.1296	5.53301	0.742316	6.10658	1.01786e-09	1.38556e-08	DEG
ENSG00000063438.12	AHRR	protein_coding	2257	-1.83394	0.13662	-6.10413	1.03365e-09	1.40599e-08	DEG
ENSG00000163710.3	PCOLCE2	protein_coding	100.175	3.91746	0.478748	6.09395	1.10158e-09	1.49727e-08	DEG
ENSG00000269893.2	SNHG8	lincRNA	1953.05	-1.74251	0.12192	-6.09016	1.12801e-09	1.53204e-08	DEG
ENSG00000139318.7	DUSP6	protein_coding	1521.9	-1.99647	0.163648	-6.0891	1.13544e-09	1.54098e-08	DEG
ENSG00000176697.14	BDNF	protein_coding	1531.43	-1.78797	0.129666	-6.07689	1.22535e-09	1.66176e-08	DEG
ENSG00000177409.7	SAMD9L	protein_coding	2383.04	-1.7452	0.122638	-6.07644	1.22883e-09	1.66523e-08	DEG
ENSG00000125731.8	SH2D3A	protein_coding	61.7005	5.30482	0.708519	6.0758	1.23369e-09	1.67056e-08	DEG
ENSG00000128791.7	TWSG1	protein_coding	5028.78	-1.56733	0.0936447	-6.05829	1.37578e-09	1.86158e-08	DEG
ENSG00000164418.15	GRIK2	protein_coding	706.129	-2.25755	0.207785	-6.05219	1.42894e-09	1.93206e-08	DEG
ENSG00000085491.11	SLC25A24	protein_coding	6594.06	-1.49011	0.0810665	-6.04579	1.48682e-09	2.00882e-08	DEG
ENSG00000100385.9	IL2RB	protein_coding	81.1184	4.39669	0.562386	6.03979	1.54314e-09	2.0818e-08	DEG
ENSG00000139874.5	SSTR1	protein_coding	291.419	-2.76411	0.29208	-6.03981	1.54296e-09	2.0818e-08	DEG
ENSG00000143196.4	DPT	protein_coding	729.175	-2.12127	0.185658	-6.03942	1.54669e-09	2.08504e-08	DEG
ENSG00000168505.6	GBX2	protein_coding	72.852	5.19563	0.695801	6.02994	1.64025e-09	2.20951e-08	DEG
ENSG00000153246.7	PLA2R1	protein_coding	1787.91	-1.77178	0.127998	-6.02967	1.64296e-09	2.21151e-08	DEG
ENSG00000166501.8	PRKCB	protein_coding	73.2649	5.01645	0.666437	6.02675	1.67286e-09	2.25009e-08	DEG
ENSG00000109452.8	INPP4B	protein_coding	8193.2	-1.56171	0.0932045	-6.0266	1.67448e-09	2.25059e-08	DEG
ENSG00000182742.5	HOXB4	protein_coding	51.9511	5.76756	0.792013	6.01954	1.74913e-09	2.34918e-08	DEG
ENSG00000175264.3	CHST1	protein_coding	97.8621	3.98405	0.49607	6.01538	1.79463e-09	2.4085e-08	DEG
ENSG00000107798.13	LIPA	protein_coding	5534.17	-1.55193	0.0917565	-6.01521	1.79654e-09	2.40928e-08	DEG
ENSG00000168306.8	ACOX2	protein_coding	173.482	-3.32655	0.387091	-6.01035	1.85129e-09	2.48086e-08	DEG
ENSG00000172201.6	ID4	protein_coding	279.959	2.73896	0.289706	6.00248	1.94327e-09	2.60219e-08	DEG
US34A	US34A	CMV	52.5998	5.75694	0.794176	5.98978	2.10126e-09	2.81168e-08	DEG
ENSG00000111424.6	VDR	protein_coding	584.772	-2.13997	0.190361	-5.98844	2.11865e-09	2.83286e-08	DEG
ENSG00000134775.11	FHOD3	protein_coding	1051.2	-1.9702	0.162087	-5.98567	2.15502e-09	2.87935e-08	DEG
ENSG00000014914.15	MTMR11	protein_coding	959.443	-1.98835	0.165231	-5.9816	2.20951e-09	2.94998e-08	DEG
ENSG00000249156.1	RP11-432M8.9	pseudogene	51.2449	5.74477	0.793365	5.98057	2.22359e-09	2.96659e-08	DEG
ENSG00000144010.7	TRIM43B	pseudogene	51.2834	5.74364	0.793545	5.97778	2.26199e-09	3.01559e-08	DEG
ENSG00000099889.9	ARVCF	protein_coding	534.823	2.20244	0.20121	5.97606	2.28593e-09	3.04526e-08	DEG
ENSG00000139985.5	ADAM21	protein_coding	215.47	2.91561	0.32058	5.97545	2.2946e-09	3.05457e-08	DEG
ENSG00000184254.12	ALDH1A3	protein_coding	715.925	2.56271	0.261751	5.97021	2.36948e-09	3.15193e-08	DEG
ENSG00000124693.2	HIST1H3B	protein_coding	6038.21	-1.6744	0.112981	-5.96915	2.38497e-09	3.17021e-08	DEG
ENSG00000128849.9	CGNL1	protein_coding	71.284	4.69336	0.618797	5.96861	2.39279e-09	3.17827e-08	DEG
ENSG00000160190.9	SLC37A1	protein_coding	316.62	3.14402	0.359284	5.96747	2.40956e-09	3.19819e-08	DEG
ENSG00000164070.7	HSPA4L	protein_coding	3272.53	1.62793	0.105249	5.96615	2.42921e-09	3.22191e-08	DEG
ENSG00000171476.17	HOPX	protein_coding	51.4024	5.73781	0.794349	5.9644	2.4554e-09	3.25427e-08	DEG
ENSG00000073331.13	ALPK1	protein_coding	549.716	-2.36359	0.228629	-5.9642	2.45836e-09	3.25579e-08	DEG
ENSG00000100316.11	RPL3	protein_coding	136453	-1.36903	0.0618983	-5.96181	2.49459e-09	3.30137e-08	DEG
ENSG00000182223.7	ZAR1	protein_coding	67.0634	4.96539	0.665599	5.95762	2.55932e-09	3.38455e-08	DEG
ENSG00000141750.6	STAC2	protein_coding	50.685	5.7303	0.794044	5.95722	2.56563e-09	3.39041e-08	DEG
ENSG00000175602.2	CCDC85B	protein_coding	2603.41	-1.67997	0.114187	-5.95486	2.60292e-09	3.43719e-08	DEG
ENSG00000161036.6	LRWD1	protein_coding	2562.77	1.6332	0.106459	5.94783	2.71724e-09	3.58548e-08	DEG
ENSG00000183837.8	PNMA3	protein_coding	107.305	3.77033	0.465781	5.94771	2.71918e-09	3.58548e-08	DEG
ENSG00000130649.5	CYP2E1	protein_coding	294.906	2.98958	0.334836	5.94197	2.81613e-09	3.7106e-08	DEG
ENSG00000064692.14	SNCAIP	protein_coding	297.054	-2.78094	0.299918	-5.93809	2.8836e-09	3.79674e-08	DEG
ENSG00000172260.9	NEGR1	protein_coding	776.342	-2.11909	0.188486	-5.93727	2.89813e-09	3.81309e-08	DEG
ENSG00000185960.8	SHOX	protein_coding	1078.8	-1.86818	0.1463	-5.93423	2.9522e-09	3.88142e-08	DEG
ENSG00000132386.6	SERPINF1	protein_coding	639.513	-2.27033	0.21415	-5.93196	2.99339e-09	3.93271e-08	DEG
ENSG00000173559.8	NABP1	protein_coding	3765.62	-1.54779	0.0923541	-5.93137	3.00409e-09	3.9439e-08	DEG
ENSG00000259450.1	RP11-265N7.1	lincRNA	73.1782	-4.79396	0.639838	-5.92956	3.03753e-09	3.98491e-08	DEG
ENSG00000181381.9	DDX60L	protein_coding	1424.37	-1.96839	0.163324	-5.9293	3.04235e-09	3.98835e-08	DEG
ENSG00000188783.5	PRELP	protein_coding	137.38	-3.34959	0.396337	-5.92827	3.06148e-09	4.01052e-08	DEG
ENSG00000064300.4	NGFR	protein_coding	63.2756	4.90675	0.659053	5.92783	3.06973e-09	4.01683e-08	DEG
ENSG00000089225.15	TBX5	protein_coding	954.037	-2.10824	0.186957	-5.92777	3.07074e-09	4.01683e-08	DEG
ENSG00000076716.7	GPC4	protein_coding	167.019	3.3817	0.401992	5.92475	3.12765e-09	4.08831e-08	DEG
ENSG00000221926.7	TRIM16	protein_coding	3175.51	-1.66217	0.111807	-5.92238	3.17317e-09	4.14482e-08	DEG
ENSG00000198879.7	SFMBT2	protein_coding	181.833	3.26455	0.38241	5.92179	3.18459e-09	4.15674e-08	DEG
ENSG00000108448.16	TRIM16L	protein_coding	288.208	-2.59209	0.269316	-5.91163	3.38738e-09	4.41825e-08	DEG
ENSG00000083857.9	FAT1	protein_coding	47475	-1.54342	0.0919272	-5.91136	3.39288e-09	4.42223e-08	DEG
ENSG00000173320.5	STOX2	protein_coding	54.9391	5.46195	0.755151	5.90869	3.44833e-09	4.49127e-08	DEG
ENSG00000006047.8	YBX2	protein_coding	50.9628	5.70689	0.796908	5.90644	3.49577e-09	4.54979e-08	DEG
ENSG00000108984.9	MAP2K6	protein_coding	81.3312	-4.30474	0.559562	-5.90594	3.50644e-09	4.56039e-08	DEG
ENSG00000159231.5	CBR3	protein_coding	1197.91	-1.83784	0.142062	-5.89772	3.68564e-09	4.79e-08	DEG
ENSG00000112394.12	SLC16A10	protein_coding	52.055	5.70756	0.798607	5.89472	3.75327e-09	4.87091e-08	DEG
ENSG00000136531.9	SCN2A	protein_coding	93.9392	-4.52488	0.597971	-5.89473	3.75284e-09	4.87091e-08	DEG
ENSG00000135063.13	FAM189A2	protein_coding	50.8615	5.70079	0.797497	5.89442	3.75989e-09	4.87599e-08	DEG
ENSG00000205089.3	CCNI2	protein_coding	50.2986	5.69641	0.796999	5.89262	3.8012e-09	4.92603e-08	DEG
ENSG00000182866.12	LCK	protein_coding	56.3247	5.05294	0.687823	5.89242	3.80576e-09	4.92842e-08	DEG
ENSG00000127863.11	TNFRSF19	protein_coding	1115.13	-1.85265	0.144743	-5.89082	3.84295e-09	4.97302e-08	DEG
ENSG00000157601.9	MX1	protein_coding	1460.96	2.06483	0.180851	5.8879	3.91137e-09	5.05794e-08	DEG
ENSG00000147894.10	C9orf72	protein_coding	935.189	1.91317	0.155143	5.88595	3.95773e-09	5.11423e-08	DEG
ENSG00000087250.4	MT3	protein_coding	49.2742	5.68724	0.796406	5.88548	3.96889e-09	5.125e-08	DEG
ENSG00000197958.8	RPL12	protein_coding	39927.6	-1.47757	0.0811834	-5.88267	4.03711e-09	5.20937e-08	DEG
ENSG00000260977.1	RP11-333I13.1	lincRNA	61.7448	-4.77489	0.641802	-5.88171	4.06058e-09	5.23592e-08	DEG
ENSG00000125841.8	NRSN2	protein_coding	1915.72	-1.67681	0.115241	-5.87296	4.28078e-09	5.51593e-08	DEG
ENSG00000258064.1	RP11-293I14.2	protein_coding	49.107	5.67804	0.797115	5.86872	4.39185e-09	5.65501e-08	DEG
ENSG00000125868.11	DSTN	protein_coding	5242.22	-1.57032	0.0973677	-5.85736	4.70281e-09	6.05111e-08	DEG
ENSG00000000971.11	CFH	protein_coding	4354.33	-1.51966	0.0887775	-5.85356	4.81154e-09	6.18661e-08	DEG
ENSG00000134602.11	MST4	protein_coding	1137.7	1.91519	0.156475	5.84877	4.95235e-09	6.36314e-08	DEG
ENSG00000099282.5	TSPAN15	protein_coding	99.6549	3.7771	0.47484	5.84851	4.95995e-09	6.36838e-08	DEG
ENSG00000198945.3	L3MBTL3	protein_coding	1202.43	1.82119	0.14044	5.84727	4.99719e-09	6.41164e-08	DEG
ENSG00000047249.12	ATP6V1H	protein_coding	1318.06	1.77973	0.133401	5.84502	5.06519e-09	6.49429e-08	DEG
ENSG00000105610.4	KLF1	protein_coding	49.1219	5.66603	0.798448	5.84387	5.10013e-09	6.53445e-08	DEG
ENSG00000158079.10	PTPDC1	protein_coding	671.067	2.17103	0.20054	5.83939	5.23908e-09	6.70773e-08	DEG
ENSG00000148459.11	PDSS1	protein_coding	791.306	1.98771	0.169358	5.83208	5.47417e-09	7.00376e-08	DEG
ENSG00000188559.9	RALGAPA2	protein_coding	740.768	2.29986	0.222891	5.83183	5.48241e-09	7.00935e-08	DEG
ENSG00000064205.6	WISP2	protein_coding	87.7812	-3.99197	0.513057	-5.83166	5.48794e-09	7.01146e-08	DEG
ENSG00000237330.2	RNF223	protein_coding	48.9751	5.65818	0.799015	5.8299	5.5459e-09	7.08051e-08	DEG
ENSG00000073008.10	PVR	protein_coding	9036.58	1.47499	0.0814847	5.82918	5.57004e-09	7.10632e-08	DEG
ENSG00000095203.10	EPB41L4B	protein_coding	386.997	2.3872	0.238125	5.82554	5.69275e-09	7.25775e-08	DEG
ENSG00000177469.12	PTRF	protein_coding	6428.63	-1.74155	0.127297	-5.82539	5.69809e-09	7.25944e-08	DEG
ENSG00000241360.1	PDXP	protein_coding	2390.61	1.74904	0.128643	5.82259	5.79422e-09	7.37673e-08	DEG
ENSG00000246350.1	RP5-1186N24.3	processed_transcript	196.304	2.91686	0.329221	5.8224	5.8007e-09	7.37978e-08	DEG
ENSG00000115718.13	PROC	protein_coding	48.0427	5.64755	0.798647	5.81927	5.91037e-09	7.51402e-08	DEG
ENSG00000165905.12	GYLTL1B	protein_coding	48.0176	5.64696	0.798689	5.81824	5.94705e-09	7.55535e-08	DEG
ENSG00000184232.4	OAF	protein_coding	3454.55	-1.69136	0.118892	-5.81504	6.062e-09	7.69597e-08	DEG
ENSG00000185272.9	RBM11	protein_coding	47.8428	5.64085	0.79903	5.8081	6.31839e-09	8.01585e-08	DEG
ENSG00000104313.13	EYA1	protein_coding	286.521	-2.58963	0.274158	-5.79823	6.70192e-09	8.49645e-08	DEG
ENSG00000168389.13	MFSD2A	protein_coding	865.505	4.0636	0.528684	5.79476	6.84172e-09	8.66762e-08	DEG
ENSG00000269289.1	CTB-92J24.3	antisense	86.2337	-4.17218	0.547615	-5.79272	6.92547e-09	8.76758e-08	DEG
ENSG00000179314.9	WSCD1	protein_coding	174.757	4.16701	0.546871	5.79115	6.99082e-09	8.84412e-08	DEG
ENSG00000104892.12	KLC3	protein_coding	59.9953	5.01192	0.693486	5.78515	7.24465e-09	9.15884e-08	DEG
ENSG00000204481.6	PRAMEF14	protein_coding	49.3815	5.63647	0.801942	5.78156	7.40128e-09	9.35032e-08	DEG
ENSG00000166825.9	ANPEP	protein_coding	9011.35	-1.50937	0.0881722	-5.77704	7.60284e-09	9.59825e-08	DEG
ENSG00000168496.3	FEN1	protein_coding	2416.99	1.67482	0.116941	5.77061	7.8985e-09	9.96456e-08	DEG
ENSG00000180667.6	YOD1	protein_coding	2714.24	1.65634	0.113747	5.77019	7.91831e-09	9.98258e-08	DEG
ENSG00000136275.6	C7orf69	protein_coding	48.8729	-5.36162	0.756247	-5.76746	8.04749e-09	1.01351e-07	DEG
ENSG00000174099.6	MSRB3	protein_coding	11639.1	-1.6342	0.109963	-5.7674	8.05046e-09	1.01351e-07	DEG
ENSG00000159217.5	IGF2BP1	protein_coding	404.109	2.46549	0.25414	5.76647	8.09496e-09	1.0184e-07	DEG
ENSG00000104290.6	FZD3	protein_coding	850.739	3.92405	0.507716	5.75922	8.45027e-09	1.06236e-07	DEG
ENSG00000026950.12	BTN3A1	protein_coding	1407.87	-1.75043	0.130379	-5.75575	8.62589e-09	1.08369e-07	DEG
ENSG00000183734.4	ASCL2	protein_coding	46.647	5.6025	0.801123	5.74507	9.18857e-09	1.15358e-07	DEG
ENSG00000172818.5	OVOL1	protein_coding	46.9886	5.60218	0.801743	5.74021	9.45589e-09	1.18631e-07	DEG
ENSG00000125850.6	OVOL2	protein_coding	46.7852	5.60066	0.801535	5.73982	9.47786e-09	1.18825e-07	DEG
ENSG00000108960.3	MMD	protein_coding	2240.5	1.69149	0.120508	5.73811	9.57408e-09	1.19948e-07	DEG
ENSG00000146411.5	SLC2A12	protein_coding	585.495	-2.35639	0.236419	-5.73725	9.62255e-09	1.20472e-07	DEG
ENSG00000272888.1	AC013394.2	processed_transcript	1435.91	-1.75397	0.13142	-5.73712	9.62974e-09	1.20478e-07	DEG
ENSG00000197183.8	C20orf112	protein_coding	546.65	2.38604	0.241615	5.73656	9.66165e-09	1.20794e-07	DEG
ENSG00000072954.2	TMEM38A	protein_coding	289.218	2.85166	0.323004	5.73262	9.88915e-09	1.23553e-07	DEG
ENSG00000128645.11	HOXD1	protein_coding	53.6777	5.12129	0.719304	5.72955	1.00699e-08	1.25724e-07	DEG
ENSG00000153814.7	JAZF1	protein_coding	767.359	-1.97903	0.170913	-5.72825	1.01475e-08	1.26606e-07	DEG
ENSG00000141524.11	TMC6	protein_coding	271.414	3.29017	0.399922	5.72654	1.02499e-08	1.27795e-07	DEG
ENSG00000132622.6	HSPA12B	protein_coding	128.264	3.63009	0.459382	5.72528	1.03266e-08	1.28663e-07	DEG
ENSG00000105971.10	CAV2	protein_coding	3550.25	-1.57098	0.099774	-5.72271	1.04836e-08	1.30529e-07	DEG
ENSG00000204510.1	PRAMEF7	protein_coding	46.7147	5.59036	0.802612	5.71928	1.06979e-08	1.33105e-07	DEG
ENSG00000196074.8	SYCP2	protein_coding	416.2	2.47305	0.257678	5.71664	1.08649e-08	1.35091e-07	DEG
ENSG00000130176.3	CNN1	protein_coding	6570.45	-1.50031	0.0875267	-5.71612	1.08981e-08	1.35411e-07	DEG
ENSG00000125878.4	TCF15	protein_coding	46.3085	5.58376	0.802555	5.71146	1.12014e-08	1.39083e-07	DEG
ENSG00000170293.4	CMTM8	protein_coding	107.031	3.75928	0.483596	5.70576	1.15824e-08	1.43618e-07	DEG
ENSG00000248429.1	RP11-597D13.9	antisense	69.8673	-4.53436	0.619436	-5.70576	1.15825e-08	1.43618e-07	DEG
ENSG00000256616.2	RP11-815J4.6	pseudogene	130.619	-3.31656	0.406038	-5.70528	1.16153e-08	1.43926e-07	DEG
ENSG00000177606.5	JUN	protein_coding	4230.96	-1.51887	0.0911654	-5.69157	1.25878e-08	1.55869e-07	DEG
ENSG00000119636.11	CCDC176	protein_coding	316.41	-2.46349	0.25742	-5.68521	1.30648e-08	1.61666e-07	DEG
ENSG00000196405.8	EVL	protein_coding	743.739	-2.02629	0.180802	-5.67631	1.37631e-08	1.7019e-07	DEG
ENSG00000270113.1	RP11-282O18.6	lincRNA	45.5207	5.55706	0.80403	5.66778	1.44661e-08	1.78762e-07	DEG
ENSG00000090932.6	DLL3	protein_coding	332.368	2.47977	0.261186	5.66557	1.46534e-08	1.80951e-07	DEG
ENSG00000135452.5	TSPAN31	protein_coding	1107.62	-1.82975	0.146609	-5.65963	1.51699e-08	1.87202e-07	DEG
ENSG00000166897.10	ELFN2	protein_coding	268.639	-2.58084	0.279371	-5.65858	1.52632e-08	1.88225e-07	DEG
ENSG00000180769.4	WDFY3-AS2	processed_transcript	179.514	-2.91765	0.339072	-5.65559	1.55316e-08	1.91405e-07	DEG
ENSG00000144785.4	RP11-977G19.10	protein_coding	245.042	3.22357	0.393205	5.65498	1.5586e-08	1.91945e-07	DEG
ENSG00000008441.12	NFIX	protein_coding	1003.47	-1.94648	0.167405	-5.65382	1.56922e-08	1.93121e-07	DEG
ENSG00000151962.3	RBM46	protein_coding	44.9795	5.54579	0.804302	5.65185	1.58732e-08	1.95215e-07	DEG
ENSG00000172638.8	EFEMP2	protein_coding	1307.89	-1.9673	0.171256	-5.6483	1.6204e-08	1.99047e-07	DEG
ENSG00000233421.3	U1	lincRNA	51.6817	5.07336	0.721169	5.64827	1.62067e-08	1.99047e-07	DEG
ENSG00000134363.7	FST	protein_coding	1229.66	-1.85388	0.151191	-5.64767	1.62634e-08	1.99607e-07	DEG
ENSG00000198959.7	TGM2	protein_coding	6120.68	-1.56264	0.0997985	-5.63779	1.72245e-08	2.1126e-07	DEG
ENSG00000111181.8	SLC6A12	protein_coding	45.4666	5.54094	0.805571	5.63693	1.73111e-08	2.12178e-07	DEG
ENSG00000112312.5	GMNN	protein_coding	2858.07	1.76182	0.135155	5.63666	1.73377e-08	2.12361e-07	DEG
ENSG00000234546.2	RP3-510D11.2	lincRNA	142.539	-3.13912	0.38015	-5.62704	1.83326e-08	2.24395e-07	DEG
ENSG00000116726.4	PRAMEF12	protein_coding	44.3247	5.51924	0.805965	5.60724	2.05577e-08	2.5146e-07	DEG
ENSG00000186318.12	BACE1	protein_coding	3934.32	-1.56763	0.101261	-5.60562	2.07505e-08	2.53647e-07	DEG
ENSG00000156486.7	KCNS2	protein_coding	74.6092	-4.30658	0.590175	-5.60272	2.11012e-08	2.5776e-07	DEG
ENSG00000235649.2	MXRA5P1	pseudogene	52.3406	-5.10371	0.733087	-5.59785	2.17031e-08	2.64933e-07	DEG
ENSG00000138944.7	KIAA1644	protein_coding	617.072	2.08474	0.193858	5.59553	2.19952e-08	2.68318e-07	DEG
ENSG00000140254.8	DUOXA1	protein_coding	68.0047	4.36312	0.601882	5.58768	2.30122e-08	2.80534e-07	DEG
ENSG00000175318.7	GRAMD2	protein_coding	78.8183	4.24772	0.581362	5.58641	2.31817e-08	2.82411e-07	DEG
ENSG00000156869.8	FRRS1	protein_coding	1015.95	-1.88779	0.158971	-5.58462	2.34211e-08	2.85136e-07	DEG
ENSG00000113645.9	WWC1	protein_coding	65.9635	4.52999	0.632241	5.58329	2.36004e-08	2.8674e-07	DEG
ENSG00000127903.12	ZNF835	protein_coding	43.7993	5.50395	0.806666	5.58341	2.35847e-08	2.8674e-07	DEG
ENSG00000170734.7	POLH	protein_coding	1419.69	-1.72134	0.129192	-5.58343	2.35817e-08	2.8674e-07	DEG
ENSG00000085563.10	ABCB1	protein_coding	85.0558	4.16649	0.567383	5.58086	2.39332e-08	2.90587e-07	DEG
ENSG00000169418.9	NPR1	protein_coding	67.2101	4.69364	0.661971	5.57976	2.40857e-08	2.92244e-07	DEG
ENSG00000070010.14	UFD1L	protein_coding	2464.38	1.61702	0.110599	5.5789	2.42048e-08	2.93492e-07	DEG
ENSG00000154678.12	PDE1C	protein_coding	1224.81	-1.83482	0.149846	-5.57119	2.53005e-08	3.06571e-07	DEG
ENSG00000166401.9	SERPINB8	protein_coding	1878.45	1.65572	0.117796	5.56653	2.59861e-08	3.14543e-07	DEG
ENSG00000213977.3	TAX1BP3	protein_coding	12954.2	-1.40353	0.0724948	-5.56637	2.60105e-08	3.14543e-07	DEG
ENSG00000240583.6	AQP1	protein_coding	415.239	2.29423	0.232509	5.56638	2.60092e-08	3.14543e-07	DEG
ENSG00000149599.11	DUSP15	protein_coding	44.7647	5.50035	0.808669	5.56514	2.61949e-08	3.16561e-07	DEG
ENSG00000123572.12	NRK	protein_coding	43.8788	5.4951	0.807749	5.56497	2.62202e-08	3.16655e-07	DEG
ENSG00000182326.10	C1S	protein_coding	5099.7	-2.60665	0.288912	-5.56103	2.68185e-08	3.23664e-07	DEG
ENSG00000176399.3	DMRTA1	protein_coding	107.083	3.67964	0.48195	5.56	2.69777e-08	3.25369e-07	DEG
ENSG00000196616.8	ADH1B	protein_coding	41.2914	-5.49895	0.809593	-5.55705	2.74376e-08	3.30695e-07	DEG
ENSG00000107719.8	PALD1	protein_coding	43.3339	5.48664	0.807667	5.55507	2.77507e-08	3.34246e-07	DEG
ENSG00000159176.9	CSRP1	protein_coding	20556.7	-1.45516	0.0819596	-5.55342	2.80134e-08	3.37186e-07	DEG
ENSG00000167513.4	CDT1	protein_coding	643.544	2.07239	0.193491	5.54235	2.9844e-08	3.58981e-07	DEG
ENSG00000145990.6	GFOD1	protein_coding	915.462	1.9297	0.167754	5.54201	2.99019e-08	3.59439e-07	DEG
ENSG00000204175.4	GPRIN2	protein_coding	43.5578	5.47259	0.809497	5.52515	3.29204e-08	3.95461e-07	DEG
ENSG00000118432.11	CNR1	protein_coding	43.2857	5.47102	0.809332	5.52434	3.30731e-08	3.97031e-07	DEG
ENSG00000140470.9	ADAMTS17	protein_coding	42.8605	5.46782	0.808804	5.52398	3.31401e-08	3.97571e-07	DEG
ENSG00000180921.6	FAM83H	protein_coding	523.397	2.16384	0.210975	5.51649	3.45833e-08	4.1461e-07	DEG
ENSG00000157470.7	FAM81A	protein_coding	208.155	2.82199	0.330469	5.51336	3.52056e-08	4.21791e-07	DEG
ENSG00000188816.3	HMX2	protein_coding	50.3028	5.01871	0.729107	5.51182	3.55146e-08	4.25211e-07	DEG
ENSG00000204950.2	LRRC10B	protein_coding	54.3742	4.86925	0.70212	5.5108	3.57201e-08	4.27389e-07	DEG
ENSG00000147676.9	MAL2	protein_coding	86.0059	3.83553	0.514877	5.5072	3.64594e-08	4.35947e-07	DEG
ENSG00000006453.9	BAIAP2L1	protein_coding	1019.02	2.10376	0.200626	5.50156	3.76445e-08	4.49819e-07	DEG
ENSG00000111348.4	ARHGDIB	protein_coding	51.3358	-4.68083	0.669098	-5.50118	3.7725e-08	4.50484e-07	DEG
ENSG00000116852.10	KIF21B	protein_coding	89.2537	3.92911	0.532474	5.50095	3.77751e-08	4.50784e-07	DEG
ENSG00000106546.8	AHR	protein_coding	8575.55	-1.65179	0.118598	-5.49579	3.88965e-08	4.6386e-07	DEG
ENSG00000171649.7	ZIK1	protein_coding	987.896	1.82353	0.149912	5.49344	3.94178e-08	4.69767e-07	DEG
ENSG00000131374.10	TBC1D5	protein_coding	5421.95	-1.50638	0.0923667	-5.48231	4.1981e-08	4.99986e-07	DEG
ENSG00000204397.3	CARD16	protein_coding	96.8665	-3.70708	0.494784	-5.47123	4.46912e-08	5.31913e-07	DEG
ENSG00000159840.11	ZYX	protein_coding	2011.76	-1.68191	0.124741	-5.46664	4.58657e-08	5.45534e-07	DEG
ENSG00000164438.5	TLX3	protein_coding	42.0122	5.43178	0.811071	5.46411	4.65237e-08	5.52997e-07	DEG
ENSG00000172115.4	CYCS	protein_coding	8568.45	1.44539	0.0815407	5.46217	4.70345e-08	5.587e-07	DEG
ENSG00000050030.9	KIAA2022	protein_coding	42.1951	5.43152	0.811428	5.46138	4.7245e-08	5.60833e-07	DEG
ENSG00000118849.5	RARRES1	protein_coding	372.575	-2.40483	0.257478	-5.45609	4.86722e-08	5.77396e-07	DEG
ENSG00000090539.11	CHRD	protein_coding	591.138	2.12216	0.205716	5.45492	4.89946e-08	5.8084e-07	DEG
ENSG00000204449.2	TRIM49C	protein_coding	41.981	5.42645	0.811545	5.45435	4.91517e-08	5.82321e-07	DEG
ENSG00000244414.2	CFHR1	protein_coding	50.187	-5.02837	0.738702	-5.45331	4.94401e-08	5.85354e-07	DEG
ENSG00000175376.4	EIF1AD	protein_coding	1796.97	1.64379	0.11808	5.45215	4.97638e-08	5.88801e-07	DEG
ENSG00000198477.3	ZNF280B	protein_coding	355.449	2.42863	0.26207	5.45132	4.99982e-08	5.91187e-07	DEG
ENSG00000136944.13	LMX1B	protein_coding	42.9069	5.42919	0.812683	5.45009	5.03442e-08	5.94891e-07	DEG
ENSG00000235961.3	PNMA6C	protein_coding	447.889	2.17472	0.215619	5.44814	5.09006e-08	6.01073e-07	DEG
ENSG00000188641.8	DPYD	protein_coding	3389.78	-1.60043	0.110311	-5.44307	5.23698e-08	6.18019e-07	DEG
ENSG00000175215.5	CTDSP2	protein_coding	7144.88	-1.46207	0.0849961	-5.43637	5.4377e-08	6.41287e-07	DEG
ENSG00000135083.10	CCNJL	protein_coding	231.051	2.6296	0.299806	5.4355	5.46427e-08	6.44e-07	DEG
ENSG00000184347.10	SLIT3	protein_coding	714.072	-2.03744	0.190994	-5.43179	5.57924e-08	6.57123e-07	DEG
ENSG00000198088.6	NUP62CL	protein_coding	42.407	5.18211	0.770006	5.43127	5.59536e-08	6.58592e-07	DEG
ENSG00000198028.3	ZNF560	protein_coding	325.299	2.43615	0.264443	5.43086	5.60819e-08	6.59674e-07	DEG
ENSG00000168398.5	BDKRB2	protein_coding	1419.03	-2.03011	0.189924	-5.42379	5.8347e-08	6.85871e-07	DEG
ENSG00000140807.4	NKD1	protein_coding	41.0713	5.39944	0.812738	5.41311	6.194e-08	7.27634e-07	DEG
ENSG00000178882.9	FAM101A	protein_coding	120.033	3.46273	0.455133	5.41102	6.26685e-08	7.35714e-07	DEG
ENSG00000063854.8	HAGH	protein_coding	746.841	2.0498	0.194059	5.40967	6.31396e-08	7.40764e-07	DEG
ENSG00000173068.13	BNC2	protein_coding	2527.12	-1.72548	0.134127	-5.40891	6.3408e-08	7.43431e-07	DEG
ENSG00000138674.12	SEC31A	protein_coding	19285.8	-1.39843	0.0736884	-5.40701	6.40873e-08	7.50908e-07	DEG
ENSG00000015133.14	CCDC88C	protein_coding	49.2248	4.80761	0.705599	5.39629	6.80337e-08	7.96633e-07	DEG
ENSG00000145476.11	CYP4V2	protein_coding	1515.19	-1.69802	0.129511	-5.38965	7.05941e-08	8.26079e-07	DEG
ENSG00000110074.6	FOXRED1	protein_coding	2741.41	1.55347	0.10273	5.38757	7.14177e-08	8.35176e-07	DEG
ENSG00000163633.6	C4orf36	protein_coding	433.727	-2.23337	0.229091	-5.38376	7.2944e-08	8.52474e-07	DEG
ENSG00000184986.6	TMEM121	protein_coding	914.503	2.0179	0.189085	5.38331	7.31284e-08	8.54077e-07	DEG
ENSG00000109265.8	KIAA1211	protein_coding	82.0305	4.16554	0.588823	5.37604	7.61439e-08	8.88722e-07	DEG
ENSG00000122694.11	GLIPR2	protein_coding	2966.87	-1.56464	0.105033	-5.37581	7.62381e-08	8.89248e-07	DEG
ENSG00000108187.11	PBLD	protein_coding	381.326	-2.38839	0.258276	-5.37561	7.63222e-08	8.89655e-07	DEG
ENSG00000013293.5	SLC7A14	protein_coding	156.844	-3.02899	0.378068	-5.36675	8.01686e-08	9.33889e-07	DEG
ENSG00000267041.1	ZNF850	protein_coding	165.01	2.78506	0.332665	5.36594	8.05273e-08	9.37464e-07	DEG
ENSG00000116544.7	DLGAP3	protein_coding	59.0782	4.66332	0.682896	5.36438	8.12257e-08	9.4438e-07	DEG
ENSG00000143375.10	CGN	protein_coding	46.0016	5.10498	0.765216	5.36447	8.11879e-08	9.4438e-07	DEG
ENSG00000107554.11	DNMBP	protein_coding	1751.84	-1.63854	0.119052	-5.36357	8.15909e-08	9.48016e-07	DEG
ENSG00000108671.5	PSMD11	protein_coding	2262.4	1.66376	0.123772	5.36275	8.19666e-08	9.5177e-07	DEG
ENSG00000186223.4	SSU72P4	pseudogene	40.5905	5.36765	0.815147	5.35812	8.40938e-08	9.75844e-07	DEG
ENSG00000007264.9	MATK	protein_coding	40.9522	5.36862	0.81565	5.356	8.50863e-08	9.86728e-07	DEG
ENSG00000073711.6	PPP2R3A	protein_coding	3309.27	-1.619	0.115703	-5.34994	8.79858e-08	1.0197e-06	DEG
ENSG00000156968.8	MPV17L	protein_coding	171.786	2.84993	0.346092	5.3452	9.0319e-08	1.04607e-06	DEG
ENSG00000196205.7	EEF1A1P5	pseudogene	5675.52	-1.48272	0.0903394	-5.34343	9.12054e-08	1.05566e-06	DEG
ENSG00000189339.7	SLC35E2B	protein_coding	3184.11	-1.5271	0.0987018	-5.34031	9.27893e-08	1.07331e-06	DEG
ENSG00000185483.7	ROR1	protein_coding	1798.16	-1.63416	0.118798	-5.33813	9.39104e-08	1.08558e-06	DEG
ENSG00000161921.10	CXCL16	protein_coding	174.439	3.0056	0.375796	5.33694	9.45268e-08	1.09201e-06	DEG
ENSG00000075340.18	ADD2	protein_coding	40.8137	5.35747	0.816492	5.33682	9.45908e-08	1.09205e-06	DEG
ENSG00000121361.3	KCNJ8	protein_coding	407.376	-2.18811	0.222787	-5.33295	9.66321e-08	1.11491e-06	DEG
ENSG00000171408.9	PDE7B	protein_coding	166.962	-3.4048	0.451083	-5.33116	9.75882e-08	1.12522e-06	DEG
ENSG00000153208.12	MERTK	protein_coding	90.0164	4.18122	0.59683	5.3302	9.81046e-08	1.13045e-06	DEG
ENSG00000172380.5	GNG12	protein_coding	23449.5	-1.36994	0.0694187	-5.32909	9.87043e-08	1.13664e-06	DEG
ENSG00000115009.7	CCL20	protein_coding	39.6756	5.34625	0.815677	5.32839	9.90857e-08	1.1403e-06	DEG
ENSG00000073910.15	FRY	protein_coding	3123.99	-1.62577	0.117648	-5.31903	1.04324e-07	1.19983e-06	DEG
ENSG00000148344.10	PTGES	protein_coding	902.399	1.95321	0.179252	5.31773	1.05068e-07	1.20761e-06	DEG
ENSG00000130402.7	ACTN4	protein_coding	5204.11	-1.6795	0.128307	-5.29589	1.18439e-07	1.36043e-06	DEG
ENSG00000261069.2	SNORD116-20	lincRNA	867.6	1.86412	0.163423	5.28766	1.23892e-07	1.42216e-06	DEG
ENSG00000175445.10	LPL	protein_coding	52.4385	4.75325	0.709863	5.28729	1.24141e-07	1.42412e-06	DEG
ENSG00000048342.11	CC2D2A	protein_coding	868.467	-1.83258	0.157541	-5.28488	1.25786e-07	1.44208e-06	DEG
ENSG00000108846.11	ABCC3	protein_coding	412.866	-2.49821	0.283612	-5.2826	1.27367e-07	1.45927e-06	DEG
ENSG00000178053.13	MLF1	protein_coding	1798.21	1.62625	0.11863	5.27902	1.29876e-07	1.48708e-06	DEG
ENSG00000141452.5	C18orf8	protein_coding	1727.3	1.81026	0.153518	5.27794	1.30644e-07	1.49492e-06	DEG
ENSG00000182796.8	TMEM198B	pseudogene	303.131	-2.47179	0.278949	-5.2762	1.31893e-07	1.50826e-06	DEG
ENSG00000236013.1	RP3-332B22.1	lincRNA	47.5818	-5.05637	0.769005	-5.27483	1.3288e-07	1.51859e-06	DEG
ENSG00000267257.1	RP11-1151B14.4	antisense	64.9718	-4.0441	0.577207	-5.27385	1.33592e-07	1.52577e-06	DEG
ENSG00000123353.5	ORMDL2	protein_coding	3144.31	1.69795	0.132499	5.26755	1.38257e-07	1.57805e-06	DEG
ENSG00000017427.11	IGF1	protein_coding	38.2618	-5.11363	0.781256	-5.2654	1.39884e-07	1.59562e-06	DEG
ENSG00000099849.10	RASSF7	protein_coding	1071.25	1.78002	0.148208	5.26303	1.41702e-07	1.61533e-06	DEG
ENSG00000064547.9	LPAR2	protein_coding	158.756	2.9363	0.36809	5.26038	1.43758e-07	1.63774e-06	DEG
ENSG00000138172.6	CALHM2	protein_coding	1635.8	-1.77197	0.146797	-5.25875	1.45035e-07	1.65125e-06	DEG
ENSG00000166863.7	TAC3	protein_coding	38.5418	5.30199	0.8181	5.25851	1.45225e-07	1.65237e-06	DEG
ENSG00000158106.8	RHPN1	protein_coding	126.769	3.18082	0.414761	5.25801	1.45621e-07	1.65583e-06	DEG
ENSG00000117748.5	RPA2	protein_coding	3721.79	1.49634	0.0944848	5.2531	1.49564e-07	1.6996e-06	DEG
ENSG00000107443.11	CCNJ	protein_coding	627.607	2.1834	0.225316	5.25219	1.503e-07	1.70689e-06	DEG
ENSG00000171130.13	ATP6V0E2	protein_coding	2442.6	1.57052	0.108725	5.24737	1.54288e-07	1.75108e-06	DEG
ENSG00000103152.7	MPG	protein_coding	6724.02	-1.51937	0.099005	-5.24586	1.55552e-07	1.76432e-06	DEG
ENSG00000197020.6	ZNF100	protein_coding	794.607	1.99946	0.190598	5.24381	1.57293e-07	1.78295e-06	DEG
ENSG00000260910.1	LINC00565	lincRNA	131.132	-3.21544	0.422497	-5.24369	1.57401e-07	1.78305e-06	DEG
ENSG00000143320.4	CRABP2	protein_coding	528.645	-2.08454	0.206882	-5.24234	1.58553e-07	1.79498e-06	DEG
ENSG00000223802.3	CERS1	protein_coding	136.946	2.99015	0.380118	5.2356	1.64451e-07	1.86059e-06	DEG
ENSG00000156587.11	UBE2L6	protein_coding	803.573	-1.87859	0.168272	-5.22127	1.77696e-07	2.00919e-06	DEG
ENSG00000119698.7	PPP4R4	protein_coding	385.427	2.33506	0.255728	5.22064	1.78307e-07	2.01484e-06	DEG
ENSG00000145569.5	FAM105A	protein_coding	706.339	1.90071	0.172579	5.21913	1.79766e-07	2.03005e-06	DEG
ENSG00000139266.5	MARCH9	protein_coding	754.429	1.90179	0.17283	5.21777	1.81088e-07	2.0437e-06	DEG
ENSG00000112218.7	GPR63	protein_coding	88.5479	3.58683	0.495872	5.21674	1.82099e-07	2.05384e-06	DEG
ENSG00000171119.2	NRTN	protein_coding	71.0305	3.88914	0.554325	5.212	1.86816e-07	2.10573e-06	DEG
ENSG00000169242.7	EFNA1	protein_coding	37.8888	5.27135	0.819978	5.2091	1.89754e-07	2.13751e-06	DEG
ENSG00000245694.4	CRNDE	lincRNA	901.349	-1.89039	0.170972	-5.20779	1.91105e-07	2.15139e-06	DEG
ENSG00000152402.6	GUCY1A2	protein_coding	3000.72	-3.57442	0.494985	-5.20101	1.98212e-07	2.23001e-06	DEG
ENSG00000133083.10	DCLK1	protein_coding	840.324	-1.84032	0.161574	-5.20085	1.98382e-07	2.23054e-06	DEG
ENSG00000134769.17	DTNA	protein_coding	426.746	2.33417	0.256541	5.20061	1.98636e-07	2.23201e-06	DEG
ENSG00000113722.12	CDX1	protein_coding	39.5682	-5.04295	0.777658	-5.19888	2.00496e-07	2.2515e-06	DEG
ENSG00000164292.8	RHOBTB3	protein_coding	6358.11	-1.4539	0.0873134	-5.19854	2.00862e-07	2.25421e-06	DEG
UL148C	UL148C	CMV	37.5694	5.26177	0.820367	5.19496	2.04763e-07	2.29657e-06	DEG
ENSG00000102452.11	NALCN	protein_coding	109.274	3.32084	0.447504	5.18619	2.14636e-07	2.40582e-06	DEG
ENSG00000167123.14	CERCAM	protein_coding	6305.19	-1.41858	0.0807142	-5.18591	2.14968e-07	2.40804e-06	DEG
ENSG00000184489.7	PTP4A3	protein_coding	273.225	2.4171	0.273406	5.18313	2.18196e-07	2.44269e-06	DEG
ENSG00000109062.5	SLC9A3R1	protein_coding	1921.74	1.66645	0.128588	5.18287	2.18492e-07	2.44449e-06	DEG
ENSG00000228549.2	U1	lincRNA	62.3869	4.09711	0.597616	5.18244	2.19007e-07	2.44873e-06	DEG
ENSG00000139800.8	ZIC5	protein_coding	37.6818	5.25572	0.821204	5.1823	2.19167e-07	2.44901e-06	DEG
ENSG00000136859.5	ANGPTL2	protein_coding	794	-1.99873	0.192804	-5.18003	2.21846e-07	2.47741e-06	DEG
ENSG00000072840.8	EVC	protein_coding	1451.18	-1.70876	0.136853	-5.17897	2.23116e-07	2.49007e-06	DEG
ENSG00000185519.8	FAM131C	protein_coding	115.753	3.177	0.420424	5.1781	2.24155e-07	2.50012e-06	DEG
ENSG00000116005.7	PCYOX1	protein_coding	4624.42	-1.46775	0.0904092	-5.1737	2.29507e-07	2.55823e-06	DEG
ENSG00000198339.3	HIST1H4I	protein_coding	1501.21	-1.835	0.1614	-5.17347	2.2978e-07	2.5597e-06	DEG
ENSG00000258498.2	DIO3OS	lincRNA	55.9173	-4.15323	0.609796	-5.17096	2.32899e-07	2.59285e-06	DEG
ENSG00000188290.6	HES4	protein_coding	1967.54	1.74526	0.144175	5.16914	2.35172e-07	2.61654e-06	DEG
ENSG00000173698.13	GPR64	protein_coding	37.4751	5.24679	0.821714	5.16821	2.36344e-07	2.62796e-06	DEG
ENSG00000157765.7	SLC34A2	protein_coding	37.1374	5.24345	0.821415	5.16603	2.39118e-07	2.65717e-06	DEG
ENSG00000187672.8	ERC2	protein_coding	71.3234	4.18008	0.615976	5.16267	2.4345e-07	2.70365e-06	DEG
ENSG00000106025.4	TSPAN12	protein_coding	108.569	3.28793	0.443797	5.15535	2.53156e-07	2.80972e-06	DEG
ENSG00000196208.9	GREB1	protein_coding	37.2889	5.23784	0.822195	5.1543	2.54576e-07	2.82375e-06	DEG
ENSG00000167447.8	SMG8	protein_coding	4943.81	1.47163	0.0915139	5.15367	2.5544e-07	2.83159e-06	DEG
ENSG00000139269.2	INHBE	protein_coding	418.039	-2.5052	0.292295	-5.1496	2.61037e-07	2.89187e-06	DEG
ENSG00000145220.9	LYAR	protein_coding	613.99	1.96897	0.18837	5.144	2.68955e-07	2.97776e-06	DEG
ENSG00000237187.4	NR2F1-AS1	processed_transcript	743.161	-1.90803	0.176717	-5.13832	2.77212e-07	3.0673e-06	DEG
ENSG00000113811.6	SELK	protein_coding	3807.12	1.57725	0.112382	5.13646	2.79955e-07	3.09576e-06	DEG
ENSG00000181856.10	SLC2A4	protein_coding	53.8917	4.55826	0.692839	5.13577	2.80987e-07	3.10527e-06	DEG
ENSG00000115297.9	TLX2	protein_coding	40.2771	4.99157	0.777324	5.13502	2.82113e-07	3.11582e-06	DEG
ENSG00000156802.8	ATAD2	protein_coding	7261.37	1.4352	0.0847616	5.13442	2.83022e-07	3.12395e-06	DEG
ENSG00000179542.11	SLITRK4	protein_coding	38.7453	5.23406	0.825081	5.13168	2.87163e-07	3.16772e-06	DEG
ENSG00000168267.5	PTF1A	protein_coding	36.769	5.22225	0.82285	5.13125	2.87825e-07	3.17309e-06	DEG
ENSG00000229292.1	RFPL4AL1	protein_coding	36.6152	5.22082	0.82269	5.13051	2.88962e-07	3.18369e-06	DEG
ENSG00000151623.10	NR3C2	protein_coding	133.001	3.04855	0.399696	5.12528	2.9709e-07	3.27124e-06	DEG
ENSG00000198417.5	MT1F	protein_coding	53.6064	4.55957	0.695343	5.11916	3.069e-07	3.37721e-06	DEG
ENSG00000160223.12	ICOSLG	protein_coding	255.485	2.47525	0.28823	5.1183	3.08307e-07	3.39063e-06	DEG
ENSG00000152315.4	KCNK13	protein_coding	53.891	4.55422	0.694574	5.11712	3.10235e-07	3.40976e-06	DEG
ENSG00000106789.8	CORO2A	protein_coding	276.217	2.38794	0.271506	5.11199	3.18782e-07	3.50157e-06	DEG
ENSG00000184613.6	NELL2	protein_coding	59.8417	4.45849	0.677008	5.1085	3.24724e-07	3.56467e-06	DEG
ENSG00000104783.7	KCNN4	protein_coding	72.5647	3.88902	0.565562	5.10822	3.25205e-07	3.56779e-06	DEG
ENSG00000164690.3	SHH	protein_coding	41.5625	5.03337	0.790455	5.10259	3.35031e-07	3.67336e-06	DEG
ENSG00000163377.10	FAM19A4	protein_coding	39.7285	5.22126	0.828001	5.09813	3.43023e-07	3.75871e-06	DEG
ENSG00000188883.4	KLRG2	protein_coding	36.1356	5.19941	0.823921	5.09686	3.45341e-07	3.78182e-06	DEG
ENSG00000215251.3	FASTKD5	protein_coding	2622.15	1.56131	0.110138	5.09643	3.46118e-07	3.78803e-06	DEG
ENSG00000168135.4	KCNJ4	protein_coding	36.2755	5.19861	0.824282	5.09366	3.51219e-07	3.84154e-06	DEG
ENSG00000171492.10	LRRC8D	protein_coding	2927.59	-1.54231	0.106499	-5.09213	3.54056e-07	3.87023e-06	DEG
ENSG00000154229.7	PRKCA	protein_coding	3196.17	-1.5506	0.108205	-5.08849	3.60926e-07	3.94294e-06	DEG
ENSG00000174951.6	FUT1	protein_coding	134.378	3.15086	0.42279	5.0873	3.63189e-07	3.96527e-06	DEG
ENSG00000214491.4	SEC14L6	protein_coding	42.7322	4.72057	0.731587	5.08562	3.66434e-07	3.99828e-06	DEG
ENSG00000131242.11	RAB11FIP4	protein_coding	116.682	4.15477	0.621303	5.07767	3.82096e-07	4.16667e-06	DEG
ENSG00000097046.8	CDC7	protein_coding	821.447	2.00066	0.197431	5.06841	4.01147e-07	4.37178e-06	DEG
ENSG00000153933.5	DGKE	protein_coding	1250.04	1.73037	0.14424	5.06358	4.11449e-07	4.48135e-06	DEG
ENSG00000089472.12	HEPH	protein_coding	214.532	-2.53067	0.302311	-5.06322	4.12226e-07	4.48712e-06	DEG
ENSG00000183856.6	IQGAP3	protein_coding	390.463	-2.33506	0.263732	-5.06218	4.14489e-07	4.50903e-06	DEG
ENSG00000183580.8	FBXL7	protein_coding	1396.18	-1.65589	0.129674	-5.05798	4.23718e-07	4.60665e-06	DEG
ENSG00000065361.10	ERBB3	protein_coding	267.381	2.48038	0.292848	5.05512	4.30131e-07	4.67357e-06	DEG
ENSG00000168685.10	IL7R	protein_coding	1157.72	-1.80438	0.159456	-5.04455	4.54592e-07	4.93639e-06	DEG
ENSG00000171723.11	GPHN	protein_coding	1345.74	1.69275	0.13741	5.04149	4.61914e-07	5.01289e-06	DEG
ENSG00000237807.3	RP11-400K9.4	lincRNA	44.3933	-4.6366	0.721478	-5.04049	4.64339e-07	5.03619e-06	DEG
ENSG00000263934.2	SNORD3A	lincRNA	2378.75	-1.70155	0.139205	-5.0397	4.66254e-07	5.05393e-06	DEG
ENSG00000171877.15	FRMD5	protein_coding	433.158	2.40264	0.2784	5.03823	4.69864e-07	5.09001e-06	DEG
ENSG00000184305.10	CCSER1	protein_coding	35.6008	5.16147	0.826687	5.03391	4.80578e-07	5.20295e-06	DEG
ENSG00000102109.7	PCSK1N	protein_coding	39.7441	4.93235	0.782118	5.02782	4.96094e-07	5.36773e-06	DEG
ENSG00000100106.15	TRIOBP	protein_coding	6197.43	-1.44693	0.0889013	-5.02728	4.97489e-07	5.3796e-06	DEG
ENSG00000168824.10	NSG1	protein_coding	86.7347	3.91456	0.580846	5.01778	5.22716e-07	5.64902e-06	DEG
ENSG00000153233.8	PTPRR	protein_coding	200.028	3.26239	0.451005	5.01634	5.26664e-07	5.68829e-06	DEG
ENSG00000077327.11	SPAG6	protein_coding	35.5505	5.15129	0.827574	5.01621	5.27008e-07	5.68861e-06	DEG
ENSG00000273038.1	RP11-479G22.8	lincRNA	128.7	-2.95676	0.390605	-5.00957	5.45527e-07	5.88499e-06	DEG
ENSG00000116161.13	CACYBP	protein_coding	6061.56	1.41932	0.0837297	5.00804	5.49865e-07	5.92472e-06	DEG
ENSG00000184357.3	HIST1H1B	protein_coding	11054.3	-1.47012	0.0938716	-5.00815	5.49558e-07	5.92472e-06	DEG
ENSG00000258839.2	MC1R	protein_coding	359.575	-2.21821	0.24326	-5.00782	5.50488e-07	5.9279e-06	DEG
ENSG00000130396.16	MLLT4	protein_coding	3275.24	1.71658	0.143191	5.00436	5.60477e-07	6.03188e-06	DEG
ENSG00000189253.7	TRIM64B	protein_coding	35.5758	5.1443	0.828306	5.00334	5.63442e-07	6.06018e-06	DEG
ENSG00000250305.4	KIAA1456	protein_coding	702.76	-2.08869	0.218061	-4.99258	5.95775e-07	6.40414e-06	DEG
ENSG00000067840.8	PDZD4	protein_coding	69.8045	4.03664	0.608289	4.9921	5.97267e-07	6.41636e-06	DEG
ENSG00000187838.12	TMEM256-PLSCR3	protein_coding	725.208	-1.98318	0.197142	-4.98719	6.12638e-07	6.57758e-06	DEG
ENSG00000156299.8	TIAM1	protein_coding	61.8193	4.32573	0.667129	4.98514	6.19159e-07	6.64366e-06	DEG
ENSG00000167779.3	IGFBP6	protein_coding	5416.32	-1.48925	0.098151	-4.98465	6.20734e-07	6.6566e-06	DEG
ENSG00000085063.10	CD59	protein_coding	29697.9	-1.33732	0.0676824	-4.98393	6.23058e-07	6.67757e-06	DEG
ENSG00000246273.2	SBF2-AS1	antisense	389.438	-2.56364	0.313977	-4.98009	6.35555e-07	6.80748e-06	DEG
ENSG00000161992.5	C16orf11	protein_coding	47.1343	4.58955	0.7208	4.97995	6.35993e-07	6.80814e-06	DEG
ENSG00000196532.4	HIST1H3C	protein_coding	3900.04	-1.59011	0.118809	-4.96691	6.80271e-07	7.27781e-06	DEG
ENSG00000151882.7	CCL28	protein_coding	249.913	2.43149	0.288224	4.96659	6.81403e-07	7.28561e-06	DEG
ENSG00000173482.12	PTPRM	protein_coding	2688.31	-1.54136	0.109125	-4.96087	7.01787e-07	7.49913e-06	DEG
ENSG00000187741.10	FANCA	protein_coding	1390.58	1.67837	0.136766	4.96005	7.04739e-07	7.52623e-06	DEG
ENSG00000152669.8	CCNO	protein_coding	34.2377	5.11119	0.829008	4.95917	7.07955e-07	7.55611e-06	DEG
ENSG00000259627.1	RP11-244F12.2	antisense	85.8553	-3.43045	0.490882	-4.95118	7.37635e-07	7.86825e-06	DEG
ENSG00000260833.2	AC124789.1	processed_transcript	365.789	-2.20434	0.243388	-4.94825	7.48846e-07	7.98313e-06	DEG
ENSG00000156876.8	SASS6	protein_coding	1580.8	1.66996	0.135422	4.94721	7.52845e-07	8.02104e-06	DEG
ENSG00000087842.6	PIR	protein_coding	255.196	-2.38522	0.28047	-4.93892	7.8555e-07	8.36456e-06	DEG
ENSG00000150995.13	ITPR1	protein_coding	541.359	2.13934	0.230776	4.93701	7.93299e-07	8.4421e-06	DEG
ENSG00000182220.9	ATP6AP2	protein_coding	14477.6	-1.369	0.0747628	-4.93566	7.98805e-07	8.49569e-06	DEG
ENSG00000197444.5	OGDHL	protein_coding	38.8424	4.88556	0.787293	4.93534	8.00125e-07	8.50474e-06	DEG
ENSG00000171488.10	LRRC8C	protein_coding	2532.95	1.52992	0.107388	4.93467	8.02875e-07	8.52896e-06	DEG
ENSG00000162390.13	ACOT11	protein_coding	223.561	2.46543	0.297205	4.93072	8.19279e-07	8.69811e-06	DEG
ENSG00000137713.11	PPP2R1B	protein_coding	3916.45	1.45736	0.092792	4.92884	8.2718e-07	8.77684e-06	DEG
ENSG00000215039.2	CD27-AS1	antisense	727.286	-1.85772	0.17405	-4.92802	8.30687e-07	8.80888e-06	DEG
ENSG00000165025.10	SYK	protein_coding	34.3896	5.09333	0.831034	4.92558	8.41083e-07	8.91391e-06	DEG
ENSG00000189320.4	FAM180A	protein_coding	459.73	-2.1657	0.236728	-4.92424	8.46907e-07	8.97037e-06	DEG
ENSG00000127399.10	LRRC61	protein_coding	131.332	2.98351	0.403252	4.91878	8.70862e-07	9.2187e-06	DEG
ENSG00000214688.4	C10orf105	protein_coding	35.5494	-4.87454	0.788622	-4.91305	8.96699e-07	9.48666e-06	DEG
ENSG00000154262.8	ABCA6	protein_coding	231.053	-2.85027	0.376903	-4.90913	9.14792e-07	9.67241e-06	DEG
ENSG00000116574.4	RHOU	protein_coding	406.888	2.11528	0.227202	4.90874	9.16642e-07	9.68631e-06	DEG
ENSG00000180616.4	SSTR2	protein_coding	85.5808	3.85624	0.582009	4.90755	9.22224e-07	9.73961e-06	DEG
ENSG00000254858.5	MPV17L2	protein_coding	963.821	1.75121	0.153222	4.90276	9.44998e-07	9.9743e-06	DEG
ENSG00000006634.3	DBF4	protein_coding	2070.89	1.57307	0.116923	4.90128	9.52139e-07	1.00438e-05	DEG
ENSG00000205220.7	PSMB10	protein_coding	1512.93	-1.69169	0.141151	-4.90039	9.56463e-07	1.00836e-05	DEG
ENSG00000126259.15	KIRREL2	protein_coding	63.8008	4.1406	0.64096	4.89984	9.59169e-07	1.01062e-05	DEG
ENSG00000105429.8	MEGF8	protein_coding	1162.47	-1.82802	0.169111	-4.89633	9.76432e-07	1.02821e-05	DEG
ENSG00000175746.4	C15orf54	protein_coding	41.1793	-4.54283	0.72418	-4.8922	9.97155e-07	1.04942e-05	DEG
ENSG00000166949.11	SMAD3	protein_coding	3147.99	-1.47428	0.0969754	-4.89077	1.0044e-06	1.05643e-05	DEG
ENSG00000183605.12	SFXN4	protein_coding	1458.26	1.62724	0.128357	4.88671	1.02534e-06	1.07782e-05	DEG
ENSG00000166562.4	SEC11C	protein_coding	1990.45	1.91565	0.187691	4.87852	1.06887e-06	1.12293e-05	DEG
ENSG00000146733.9	PSPH	protein_coding	1161.05	-1.74399	0.152618	-4.87484	1.08899e-06	1.14341e-05	DEG
ENSG00000010704.14	HFE	protein_coding	739.841	-2.34084	0.275784	-4.86191	1.16257e-06	1.21995e-05	DEG
ENSG00000067992.8	PDK3	protein_coding	721.906	1.87633	0.180256	4.86159	1.16447e-06	1.22124e-05	DEG
ENSG00000178150.4	ZNF114	protein_coding	44.8422	4.49932	0.719928	4.86065	1.16999e-06	1.22632e-05	DEG
ENSG00000124659.5	TBCC	protein_coding	2888.21	1.53599	0.11038	4.85589	1.19849e-06	1.25547e-05	DEG
ENSG00000049541.6	RFC2	protein_coding	2058.18	1.5961	0.122816	4.85361	1.21233e-06	1.26923e-05	DEG
ENSG00000260807.2	RP11-161M6.2	lincRNA	100.238	3.69789	0.555906	4.85314	1.21522e-06	1.27152e-05	DEG
ENSG00000119139.12	TJP2	protein_coding	1239.34	1.70546	0.145541	4.84719	1.25221e-06	1.30946e-05	DEG
ENSG00000123136.10	DDX39A	protein_coding	1924.8	1.58895	0.121742	4.83767	1.31367e-06	1.37295e-05	DEG
ENSG00000157680.11	DGKI	protein_coding	635.475	-2.27822	0.264319	-4.83591	1.32541e-06	1.38441e-05	DEG
ENSG00000049089.9	COL9A2	protein_coding	164.133	3.0407	0.422469	4.83042	1.36245e-06	1.42215e-05	DEG
ENSG00000157358.7	PRAMEF15	protein_coding	32.602	5.028	0.833898	4.83032	1.36311e-06	1.42215e-05	DEG
ENSG00000164542.8	KIAA0895	protein_coding	800.443	1.96544	0.199882	4.83007	1.36487e-06	1.42317e-05	DEG
ENSG00000008323.11	PLEKHG6	protein_coding	51.9903	4.31711	0.686791	4.82986	1.36626e-06	1.42379e-05	DEG
ENSG00000197894.6	ADH5	protein_coding	22700.2	-1.34866	0.0721986	-4.82915	1.37118e-06	1.42809e-05	DEG
ENSG00000166035.6	LIPC	protein_coding	49.6615	-4.28012	0.67928	-4.82883	1.37339e-06	1.42957e-05	DEG
ENSG00000115112.7	TFCP2L1	protein_coding	36.9609	4.80989	0.789343	4.82666	1.38843e-06	1.44357e-05	DEG
ENSG00000232423.3	PRAMEF6	protein_coding	33.1099	5.02911	0.834754	4.8267	1.38815e-06	1.44357e-05	DEG
ENSG00000215114.3	UBXN2B	protein_coding	1945.84	-1.60639	0.125643	-4.82629	1.39103e-06	1.44544e-05	DEG
ENSG00000132481.2	TRIM47	protein_coding	997.291	1.85062	0.176339	4.82378	1.4086e-06	1.46286e-05	DEG
ENSG00000054654.11	SYNE2	protein_coding	3852.87	2.49756	0.310482	4.82333	1.41178e-06	1.46532e-05	DEG
ENSG00000116962.10	NID1	protein_coding	3986.76	-1.48302	0.100166	-4.8222	1.41987e-06	1.47287e-05	DEG
ENSG00000139971.11	C14orf37	protein_coding	401.342	2.10539	0.22927	4.82132	1.42609e-06	1.47847e-05	DEG
ENSG00000270069.1	RP6-99M1.2	lincRNA	195.557	-2.65156	0.343103	-4.8136	1.48235e-06	1.53593e-05	DEG
ENSG00000071575.7	TRIB2	protein_coding	1516.52	-1.76278	0.158522	-4.81183	1.49553e-06	1.54869e-05	DEG
ENSG00000196517.7	SLC6A9	protein_coding	339.466	-2.19445	0.248611	-4.80447	1.55158e-06	1.60582e-05	DEG
ENSG00000186594.8	MIR22HG	lincRNA	1929.85	-1.58799	0.122392	-4.80412	1.55434e-06	1.60775e-05	DEG
ENSG00000166411.9	IDH3A	protein_coding	2060.37	1.6521	0.13581	4.80159	1.57411e-06	1.62727e-05	DEG
ENSG00000163017.9	ACTG2	protein_coding	46.8062	-4.44948	0.719391	-4.795	1.62677e-06	1.68069e-05	DEG
US7	US7	CMV	32.0363	5.00414	0.835085	4.79489	1.62764e-06	1.68069e-05	DEG
ENSG00000167740.5	CYB5D2	protein_coding	1514.46	-1.60551	0.12631	-4.79389	1.6358e-06	1.68815e-05	DEG
ENSG00000095637.16	SORBS1	protein_coding	476.364	2.20235	0.250864	4.79284	1.6444e-06	1.69605e-05	DEG
ENSG00000167604.9	NFKBID	protein_coding	255.386	2.49018	0.311131	4.78956	1.67145e-06	1.72298e-05	DEG
ENSG00000163053.6	SLC16A14	protein_coding	229.67	2.73185	0.36161	4.78929	1.6737e-06	1.72432e-05	DEG
ENSG00000235531.5	RP11-383H13.1	protein_coding	677.453	-2.37871	0.287918	-4.78855	1.67991e-06	1.72973e-05	DEG
ENSG00000170113.11	NIPA1	protein_coding	3746.73	1.52803	0.110328	4.78602	1.70123e-06	1.75068e-05	DEG
ENSG00000197914.2	HIST1H4K	protein_coding	2332.95	-1.79436	0.166042	-4.78409	1.71767e-06	1.7666e-05	DEG
ENSG00000049449.4	RCN1	protein_coding	11119.3	-1.39872	0.0833762	-4.7822	1.73389e-06	1.78226e-05	DEG
ENSG00000167995.11	BEST1	protein_coding	1075.24	-1.75226	0.15732	-4.78172	1.73805e-06	1.78552e-05	DEG
ENSG00000128606.8	LRRC17	protein_coding	156.159	-2.9075	0.400302	-4.76516	1.88704e-06	1.93748e-05	DEG
ENSG00000151287.12	TEX30	protein_coding	1127.35	1.77563	0.163072	4.7564	1.97073e-06	2.02226e-05	DEG
ENSG00000198830.6	HMGN2	protein_coding	8362.13	-1.44374	0.0933076	-4.7557	1.97759e-06	2.02815e-05	DEG
ENSG00000139910.15	NOVA1	protein_coding	35.2035	4.77764	0.794935	4.75214	2.0128e-06	2.06309e-05	DEG
ENSG00000225733.1	FGD5-AS1	antisense	8062.21	-1.37661	0.0793213	-4.74797	2.05469e-06	2.10484e-05	DEG
ENSG00000138639.13	ARHGAP24	protein_coding	632.792	-1.88454	0.186692	-4.738	2.15839e-06	2.20982e-05	DEG
ENSG00000168242.3	HIST1H2BI	protein_coding	2804.72	-1.58297	0.123103	-4.7356	2.18403e-06	2.2348e-05	DEG
ENSG00000163739.4	CXCL1	protein_coding	290.894	2.26866	0.267912	4.73538	2.18647e-06	2.23603e-05	DEG
ENSG00000158246.7	FAM46B	protein_coding	614.466	1.91543	0.193365	4.7342	2.19924e-06	2.24782e-05	DEG
ENSG00000250742.1	RP11-834C11.4	lincRNA	277.353	2.38841	0.293309	4.73363	2.20545e-06	2.25289e-05	DEG
ENSG00000162493.12	PDPN	protein_coding	869.642	1.96878	0.204714	4.73234	2.2195e-06	2.26597e-05	DEG
ENSG00000186635.10	ARAP1	protein_coding	3235.76	-1.49459	0.10458	-4.72929	2.25304e-06	2.29891e-05	DEG
ENSG00000162174.8	ASRGL1	protein_coding	137.077	3.0358	0.430613	4.72768	2.271e-06	2.31593e-05	DEG
ENSG00000161055.3	SCGB3A1	protein_coding	44.7706	4.36899	0.712764	4.72665	2.28255e-06	2.3264e-05	DEG
ENSG00000168453.10	HR	protein_coding	425.825	2.27486	0.269768	4.72577	2.2925e-06	2.33522e-05	DEG
ENSG00000180720.6	CHRM4	protein_coding	31.1057	4.95746	0.837684	4.72429	2.30923e-06	2.35095e-05	DEG
ENSG00000185924.6	RTN4RL1	protein_coding	63.6826	3.69605	0.571768	4.71529	2.41366e-06	2.45588e-05	DEG
ENSG00000178996.8	SNX18	protein_coding	7680.3	-1.37678	0.0799445	-4.71307	2.44008e-06	2.48136e-05	DEG
ENSG00000151640.8	DPYSL4	protein_coding	149.667	2.79045	0.380179	4.70949	2.48342e-06	2.52402e-05	DEG
ENSG00000131398.9	KCNC3	protein_coding	32.6383	4.95778	0.84046	4.70907	2.48852e-06	2.52778e-05	DEG
ENSG00000101670.7	LIPG	protein_coding	621.151	1.87954	0.1868	4.70845	2.49606e-06	2.53402e-05	DEG
ENSG00000040531.10	CTNS	protein_coding	2574	1.48702	0.103487	4.70609	2.52507e-06	2.56204e-05	DEG
ENSG00000174791.6	RIN1	protein_coding	765.296	-1.95153	0.202374	-4.70185	2.57813e-06	2.6144e-05	DEG
ENSG00000110675.8	ELMOD1	protein_coding	71.777	3.50206	0.532855	4.69558	2.6585e-06	2.69439e-05	DEG
ENSG00000144815.10	NXPE3	protein_coding	1818.67	-1.56317	0.120044	-4.69141	2.71333e-06	2.74842e-05	DEG
ENSG00000211772.4	TRBC2	TR_C_gene	121.213	-3.25801	0.481342	-4.69107	2.71781e-06	2.75142e-05	DEG
ENSG00000186462.7	NAP1L2	protein_coding	30.6644	4.93145	0.83926	4.68442	2.80753e-06	2.84066e-05	DEG
ENSG00000174607.6	UGT8	protein_coding	30.9847	4.93098	0.839885	4.68038	2.86339e-06	2.89539e-05	DEG
ENSG00000197846.3	HIST1H2BF	protein_coding	1989.78	-1.68076	0.145452	-4.68028	2.86482e-06	2.89539e-05	DEG
ENSG00000088992.13	TESC	protein_coding	43.2606	4.43287	0.733578	4.67963	2.8739e-06	2.90295e-05	DEG
ENSG00000137462.6	TLR2	protein_coding	788.2	1.79226	0.169382	4.67738	2.90563e-06	2.93336e-05	DEG
ENSG00000132361.12	CLUH	protein_coding	2971.08	1.57588	0.123146	4.67643	2.91905e-06	2.94526e-05	DEG
ENSG00000040487.8	PQLC2	protein_coding	2049.49	1.57128	0.12219	4.67529	2.93533e-06	2.96003e-05	DEG
ENSG00000131981.11	LGALS3	protein_coding	4883.58	-1.41133	0.0880028	-4.67408	2.9528e-06	2.97599e-05	DEG
ENSG00000111801.11	BTN3A3	protein_coding	322.382	-2.18881	0.254447	-4.67213	2.98086e-06	3.00261e-05	DEG
ENSG00000178149.12	DALRD3	protein_coding	1252.11	-1.70098	0.150091	-4.6704	3.00614e-06	3.02638e-05	DEG
ENSG00000255194.2	SSU72P2	pseudogene	30.383	4.91905	0.839867	4.66628	3.06706e-06	3.08599e-05	DEG
ENSG00000171903.12	CYP4F11	protein_coding	30.5685	4.91777	0.840336	4.66215	3.12927e-06	3.14684e-05	DEG
ENSG00000100479.8	POLE2	protein_coding	913.075	1.7719	0.165772	4.65639	3.21797e-06	3.23423e-05	DEG
ENSG00000170537.8	TMC7	protein_coding	154.953	2.7331	0.372247	4.65577	3.22767e-06	3.24219e-05	DEG
ENSG00000118513.14	MYB	protein_coding	82.7898	3.7547	0.591801	4.65477	3.24348e-06	3.25626e-05	DEG
ENSG00000070366.9	SMG6	protein_coding	2229.82	-1.60971	0.131084	-4.65134	3.29791e-06	3.30906e-05	DEG
ENSG00000168930.9	TRIM49	protein_coding	37.0981	4.66107	0.787577	4.64853	3.34313e-06	3.35258e-05	DEG
ENSG00000165194.10	PCDH19	protein_coding	37.4476	4.53416	0.760769	4.64551	3.39229e-06	3.4e-05	DEG
ENSG00000164142.11	FAM160A1	protein_coding	143.854	2.78973	0.385321	4.64477	3.40455e-06	3.41039e-05	DEG
ENSG00000142149.4	HUNK	protein_coding	199.544	2.53738	0.331126	4.64289	3.43563e-06	3.43962e-05	DEG
ENSG00000120438.7	TCP1	protein_coding	28640.9	1.3515	0.0757517	4.64015	3.4816e-06	3.48372e-05	DEG
ENSG00000115539.9	PDCL3	protein_coding	570.89	1.91105	0.196467	4.63716	3.53222e-06	3.53241e-05	DEG
ENSG00000183814.11	LIN9	protein_coding	1641.44	1.59151	0.127676	4.63289	3.60602e-06	3.60423e-05	DEG
ENSG00000004864.9	SLC25A13	protein_coding	638.036	2.02675	0.2217	4.63127	3.63429e-06	3.63048e-05	DEG
ENSG00000107731.8	UNC5B	protein_coding	3190.33	-1.46827	0.101125	-4.63065	3.64514e-06	3.63931e-05	DEG
ENSG00000139629.11	GALNT6	protein_coding	3202.25	-1.54454	0.117674	-4.62752	3.70079e-06	3.69283e-05	DEG
ENSG00000188848.11	BEND4	protein_coding	29.9033	4.89301	0.841344	4.62713	3.70763e-06	3.69762e-05	DEG
ENSG00000254093.4	PINX1	protein_coding	1444.95	1.66719	0.1443	4.62365	3.77047e-06	3.75821e-05	DEG
ENSG00000260604.1	RP1-140K8.5	lincRNA	62.6597	-3.75382	0.597281	-4.61059	4.01536e-06	4.0001e-05	DEG
ENSG00000127252.4	HRASLS	protein_coding	29.8386	4.88182	0.842273	4.60874	4.05123e-06	4.03361e-05	DEG
ENSG00000050555.13	LAMC3	protein_coding	50.7738	4.40992	0.74048	4.60502	4.1243e-06	4.10411e-05	DEG
ENSG00000251258.1	RFPL4B	protein_coding	71.889	3.42564	0.526782	4.60464	4.13185e-06	4.10936e-05	DEG
ENSG00000118292.4	C1orf54	protein_coding	190.728	-2.62709	0.353691	-4.6003	4.21876e-06	4.1935e-05	DEG
ENSG00000130045.11	NXNL2	protein_coding	93.1561	-3.10415	0.457444	-4.5998	4.229e-06	4.20137e-05	DEG
ENSG00000205221.8	VIT	protein_coding	34.9354	-4.42782	0.745324	-4.59911	4.24307e-06	4.21303e-05	DEG
ENSG00000130433.3	CACNG6	protein_coding	37.8681	4.50567	0.762521	4.59747	4.27654e-06	4.24283e-05	DEG
ENSG00000133816.9	MICAL2	protein_coding	3169.54	-1.44546	0.0968928	-4.59741	4.27778e-06	4.24283e-05	DEG
ENSG00000003096.9	KLHL13	protein_coding	253.265	2.29863	0.282876	4.59079	4.41567e-06	4.3748e-05	DEG
ENSG00000154655.10	L3MBTL4	protein_coding	34.8043	4.64689	0.794378	4.59087	4.41398e-06	4.3748e-05	DEG
ENSG00000169860.4	P2RY1	protein_coding	29.7908	4.87055	0.843236	4.59011	4.43003e-06	4.38663e-05	DEG
ENSG00000247626.3	MARS2	protein_coding	1193.86	1.63999	0.139527	4.58682	4.50041e-06	4.45388e-05	DEG
ENSG00000010932.11	FMO1	protein_coding	33.9801	-4.6448	0.795031	-4.58447	4.55139e-06	4.50187e-05	DEG
ENSG00000257446.2	ZNF878	protein_coding	92.3515	3.21991	0.484948	4.57763	4.70273e-06	4.64902e-05	DEG
ENSG00000145779.7	TNFAIP8	protein_coding	1595	-1.57633	0.126032	-4.57288	4.81075e-06	4.75321e-05	DEG
ENSG00000187796.9	CARD9	protein_coding	181.8	-2.53325	0.335506	-4.56997	4.87782e-06	4.81685e-05	DEG
ENSG00000108688.7	CCL7	protein_coding	66.9378	-3.53966	0.555779	-4.56954	4.88796e-06	4.82423e-05	DEG
ENSG00000147100.5	SLC16A2	protein_coding	1324.97	-1.61798	0.135277	-4.56828	4.91745e-06	4.85069e-05	DEG
ENSG00000176597.7	B3GNT5	protein_coding	1188.41	1.6512	0.142596	4.56678	4.95267e-06	4.88011e-05	DEG
ENSG00000182103.3	FAM181B	protein_coding	29.532	4.85498	0.844131	4.5668	4.95236e-06	4.88011e-05	DEG
ENSG00000155957.12	TMBIM4	protein_coding	3673.02	-1.44374	0.0971998	-4.56523	4.98942e-06	4.91364e-05	DEG
ENSG00000263812.1	LINC00908	protein_coding	83.6783	-3.15799	0.47288	-4.5635	5.03068e-06	4.95158e-05	DEG
ENSG00000101955.10	SRPX	protein_coding	1479.3	-1.6107	0.133836	-4.56307	5.0412e-06	4.95924e-05	DEG
ENSG00000130203.5	APOE	protein_coding	2511.26	1.49585	0.108671	4.56283	5.04675e-06	4.962e-05	DEG
ENSG00000262202.3	SNORD3D	lincRNA	265.562	-2.37755	0.30208	-4.56021	5.1102e-06	5.02165e-05	DEG
ENSG00000198074.5	AKR1B10	protein_coding	50.7219	-3.86569	0.628752	-4.55775	5.17056e-06	5.0782e-05	DEG
ENSG00000070808.11	CAMK2A	protein_coding	194.252	2.78773	0.392422	4.55563	5.22287e-06	5.12591e-05	DEG
ENSG00000167034.9	NKX3-1	protein_coding	341.837	2.40246	0.307858	4.55555	5.22479e-06	5.12591e-05	DEG
ENSG00000070731.5	ST6GALNAC2	protein_coding	252.168	2.30425	0.286312	4.55534	5.23e-06	5.12593e-05	DEG
ENSG00000205269.4	TMEM170B	protein_coding	2563.76	1.62093	0.136311	4.55524	5.23248e-06	5.12593e-05	DEG
ENSG00000239332.1	AC016722.2	protein_coding	73.9635	-3.3405	0.513808	-4.55521	5.23332e-06	5.12593e-05	DEG
ENSG00000171612.6	SLC25A33	protein_coding	2408.62	1.50384	0.110697	4.55156	5.32485e-06	5.21277e-05	DEG
ENSG00000171148.9	TADA3	protein_coding	4695.7	-1.40247	0.0884348	-4.55102	5.3387e-06	5.22349e-05	DEG
ENSG00000162676.7	GFI1	protein_coding	74.7685	3.63464	0.579073	4.54976	5.37083e-06	5.25209e-05	DEG
ENSG00000139174.6	PRICKLE1	protein_coding	638.585	-1.93637	0.205925	-4.54713	5.43814e-06	5.31504e-05	DEG
ENSG00000250386.1	RP11-432M8.11	pseudogene	28.9577	4.83867	0.84448	4.5456	5.4779e-06	5.35101e-05	DEG
ENSG00000105281.8	SLC1A5	protein_coding	8037.83	-1.37776	0.0832029	-4.5402	5.62021e-06	5.48706e-05	DEG
ENSG00000183092.11	BEGAIN	protein_coding	93.1963	3.67043	0.58821	4.53993	5.62725e-06	5.49097e-05	DEG
ENSG00000174004.5	NRROS	protein_coding	97.8169	3.06643	0.455316	4.53845	5.66703e-06	5.5268e-05	DEG
ENSG00000120337.7	TNFSF18	protein_coding	506.194	-4.8477	0.848315	-4.5357	5.74132e-06	5.59624e-05	DEG
ENSG00000145860.7	RNF145	protein_coding	4698.22	1.44857	0.0989406	4.53375	5.79457e-06	5.6451e-05	DEG
ENSG00000104267.5	CA2	protein_coding	28.8747	4.82766	0.845341	4.52795	5.95599e-06	5.79924e-05	DEG
ENSG00000157890.13	MEGF11	protein_coding	25.4276	4.74046	0.826366	4.5264	5.99983e-06	5.83878e-05	DEG
ENSG00000196226.2	HIST1H2BB	protein_coding	991.591	-1.80405	0.177702	-4.52469	6.04854e-06	5.88302e-05	DEG
ENSG00000111231.4	GPN3	protein_coding	1655.93	1.54932	0.121418	4.52423	6.06169e-06	5.89264e-05	DEG
ENSG00000140367.7	UBE2Q2	protein_coding	5479.83	-1.42207	0.0933519	-4.52129	6.14643e-06	5.97181e-05	DEG
ENSG00000203306.3	AP001007.1	pseudogene	167.327	3.02229	0.447628	4.5178	6.24868e-06	6.0679e-05	DEG
ENSG00000184545.6	DUSP8	protein_coding	137.622	2.73695	0.384537	4.517	6.27212e-06	6.08739e-05	DEG
ENSG00000088280.14	ASAP3	protein_coding	2034.41	-1.54205	0.120006	-4.51682	6.27738e-06	6.08923e-05	DEG
ENSG00000197584.7	KCNMB2	protein_coding	29.3191	-4.84022	0.850231	-4.51668	6.28153e-06	6.08999e-05	DEG
ENSG00000026652.9	AGPAT4	protein_coding	1079.19	1.71271	0.157828	4.51571	6.31038e-06	6.11468e-05	DEG
ENSG00000230500.1	RP11-360I20.2	antisense	83.0488	-3.24445	0.497435	-4.51205	6.42055e-06	6.2181e-05	DEG
ENSG00000153485.5	TMEM251	protein_coding	888.986	1.72488	0.160736	4.50976	6.49022e-06	6.28221e-05	DEG
ENSG00000159307.14	SCUBE1	protein_coding	28.7473	4.81562	0.846207	4.50909	6.51074e-06	6.29871e-05	DEG
ENSG00000108830.7	RND2	protein_coding	309.41	2.18507	0.263025	4.50553	6.62072e-06	6.40168e-05	DEG
ENSG00000153956.11	CACNA2D1	protein_coding	2609.02	-1.49041	0.108856	-4.50509	6.63445e-06	6.41153e-05	DEG
ENSG00000152137.2	HSPB8	protein_coding	870.815	1.79492	0.176581	4.50171	6.74081e-06	6.51083e-05	DEG
ENSG00000100285.9	NEFH	protein_coding	75.6727	3.56241	0.569557	4.49895	6.82897e-06	6.59247e-05	DEG
ENSG00000169891.13	REPS2	protein_coding	292.248	2.56901	0.348806	4.49822	6.85237e-06	6.61153e-05	DEG
ENSG00000102158.15	MAGT1	protein_coding	10052.3	-1.35226	0.0783316	-4.49698	6.89261e-06	6.64682e-05	DEG
ENSG00000171862.5	PTEN	protein_coding	19290.1	-1.38112	0.0847757	-4.49559	6.93765e-06	6.68668e-05	DEG
ENSG00000204178.5	TMEM57	protein_coding	5270.59	1.38371	0.0854251	4.49171	7.0652e-06	6.80599e-05	DEG
ENSG00000171517.5	LPAR3	protein_coding	129.999	2.80297	0.401678	4.4886	7.16918e-06	6.90248e-05	DEG
ENSG00000132530.12	XAF1	protein_coding	636.168	-1.92132	0.205345	-4.48667	7.23448e-06	6.96165e-05	DEG
ENSG00000133812.10	SBF2	protein_coding	3373.48	-1.55021	0.122938	-4.47549	7.62351e-06	7.3321e-05	DEG
ENSG00000259171.1	AL163636.6	protein_coding	74.3118	-3.32467	0.520315	-4.46782	7.90225e-06	7.59616e-05	DEG
ENSG00000181773.6	GPR3	protein_coding	225.468	2.31667	0.294759	4.46693	7.9351e-06	7.62368e-05	DEG
ENSG00000172965.10	MIR4435-1HG	lincRNA	2770.31	-1.46327	0.103739	-4.46575	7.9787e-06	7.6615e-05	DEG
ENSG00000229619.3	MBNL1-AS1	antisense	313.065	-2.3327	0.298649	-4.46244	8.10333e-06	7.77705e-05	DEG
ENSG00000258555.2	SPECC1L-ADORA2A	protein_coding	53.6429	-3.80748	0.630188	-4.455	8.38946e-06	8.04739e-05	DEG
ENSG00000108344.10	PSMD3	protein_coding	12788.5	1.37544	0.0843778	4.44946	8.6087e-06	8.24457e-05	DEG
ENSG00000128045.5	RASL11B	protein_coding	66.9778	3.48294	0.558016	4.44959	8.60358e-06	8.24457e-05	DEG
ENSG00000162944.6	RFTN2	protein_coding	767.748	-2.09707	0.246562	-4.44946	8.60862e-06	8.24457e-05	DEG
ENSG00000027869.7	SH2D2A	protein_coding	46.8449	4.17412	0.7134	4.44929	8.61528e-06	8.24651e-05	DEG
ENSG00000248869.1	RP11-138I17.1	lincRNA	30.5966	-4.67488	0.826184	-4.44801	8.66684e-06	8.29147e-05	DEG
ENSG00000170561.8	IRX2	protein_coding	503.347	1.89621	0.201522	4.4472	8.69988e-06	8.31869e-05	DEG
ENSG00000137843.7	PAK6	protein_coding	49.2172	4.47242	0.781682	4.44224	8.90252e-06	8.50795e-05	DEG
ENSG00000165215.5	CLDN3	protein_coding	27.7995	4.76827	0.848556	4.44081	8.96208e-06	8.56035e-05	DEG
ENSG00000181495.1	AC026703.1	protein_coding	26.5632	-4.77645	0.85059	-4.4398	9.00409e-06	8.59594e-05	DEG
ENSG00000142945.8	KIF2C	protein_coding	1521.44	-1.56003	0.126292	-4.43443	9.23149e-06	8.80838e-05	DEG
ENSG00000073861.2	TBX21	protein_coding	54.3324	4.04069	0.685947	4.43284	9.29985e-06	8.86893e-05	DEG
ENSG00000149090.7	PAMR1	protein_coding	8313.28	-1.38233	0.086295	-4.43045	9.40384e-06	8.96337e-05	DEG
ENSG00000106785.10	TRIM14	protein_coding	587.72	-1.89591	0.202297	-4.42868	9.48124e-06	9.03239e-05	DEG
ENSG00000164430.11	MB21D1	protein_coding	1637.54	1.55456	0.12523	4.42834	9.49628e-06	9.04195e-05	DEG
ENSG00000196449.3	YRDC	protein_coding	2898.99	1.45084	0.101834	4.42723	9.54492e-06	9.08349e-05	DEG
ENSG00000006740.12	ARHGAP44	protein_coding	117.712	3.21313	0.500174	4.42472	9.65689e-06	9.18521e-05	DEG
ENSG00000144218.14	AFF3	protein_coding	790.064	-1.8645	0.195509	-4.4218	9.78813e-06	9.30516e-05	DEG
ENSG00000163362.6	C1orf106	protein_coding	57.4957	3.79699	0.63268	4.42086	9.83105e-06	9.34105e-05	DEG
ENSG00000189292.11	FAM150B	protein_coding	33.3349	4.52961	0.79844	4.42063	9.8414e-06	9.34597e-05	DEG
ENSG00000164778.4	EN2	protein_coding	36.8045	4.26778	0.739545	4.41863	9.93282e-06	9.42784e-05	DEG
ENSG00000173598.9	NUDT4	protein_coding	6789.53	-1.38044	0.0861836	-4.41431	1.0133e-05	9.61283e-05	DEG
ENSG00000164107.7	HAND2	protein_coding	85.9067	3.38319	0.5402	4.41168	1.02573e-05	9.7256e-05	DEG
ENSG00000213023.5	SYT3	protein_coding	50.6909	3.76861	0.627645	4.4111	1.02846e-05	9.74635e-05	DEG
ENSG00000100036.11	SLC35E4	protein_coding	1113.38	1.71165	0.161337	4.41094	1.02923e-05	9.74861e-05	DEG
ENSG00000136861.13	CDK5RAP2	protein_coding	786.264	-2.00408	0.227776	-4.40816	1.04251e-05	9.8692e-05	DEG
ENSG00000115194.6	SLC30A3	protein_coding	27.4546	4.74584	0.849893	4.40743	1.04606e-05	9.89764e-05	DEG
ENSG00000178573.6	MAF	protein_coding	956.682	-1.78651	0.178463	-4.4071	1.04765e-05	9.90749e-05	DEG
ENSG00000260260.1	RP11-304L19.5	lincRNA	338.411	-2.06176	0.241023	-4.4052	1.05685e-05	9.98924e-05	DEG
ENSG00000126247.6	CAPNS1	protein_coding	1542.41	-1.8791	0.199618	-4.40392	1.06311e-05	0.000100432	DEG
ENSG00000163686.9	ABHD6	protein_coding	1259.68	1.59498	0.135261	4.39873	1.08886e-05	0.000102811	DEG
ENSG00000243073.3	PRAMEF4	protein_coding	27.6355	4.74168	0.850655	4.39858	1.08959e-05	0.000102826	DEG
ENSG00000170549.3	IRX1	protein_coding	27.629	4.73908	0.850845	4.39455	1.11e-05	0.000104698	DEG
ENSG00000132153.10	DHX30	protein_coding	6361.16	1.37588	0.085561	4.39314	1.11727e-05	0.000105273	DEG
ENSG00000255103.1	KIAA0754	protein_coding	537.811	-2.09765	0.249853	-4.39317	1.1171e-05	0.000105273	DEG
ENSG00000040608.9	RTN4R	protein_coding	374.136	2.02076	0.232404	4.39218	1.12218e-05	0.000105681	DEG
ENSG00000138696.6	BMPR1B	protein_coding	65.1453	3.58025	0.588027	4.38798	1.1441e-05	0.000107641	DEG
ENSG00000158813.13	EDA	protein_coding	38.2226	4.28507	0.748655	4.38796	1.14418e-05	0.000107641	DEG
ENSG00000064042.13	LIMCH1	protein_coding	2931.19	-1.49749	0.113439	-4.38556	1.15688e-05	0.000108666	DEG
ENSG00000092969.7	TGFB2	protein_coding	467.652	-2.00177	0.228419	-4.38566	1.15635e-05	0.000108666	DEG
ENSG00000108639.3	SYNGR2	protein_coding	1430.46	1.58164	0.132621	4.38572	1.15603e-05	0.000108666	DEG
ENSG00000236104.2	ZBTB22	protein_coding	764.167	-1.74131	0.169174	-4.38191	1.17641e-05	0.000110443	DEG
ENSG00000197991.10	PCDH20	protein_coding	27.0307	4.72633	0.850764	4.37999	1.18686e-05	0.000111366	DEG
ENSG00000147408.10	CSGALNACT1	protein_coding	27.6567	4.73015	0.851702	4.37964	1.18874e-05	0.000111485	DEG
ENSG00000130821.11	SLC6A8	protein_coding	1009.26	1.71684	0.163701	4.37895	1.19251e-05	0.000111781	DEG
ENSG00000095794.15	CREM	protein_coding	2145.05	1.512	0.116996	4.37624	1.20747e-05	0.000113124	DEG
ENSG00000169314.10	C22orf15	protein_coding	107.557	-2.9875	0.454763	-4.37042	1.2401e-05	0.000116122	DEG
ENSG00000170017.8	ALCAM	protein_coding	6102.02	-1.43272	0.0990744	-4.3676	1.25619e-05	0.000117567	DEG
ENSG00000173805.11	HAP1	protein_coding	42.1984	4.04922	0.69926	4.36064	1.29682e-05	0.000121244	DEG
ENSG00000234231.2	AC093616.4	pseudogene	712.949	-1.80176	0.183858	-4.36075	1.29617e-05	0.000121244	DEG
ENSG00000111817.12	DSE	protein_coding	7809.11	-1.3463	0.0794262	-4.35997	1.3008e-05	0.000121553	DEG
ENSG00000205045.4	SLFN12L	protein_coding	30.0142	4.52817	0.809625	4.35778	1.31389e-05	0.000122713	DEG
ENSG00000164045.7	CDC25A	protein_coding	1371.19	2.82403	0.418618	4.35726	1.31702e-05	0.000122942	DEG
ENSG00000135525.14	MAP7	protein_coding	173.9	2.46357	0.335975	4.3562	1.32342e-05	0.000123476	DEG
ENSG00000182118.5	FAM89A	protein_coding	1760.86	1.55505	0.127482	4.35397	1.33693e-05	0.000124672	DEG
ENSG00000255471.1	RP11-736K20.5	antisense	52.2814	-3.67922	0.615912	-4.35	1.36135e-05	0.000126884	DEG
ENSG00000272636.1	DOC2B	protein_coding	27.4156	4.70719	0.853183	4.34513	1.39196e-05	0.00012967	DEG
ENSG00000177551.5	NHLH2	protein_coding	27.1369	4.70025	0.853316	4.33632	1.44886e-05	0.000134901	DEG
ENSG00000095002.8	MSH2	protein_coding	6044.11	1.35873	0.0827377	4.33581	1.45227e-05	0.000135149	DEG
ENSG00000161714.7	PLCD3	protein_coding	1531.51	-1.64693	0.149303	-4.33299	1.47101e-05	0.000136823	DEG
ENSG00000197860.5	SGTB	protein_coding	1968.4	-1.55046	0.127109	-4.33062	1.4869e-05	0.00013823	DEG
ENSG00000130940.10	CASZ1	protein_coding	87.7833	3.25339	0.520393	4.33018	1.48987e-05	0.000138435	DEG
ENSG00000185090.10	MANEAL	protein_coding	614.579	1.82553	0.190704	4.32887	1.49878e-05	0.000139191	DEG
ENSG00000101695.4	RNF125	protein_coding	215.121	2.62995	0.377128	4.32202	1.54608e-05	0.000143511	DEG
ENSG00000173894.6	CBX2	protein_coding	159.707	2.59716	0.369875	4.31811	1.57374e-05	0.000146002	DEG
ENSG00000131876.12	SNRPA1	protein_coding	403.31	1.96043	0.222482	4.31689	1.58243e-05	0.000146734	DEG
ENSG00000174808.7	BTC	protein_coding	71.446	3.24965	0.521539	4.31347	1.60709e-05	0.000148944	DEG
ENSG00000138028.10	CGREF1	protein_coding	544.813	1.83269	0.193179	4.31045	1.62925e-05	0.00015092	DEG
ENSG00000231500.2	RPS18	protein_coding	105051	-1.33117	0.0768347	-4.31019	1.63111e-05	0.000151016	DEG
ENSG00000106852.11	LHX6	protein_coding	26.3283	4.6781	0.853647	4.30869	1.64223e-05	0.000151967	DEG
ENSG00000259976.1	RP11-553L6.5	lincRNA	514.671	-2.02499	0.238412	-4.29924	1.71385e-05	0.000158513	DEG
ENSG00000134548.5	C12orf39	protein_coding	50.9011	3.65281	0.617535	4.2958	1.74066e-05	0.000160911	DEG
ENSG00000122592.6	HOXA7	protein_coding	227.135	2.2617	0.294055	4.29069	1.78118e-05	0.000164573	DEG
ENSG00000080031.5	PTPRH	protein_coding	634.885	1.80368	0.187316	4.2905	1.78271e-05	0.000164593	DEG
ENSG00000155265.6	GOLGA7B	protein_coding	27.4167	4.67325	0.856148	4.29044	1.78322e-05	0.000164593	DEG
ENSG00000099901.12	RANBP1	protein_coding	8282.26	1.35942	0.0839033	4.28373	1.83786e-05	0.00016955	DEG
ENSG00000146267.11	FAXC	protein_coding	577.851	1.91688	0.214129	4.28189	1.85316e-05	0.000170874	DEG
ENSG00000183337.12	BCOR	protein_coding	575.009	1.833	0.1947	4.27836	1.88272e-05	0.000173512	DEG
ENSG00000143333.6	RGS16	protein_coding	124.325	2.71842	0.401755	4.27729	1.89186e-05	0.000174265	DEG
ENSG00000179855.5	GIPC3	protein_coding	26.8403	4.65927	0.856364	4.27303	1.92833e-05	0.000177534	DEG
ENSG00000128262.4	POM121L9P	pseudogene	24.9073	-4.66088	0.857225	-4.27062	1.9493e-05	0.000179373	DEG
ENSG00000258659.2	TRIM34	protein_coding	571.37	-1.86165	0.201811	-4.26959	1.95832e-05	0.000180112	DEG
ENSG00000102837.6	OLFM4	protein_coding	24.7789	-4.65893	0.857141	-4.26876	1.96563e-05	0.000180692	DEG
ENSG00000129514.4	FOXA1	protein_coding	104.147	3.63932	0.620082	4.25641	2.07737e-05	0.000190867	DEG
ENSG00000127561.10	SYNGR3	protein_coding	398.522	2.24881	0.293415	4.25611	2.08014e-05	0.000191024	DEG
ENSG00000073712.9	FERMT2	protein_coding	18548.7	-1.31494	0.0740123	-4.25517	2.08889e-05	0.00019173	DEG
ENSG00000152953.8	STK32B	protein_coding	807.654	-1.73458	0.172814	-4.25072	2.13087e-05	0.000195485	DEG
ENSG00000086062.8	B4GALT1	protein_coding	6148.45	-1.4058	0.0955756	-4.24584	2.1778e-05	0.000199689	DEG
ENSG00000083750.8	RRAGB	protein_coding	454.68	-2.06236	0.250267	-4.24492	2.18676e-05	0.000200408	DEG
ENSG00000142541.12	RPL13A	protein_coding	128955	-1.33022	0.0778116	-4.24388	2.19683e-05	0.00020123	DEG
ENSG00000108679.8	LGALS3BP	protein_coding	3568.1	-1.41519	0.0979278	-4.23977	2.23747e-05	0.000204849	DEG
ENSG00000077009.9	NMRK2	protein_coding	25.9884	4.63219	0.856982	4.23835	2.25171e-05	0.000206048	DEG
ENSG00000166013.11	TRIM53BP	pseudogene	26.2272	4.63344	0.857332	4.23807	2.25445e-05	0.000206194	DEG
ENSG00000108771.8	DHX58	protein_coding	334.553	-2.06432	0.251355	-4.23434	2.29224e-05	0.000209544	DEG
ENSG00000186104.6	CYP2R1	protein_coding	1004.73	1.76731	0.181275	4.23284	2.30756e-05	0.000210839	DEG
ENSG00000131378.9	RFTN1	protein_coding	1655.48	-1.52126	0.123189	-4.23137	2.32269e-05	0.000212114	DEG
ENSG00000270022.2	RNU12	lincRNA	282.066	-2.42796	0.337489	-4.23115	2.325e-05	0.000212218	DEG
[truncated: 529 more rows]

## Sheet: Insignificant
Geneid	gene_name	gene_type	baseMean	log2FoldChange	lfcSE	stat	pvalue	padj	classification
[truncated: 15,580 more rows]

[truncated: 4 more sheets: Low Count, Zero Count, DESeq2 Summary, DESeq2 Params]
